# Supplementary material for: Development of a Method for Clinical Evaluation of Artificial Intelligence–Based Digital Wound Assessment Tools
Source: PubMed Central journal article supplement (PMC8134996; doi:10.1001/jamanetworkopen.2021.7234), 2021-05-19
Supplement: jamanetwopen-e217234-s001.pdf [file jamanetwopen-e217234-s001.pdf]

## Supplemental Online Content

Howell RS, Liu HH, Khan AA, et al. Development of a method for clinical evaluation of artificial intelligence–based digital wound assessment tools. *JAMA Netw Open*. 2021;4(5):e217234. doi:10.1001/jamanetworkopen.2021.7234

**eTable.** Summary Table of the Advantages and Disadvantages of Using AI-Based Digital Wound Assessment Tools

**eAppendix 1.** Individual Photographs From Site 1

**eAppendix 2.** Individual Photographs From Site 2

**eAppendix 3.** Supplementary Discussion

This supplemental material has been provided by the authors to give readers additional information about their work.

**eTable. Summary Table of the Advantages and Disadvantages of Using AI-Based Digital Wound Assessment Tools**

| <b>Advantages</b>                                                                                                                                                                                                        | <b>Disadvantages</b>                                                                                                                                                                                                                                                                     |
|--------------------------------------------------------------------------------------------------------------------------------------------------------------------------------------------------------------------------|------------------------------------------------------------------------------------------------------------------------------------------------------------------------------------------------------------------------------------------------------------------------------------------|
| <ul style="list-style-type: none"><li>• Reduced human measurement error</li><li>• Improved workflow and operation efficiency</li><li>• Contactless wound assessment</li><li>• Consistency across all providers</li></ul> | <ul style="list-style-type: none"><li>• Lack of standardized guidelines for using AI-based tools in wound assessment applications</li><li>• A need to trust system programmers</li><li>• Potential challenges for integration with other health information technology systems</li></ul> |

## eAppendix 1. Individual Photographs From Site 1

| Wound EMR Information |        |     |            |                |                   |                  |                  |                               |
|-----------------------|--------|-----|------------|----------------|-------------------|------------------|------------------|-------------------------------|
| Sequential Number     | Gender | Age | Wound Type | Wound Location | Wound Length (cm) | Wound Width (cm) | Wound Depth (cm) | Wound Area (cm <sup>2</sup> ) |
| 1                     | M      | 66  | VLU        | RLE ant        | 1.5               | 1.3              | 0.1              | 1.95                          |

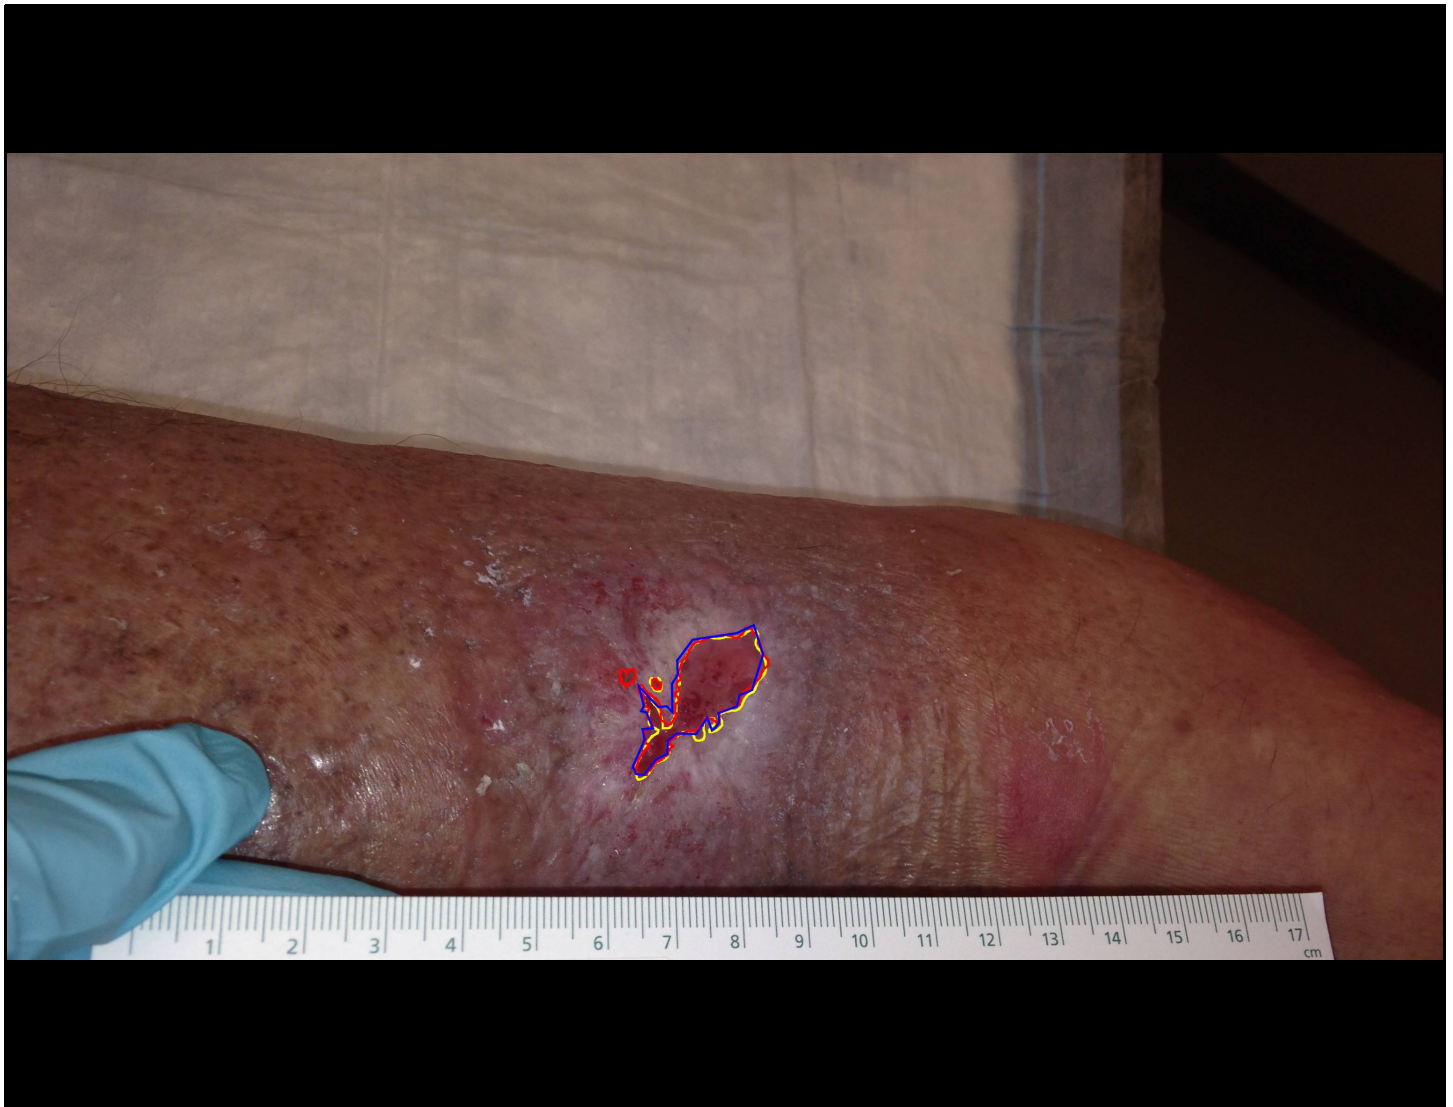

| Tracing Data |                               |                           |                               |
|--------------|-------------------------------|---------------------------|-------------------------------|
| Tracer:      | Wound Area (px <sup>2</sup> ) | Ruler Calibration (px/cm) | Wound Area (cm <sup>2</sup> ) |
| H1           | 41144                         | 154.7                     | 1.72                          |
| H2           | 41143                         | 150.6                     | 1.81                          |
| AI           | 42936                         | 189.2                     | 1.20                          |

| Tracing Comparisons     |                     |                     |                     |                     |
|-------------------------|---------------------|---------------------|---------------------|---------------------|
| Difference Metric:      | Human-Human         |                     | Human-AI            |                     |
|                         | H1(ref)<br>H2(test) | H2(ref)<br>H1(test) | H1(ref)<br>AI(test) | H2(ref)<br>AI(test) |
| False Negative Area (%) | 8.6                 | 8.6                 | 9.2                 | 7.4                 |
| False Positive Area (%) | 8.6                 | 8.6                 | 13.5                | 11.7                |
| Relative Error (%)      | 0.0                 | 0.0                 | 4.4                 | 4.4                 |

| Blinded Attending Surgeon Review |              |                      |                      |                      |              |                         |
|----------------------------------|--------------|----------------------|----------------------|----------------------|--------------|-------------------------|
| Reviewer                         | PGT Estimate | H1 meets definition? | H2 meets definition? | AI meets definition? | Which is AI? | Which is most accurate? |
| 1                                | 100          | Yes                  | No                   | Yes                  | H1           | AI                      |
| 2                                | 90           | Yes                  | No                   | No                   | H1           | AI                      |
| 3                                | 30           | Yes                  | Yes                  | No                   | H2           | AI                      |

| Wound EMR Information |        |     |            |                |                   |                  |                  |                               |
|-----------------------|--------|-----|------------|----------------|-------------------|------------------|------------------|-------------------------------|
| Sequential Number     | Gender | Age | Wound Type | Wound Location | Wound Length (cm) | Wound Width (cm) | Wound Depth (cm) | Wound Area (cm <sup>2</sup> ) |
| 2                     | M      | 51  | VLU        | LLE medial     | 0.6               | 0.3              | 0.1              | 0.18                          |

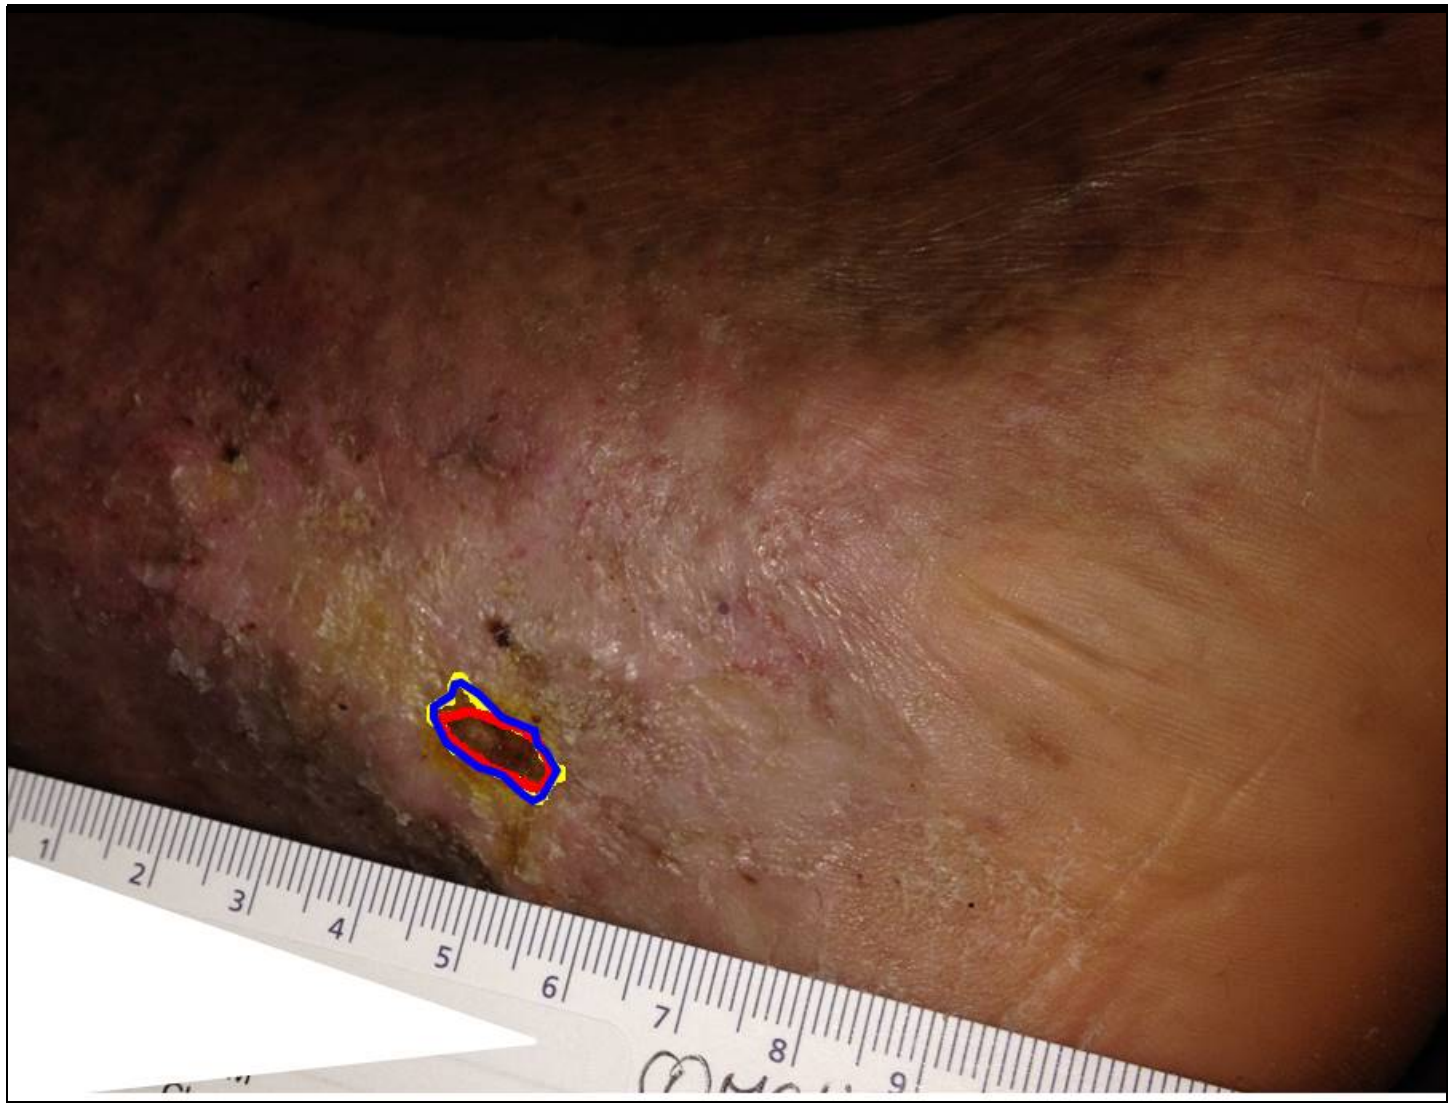

| Tracing Data |                               |                           |                               |
|--------------|-------------------------------|---------------------------|-------------------------------|
| Tracer:      | Wound Area (px <sup>2</sup> ) | Ruler Calibration (px/cm) | Wound Area (cm <sup>2</sup> ) |
| H1           | 2395                          | 67.2                      | 0.53                          |
| H2           | 1769                          | 68.1                      | 0.38                          |
| AI           | 2702                          | 62.1                      | 0.70                          |

| Tracing Comparisons     |                     |                     |                     |                     |
|-------------------------|---------------------|---------------------|---------------------|---------------------|
| Difference Metric:      | Human-Human         |                     | Human-AI            |                     |
|                         | H1(ref)<br>H2(test) | H2(ref)<br>H1(test) | H1(ref)<br>AI(test) | H2(ref)<br>AI(test) |
| False Negative Area (%) | 27.1                | 1.2                 | 3.4                 | 0.6                 |
| False Positive Area (%) | 0.9                 | 36.6                | 16.2                | 53.3                |
| Relative Error (%)      | 26.1                | 35.4                | 12.8                | 52.7                |

| Blinded Attending Surgeon Review |              |                      |                      |                      |              |                         |
|----------------------------------|--------------|----------------------|----------------------|----------------------|--------------|-------------------------|
| Reviewer                         | PGT Estimate | H1 meets definition? | H2 meets definition? | AI meets definition? | Which is AI? | Which is most accurate? |
| 1                                | 0            | No                   | Yes                  | No                   | H2           | H2                      |
| 2                                | 0            | Yes                  | No                   | Yes                  | H2           | AI                      |
| 3                                | 80           | Yes                  | Yes                  | Yes                  | AI           | H2                      |

| Wound EMR Information |        |     |            |                |                   |                  |                  |                               |
|-----------------------|--------|-----|------------|----------------|-------------------|------------------|------------------|-------------------------------|
| Sequential Number     | Gender | Age | Wound Type | Wound Location | Wound Length (cm) | Wound Width (cm) | Wound Depth (cm) | Wound Area (cm <sup>2</sup> ) |
| 3                     | M      | 56  | PU         | R heel         | 2.3               | 1.9              | 0.1              | 4.37                          |

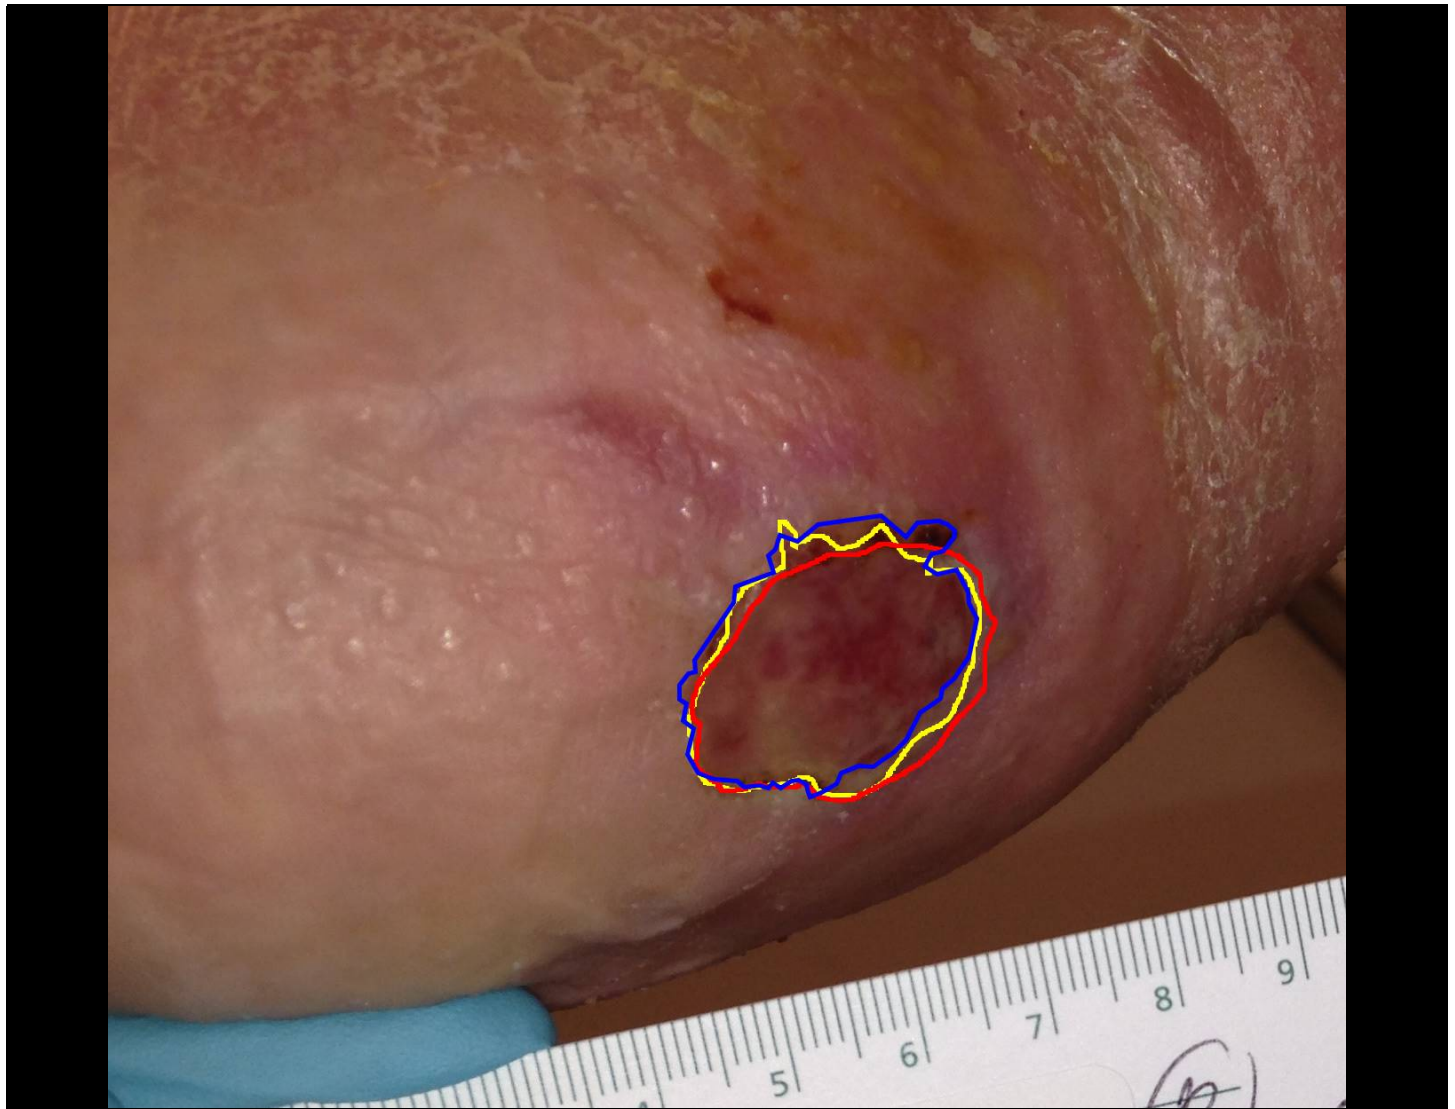

| Tracing Data |                               |                           |                               |
|--------------|-------------------------------|---------------------------|-------------------------------|
| Tracer:      | Wound Area (px <sup>2</sup> ) | Ruler Calibration (px/cm) | Wound Area (cm <sup>2</sup> ) |
| H1           | 71040                         | 150.7                     | 3.13                          |
| H2           | 71941                         | 151.7                     | 3.13                          |
| AI           | 72421                         | 155.4                     | 3.00                          |

| Tracing Comparisons     |                     |                     |                     |                     |
|-------------------------|---------------------|---------------------|---------------------|---------------------|
| Difference Metric:      | Human-Human         |                     | Human-AI            |                     |
|                         | H1(ref)<br>H2(test) | H2(ref)<br>H1(test) | H1(ref)<br>AI(test) | H2(ref)<br>AI(test) |
| False Negative Area (%) | 7.3                 | 8.4                 | 7.3                 | 13.8                |
| False Positive Area (%) | 8.5                 | 7.2                 | 9.2                 | 14.5                |
| Relative Error (%)      | 1.3                 | 1.3                 | 1.9                 | 0.7                 |

| Blinded Attending Surgeon Review |              |                      |                      |                      |              |                         |
|----------------------------------|--------------|----------------------|----------------------|----------------------|--------------|-------------------------|
| Reviewer                         | PGT Estimate | H1 meets definition? | H2 meets definition? | AI meets definition? | Which is AI? | Which is most accurate? |
| 1                                | 40           | Yes                  | No                   | No                   | AI           | H2                      |
| 2                                | 20           | Yes                  | No                   | Yes                  | AI           | AI                      |
| 3                                | 40           | Yes                  | Yes                  | Yes                  | AI           | H2                      |

| Wound EMR Information |        |     |            |                |                   |                  |                  |                               |
|-----------------------|--------|-----|------------|----------------|-------------------|------------------|------------------|-------------------------------|
| Sequential Number     | Gender | Age | Wound Type | Wound Location | Wound Length (cm) | Wound Width (cm) | Wound Depth (cm) | Wound Area (cm <sup>2</sup> ) |
| 4                     | M      | 62  | lymphedem  | RLE post       | 1.0               | 0.9              |                  | 0.90                          |

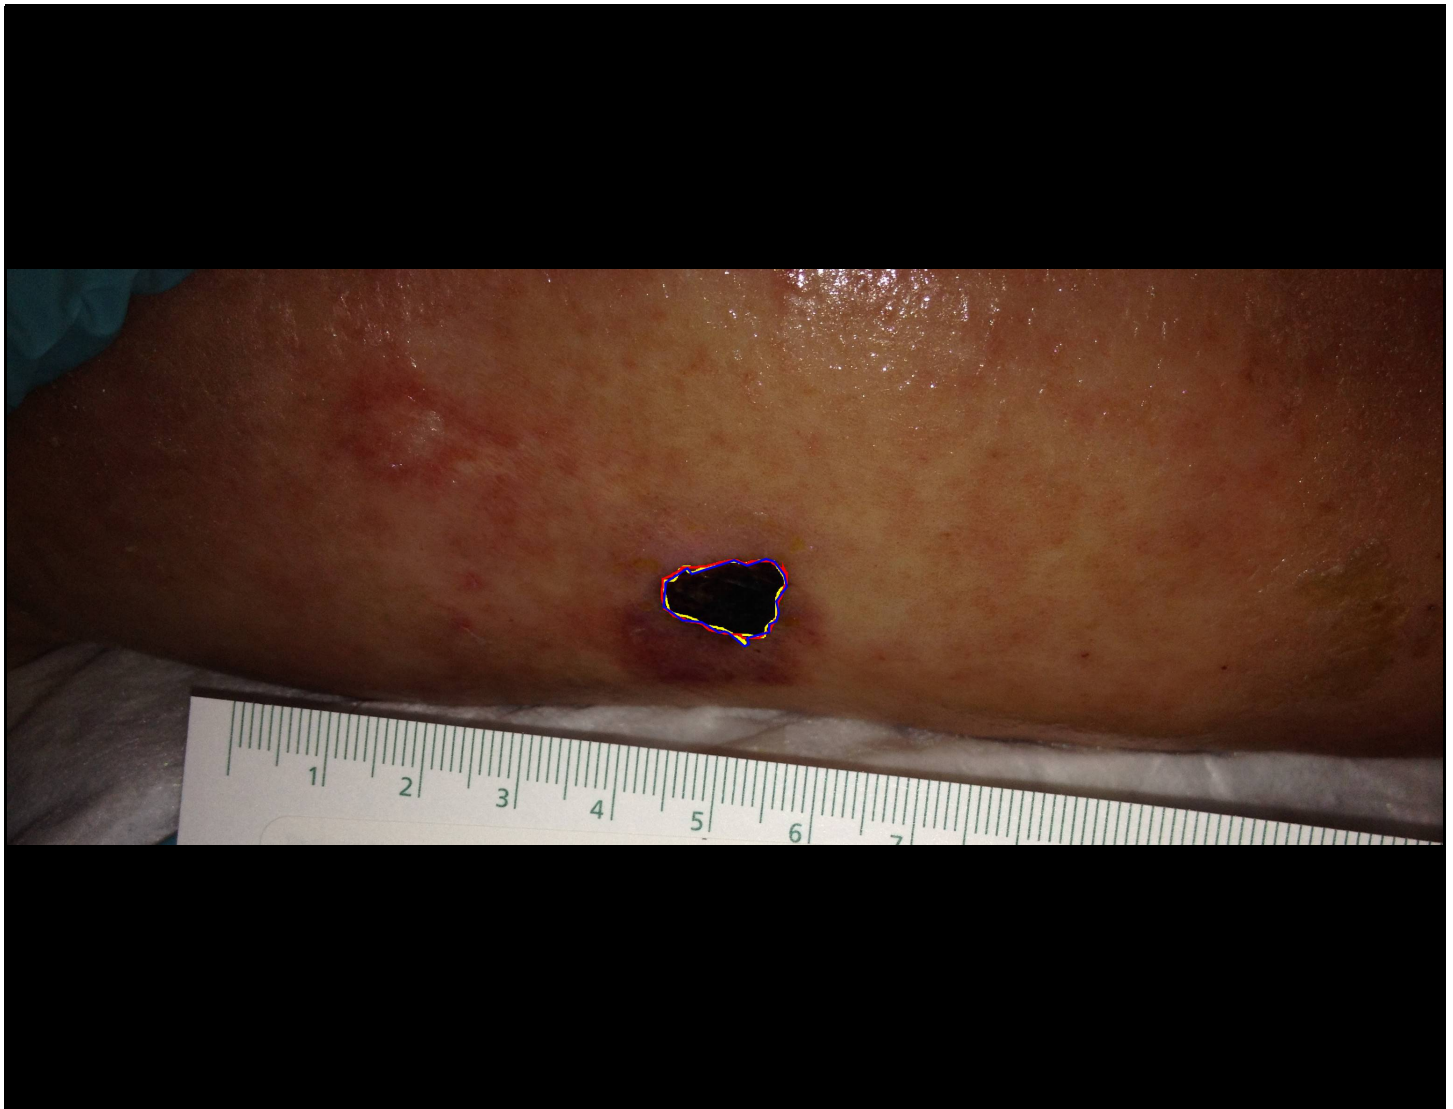

| Tracing Data |                               |                           |                               |
|--------------|-------------------------------|---------------------------|-------------------------------|
| Tracer:      | Wound Area (px <sup>2</sup> ) | Ruler Calibration (px/cm) | Wound Area (cm <sup>2</sup> ) |
| H1           | 35028                         | 222.1                     | 0.71                          |
| H2           | 37977                         | 223.5                     | 0.76                          |
| AI           | 36333                         | 213.1                     | 0.80                          |

| Tracing Comparisons     |                     |                     |                     |                     |
|-------------------------|---------------------|---------------------|---------------------|---------------------|
| Difference Metric:      | Human-Human         |                     | Human-AI            |                     |
|                         | H1(ref)<br>H2(test) | H2(ref)<br>H1(test) | H1(ref)<br>AI(test) | H2(ref)<br>AI(test) |
| False Negative Area (%) | 0.8                 | 8.5                 | 2.8                 | 6.4                 |
| False Positive Area (%) | 9.2                 | 0.7                 | 6.5                 | 2.1                 |
| Relative Error (%)      | 8.4                 | 7.8                 | 3.7                 | 4.3                 |

| Blinded Attending Surgeon Review |              |                      |                      |                      |              |                         |
|----------------------------------|--------------|----------------------|----------------------|----------------------|--------------|-------------------------|
| Reviewer                         | PGT Estimate | H1 meets definition? | H2 meets definition? | AI meets definition? | Which is AI? | Which is most accurate? |
| 1                                |              | Yes                  | Yes                  | Yes                  | AI           | 0                       |
| 2                                | 0            | Yes                  | No                   | No                   | H2           | H2                      |
| 3                                |              | No                   | Yes                  | No                   | H2           | AI                      |

| Wound EMR Information |        |     |            |                |                   |                  |                  |                               |
|-----------------------|--------|-----|------------|----------------|-------------------|------------------|------------------|-------------------------------|
| Sequential Number     | Gender | Age | Wound Type | Wound Location | Wound Length (cm) | Wound Width (cm) | Wound Depth (cm) | Wound Area (cm <sup>2</sup> ) |
| 5                     | F      | 34  | Surgical   | Abdomen        | 0.6               | 0.4              | 0.1              | 0.24                          |

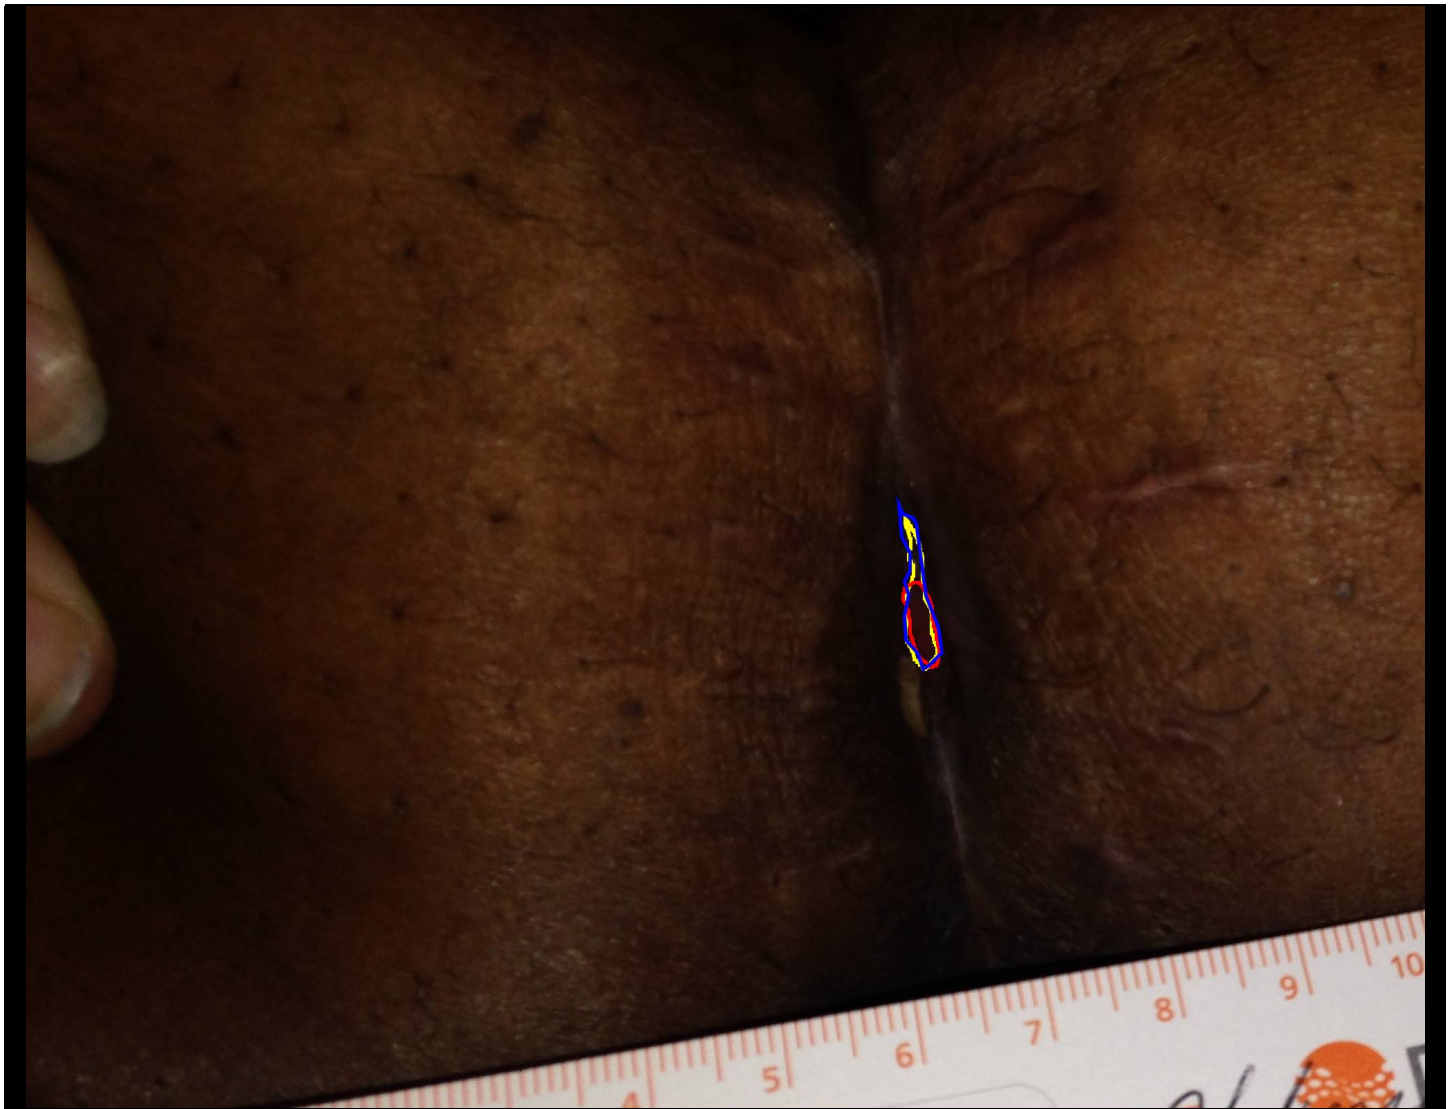

| Tracing Data |                               |                           |                               |
|--------------|-------------------------------|---------------------------|-------------------------------|
| Tracer:      | Wound Area (px <sup>2</sup> ) | Ruler Calibration (px/cm) | Wound Area (cm <sup>2</sup> ) |
| H1           | 4997                          | 188.9                     | 0.14                          |
| H2           | 3821                          | 190.8                     | 0.11                          |
| AI           | 6310                          | 251.2                     | 0.10                          |

| Tracing Comparisons     |                     |                     |                     |                     |
|-------------------------|---------------------|---------------------|---------------------|---------------------|
| Difference Metric:      | Human-Human         |                     | Human-AI            |                     |
|                         | H1(ref)<br>H2(test) | H2(ref)<br>H1(test) | H1(ref)<br>AI(test) | H2(ref)<br>AI(test) |
| False Negative Area (%) | 34.6                | 14.4                | 4.9                 | 7.6                 |
| False Positive Area (%) | 11.0                | 45.2                | 31.2                | 72.7                |
| Relative Error (%)      | 23.5                | 30.8                | 26.3                | 65.1                |

| Blinded Attending Surgeon Review |              |                      |                      |                      |              |                         |
|----------------------------------|--------------|----------------------|----------------------|----------------------|--------------|-------------------------|
| Reviewer                         | PGT Estimate | H1 meets definition? | H2 meets definition? | AI meets definition? | Which is AI? | Which is most accurate? |
| 1                                |              | Yes                  | Yes                  | Yes                  | 0            | 0                       |
| 2                                | 90           | Yes                  | No                   | No                   | H2           | H2                      |
| 3                                | 10           | Yes                  | No                   | No                   | AI           | H1                      |

| Wound EMR Information |        |     |            |                |                   |                  |                  |                               |
|-----------------------|--------|-----|------------|----------------|-------------------|------------------|------------------|-------------------------------|
| Sequential Number     | Gender | Age | Wound Type | Wound Location | Wound Length (cm) | Wound Width (cm) | Wound Depth (cm) | Wound Area (cm <sup>2</sup> ) |
| 6                     | F      | 36  | VLU        | LLE lat        | 0.9               | 1.0              | 0.1              | 0.90                          |

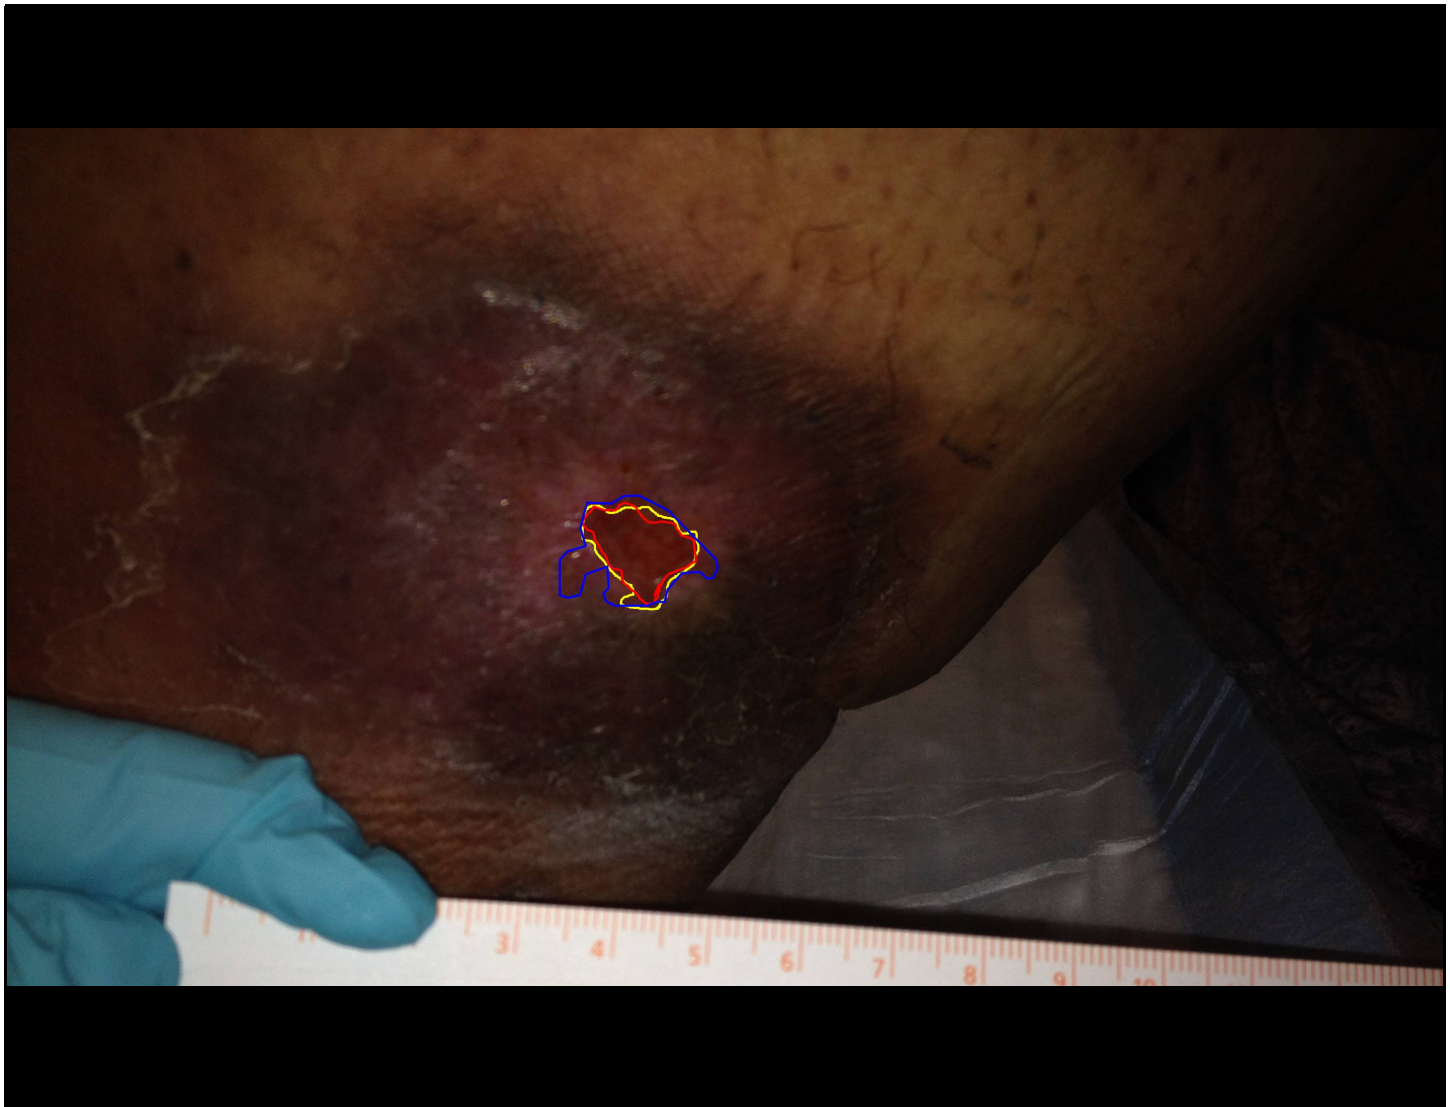

| Tracing Data |                               |                           |                               |
|--------------|-------------------------------|---------------------------|-------------------------------|
| Tracer:      | Wound Area (px <sup>2</sup> ) | Ruler Calibration (px/cm) | Wound Area (cm <sup>2</sup> ) |
| H1           | 38563                         | 220.9                     | 0.79                          |
| H2           | 31626                         | 224.6                     | 0.63                          |
| AI           | 56592                         | 226.8                     | 1.10                          |

| Tracing Comparisons     |                     |                     |                     |                     |
|-------------------------|---------------------|---------------------|---------------------|---------------------|
| Difference Metric:      | Human-Human         |                     | Human-AI            |                     |
|                         | H1(ref)<br>H2(test) | H2(ref)<br>H1(test) | H1(ref)<br>AI(test) | H2(ref)<br>AI(test) |
| False Negative Area (%) | 19.6                | 2.0                 | 1.9                 | 0.0                 |
| False Positive Area (%) | 1.6                 | 23.9                | 48.6                | 78.9                |
| Relative Error (%)      | 18.0                | 21.9                | 46.8                | 78.9                |

| Blinded Attending Surgeon Review |              |                      |                      |                      |              |                         |
|----------------------------------|--------------|----------------------|----------------------|----------------------|--------------|-------------------------|
| Reviewer                         | PGT Estimate | H1 meets definition? | H2 meets definition? | AI meets definition? | Which is AI? | Which is most accurate? |
| 1                                | 100          | No                   | Yes                  | No                   | H1           | H2                      |
| 2                                | 40           | Yes                  | Yes                  | No                   | H2           | H1                      |
| 3                                | 20           | No                   | No                   | Yes                  | AI           | H1                      |



| Wound EMR Information |        |     |            |                |                   |                  |                  |                               |
|-----------------------|--------|-----|------------|----------------|-------------------|------------------|------------------|-------------------------------|
| Sequential Number     | Gender | Age | Wound Type | Wound Location | Wound Length (cm) | Wound Width (cm) | Wound Depth (cm) | Wound Area (cm <sup>2</sup> ) |
| 7                     | M      | 90  | Trauma     | LLE ant        | 1.1               | 0.7              | 0.3              | 0.77                          |

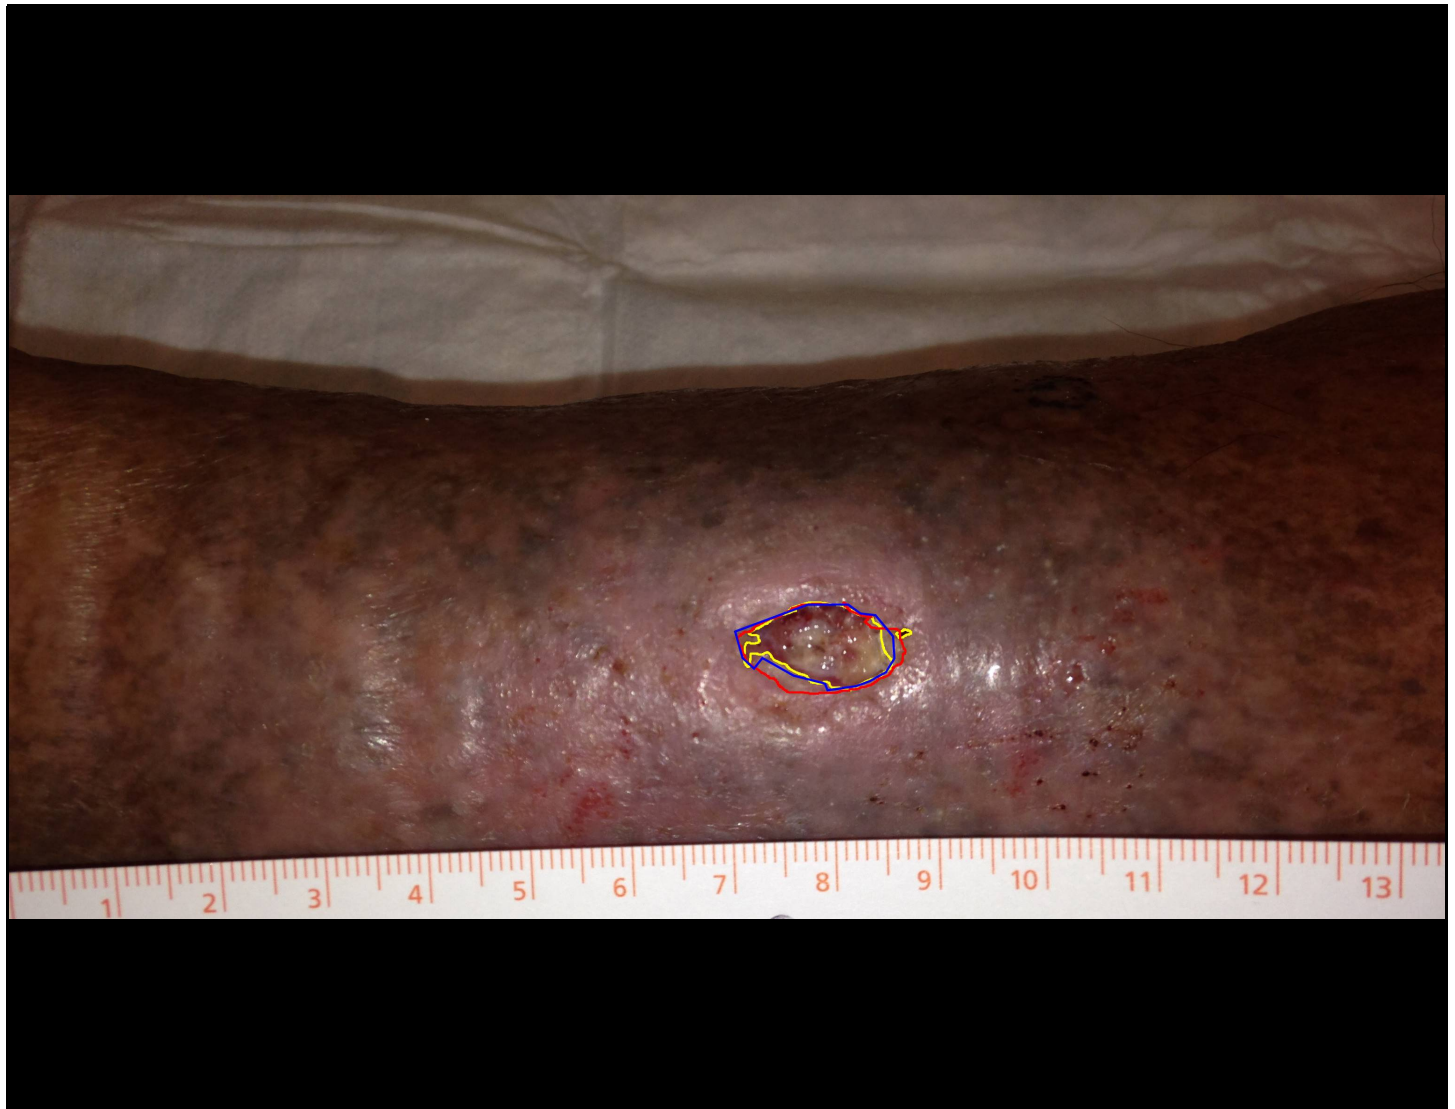

| Tracing Data |                               |                           |                               |
|--------------|-------------------------------|---------------------------|-------------------------------|
| Tracer:      | Wound Area (px <sup>2</sup> ) | Ruler Calibration (px/cm) | Wound Area (cm <sup>2</sup> ) |
| H1           | 43528                         | 234.7                     | 0.79                          |
| H2           | 55378                         | 237.4                     | 0.98                          |
| AI           | 49141                         | 247.8                     | 0.80                          |

| Tracing Comparisons     |                     |                     |                     |                     |
|-------------------------|---------------------|---------------------|---------------------|---------------------|
| Difference Metric:      | Human-Human         |                     | Human-AI            |                     |
|                         | H1(ref)<br>H2(test) | H2(ref)<br>H1(test) | H1(ref)<br>AI(test) | H2(ref)<br>AI(test) |
| False Negative Area (%) | 2.6                 | 23.4                | 2.7                 | 14.7                |
| False Positive Area (%) | 29.8                | 2.0                 | 15.6                | 3.5                 |
| Relative Error (%)      | 27.2                | 21.4                | 12.9                | 11.3                |

| Blinded Attending Surgeon Review |              |                      |                      |                      |              |                         |
|----------------------------------|--------------|----------------------|----------------------|----------------------|--------------|-------------------------|
| Reviewer                         | PGT Estimate | H1 meets definition? | H2 meets definition? | AI meets definition? | Which is AI? | Which is most accurate? |
| 1                                | 30           | No                   | Yes                  | No                   | H2           | H1                      |
| 2                                | <10          | No                   | No                   | Yes                  | AI           | AI                      |
| 3                                | 50           | No                   | Yes                  | No                   | AI           | H2                      |

| Wound EMR Information |        |     |            |                |                   |                  |                  |                               |
|-----------------------|--------|-----|------------|----------------|-------------------|------------------|------------------|-------------------------------|
| Sequential Number     | Gender | Age | Wound Type | Wound Location | Wound Length (cm) | Wound Width (cm) | Wound Depth (cm) | Wound Area (cm <sup>2</sup> ) |
| 8                     | F      | 85  | VLU        | RLE post       | 7.6               | 3.8              | 0.1              | 28.88                         |

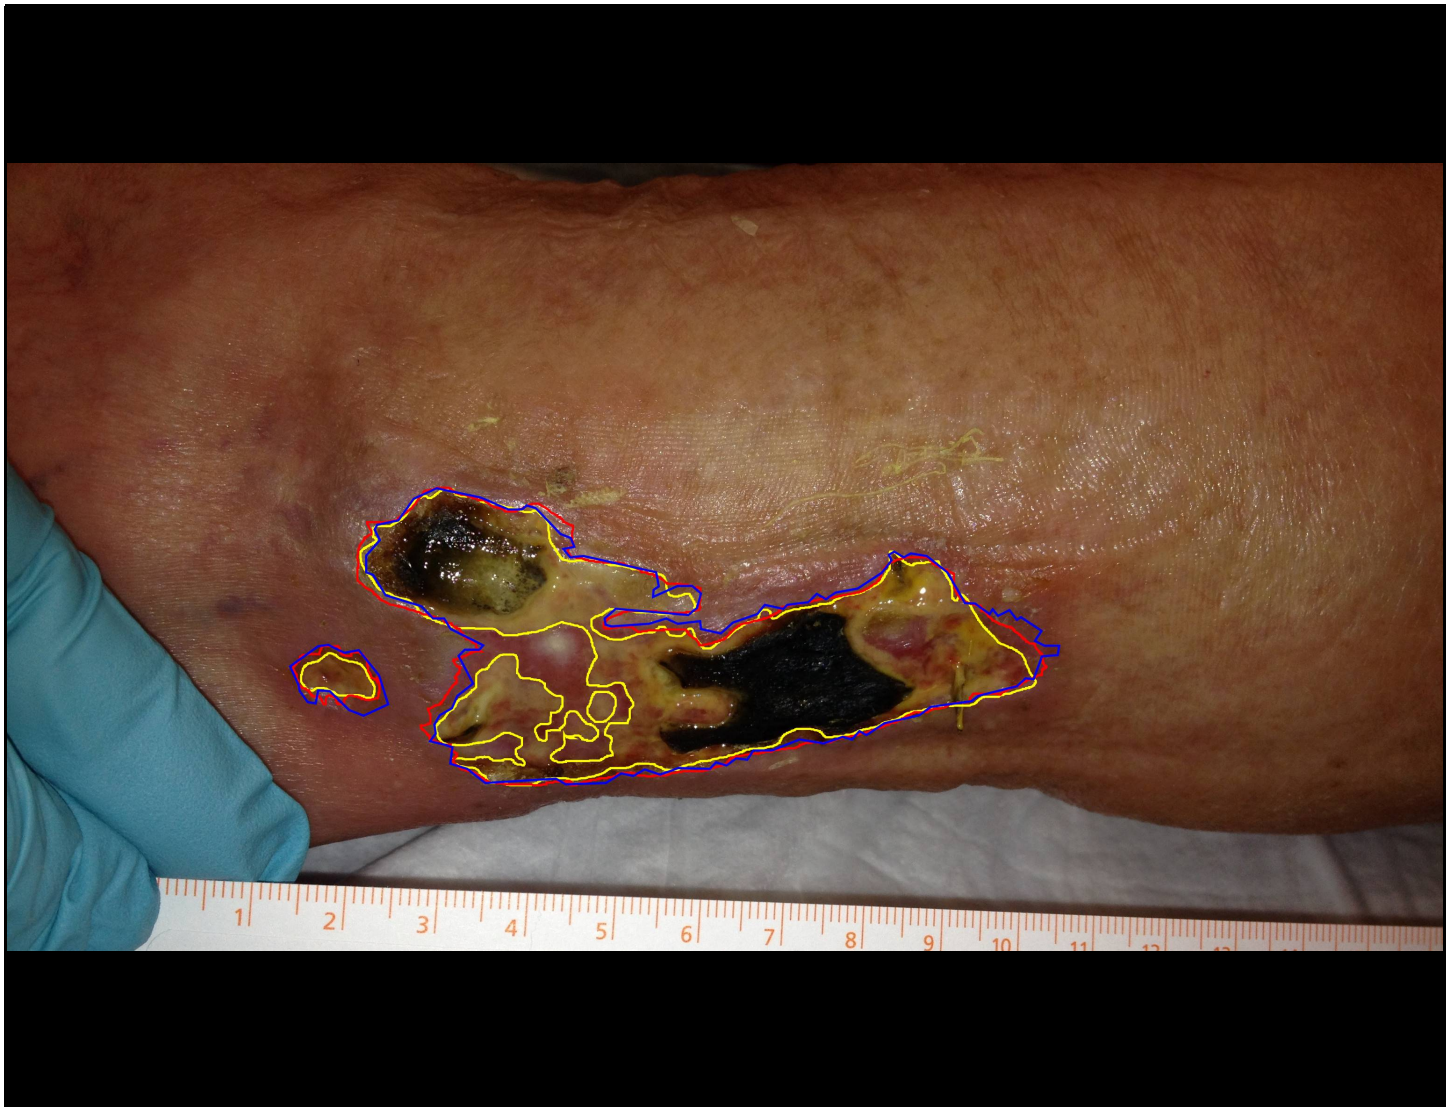

| Tracing Data |                               |                           |                               |
|--------------|-------------------------------|---------------------------|-------------------------------|
| Tracer:      | Wound Area (px <sup>2</sup> ) | Ruler Calibration (px/cm) | Wound Area (cm <sup>2</sup> ) |
| H1           | 474567                        | 204.1                     | 11.39                         |
| H2           | 579135                        | 190.4                     | 15.98                         |
| AI           | 582490                        | 212.5                     | 12.90                         |

| Tracing Comparisons     |                     |                     |                     |                     |
|-------------------------|---------------------|---------------------|---------------------|---------------------|
| Difference Metric:      | Human-Human         |                     | Human-AI            |                     |
|                         | H1(ref)<br>H2(test) | H2(ref)<br>H1(test) | H1(ref)<br>AI(test) | H2(ref)<br>AI(test) |
| False Negative Area (%) | 1.2                 | 19.0                | 1.4                 | 3.8                 |
| False Positive Area (%) | 23.2                | 1.0                 | 24.1                | 4.4                 |
| Relative Error (%)      | 22.0                | 18.1                | 22.7                | 0.6                 |

| Blinded Attending Surgeon Review |              |                      |                      |                      |              |                         |
|----------------------------------|--------------|----------------------|----------------------|----------------------|--------------|-------------------------|
| Reviewer                         | PGT Estimate | H1 meets definition? | H2 meets definition? | AI meets definition? | Which is AI? | Which is most accurate? |
| 1                                | 20           | No                   | No                   | No                   | H1           | None                    |
| 2                                | 10           | No                   | Yes                  | No                   | H2           | H1                      |
| 3                                | 40           | Yes                  | Yes                  | Yes                  | H1           | AI                      |

| Wound EMR Information |        |     |            |                |                   |                  |                  |                               |
|-----------------------|--------|-----|------------|----------------|-------------------|------------------|------------------|-------------------------------|
| Sequential Number     | Gender | Age | Wound Type | Wound Location | Wound Length (cm) | Wound Width (cm) | Wound Depth (cm) | Wound Area (cm <sup>2</sup> ) |
| 9                     | M      | 68  | lymphedem  | LLE lat        | 3.0               | 6.0              | 0.1              | 18.00                         |

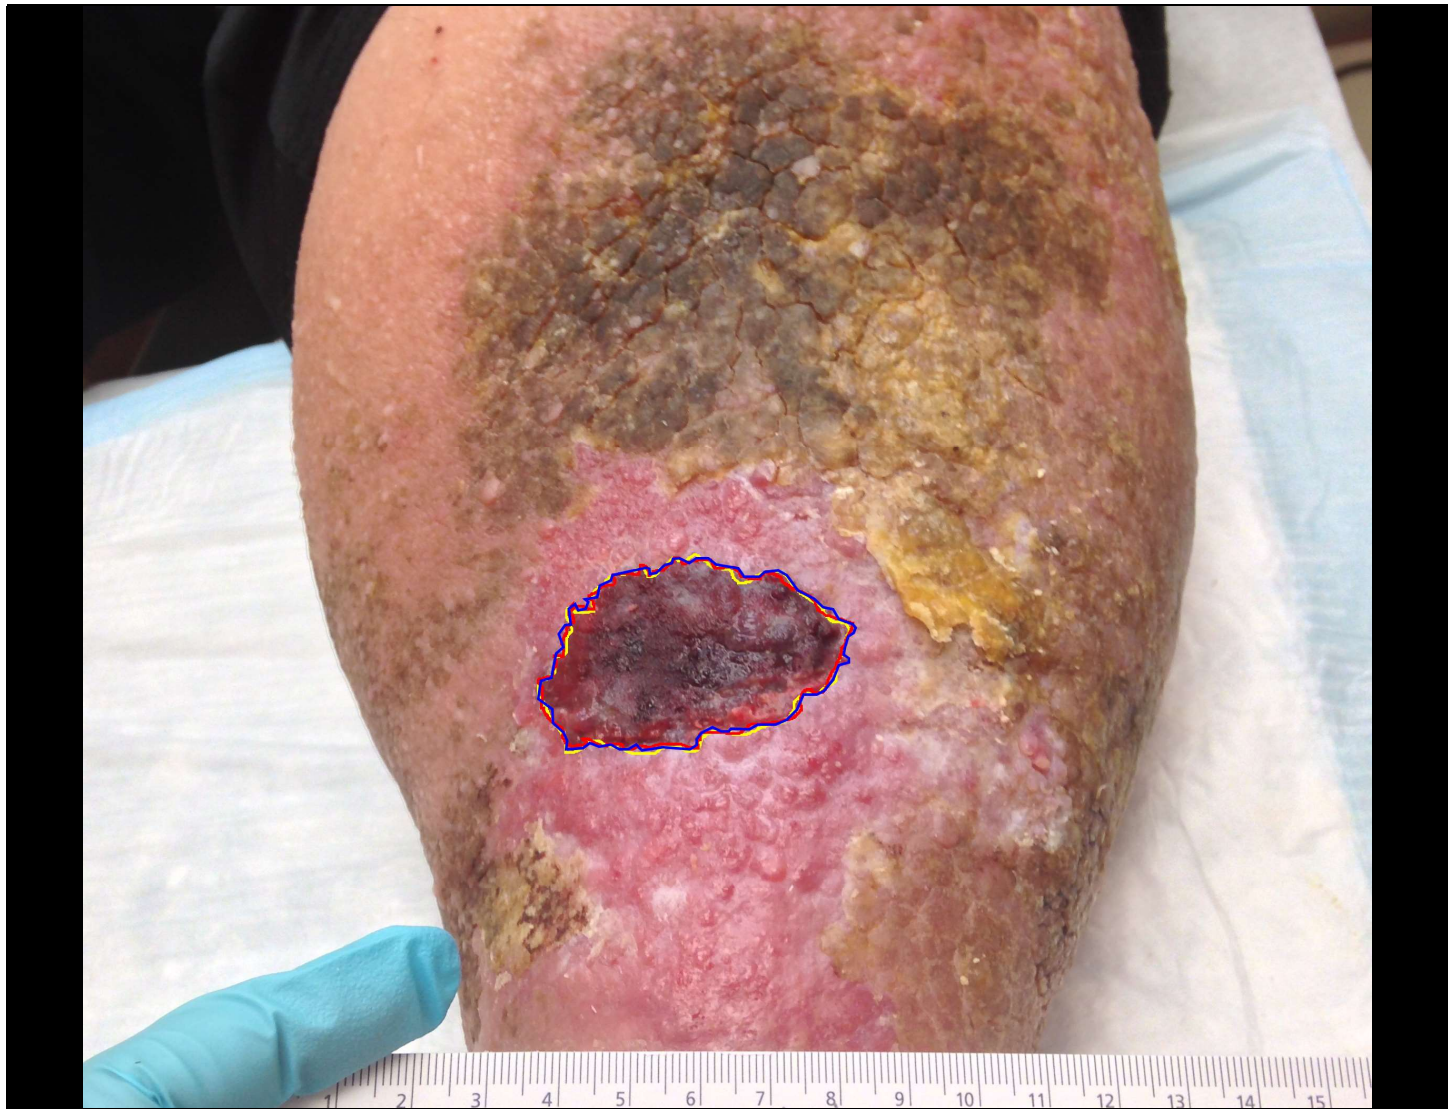

| Tracing Data |                               |                           |                               |
|--------------|-------------------------------|---------------------------|-------------------------------|
| Tracer:      | Wound Area (px <sup>2</sup> ) | Ruler Calibration (px/cm) | Wound Area (cm <sup>2</sup> ) |
| H1           | 154471                        | 134.0                     | 8.60                          |
| H2           | 152411                        | 132.1                     | 8.74                          |
| AI           | 156340                        | 138.9                     | 8.10                          |

| Tracing Comparisons     |                     |                     |                     |                     |
|-------------------------|---------------------|---------------------|---------------------|---------------------|
| Difference Metric:      | Human-Human         |                     | Human-AI            |                     |
|                         | H1(ref)<br>H2(test) | H2(ref)<br>H1(test) | H1(ref)<br>AI(test) | H2(ref)<br>AI(test) |
| False Negative Area (%) | 3.5                 | 2.2                 | 2.0                 | 1.3                 |
| False Positive Area (%) | 2.2                 | 3.6                 | 3.3                 | 3.9                 |
| Relative Error (%)      | 1.3                 | 1.4                 | 1.2                 | 2.6                 |

| Blinded Attending Surgeon Review |              |                      |                      |                      |              |                         |
|----------------------------------|--------------|----------------------|----------------------|----------------------|--------------|-------------------------|
| Reviewer                         | PGT Estimate | H1 meets definition? | H2 meets definition? | AI meets definition? | Which is AI? | Which is most accurate? |
| 1                                | 10           | Yes                  | Yes                  | Yes                  | H2           | H2                      |
| 2                                | <10          | Yes                  | Yes                  | Yes                  | AI           | AI                      |
| 3                                | 90           | Yes                  | Yes                  | Yes                  | AI           | H1                      |

| Wound EMR Information |        |     |            |                |                   |                  |                  |                               |
|-----------------------|--------|-----|------------|----------------|-------------------|------------------|------------------|-------------------------------|
| Sequential Number     | Gender | Age | Wound Type | Wound Location | Wound Length (cm) | Wound Width (cm) | Wound Depth (cm) | Wound Area (cm <sup>2</sup> ) |
| 10                    | M      | 54  | DFU        | R met head     | 2.8               | 2.7              | 0.3              | 7.56                          |

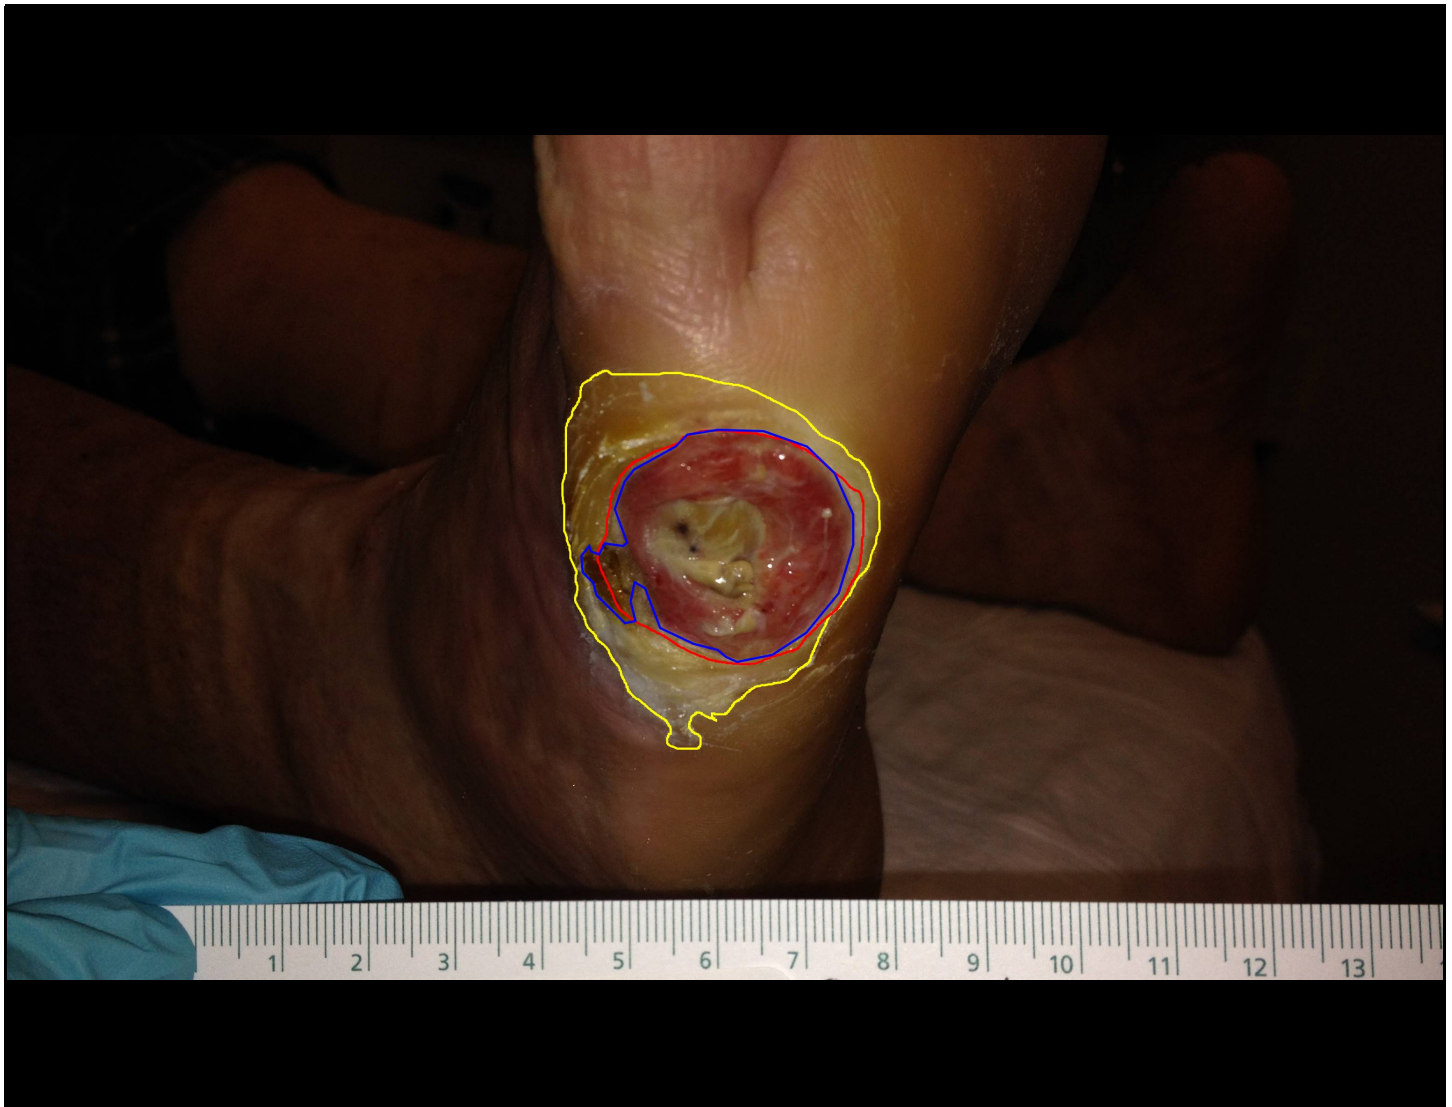

| Tracing Data |                               |                           |                               |
|--------------|-------------------------------|---------------------------|-------------------------------|
| Tracer:      | Wound Area (px <sup>2</sup> ) | Ruler Calibration (px/cm) | Wound Area (cm <sup>2</sup> ) |
| H1           | 430043                        | 200.0                     | 10.75                         |
| H2           | 244920                        | 197.3                     | 6.29                          |
| AI           | 227992                        | 196.6                     | 5.90                          |

| Tracing Comparisons     |                     |                     |                     |                     |
|-------------------------|---------------------|---------------------|---------------------|---------------------|
| Difference Metric:      | Human-Human         |                     | Human-AI            |                     |
|                         | H1(ref)<br>H2(test) | H2(ref)<br>H1(test) | H1(ref)<br>AI(test) | H2(ref)<br>AI(test) |
| False Negative Area (%) | 43.0                | 0.0                 | 47.0                | 9.6                 |
| False Positive Area (%) | 0.0                 | 75.6                | 0.0                 | 2.7                 |
| Relative Error (%)      | 43.0                | 75.6                | 47.0                | 6.9                 |

| Blinded Attending Surgeon Review |              |                      |                      |                      |              |                         |
|----------------------------------|--------------|----------------------|----------------------|----------------------|--------------|-------------------------|
| Reviewer                         | PGT Estimate | H1 meets definition? | H2 meets definition? | AI meets definition? | Which is AI? | Which is most accurate? |
| 1                                | 60           | No                   | No                   | No                   | H2           | 0                       |
| 2                                | 50           | No                   | No                   | No                   | H2           | AI                      |
| 3                                | 40           | No                   | Yes                  | Yes                  | H2           | H1                      |

| Wound EMR Information |        |     |            |                |                   |                  |                  |                               |
|-----------------------|--------|-----|------------|----------------|-------------------|------------------|------------------|-------------------------------|
| Sequential Number     | Gender | Age | Wound Type | Wound Location | Wound Length (cm) | Wound Width (cm) | Wound Depth (cm) | Wound Area (cm <sup>2</sup> ) |
| 11                    | F      | 89  | PU         | sacrum         | 5.0               | 3.3              | 2.2              | 16.50                         |

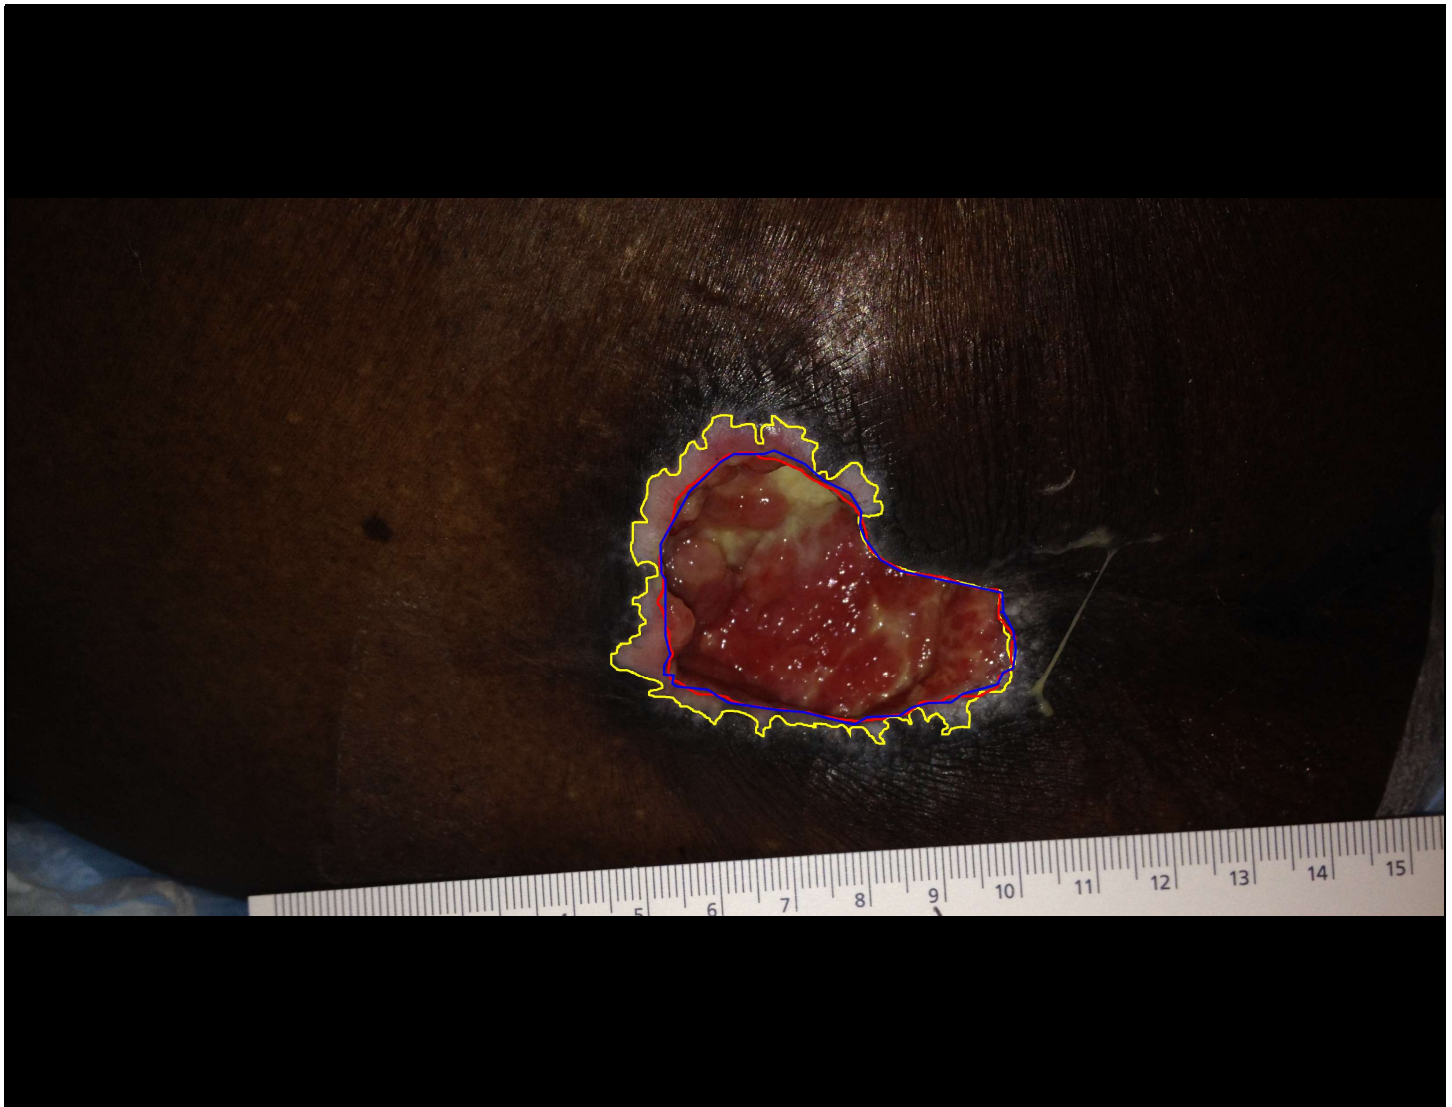

| Tracing Data |                               |                           |                               |
|--------------|-------------------------------|---------------------------|-------------------------------|
| Tracer:      | Wound Area (px <sup>2</sup> ) | Ruler Calibration (px/cm) | Wound Area (cm <sup>2</sup> ) |
| H1           | 416865                        | 167.1                     | 14.93                         |
| H2           | 327385                        | 172.4                     | 11.01                         |
| AI           | 329718                        | 166.5                     | 11.90                         |

| Tracing Comparisons     |                     |                     |                     |                     |
|-------------------------|---------------------|---------------------|---------------------|---------------------|
| Difference Metric:      | Human-Human         |                     | Human-AI            |                     |
|                         | H1(ref)<br>H2(test) | H2(ref)<br>H1(test) | H1(ref)<br>AI(test) | H2(ref)<br>AI(test) |
| False Negative Area (%) | 21.9                | 0.5                 | 21.5                | 1.7                 |
| False Positive Area (%) | 0.4                 | 27.9                | 0.6                 | 2.4                 |
| Relative Error (%)      | 21.5                | 27.3                | 20.9                | 0.7                 |

| Blinded Attending Surgeon Review |              |                      |                      |                      |              |                         |
|----------------------------------|--------------|----------------------|----------------------|----------------------|--------------|-------------------------|
| Reviewer                         | PGT Estimate | H1 meets definition? | H2 meets definition? | AI meets definition? | Which is AI? | Which is most accurate? |
| 1                                | 80           | No                   | Yes                  | Yes                  | H1           | AI                      |
| 2                                | 50           | No                   | Yes                  | Yes                  | H1           | AI                      |
| 3                                | 80           | No                   | Yes                  | Yes                  | H2           | AI                      |

| Wound EMR Information |        |     |            |                |                   |                  |                  |                               |
|-----------------------|--------|-----|------------|----------------|-------------------|------------------|------------------|-------------------------------|
| Sequential Number     | Gender | Age | Wound Type | Wound Location | Wound Length (cm) | Wound Width (cm) | Wound Depth (cm) | Wound Area (cm <sup>2</sup> ) |
| 12                    | F      | 50  | Trauma     | R med thigh    | 8.5               | 1.7              | 0.1              | 14.45                         |

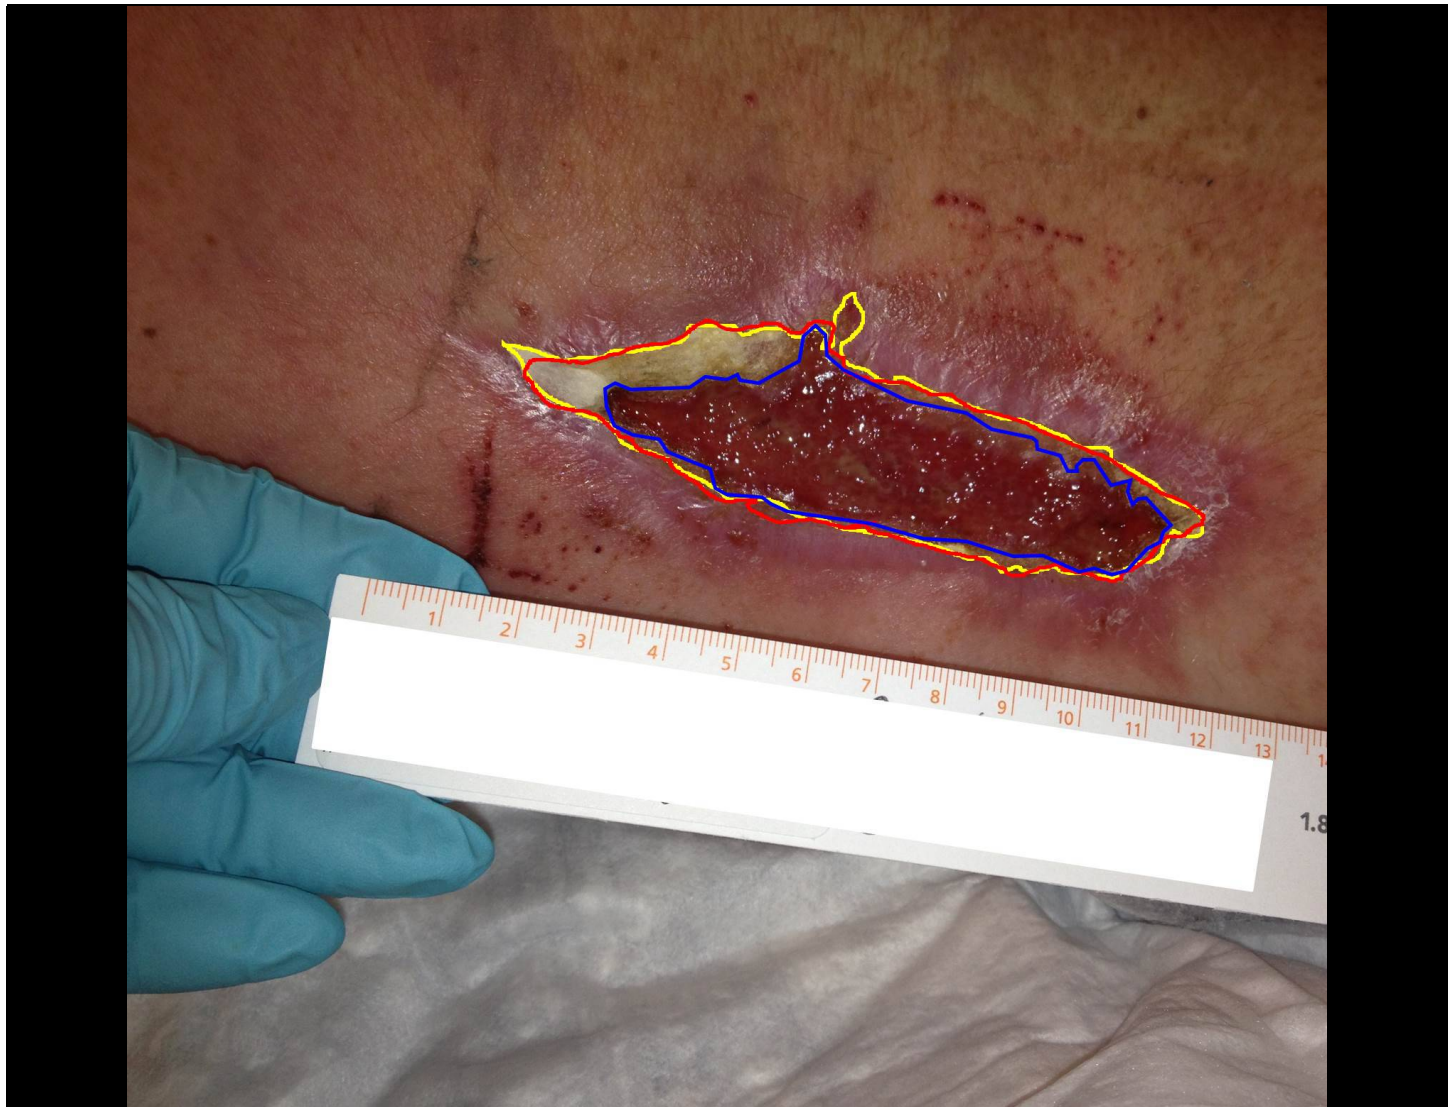

| Tracing Data |                               |                           |                               |
|--------------|-------------------------------|---------------------------|-------------------------------|
| Tracer:      | Wound Area (px <sup>2</sup> ) | Ruler Calibration (px/cm) | Wound Area (cm <sup>2</sup> ) |
| H1           | 170100                        | 98.4                      | 17.56                         |
| H2           | 168918                        | 98.9                      | 17.28                         |
| AI           | 120864                        | 104.8                     | 11.00                         |

| Tracing Comparisons     |                     |                     |                     |                     |
|-------------------------|---------------------|---------------------|---------------------|---------------------|
| Difference Metric:      | Human-Human         |                     | Human-AI            |                     |
|                         | H1(ref)<br>H2(test) | H2(ref)<br>H1(test) | H1(ref)<br>AI(test) | H2(ref)<br>AI(test) |
| False Negative Area (%) | 4.1                 | 3.5                 | 29.1                | 28.4                |
| False Positive Area (%) | 3.4                 | 4.1                 | 0.1                 | 0.0                 |
| Relative Error (%)      | 0.7                 | 0.7                 | 28.9                | 28.4                |

| Blinded Attending Surgeon Review |              |                      |                      |                      |              |                         |
|----------------------------------|--------------|----------------------|----------------------|----------------------|--------------|-------------------------|
| Reviewer                         | PGT Estimate | H1 meets definition? | H2 meets definition? | AI meets definition? | Which is AI? | Which is most accurate? |
| 1                                | 80           | No                   | No                   | Yes                  | AI           | H2                      |
| 2                                | 90           | No                   | No                   | Yes                  | H2           | H2                      |
| 3                                | 90           | Yes                  | Yes                  | No                   | H2           | AI                      |

| Wound EMR Information |        |     |            |                |                   |                  |                  |                               |
|-----------------------|--------|-----|------------|----------------|-------------------|------------------|------------------|-------------------------------|
| Sequential Number     | Gender | Age | Wound Type | Wound Location | Wound Length (cm) | Wound Width (cm) | Wound Depth (cm) | Wound Area (cm <sup>2</sup> ) |
| 13                    | F      | 61  | PU         | sacrum         | 3.5               | 7.0              | 1.5              | 24.50                         |

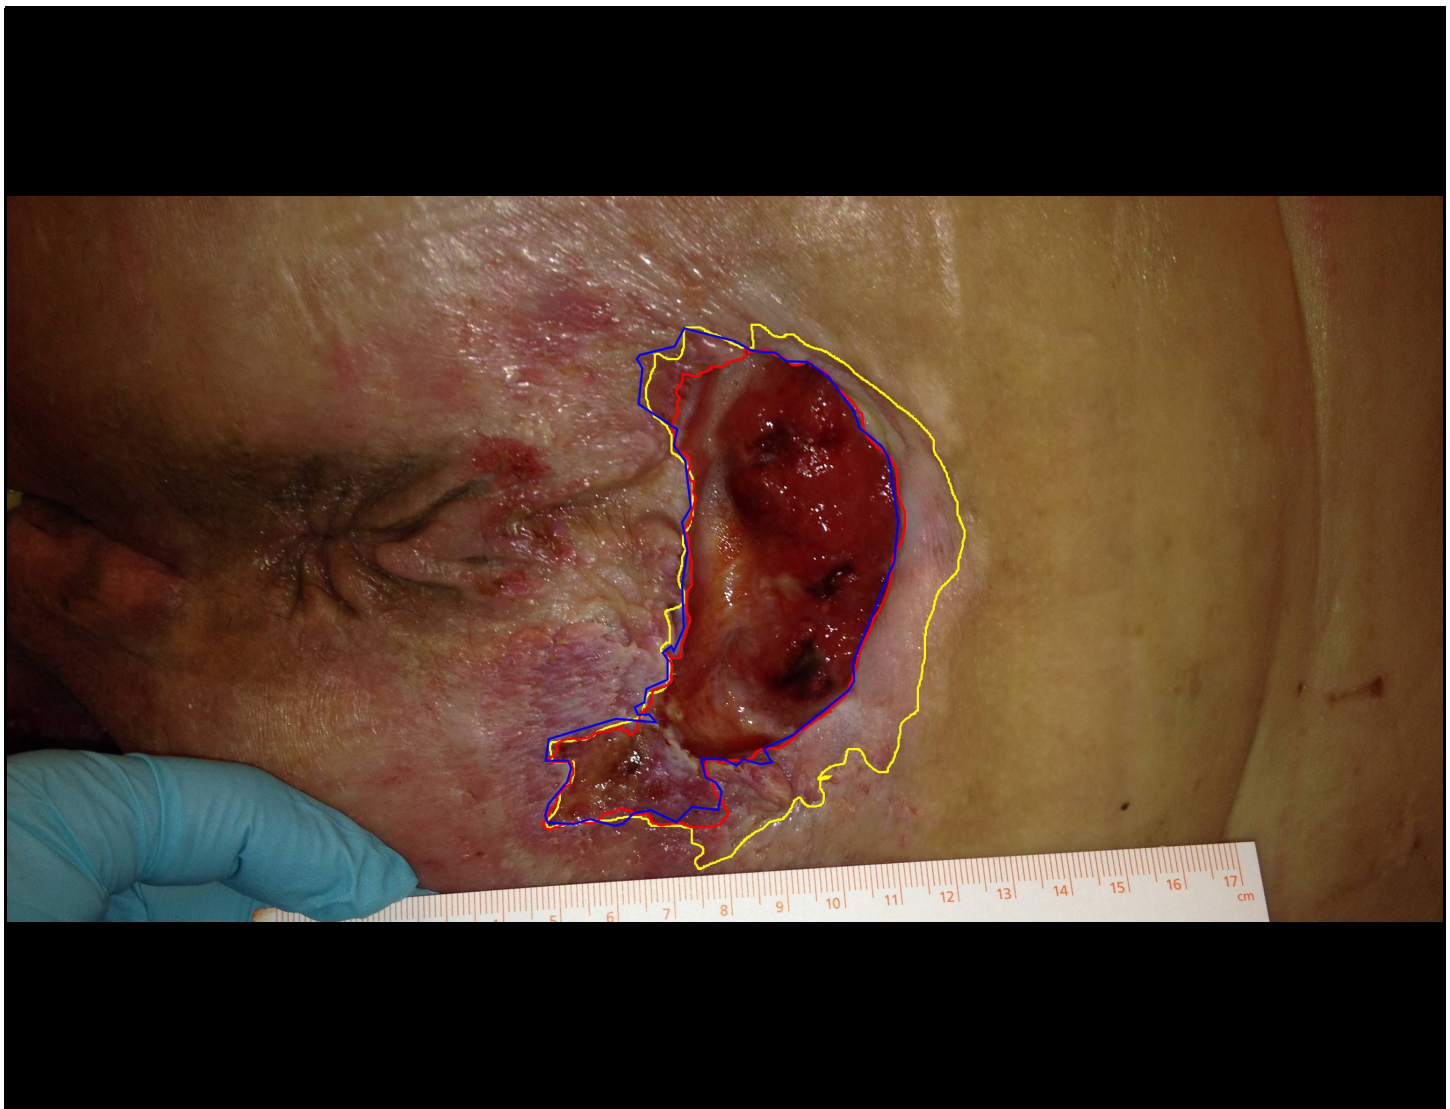

| Tracing Data |                               |                           |                               |
|--------------|-------------------------------|---------------------------|-------------------------------|
| Tracer:      | Wound Area (px <sup>2</sup> ) | Ruler Calibration (px/cm) | Wound Area (cm <sup>2</sup> ) |
| H1           | 653689                        | 128.3                     | 39.69                         |
| H2           | 442910                        | 130.9                     | 25.84                         |
| AI           | 469787                        | 129.5                     | 28.00                         |

| Tracing Comparisons     |                     |                     |                     |                     |
|-------------------------|---------------------|---------------------|---------------------|---------------------|
| Difference Metric:      | Human-Human         |                     | Human-AI            |                     |
|                         | H1(ref)<br>H2(test) | H2(ref)<br>H1(test) | H1(ref)<br>AI(test) | H2(ref)<br>AI(test) |
| False Negative Area (%) | 32.5                | 0.4                 | 30.1                | 3.2                 |
| False Positive Area (%) | 0.3                 | 48.0                | 1.9                 | 9.3                 |
| Relative Error (%)      | 32.2                | 47.6                | 28.1                | 6.1                 |

| Blinded Attending Surgeon Review |              |                      |                      |                      |              |                         |
|----------------------------------|--------------|----------------------|----------------------|----------------------|--------------|-------------------------|
| Reviewer                         | PGT Estimate | H1 meets definition? | H2 meets definition? | AI meets definition? | Which is AI? | Which is most accurate? |
| 1                                | 80           | No                   | No                   | No                   | AI           | AI                      |
| 2                                | 50           | No                   | Yes                  | No                   | H1           | AI                      |
| 3                                | 60           | No                   | Yes                  | Yes                  | H2           | AI                      |

| Wound EMR Information |        |     |            |                |                   |                  |                  |                               |
|-----------------------|--------|-----|------------|----------------|-------------------|------------------|------------------|-------------------------------|
| Sequential Number     | Gender | Age | Wound Type | Wound Location | Wound Length (cm) | Wound Width (cm) | Wound Depth (cm) | Wound Area (cm <sup>2</sup> ) |
| 14                    | F      | 78  | VLU        | LLE ankle      | 1.9               | 1.5              | 0.1              | 2.85                          |

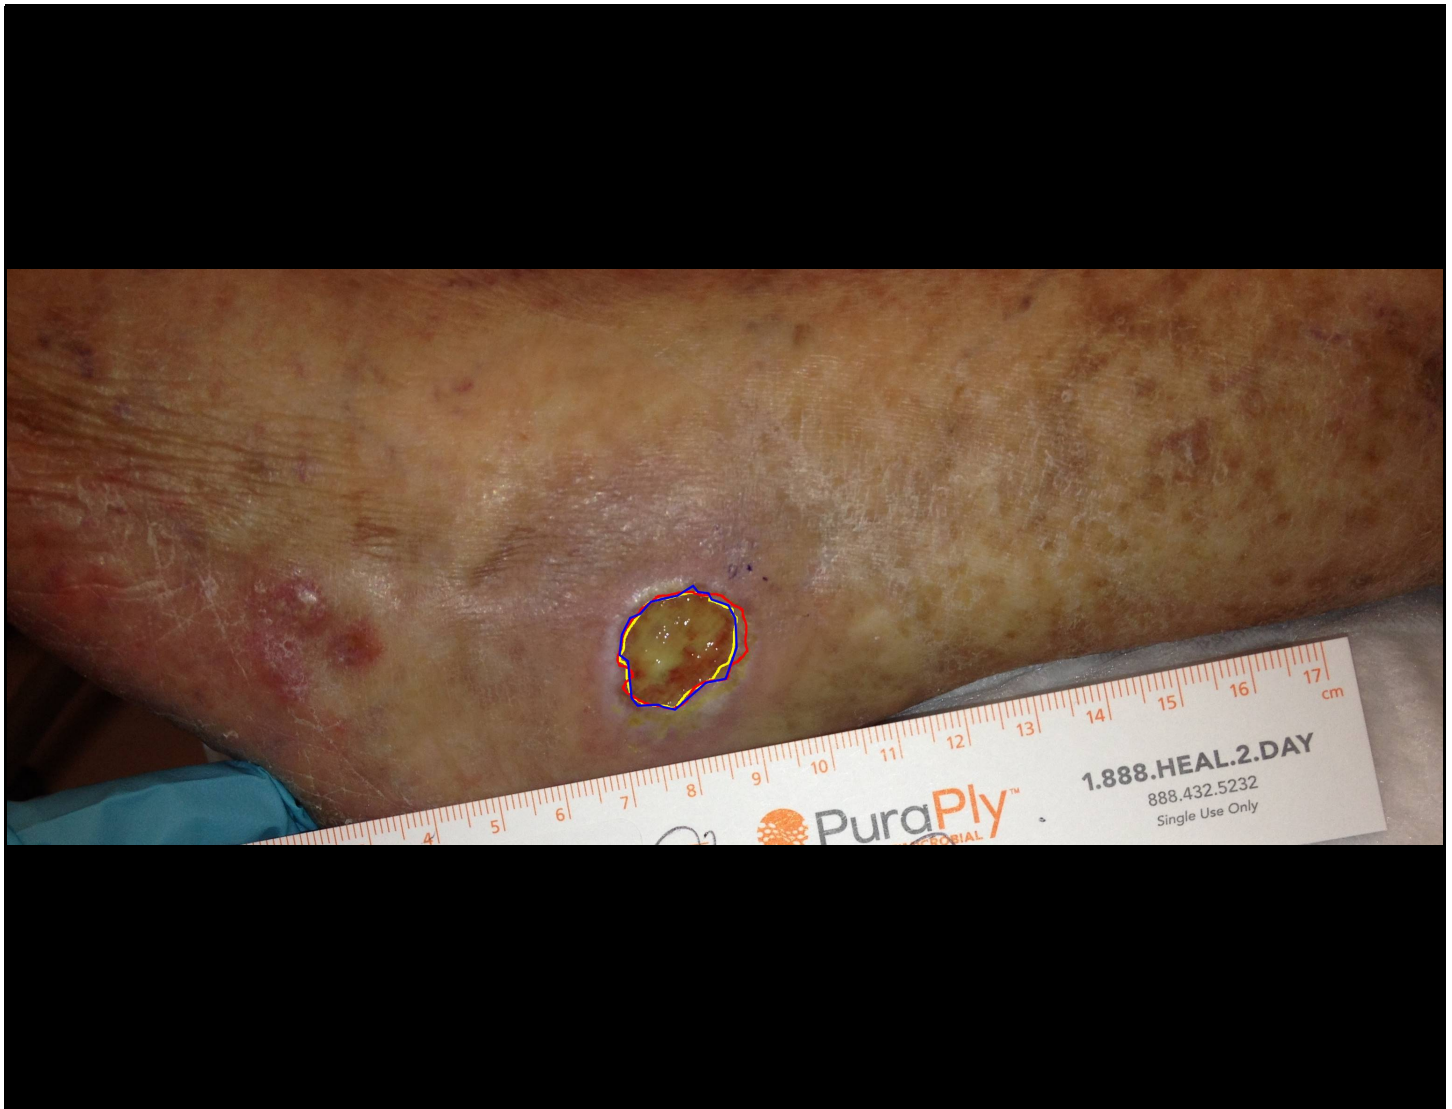

| Tracing Data |                               |                           |                               |
|--------------|-------------------------------|---------------------------|-------------------------------|
| Tracer:      | Wound Area (px <sup>2</sup> ) | Ruler Calibration (px/cm) | Wound Area (cm <sup>2</sup> ) |
| H1           | 49629                         | 149.5                     | 2.22                          |
| H2           | 56296                         | 154.1                     | 2.37                          |
| AI           | 52912                         | 148.5                     | 2.40                          |

| Tracing Comparisons     |                     |                     |                     |                     |
|-------------------------|---------------------|---------------------|---------------------|---------------------|
| Difference Metric:      | Human-Human         |                     | Human-AI            |                     |
|                         | H1(ref)<br>H2(test) | H2(ref)<br>H1(test) | H1(ref)<br>AI(test) | H2(ref)<br>AI(test) |
| False Negative Area (%) | 1.1                 | 12.8                | 1.5                 | 8.6                 |
| False Positive Area (%) | 14.5                | 1.0                 | 8.1                 | 2.6                 |
| Relative Error (%)      | 13.4                | 11.8                | 6.6                 | 6.0                 |

| Blinded Attending Surgeon Review |              |                      |                      |                      |              |                         |
|----------------------------------|--------------|----------------------|----------------------|----------------------|--------------|-------------------------|
| Reviewer                         | PGT Estimate | H1 meets definition? | H2 meets definition? | AI meets definition? | Which is AI? | Which is most accurate? |
| 1                                | 20           | Yes                  | No                   | Yes                  | H1           | H1                      |
| 2                                | 0            | Yes                  | No                   | Yes                  | H1           | H1                      |
| 3                                | 80           | Yes                  | No                   | No                   | H2           | H1                      |



| Wound EMR Information |        |     |            |                |                   |                  |                  |                               |
|-----------------------|--------|-----|------------|----------------|-------------------|------------------|------------------|-------------------------------|
| Sequential Number     | Gender | Age | Wound Type | Wound Location | Wound Length (cm) | Wound Width (cm) | Wound Depth (cm) | Wound Area (cm <sup>2</sup> ) |
| 15                    | F      | 85  | Arterial   | LLE medial     | 1.1               | 0.8              | 0.1              | 0.88                          |

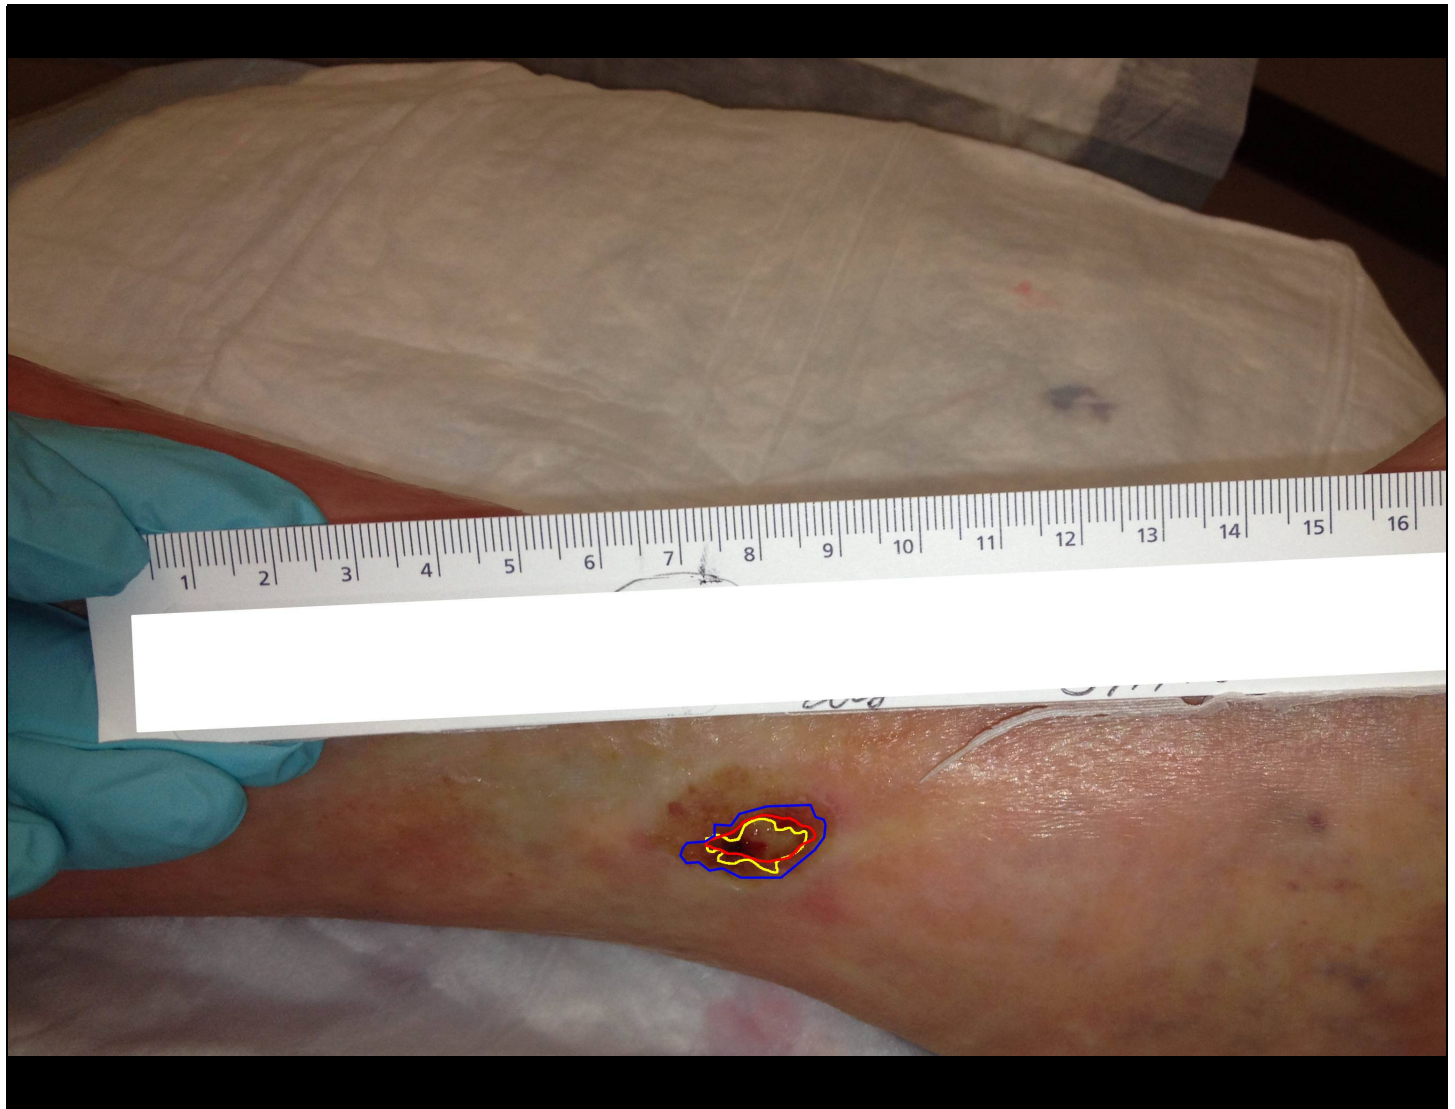

| Tracing Data |                               |                           |                               |
|--------------|-------------------------------|---------------------------|-------------------------------|
| Tracer:      | Wound Area (px <sup>2</sup> ) | Ruler Calibration (px/cm) | Wound Area (cm <sup>2</sup> ) |
| H1           | 13374                         | 172.4                     | 0.45                          |
| H2           | 14161                         | 172.1                     | 0.48                          |
| AI           | 31899                         | 163.0                     | 1.20                          |

| Tracing Comparisons     |                     |                     |                     |                     |
|-------------------------|---------------------|---------------------|---------------------|---------------------|
| Difference Metric:      | Human-Human         |                     | Human-AI            |                     |
|                         | H1(ref)<br>H2(test) | H2(ref)<br>H1(test) | H1(ref)<br>AI(test) | H2(ref)<br>AI(test) |
| False Negative Area (%) | 18.0                | 22.5                | 0.3                 | 0.1                 |
| False Positive Area (%) | 23.9                | 17.0                | 138.8               | 125.3               |
| Relative Error (%)      | 5.9                 | 5.6                 | 138.5               | 125.3               |

| Blinded Attending Surgeon Review |              |                      |                      |                      |              |                         |
|----------------------------------|--------------|----------------------|----------------------|----------------------|--------------|-------------------------|
| Reviewer                         | PGT Estimate | H1 meets definition? | H2 meets definition? | AI meets definition? | Which is AI? | Which is most accurate? |
| 1                                |              | Yes                  | Yes                  | Yes                  | 0            | 0                       |
| 2                                | 0            | No                   | Yes                  | No                   | AI           | H2                      |
| 3                                | 20           | No                   | Yes                  | No                   | AI           | H1                      |

| Wound EMR Information |        |     |            |                |                   |                  |                  |                               |
|-----------------------|--------|-----|------------|----------------|-------------------|------------------|------------------|-------------------------------|
| Sequential Number     | Gender | Age | Wound Type | Wound Location | Wound Length (cm) | Wound Width (cm) | Wound Depth (cm) | Wound Area (cm <sup>2</sup> ) |
| 16                    | F      | 80  | Trauma     | RLE lat        | 7.0               | 3.3              | 0.1              | 23.10                         |

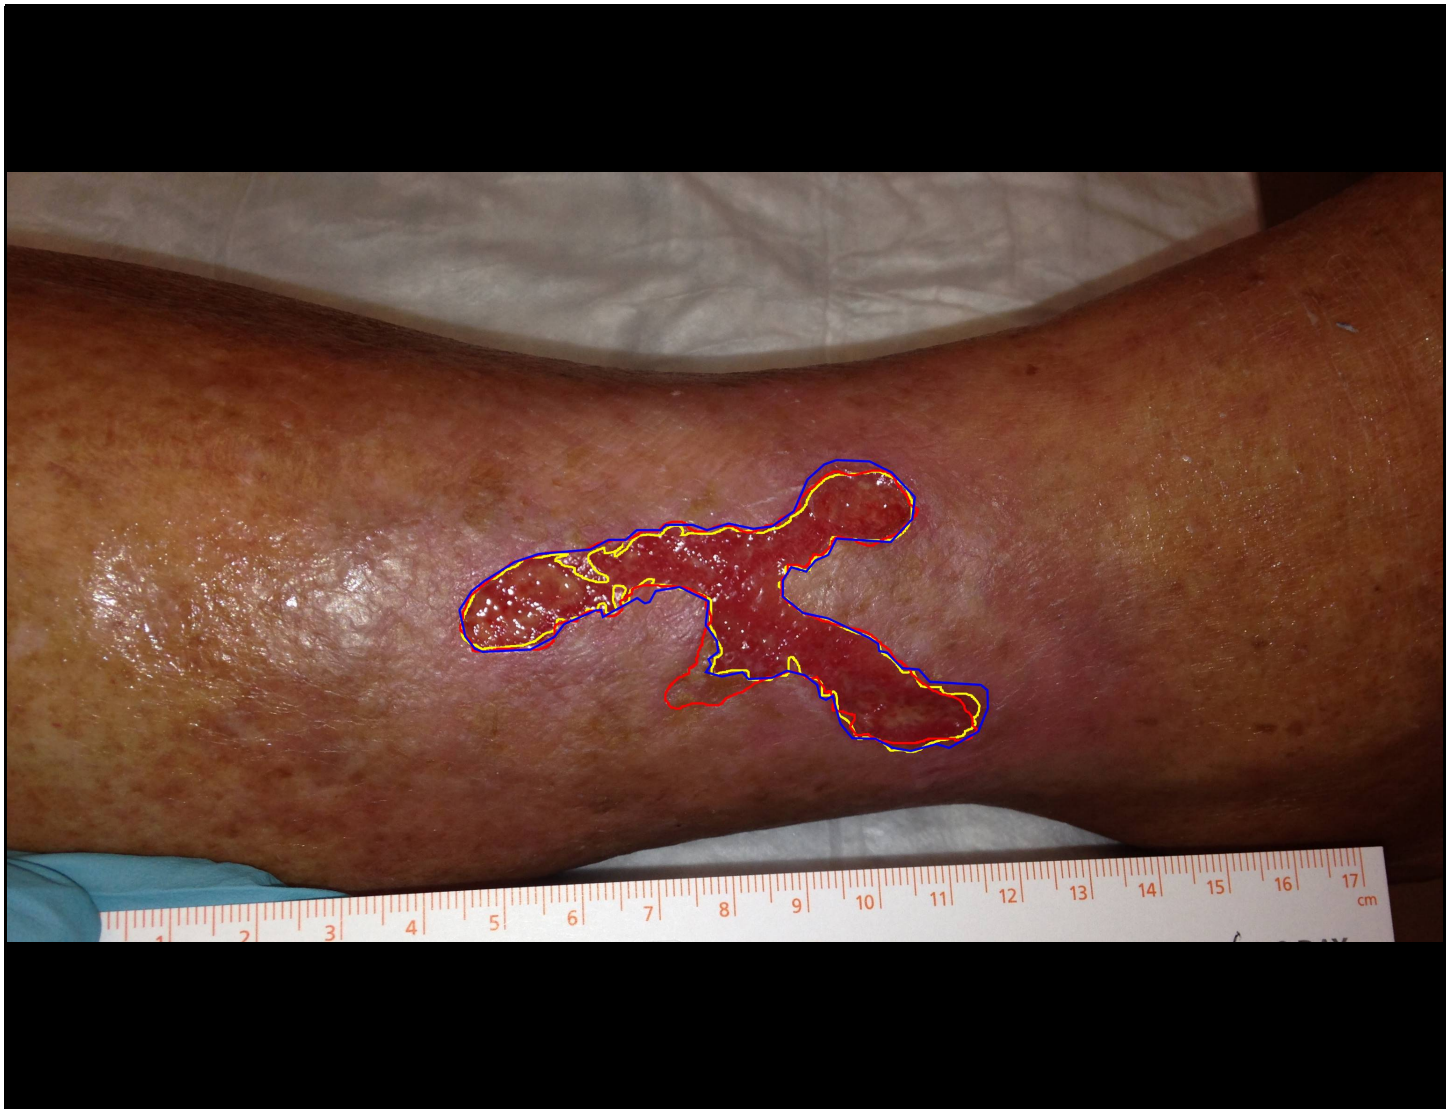

| Tracing Data |                               |                           |                               |
|--------------|-------------------------------|---------------------------|-------------------------------|
| Tracer:      | Wound Area (px <sup>2</sup> ) | Ruler Calibration (px/cm) | Wound Area (cm <sup>2</sup> ) |
| H1           | 238779                        | 160.1                     | 9.32                          |
| H2           | 268678                        | 166.2                     | 9.73                          |
| AI           | 276343                        | 183.6                     | 8.20                          |

| Tracing Comparisons     |                     |                     |                     |                     |
|-------------------------|---------------------|---------------------|---------------------|---------------------|
| Difference Metric:      | Human-Human         |                     | Human-AI            |                     |
|                         | H1(ref)<br>H2(test) | H2(ref)<br>H1(test) | H1(ref)<br>AI(test) | H2(ref)<br>AI(test) |
| False Negative Area (%) | 3.4                 | 14.2                | 0.6                 | 7.0                 |
| False Positive Area (%) | 16.0                | 3.1                 | 16.3                | 9.8                 |
| Relative Error (%)      | 12.5                | 11.1                | 15.7                | 2.9                 |

| Blinded Attending Surgeon Review |              |                      |                      |                      |              |                         |
|----------------------------------|--------------|----------------------|----------------------|----------------------|--------------|-------------------------|
| Reviewer                         | PGT Estimate | H1 meets definition? | H2 meets definition? | AI meets definition? | Which is AI? | Which is most accurate? |
| 1                                | 90           | No                   | Yes                  | Yes                  | H2           | AI                      |
| 2                                | 75           | Yes                  | No                   | Yes                  | H2           | H1                      |
| 3                                | 40           | Yes                  | No                   | Yes                  | H2           | AI                      |

| Wound EMR Information |        |     |            |                |                   |                  |                  |                               |
|-----------------------|--------|-----|------------|----------------|-------------------|------------------|------------------|-------------------------------|
| Sequential Number     | Gender | Age | Wound Type | Wound Location | Wound Length (cm) | Wound Width (cm) | Wound Depth (cm) | Wound Area (cm <sup>2</sup> ) |
| 17                    | F      | 69  | PU         | sacrum         | 3.0               | 1.2              | 2.4              | 3.60                          |

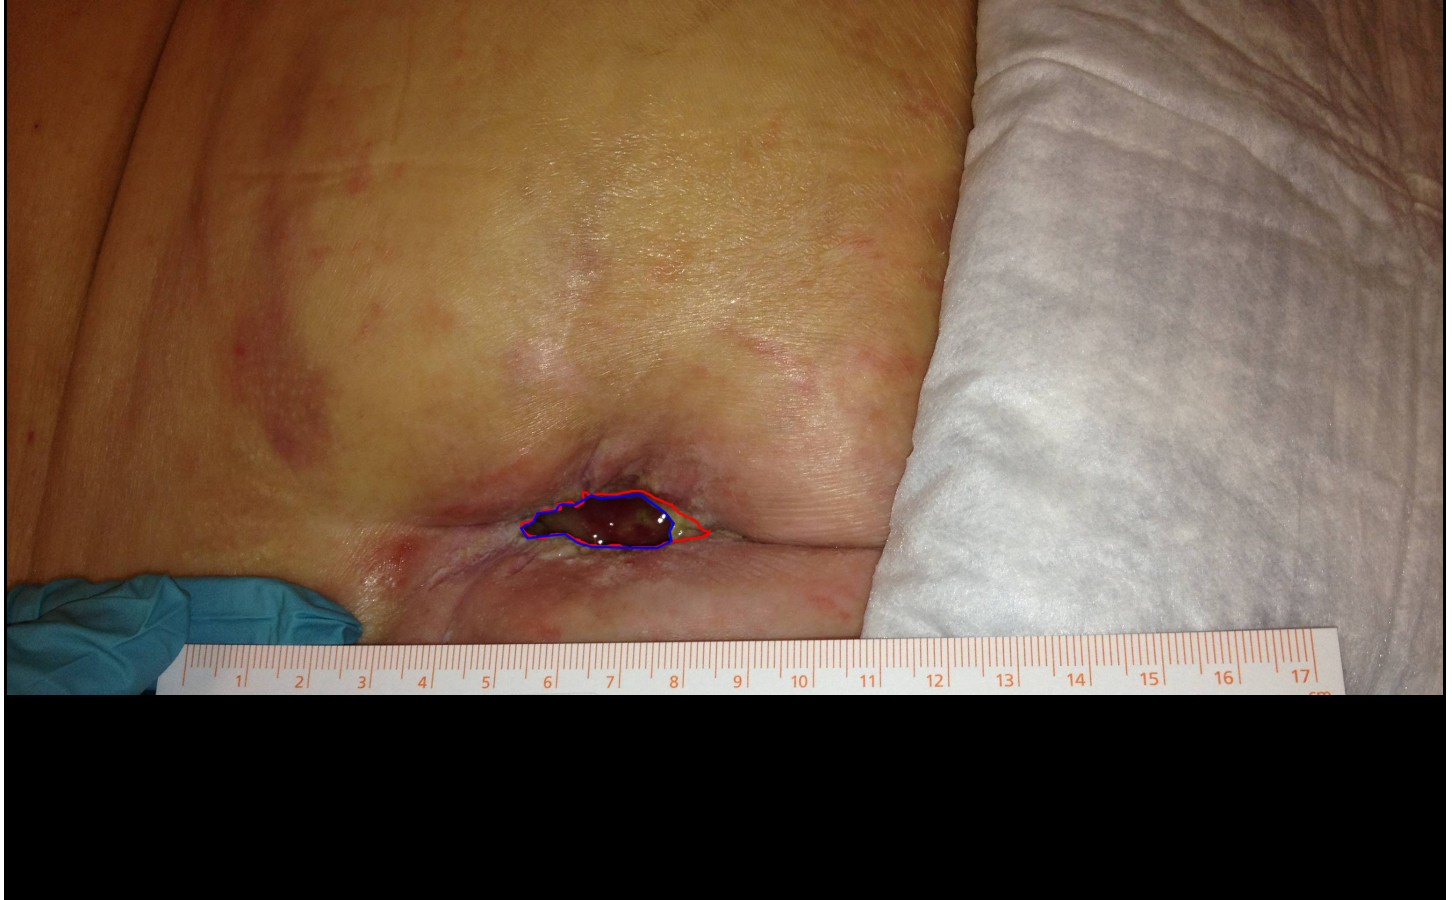

| Tracing Data |                               |                           |                               |
|--------------|-------------------------------|---------------------------|-------------------------------|
| Tracer:      | Wound Area (px <sup>2</sup> ) | Ruler Calibration (px/cm) | Wound Area (cm <sup>2</sup> ) |
| H1           |                               |                           | 1.63                          |
| H2           | 35083                         | 142.0                     | 1.74                          |
| AI           | 29478                         | 135.7                     | 1.60                          |

| Tracing Comparisons     |                     |                     |                     |                     |
|-------------------------|---------------------|---------------------|---------------------|---------------------|
| Difference Metric:      | Human-Human         |                     | Human-AI            |                     |
|                         | H1(ref)<br>H2(test) | H2(ref)<br>H1(test) | H1(ref)<br>AI(test) | H2(ref)<br>AI(test) |
| False Negative Area (%) |                     |                     |                     | 19.0                |
| False Positive Area (%) |                     |                     |                     | 3.1                 |
| Relative Error (%)      |                     |                     |                     | 16.0                |

| Blinded Attending Surgeon Review |              |                      |                      |                      |              |                         |
|----------------------------------|--------------|----------------------|----------------------|----------------------|--------------|-------------------------|
| Reviewer                         | PGT Estimate | H1 meets definition? | H2 meets definition? | AI meets definition? | Which is AI? | Which is most accurate? |
| 1                                |              | Yes                  | Yes                  | No                   | H1           | AI                      |
| 2                                | 0            | No                   | No                   | Yes                  | H2           | H2                      |
| 3                                | 60           | Yes                  | Yes                  | No                   | H2           | H2                      |

| Wound EMR Information |        |     |            |                |                   |                  |                  |                               |
|-----------------------|--------|-----|------------|----------------|-------------------|------------------|------------------|-------------------------------|
| Sequential Number     | Gender | Age | Wound Type | Wound Location | Wound Length (cm) | Wound Width (cm) | Wound Depth (cm) | Wound Area (cm <sup>2</sup> ) |
| 18                    | F      | 86  | Nec Fasc   | LLE lat        | 0.4               | 0.4              | 0.2              | 0.16                          |

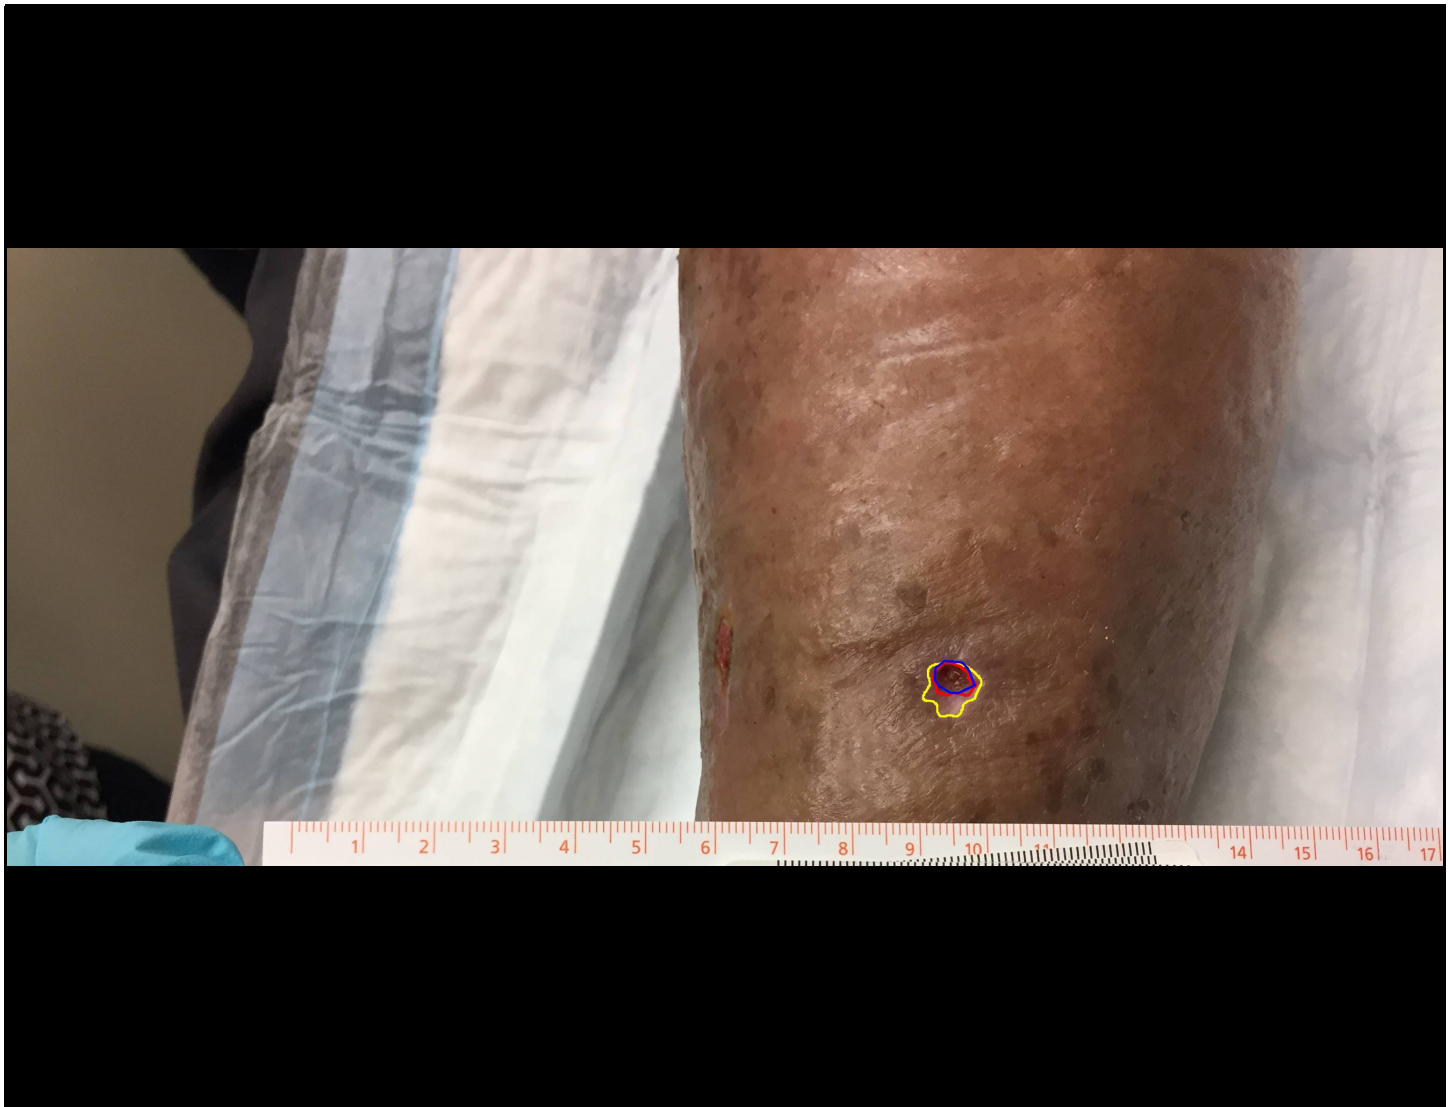

| Tracing Data |                               |                           |                               |
|--------------|-------------------------------|---------------------------|-------------------------------|
| Tracer:      | Wound Area (px <sup>2</sup> ) | Ruler Calibration (px/cm) | Wound Area (cm <sup>2</sup> ) |
| H1           | 11232                         | 151.4                     | 0.49                          |
| H2           | 5139                          | 153.2                     | 0.22                          |
| AI           | 4914                          | 156.7                     | 0.20                          |

| Tracing Comparisons     |                     |                     |                     |                     |
|-------------------------|---------------------|---------------------|---------------------|---------------------|
| Difference Metric:      | Human-Human         |                     | Human-AI            |                     |
|                         | H1(ref)<br>H2(test) | H2(ref)<br>H1(test) | H1(ref)<br>AI(test) | H2(ref)<br>AI(test) |
| False Negative Area (%) | 54.3                | 0.1                 | 57.6                | 17.1                |
| False Positive Area (%) | 0.1                 | 118.7               | 1.3                 | 12.7                |
| Relative Error (%)      | 54.2                | 118.6               | 56.3                | 4.4                 |

| Blinded Attending Surgeon Review |              |                      |                      |                      |              |                         |
|----------------------------------|--------------|----------------------|----------------------|----------------------|--------------|-------------------------|
| Reviewer                         | PGT Estimate | H1 meets definition? | H2 meets definition? | AI meets definition? | Which is AI? | Which is most accurate? |
| 1                                | 100          | No                   | Yes                  | Yes                  | AI           | AI                      |
| 2                                | 0            | No                   | Yes                  | Yes                  | AI           | H2                      |
| 3                                | 0            | No                   | Yes                  | Yes                  | AI           | H2                      |

| Wound EMR Information |        |     |            |                |                   |                  |                  |                               |
|-----------------------|--------|-----|------------|----------------|-------------------|------------------|------------------|-------------------------------|
| Sequential Number     | Gender | Age | Wound Type | Wound Location | Wound Length (cm) | Wound Width (cm) | Wound Depth (cm) | Wound Area (cm <sup>2</sup> ) |
| 19                    | F      | 83  | Trauma     | R knee         | 0.9               | 1.0              |                  | 0.90                          |

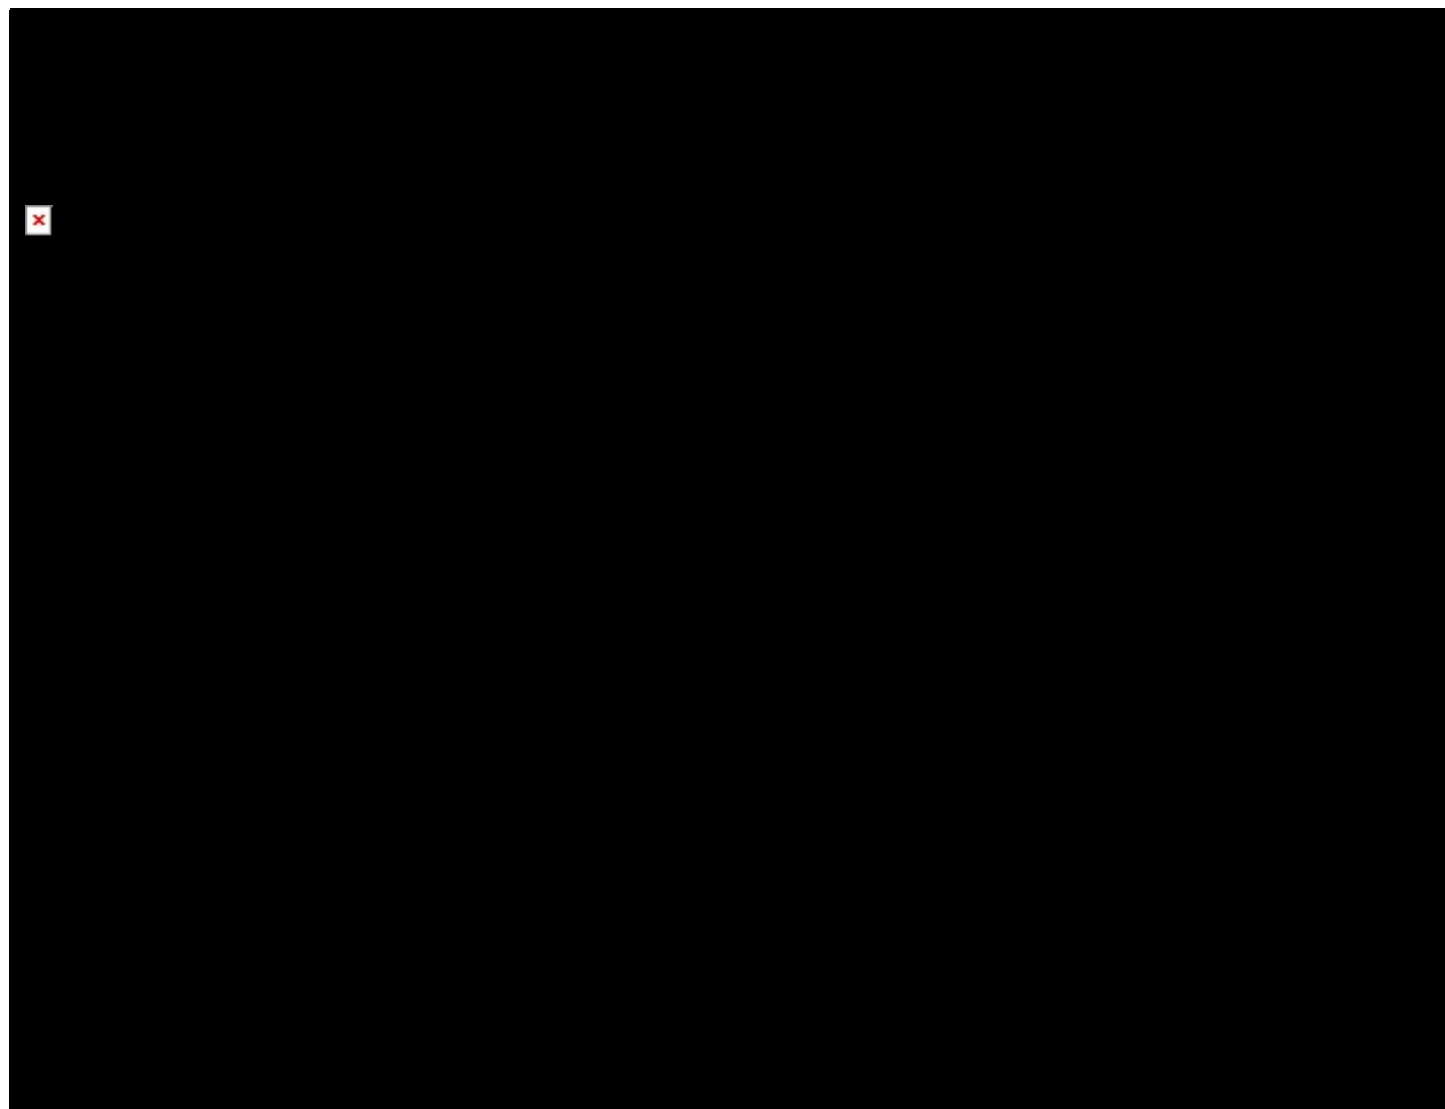

| Tracing Data |                               |                           |                               |
|--------------|-------------------------------|---------------------------|-------------------------------|
| Tracer:      | Wound Area (px <sup>2</sup> ) | Ruler Calibration (px/cm) | Wound Area (cm <sup>2</sup> ) |
| H1           | 19330                         | 160.5                     | 0.75                          |
| H2           | 2300                          | 159.9                     | 0.09                          |
| AI           | 12292                         | 175.3                     | 0.40                          |

| Tracing Comparisons     |                     |                     |                     |                     |
|-------------------------|---------------------|---------------------|---------------------|---------------------|
| Difference Metric:      | Human-Human         |                     | Human-AI            |                     |
|                         | H1(ref)<br>H2(test) | H2(ref)<br>H1(test) | H1(ref)<br>AI(test) | H2(ref)<br>AI(test) |
| False Negative Area (%) | 89.5                | 11.6                | 44.5                | 24.8                |
| False Positive Area (%) | 1.4                 | 752.0               | 8.1                 | 459.2               |
| Relative Error (%)      | 88.1                | 740.4               | 36.4                | 434.4               |

| Blinded Attending Surgeon Review |              |                      |                      |                      |              |                         |
|----------------------------------|--------------|----------------------|----------------------|----------------------|--------------|-------------------------|
| Reviewer                         | PGT Estimate | H1 meets definition? | H2 meets definition? | AI meets definition? | Which is AI? | Which is most accurate? |
| 1                                | healed       | No                   | No                   | No                   | AI           | None                    |
| 2                                | 0            | No                   | No                   | Yes                  | AI           | H1                      |
| 3                                | 10           | No                   | No                   | Yes                  | H1           | H1                      |

| Wound EMR Information |        |     |            |                |                   |                  |                  |                               |
|-----------------------|--------|-----|------------|----------------|-------------------|------------------|------------------|-------------------------------|
| Sequential Number     | Gender | Age | Wound Type | Wound Location | Wound Length (cm) | Wound Width (cm) | Wound Depth (cm) | Wound Area (cm <sup>2</sup> ) |
| 20                    | F      | 72  | VLU        | LLE lat        | 7.0               | 6.8              | 0.4              | 47.60                         |

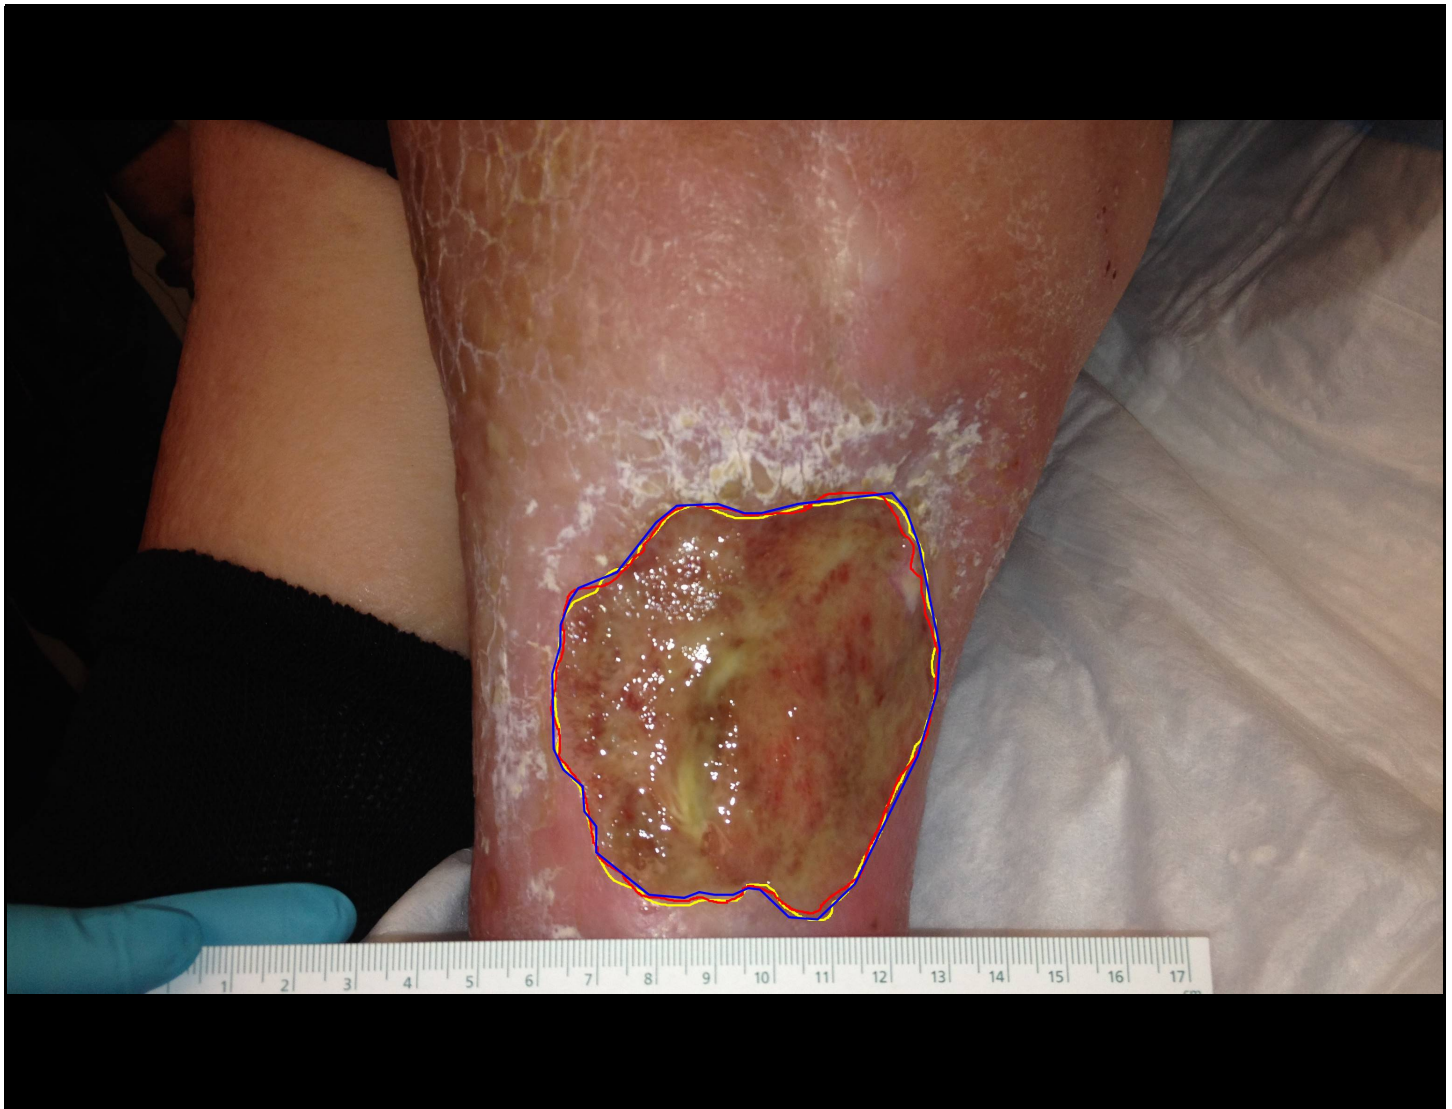

| Tracing Data |                               |                           |                               |
|--------------|-------------------------------|---------------------------|-------------------------------|
| Tracer:      | Wound Area (px <sup>2</sup> ) | Ruler Calibration (px/cm) | Wound Area (cm <sup>2</sup> ) |
| H1           | 649860                        | 134.7                     | 35.82                         |
| H2           | 643550                        | 132.0                     | 36.94                         |
| AI           | 659952                        | 139.5                     | 33.90                         |

| Tracing Comparisons     |                     |                     |                     |                     |
|-------------------------|---------------------|---------------------|---------------------|---------------------|
| Difference Metric:      | Human-Human         |                     | Human-AI            |                     |
|                         | H1(ref)<br>H2(test) | H2(ref)<br>H1(test) | H1(ref)<br>AI(test) | H2(ref)<br>AI(test) |
| False Negative Area (%) | 2.3                 | 1.4                 | 1.1                 | 0.9                 |
| False Positive Area (%) | 1.4                 | 2.4                 | 2.6                 | 3.4                 |
| Relative Error (%)      | 1.0                 | 1.0                 | 1.6                 | 2.5                 |

| Blinded Attending Surgeon Review |              |                      |                      |                      |              |                         |
|----------------------------------|--------------|----------------------|----------------------|----------------------|--------------|-------------------------|
| Reviewer                         | PGT Estimate | H1 meets definition? | H2 meets definition? | AI meets definition? | Which is AI? | Which is most accurate? |
| 1                                | <10          | Yes                  | Yes                  | Yes                  | AI           | AI                      |
| 2                                | 0            | Yes                  | No                   | No                   | AI           | H2                      |
| 3                                | 30           | Yes                  | Yes                  | Yes                  | H2           | H1                      |

| Wound EMR Information |        |     |            |                |                   |                  |                  |                               |
|-----------------------|--------|-----|------------|----------------|-------------------|------------------|------------------|-------------------------------|
| Sequential Number     | Gender | Age | Wound Type | Wound Location | Wound Length (cm) | Wound Width (cm) | Wound Depth (cm) | Wound Area (cm <sup>2</sup> ) |
| 21                    | F      | 73  | PU         | R ischium      | 1.6               | 7.2              | 2.4              | 11.52                         |

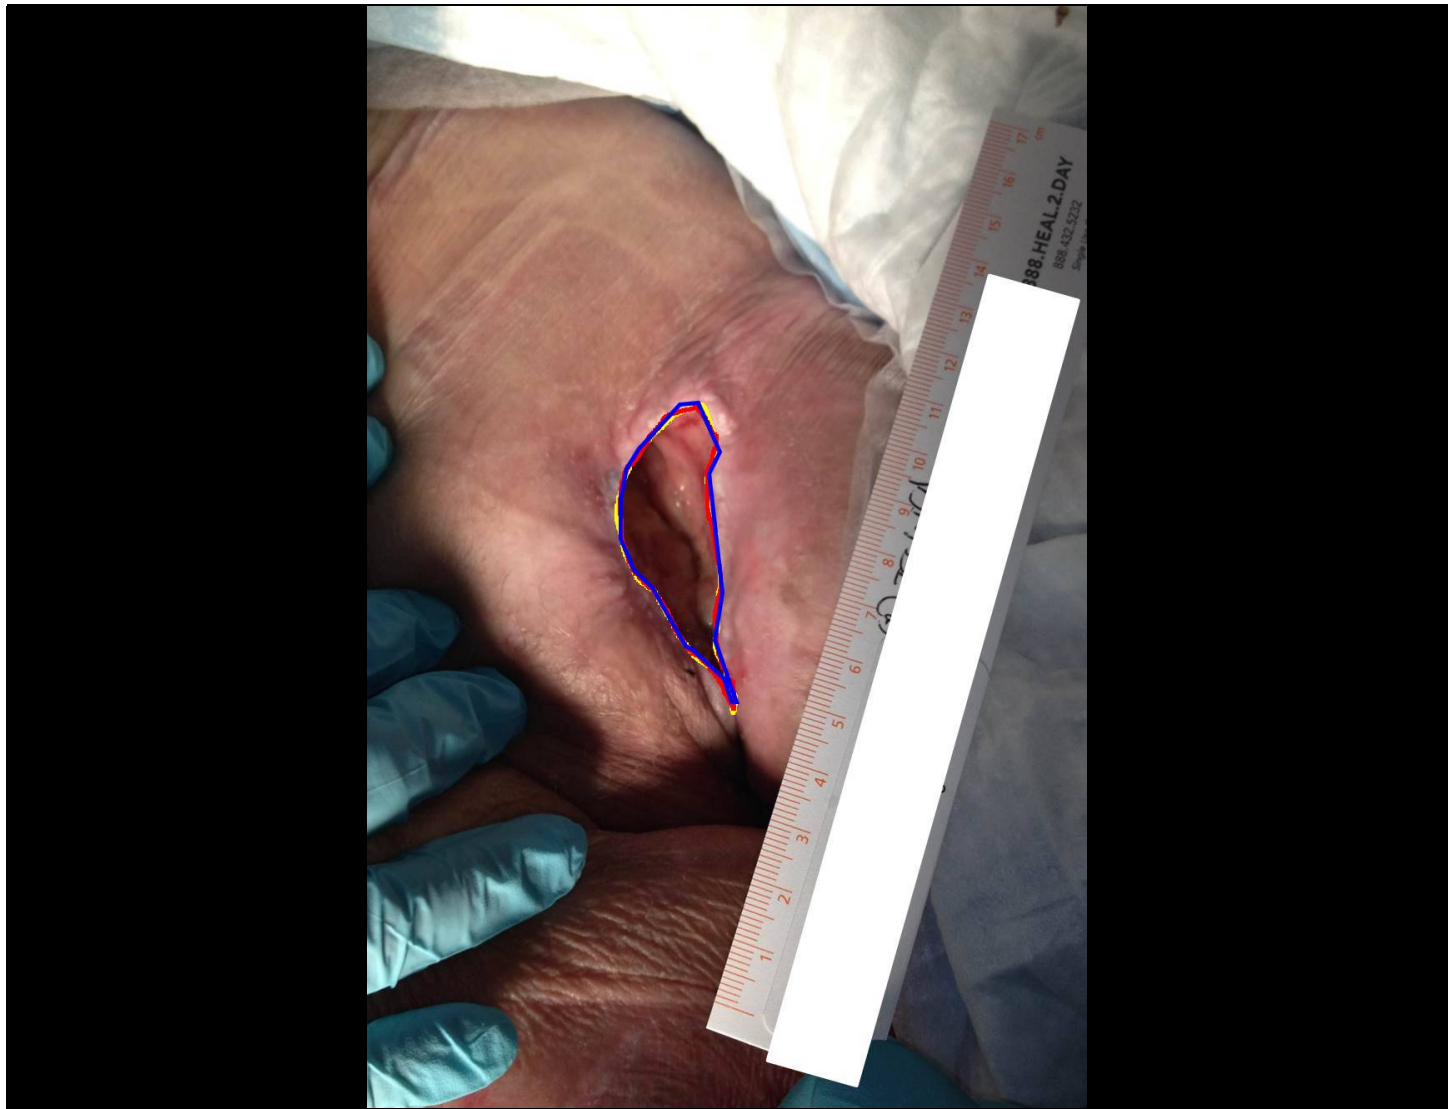

| Tracing Data |                               |                           |                               |
|--------------|-------------------------------|---------------------------|-------------------------------|
| Tracer:      | Wound Area (px <sup>2</sup> ) | Ruler Calibration (px/cm) | Wound Area (cm <sup>2</sup> ) |
| H1           | 25879                         | 69.4                      | 5.38                          |
| H2           | 25220                         | 65.8                      | 5.82                          |
| AI           | 25864                         | 61.7                      | 6.80                          |

| Tracing Comparisons     |                     |                     |                     |                     |
|-------------------------|---------------------|---------------------|---------------------|---------------------|
| Difference Metric:      | Human-Human         |                     | Human-AI            |                     |
|                         | H1(ref)<br>H2(test) | H2(ref)<br>H1(test) | H1(ref)<br>AI(test) | H2(ref)<br>AI(test) |
| False Negative Area (%) | 4.1                 | 1.6                 | 3.1                 | 2.1                 |
| False Positive Area (%) | 1.6                 | 4.2                 | 3.0                 | 4.7                 |
| Relative Error (%)      | 2.5                 | 2.6                 | 0.1                 | 2.6                 |

| Blinded Attending Surgeon Review |              |                      |                      |                      |              |                         |
|----------------------------------|--------------|----------------------|----------------------|----------------------|--------------|-------------------------|
| Reviewer                         | PGT Estimate | H1 meets definition? | H2 meets definition? | AI meets definition? | Which is AI? | Which is most accurate? |
| 1                                | 0            | Yes                  | Yes                  | Yes                  | AI           | H1                      |
| 2                                | 0            | Yes                  | Yes                  | Yes                  | H2           | H1                      |
| 3                                | 10           | Yes                  | Yes                  | Yes                  | H2           | H1                      |

| Wound EMR Information |        |     |            |                |                   |                  |                  |                               |
|-----------------------|--------|-----|------------|----------------|-------------------|------------------|------------------|-------------------------------|
| Sequential Number     | Gender | Age | Wound Type | Wound Location | Wound Length (cm) | Wound Width (cm) | Wound Depth (cm) | Wound Area (cm <sup>2</sup> ) |
| 22                    | M      | 64  | DFU        | L 2nd toe      | 3.0               | 2.0              | 0.1              | 6.00                          |

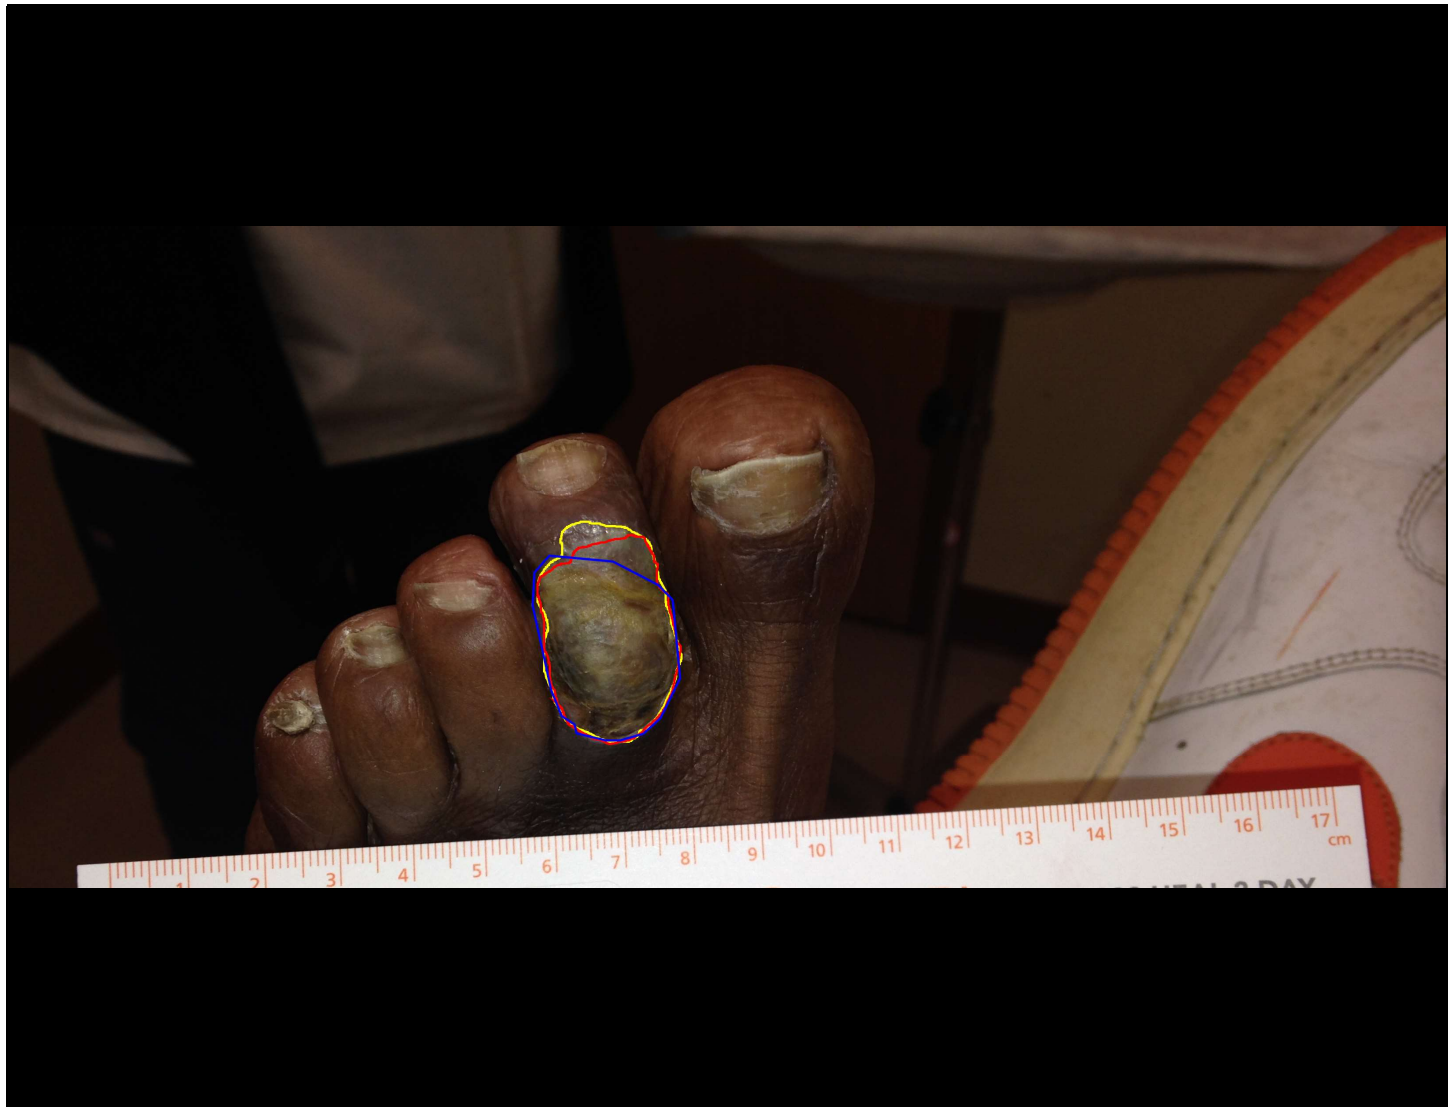

| Tracing Data |                               |                           |                               |
|--------------|-------------------------------|---------------------------|-------------------------------|
| Tracer:      | Wound Area (px <sup>2</sup> ) | Ruler Calibration (px/cm) | Wound Area (cm <sup>2</sup> ) |
| H1           | 122306                        | 157.5                     | 4.93                          |
| H2           | 113971                        | 157.5                     | 4.59                          |
| AI           | 109612                        | 159.7                     | 4.30                          |

| Tracing Comparisons     |                     |                     |                     |                     |
|-------------------------|---------------------|---------------------|---------------------|---------------------|
| Difference Metric:      | Human-Human         |                     | Human-AI            |                     |
|                         | H1(ref)<br>H2(test) | H2(ref)<br>H1(test) | H1(ref)<br>AI(test) | H2(ref)<br>AI(test) |
| False Negative Area (%) | 8.2                 | 1.4                 | 15.2                | 9.5                 |
| False Positive Area (%) | 1.3                 | 8.8                 | 4.8                 | 5.7                 |
| Relative Error (%)      | 6.8                 | 7.3                 | 10.4                | 3.8                 |

| Blinded Attending Surgeon Review |              |                      |                      |                      |              |                         |
|----------------------------------|--------------|----------------------|----------------------|----------------------|--------------|-------------------------|
| Reviewer                         | PGT Estimate | H1 meets definition? | H2 meets definition? | AI meets definition? | Which is AI? | Which is most accurate? |
| 1                                | 0            | Yes                  | No                   | No                   | H1           | AI                      |
| 2                                | 0            | No                   | No                   | Yes                  | AI           | H2                      |
| 3                                | 0            | No                   | No                   | No                   | H2           | H2                      |



| Wound EMR Information |        |     |            |                |                   |                  |                  |                               |
|-----------------------|--------|-----|------------|----------------|-------------------|------------------|------------------|-------------------------------|
| Sequential Number     | Gender | Age | Wound Type | Wound Location | Wound Length (cm) | Wound Width (cm) | Wound Depth (cm) | Wound Area (cm <sup>2</sup> ) |
| 23                    | F      | 70  | VLU        | R med ankle    | 1.8               | 2.0              | 0.2              | 3.60                          |

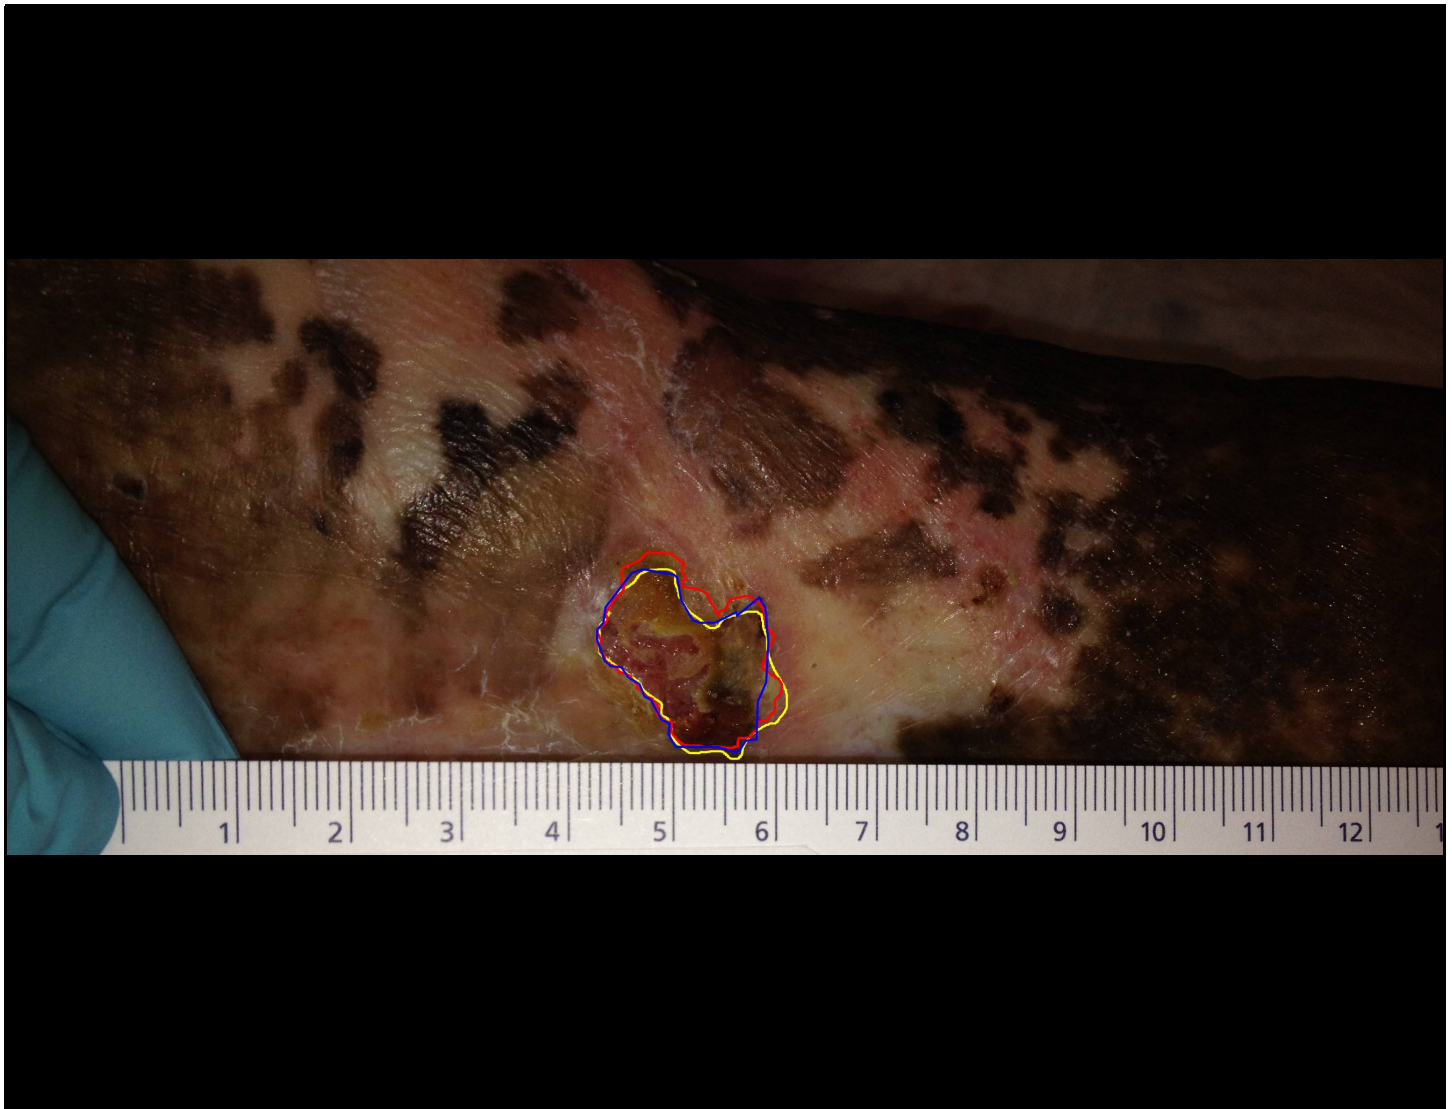

| Tracing Data |                               |                           |                               |
|--------------|-------------------------------|---------------------------|-------------------------------|
| Tracer:      | Wound Area (px <sup>2</sup> ) | Ruler Calibration (px/cm) | Wound Area (cm <sup>2</sup> ) |
| H1           | 106513                        | 237.4                     | 1.89                          |
| H2           | 116433                        | 233.0                     | 2.15                          |
| AI           | 103069                        | 253.8                     | 1.60                          |

| Tracing Comparisons     |                     |                     |                     |                     |
|-------------------------|---------------------|---------------------|---------------------|---------------------|
| Difference Metric:      | Human-Human         |                     | Human-AI            |                     |
|                         | H1(ref)<br>H2(test) | H2(ref)<br>H1(test) | H1(ref)<br>AI(test) | H2(ref)<br>AI(test) |
| False Negative Area (%) | 5.8                 | 13.8                | 8.4                 | 14.4                |
| False Positive Area (%) | 15.1                | 5.3                 | 5.2                 | 3.0                 |
| Relative Error (%)      | 9.3                 | 8.5                 | 3.2                 | 11.5                |

| Blinded Attending Surgeon Review |              |                      |                      |                      |              |                         |
|----------------------------------|--------------|----------------------|----------------------|----------------------|--------------|-------------------------|
| Reviewer                         | PGT Estimate | H1 meets definition? | H2 meets definition? | AI meets definition? | Which is AI? | Which is most accurate? |
| 1                                | 90           | No                   | No                   | No                   | AI           | 0                       |
| 2                                | 30           | No                   | No                   | No                   | H1           | H2                      |
| 3                                | 30           | Yes                  | Yes                  | Yes                  | H1           | AI                      |

| Wound EMR Information |        |     |            |                |                   |                  |                  |                               |
|-----------------------|--------|-----|------------|----------------|-------------------|------------------|------------------|-------------------------------|
| Sequential Number     | Gender | Age | Wound Type | Wound Location | Wound Length (cm) | Wound Width (cm) | Wound Depth (cm) | Wound Area (cm <sup>2</sup> ) |
| 24                    | M      | 92  | VLU        | LLE lat        | 8.6               | 7.5              | 0.2              | 64.50                         |

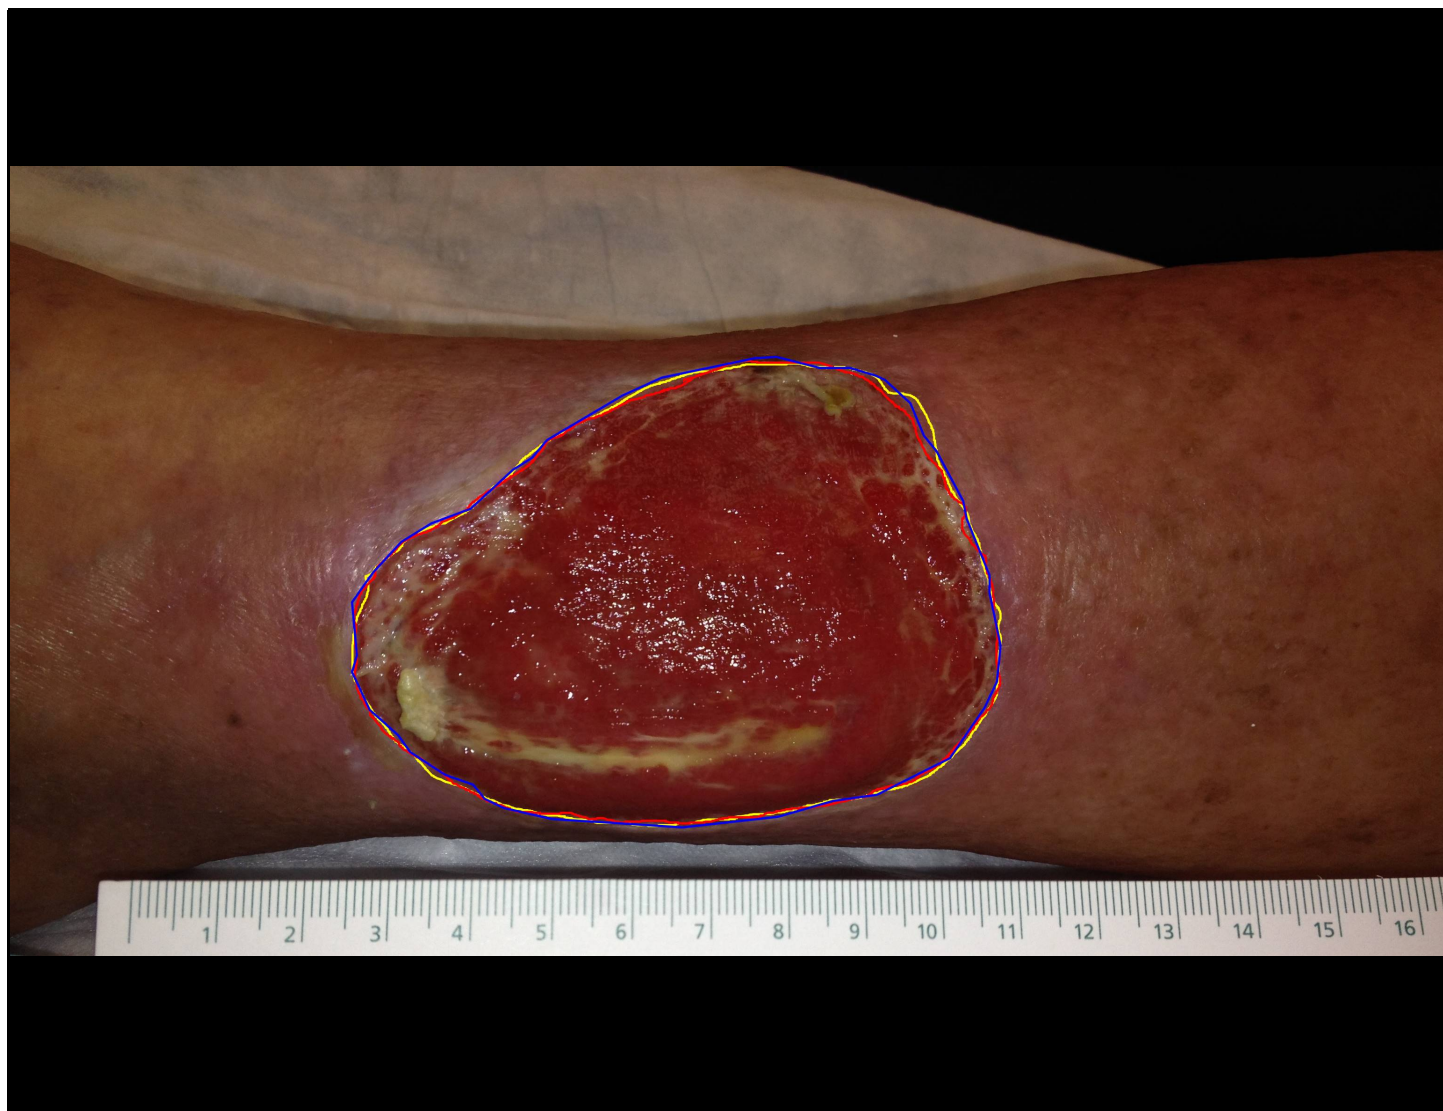

| Tracing Data |                               |                           |                               |
|--------------|-------------------------------|---------------------------|-------------------------------|
| Tracer:      | Wound Area (px <sup>2</sup> ) | Ruler Calibration (px/cm) | Wound Area (cm <sup>2</sup> ) |
| H1           | 1173731                       | 182.7                     | 35.18                         |
| H2           | 1157291                       | 178.0                     | 36.53                         |
| AI           | 1176966                       | 192.4                     | 31.80                         |

| Tracing Comparisons     |                     |                     |                     |                     |
|-------------------------|---------------------|---------------------|---------------------|---------------------|
| Difference Metric:      | Human-Human         |                     | Human-AI            |                     |
|                         | H1(ref)<br>H2(test) | H2(ref)<br>H1(test) | H1(ref)<br>AI(test) | H2(ref)<br>AI(test) |
| False Negative Area (%) | 2.0                 | 0.6                 | 1.0                 | 0.6                 |
| False Positive Area (%) | 0.6                 | 2.0                 | 1.3                 | 2.3                 |
| Relative Error (%)      | 1.4                 | 1.4                 | 0.3                 | 1.7                 |

| Blinded Attending Surgeon Review |              |                      |                      |                      |              |                         |
|----------------------------------|--------------|----------------------|----------------------|----------------------|--------------|-------------------------|
| Reviewer                         | PGT Estimate | H1 meets definition? | H2 meets definition? | AI meets definition? | Which is AI? | Which is most accurate? |
| 1                                | 90           | Yes                  | Yes                  | Yes                  | H1           | AI                      |
| 2                                | 80           | Yes                  | Yes                  | Yes                  | AI           | H2                      |
| 3                                | 100          | Yes                  | Yes                  | Yes                  | AI           | H1                      |

| Wound EMR Information |        |     |            |                |                   |                  |                  |                               |
|-----------------------|--------|-----|------------|----------------|-------------------|------------------|------------------|-------------------------------|
| Sequential Number     | Gender | Age | Wound Type | Wound Location | Wound Length (cm) | Wound Width (cm) | Wound Depth (cm) | Wound Area (cm <sup>2</sup> ) |
| 25                    | M      | 53  | DFU        | L plantar      | 1.8               | 1.7              | 0.2              | 3.06                          |

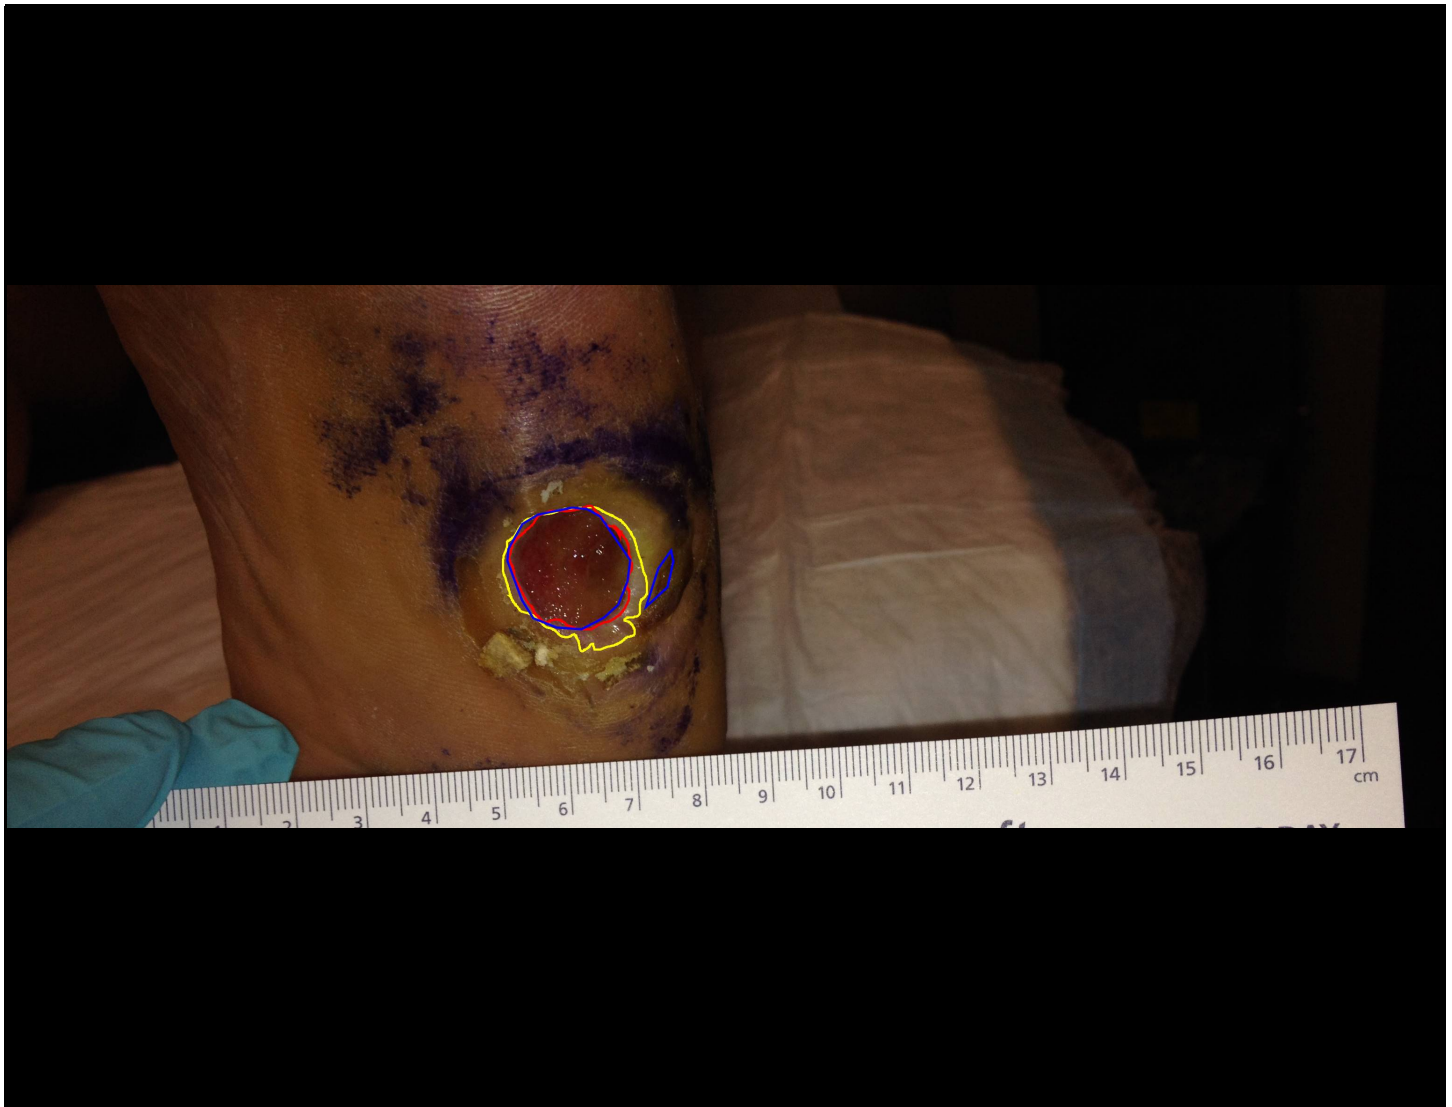

| Tracing Data |                               |                           |                               |
|--------------|-------------------------------|---------------------------|-------------------------------|
| Tracer:      | Wound Area (px <sup>2</sup> ) | Ruler Calibration (px/cm) | Wound Area (cm <sup>2</sup> ) |
| H1           | 78726                         | 151.5                     | 3.43                          |
| H2           | 58405                         | 152.3                     | 2.52                          |
| AI           | 60611                         | 155.7                     | 2.50                          |

| Tracing Comparisons     |                     |                     |                     |                     |
|-------------------------|---------------------|---------------------|---------------------|---------------------|
| Difference Metric:      | Human-Human         |                     | Human-AI            |                     |
|                         | H1(ref)<br>H2(test) | H2(ref)<br>H1(test) | H1(ref)<br>AI(test) | H2(ref)<br>AI(test) |
| False Negative Area (%) | 26.0                | 0.3                 | 26.8                | 6.1                 |
| False Positive Area (%) | 0.2                 | 35.1                | 3.8                 | 9.9                 |
| Relative Error (%)      | 25.8                | 34.8                | 23.0                | 3.8                 |

| Blinded Attending Surgeon Review |              |                      |                      |                      |              |                         |
|----------------------------------|--------------|----------------------|----------------------|----------------------|--------------|-------------------------|
| Reviewer                         | PGT Estimate | H1 meets definition? | H2 meets definition? | AI meets definition? | Which is AI? | Which is most accurate? |
| 1                                | 100          | No                   | Yes                  | Yes                  | H1           | H1                      |
| 2                                | 50           | No                   | Yes                  | No                   | H2           | H1                      |
| 3                                | 90           | No                   | Yes                  | No                   | H2           | H1                      |

| Wound EMR Information |        |     |            |                |                   |                  |                  |                               |
|-----------------------|--------|-----|------------|----------------|-------------------|------------------|------------------|-------------------------------|
| Sequential Number     | Gender | Age | Wound Type | Wound Location | Wound Length (cm) | Wound Width (cm) | Wound Depth (cm) | Wound Area (cm <sup>2</sup> ) |
| 26                    | M      | 49  | DFU        | L plantar      | 0.2               | 0.1              | 0.1              | 0.02                          |

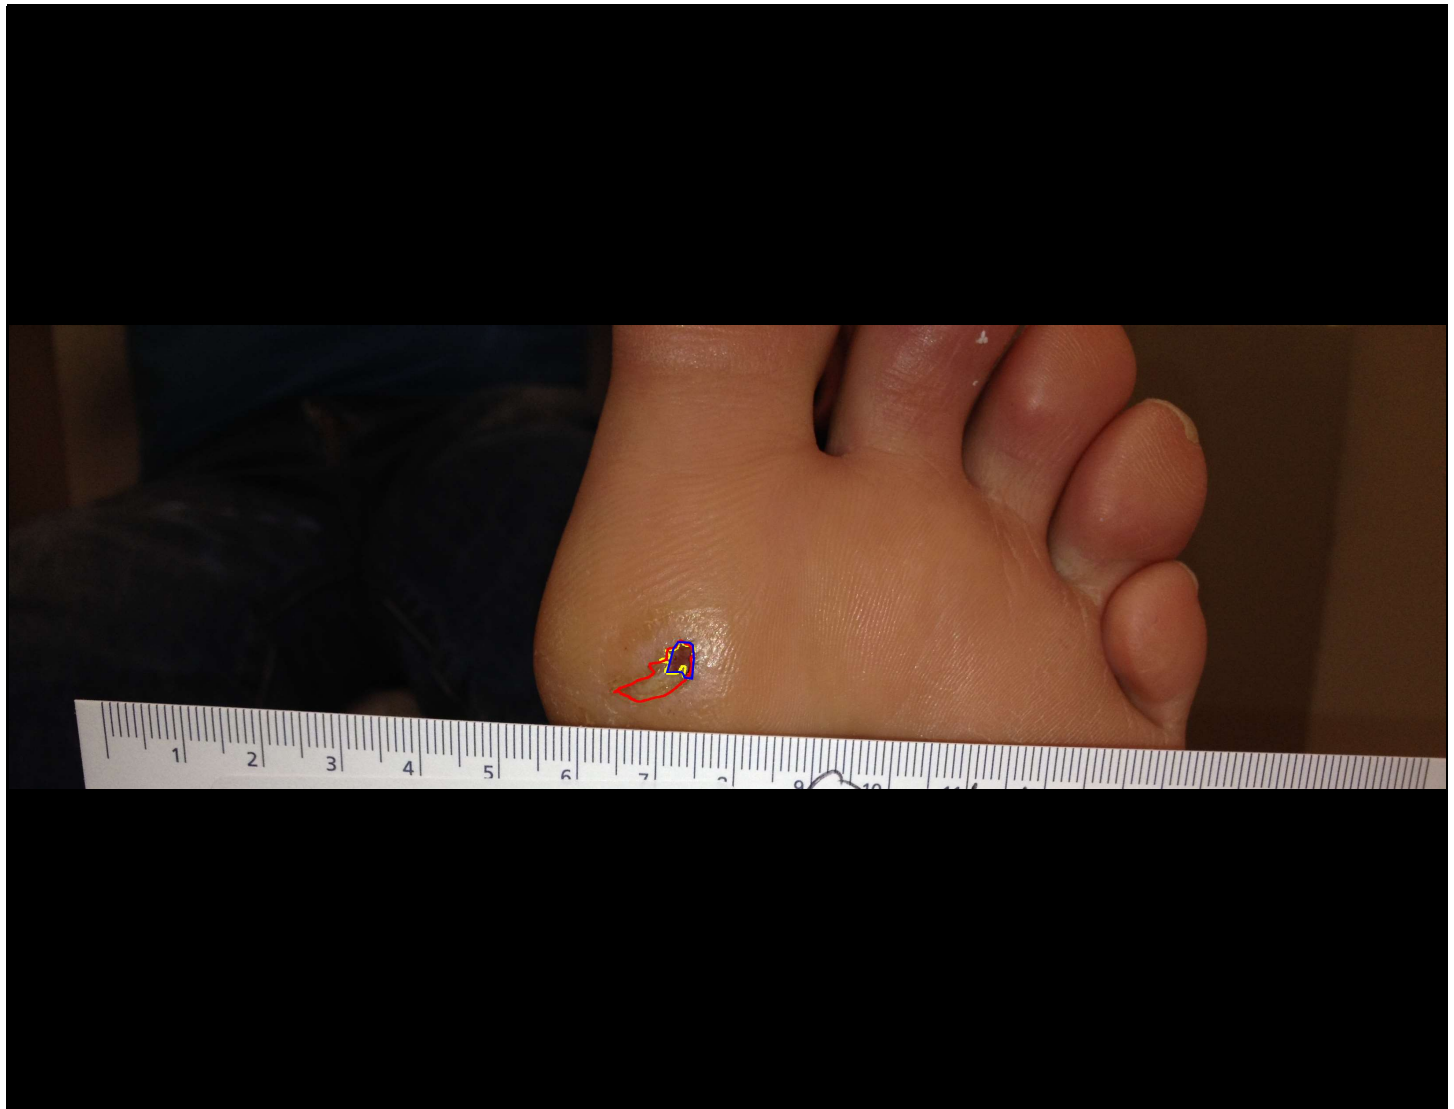

| Tracing Data |                               |                           |                               |
|--------------|-------------------------------|---------------------------|-------------------------------|
| Tracer:      | Wound Area (px <sup>2</sup> ) | Ruler Calibration (px/cm) | Wound Area (cm <sup>2</sup> ) |
| H1           | 3623                          | 181.5                     | 0.11                          |
| H2           | 10654                         | 178.3                     | 0.34                          |
| AI           | 3694                          | 192.2                     | 0.10                          |

| Tracing Comparisons     |                     |                     |                     |                     |
|-------------------------|---------------------|---------------------|---------------------|---------------------|
| Difference Metric:      | Human-Human         |                     | Human-AI            |                     |
|                         | H1(ref)<br>H2(test) | H2(ref)<br>H1(test) | H1(ref)<br>AI(test) | H2(ref)<br>AI(test) |
| False Negative Area (%) | 6.1                 | 68.1                | 16.0                | 70.0                |
| False Positive Area (%) | 200.2               | 2.1                 | 17.9                | 4.7                 |
| Relative Error (%)      | 194.1               | 66.0                | 2.0                 | 65.3                |

| Blinded Attending Surgeon Review |              |                      |                      |                      |              |                         |
|----------------------------------|--------------|----------------------|----------------------|----------------------|--------------|-------------------------|
| Reviewer                         | PGT Estimate | H1 meets definition? | H2 meets definition? | AI meets definition? | Which is AI? | Which is most accurate? |
| 1                                | 0            | No                   | Yes                  | No                   | AI           | H2                      |
| 2                                |              | Yes                  | No                   | Yes                  | AI           | 0                       |
| 3                                | 30           | Yes                  | No                   | Yes                  | H1           | AI                      |

| Wound EMR Information |        |     |            |                |                   |                  |                  |                               |
|-----------------------|--------|-----|------------|----------------|-------------------|------------------|------------------|-------------------------------|
| Sequential Number     | Gender | Age | Wound Type | Wound Location | Wound Length (cm) | Wound Width (cm) | Wound Depth (cm) | Wound Area (cm <sup>2</sup> ) |
| 27                    | F      | 84  | VLU        | LLE medial     | 5.1               | 5.0              | 0.2              | 25.50                         |

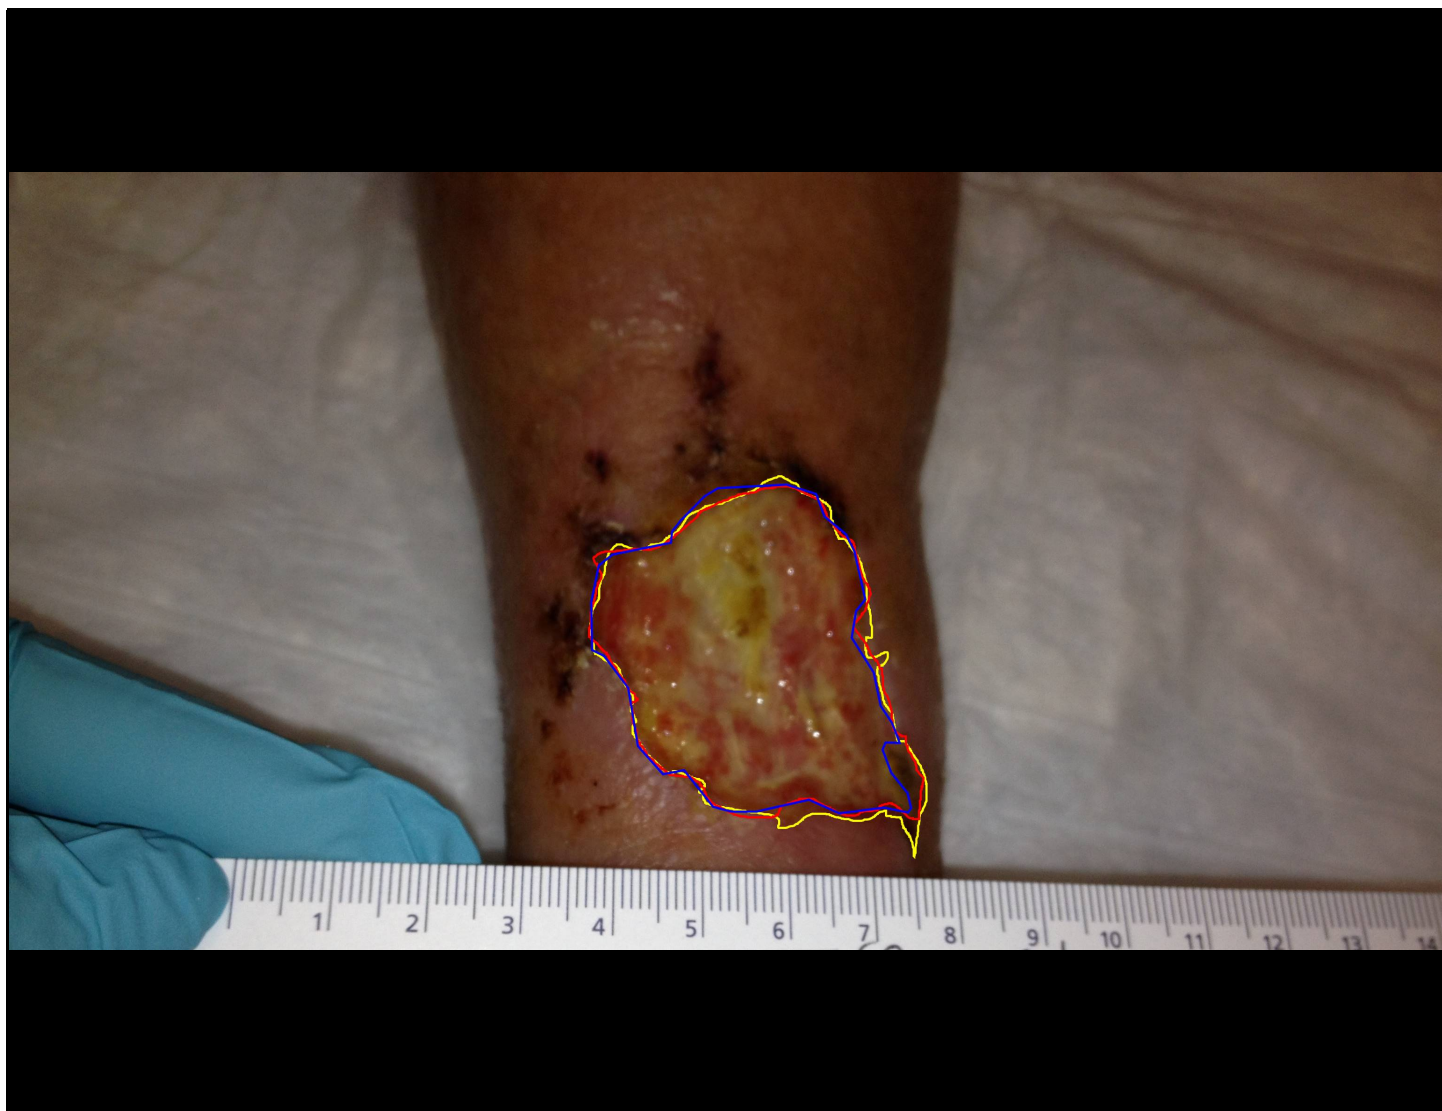

| Tracing Data |                               |                           |                               |
|--------------|-------------------------------|---------------------------|-------------------------------|
| Tracer:      | Wound Area (px <sup>2</sup> ) | Ruler Calibration (px/cm) | Wound Area (cm <sup>2</sup> ) |
| H1           | 400606                        | 201.5                     | 9.87                          |
| H2           | 387807                        | 198.2                     | 9.88                          |
| AI           | 380006                        | 205.5                     | 9.00                          |

| Tracing Comparisons     |                     |                     |                     |                     |
|-------------------------|---------------------|---------------------|---------------------|---------------------|
| Difference Metric:      | Human-Human         |                     | Human-AI            |                     |
|                         | H1(ref)<br>H2(test) | H2(ref)<br>H1(test) | H1(ref)<br>AI(test) | H2(ref)<br>AI(test) |
| False Negative Area (%) | 4.7                 | 1.5                 | 7.2                 | 4.5                 |
| False Positive Area (%) | 1.5                 | 4.8                 | 2.1                 | 2.5                 |
| Relative Error (%)      | 3.2                 | 3.3                 | 5.1                 | 2.0                 |

| Blinded Attending Surgeon Review |              |                      |                      |                      |              |                         |
|----------------------------------|--------------|----------------------|----------------------|----------------------|--------------|-------------------------|
| Reviewer                         | PGT Estimate | H1 meets definition? | H2 meets definition? | AI meets definition? | Which is AI? | Which is most accurate? |
| 1                                | 20           | Yes                  | Yes                  | No                   | H1           | H1                      |
| 2                                | 20           | Yes                  | Yes                  | Yes                  | AI           | AI                      |
| 3                                | 60           | Yes                  | No                   | No                   | H2           | AI                      |

| Wound EMR Information |        |     |            |                |                   |                  |                  |                               |
|-----------------------|--------|-----|------------|----------------|-------------------|------------------|------------------|-------------------------------|
| Sequential Number     | Gender | Age | Wound Type | Wound Location | Wound Length (cm) | Wound Width (cm) | Wound Depth (cm) | Wound Area (cm <sup>2</sup> ) |
| 28                    | F      | 76  | blister    | RLE med        | 4.7               | 3.5              |                  | 16.45                         |

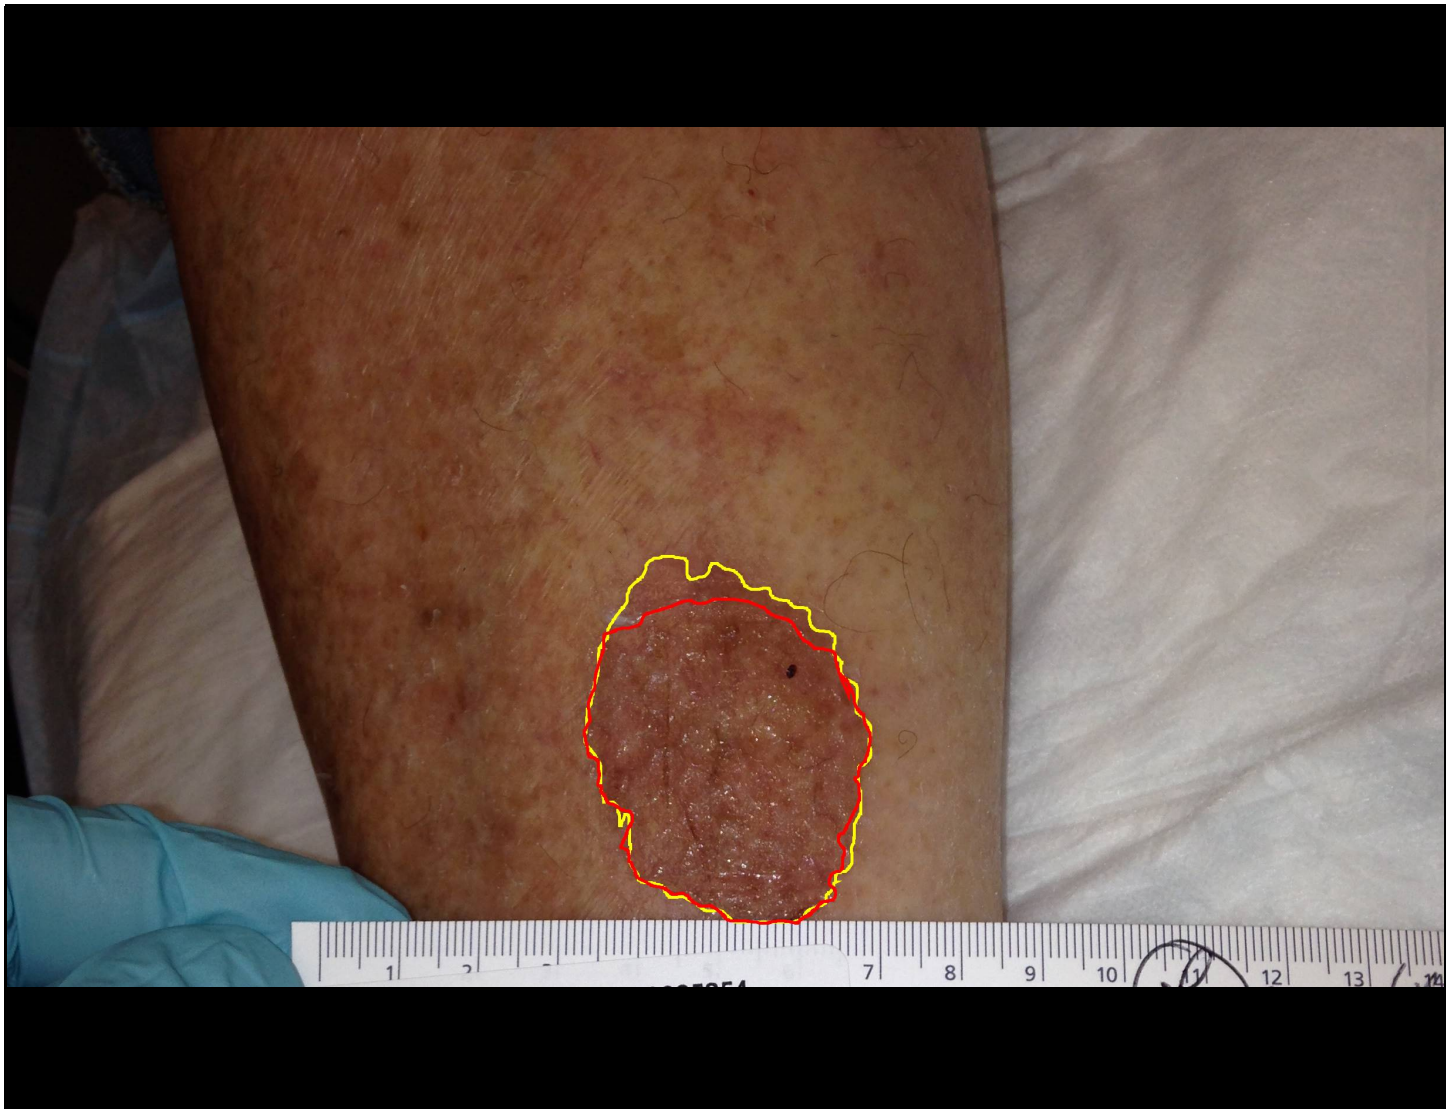

| Tracing Data |                               |                           |                               |
|--------------|-------------------------------|---------------------------|-------------------------------|
| Tracer:      | Wound Area (px <sup>2</sup> ) | Ruler Calibration (px/cm) | Wound Area (cm <sup>2</sup> ) |
| H1           | 223618                        | 137.4                     | 11.85                         |
| H2           | 202132                        | 135.0                     | 11.09                         |
| AI           | 0                             |                           | 0.00                          |

| Tracing Comparisons     |                     |                     |                     |                     |
|-------------------------|---------------------|---------------------|---------------------|---------------------|
| Difference Metric:      | Human-Human         |                     | Human-AI            |                     |
|                         | H1(ref)<br>H2(test) | H2(ref)<br>H1(test) | H1(ref)<br>AI(test) | H2(ref)<br>AI(test) |
| False Negative Area (%) | 10.3                | 0.8                 |                     |                     |
| False Positive Area (%) | 0.7                 | 11.4                |                     |                     |
| Relative Error (%)      | 9.6                 | 10.6                |                     |                     |

| Blinded Attending Surgeon Review |              |                      |                      |                      |              |                         |
|----------------------------------|--------------|----------------------|----------------------|----------------------|--------------|-------------------------|
| Reviewer                         | PGT Estimate | H1 meets definition? | H2 meets definition? | AI meets definition? | Which is AI? | Which is most accurate? |
| 1                                | 0            | Yes                  | Yes                  | Yes                  | 0            | 0                       |
| 2                                | healed       | No                   | No                   | Yes                  | AI           | H2                      |
| 3                                | 0            | No                   | Yes                  | Yes                  | AI           | H2                      |

| Wound EMR Information |        |     |            |                |                   |                  |                  |                               |
|-----------------------|--------|-----|------------|----------------|-------------------|------------------|------------------|-------------------------------|
| Sequential Number     | Gender | Age | Wound Type | Wound Location | Wound Length (cm) | Wound Width (cm) | Wound Depth (cm) | Wound Area (cm <sup>2</sup> ) |
| 29                    | M      | 59  | DFU        | L 2nd toe      | 2.0               | 2.0              | 0.1              | 4.00                          |

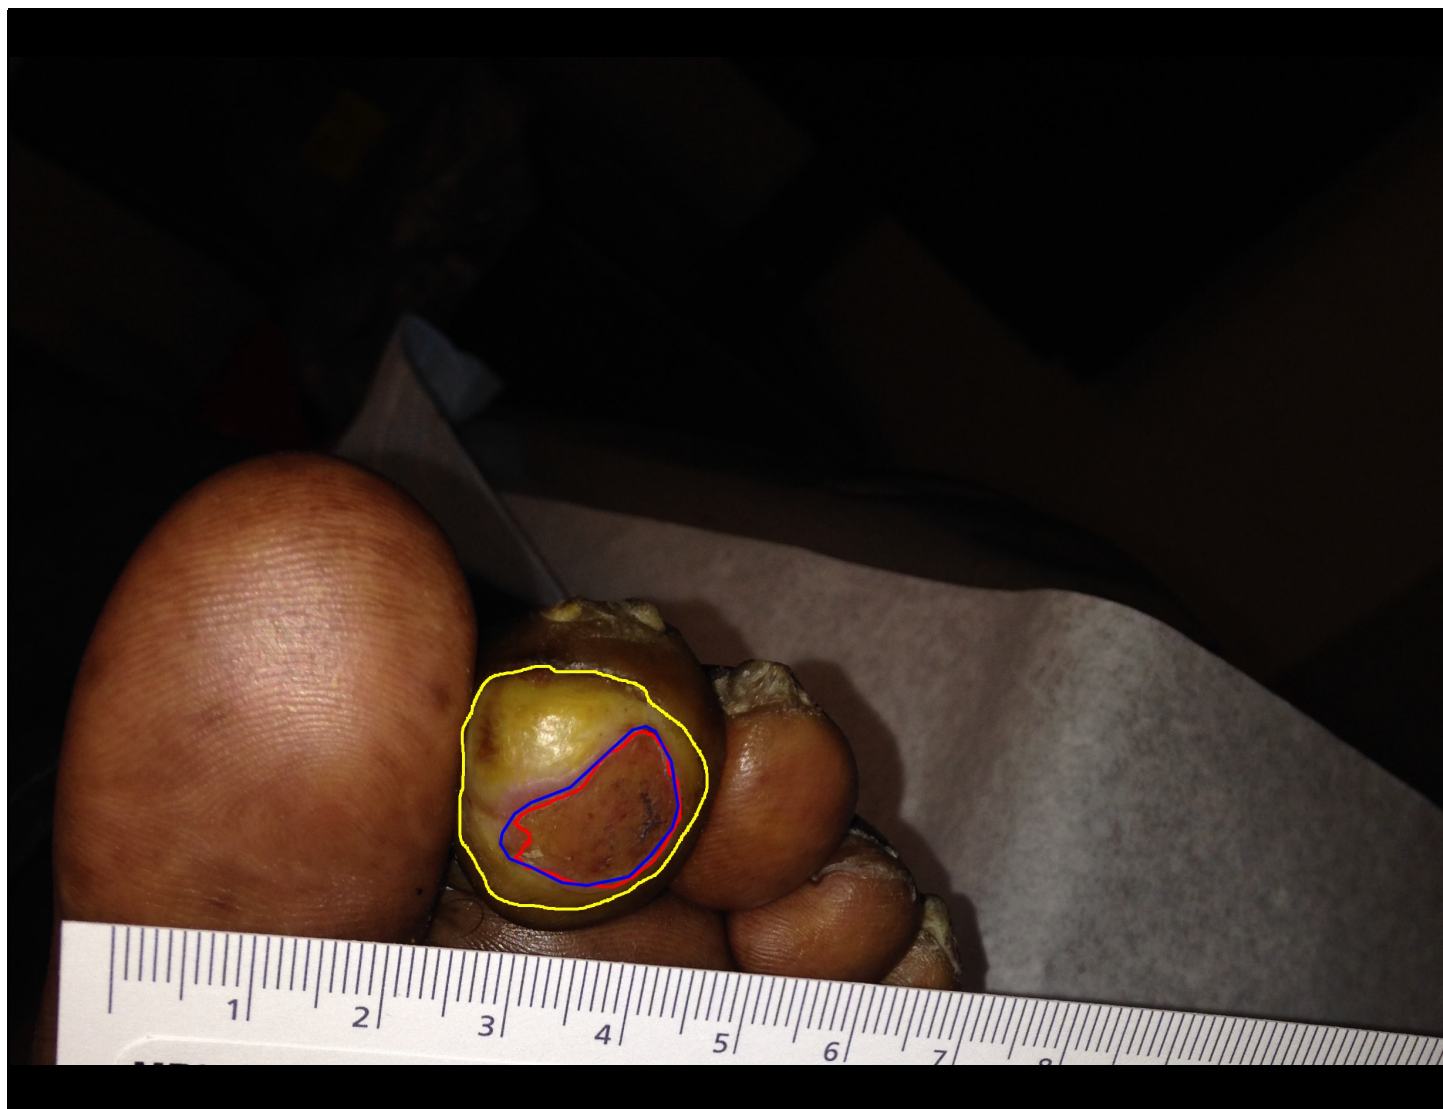

| Tracing Data |                               |                           |                               |
|--------------|-------------------------------|---------------------------|-------------------------------|
| Tracer:      | Wound Area (px <sup>2</sup> ) | Ruler Calibration (px/cm) | Wound Area (cm <sup>2</sup> ) |
| H1           | 137280                        | 207.4                     | 3.19                          |
| H2           | 45583                         | 206.2                     | 1.07                          |
| AI           | 49227                         | 233.9                     | 0.90                          |

| Tracing Comparisons     |                     |                     |                     |                     |
|-------------------------|---------------------|---------------------|---------------------|---------------------|
| Difference Metric:      | Human-Human         |                     | Human-AI            |                     |
|                         | H1(ref)<br>H2(test) | H2(ref)<br>H1(test) | H1(ref)<br>AI(test) | H2(ref)<br>AI(test) |
| False Negative Area (%) | 66.8                | 0.1                 | 64.1                | 3.3                 |
| False Positive Area (%) | 0.0                 | 201.3               | 0.0                 | 11.3                |
| Relative Error (%)      | 66.8                | 201.2               | 64.1                | 8.0                 |

| Blinded Attending Surgeon Review |              |                      |                      |                      |              |                         |
|----------------------------------|--------------|----------------------|----------------------|----------------------|--------------|-------------------------|
| Reviewer                         | PGT Estimate | H1 meets definition? | H2 meets definition? | AI meets definition? | Which is AI? | Which is most accurate? |
| 1                                | 20           | No                   | Yes                  | Yes                  | AI           | H2                      |
| 2                                | 0            | No                   | Yes                  | Yes                  | H2           | H1                      |
| 3                                | 40           | No                   | Yes                  | Yes                  | AI           | H2                      |

| Wound EMR Information |        |     |            |                |                   |                  |                  |                               |
|-----------------------|--------|-----|------------|----------------|-------------------|------------------|------------------|-------------------------------|
| Sequential Number     | Gender | Age | Wound Type | Wound Location | Wound Length (cm) | Wound Width (cm) | Wound Depth (cm) | Wound Area (cm <sup>2</sup> ) |
| 30                    | M      | 66  | PU         | R ischium      | 2.0               | 2.5              | 0.8              | 5.00                          |

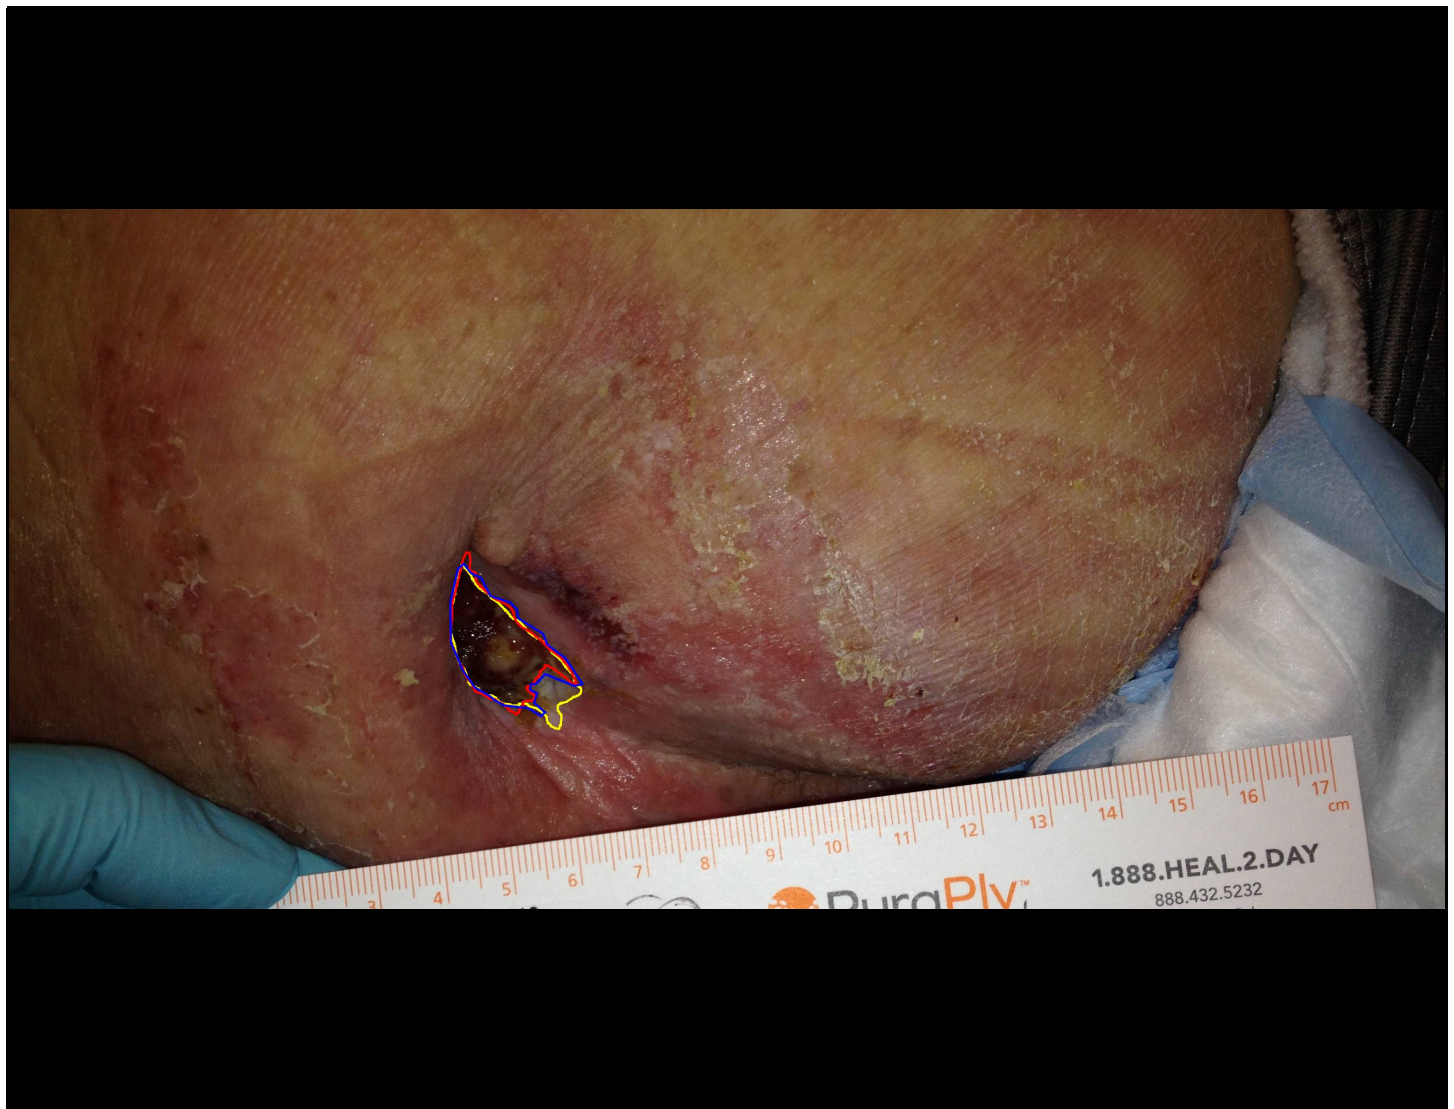

| Tracing Data |                               |                           |                               |
|--------------|-------------------------------|---------------------------|-------------------------------|
| Tracer:      | Wound Area (px <sup>2</sup> ) | Ruler Calibration (px/cm) | Wound Area (cm <sup>2</sup> ) |
| H1           | 50954                         | 150.8                     | 2.24                          |
| H2           | 44714                         | 153.3                     | 1.90                          |
| AI           | 49269                         | 153.2                     | 2.10                          |

| Tracing Comparisons     |                     |                     |                     |                     |
|-------------------------|---------------------|---------------------|---------------------|---------------------|
| Difference Metric:      | Human-Human         |                     | Human-AI            |                     |
|                         | H1(ref)<br>H2(test) | H2(ref)<br>H1(test) | H1(ref)<br>AI(test) | H2(ref)<br>AI(test) |
| False Negative Area (%) | 18.2                | 6.8                 | 13.8                | 2.8                 |
| False Positive Area (%) | 6.0                 | 20.8                | 10.5                | 13.0                |
| Relative Error (%)      | 12.2                | 14.0                | 3.3                 | 10.2                |

| Blinded Attending Surgeon Review |              |                      |                      |                      |              |                         |
|----------------------------------|--------------|----------------------|----------------------|----------------------|--------------|-------------------------|
| Reviewer                         | PGT Estimate | H1 meets definition? | H2 meets definition? | AI meets definition? | Which is AI? | Which is most accurate? |
| 1                                |              | Yes                  | Yes                  | Yes                  | AI           | 0                       |
| 2                                | 0            | No                   | Yes                  | Yes                  | H1           | H1                      |
| 3                                | 80           | No                   | Yes                  | Yes                  | H2           | H2                      |



| Wound EMR Information |        |     |            |                |                   |                  |                  |                               |
|-----------------------|--------|-----|------------|----------------|-------------------|------------------|------------------|-------------------------------|
| Sequential Number     | Gender | Age | Wound Type | Wound Location | Wound Length (cm) | Wound Width (cm) | Wound Depth (cm) | Wound Area (cm <sup>2</sup> ) |
| 31                    | F      | 89  | Trauma     | LLE            | 5.6               | 4.0              | 0.1              | 22.40                         |

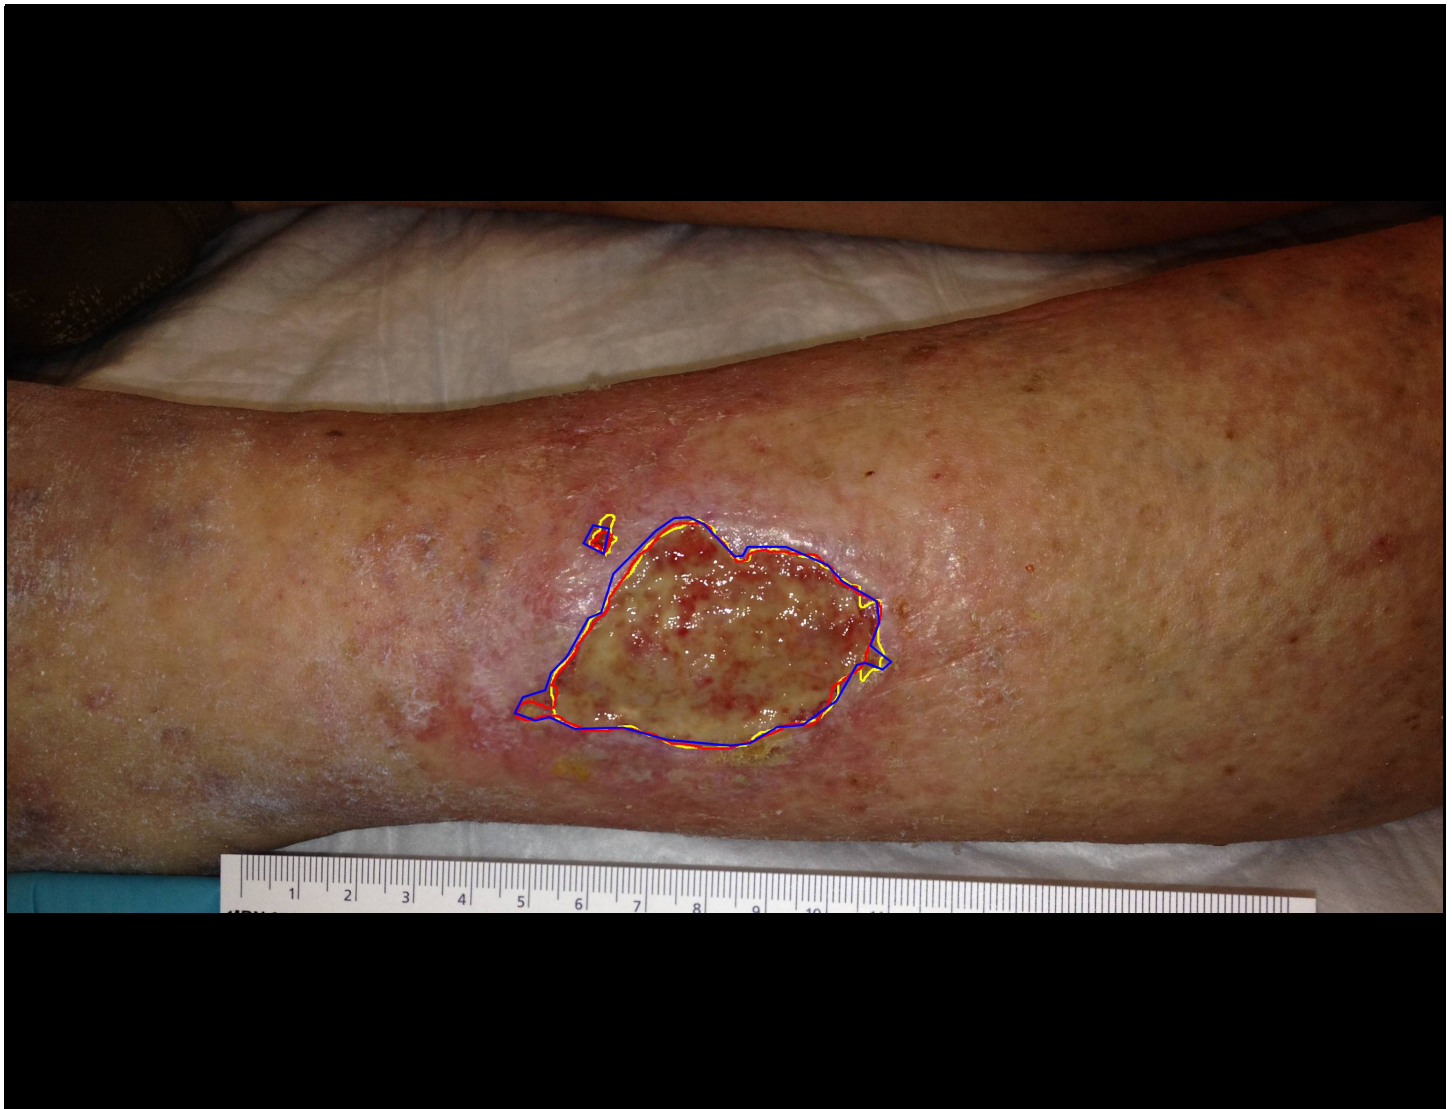

| Tracing Data |                               |                           |                               |
|--------------|-------------------------------|---------------------------|-------------------------------|
| Tracer:      | Wound Area (px <sup>2</sup> ) | Ruler Calibration (px/cm) | Wound Area (cm <sup>2</sup> ) |
| H1           | 262453                        | 134.9                     | 14.42                         |
| H2           | 259235                        | 134.1                     | 14.41                         |
| AI           | 272352                        | 130.9                     | 15.90                         |

| Tracing Comparisons     |                     |                     |                     |                     |
|-------------------------|---------------------|---------------------|---------------------|---------------------|
| Difference Metric:      | Human-Human         |                     | Human-AI            |                     |
|                         | H1(ref)<br>H2(test) | H2(ref)<br>H1(test) | H1(ref)<br>AI(test) | H2(ref)<br>AI(test) |
| False Negative Area (%) | 3.6                 | 2.4                 | 2.3                 | 1.4                 |
| False Positive Area (%) | 2.4                 | 3.6                 | 6.1                 | 6.4                 |
| Relative Error (%)      | 1.2                 | 1.2                 | 3.8                 | 5.1                 |

| Blinded Attending Surgeon Review |              |                      |                      |                      |              |                         |
|----------------------------------|--------------|----------------------|----------------------|----------------------|--------------|-------------------------|
| Reviewer                         | PGT Estimate | H1 meets definition? | H2 meets definition? | AI meets definition? | Which is AI? | Which is most accurate? |
| 1                                | 10           | Yes                  | Yes                  | Yes                  | AI           | AI                      |
| 2                                | 10           | No                   | Yes                  | Yes                  | H1           | H2                      |
| 3                                | 90           | Yes                  | Yes                  | Yes                  | AI           | H2                      |

| Wound EMR Information |        |     |            |                |                   |                  |                  |                               |
|-----------------------|--------|-----|------------|----------------|-------------------|------------------|------------------|-------------------------------|
| Sequential Number     | Gender | Age | Wound Type | Wound Location | Wound Length (cm) | Wound Width (cm) | Wound Depth (cm) | Wound Area (cm <sup>2</sup> ) |
| 32                    | F      | 93  | VLU        | LLE ant        | 4.7               | 3.4              | 0.1              | 15.98                         |

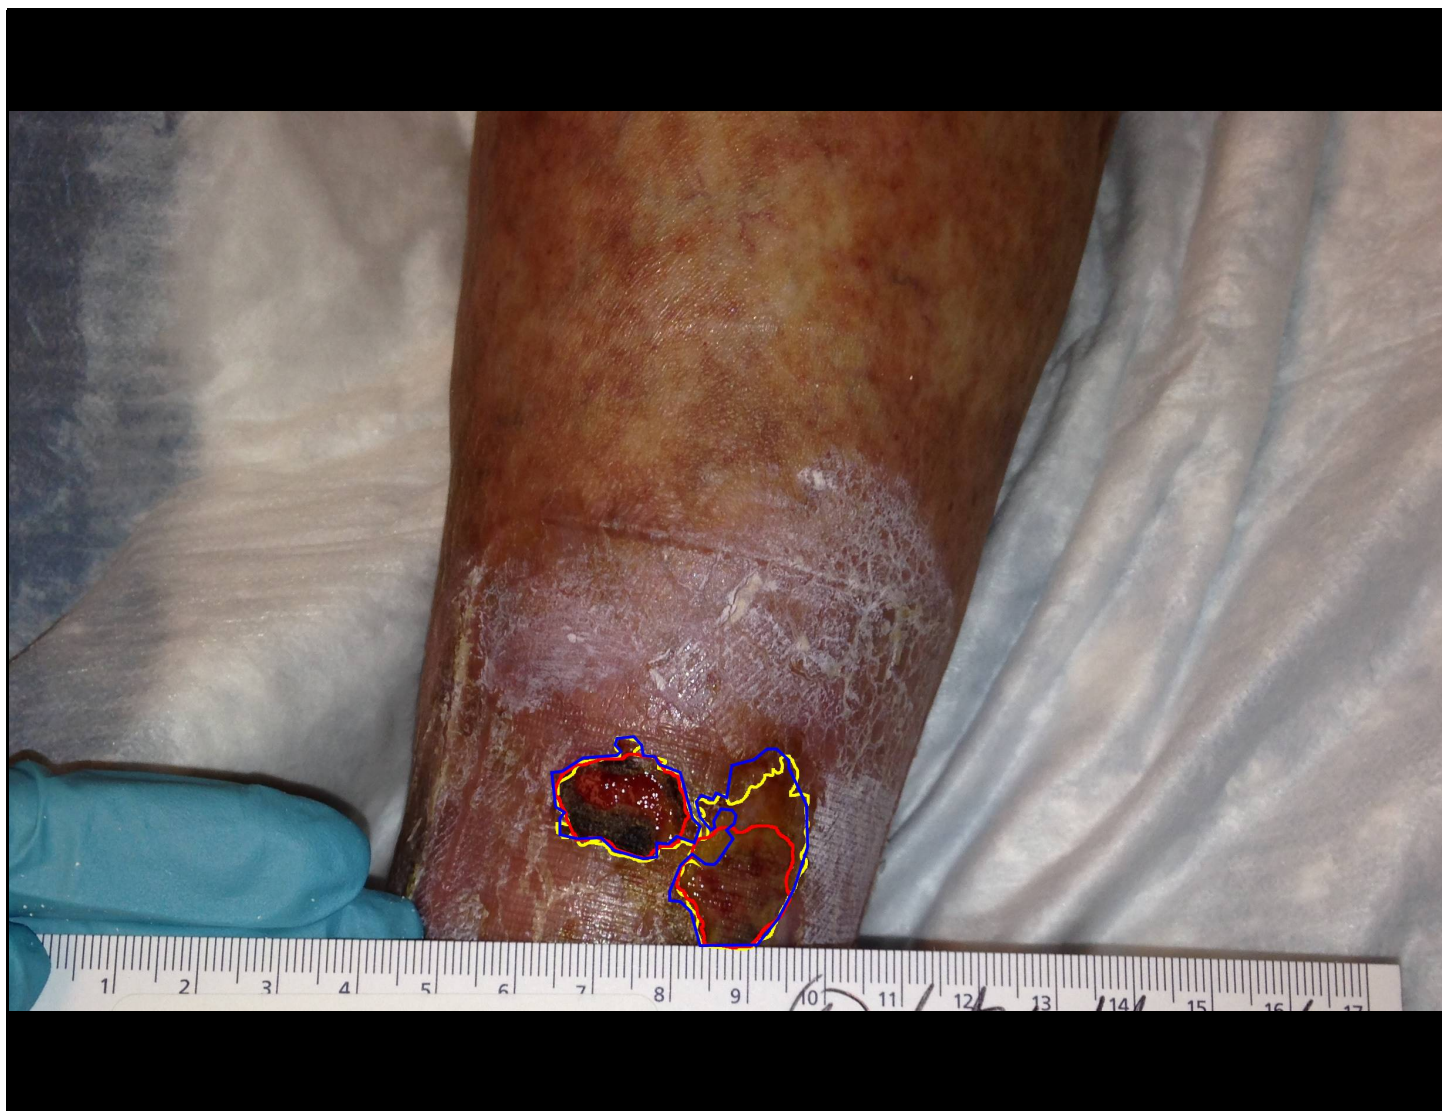

| Tracing Data |                               |                           |                               |
|--------------|-------------------------------|---------------------------|-------------------------------|
| Tracer:      | Wound Area (px <sup>2</sup> ) | Ruler Calibration (px/cm) | Wound Area (cm <sup>2</sup> ) |
| H1           | 79719                         | 132.8                     | 4.52                          |
| H2           | 59042                         | 132.0                     | 3.39                          |
| AI           | 81784                         | 72.9                      | 15.40                         |

| Tracing Comparisons     |                     |                     |                     |                     |
|-------------------------|---------------------|---------------------|---------------------|---------------------|
| Difference Metric:      | Human-Human         |                     | Human-AI            |                     |
|                         | H1(ref)<br>H2(test) | H2(ref)<br>H1(test) | H1(ref)<br>AI(test) | H2(ref)<br>AI(test) |
| False Negative Area (%) | 26.9                | 1.2                 | 8.3                 | 5.3                 |
| False Positive Area (%) | 0.9                 | 36.3                | 10.9                | 43.8                |
| Relative Error (%)      | 25.9                | 35.0                | 2.6                 | 38.5                |

| Blinded Attending Surgeon Review |              |                      |                      |                      |              |                         |
|----------------------------------|--------------|----------------------|----------------------|----------------------|--------------|-------------------------|
| Reviewer                         | PGT Estimate | H1 meets definition? | H2 meets definition? | AI meets definition? | Which is AI? | Which is most accurate? |
| 1                                | 10           | No                   | Yes                  | No                   | H1           | H1                      |
| 2                                | 30           | No                   | No                   | Yes                  | H2           | AI                      |
| 3                                | 60           | No                   | Yes                  | No                   | AI           | H1                      |

| Wound EMR Information |        |     |            |                |                   |                  |                  |                               |
|-----------------------|--------|-----|------------|----------------|-------------------|------------------|------------------|-------------------------------|
| Sequential Number     | Gender | Age | Wound Type | Wound Location | Wound Length (cm) | Wound Width (cm) | Wound Depth (cm) | Wound Area (cm <sup>2</sup> ) |
| 33                    | F      | 79  | VLU        | LLE medial     | 3.3               | 2.2              | 0.1              | 7.26                          |

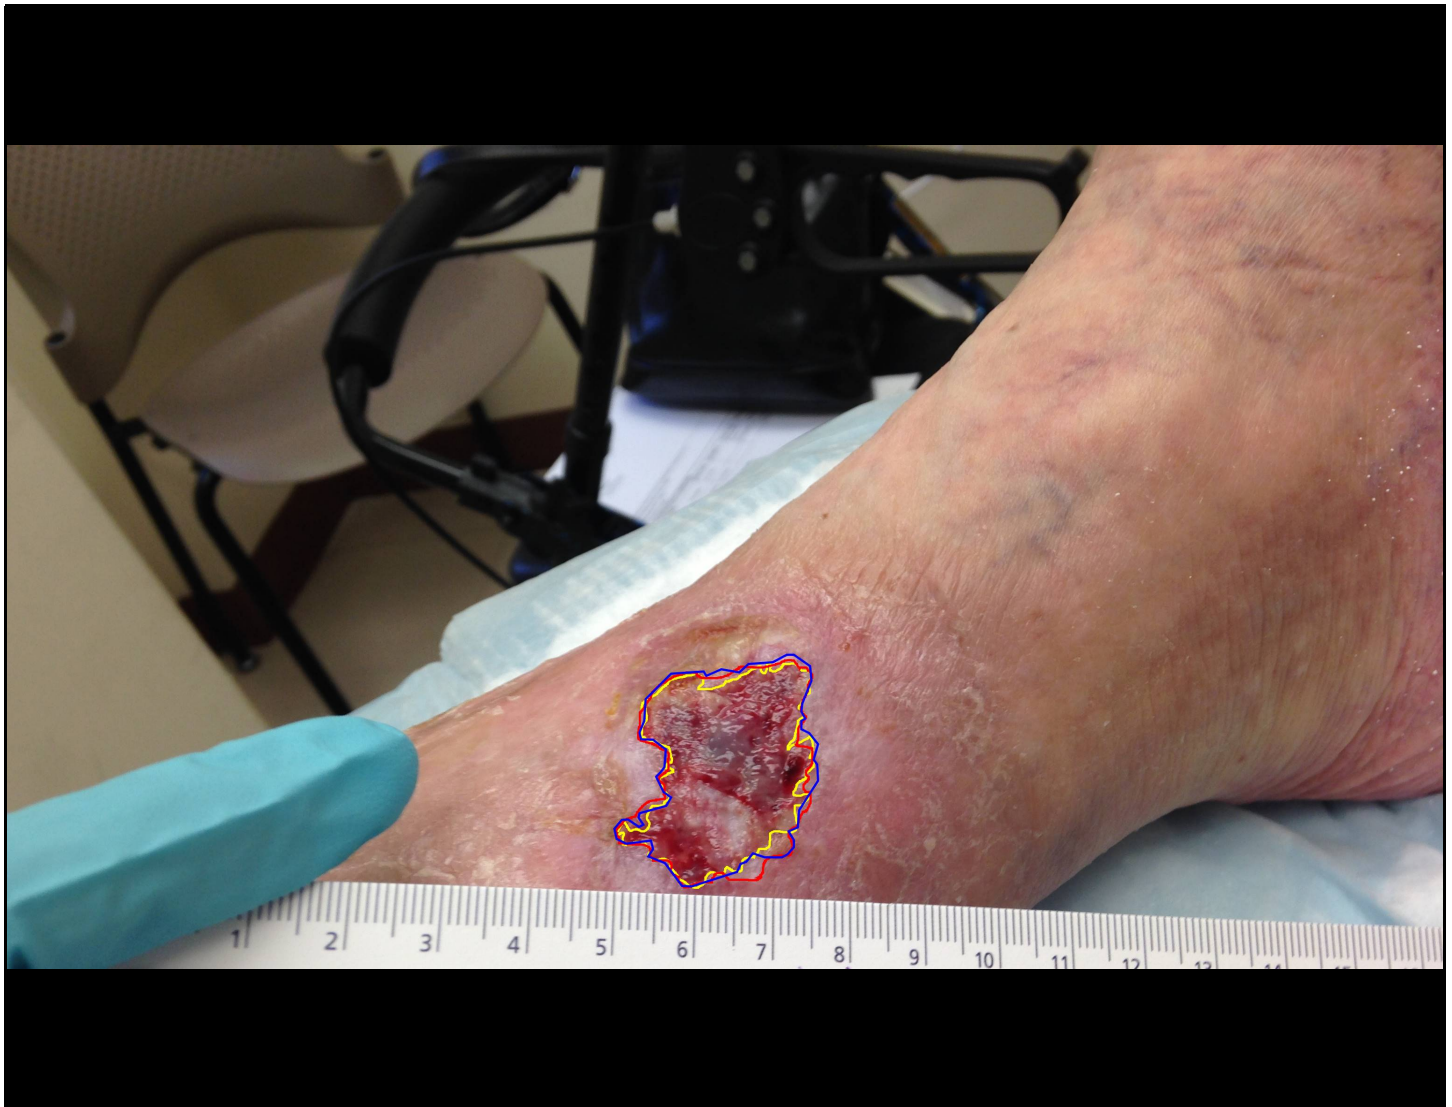

| Tracing Data |                               |                           |                               |
|--------------|-------------------------------|---------------------------|-------------------------------|
| Tracer:      | Wound Area (px <sup>2</sup> ) | Ruler Calibration (px/cm) | Wound Area (cm <sup>2</sup> ) |
| H1           | 143239                        | 185.1                     | 4.18                          |
| H2           | 159947                        | 178.8                     | 5.00                          |
| AI           | 160527                        | 195.5                     | 4.20                          |

| Tracing Comparisons     |                     |                     |                     |                     |
|-------------------------|---------------------|---------------------|---------------------|---------------------|
| Difference Metric:      | Human-Human         |                     | Human-AI            |                     |
|                         | H1(ref)<br>H2(test) | H2(ref)<br>H1(test) | H1(ref)<br>AI(test) | H2(ref)<br>AI(test) |
| False Negative Area (%) | 1.1                 | 11.4                | 0.9                 | 4.6                 |
| False Positive Area (%) | 12.7                | 1.0                 | 13.0                | 5.0                 |
| Relative Error (%)      | 11.7                | 10.4                | 12.1                | 0.4                 |

| Blinded Attending Surgeon Review |              |                      |                      |                      |              |                         |
|----------------------------------|--------------|----------------------|----------------------|----------------------|--------------|-------------------------|
| Reviewer                         | PGT Estimate | H1 meets definition? | H2 meets definition? | AI meets definition? | Which is AI? | Which is most accurate? |
| 1                                | 40           | No                   | No                   | No                   | H1           | H2                      |
| 2                                | 30           | No                   | No                   | No                   | H1           | H1                      |
| 3                                | 60           | Yes                  | No                   | No                   | AI           | H1                      |

| Wound EMR Information |        |     |            |                |                   |                  |                  |                               |
|-----------------------|--------|-----|------------|----------------|-------------------|------------------|------------------|-------------------------------|
| Sequential Number     | Gender | Age | Wound Type | Wound Location | Wound Length (cm) | Wound Width (cm) | Wound Depth (cm) | Wound Area (cm <sup>2</sup> ) |
| 34                    | M      | 56  | VLU        | RLE ant        | 0.0               | 0.0              | 0.0              | 0.00                          |

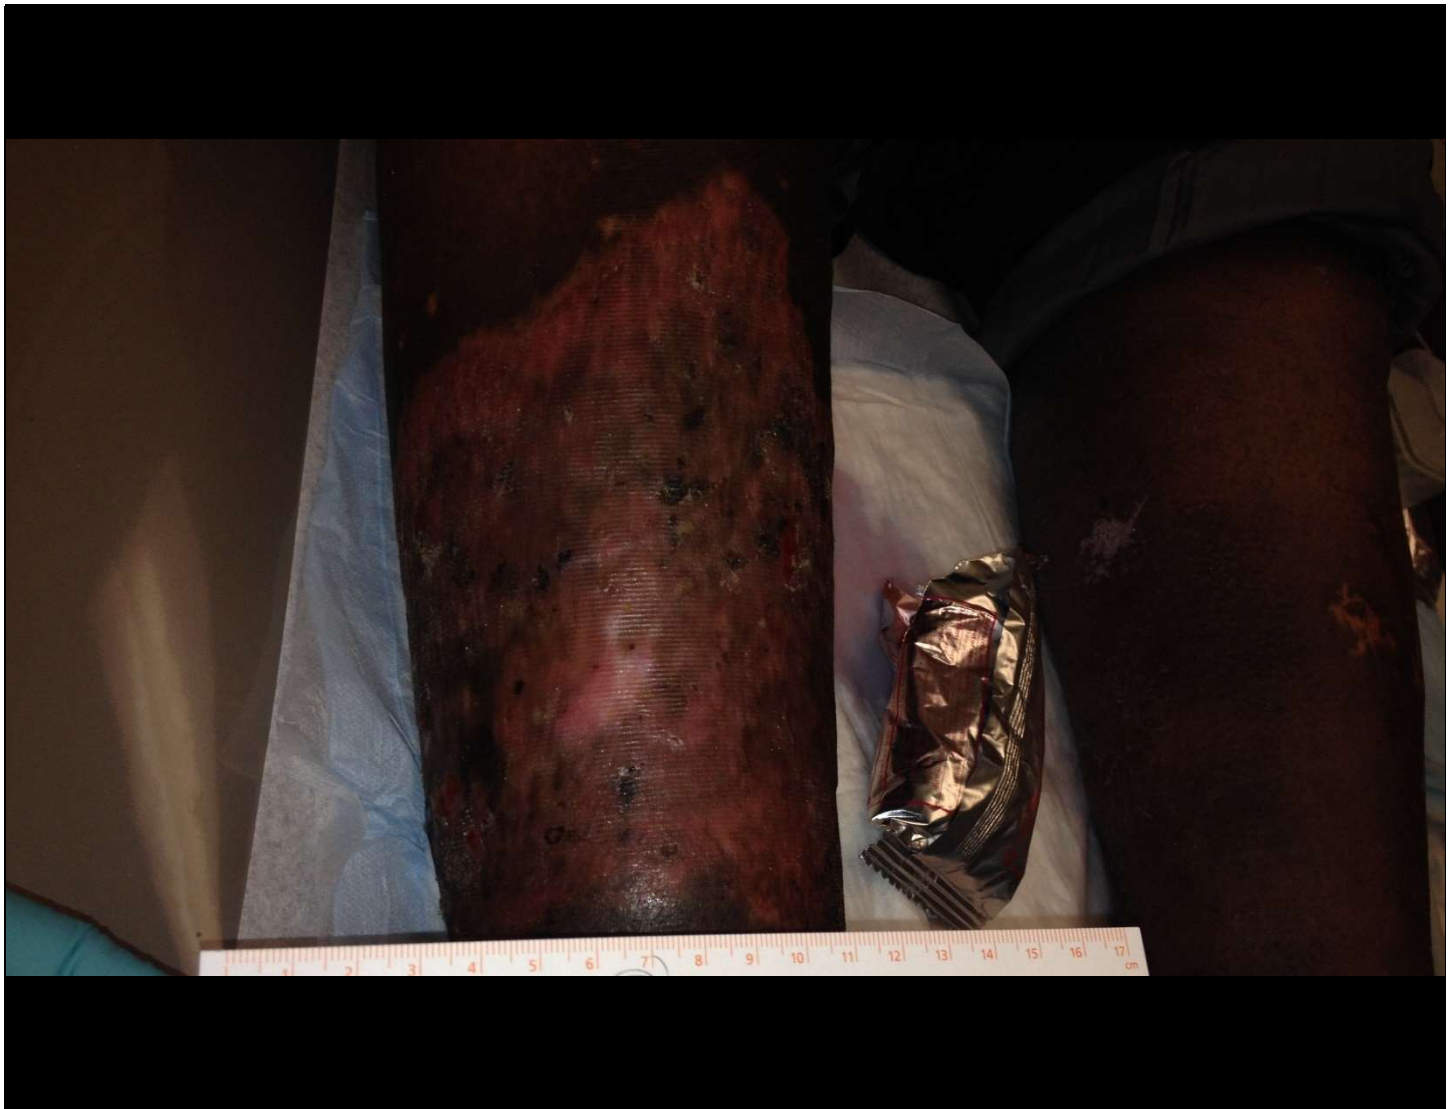

| Tracing Data |                               |                           |                               |
|--------------|-------------------------------|---------------------------|-------------------------------|
| Tracer:      | Wound Area (px <sup>2</sup> ) | Ruler Calibration (px/cm) | Wound Area (cm <sup>2</sup> ) |
| H1           | 0                             |                           | 0.00                          |
| H2           | 0                             |                           | 0.00                          |
| AI           | 0                             |                           | 0.00                          |

| Tracing Comparisons     |                     |                     |                     |                     |
|-------------------------|---------------------|---------------------|---------------------|---------------------|
| Difference Metric:      | Human-Human         |                     | Human-AI            |                     |
|                         | H1(ref)<br>H2(test) | H2(ref)<br>H1(test) | H1(ref)<br>AI(test) | H2(ref)<br>AI(test) |
| False Negative Area (%) |                     |                     |                     |                     |
| False Positive Area (%) |                     |                     |                     |                     |
| Relative Error (%)      |                     |                     |                     |                     |

| Blinded Attending Surgeon Review |              |                      |                      |                      |              |                         |
|----------------------------------|--------------|----------------------|----------------------|----------------------|--------------|-------------------------|
| Reviewer                         | PGT Estimate | H1 meets definition? | H2 meets definition? | AI meets definition? | Which is AI? | Which is most accurate? |
| 1                                | healed       | Yes                  | Yes                  | Yes                  | 0            | 0                       |
| 2                                | healed       | Yes                  | Yes                  | Yes                  | 0            | 0                       |
| 3                                | 0            | Yes                  | Yes                  | Yes                  | 0            | 0                       |

| Wound EMR Information |        |     |            |                |                   |                  |                  |                               |
|-----------------------|--------|-----|------------|----------------|-------------------|------------------|------------------|-------------------------------|
| Sequential Number     | Gender | Age | Wound Type | Wound Location | Wound Length (cm) | Wound Width (cm) | Wound Depth (cm) | Wound Area (cm <sup>2</sup> ) |
| 35                    | F      | 94  | VLU        | RLE ant        | 0.5               | 1.2              | 0.1              | 0.60                          |

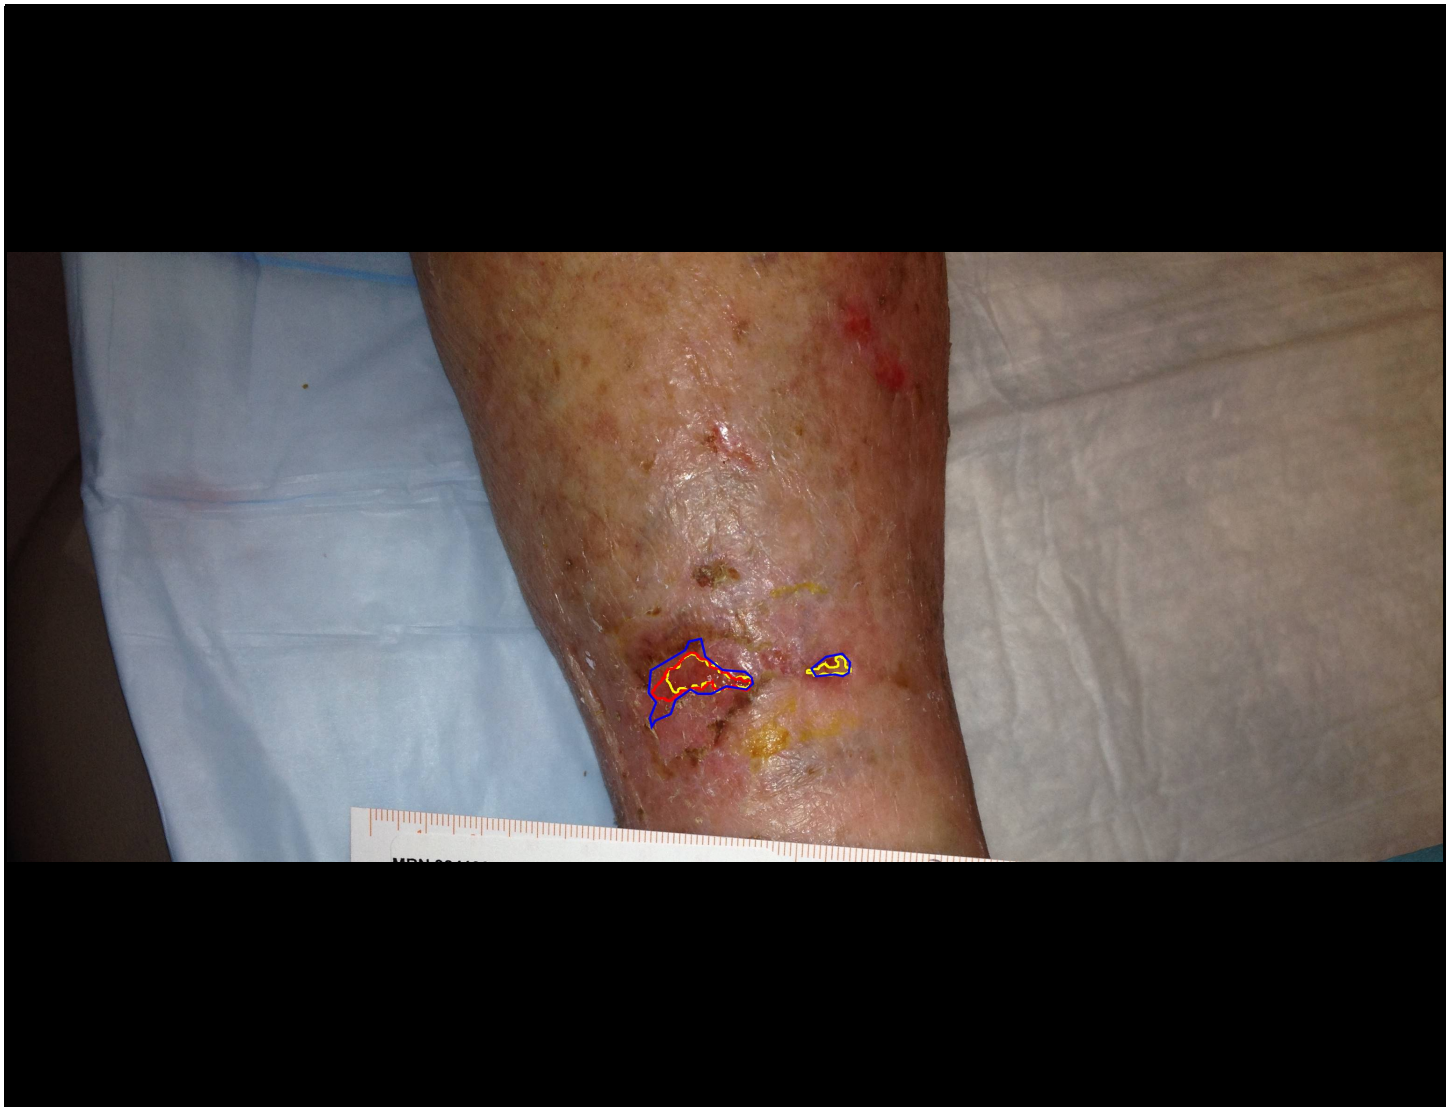

| Tracing Data |                               |                           |                               |
|--------------|-------------------------------|---------------------------|-------------------------------|
| Tracer:      | Wound Area (px <sup>2</sup> ) | Ruler Calibration (px/cm) | Wound Area (cm <sup>2</sup> ) |
| H1           | 10429                         | 125.7                     | 0.66                          |
| H2           | 10817                         | 121.1                     | 0.74                          |
| AI           | 22106                         | 130.4                     | 1.30                          |

| Tracing Comparisons     |                     |                     |                     |                     |
|-------------------------|---------------------|---------------------|---------------------|---------------------|
| Difference Metric:      | Human-Human         |                     | Human-AI            |                     |
|                         | H1(ref)<br>H2(test) | H2(ref)<br>H1(test) | H1(ref)<br>AI(test) | H2(ref)<br>AI(test) |
| False Negative Area (%) | 22.3                | 25.1                | 1.8                 | 0.6                 |
| False Positive Area (%) | 26.0                | 21.5                | 113.8               | 105.0               |
| Relative Error (%)      | 3.7                 | 3.6                 | 112.0               | 104.4               |

| Blinded Attending Surgeon Review |              |                      |                      |                      |              |                         |
|----------------------------------|--------------|----------------------|----------------------|----------------------|--------------|-------------------------|
| Reviewer                         | PGT Estimate | H1 meets definition? | H2 meets definition? | AI meets definition? | Which is AI? | Which is most accurate? |
| 1                                | 100          | Yes                  | No                   | No                   | H2           | H1                      |
| 2                                | 80           | Yes                  | Yes                  | No                   | H1           | AI                      |
| 3                                | 30           | Yes                  | Yes                  | No                   | H2           | H1                      |

| Wound EMR Information |        |     |            |                |                   |                  |                  |                               |
|-----------------------|--------|-----|------------|----------------|-------------------|------------------|------------------|-------------------------------|
| Sequential Number     | Gender | Age | Wound Type | Wound Location | Wound Length (cm) | Wound Width (cm) | Wound Depth (cm) | Wound Area (cm <sup>2</sup> ) |
| 36                    | F      | 62  | Trauma     | LLE ant        | 1.8               | 2.4              | 0.6              | 4.32                          |

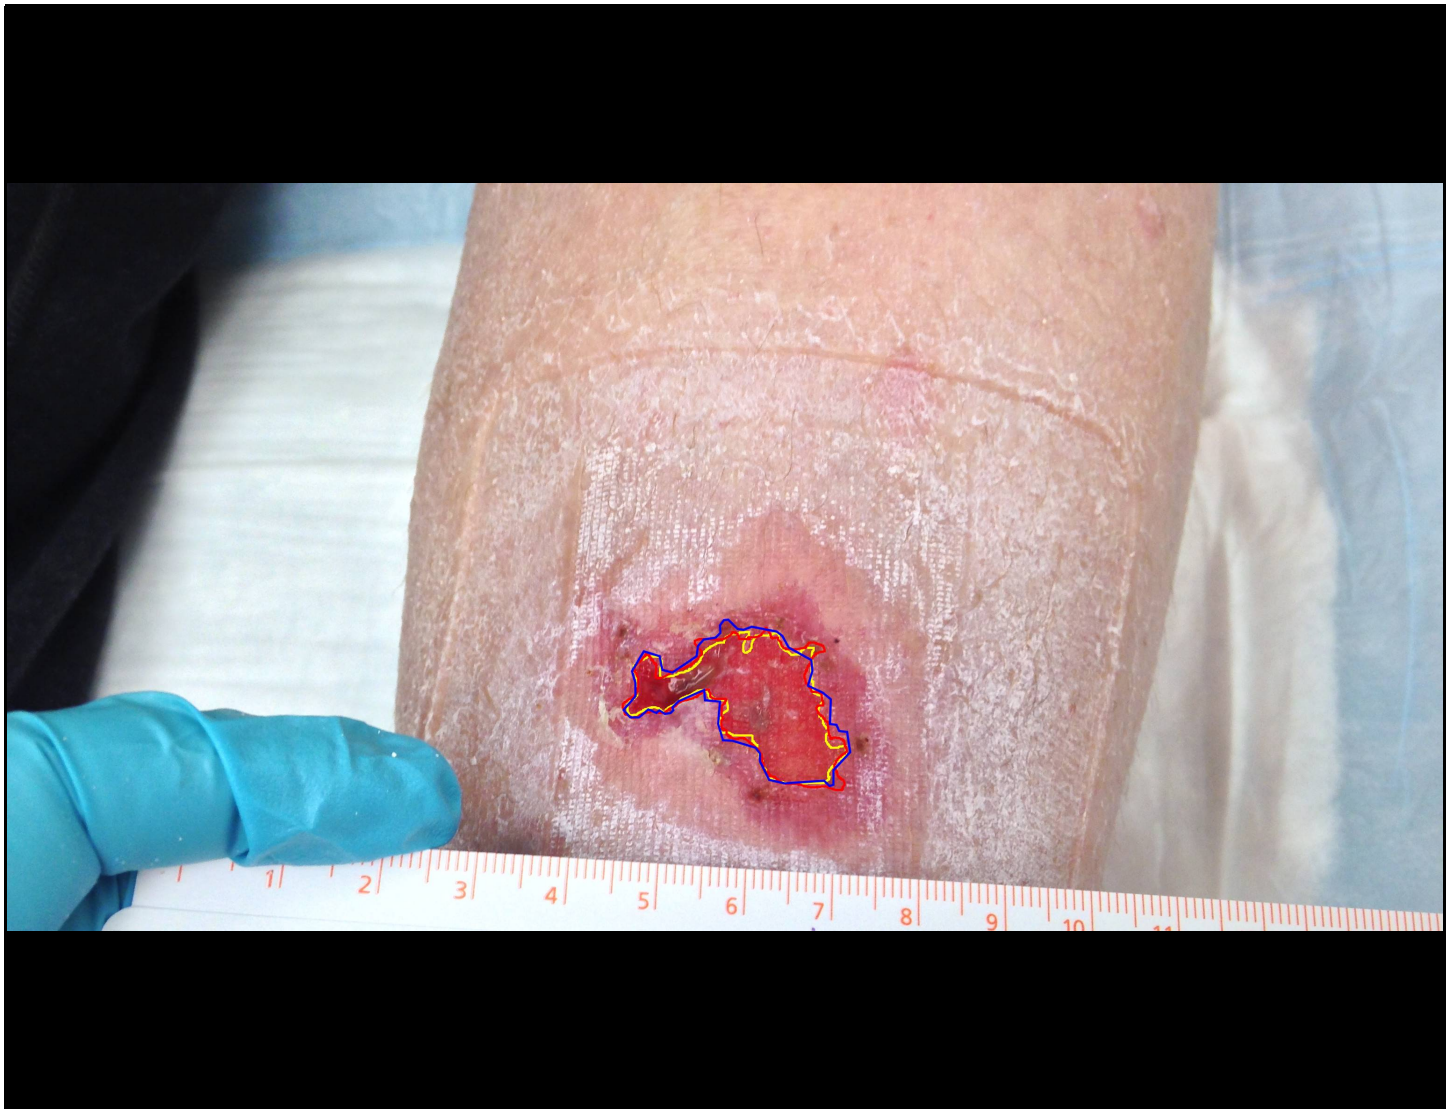

| Tracing Data |                               |                           |                               |
|--------------|-------------------------------|---------------------------|-------------------------------|
| Tracer:      | Wound Area (px <sup>2</sup> ) | Ruler Calibration (px/cm) | Wound Area (cm <sup>2</sup> ) |
| H1           | 81400                         | 204.3                     | 1.95                          |
| H2           | 88130                         | 199.1                     | 2.22                          |
| AI           | 95726                         | 208.6                     | 2.20                          |

| Tracing Comparisons     |                     |                     |                     |                     |
|-------------------------|---------------------|---------------------|---------------------|---------------------|
| Difference Metric:      | Human-Human         |                     | Human-AI            |                     |
|                         | H1(ref)<br>H2(test) | H2(ref)<br>H1(test) | H1(ref)<br>AI(test) | H2(ref)<br>AI(test) |
| False Negative Area (%) | 3.5                 | 10.9                | 1.3                 | 4.5                 |
| False Positive Area (%) | 11.8                | 3.3                 | 18.9                | 13.2                |
| Relative Error (%)      | 8.3                 | 7.6                 | 17.6                | 8.6                 |

| Blinded Attending Surgeon Review |              |                      |                      |                      |              |                         |
|----------------------------------|--------------|----------------------|----------------------|----------------------|--------------|-------------------------|
| Reviewer                         | PGT Estimate | H1 meets definition? | H2 meets definition? | AI meets definition? | Which is AI? | Which is most accurate? |
| 1                                | 90           | Yes                  | No                   | No                   | H2           | H2                      |
| 2                                | 60           | Yes                  | Yes                  | Yes                  | AI           | H1                      |
| 3                                | 50           | Yes                  | Yes                  | No                   | AI           | H2                      |

| Wound EMR Information |        |     |            |                |                   |                  |                  |                               |
|-----------------------|--------|-----|------------|----------------|-------------------|------------------|------------------|-------------------------------|
| Sequential Number     | Gender | Age | Wound Type | Wound Location | Wound Length (cm) | Wound Width (cm) | Wound Depth (cm) | Wound Area (cm <sup>2</sup> ) |
| 37                    | F      | 84  | VLU        | RLE ant        | 8.8               | 1.5              | 0.1              | 13.20                         |

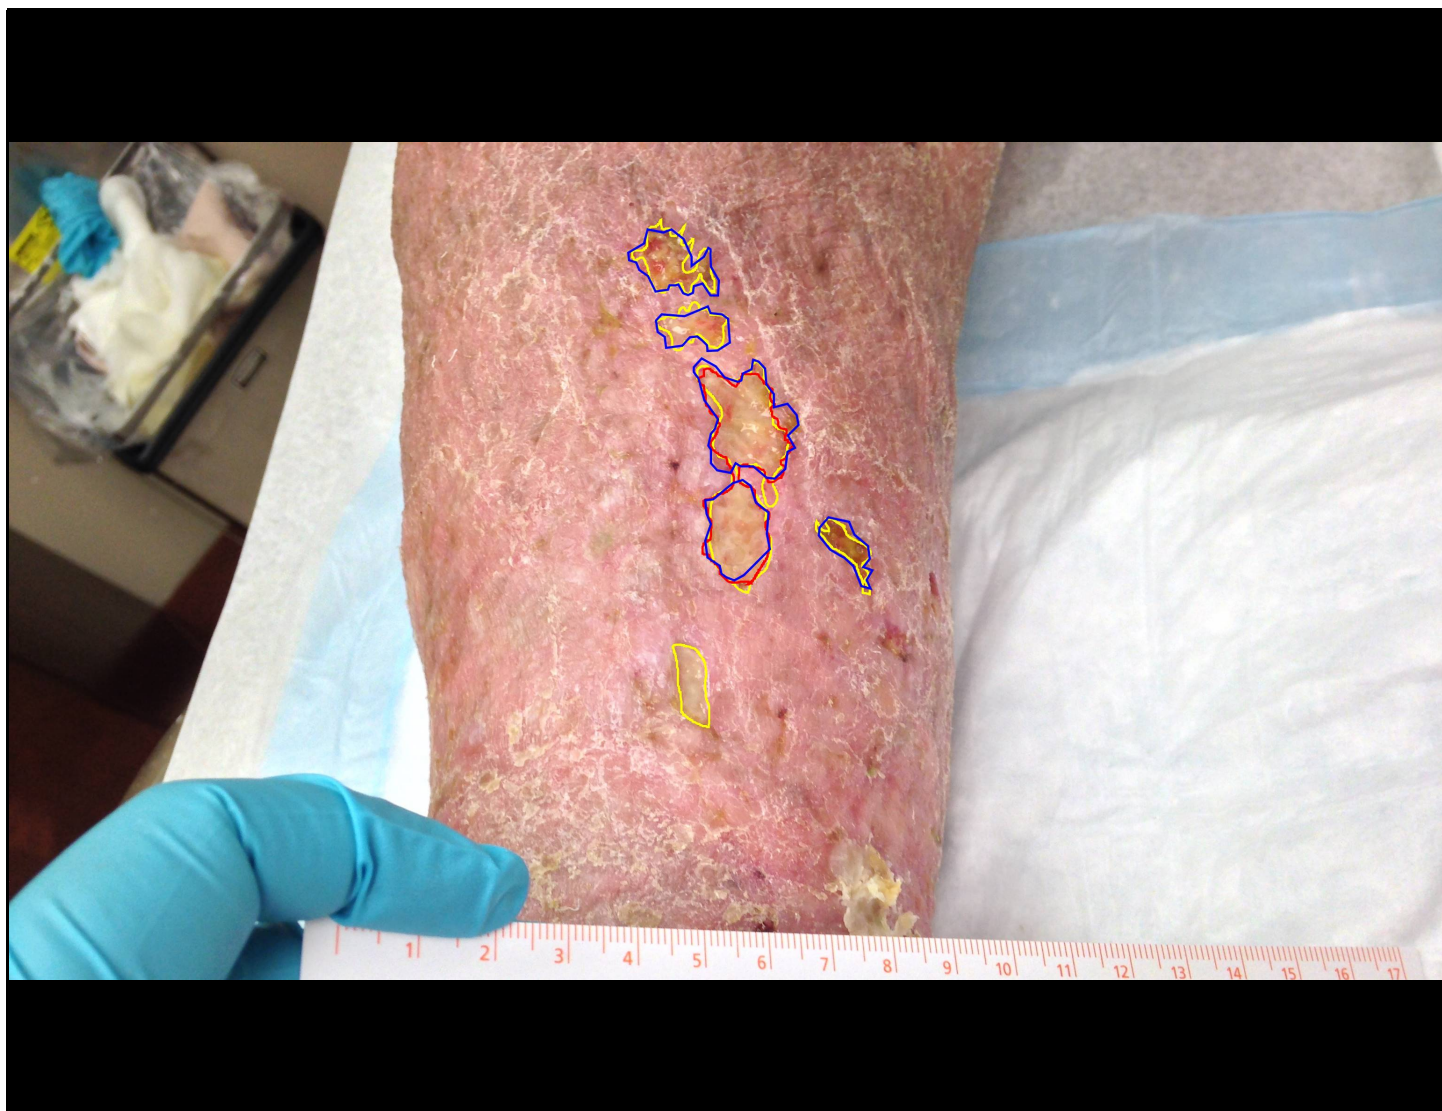

| Tracing Data |                               |                           |                               |
|--------------|-------------------------------|---------------------------|-------------------------------|
| Tracer:      | Wound Area (px <sup>2</sup> ) | Ruler Calibration (px/cm) | Wound Area (cm <sup>2</sup> ) |
| H1           | 100790                        | 160.6                     | 3.91                          |
| H2           | 57479                         | 112.7                     | 4.53                          |
| AI           | 101038                        | 151.5                     | 4.40                          |

| Tracing Comparisons     |                     |                     |                     |                     |
|-------------------------|---------------------|---------------------|---------------------|---------------------|
| Difference Metric:      | Human-Human         |                     | Human-AI            |                     |
|                         | H1(ref)<br>H2(test) | H2(ref)<br>H1(test) | H1(ref)<br>AI(test) | H2(ref)<br>AI(test) |
| False Negative Area (%) | 47.5                | 8.0                 | 18.6                | 5.8                 |
| False Positive Area (%) | 4.5                 | 83.3                | 18.8                | 81.6                |
| Relative Error (%)      | 43.0                | 75.4                | 0.2                 | 75.8                |

| Blinded Attending Surgeon Review |              |                      |                      |                      |              |                         |
|----------------------------------|--------------|----------------------|----------------------|----------------------|--------------|-------------------------|
| Reviewer                         | PGT Estimate | H1 meets definition? | H2 meets definition? | AI meets definition? | Which is AI? | Which is most accurate? |
| 1                                | 20           | Yes                  | No                   | Yes                  | AI           | AI                      |
| 2                                | 0            | No                   | Yes                  | No                   | H2           | H2                      |
| 3                                | 0            | Yes                  | Yes                  | No                   | H2           | H2                      |

| Wound EMR Information |        |     |            |                |                   |                  |                  |                               |
|-----------------------|--------|-----|------------|----------------|-------------------|------------------|------------------|-------------------------------|
| Sequential Number     | Gender | Age | Wound Type | Wound Location | Wound Length (cm) | Wound Width (cm) | Wound Depth (cm) | Wound Area (cm <sup>2</sup> ) |
| 38                    | F      | 67  | VLU        | LLE ant        | 8.5               | 6.0              | 0.1              | 51.00                         |

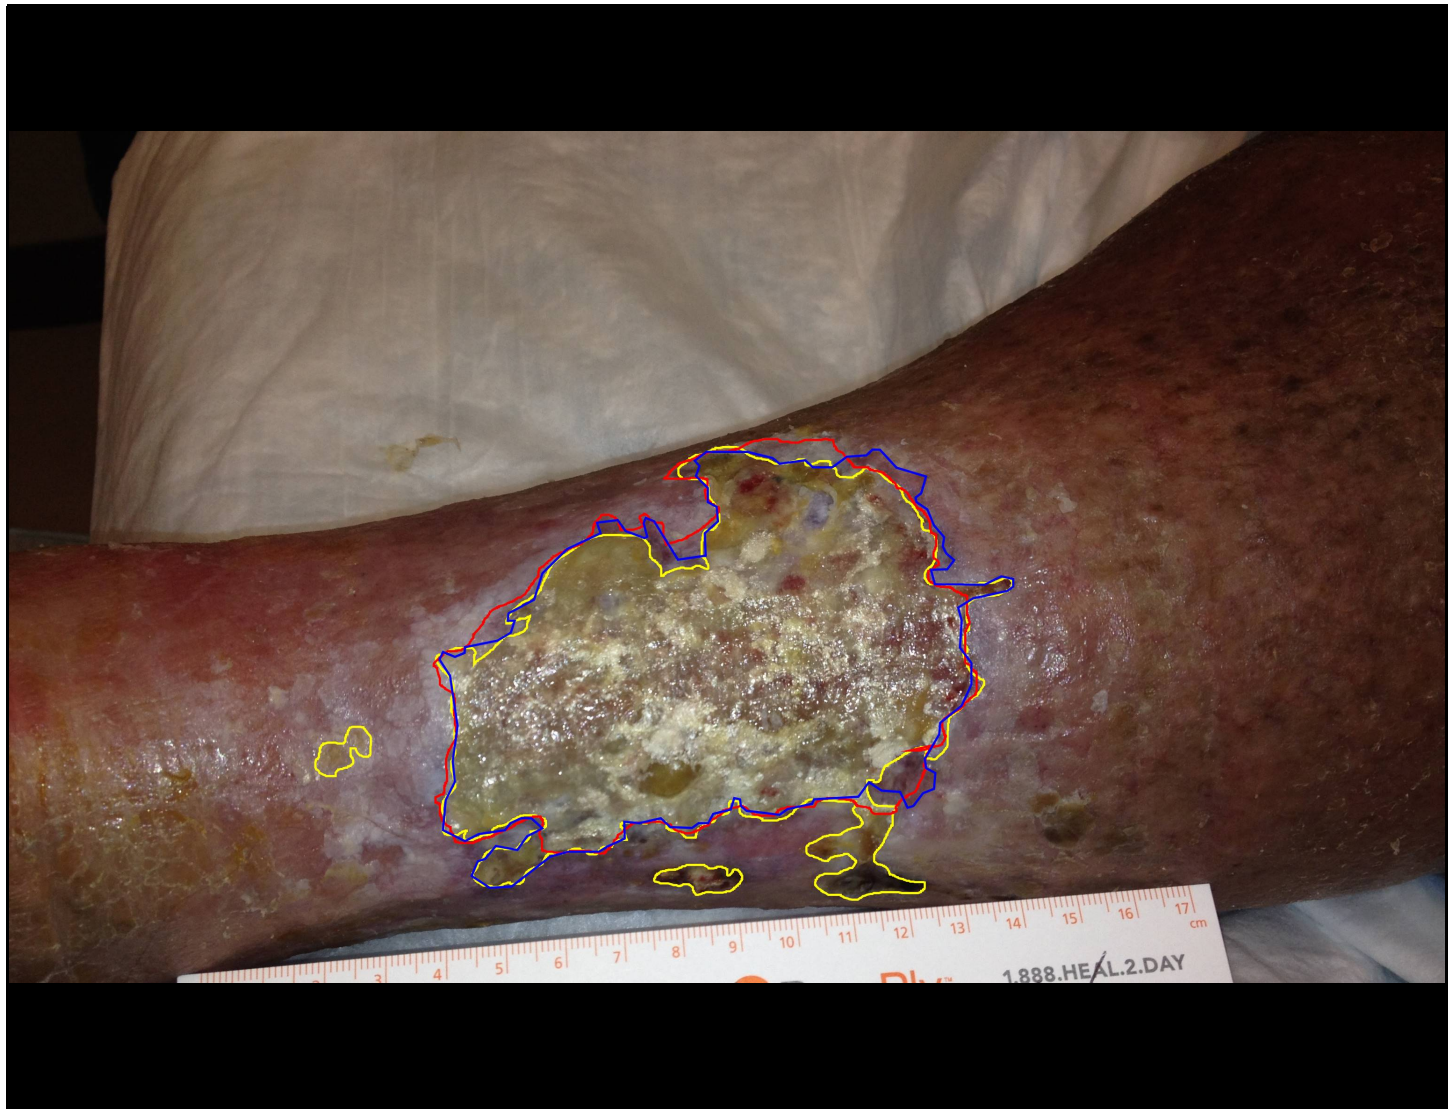

| Tracing Data |                               |                           |                               |
|--------------|-------------------------------|---------------------------|-------------------------------|
| Tracer:      | Wound Area (px <sup>2</sup> ) | Ruler Calibration (px/cm) | Wound Area (cm <sup>2</sup> ) |
| H1           | 801636                        | 130.9                     | 46.77                         |
| H2           | 794980                        | 130.2                     | 46.86                         |
| AI           | 782506                        | 136.7                     | 41.90                         |

| Tracing Comparisons     |                     |                     |                     |                     |
|-------------------------|---------------------|---------------------|---------------------|---------------------|
| Difference Metric:      | Human-Human         |                     | Human-AI            |                     |
|                         | H1(ref)<br>H2(test) | H2(ref)<br>H1(test) | H1(ref)<br>AI(test) | H2(ref)<br>AI(test) |
| False Negative Area (%) | 8.2                 | 7.4                 | 7.6                 | 5.6                 |
| False Positive Area (%) | 7.4                 | 8.2                 | 5.2                 | 4.0                 |
| Relative Error (%)      | 0.8                 | 0.8                 | 2.4                 | 1.6                 |

| Blinded Attending Surgeon Review |              |                      |                      |                      |              |                         |
|----------------------------------|--------------|----------------------|----------------------|----------------------|--------------|-------------------------|
| Reviewer                         | PGT Estimate | H1 meets definition? | H2 meets definition? | AI meets definition? | Which is AI? | Which is most accurate? |
| 1                                | 0            | No                   | No                   | No                   | AI           | AI                      |
| 2                                | 0            | No                   | No                   | No                   | AI           | H2                      |
| 3                                | 0            | Yes                  | No                   | Yes                  | H1           | AI                      |



| Wound EMR Information |        |     |            |                |                   |                  |                  |                               |
|-----------------------|--------|-----|------------|----------------|-------------------|------------------|------------------|-------------------------------|
| Sequential Number     | Gender | Age | Wound Type | Wound Location | Wound Length (cm) | Wound Width (cm) | Wound Depth (cm) | Wound Area (cm <sup>2</sup> ) |
| 39                    | F      | 41  | Surgical   | Abdomen        | 0.5               | 1.5              | 0.1              | 0.75                          |

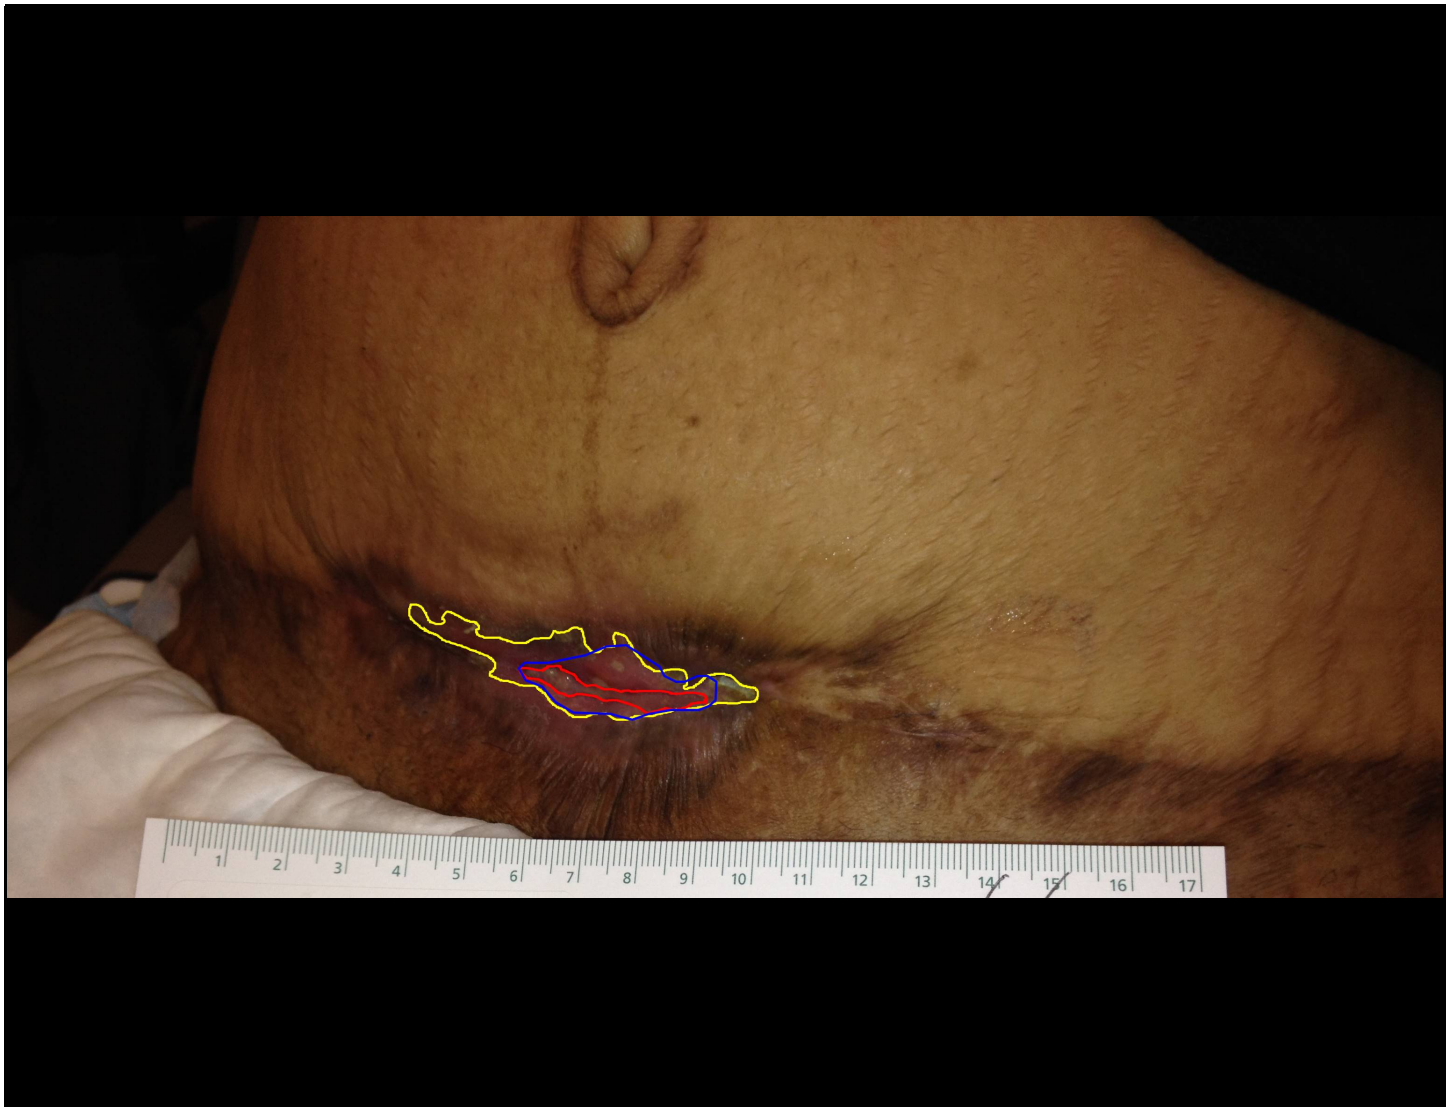

| Tracing Data |                               |                           |                               |
|--------------|-------------------------------|---------------------------|-------------------------------|
| Tracer:      | Wound Area (px <sup>2</sup> ) | Ruler Calibration (px/cm) | Wound Area (cm <sup>2</sup> ) |
| H1           | 76087                         | 129.3                     | 4.55                          |
| H2           | 13935                         | 129.0                     | 0.84                          |
| AI           | 45348                         | 134.7                     | 2.50                          |

| Tracing Comparisons     |                     |                     |                     |                     |
|-------------------------|---------------------|---------------------|---------------------|---------------------|
| Difference Metric:      | Human-Human         |                     | Human-AI            |                     |
|                         | H1(ref)<br>H2(test) | H2(ref)<br>H1(test) | H1(ref)<br>AI(test) | H2(ref)<br>AI(test) |
| False Negative Area (%) | 81.7                | 0.0                 | 43.0                | 0.0                 |
| False Positive Area (%) | 0.0                 | 446.0               | 2.6                 | 225.4               |
| Relative Error (%)      | 81.7                | 446.0               | 40.4                | 225.4               |

| Blinded Attending Surgeon Review |              |                      |                      |                      |              |                         |
|----------------------------------|--------------|----------------------|----------------------|----------------------|--------------|-------------------------|
| Reviewer                         | PGT Estimate | H1 meets definition? | H2 meets definition? | AI meets definition? | Which is AI? | Which is most accurate? |
| 1                                | 30           | Yes                  | Yes                  | Yes                  | AI           | 0                       |
| 2                                | 0            | No                   | Yes                  | No                   | H2           | AI                      |
| 3                                | 20           | No                   | Yes                  | No                   | H1           | AI                      |

| Wound EMR Information |        |     |            |                |                   |                  |                  |                               |
|-----------------------|--------|-----|------------|----------------|-------------------|------------------|------------------|-------------------------------|
| Sequential Number     | Gender | Age | Wound Type | Wound Location | Wound Length (cm) | Wound Width (cm) | Wound Depth (cm) | Wound Area (cm <sup>2</sup> ) |
| 40                    | F      | 72  | VLU        | R foot dorsal  | 4.2               | 4.7              | 0.2              | 19.74                         |

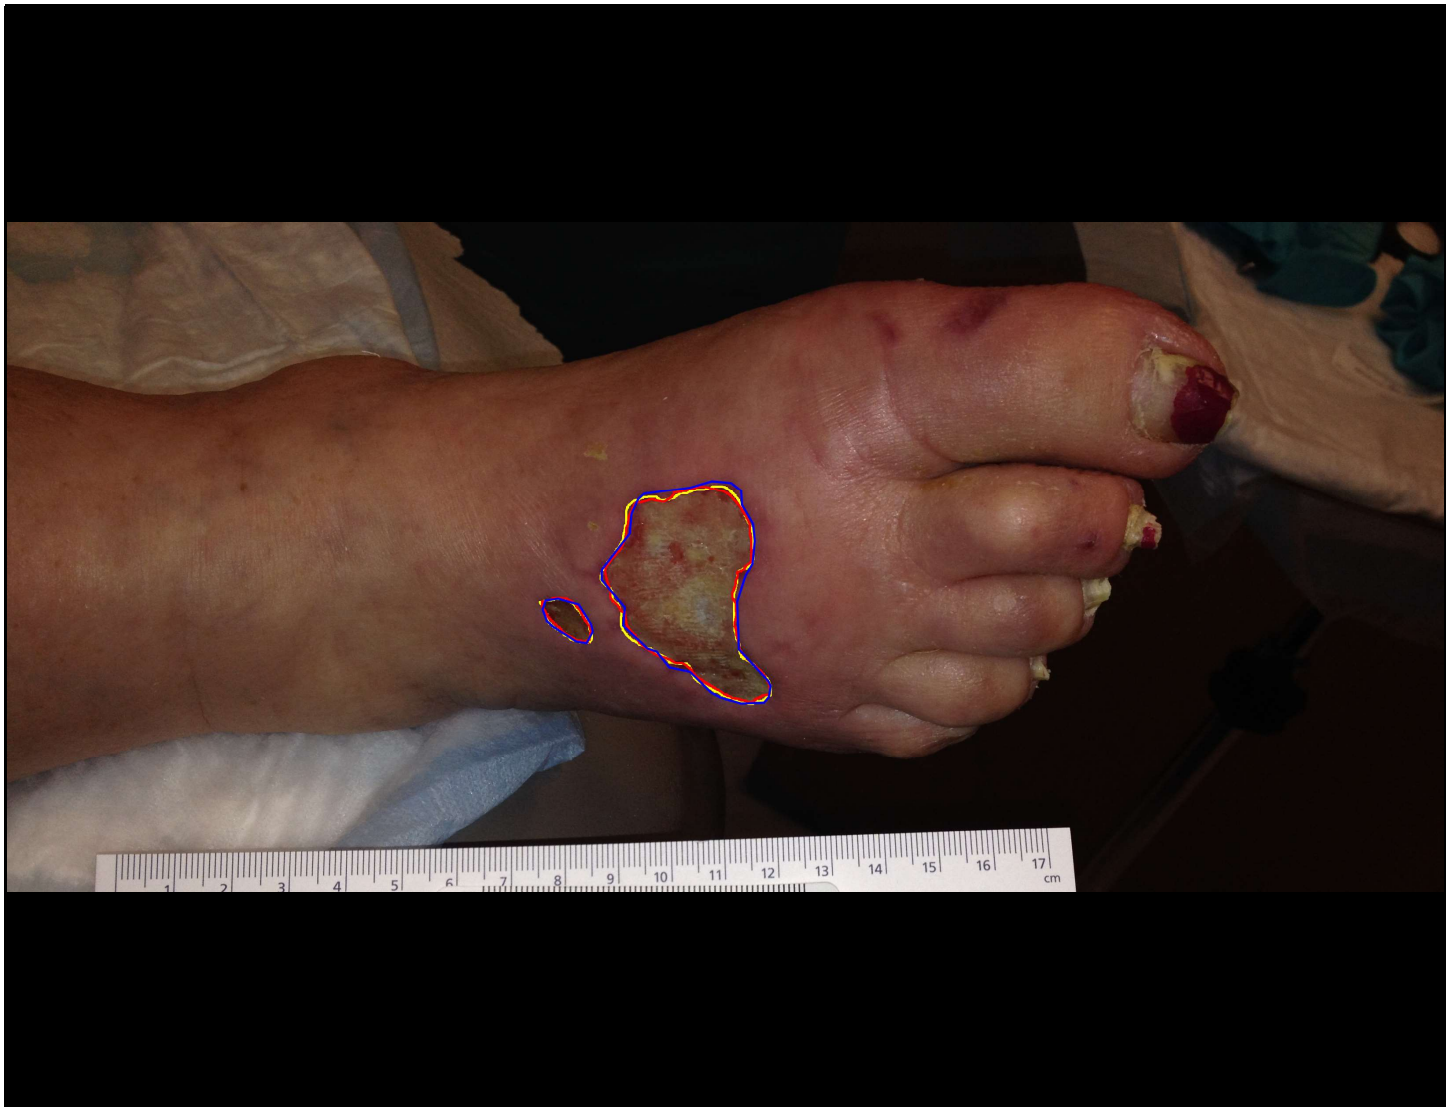

| Tracing Data |                               |                           |                               |
|--------------|-------------------------------|---------------------------|-------------------------------|
| Tracer:      | Wound Area (px <sup>2</sup> ) | Ruler Calibration (px/cm) | Wound Area (cm <sup>2</sup> ) |
| H1           | 122612                        | 122.7                     | 8.14                          |
| H2           | 118393                        | 121.3                     | 8.04                          |
| AI           | 127823                        | 121.9                     | 8.60                          |

| Tracing Comparisons     |                     |                     |                     |                     |
|-------------------------|---------------------|---------------------|---------------------|---------------------|
| Difference Metric:      | Human-Human         |                     | Human-AI            |                     |
|                         | H1(ref)<br>H2(test) | H2(ref)<br>H1(test) | H1(ref)<br>AI(test) | H2(ref)<br>AI(test) |
| False Negative Area (%) | 4.8                 | 1.4                 | 2.3                 | 1.3                 |
| False Positive Area (%) | 1.4                 | 5.0                 | 6.6                 | 9.3                 |
| Relative Error (%)      | 3.4                 | 3.6                 | 4.3                 | 8.0                 |

| Blinded Attending Surgeon Review |              |                      |                      |                      |              |                         |
|----------------------------------|--------------|----------------------|----------------------|----------------------|--------------|-------------------------|
| Reviewer                         | PGT Estimate | H1 meets definition? | H2 meets definition? | AI meets definition? | Which is AI? | Which is most accurate? |
| 1                                | 10           | Yes                  | Yes                  | Yes                  | H2           | H1                      |
| 2                                | 0            | Yes                  | Yes                  | Yes                  | AI           | H2                      |
| 3                                | 10           | Yes                  | Yes                  | Yes                  | AI           | H1                      |

| Wound EMR Information |        |     |            |                |                   |                  |                  |                               |
|-----------------------|--------|-----|------------|----------------|-------------------|------------------|------------------|-------------------------------|
| Sequential Number     | Gender | Age | Wound Type | Wound Location | Wound Length (cm) | Wound Width (cm) | Wound Depth (cm) | Wound Area (cm <sup>2</sup> ) |
| 41                    | F      | 74  | VLU        | LLE medial     | 3.0               | 2.8              | 0.2              | 8.40                          |

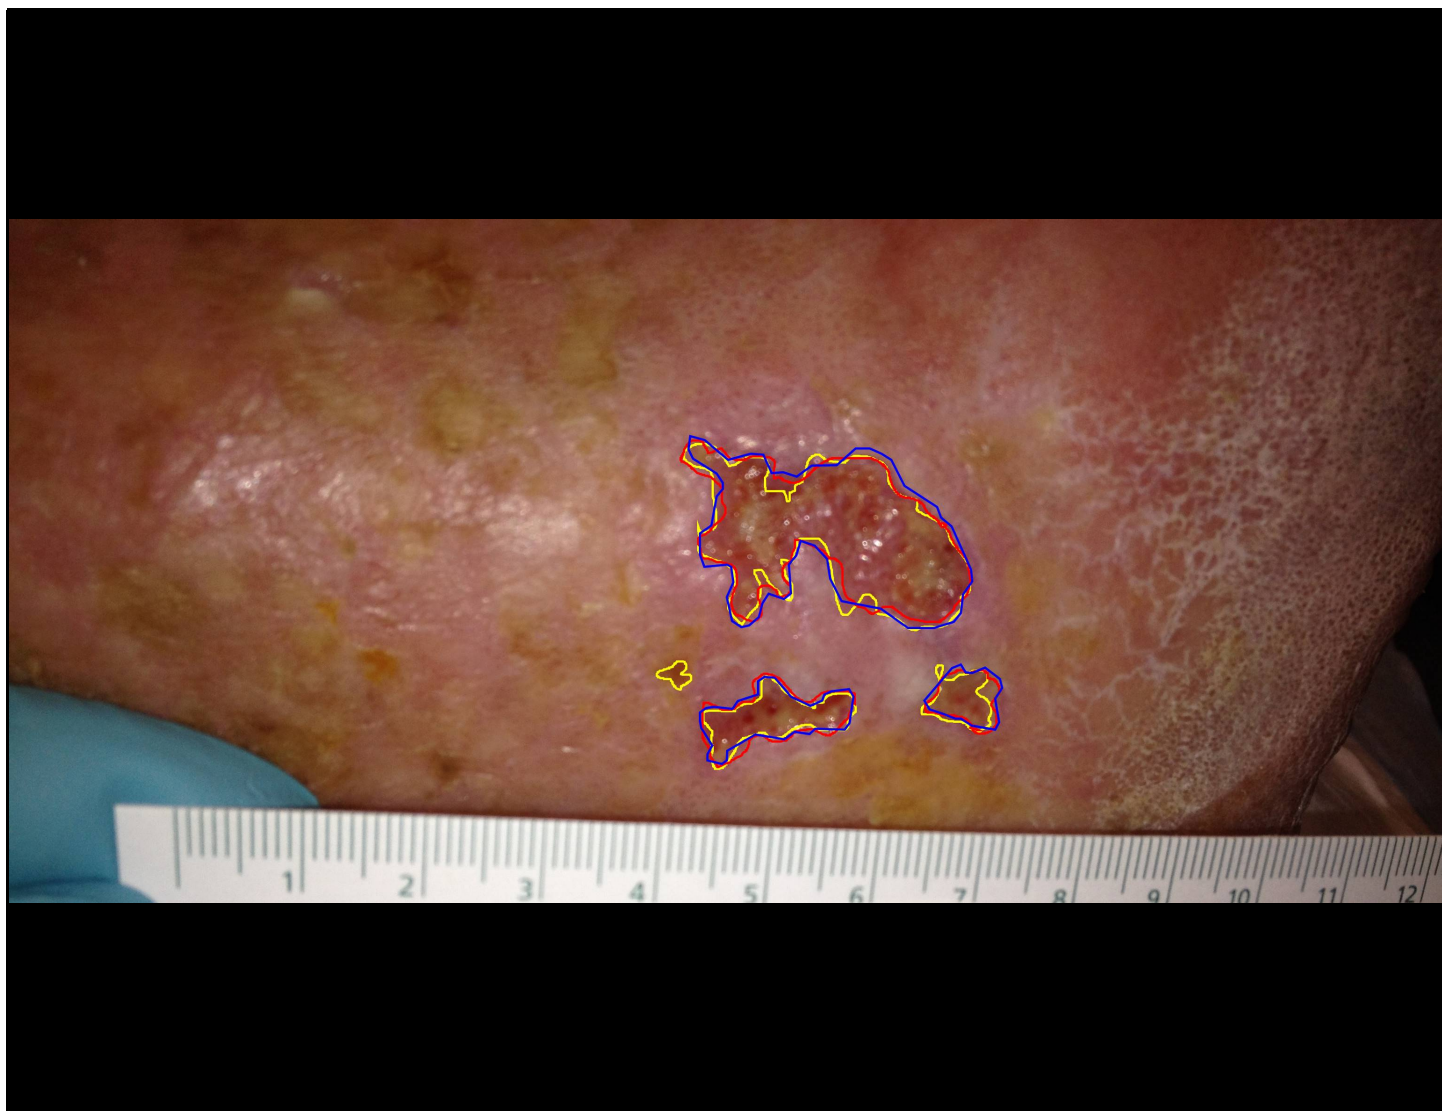

| Tracing Data |                               |                           |                               |
|--------------|-------------------------------|---------------------------|-------------------------------|
| Tracer:      | Wound Area (px <sup>2</sup> ) | Ruler Calibration (px/cm) | Wound Area (cm <sup>2</sup> ) |
| H1           | 199393                        | 254.9                     | 3.07                          |
| H2           | 203685                        | 248.2                     | 3.31                          |
| AI           | 218934                        | 265.8                     | 3.10                          |

| Tracing Comparisons     |                     |                     |                     |                     |
|-------------------------|---------------------|---------------------|---------------------|---------------------|
| Difference Metric:      | Human-Human         |                     | Human-AI            |                     |
|                         | H1(ref)<br>H2(test) | H2(ref)<br>H1(test) | H1(ref)<br>AI(test) | H2(ref)<br>AI(test) |
| False Negative Area (%) | 8.6                 | 10.6                | 5.4                 | 4.9                 |
| False Positive Area (%) | 10.8                | 8.5                 | 15.2                | 12.3                |
| Relative Error (%)      | 2.2                 | 2.1                 | 9.8                 | 7.5                 |

| Blinded Attending Surgeon Review |              |                      |                      |                      |              |                         |
|----------------------------------|--------------|----------------------|----------------------|----------------------|--------------|-------------------------|
| Reviewer                         | PGT Estimate | H1 meets definition? | H2 meets definition? | AI meets definition? | Which is AI? | Which is most accurate? |
| 1                                | 70           | Yes                  | No                   | No                   | H1           | H2                      |
| 2                                | 10           | No                   | No                   | No                   | AI           | H2                      |
| 3                                | 30           | No                   | Yes                  | Yes                  | AI           | AI                      |

| Wound EMR Information |        |     |            |                |                   |                  |                  |                               |
|-----------------------|--------|-----|------------|----------------|-------------------|------------------|------------------|-------------------------------|
| Sequential Number     | Gender | Age | Wound Type | Wound Location | Wound Length (cm) | Wound Width (cm) | Wound Depth (cm) | Wound Area (cm <sup>2</sup> ) |
| 42                    | F      | 87  | VLU        | RLE med        | 1.4               | 0.8              | 0.1              | 1.12                          |

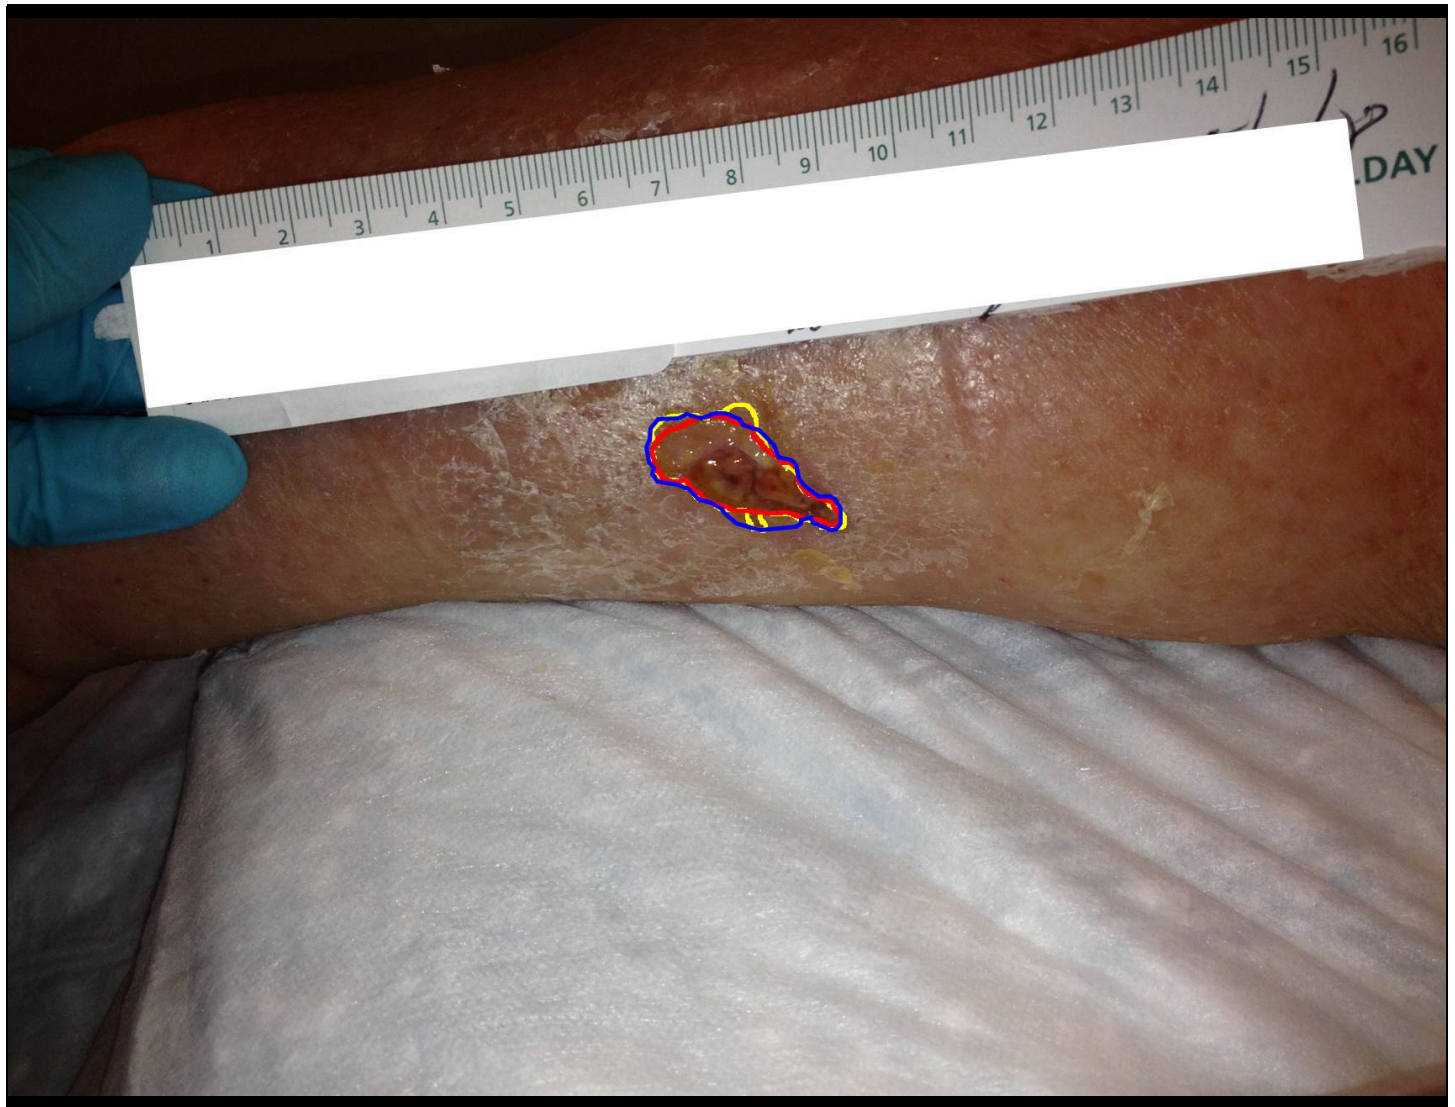

| Tracing Data |                               |                           |                               |
|--------------|-------------------------------|---------------------------|-------------------------------|
| Tracer:      | Wound Area (px <sup>2</sup> ) | Ruler Calibration (px/cm) | Wound Area (cm <sup>2</sup> ) |
| H1           | 17507                         | 88.8                      | 2.22                          |
| H2           | 15047                         | 91.1                      | 1.81                          |
| AI           | 19162                         | 87.5                      | 2.50                          |

| Tracing Comparisons     |                     |                     |                     |                     |
|-------------------------|---------------------|---------------------|---------------------|---------------------|
| Difference Metric:      | Human-Human         |                     | Human-AI            |                     |
|                         | H1(ref)<br>H2(test) | H2(ref)<br>H1(test) | H1(ref)<br>AI(test) | H2(ref)<br>AI(test) |
| False Negative Area (%) | 15.2                | 1.4                 | 4.7                 | 0.2                 |
| False Positive Area (%) | 1.2                 | 17.7                | 14.1                | 27.5                |
| Relative Error (%)      | 14.1                | 16.3                | 9.5                 | 27.3                |

| Blinded Attending Surgeon Review |              |                      |                      |                      |              |                         |
|----------------------------------|--------------|----------------------|----------------------|----------------------|--------------|-------------------------|
| Reviewer                         | PGT Estimate | H1 meets definition? | H2 meets definition? | AI meets definition? | Which is AI? | Which is most accurate? |
| 1                                | 0            | Yes                  | No                   | No                   | H1           | H2                      |
| 2                                | 0            | No                   | No                   | No                   | H2           | AI                      |
| 3                                | 10           | No                   | No                   | No                   | AI           | H1                      |

| Wound EMR Information |        |     |            |                |                   |                  |                  |                               |
|-----------------------|--------|-----|------------|----------------|-------------------|------------------|------------------|-------------------------------|
| Sequential Number     | Gender | Age | Wound Type | Wound Location | Wound Length (cm) | Wound Width (cm) | Wound Depth (cm) | Wound Area (cm <sup>2</sup> ) |
| 43                    | F      | 35  | lymphedem  | RLE            | 0.2               | 2.0              | 0.1              | 0.40                          |

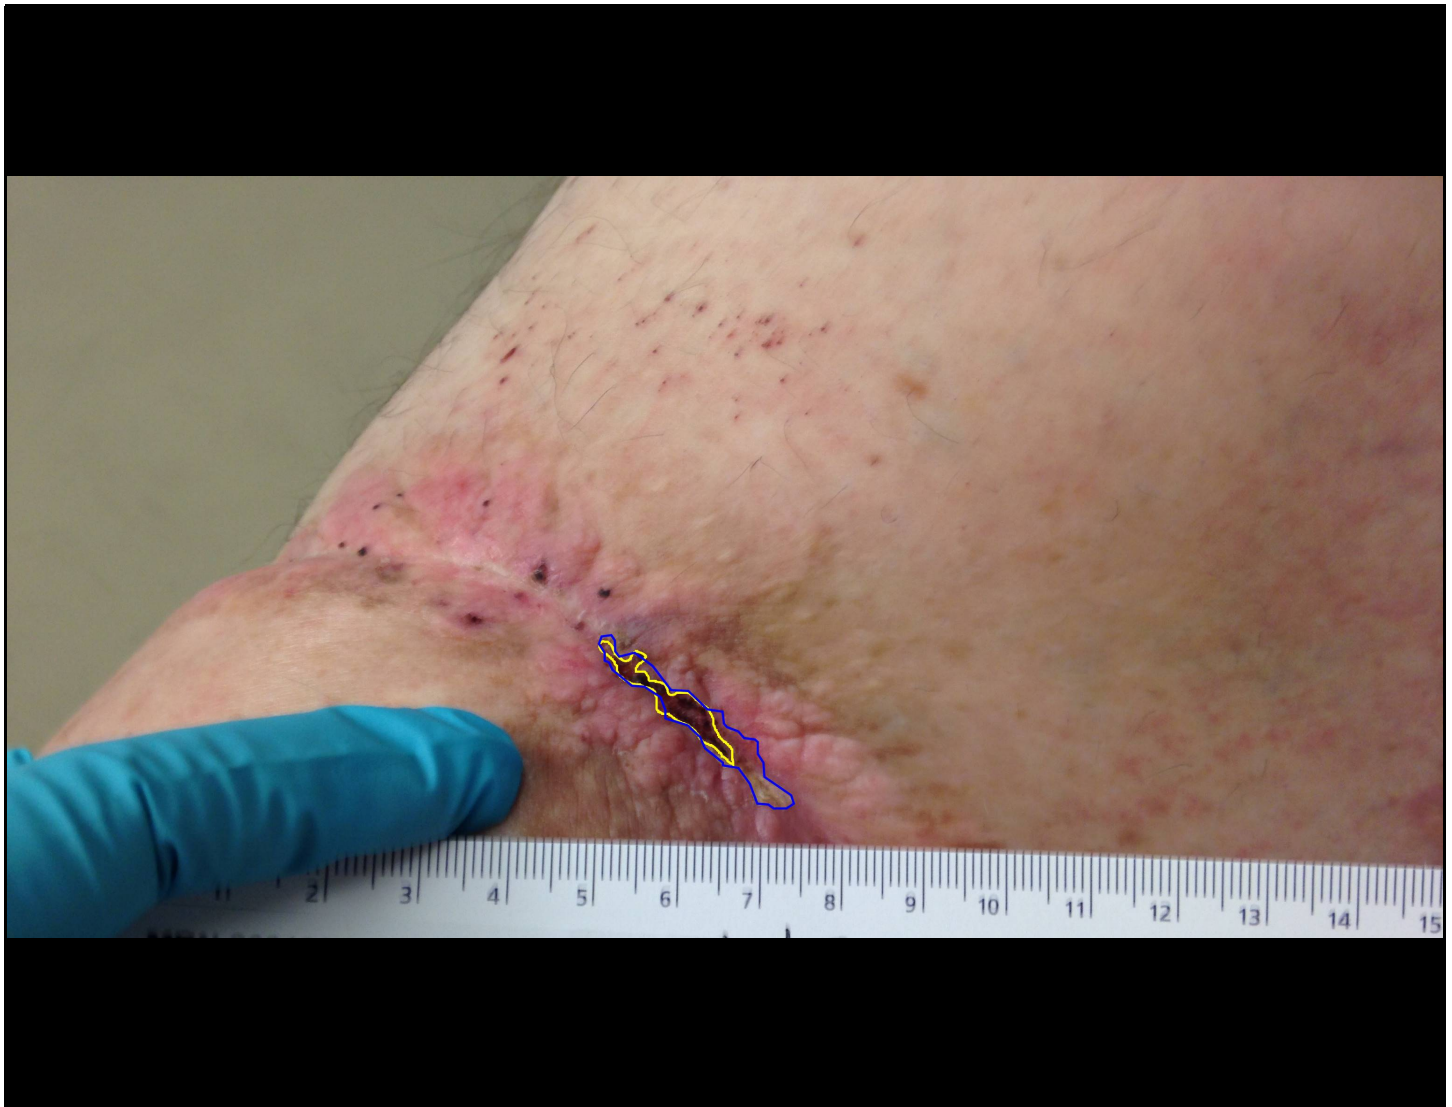

| Tracing Data |                               |                           |                               |
|--------------|-------------------------------|---------------------------|-------------------------------|
| Tracer:      | Wound Area (px <sup>2</sup> ) | Ruler Calibration (px/cm) | Wound Area (cm <sup>2</sup> ) |
| H1           | 15493                         | 196.8                     | 0.40                          |
| H2           | 0                             |                           | 0.00                          |
| AI           | 31854                         | 188.1                     | 0.90                          |

| Tracing Comparisons     |                     |                     |                     |                     |
|-------------------------|---------------------|---------------------|---------------------|---------------------|
| Difference Metric:      | Human-Human         |                     | Human-AI            |                     |
|                         | H1(ref)<br>H2(test) | H2(ref)<br>H1(test) | H1(ref)<br>AI(test) | H2(ref)<br>AI(test) |
| False Negative Area (%) |                     |                     | 5.7                 |                     |
| False Positive Area (%) |                     |                     | 111.3               |                     |
| Relative Error (%)      |                     |                     | 105.6               |                     |

| Blinded Attending Surgeon Review |              |                      |                      |                      |              |                         |
|----------------------------------|--------------|----------------------|----------------------|----------------------|--------------|-------------------------|
| Reviewer                         | PGT Estimate | H1 meets definition? | H2 meets definition? | AI meets definition? | Which is AI? | Which is most accurate? |
| 1                                |              | Yes                  | Yes                  | Yes                  | H1           | 0                       |
| 2                                |              | No                   | No                   | No                   | H2           | H2                      |
| 3                                | 0            | No                   | Yes                  | No                   | AI           | H2                      |

| Wound EMR Information |        |     |            |                |                   |                  |                  |                               |
|-----------------------|--------|-----|------------|----------------|-------------------|------------------|------------------|-------------------------------|
| Sequential Number     | Gender | Age | Wound Type | Wound Location | Wound Length (cm) | Wound Width (cm) | Wound Depth (cm) | Wound Area (cm <sup>2</sup> ) |
| 44                    | M      | 89  | DFU        | L 4th toe      | 1.2               | 1.3              | 0.1              | 1.56                          |

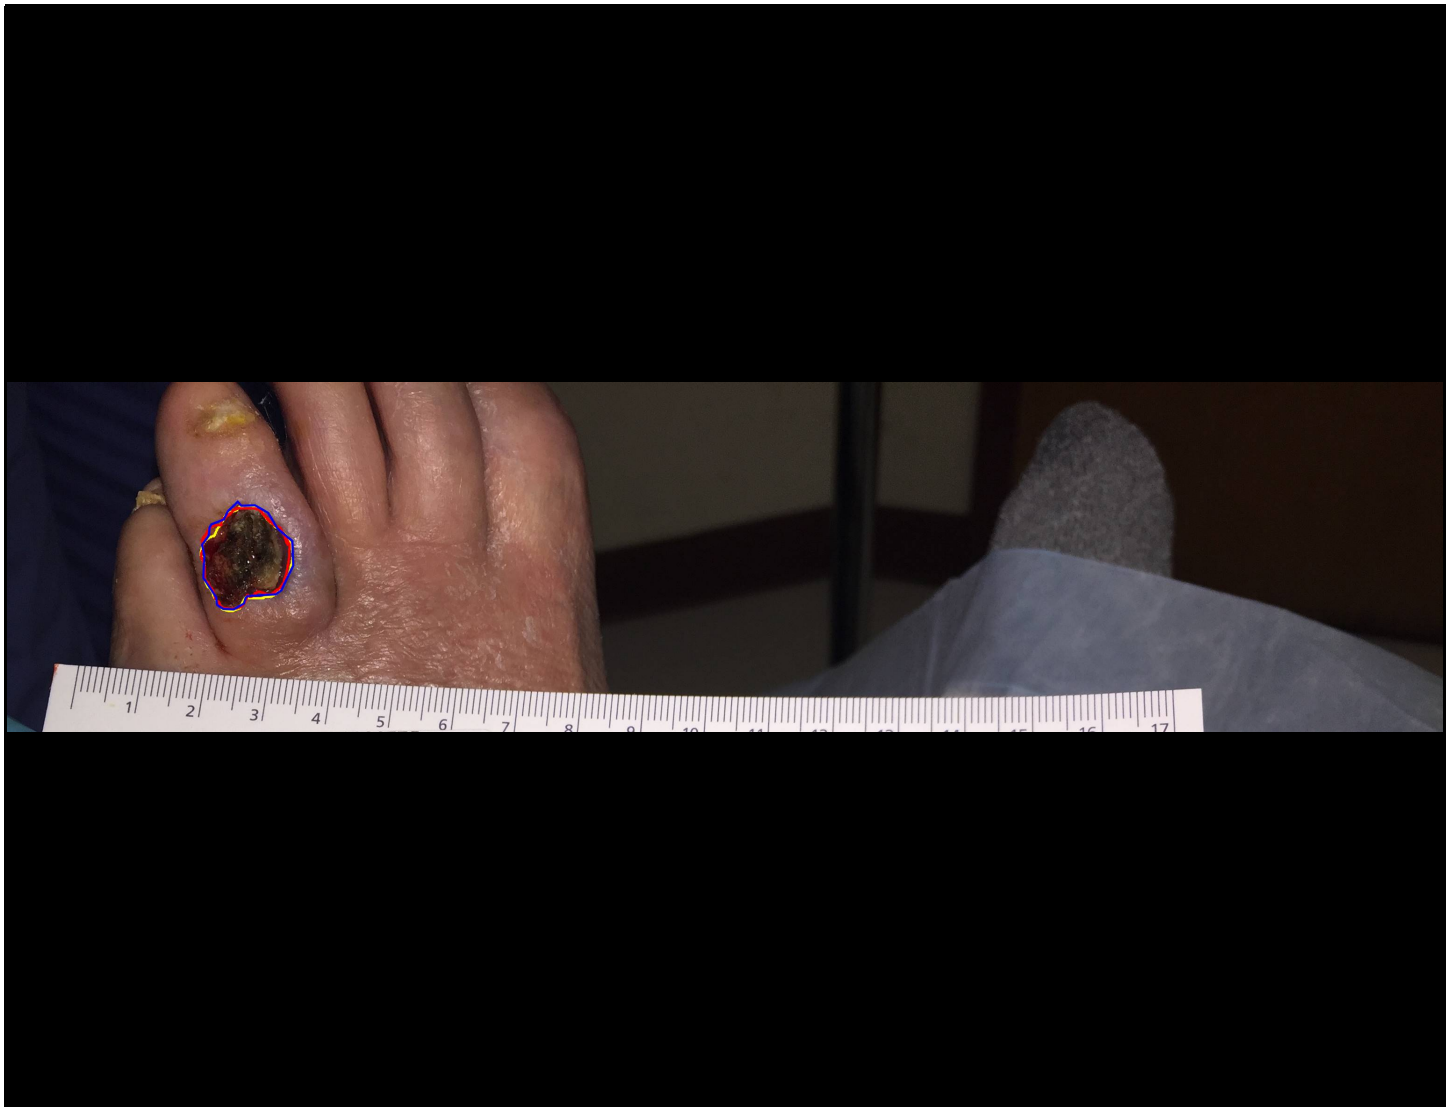

| Tracing Data |                               |                           |                               |
|--------------|-------------------------------|---------------------------|-------------------------------|
| Tracer:      | Wound Area (px <sup>2</sup> ) | Ruler Calibration (px/cm) | Wound Area (cm <sup>2</sup> ) |
| H1           | 34496                         | 143.3                     | 1.68                          |
| H2           | 33403                         | 143.7                     | 1.62                          |
| AI           | 35522                         | 144.6                     | 1.70                          |

| Tracing Comparisons     |                     |                     |                     |                     |
|-------------------------|---------------------|---------------------|---------------------|---------------------|
| Difference Metric:      | Human-Human         |                     | Human-AI            |                     |
|                         | H1(ref)<br>H2(test) | H2(ref)<br>H1(test) | H1(ref)<br>AI(test) | H2(ref)<br>AI(test) |
| False Negative Area (%) | 5.7                 | 2.6                 | 2.4                 | 1.7                 |
| False Positive Area (%) | 2.5                 | 5.9                 | 5.3                 | 8.0                 |
| Relative Error (%)      | 3.2                 | 3.3                 | 3.0                 | 6.3                 |

| Blinded Attending Surgeon Review |              |                      |                      |                      |              |                         |
|----------------------------------|--------------|----------------------|----------------------|----------------------|--------------|-------------------------|
| Reviewer                         | PGT Estimate | H1 meets definition? | H2 meets definition? | AI meets definition? | Which is AI? | Which is most accurate? |
| 1                                | 0            | Yes                  | Yes                  | Yes                  | AI           | H1                      |
| 2                                | 0            | Yes                  | Yes                  | Yes                  | H1           | AI                      |
| 3                                | 20           | Yes                  | Yes                  | Yes                  | H1           | AI                      |

| Wound EMR Information |        |     |            |                |                   |                  |                  |                               |
|-----------------------|--------|-----|------------|----------------|-------------------|------------------|------------------|-------------------------------|
| Sequential Number     | Gender | Age | Wound Type | Wound Location | Wound Length (cm) | Wound Width (cm) | Wound Depth (cm) | Wound Area (cm <sup>2</sup> ) |
| 45                    | M      | 85  | Trauma     | LLE lat        | 7.6               | 3.0              | 0.1              | 22.80                         |

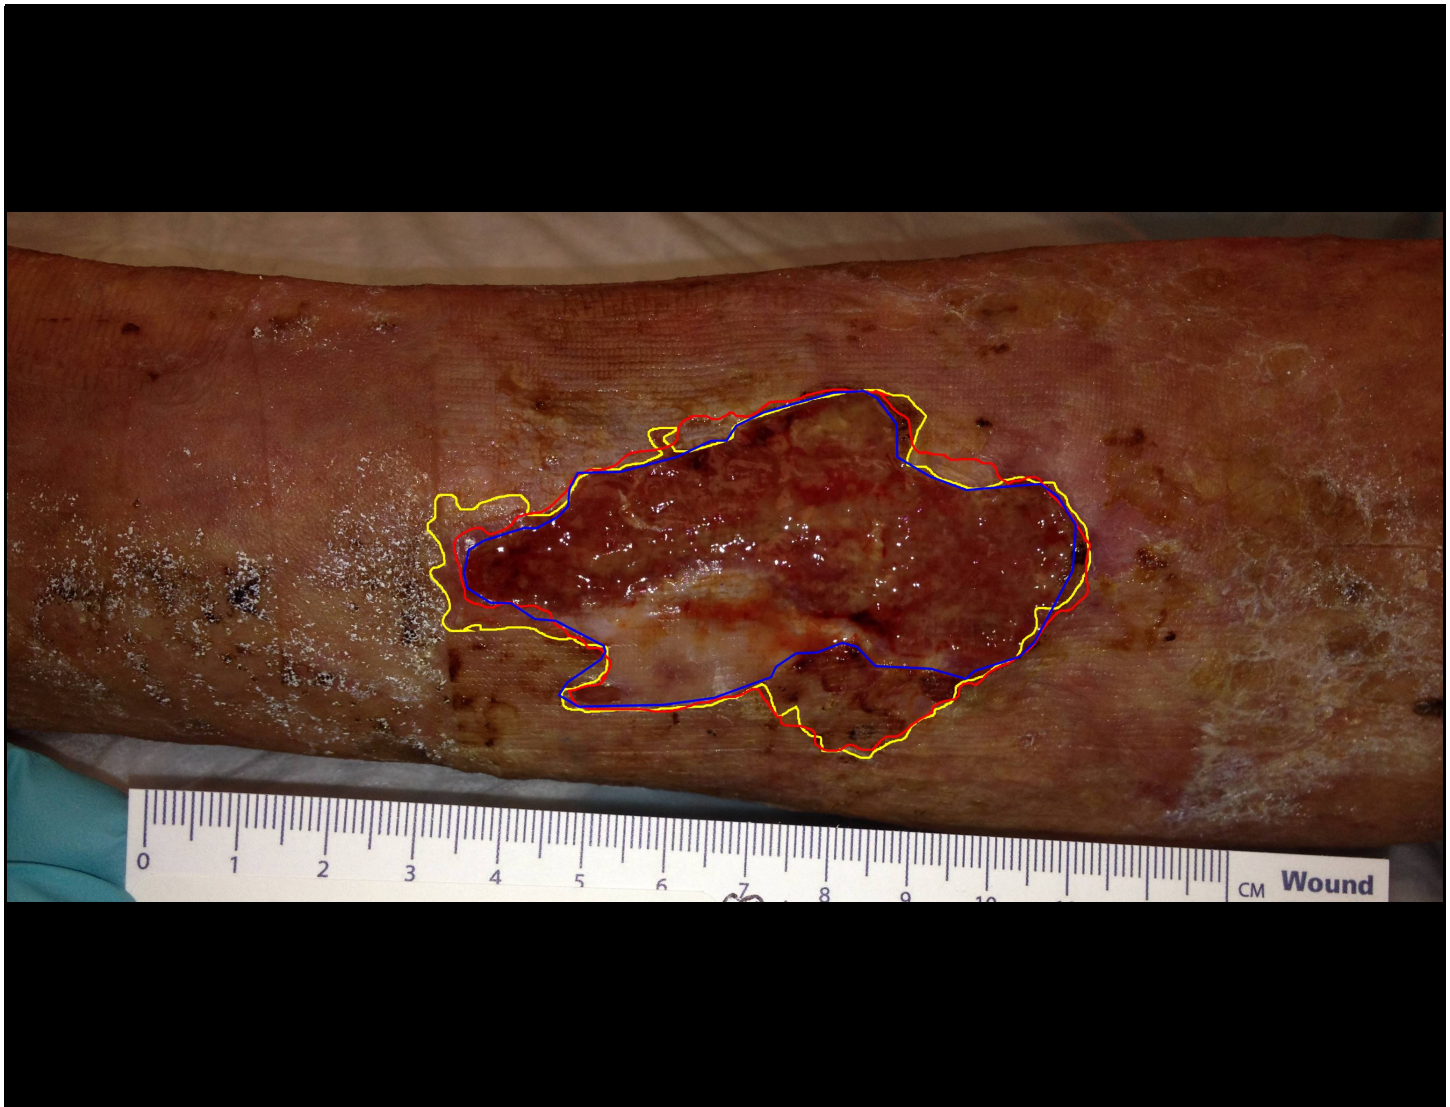

| Tracing Data |                               |                           |                               |
|--------------|-------------------------------|---------------------------|-------------------------------|
| Tracer:      | Wound Area (px <sup>2</sup> ) | Ruler Calibration (px/cm) | Wound Area (cm <sup>2</sup> ) |
| H1           | 749519                        | 195.1                     | 19.70                         |
| H2           | 734496                        | 187.1                     | 20.97                         |
| AI           | 613744                        | 210.1                     | 13.90                         |

| Tracing Comparisons     |                     |                     |                     |                     |
|-------------------------|---------------------|---------------------|---------------------|---------------------|
| Difference Metric:      | Human-Human         |                     | Human-AI            |                     |
|                         | H1(ref)<br>H2(test) | H2(ref)<br>H1(test) | H1(ref)<br>AI(test) | H2(ref)<br>AI(test) |
| False Negative Area (%) | 6.8                 | 4.9                 | 19.1                | 17.3                |
| False Positive Area (%) | 4.8                 | 7.0                 | 1.0                 | 0.8                 |
| Relative Error (%)      | 2.0                 | 2.0                 | 18.1                | 16.4                |

| Blinded Attending Surgeon Review |              |                      |                      |                      |              |                         |
|----------------------------------|--------------|----------------------|----------------------|----------------------|--------------|-------------------------|
| Reviewer                         | PGT Estimate | H1 meets definition? | H2 meets definition? | AI meets definition? | Which is AI? | Which is most accurate? |
| 1                                | 80           | No                   | No                   | No                   | AI           | None                    |
| 2                                | 20           | No                   | No                   | No                   | AI           | H2                      |
| 3                                | 80           | Yes                  | Yes                  | Yes                  | H2           | H2                      |

| Wound EMR Information |        |     |            |                |                   |                  |                  |                               |
|-----------------------|--------|-----|------------|----------------|-------------------|------------------|------------------|-------------------------------|
| Sequential Number     | Gender | Age | Wound Type | Wound Location | Wound Length (cm) | Wound Width (cm) | Wound Depth (cm) | Wound Area (cm <sup>2</sup> ) |
| 46                    | F      | 65  | PU         | L buttock      | 7.0               | 6.5              | 5.4              | 45.50                         |

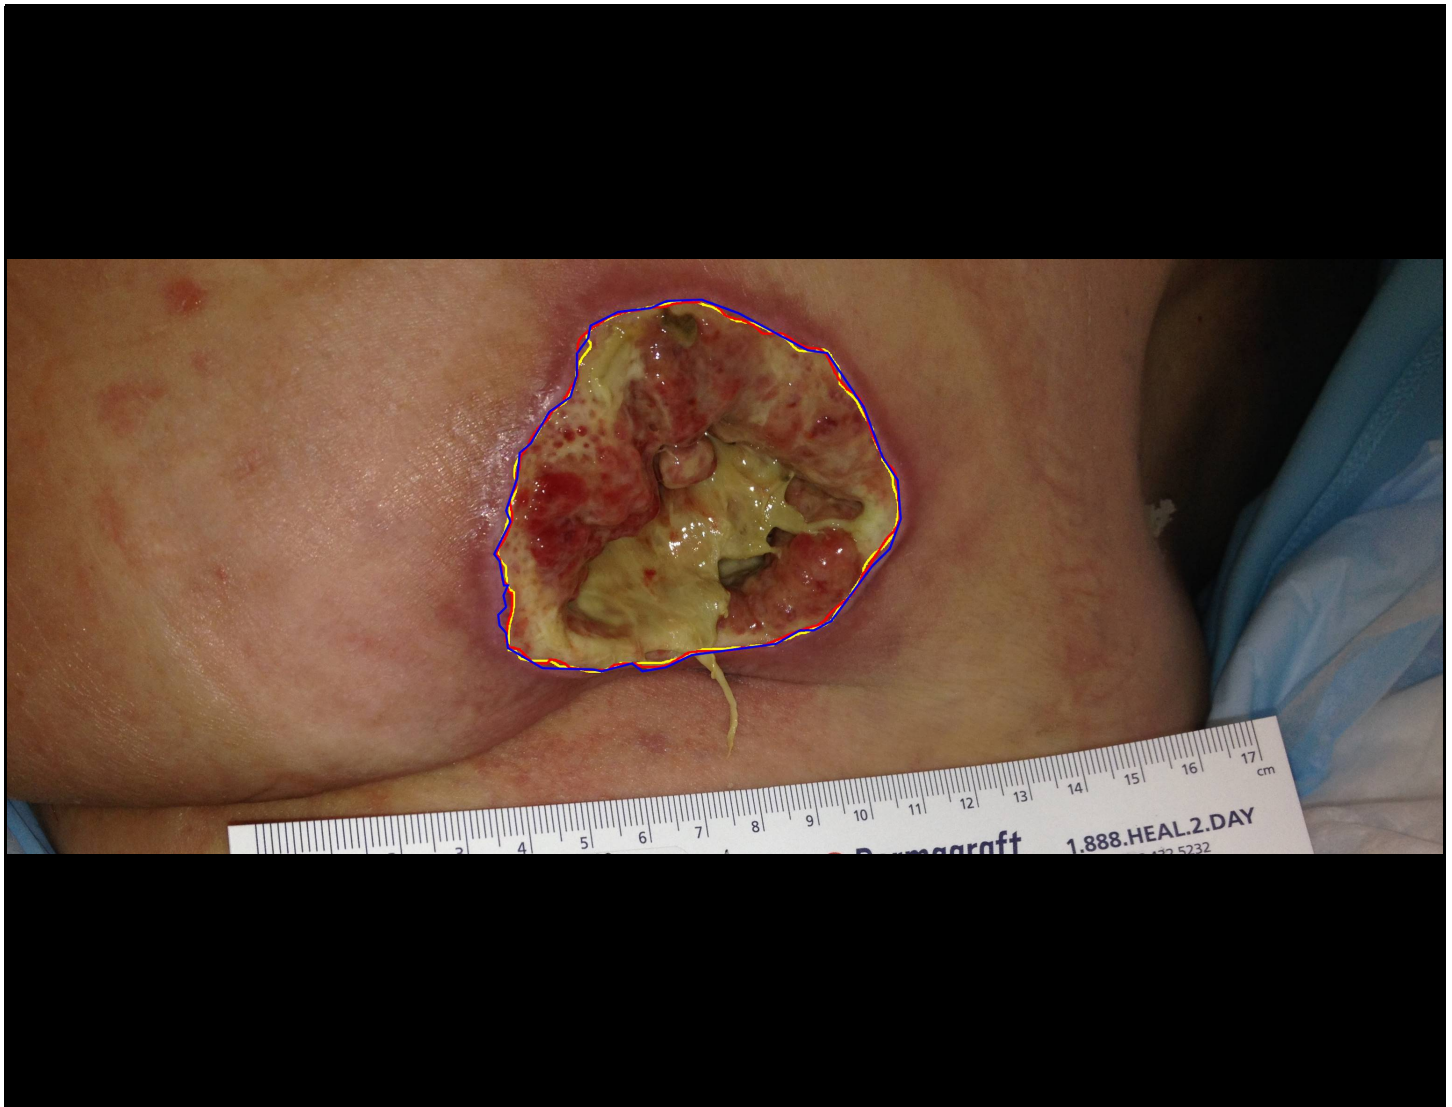

| Tracing Data |                               |                           |                               |
|--------------|-------------------------------|---------------------------|-------------------------------|
| Tracer:      | Wound Area (px <sup>2</sup> ) | Ruler Calibration (px/cm) | Wound Area (cm <sup>2</sup> ) |
| H1           | 566235                        | 127.1                     | 35.04                         |
| H2           | 568990                        | 131.0                     | 33.16                         |
| AI           | 579463                        | 148.4                     | 26.30                         |

| Tracing Comparisons     |                     |                     |                     |                     |
|-------------------------|---------------------|---------------------|---------------------|---------------------|
| Difference Metric:      | Human-Human         |                     | Human-AI            |                     |
|                         | H1(ref)<br>H2(test) | H2(ref)<br>H1(test) | H1(ref)<br>AI(test) | H2(ref)<br>AI(test) |
| False Negative Area (%) | 1.0                 | 1.4                 | 0.3                 | 0.4                 |
| False Positive Area (%) | 1.4                 | 1.0                 | 2.6                 | 2.2                 |
| Relative Error (%)      | 0.5                 | 0.5                 | 2.3                 | 1.8                 |

| Blinded Attending Surgeon Review |              |                      |                      |                      |              |                         |
|----------------------------------|--------------|----------------------|----------------------|----------------------|--------------|-------------------------|
| Reviewer                         | PGT Estimate | H1 meets definition? | H2 meets definition? | AI meets definition? | Which is AI? | Which is most accurate? |
| 1                                | 10           | Yes                  | Yes                  | Yes                  | H2           | AI                      |
| 2                                | 0            | Yes                  | Yes                  | Yes                  | AI           | AI                      |
| 3                                | 70           | Yes                  | Yes                  | Yes                  | H2           | H1                      |



| Wound EMR Information |        |     |            |                |                   |                  |                  |                               |
|-----------------------|--------|-----|------------|----------------|-------------------|------------------|------------------|-------------------------------|
| Sequential Number     | Gender | Age | Wound Type | Wound Location | Wound Length (cm) | Wound Width (cm) | Wound Depth (cm) | Wound Area (cm <sup>2</sup> ) |
| 47                    | F      | 82  | VLU        | LLE ant        | 0.0               | 0.0              | 0.0              | 0.00                          |

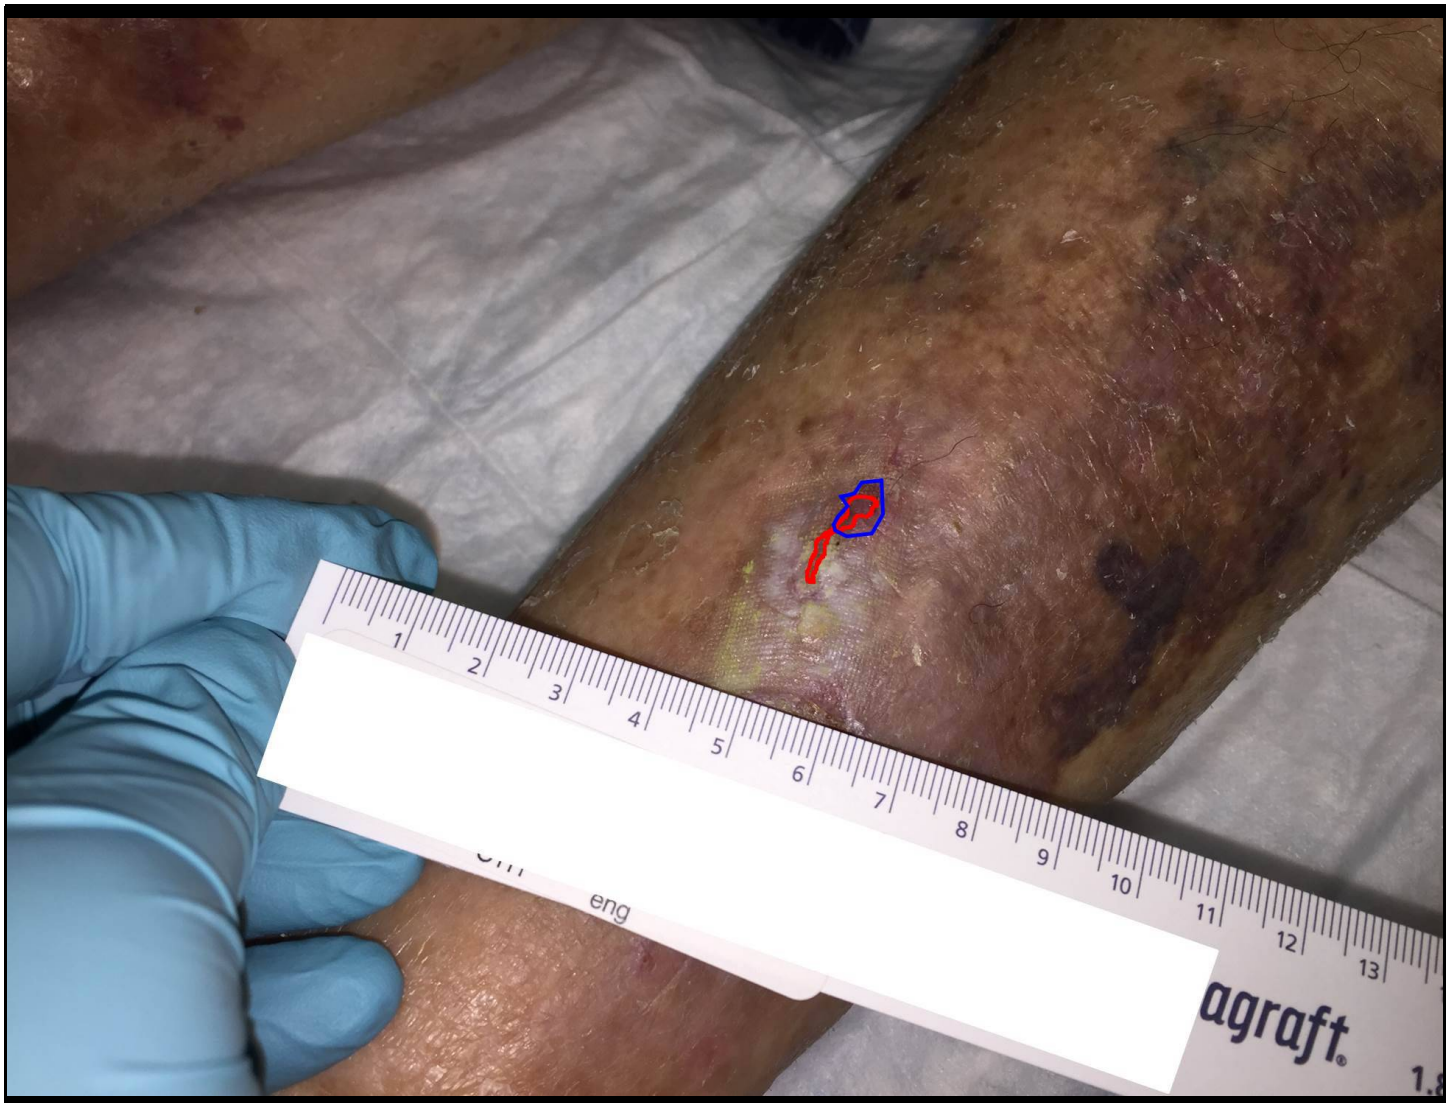

| Tracing Data |                               |                           |                               |
|--------------|-------------------------------|---------------------------|-------------------------------|
| Tracer:      | Wound Area (px <sup>2</sup> ) | Ruler Calibration (px/cm) | Wound Area (cm <sup>2</sup> ) |
| H1           | 0                             |                           | 0.00                          |
| H2           | 1926                          | 115.7                     | 0.14                          |
| AI           | 3497                          | 108.0                     | 0.30                          |

| Tracing Comparisons     |                     |                     |                     |                     |
|-------------------------|---------------------|---------------------|---------------------|---------------------|
| Difference Metric:      | Human-Human         |                     | Human-AI            |                     |
|                         | H1(ref)<br>H2(test) | H2(ref)<br>H1(test) | H1(ref)<br>AI(test) | H2(ref)<br>AI(test) |
| False Negative Area (%) |                     |                     |                     | 37.7                |
| False Positive Area (%) |                     |                     |                     | 119.3               |
| Relative Error (%)      |                     |                     |                     | 81.6                |

| Blinded Attending Surgeon Review |              |                      |                      |                      |              |                         |
|----------------------------------|--------------|----------------------|----------------------|----------------------|--------------|-------------------------|
| Reviewer                         | PGT Estimate | H1 meets definition? | H2 meets definition? | AI meets definition? | Which is AI? | Which is most accurate? |
| 1                                |              | Yes                  | Yes                  | Yes                  | H2           | 0                       |
| 2                                | healed       | Yes                  | No                   | No                   | AI           | AI                      |
| 3                                | 0            | Yes                  | No                   | No                   | H1           | AI                      |

| Wound EMR Information |        |     |            |                |                   |                  |                  |                               |
|-----------------------|--------|-----|------------|----------------|-------------------|------------------|------------------|-------------------------------|
| Sequential Number     | Gender | Age | Wound Type | Wound Location | Wound Length (cm) | Wound Width (cm) | Wound Depth (cm) | Wound Area (cm <sup>2</sup> ) |
| 48                    | F      | 69  | PU         | L heel         | 1.9               | 2.0              |                  | 3.80                          |

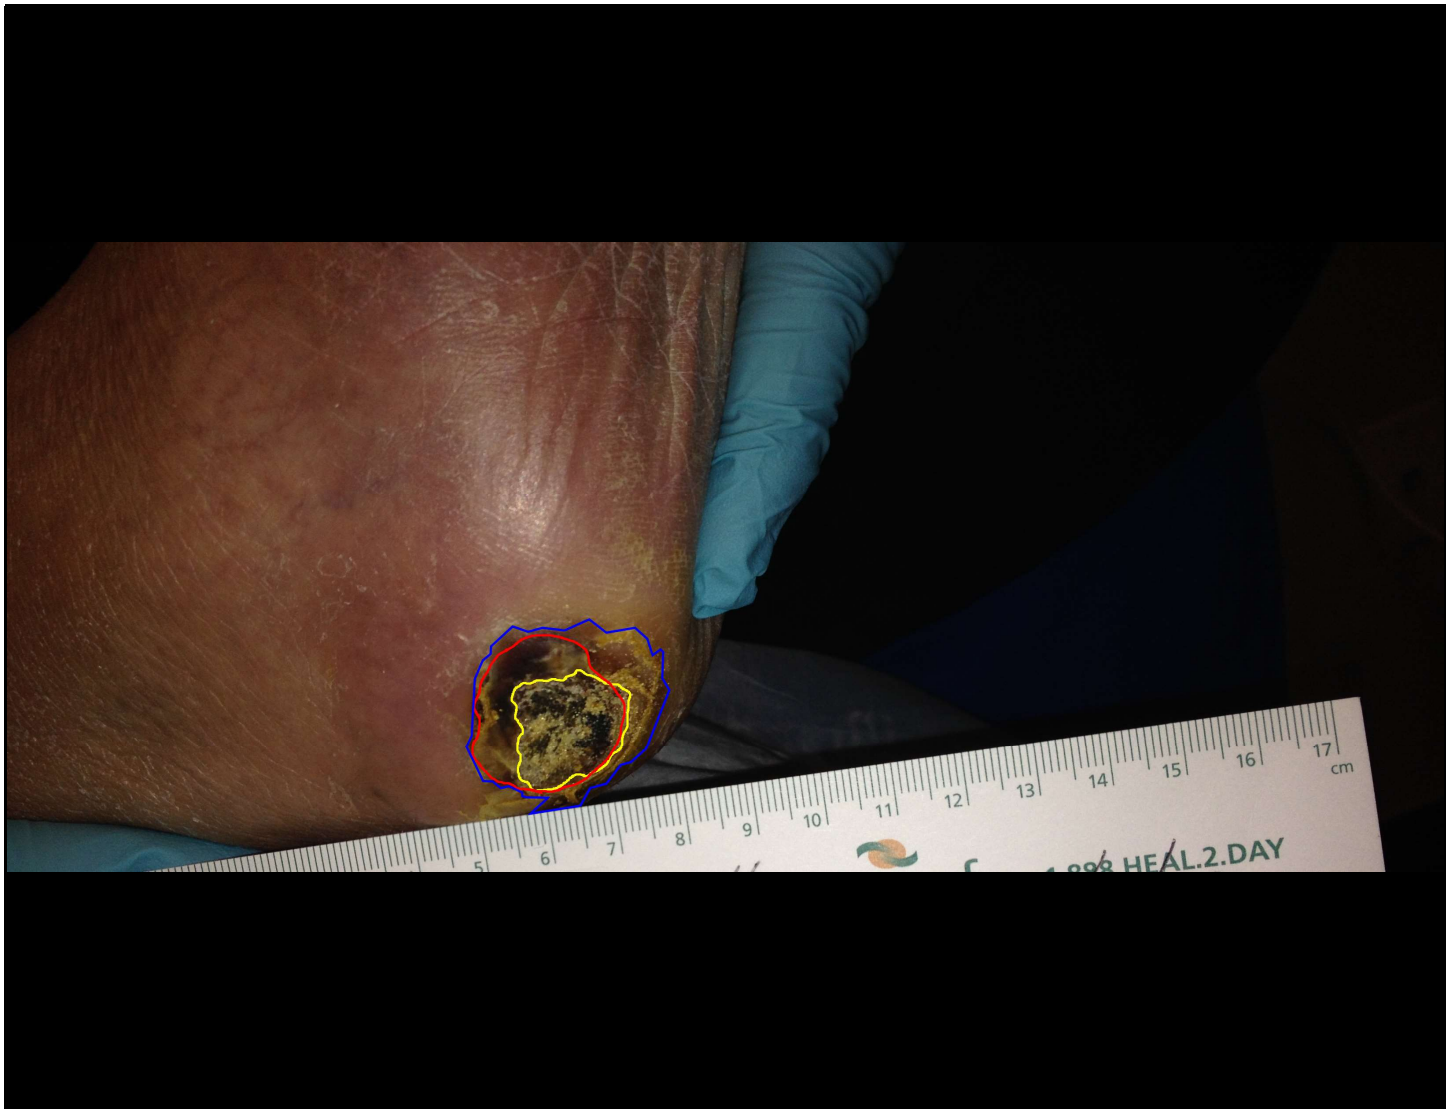

| Tracing Data |                               |                           |                               |
|--------------|-------------------------------|---------------------------|-------------------------------|
| Tracer:      | Wound Area (px <sup>2</sup> ) | Ruler Calibration (px/cm) | Wound Area (cm <sup>2</sup> ) |
| H1           | 53917                         | 155.8                     | 2.22                          |
| H2           | 93147                         | 155.4                     | 3.86                          |
| AI           | 145425                        | 157.0                     | 5.90                          |

| Tracing Comparisons     |                     |                     |                     |                     |
|-------------------------|---------------------|---------------------|---------------------|---------------------|
| Difference Metric:      | Human-Human         |                     | Human-AI            |                     |
|                         | H1(ref)<br>H2(test) | H2(ref)<br>H1(test) | H1(ref)<br>AI(test) | H2(ref)<br>AI(test) |
| False Negative Area (%) | 4.2                 | 44.6                | 0.0                 | 0.0                 |
| False Positive Area (%) | 77.0                | 2.5                 | 169.7               | 56.1                |
| Relative Error (%)      | 72.8                | 42.1                | 169.7               | 56.1                |

| Blinded Attending Surgeon Review |              |                      |                      |                      |              |                         |
|----------------------------------|--------------|----------------------|----------------------|----------------------|--------------|-------------------------|
| Reviewer                         | PGT Estimate | H1 meets definition? | H2 meets definition? | AI meets definition? | Which is AI? | Which is most accurate? |
| 1                                | 0            | No                   | No                   | Yes                  | H2           | AI                      |
| 2                                | 0            | No                   | Yes                  | No                   | AI           | H1                      |
| 3                                | 20           | Yes                  | Yes                  | No                   | H1           | H2                      |

| Wound EMR Information |        |     |            |                |                   |                  |                  |                               |
|-----------------------|--------|-----|------------|----------------|-------------------|------------------|------------------|-------------------------------|
| Sequential Number     | Gender | Age | Wound Type | Wound Location | Wound Length (cm) | Wound Width (cm) | Wound Depth (cm) | Wound Area (cm <sup>2</sup> ) |
| 49                    | M      | 69  | DFU        | R plantar      | 1.0               | 1.0              | 0.1              | 1.00                          |

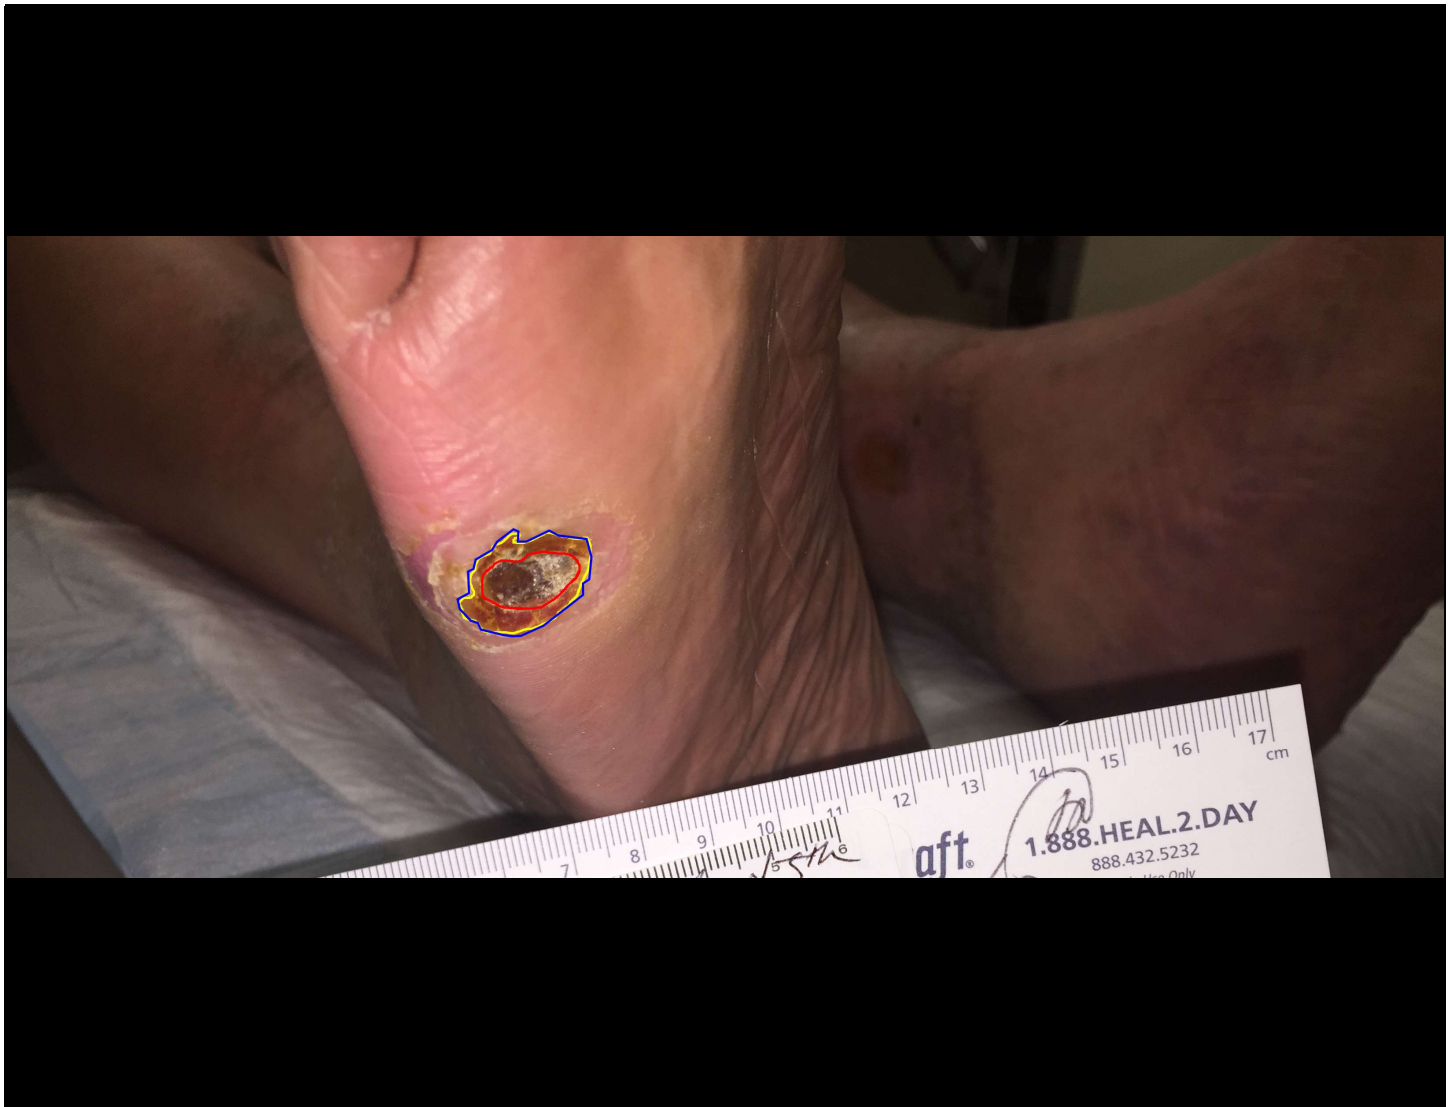

| Tracing Data |                               |                           |                               |
|--------------|-------------------------------|---------------------------|-------------------------------|
| Tracer:      | Wound Area (px <sup>2</sup> ) | Ruler Calibration (px/cm) | Wound Area (cm <sup>2</sup> ) |
| H1           | 48169                         | 160.1                     | 1.88                          |
| H2           | 21199                         | 161.1                     | 0.82                          |
| AI           | 51313                         | 160.2                     | 2.00                          |

| Tracing Comparisons     |                     |                     |                     |                     |
|-------------------------|---------------------|---------------------|---------------------|---------------------|
| Difference Metric:      | Human-Human         |                     | Human-AI            |                     |
|                         | H1(ref)<br>H2(test) | H2(ref)<br>H1(test) | H1(ref)<br>AI(test) | H2(ref)<br>AI(test) |
| False Negative Area (%) | 56.0                | 0.0                 | 0.5                 | 0.0                 |
| False Positive Area (%) | 0.0                 | 127.2               | 7.1                 | 142.0               |
| Relative Error (%)      | 56.0                | 127.2               | 6.5                 | 142.1               |

| Blinded Attending Surgeon Review |              |                      |                      |                      |              |                         |
|----------------------------------|--------------|----------------------|----------------------|----------------------|--------------|-------------------------|
| Reviewer                         | PGT Estimate | H1 meets definition? | H2 meets definition? | AI meets definition? | Which is AI? | Which is most accurate? |
| 1                                | 0            | No                   | Yes                  | No                   | H2           | H2                      |
| 2                                | 0            | No                   | Yes                  | No                   | H1           | H2                      |
| 3                                | 30           | No                   | Yes                  | No                   | H1           | H2                      |

| Wound EMR Information |        |     |            |                |                   |                  |                  |                               |
|-----------------------|--------|-----|------------|----------------|-------------------|------------------|------------------|-------------------------------|
| Sequential Number     | Gender | Age | Wound Type | Wound Location | Wound Length (cm) | Wound Width (cm) | Wound Depth (cm) | Wound Area (cm <sup>2</sup> ) |
| 50                    | M      | 70  | DFU        | L plantar      | 1.3               | 1.0              | 0.1              | 1.30                          |

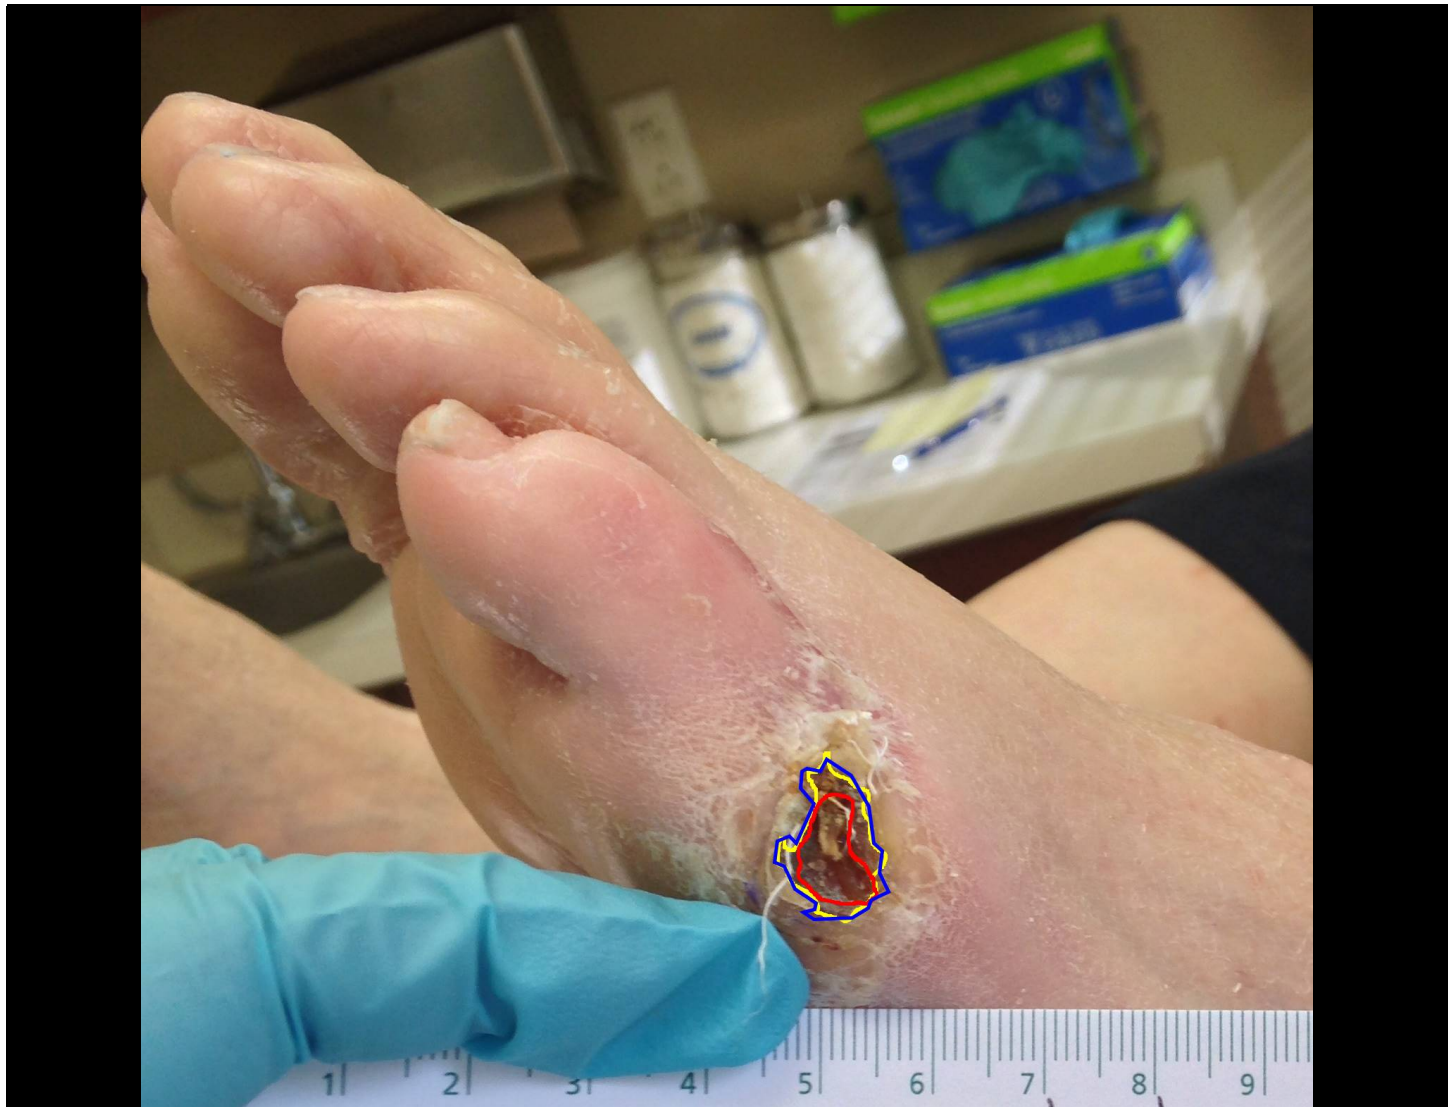

| Tracing Data |                               |                           |                               |
|--------------|-------------------------------|---------------------------|-------------------------------|
| Tracer:      | Wound Area (px <sup>2</sup> ) | Ruler Calibration (px/cm) | Wound Area (cm <sup>2</sup> ) |
| H1           | 19416                         | 157.8                     | 0.78                          |
| H2           | 10878                         | 160.7                     | 0.42                          |
| AI           | 22188                         | 157.0                     | 0.90                          |

| Tracing Comparisons     |                     |                     |                     |                     |
|-------------------------|---------------------|---------------------|---------------------|---------------------|
| Difference Metric:      | Human-Human         |                     | Human-AI            |                     |
|                         | H1(ref)<br>H2(test) | H2(ref)<br>H1(test) | H1(ref)<br>AI(test) | H2(ref)<br>AI(test) |
| False Negative Area (%) | 44.2                | 0.4                 | 1.9                 | 0.0                 |
| False Positive Area (%) | 0.2                 | 78.9                | 16.2                | 104.0               |
| Relative Error (%)      | 44.0                | 78.5                | 14.3                | 104.0               |

| Blinded Attending Surgeon Review |              |                      |                      |                      |              |                         |
|----------------------------------|--------------|----------------------|----------------------|----------------------|--------------|-------------------------|
| Reviewer                         | PGT Estimate | H1 meets definition? | H2 meets definition? | AI meets definition? | Which is AI? | Which is most accurate? |
| 1                                | 0            | No                   | Yes                  | No                   | H1           | H1                      |
| 2                                | 0            | No                   | No                   | Yes                  | H2           | AI                      |
| 3                                | 0            | Yes                  | No                   | Yes                  | AI           | H2                      |

| Wound EMR Information |        |     |            |                |                   |                  |                  |                               |
|-----------------------|--------|-----|------------|----------------|-------------------|------------------|------------------|-------------------------------|
| Sequential Number     | Gender | Age | Wound Type | Wound Location | Wound Length (cm) | Wound Width (cm) | Wound Depth (cm) | Wound Area (cm <sup>2</sup> ) |
| 51                    | F      | 77  | Trauma     | RLE            | 3.9               | 3.5              | 0.2              | 13.65                         |

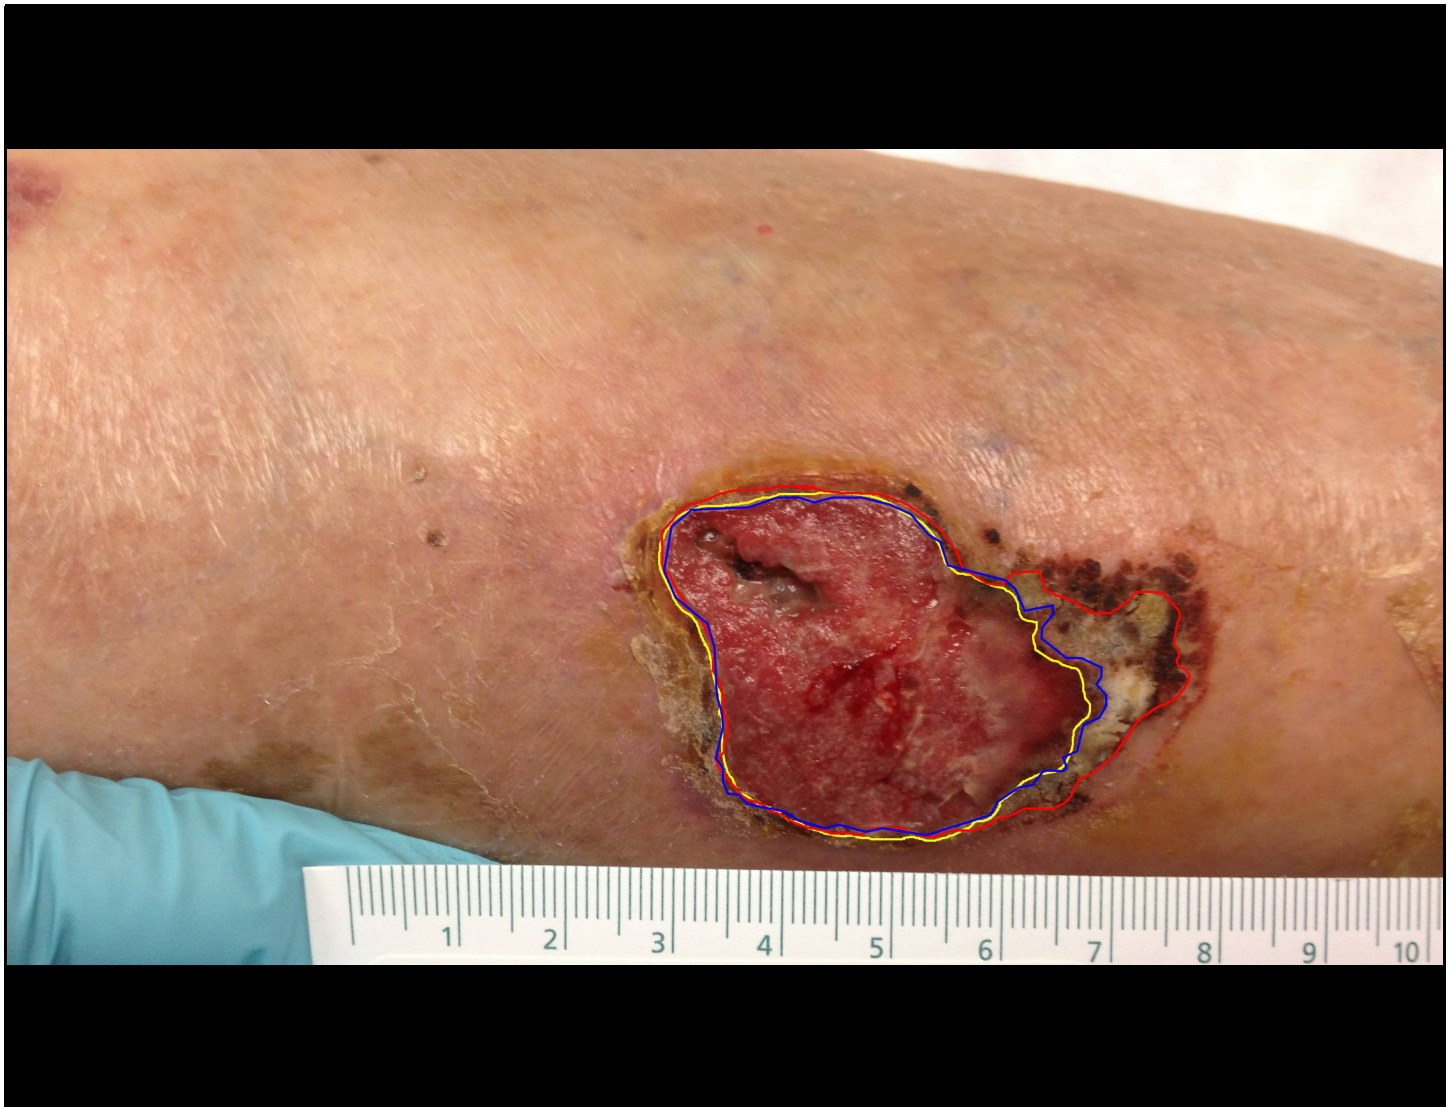

| Tracing Data |                               |                           |                               |
|--------------|-------------------------------|---------------------------|-------------------------------|
| Tracer:      | Wound Area (px <sup>2</sup> ) | Ruler Calibration (px/cm) | Wound Area (cm <sup>2</sup> ) |
| H1           | 532921                        | 249.4                     | 8.57                          |
| H2           | 640841                        | 250.7                     | 10.19                         |
| AI           | 533531                        | 243.5                     | 9.00                          |

| Tracing Comparisons     |                     |                     |                     |                     |
|-------------------------|---------------------|---------------------|---------------------|---------------------|
| Difference Metric:      | Human-Human         |                     | Human-AI            |                     |
|                         | H1(ref)<br>H2(test) | H2(ref)<br>H1(test) | H1(ref)<br>AI(test) | H2(ref)<br>AI(test) |
| False Negative Area (%) | 1.7                 | 18.3                | 3.2                 | 17.6                |
| False Positive Area (%) | 22.0                | 1.5                 | 3.4                 | 0.8                 |
| Relative Error (%)      | 20.3                | 16.8                | 0.1                 | 16.7                |

| Blinded Attending Surgeon Review |              |                      |                      |                      |              |                         |
|----------------------------------|--------------|----------------------|----------------------|----------------------|--------------|-------------------------|
| Reviewer                         | PGT Estimate | H1 meets definition? | H2 meets definition? | AI meets definition? | Which is AI? | Which is most accurate? |
| 1                                | 70           | No                   | Yes                  | No                   | H1           | AI                      |
| 2                                | 100          | No                   | No                   | No                   | AI           | H1                      |
| 3                                | 90           | Yes                  | No                   | Yes                  | H2           | H1                      |

| Wound EMR Information |        |     |            |                |                   |                  |                  |                               |
|-----------------------|--------|-----|------------|----------------|-------------------|------------------|------------------|-------------------------------|
| Sequential Number     | Gender | Age | Wound Type | Wound Location | Wound Length (cm) | Wound Width (cm) | Wound Depth (cm) | Wound Area (cm <sup>2</sup> ) |
| 52                    | F      | 62  | VLU        | RLE med        | 1.8               | 2.0              | 0.2              | 3.60                          |

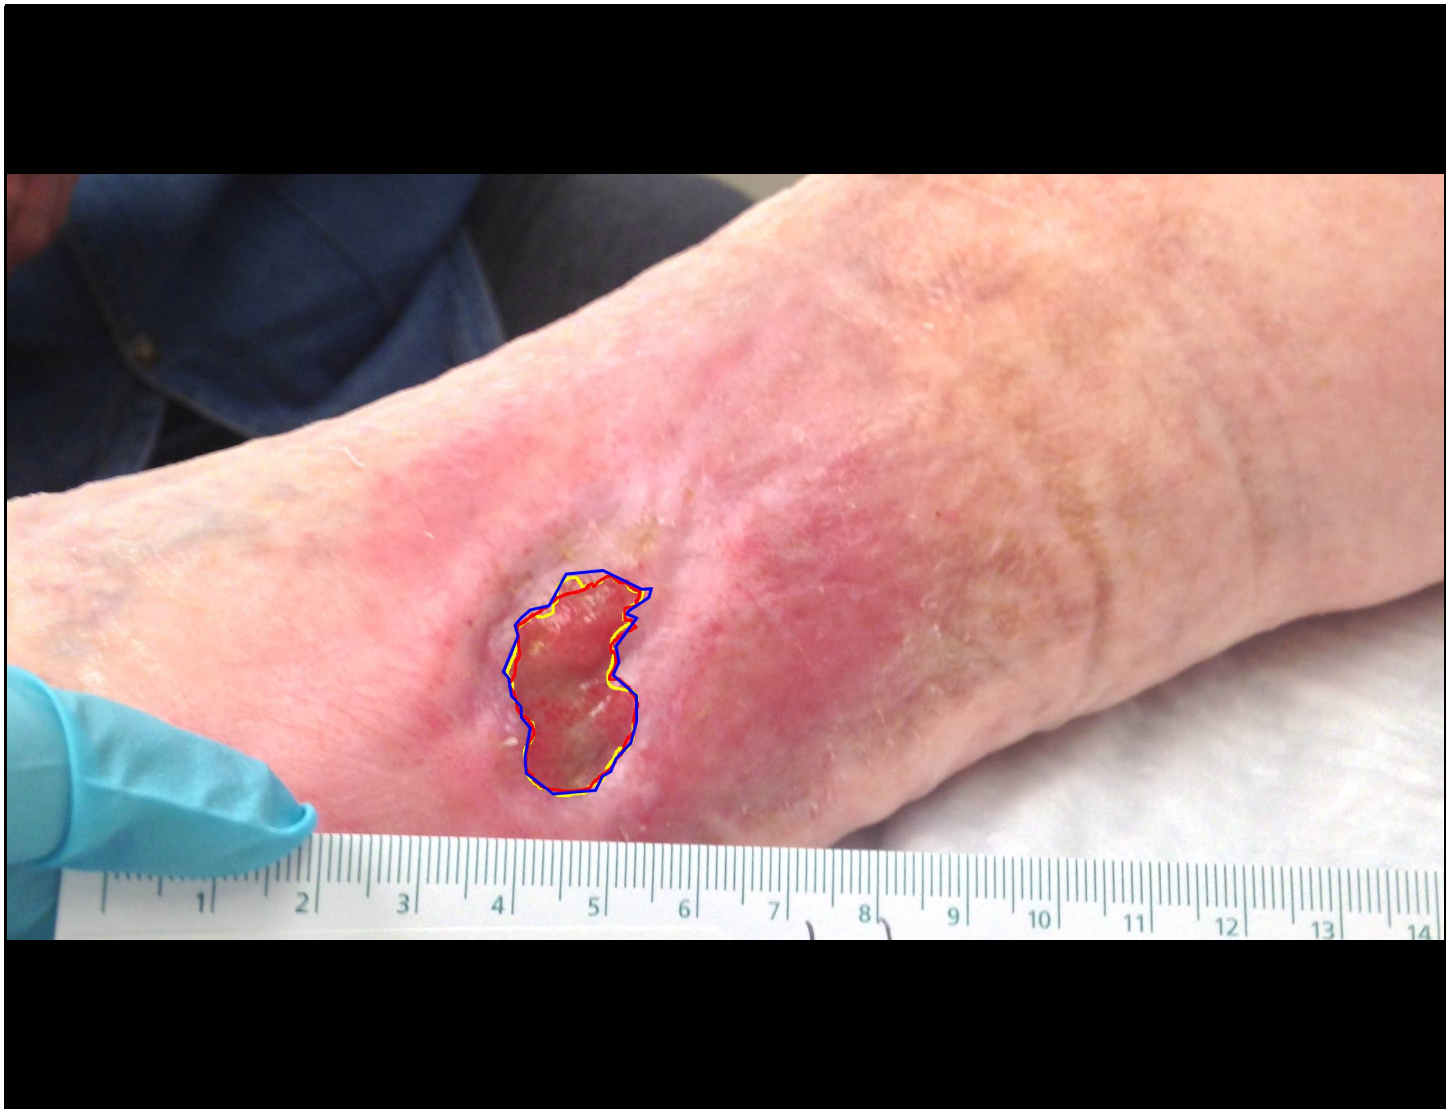

| Tracing Data |                               |                           |                               |
|--------------|-------------------------------|---------------------------|-------------------------------|
| Tracer:      | Wound Area (px <sup>2</sup> ) | Ruler Calibration (px/cm) | Wound Area (cm <sup>2</sup> ) |
| H1           | 57333                         | 159.3                     | 2.26                          |
| H2           | 56712                         | 157.1                     | 2.30                          |
| AI           | 62831                         | 169.0                     | 2.20                          |

| Tracing Comparisons     |                     |                     |                     |                     |
|-------------------------|---------------------|---------------------|---------------------|---------------------|
| Difference Metric:      | Human-Human         |                     | Human-AI            |                     |
|                         | H1(ref)<br>H2(test) | H2(ref)<br>H1(test) | H1(ref)<br>AI(test) | H2(ref)<br>AI(test) |
| False Negative Area (%) | 5.0                 | 4.0                 | 0.8                 | 0.5                 |
| False Positive Area (%) | 3.9                 | 5.1                 | 10.4                | 11.3                |
| Relative Error (%)      | 1.1                 | 1.1                 | 9.6                 | 10.8                |

| Blinded Attending Surgeon Review |              |                      |                      |                      |              |                         |
|----------------------------------|--------------|----------------------|----------------------|----------------------|--------------|-------------------------|
| Reviewer                         | PGT Estimate | H1 meets definition? | H2 meets definition? | AI meets definition? | Which is AI? | Which is most accurate? |
| 1                                | 90           | Yes                  | No                   | No                   | AI           | H2                      |
| 2                                |              | Yes                  | Yes                  | Yes                  | H2           | H1                      |
| 3                                | 70           | Yes                  | Yes                  | Yes                  | H1           | H2                      |

| Wound EMR Information |        |     |            |                |                   |                  |                  |                               |
|-----------------------|--------|-----|------------|----------------|-------------------|------------------|------------------|-------------------------------|
| Sequential Number     | Gender | Age | Wound Type | Wound Location | Wound Length (cm) | Wound Width (cm) | Wound Depth (cm) | Wound Area (cm <sup>2</sup> ) |
| 53                    | F      | 79  | VLU        | LLE            | 6.0               | 5.5              | 0.2              | 33.00                         |

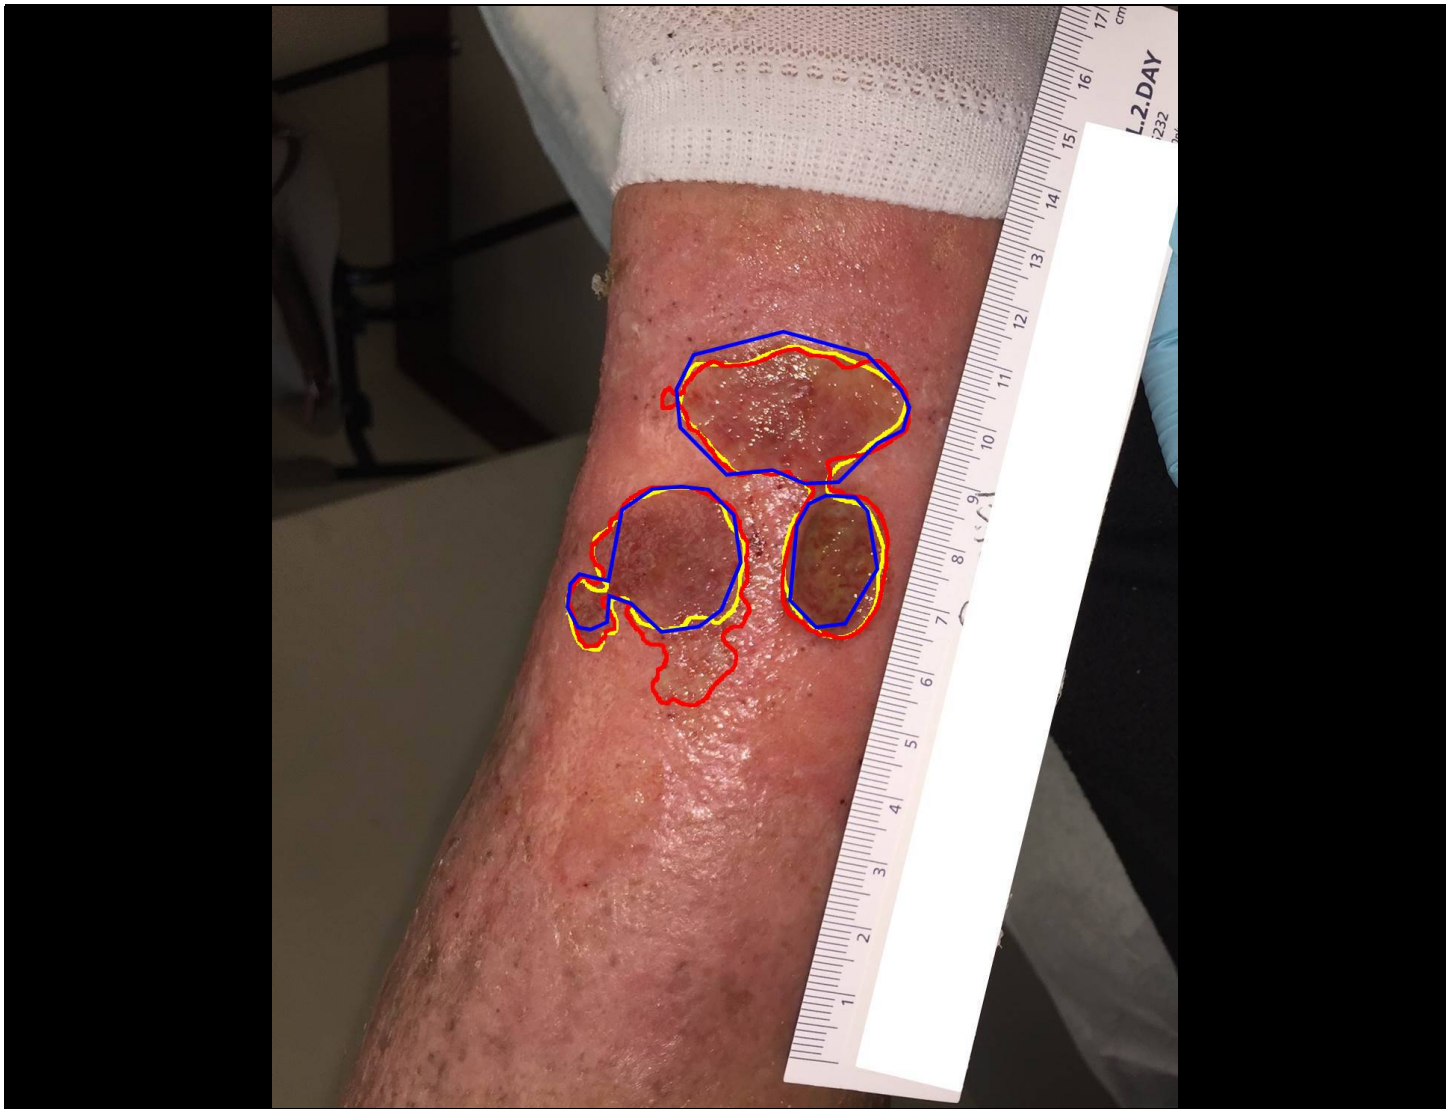

| Tracing Data |                               |                           |                               |
|--------------|-------------------------------|---------------------------|-------------------------------|
| Tracer:      | Wound Area (px <sup>2</sup> ) | Ruler Calibration (px/cm) | Wound Area (cm <sup>2</sup> ) |
| H1           | 91865                         | 85.9                      | 12.46                         |
| H2           | 106260                        | 83.9                      | 15.09                         |
| AI           | 91450                         | 81.7                      | 13.70                         |

| Tracing Comparisons     |                     |                     |                     |                     |
|-------------------------|---------------------|---------------------|---------------------|---------------------|
| Difference Metric:      | Human-Human         |                     | Human-AI            |                     |
|                         | H1(ref)<br>H2(test) | H2(ref)<br>H1(test) | H1(ref)<br>AI(test) | H2(ref)<br>AI(test) |
| False Negative Area (%) | 3.1                 | 16.3                | 10.5                | 21.7                |
| False Positive Area (%) | 18.8                | 2.7                 | 10.1                | 7.8                 |
| Relative Error (%)      | 15.7                | 13.5                | 0.5                 | 13.9                |

| Blinded Attending Surgeon Review |              |                      |                      |                      |              |                         |
|----------------------------------|--------------|----------------------|----------------------|----------------------|--------------|-------------------------|
| Reviewer                         | PGT Estimate | H1 meets definition? | H2 meets definition? | AI meets definition? | Which is AI? | Which is most accurate? |
| 1                                | 0            | No                   | Yes                  | No                   | AI           | H2                      |
| 2                                | 0            | Yes                  | No                   | No                   | H1           | H2                      |
| 3                                | 30           | Yes                  | Yes                  | Yes                  | H1           | H2                      |

| Wound EMR Information |        |     |            |                |                   |                  |                  |                               |
|-----------------------|--------|-----|------------|----------------|-------------------|------------------|------------------|-------------------------------|
| Sequential Number     | Gender | Age | Wound Type | Wound Location | Wound Length (cm) | Wound Width (cm) | Wound Depth (cm) | Wound Area (cm <sup>2</sup> ) |
| 54                    | F      | 89  | VLU        | RLE lat        | 5.0               | 5.6              | 0.1              | 28.00                         |

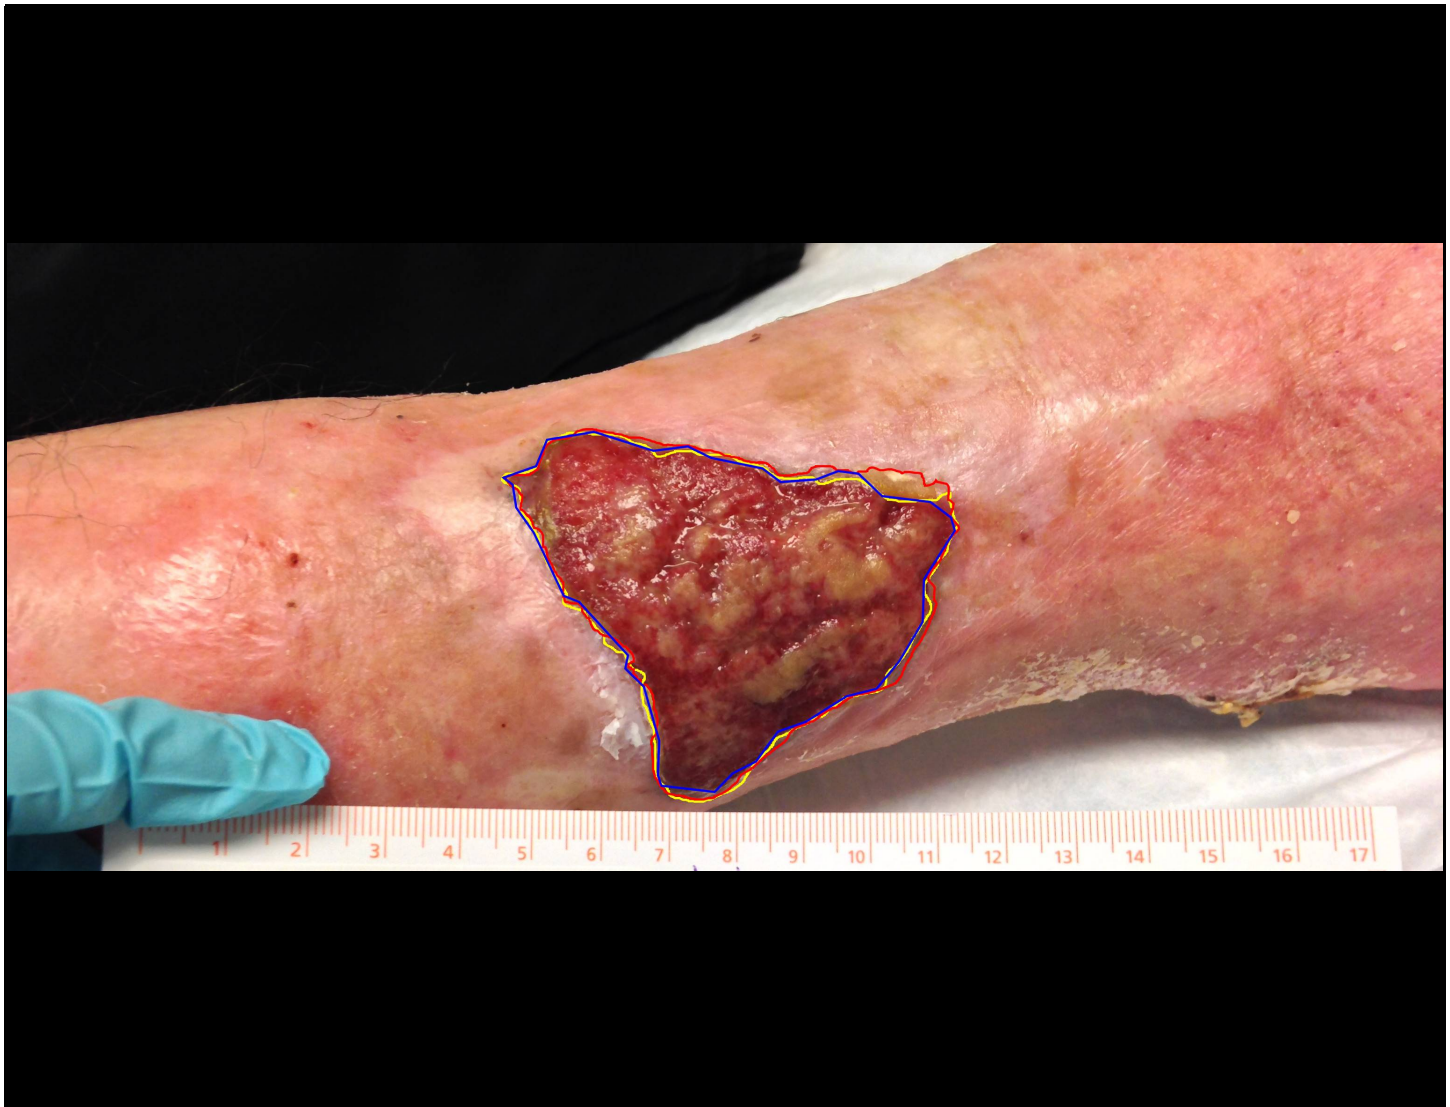

| Tracing Data |                               |                           |                               |
|--------------|-------------------------------|---------------------------|-------------------------------|
| Tracer:      | Wound Area (px <sup>2</sup> ) | Ruler Calibration (px/cm) | Wound Area (cm <sup>2</sup> ) |
| H1           | 494265                        | 156.0                     | 20.31                         |
| H2           | 511730                        | 153.3                     | 21.76                         |
| AI           | 482588                        | 170.0                     | 16.70                         |

| Tracing Comparisons     |                     |                     |                     |                     |
|-------------------------|---------------------|---------------------|---------------------|---------------------|
| Difference Metric:      | Human-Human         |                     | Human-AI            |                     |
|                         | H1(ref)<br>H2(test) | H2(ref)<br>H1(test) | H1(ref)<br>AI(test) | H2(ref)<br>AI(test) |
| False Negative Area (%) | 1.6                 | 5.0                 | 3.5                 | 6.7                 |
| False Positive Area (%) | 5.2                 | 1.6                 | 1.1                 | 1.1                 |
| Relative Error (%)      | 3.5                 | 3.4                 | 2.4                 | 5.7                 |

| Blinded Attending Surgeon Review |              |                      |                      |                      |              |                         |
|----------------------------------|--------------|----------------------|----------------------|----------------------|--------------|-------------------------|
| Reviewer                         | PGT Estimate | H1 meets definition? | H2 meets definition? | AI meets definition? | Which is AI? | Which is most accurate? |
| 1                                | 40           | Yes                  | Yes                  | Yes                  | AI           | AI                      |
| 2                                | 70           | Yes                  | No                   | Yes                  | H2           | AI                      |
| 3                                | 80           | Yes                  | No                   | Yes                  | H2           | H2                      |



| Wound EMR Information |        |     |            |                |                   |                  |                  |                               |
|-----------------------|--------|-----|------------|----------------|-------------------|------------------|------------------|-------------------------------|
| Sequential Number     | Gender | Age | Wound Type | Wound Location | Wound Length (cm) | Wound Width (cm) | Wound Depth (cm) | Wound Area (cm <sup>2</sup> ) |
| 55                    | M      | 65  | DFU        | L plantar      | 3.1               | 3.9              | 0.3              | 12.09                         |

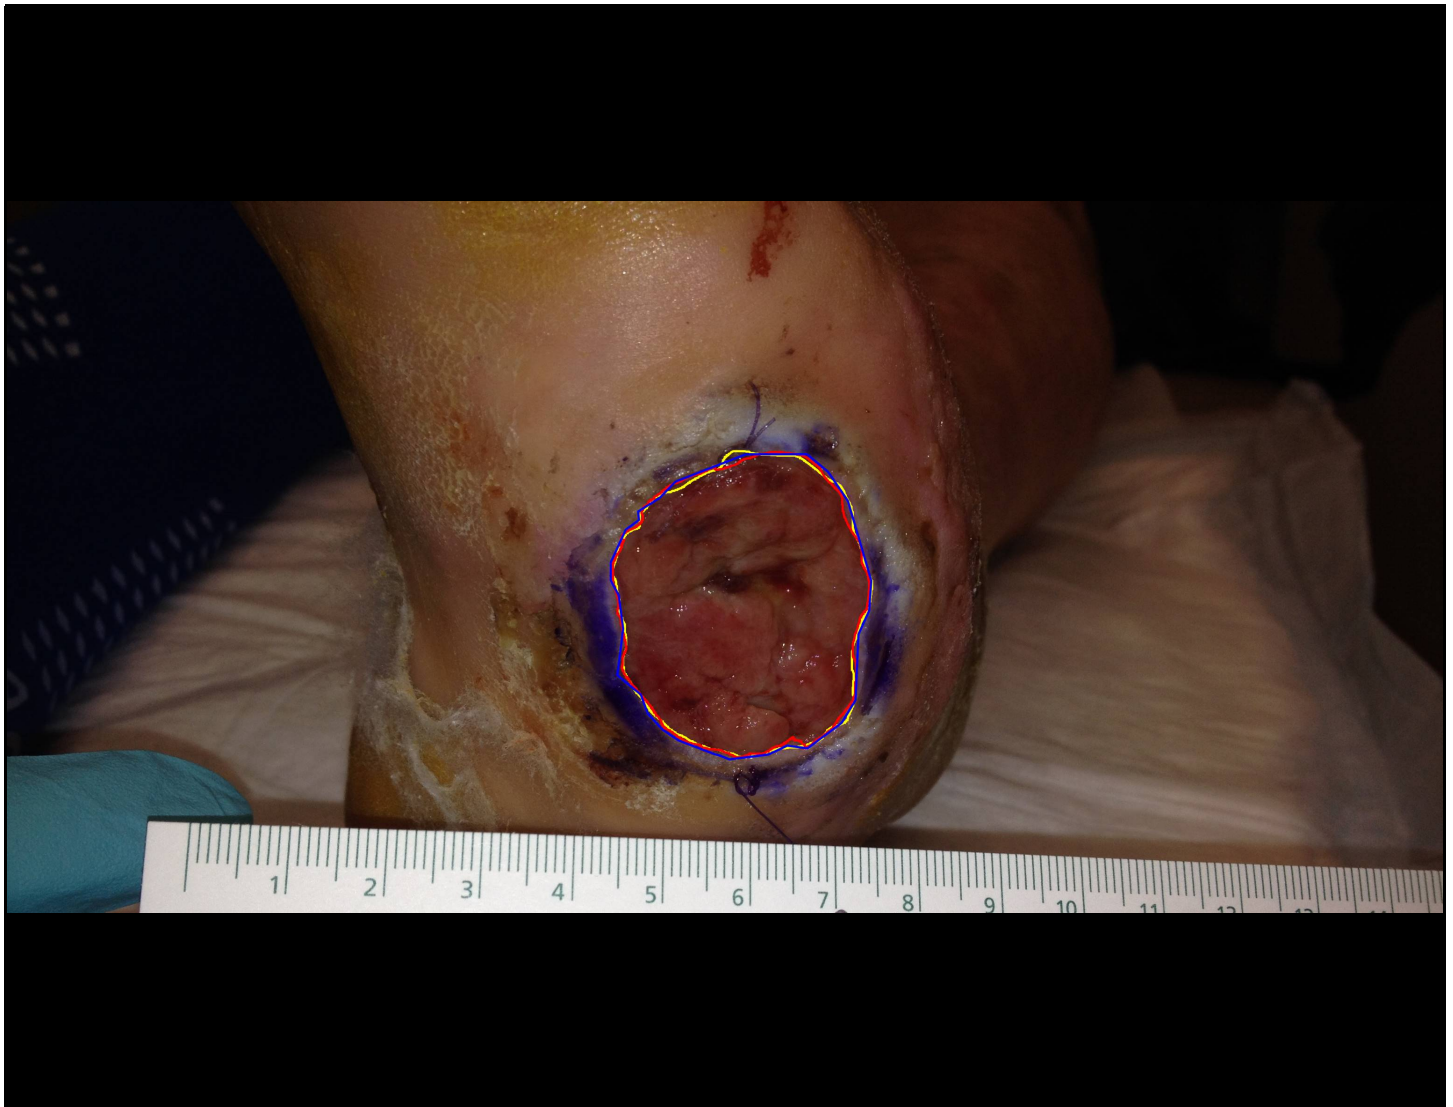

| Tracing Data |                               |                           |                               |
|--------------|-------------------------------|---------------------------|-------------------------------|
| Tracer:      | Wound Area (px <sup>2</sup> ) | Ruler Calibration (px/cm) | Wound Area (cm <sup>2</sup> ) |
| H1           | 314343                        | 198.8                     | 7.95                          |
| H2           | 312188                        | 197.4                     | 8.01                          |
| AI           | 323566                        | 206.3                     | 7.60                          |

| Tracing Comparisons     |                     |                     |                     |                     |
|-------------------------|---------------------|---------------------|---------------------|---------------------|
| Difference Metric:      | Human-Human         |                     | Human-AI            |                     |
|                         | H1(ref)<br>H2(test) | H2(ref)<br>H1(test) | H1(ref)<br>AI(test) | H2(ref)<br>AI(test) |
| False Negative Area (%) | 2.2                 | 1.5                 | 0.5                 | 0.4                 |
| False Positive Area (%) | 1.5                 | 2.2                 | 3.5                 | 4.0                 |
| Relative Error (%)      | 0.7                 | 0.7                 | 2.9                 | 3.6                 |

| Blinded Attending Surgeon Review |              |                      |                      |                      |              |                         |
|----------------------------------|--------------|----------------------|----------------------|----------------------|--------------|-------------------------|
| Reviewer                         | PGT Estimate | H1 meets definition? | H2 meets definition? | AI meets definition? | Which is AI? | Which is most accurate? |
| 1                                | 40           | No                   | No                   | Yes                  | H2           | H1                      |
| 2                                | 0            | Yes                  | Yes                  | Yes                  | H1           | AI                      |
| 3                                | 100          | Yes                  | Yes                  | Yes                  | H1           | AI                      |

| Wound EMR Information |        |     |            |                |                   |                  |                  |                               |
|-----------------------|--------|-----|------------|----------------|-------------------|------------------|------------------|-------------------------------|
| Sequential Number     | Gender | Age | Wound Type | Wound Location | Wound Length (cm) | Wound Width (cm) | Wound Depth (cm) | Wound Area (cm <sup>2</sup> ) |
| 56                    | F      | 82  | PU         | L buttock      | 2.9               | 2.4              | 0.5              | 6.96                          |

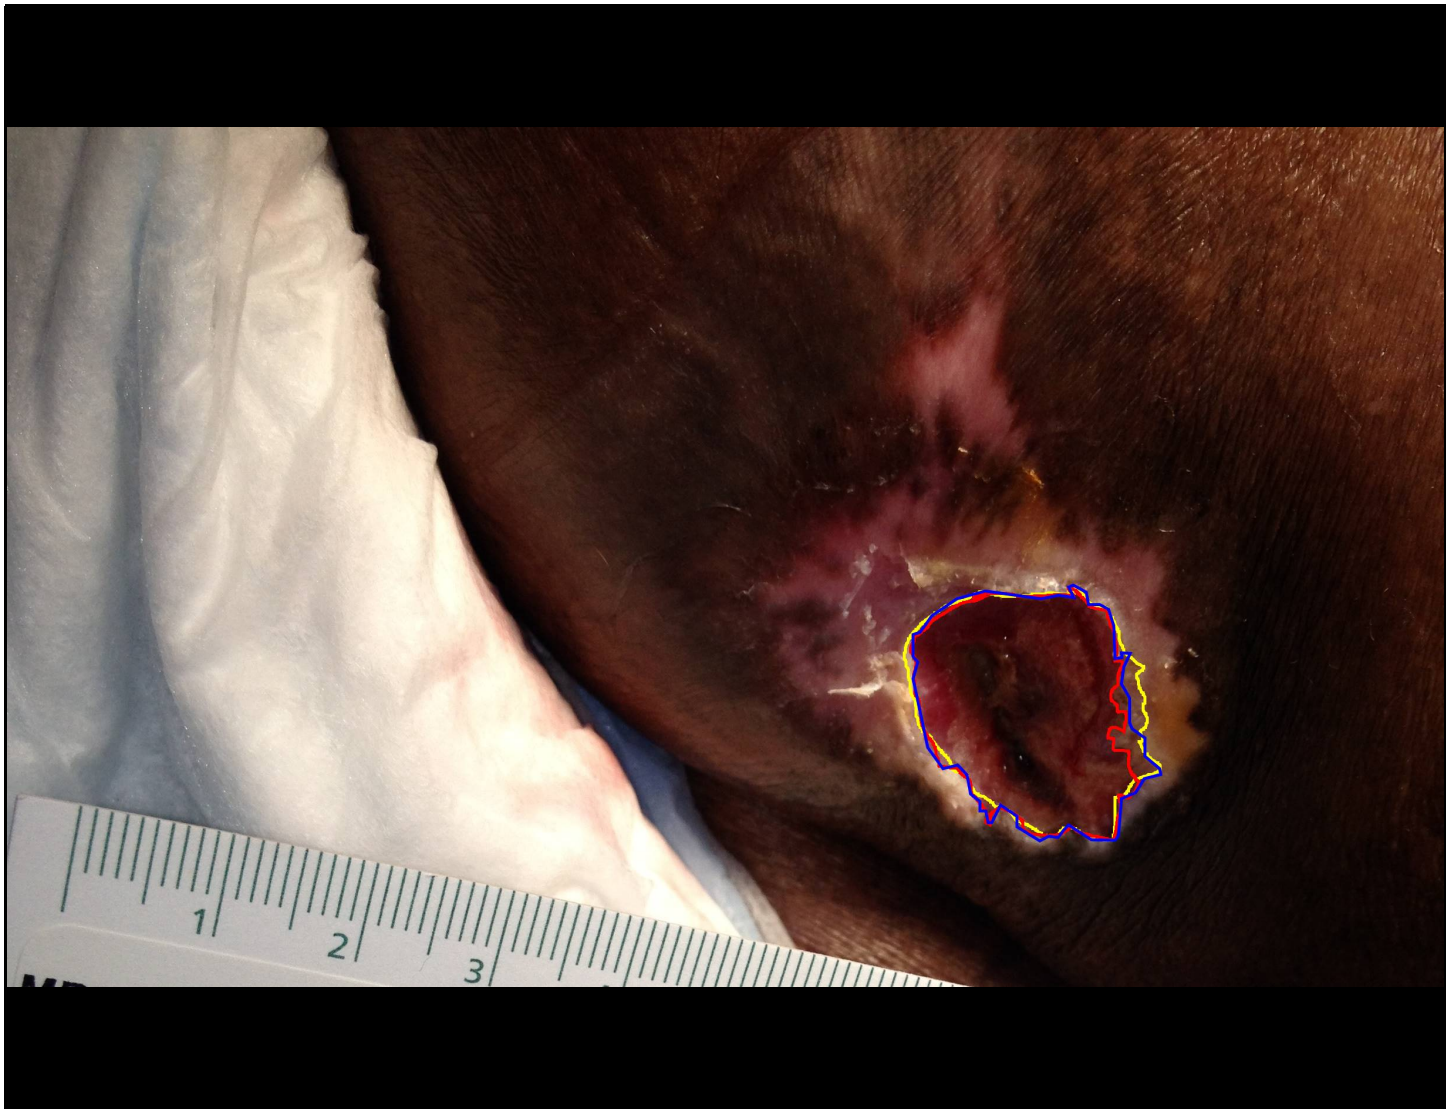

| Tracing Data |                               |                           |                               |
|--------------|-------------------------------|---------------------------|-------------------------------|
| Tracer:      | Wound Area (px <sup>2</sup> ) | Ruler Calibration (px/cm) | Wound Area (cm <sup>2</sup> ) |
| H1           | 130449                        | 224.9                     | 2.58                          |
| H2           | 120504                        | 225.9                     | 2.36                          |
| AI           | 128792                        | 267.5                     | 1.80                          |

| Tracing Comparisons     |                     |                     |                     |                     |
|-------------------------|---------------------|---------------------|---------------------|---------------------|
| Difference Metric:      | Human-Human         |                     | Human-AI            |                     |
|                         | H1(ref)<br>H2(test) | H2(ref)<br>H1(test) | H1(ref)<br>AI(test) | H2(ref)<br>AI(test) |
| False Negative Area (%) | 9.6                 | 2.1                 | 4.9                 | 0.6                 |
| False Positive Area (%) | 2.0                 | 10.4                | 3.6                 | 7.5                 |
| Relative Error (%)      | 7.6                 | 8.3                 | 1.3                 | 6.9                 |

| Blinded Attending Surgeon Review |              |                      |                      |                      |              |                         |
|----------------------------------|--------------|----------------------|----------------------|----------------------|--------------|-------------------------|
| Reviewer                         | PGT Estimate | H1 meets definition? | H2 meets definition? | AI meets definition? | Which is AI? | Which is most accurate? |
| 1                                |              | Yes                  | No                   | No                   | H1           | AI                      |
| 2                                | <10          | No                   | Yes                  | Yes                  | AI           | AI                      |
| 3                                | 80           | Yes                  | Yes                  | Yes                  | H2           | AI                      |

| Wound EMR Information |        |     |            |                |                   |                  |                  |                               |
|-----------------------|--------|-----|------------|----------------|-------------------|------------------|------------------|-------------------------------|
| Sequential Number     | Gender | Age | Wound Type | Wound Location | Wound Length (cm) | Wound Width (cm) | Wound Depth (cm) | Wound Area (cm <sup>2</sup> ) |
| 57                    | F      | 80  | DFU        | R hallux       | 0.5               | 0.4              |                  | 0.20                          |

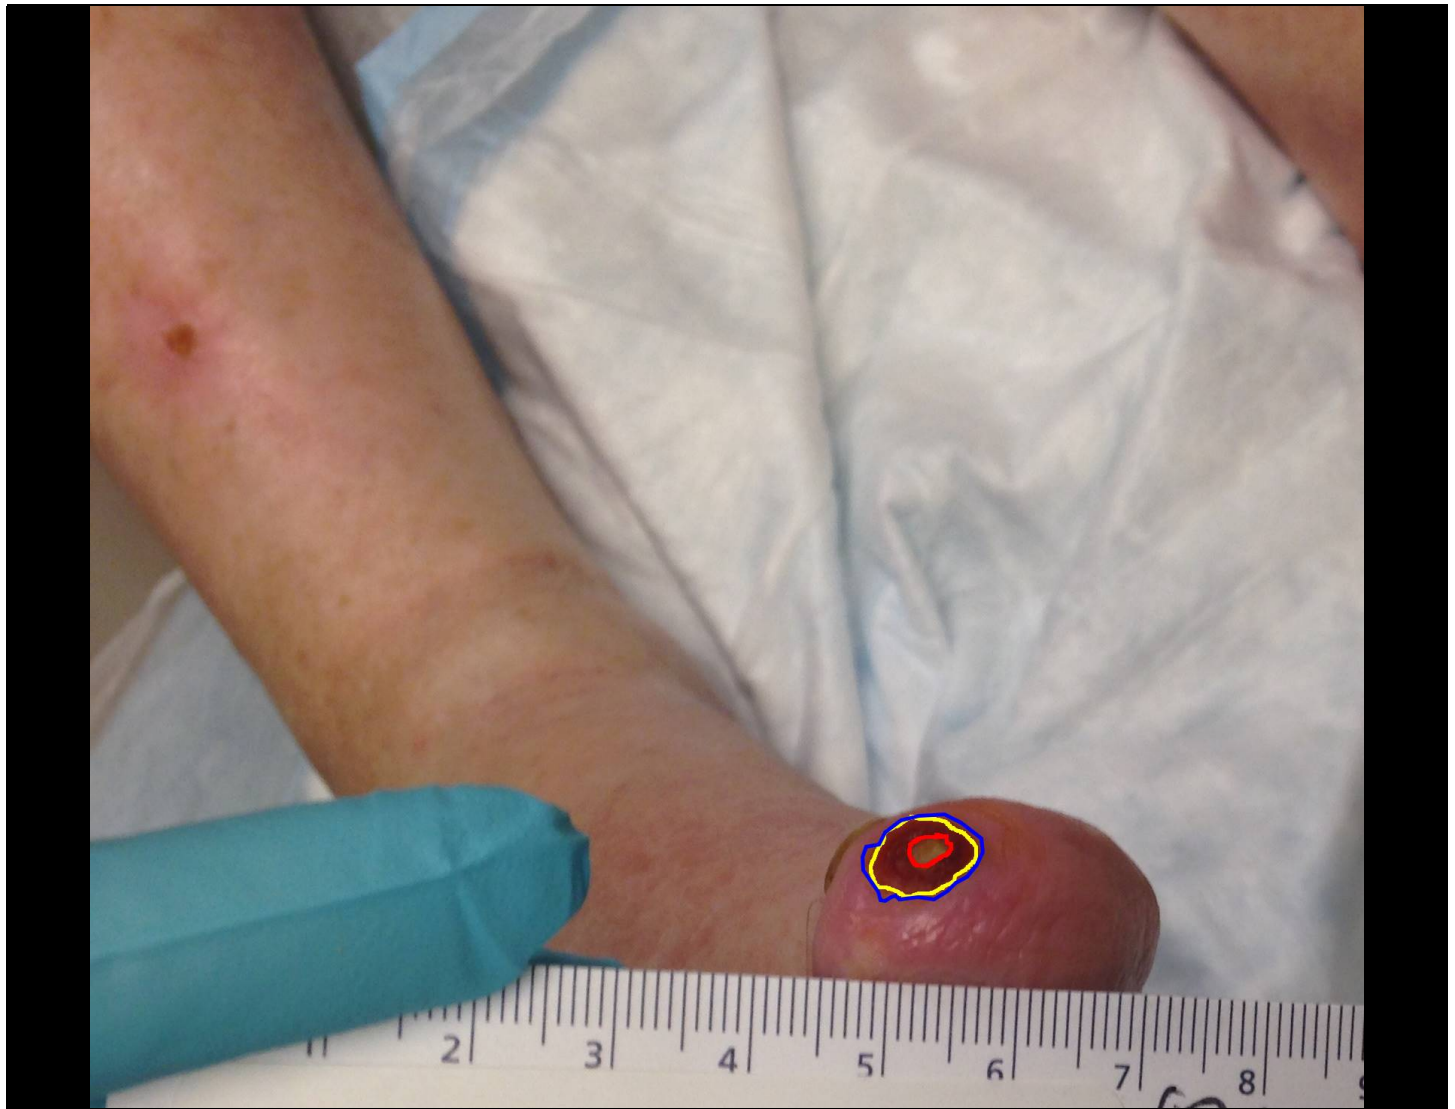

| Tracing Data |                               |                           |                               |
|--------------|-------------------------------|---------------------------|-------------------------------|
| Tracer:      | Wound Area (px <sup>2</sup> ) | Ruler Calibration (px/cm) | Wound Area (cm <sup>2</sup> ) |
| H1           | 10556                         | 176.2                     | 0.34                          |
| H2           | 1620                          | 174.8                     | 0.05                          |
| AI           | 13319                         | 163.2                     | 0.50                          |

| Tracing Comparisons     |                     |                     |                     |                     |
|-------------------------|---------------------|---------------------|---------------------|---------------------|
| Difference Metric:      | Human-Human         |                     | Human-AI            |                     |
|                         | H1(ref)<br>H2(test) | H2(ref)<br>H1(test) | H1(ref)<br>AI(test) | H2(ref)<br>AI(test) |
| False Negative Area (%) | 84.6                | 0.0                 | 0.1                 | 0.0                 |
| False Positive Area (%) | 0.0                 | 551.5               | 26.3                | 722.1               |
| Relative Error (%)      | 84.7                | 551.6               | 26.2                | 722.2               |

| Blinded Attending Surgeon Review |              |                      |                      |                      |              |                         |
|----------------------------------|--------------|----------------------|----------------------|----------------------|--------------|-------------------------|
| Reviewer                         | PGT Estimate | H1 meets definition? | H2 meets definition? | AI meets definition? | Which is AI? | Which is most accurate? |
| 1                                | 0            | No                   | Yes                  | No                   | H2           | H2                      |
| 2                                | 10           | No                   | No                   | Yes                  | H2           | H1                      |
| 3                                | 0            | Yes                  | No                   | Yes                  | AI           | H1                      |

| Wound EMR Information |        |     |            |                |                   |                  |                  |                               |
|-----------------------|--------|-----|------------|----------------|-------------------|------------------|------------------|-------------------------------|
| Sequential Number     | Gender | Age | Wound Type | Wound Location | Wound Length (cm) | Wound Width (cm) | Wound Depth (cm) | Wound Area (cm <sup>2</sup> ) |
| 58                    | M      | 64  | VLU        | LLE ant        | 4.5               | 5.5              | 0.1              | 24.75                         |

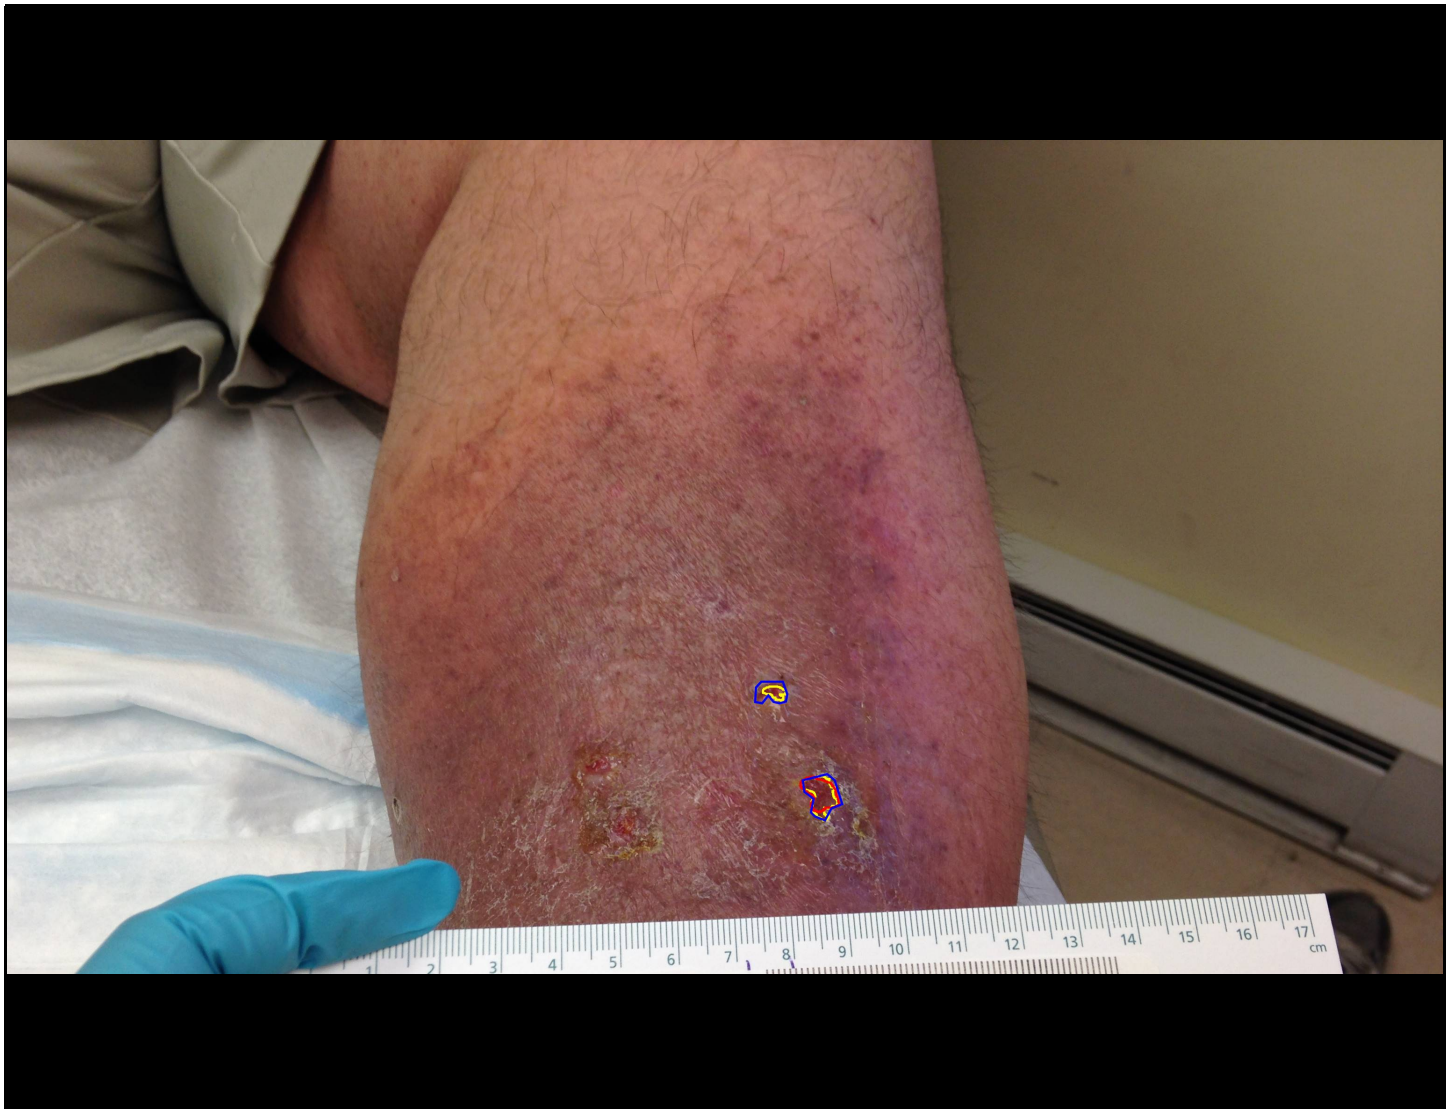

| Tracing Data |                               |                           |                               |
|--------------|-------------------------------|---------------------------|-------------------------------|
| Tracer:      | Wound Area (px <sup>2</sup> ) | Ruler Calibration (px/cm) | Wound Area (cm <sup>2</sup> ) |
| H1           | 5450                          | 128.5                     | 0.33                          |
| H2           | 4261                          | 105.8                     | 0.38                          |
| AI           | 8694                          | 111.4                     | 0.70                          |

| Tracing Comparisons     |                     |                     |                     |                     |
|-------------------------|---------------------|---------------------|---------------------|---------------------|
| Difference Metric:      | Human-Human         |                     | Human-AI            |                     |
|                         | H1(ref)<br>H2(test) | H2(ref)<br>H1(test) | H1(ref)<br>AI(test) | H2(ref)<br>AI(test) |
| False Negative Area (%) | 31.6                | 12.5                | 3.1                 | 5.1                 |
| False Positive Area (%) | 9.8                 | 40.4                | 62.6                | 109.1               |
| Relative Error (%)      | 21.8                | 27.9                | 59.5                | 104.0               |

| Blinded Attending Surgeon Review |              |                      |                      |                      |              |                         |
|----------------------------------|--------------|----------------------|----------------------|----------------------|--------------|-------------------------|
| Reviewer                         | PGT Estimate | H1 meets definition? | H2 meets definition? | AI meets definition? | Which is AI? | Which is most accurate? |
| 1                                | 100          | Yes                  | No                   | No                   | H1           | H1                      |
| 2                                | 90           | No                   | No                   | No                   | H2           | AI                      |
| 3                                | 20           | Yes                  | Yes                  | No                   | AI           | H1                      |

| Wound EMR Information |        |     |            |                |                   |                  |                  |                               |
|-----------------------|--------|-----|------------|----------------|-------------------|------------------|------------------|-------------------------------|
| Sequential Number     | Gender | Age | Wound Type | Wound Location | Wound Length (cm) | Wound Width (cm) | Wound Depth (cm) | Wound Area (cm <sup>2</sup> ) |
| 59                    | F      | 60  | VLU        | LLE medial     | 10.0              | 4.0              | 0.2              | 40.00                         |

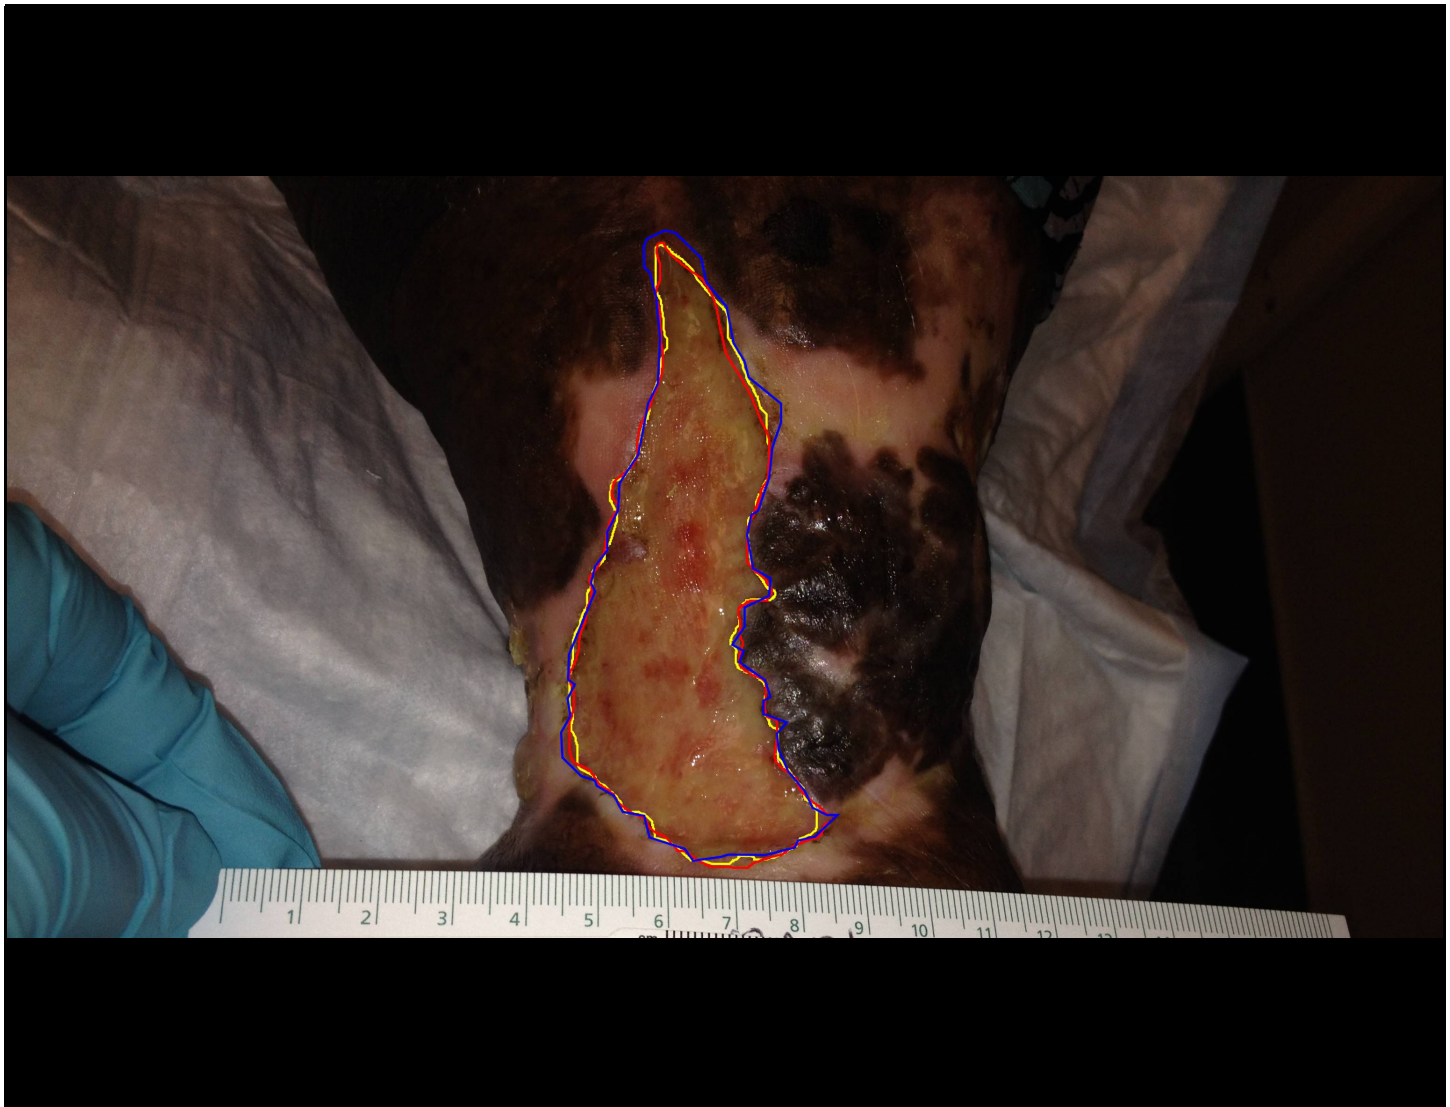

| Tracing Data |                               |                           |                               |
|--------------|-------------------------------|---------------------------|-------------------------------|
| Tracer:      | Wound Area (px <sup>2</sup> ) | Ruler Calibration (px/cm) | Wound Area (cm <sup>2</sup> ) |
| H1           | 431293                        | 158.1                     | 17.25                         |
| H2           | 431895                        | 152.1                     | 18.68                         |
| AI           | 454928                        | 175.9                     | 14.70                         |

| Tracing Comparisons     |                     |                     |                     |                     |
|-------------------------|---------------------|---------------------|---------------------|---------------------|
| Difference Metric:      | Human-Human         |                     | Human-AI            |                     |
|                         | H1(ref)<br>H2(test) | H2(ref)<br>H1(test) | H1(ref)<br>AI(test) | H2(ref)<br>AI(test) |
| False Negative Area (%) | 2.7                 | 2.8                 | 1.3                 | 1.8                 |
| False Positive Area (%) | 2.8                 | 2.7                 | 6.8                 | 7.1                 |
| Relative Error (%)      | 0.1                 | 0.1                 | 5.5                 | 5.3                 |

| Blinded Attending Surgeon Review |              |                      |                      |                      |              |                         |
|----------------------------------|--------------|----------------------|----------------------|----------------------|--------------|-------------------------|
| Reviewer                         | PGT Estimate | H1 meets definition? | H2 meets definition? | AI meets definition? | Which is AI? | Which is most accurate? |
| 1                                | 10           | Yes                  | Yes                  | No                   | AI           | H2                      |
| 2                                | 0            | Yes                  | Yes                  | No                   | H2           | H2                      |
| 3                                | 10           | Yes                  | Yes                  | Yes                  | H1           | AI                      |

| Wound EMR Information |        |     |            |                |                   |                  |                  |                               |
|-----------------------|--------|-----|------------|----------------|-------------------|------------------|------------------|-------------------------------|
| Sequential Number     | Gender | Age | Wound Type | Wound Location | Wound Length (cm) | Wound Width (cm) | Wound Depth (cm) | Wound Area (cm <sup>2</sup> ) |
| 60                    | M      | 64  | DFU        | L plantar      | 6.0               | 3.5              | 0.3              | 21.00                         |

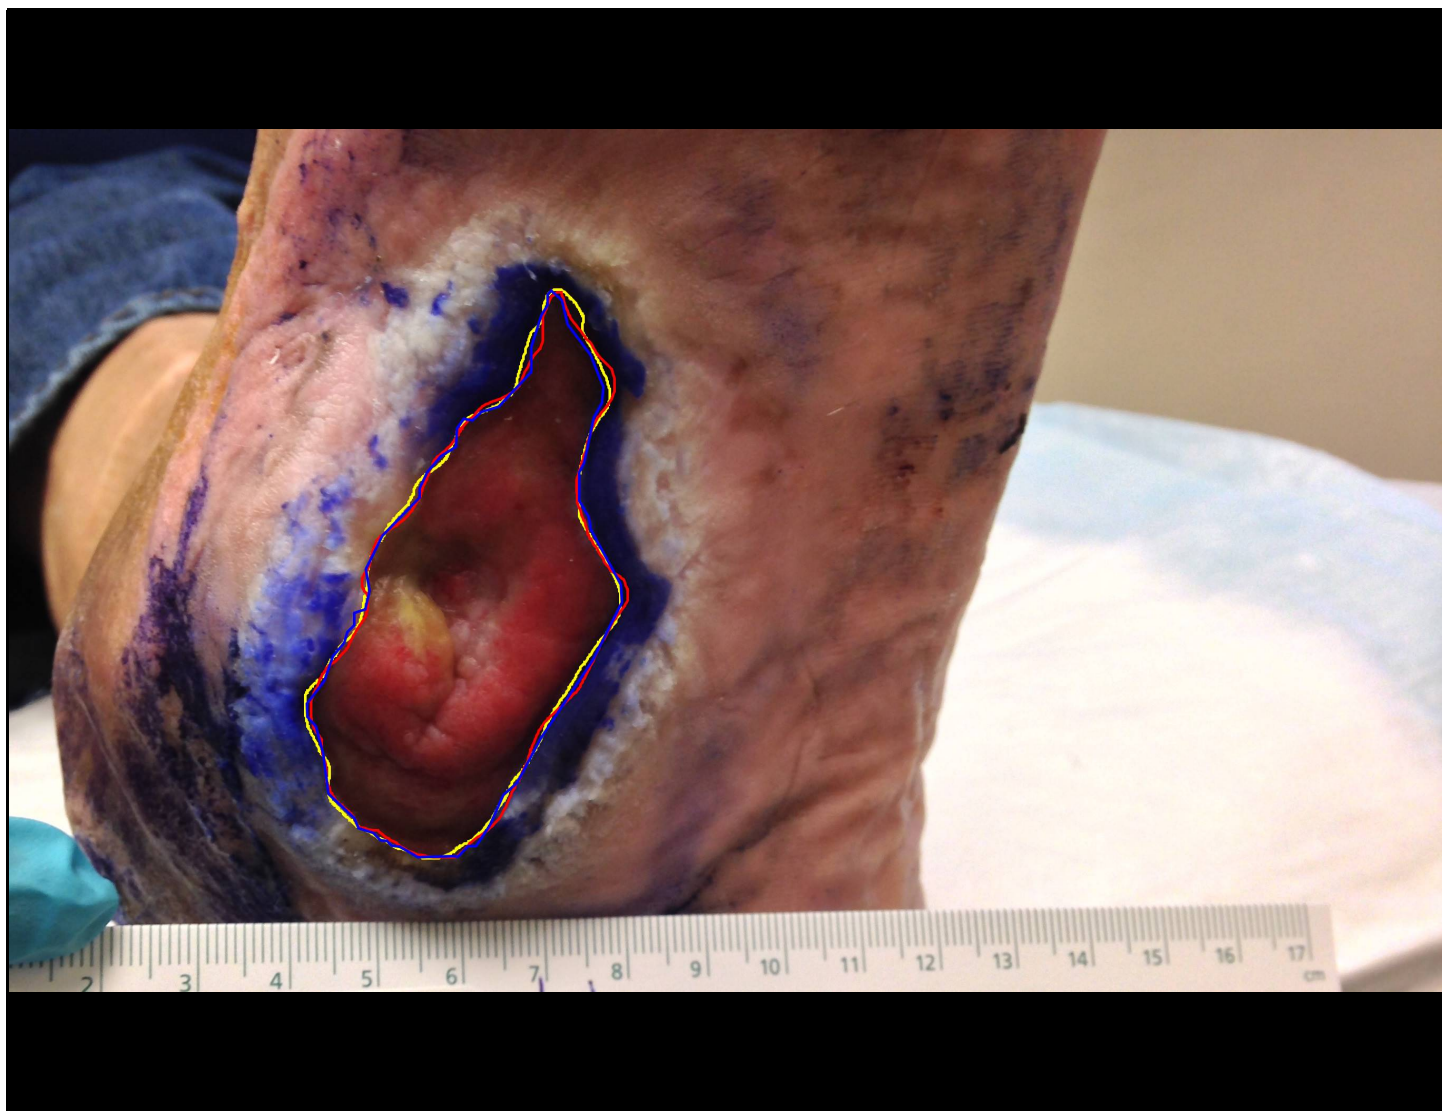

| Tracing Data |                               |                           |                               |
|--------------|-------------------------------|---------------------------|-------------------------------|
| Tracer:      | Wound Area (px <sup>2</sup> ) | Ruler Calibration (px/cm) | Wound Area (cm <sup>2</sup> ) |
| H1           | 346190                        | 161.3                     | 13.30                         |
| H2           | 343120                        | 160.0                     | 13.40                         |
| AI           | 342294                        | 155.3                     | 14.20                         |

| Tracing Comparisons     |                     |                     |                     |                     |
|-------------------------|---------------------|---------------------|---------------------|---------------------|
| Difference Metric:      | Human-Human         |                     | Human-AI            |                     |
|                         | H1(ref)<br>H2(test) | H2(ref)<br>H1(test) | H1(ref)<br>AI(test) | H2(ref)<br>AI(test) |
| False Negative Area (%) | 3.1                 | 2.3                 | 2.9                 | 2.4                 |
| False Positive Area (%) | 2.2                 | 3.2                 | 1.8                 | 2.2                 |
| Relative Error (%)      | 0.9                 | 0.9                 | 1.1                 | 0.2                 |

| Blinded Attending Surgeon Review |              |                      |                      |                      |              |                         |
|----------------------------------|--------------|----------------------|----------------------|----------------------|--------------|-------------------------|
| Reviewer                         | PGT Estimate | H1 meets definition? | H2 meets definition? | AI meets definition? | Which is AI? | Which is most accurate? |
| 1                                | 80           | Yes                  | Yes                  | Yes                  | H1           | H1                      |
| 2                                | 60           | Yes                  | Yes                  | Yes                  | H2           | H1                      |
| 3                                | 60           | Yes                  | Yes                  | Yes                  | H1           | H1                      |

| Wound EMR Information |        |     |            |                |                   |                  |                  |                               |
|-----------------------|--------|-----|------------|----------------|-------------------|------------------|------------------|-------------------------------|
| Sequential Number     | Gender | Age | Wound Type | Wound Location | Wound Length (cm) | Wound Width (cm) | Wound Depth (cm) | Wound Area (cm <sup>2</sup> ) |
| 61                    | M      | 70  | PU         | R foot         | 1.5               | 1.8              |                  | 2.70                          |

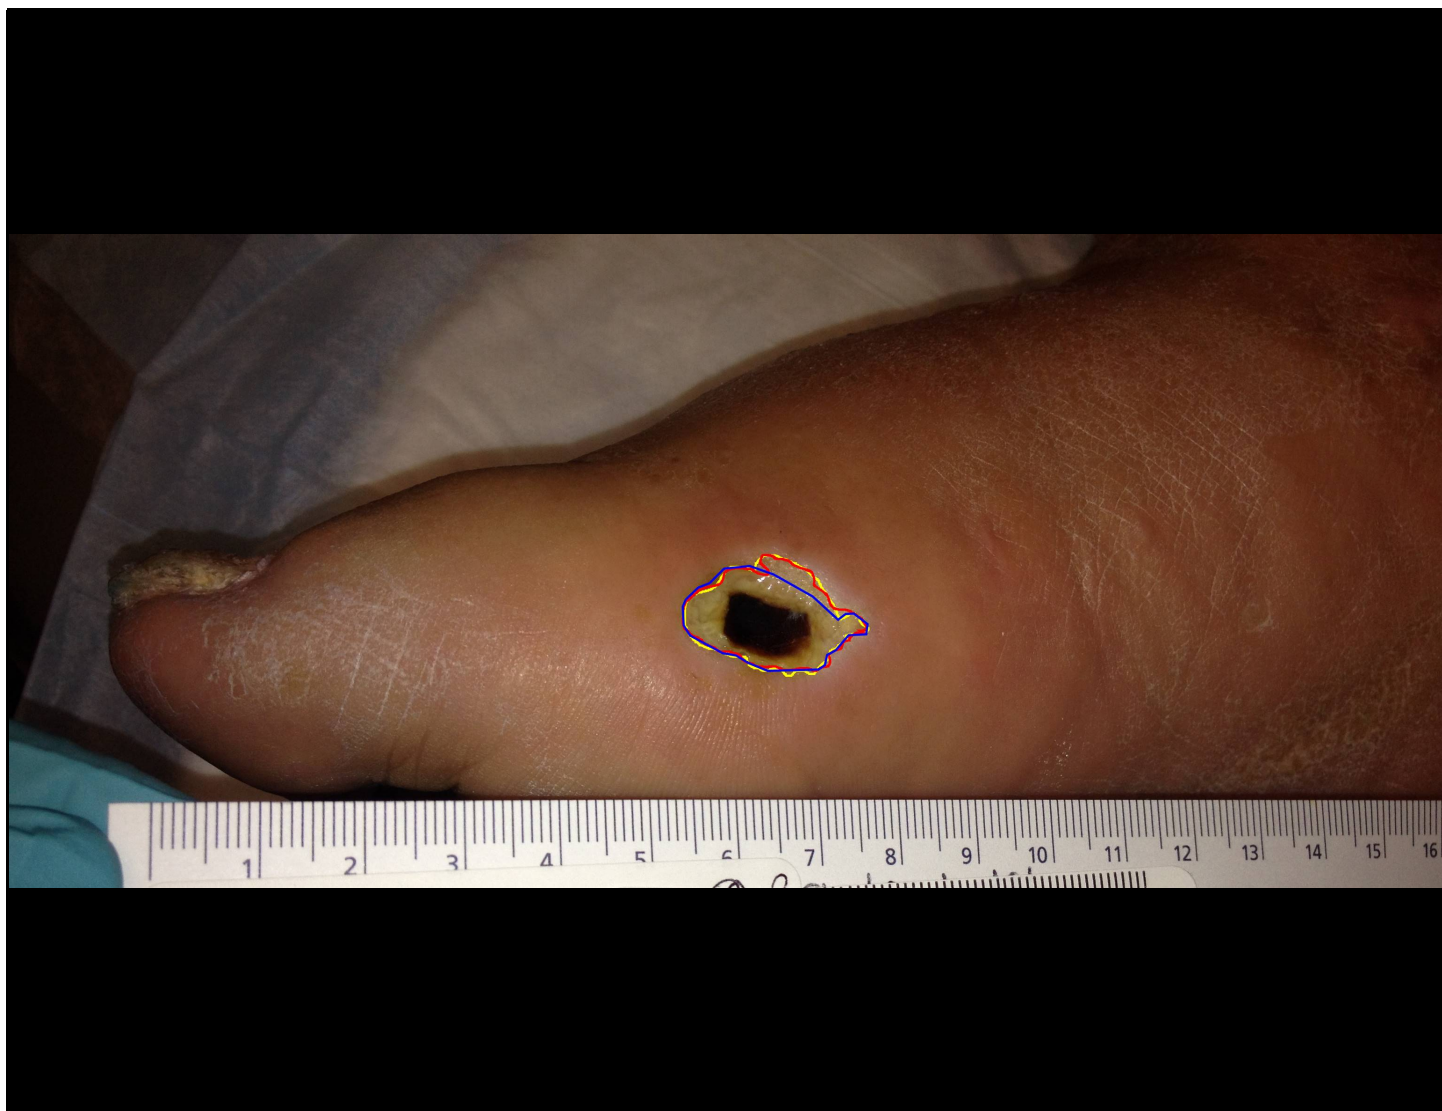

| Tracing Data |                               |                           |                               |
|--------------|-------------------------------|---------------------------|-------------------------------|
| Tracer:      | Wound Area (px <sup>2</sup> ) | Ruler Calibration (px/cm) | Wound Area (cm <sup>2</sup> ) |
| H1           | 69407                         | 197.5                     | 1.78                          |
| H2           | 67886                         | 188.0                     | 1.92                          |
| AI           | 62895                         | 212.0                     | 1.40                          |

| Tracing Comparisons     |                     |                     |                     |                     |
|-------------------------|---------------------|---------------------|---------------------|---------------------|
| Difference Metric:      | Human-Human         |                     | Human-AI            |                     |
|                         | H1(ref)<br>H2(test) | H2(ref)<br>H1(test) | H1(ref)<br>AI(test) | H2(ref)<br>AI(test) |
| False Negative Area (%) | 5.1                 | 3.0                 | 12.7                | 11.4                |
| False Positive Area (%) | 2.9                 | 5.2                 | 3.4                 | 4.1                 |
| Relative Error (%)      | 2.2                 | 2.2                 | 9.4                 | 7.4                 |

| Blinded Attending Surgeon Review |              |                      |                      |                      |              |                         |
|----------------------------------|--------------|----------------------|----------------------|----------------------|--------------|-------------------------|
| Reviewer                         | PGT Estimate | H1 meets definition? | H2 meets definition? | AI meets definition? | Which is AI? | Which is most accurate? |
| 1                                | 0            | Yes                  | Yes                  | No                   | AI           | AI                      |
| 2                                | 0            | Yes                  | Yes                  | No                   | AI           | H2                      |
| 3                                | 50           | Yes                  | Yes                  | Yes                  | H1           | AI                      |

| Wound EMR Information |        |     |            |                |                   |                  |                  |                               |
|-----------------------|--------|-----|------------|----------------|-------------------|------------------|------------------|-------------------------------|
| Sequential Number     | Gender | Age | Wound Type | Wound Location | Wound Length (cm) | Wound Width (cm) | Wound Depth (cm) | Wound Area (cm <sup>2</sup> ) |
| 62                    | F      | 60  | abscess    | R med thigh    | 2.0               | 1.0              | 0.1              | 2.00                          |

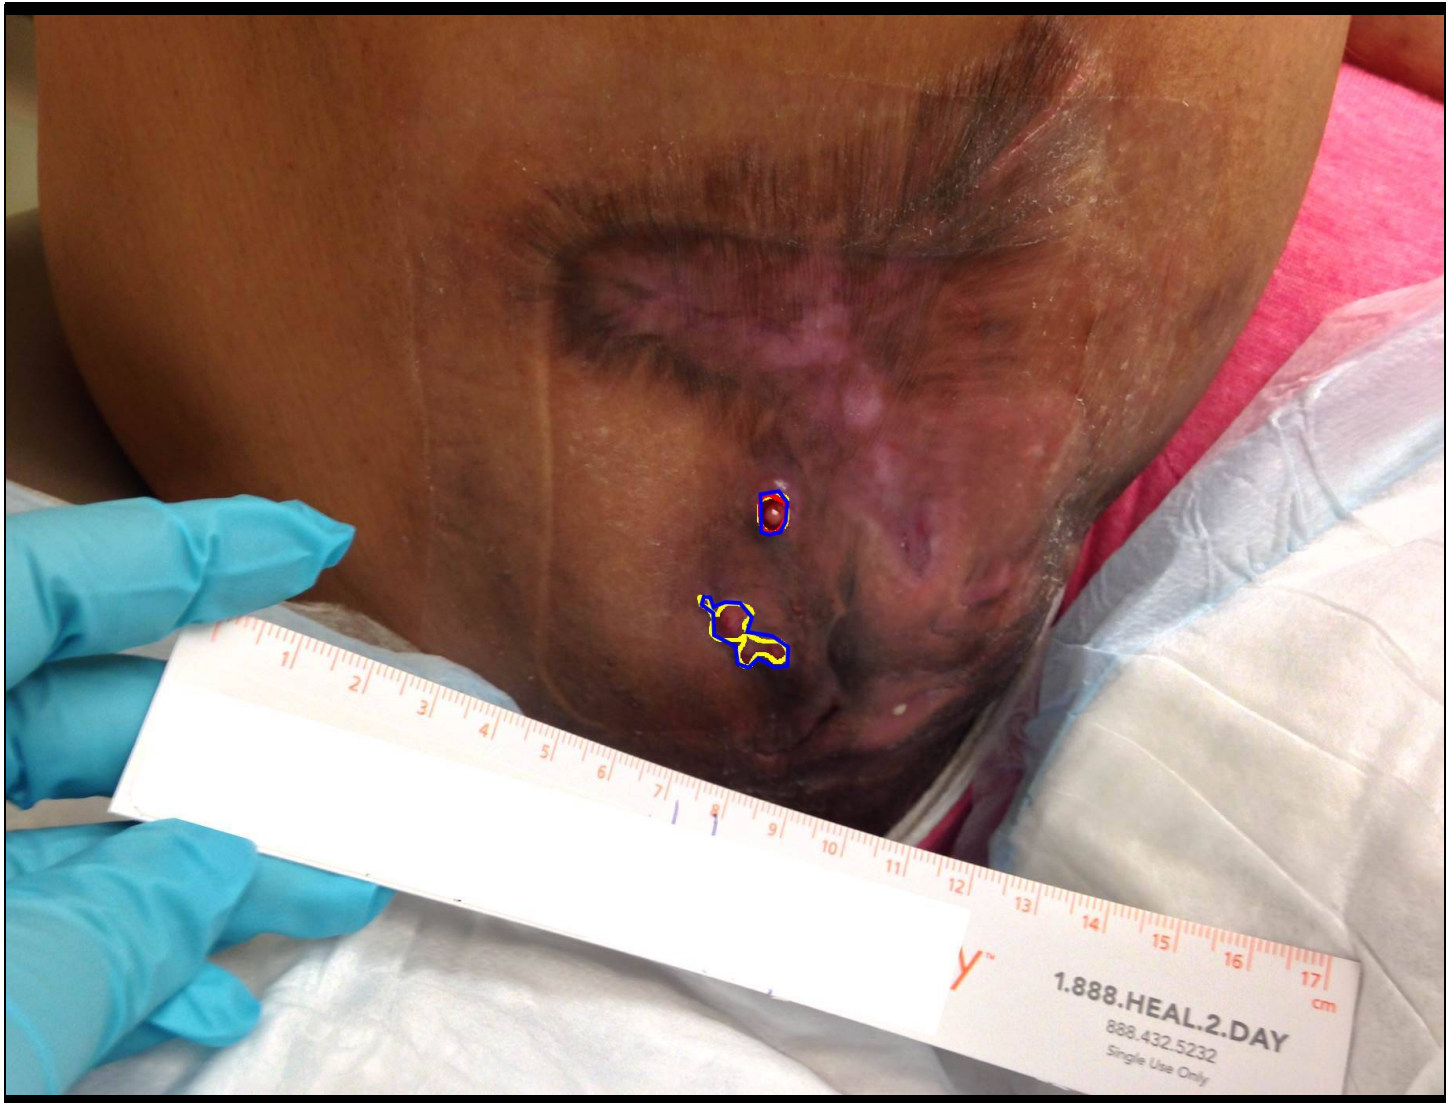

| Tracing Data |                               |                           |                               |
|--------------|-------------------------------|---------------------------|-------------------------------|
| Tracer:      | Wound Area (px <sup>2</sup> ) | Ruler Calibration (px/cm) | Wound Area (cm <sup>2</sup> ) |
| H1           | 4943                          | 76.3                      | 0.85                          |
| H2           | 1324                          | 42.9                      | 0.72                          |
| AI           | 6006                          | 92.6                      | 0.70                          |

| Tracing Comparisons     |                     |                     |                     |                     |
|-------------------------|---------------------|---------------------|---------------------|---------------------|
| Difference Metric:      | Human-Human         |                     | Human-AI            |                     |
|                         | H1(ref)<br>H2(test) | H2(ref)<br>H1(test) | H1(ref)<br>AI(test) | H2(ref)<br>AI(test) |
| False Negative Area (%) | 74.4                | 4.4                 | 6.2                 | 3.6                 |
| False Positive Area (%) | 1.2                 | 277.7               | 27.7                | 357.3               |
| Relative Error (%)      | 73.2                | 273.3               | 21.5                | 353.6               |

| Blinded Attending Surgeon Review |              |                      |                      |                      |              |                         |
|----------------------------------|--------------|----------------------|----------------------|----------------------|--------------|-------------------------|
| Reviewer                         | PGT Estimate | H1 meets definition? | H2 meets definition? | AI meets definition? | Which is AI? | Which is most accurate? |
| 1                                | 100          | No                   | No                   | Yes                  | H1           | AI                      |
| 2                                | 0            | Yes                  | Yes                  | Yes                  | AI           | H2                      |
| 3                                | 30           | Yes                  | Yes                  | No                   | AI           | H1                      |



| Wound EMR Information |        |     |            |                |                   |                  |                  |                               |
|-----------------------|--------|-----|------------|----------------|-------------------|------------------|------------------|-------------------------------|
| Sequential Number     | Gender | Age | Wound Type | Wound Location | Wound Length (cm) | Wound Width (cm) | Wound Depth (cm) | Wound Area (cm <sup>2</sup> ) |
| 63                    | F      | 37  | VLU        | RLE med        | 7.8               | 2.8              |                  | 21.84                         |

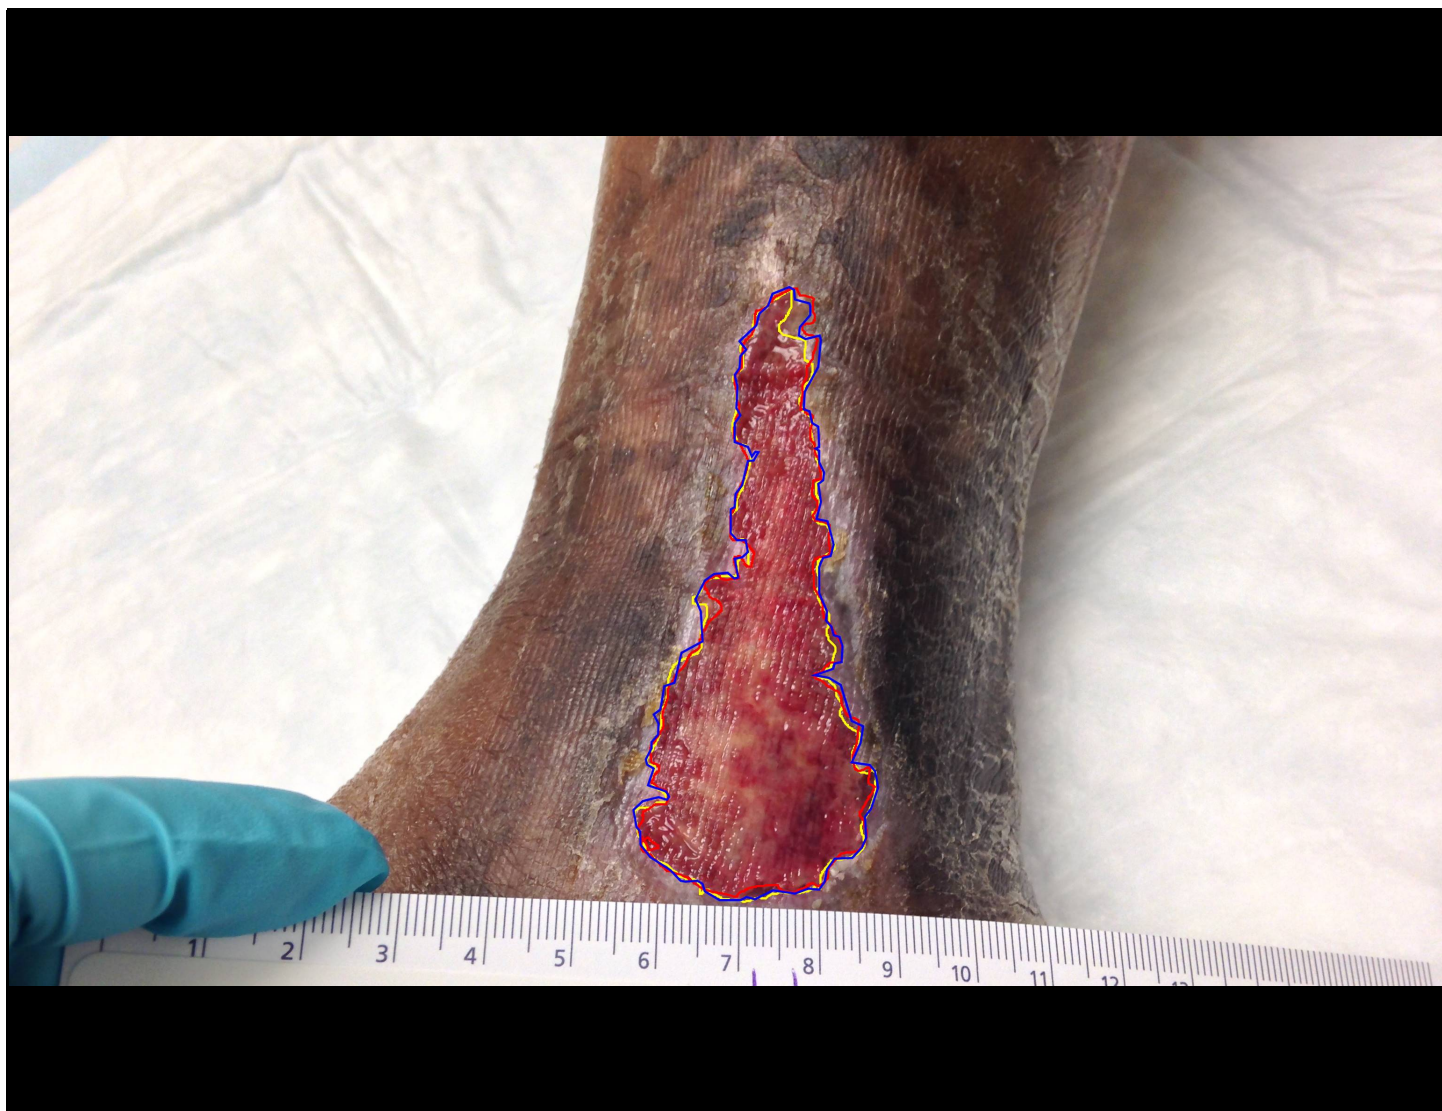

| Tracing Data |                               |                           |                               |
|--------------|-------------------------------|---------------------------|-------------------------------|
| Tracer:      | Wound Area (px <sup>2</sup> ) | Ruler Calibration (px/cm) | Wound Area (cm <sup>2</sup> ) |
| H1           | 382176                        | 194.8                     | 10.07                         |
| H2           | 380272                        | 188.2                     | 10.74                         |
| AI           | 401955                        | 200.5                     | 10.00                         |

| Tracing Comparisons     |                     |                     |                     |                     |
|-------------------------|---------------------|---------------------|---------------------|---------------------|
| Difference Metric:      | Human-Human         |                     | Human-AI            |                     |
|                         | H1(ref)<br>H2(test) | H2(ref)<br>H1(test) | H1(ref)<br>AI(test) | H2(ref)<br>AI(test) |
| False Negative Area (%) | 4.3                 | 3.8                 | 1.0                 | 1.1                 |
| False Positive Area (%) | 3.8                 | 4.3                 | 6.2                 | 6.8                 |
| Relative Error (%)      | 0.5                 | 0.5                 | 5.2                 | 5.7                 |

| Blinded Attending Surgeon Review |              |                      |                      |                      |              |                         |
|----------------------------------|--------------|----------------------|----------------------|----------------------|--------------|-------------------------|
| Reviewer                         | PGT Estimate | H1 meets definition? | H2 meets definition? | AI meets definition? | Which is AI? | Which is most accurate? |
| 1                                | 90           | Yes                  | Yes                  | Yes                  | H1           | H1                      |
| 2                                | 60           | Yes                  | Yes                  | Yes                  | AI           | H1                      |
| 3                                | 100          | Yes                  | Yes                  | Yes                  | H1           | AI                      |

| Wound EMR Information |        |     |            |                |                   |                  |                  |                               |
|-----------------------|--------|-----|------------|----------------|-------------------|------------------|------------------|-------------------------------|
| Sequential Number     | Gender | Age | Wound Type | Wound Location | Wound Length (cm) | Wound Width (cm) | Wound Depth (cm) | Wound Area (cm <sup>2</sup> ) |
| 64                    | F      | 84  | Arterial   | LLE lat        | 1.2               | 0.7              | 0.1              | 0.84                          |

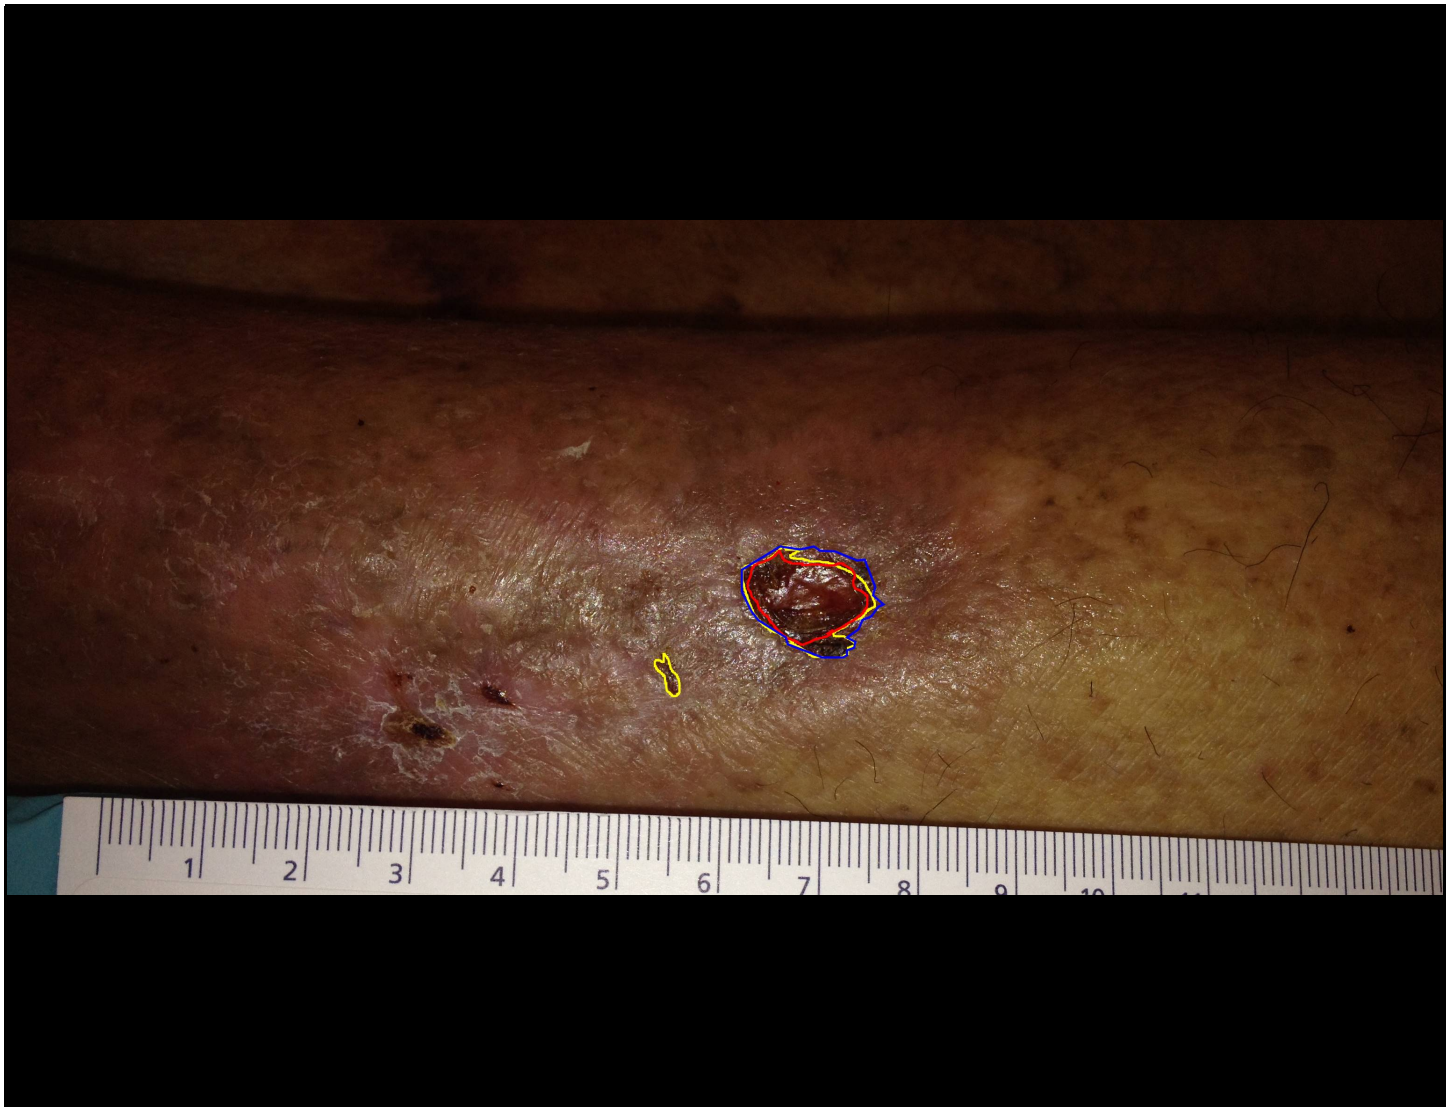

| Tracing Data |                               |                           |                               |
|--------------|-------------------------------|---------------------------|-------------------------------|
| Tracer:      | Wound Area (px <sup>2</sup> ) | Ruler Calibration (px/cm) | Wound Area (cm <sup>2</sup> ) |
| H1           | 49869                         | 229.1                     | 0.95                          |
| H2           | 37106                         | 228.1                     | 0.71                          |
| AI           | 56475                         | 237.6                     | 1.00                          |

| Tracing Comparisons     |                     |                     |                     |                     |
|-------------------------|---------------------|---------------------|---------------------|---------------------|
| Difference Metric:      | Human-Human         |                     | Human-AI            |                     |
|                         | H1(ref)<br>H2(test) | H2(ref)<br>H1(test) | H1(ref)<br>AI(test) | H2(ref)<br>AI(test) |
| False Negative Area (%) | 26.2                | 0.8                 | 5.5                 | 0.0                 |
| False Positive Area (%) | 0.6                 | 35.2                | 18.7                | 52.1                |
| Relative Error (%)      | 25.6                | 34.4                | 13.2                | 52.2                |

| Blinded Attending Surgeon Review |              |                      |                      |                      |              |                         |
|----------------------------------|--------------|----------------------|----------------------|----------------------|--------------|-------------------------|
| Reviewer                         | PGT Estimate | H1 meets definition? | H2 meets definition? | AI meets definition? | Which is AI? | Which is most accurate? |
| 1                                | 0            | No                   | No                   | No                   | H2           | AI                      |
| 2                                | 0            | No                   | No                   | Yes                  | H2           | H1                      |
| 3                                | 100          | Yes                  | Yes                  | Yes                  | H1           | H2                      |

| Wound EMR Information |        |     |            |                |                   |                  |                  |                               |
|-----------------------|--------|-----|------------|----------------|-------------------|------------------|------------------|-------------------------------|
| Sequential Number     | Gender | Age | Wound Type | Wound Location | Wound Length (cm) | Wound Width (cm) | Wound Depth (cm) | Wound Area (cm <sup>2</sup> ) |
| 65                    | F      | 73  | DFU        | R foot         | 1.5               | 1.1              | 0.2              | 1.65                          |

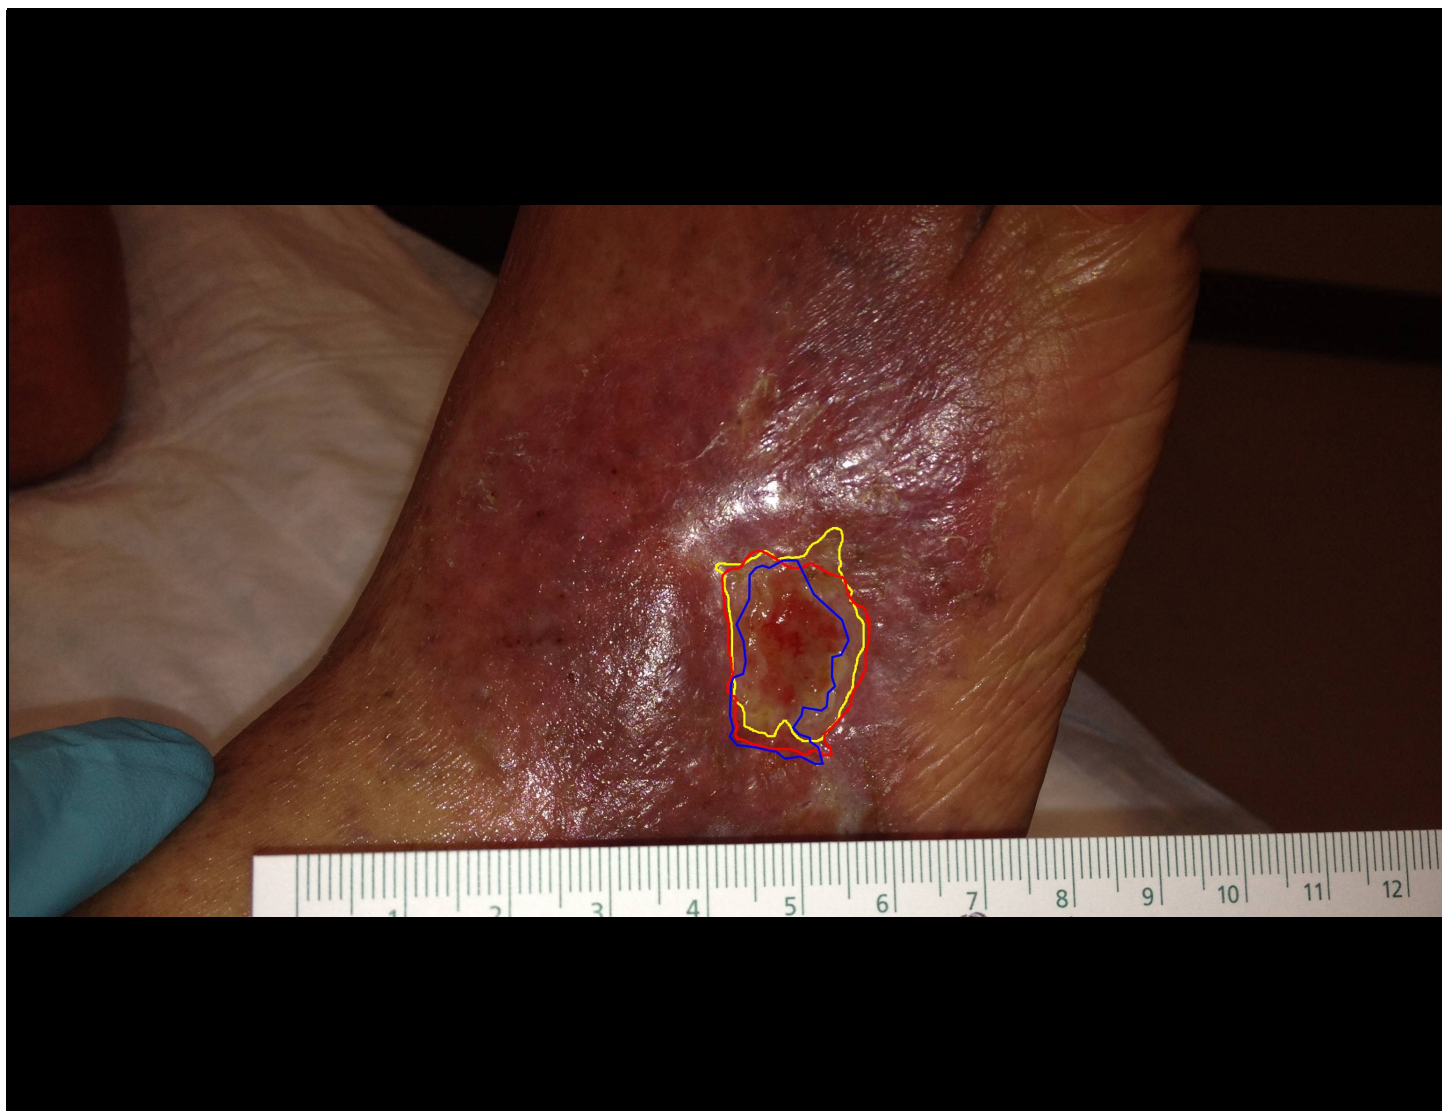

| Tracing Data |                               |                           |                               |
|--------------|-------------------------------|---------------------------|-------------------------------|
| Tracer:      | Wound Area (px <sup>2</sup> ) | Ruler Calibration (px/cm) | Wound Area (cm <sup>2</sup> ) |
| H1           | 110360                        | 214.9                     | 2.39                          |
| H2           | 116689                        | 214.7                     | 2.53                          |
| AI           | 81399                         | 241.1                     | 1.40                          |

| Tracing Comparisons     |                     |                     |                     |                     |
|-------------------------|---------------------|---------------------|---------------------|---------------------|
| Difference Metric:      | Human-Human         |                     | Human-AI            |                     |
|                         | H1(ref)<br>H2(test) | H2(ref)<br>H1(test) | H1(ref)<br>AI(test) | H2(ref)<br>AI(test) |
| False Negative Area (%) | 7.4                 | 12.4                | 36.4                | 33.9                |
| False Positive Area (%) | 13.2                | 7.0                 | 10.2                | 3.6                 |
| Relative Error (%)      | 5.7                 | 5.4                 | 26.2                | 30.2                |

| Blinded Attending Surgeon Review |              |                      |                      |                      |              |                         |
|----------------------------------|--------------|----------------------|----------------------|----------------------|--------------|-------------------------|
| Reviewer                         | PGT Estimate | H1 meets definition? | H2 meets definition? | AI meets definition? | Which is AI? | Which is most accurate? |
| 1                                | 20           | No                   | Yes                  | No                   | H1           | AI                      |
| 2                                | <10          | Yes                  | No                   | No                   | H2           | H1                      |
| 3                                | 80           | No                   | Yes                  | No                   | H2           | H1                      |

| Wound EMR Information |        |     |            |                |                   |                  |                  |                               |
|-----------------------|--------|-----|------------|----------------|-------------------|------------------|------------------|-------------------------------|
| Sequential Number     | Gender | Age | Wound Type | Wound Location | Wound Length (cm) | Wound Width (cm) | Wound Depth (cm) | Wound Area (cm <sup>2</sup> ) |
| 66                    | M      | 82  | Surgical   | L BKA          | 6.8               | 7.0              | 0.3              | 47.60                         |

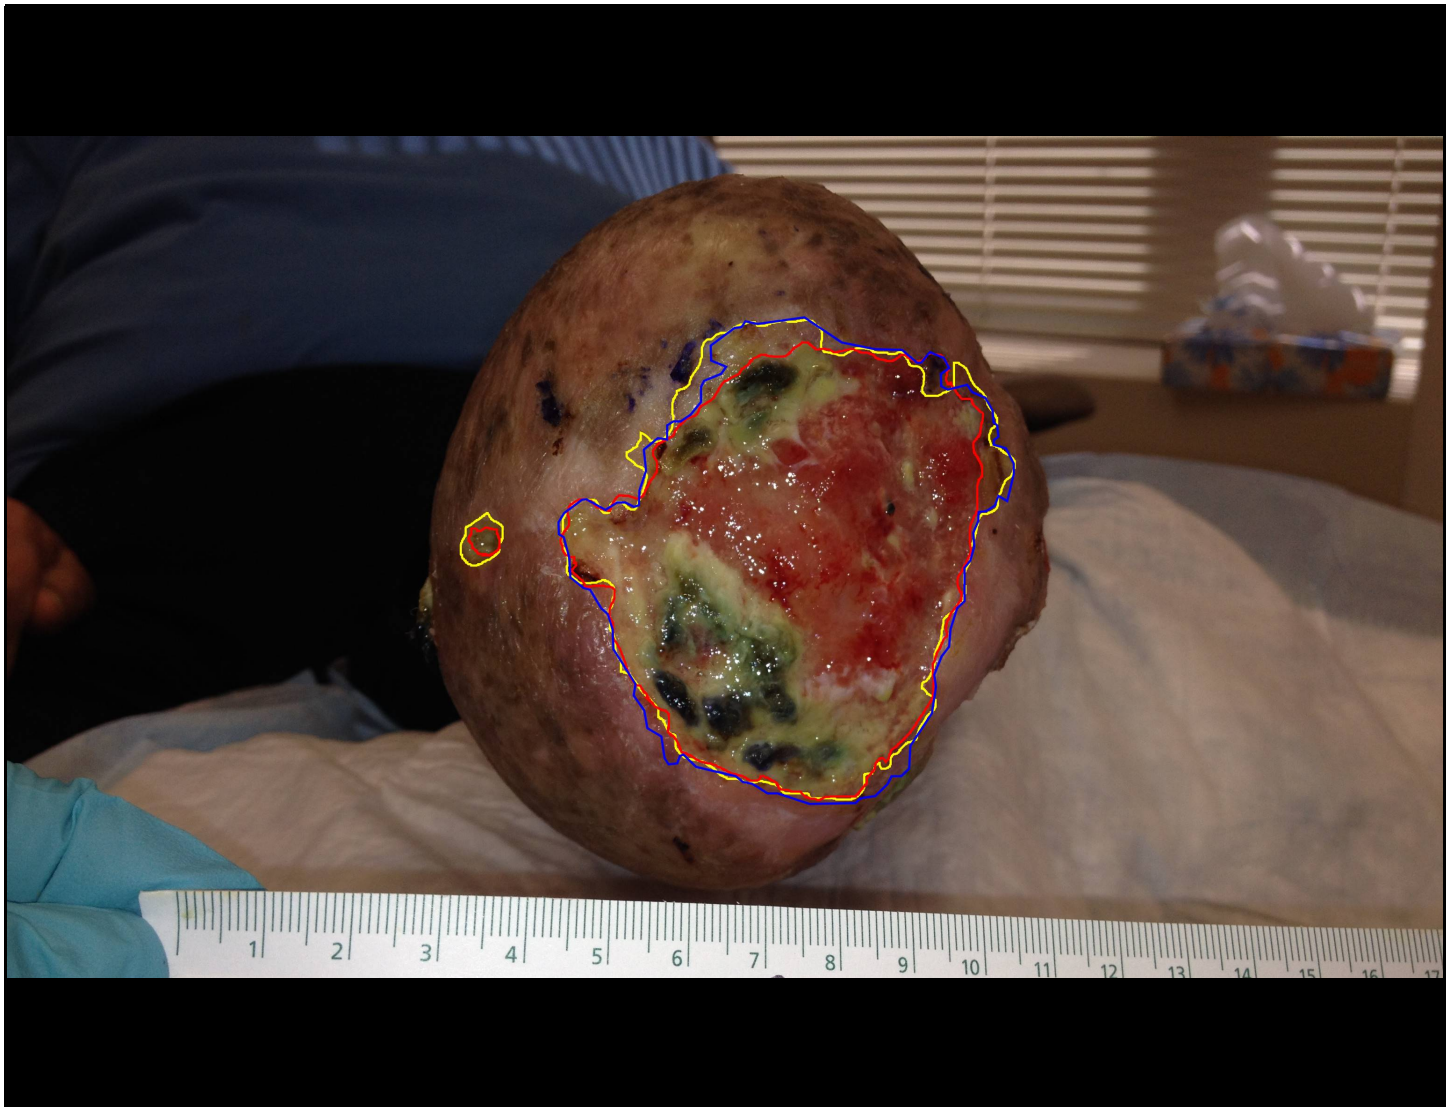

| Tracing Data |                               |                           |                               |
|--------------|-------------------------------|---------------------------|-------------------------------|
| Tracer:      | Wound Area (px <sup>2</sup> ) | Ruler Calibration (px/cm) | Wound Area (cm <sup>2</sup> ) |
| H1           | 733307                        | 181.5                     | 22.26                         |
| H2           | 677335                        | 172.1                     | 22.87                         |
| AI           | 745165                        | 199.1                     | 18.80                         |

| Tracing Comparisons     |                     |                     |                     |                     |
|-------------------------|---------------------|---------------------|---------------------|---------------------|
| Difference Metric:      | Human-Human         |                     | Human-AI            |                     |
|                         | H1(ref)<br>H2(test) | H2(ref)<br>H1(test) | H1(ref)<br>AI(test) | H2(ref)<br>AI(test) |
| False Negative Area (%) | 9.0                 | 1.5                 | 3.1                 | 0.8                 |
| False Positive Area (%) | 1.4                 | 9.8                 | 4.7                 | 10.9                |
| Relative Error (%)      | 7.6                 | 8.3                 | 1.6                 | 10.0                |

| Blinded Attending Surgeon Review |              |                      |                      |                      |              |                         |
|----------------------------------|--------------|----------------------|----------------------|----------------------|--------------|-------------------------|
| Reviewer                         | PGT Estimate | H1 meets definition? | H2 meets definition? | AI meets definition? | Which is AI? | Which is most accurate? |
| 1                                | 30           | Yes                  | Yes                  | No                   | H1           | AI                      |
| 2                                | 10           | Yes                  | Yes                  | No                   | H2           | H1                      |
| 3                                | 70           | No                   | Yes                  | Yes                  | AI           | H1                      |

| Wound EMR Information |        |     |            |                |                   |                  |                  |                               |
|-----------------------|--------|-----|------------|----------------|-------------------|------------------|------------------|-------------------------------|
| Sequential Number     | Gender | Age | Wound Type | Wound Location | Wound Length (cm) | Wound Width (cm) | Wound Depth (cm) | Wound Area (cm <sup>2</sup> ) |
| 67                    | F      | 80  | PU         | L buttock      | 2.1               | 2.0              | 0.1              | 4.20                          |

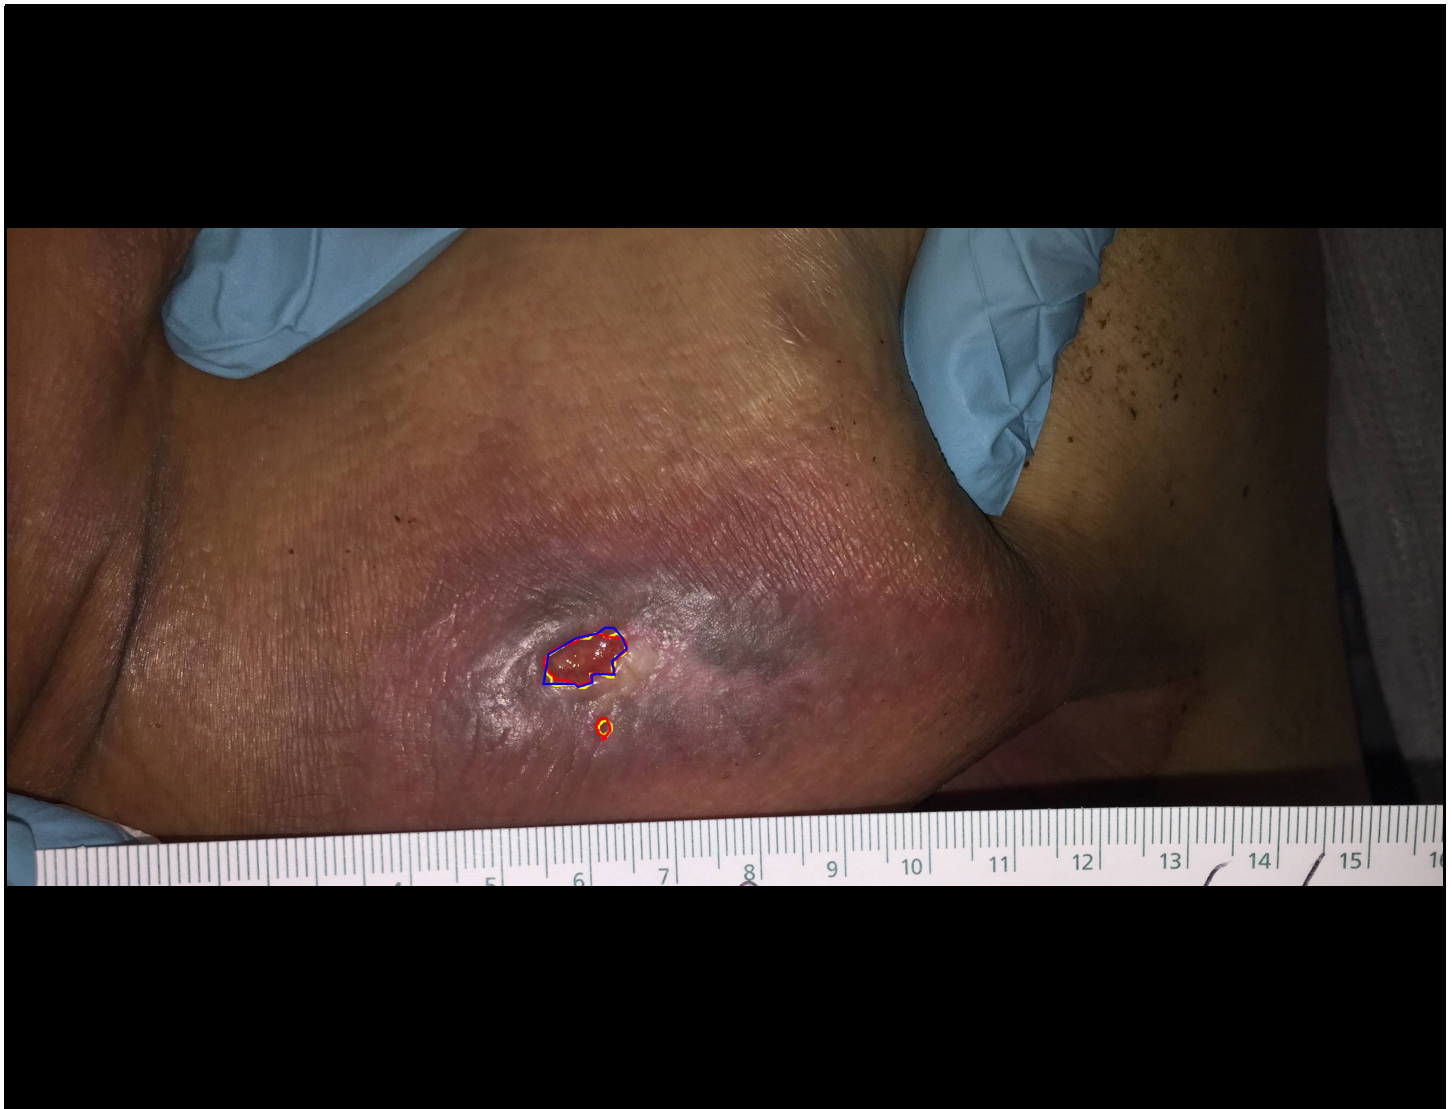

| Tracing Data |                               |                           |                               |
|--------------|-------------------------------|---------------------------|-------------------------------|
| Tracer:      | Wound Area (px <sup>2</sup> ) | Ruler Calibration (px/cm) | Wound Area (cm <sup>2</sup> ) |
| H1           | 15694                         | 195.6                     | 0.41                          |
| H2           | 14922                         | 201.6                     | 0.37                          |
| AI           | 15751                         | 229.1                     | 0.30                          |

| Tracing Comparisons     |                     |                     |                     |                     |
|-------------------------|---------------------|---------------------|---------------------|---------------------|
| Difference Metric:      | Human-Human         |                     | Human-AI            |                     |
|                         | H1(ref)<br>H2(test) | H2(ref)<br>H1(test) | H1(ref)<br>AI(test) | H2(ref)<br>AI(test) |
| False Negative Area (%) | 9.8                 | 5.1                 | 8.5                 | 9.4                 |
| False Positive Area (%) | 4.9                 | 10.3                | 8.8                 | 15.0                |
| Relative Error (%)      | 4.9                 | 5.2                 | 0.4                 | 5.6                 |

| Blinded Attending Surgeon Review |              |                      |                      |                      |              |                         |
|----------------------------------|--------------|----------------------|----------------------|----------------------|--------------|-------------------------|
| Reviewer                         | PGT Estimate | H1 meets definition? | H2 meets definition? | AI meets definition? | Which is AI? | Which is most accurate? |
| 1                                | 100          | Yes                  | Yes                  | No                   | H2           | H2                      |
| 2                                | 50           | Yes                  | Yes                  | No                   | H1           | AI                      |
| 3                                | 40           | No                   | Yes                  | Yes                  | H1           | H2                      |

| Wound EMR Information |        |     |            |                |                   |                  |                  |                               |
|-----------------------|--------|-----|------------|----------------|-------------------|------------------|------------------|-------------------------------|
| Sequential Number     | Gender | Age | Wound Type | Wound Location | Wound Length (cm) | Wound Width (cm) | Wound Depth (cm) | Wound Area (cm <sup>2</sup> ) |
| 68                    | F      | 78  | PU         | sacrum         | 0.0               | 0.0              | 0.0              | 0.00                          |

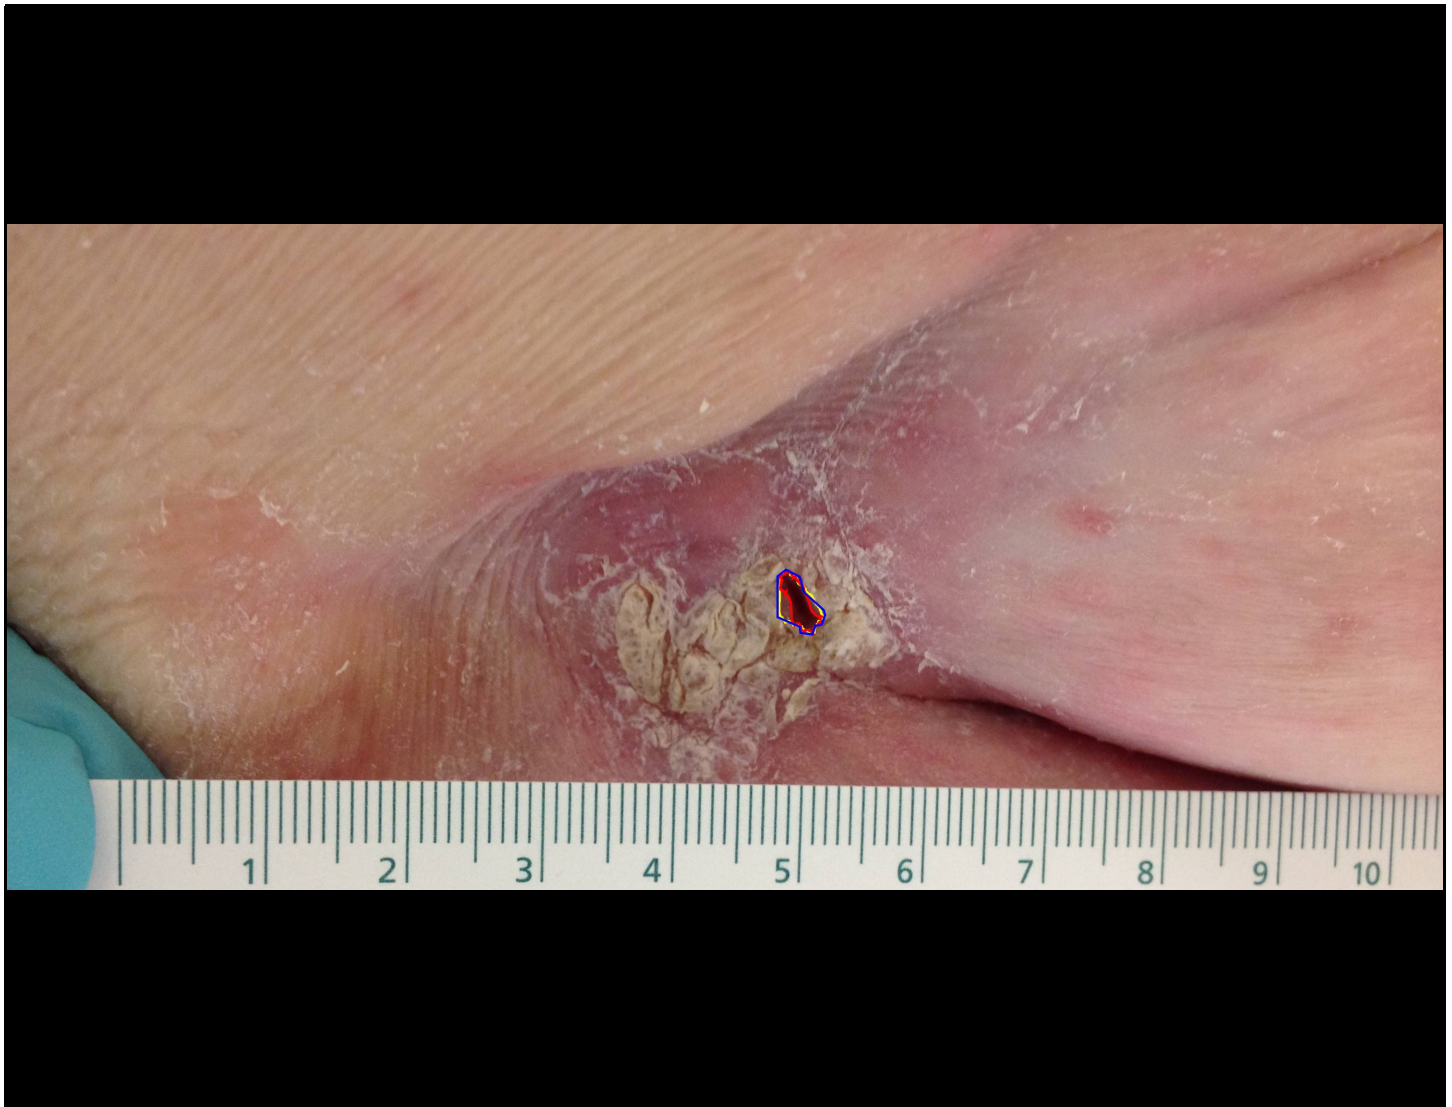

| Tracing Data |                               |                           |                               |
|--------------|-------------------------------|---------------------------|-------------------------------|
| Tracer:      | Wound Area (px <sup>2</sup> ) | Ruler Calibration (px/cm) | Wound Area (cm <sup>2</sup> ) |
| H1           | 8421                          | 290.2                     | 0.10                          |
| H2           | 5809                          | 290.2                     | 0.07                          |
| AI           | 9592                          | 309.7                     | 0.10                          |

| Tracing Comparisons     |                     |                     |                     |                     |
|-------------------------|---------------------|---------------------|---------------------|---------------------|
| Difference Metric:      | Human-Human         |                     | Human-AI            |                     |
|                         | H1(ref)<br>H2(test) | H2(ref)<br>H1(test) | H1(ref)<br>AI(test) | H2(ref)<br>AI(test) |
| False Negative Area (%) | 32.8                | 2.5                 | 3.0                 | 0.5                 |
| False Positive Area (%) | 1.8                 | 47.5                | 16.9                | 65.6                |
| Relative Error (%)      | 31.0                | 45.0                | 13.9                | 65.1                |

| Blinded Attending Surgeon Review |              |                      |                      |                      |              |                         |
|----------------------------------|--------------|----------------------|----------------------|----------------------|--------------|-------------------------|
| Reviewer                         | PGT Estimate | H1 meets definition? | H2 meets definition? | AI meets definition? | Which is AI? | Which is most accurate? |
| 1                                | 0            | No                   | Yes                  | No                   | AI           | AI                      |
| 2                                | 100          | No                   | Yes                  | Yes                  | H2           | AI                      |
| 3                                | 10           | No                   | Yes                  | No                   | H1           | AI                      |

| Wound EMR Information |        |     |            |                |                   |                  |                  |                               |
|-----------------------|--------|-----|------------|----------------|-------------------|------------------|------------------|-------------------------------|
| Sequential Number     | Gender | Age | Wound Type | Wound Location | Wound Length (cm) | Wound Width (cm) | Wound Depth (cm) | Wound Area (cm <sup>2</sup> ) |
| 69                    | M      | 54  | Surgical   | achilles       | 1.9               | 1.6              | 0.2              | 3.04                          |

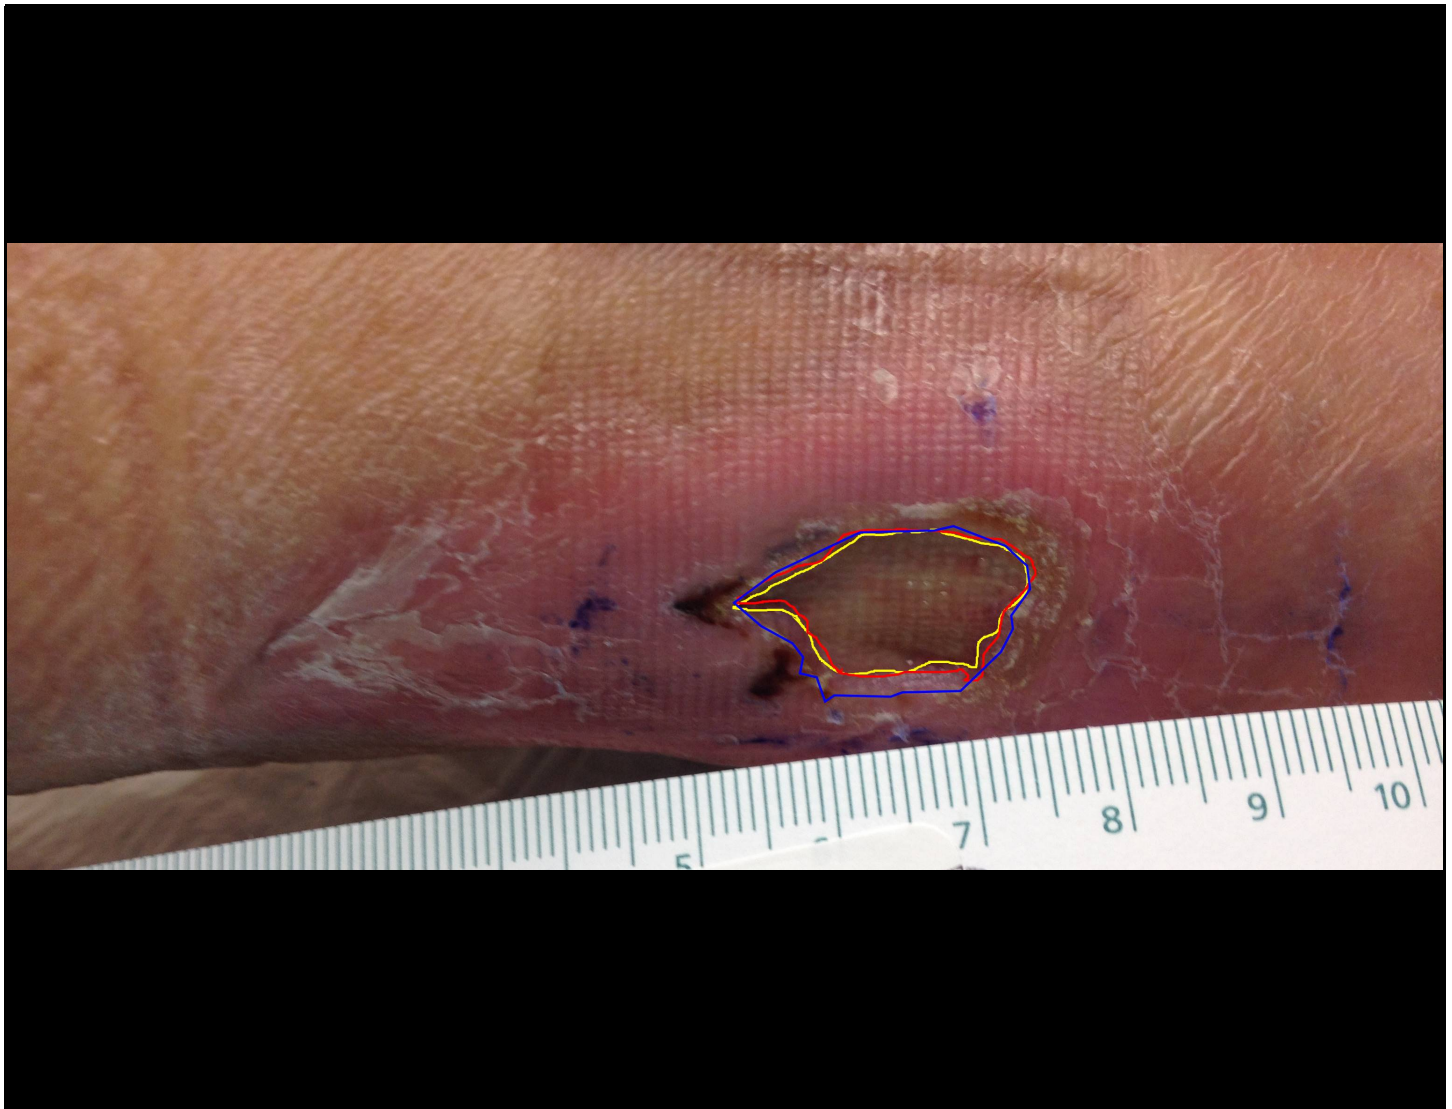

| Tracing Data |                               |                           |                               |
|--------------|-------------------------------|---------------------------|-------------------------------|
| Tracer:      | Wound Area (px <sup>2</sup> ) | Ruler Calibration (px/cm) | Wound Area (cm <sup>2</sup> ) |
| H1           | 137974                        | 329.6                     | 1.27                          |
| H2           | 147784                        | 324.8                     | 1.40                          |
| AI           | 182165                        | 294.5                     | 2.10                          |

| Tracing Comparisons     |                     |                     |                     |                     |
|-------------------------|---------------------|---------------------|---------------------|---------------------|
| Difference Metric:      | Human-Human         |                     | Human-AI            |                     |
|                         | H1(ref)<br>H2(test) | H2(ref)<br>H1(test) | H1(ref)<br>AI(test) | H2(ref)<br>AI(test) |
| False Negative Area (%) | 3.4                 | 9.8                 | 0.2                 | 2.1                 |
| False Positive Area (%) | 10.5                | 3.1                 | 32.2                | 25.4                |
| Relative Error (%)      | 7.1                 | 6.6                 | 32.0                | 23.3                |

| Blinded Attending Surgeon Review |              |                      |                      |                      |              |                         |
|----------------------------------|--------------|----------------------|----------------------|----------------------|--------------|-------------------------|
| Reviewer                         | PGT Estimate | H1 meets definition? | H2 meets definition? | AI meets definition? | Which is AI? | Which is most accurate? |
| 1                                | 0            | Yes                  | No                   | No                   | H1           | H2                      |
| 2                                | 0            | No                   | No                   | No                   | H1           | H1                      |
| 3                                | 0            | Yes                  | Yes                  | No                   | AI           | H2                      |

| Wound EMR Information |        |     |            |                |                   |                  |                  |                               |
|-----------------------|--------|-----|------------|----------------|-------------------|------------------|------------------|-------------------------------|
| Sequential Number     | Gender | Age | Wound Type | Wound Location | Wound Length (cm) | Wound Width (cm) | Wound Depth (cm) | Wound Area (cm <sup>2</sup> ) |
| 70                    | F      | 58  | bursitis   | L elbow        | 0.8               | 0.4              | 0.1              | 0.32                          |

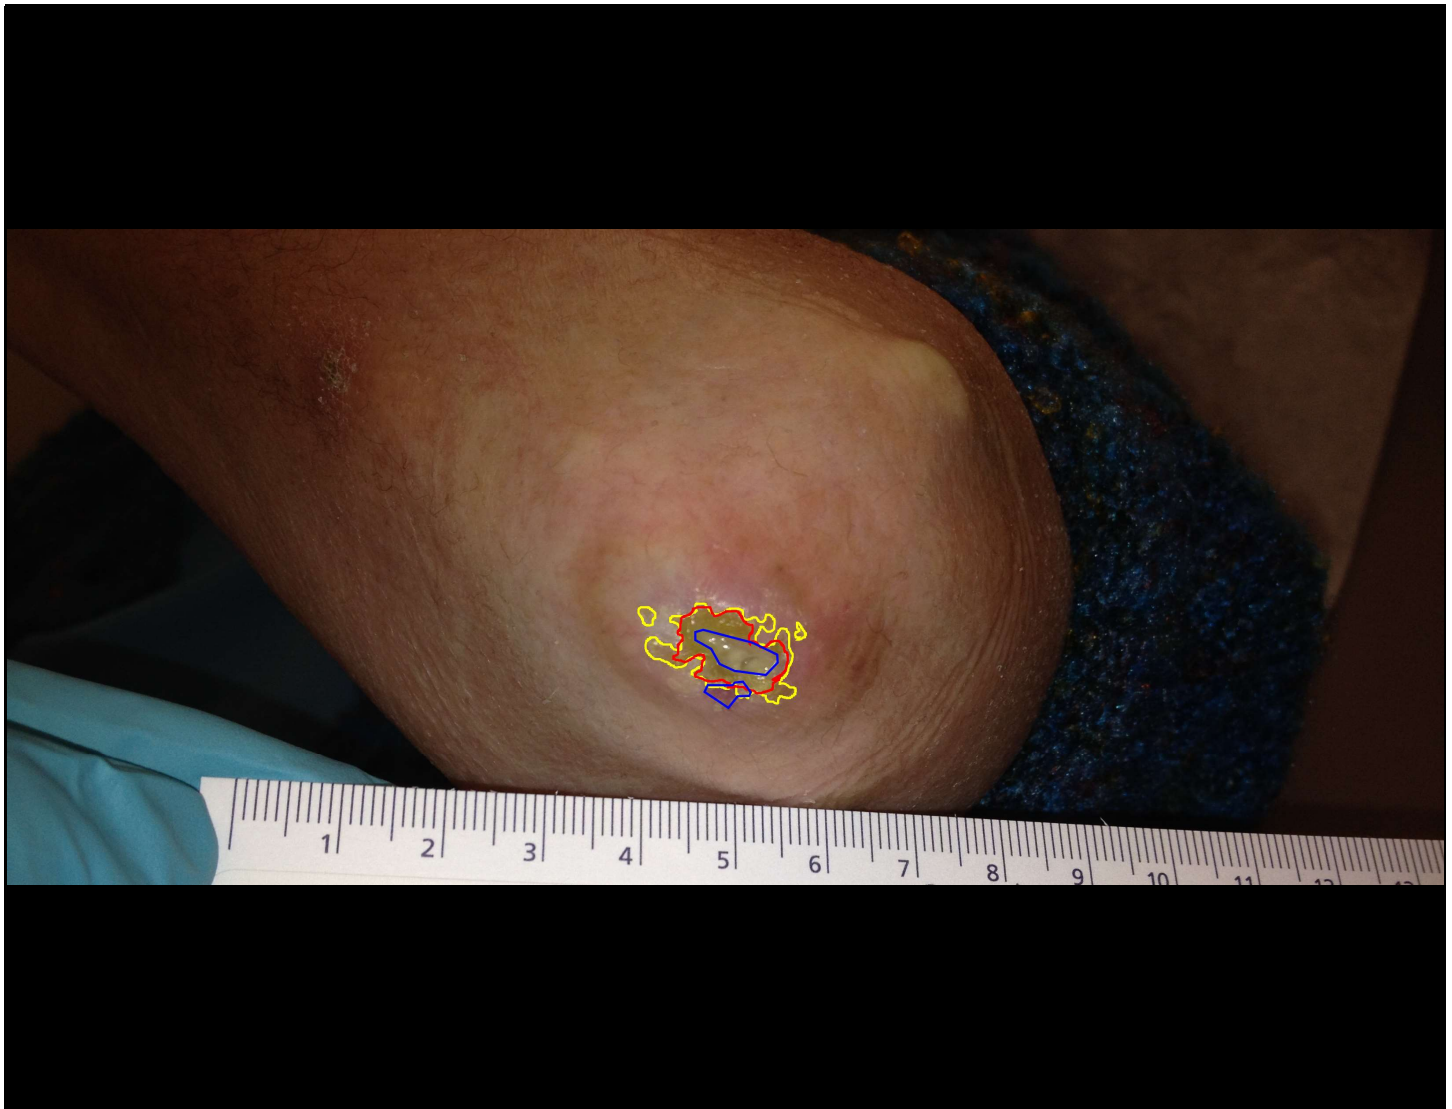

| Tracing Data |                               |                           |                               |
|--------------|-------------------------------|---------------------------|-------------------------------|
| Tracer:      | Wound Area (px <sup>2</sup> ) | Ruler Calibration (px/cm) | Wound Area (cm <sup>2</sup> ) |
| H1           | 43395                         | 219.6                     | 0.90                          |
| H2           | 30797                         | 213.3                     | 0.68                          |
| AI           | 13738                         | 214.0                     | 0.30                          |

| Tracing Comparisons     |                     |                     |                     |                     |
|-------------------------|---------------------|---------------------|---------------------|---------------------|
| Difference Metric:      | Human-Human         |                     | Human-AI            |                     |
|                         | H1(ref)<br>H2(test) | H2(ref)<br>H1(test) | H1(ref)<br>AI(test) | H2(ref)<br>AI(test) |
| False Negative Area (%) | 30.3                | 1.7                 | 73.6                | 65.2                |
| False Positive Area (%) | 1.2                 | 42.6                | 5.2                 | 9.8                 |
| Relative Error (%)      | 29.0                | 40.9                | 68.3                | 55.4                |

| Blinded Attending Surgeon Review |              |                      |                      |                      |              |                         |
|----------------------------------|--------------|----------------------|----------------------|----------------------|--------------|-------------------------|
| Reviewer                         | PGT Estimate | H1 meets definition? | H2 meets definition? | AI meets definition? | Which is AI? | Which is most accurate? |
| 1                                | 0            | Yes                  | Yes                  | No                   | AI           | H1                      |
| 2                                | 0            | Yes                  | Yes                  | No                   | H2           | AI                      |
| 3                                | 0            | No                   | No                   | Yes                  | H2           | H2                      |



| Wound EMR Information |        |     |            |                |                   |                  |                  |                               |
|-----------------------|--------|-----|------------|----------------|-------------------|------------------|------------------|-------------------------------|
| Sequential Number     | Gender | Age | Wound Type | Wound Location | Wound Length (cm) | Wound Width (cm) | Wound Depth (cm) | Wound Area (cm <sup>2</sup> ) |
| 71                    | M      | 50  | PU         | LLE post       | 7.7               | 3.0              | 0.3              | 23.10                         |

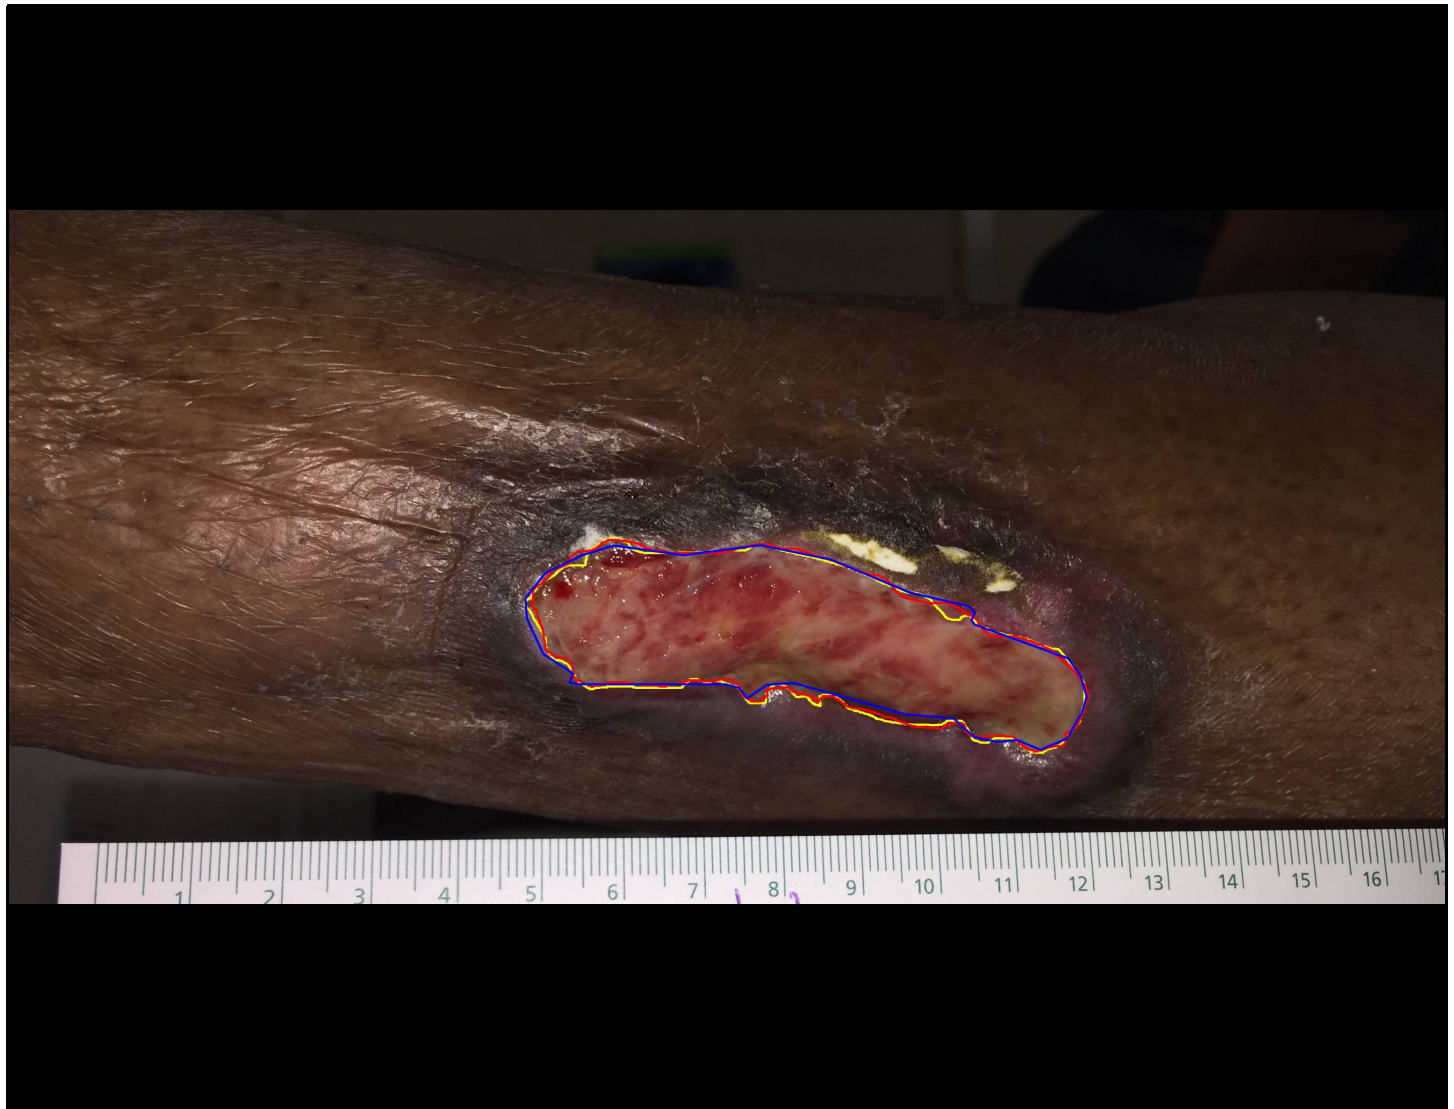

| Tracing Data |                               |                           |                               |
|--------------|-------------------------------|---------------------------|-------------------------------|
| Tracer:      | Wound Area (px <sup>2</sup> ) | Ruler Calibration (px/cm) | Wound Area (cm <sup>2</sup> ) |
| H1           | 349865                        | 178.7                     | 10.95                         |
| H2           | 348524                        | 180.0                     | 10.76                         |
| AI           | 345383                        | 188.7                     | 9.70                          |

| Tracing Comparisons     |                     |                     |                     |                     |
|-------------------------|---------------------|---------------------|---------------------|---------------------|
| Difference Metric:      | Human-Human         |                     | Human-AI            |                     |
|                         | H1(ref)<br>H2(test) | H2(ref)<br>H1(test) | H1(ref)<br>AI(test) | H2(ref)<br>AI(test) |
| False Negative Area (%) | 2.7                 | 2.3                 | 4.2                 | 4.0                 |
| False Positive Area (%) | 2.3                 | 2.7                 | 2.9                 | 3.1                 |
| Relative Error (%)      | 0.4                 | 0.4                 | 1.3                 | 0.9                 |

| Blinded Attending Surgeon Review |              |                      |                      |                      |              |                         |
|----------------------------------|--------------|----------------------|----------------------|----------------------|--------------|-------------------------|
| Reviewer                         | PGT Estimate | H1 meets definition? | H2 meets definition? | AI meets definition? | Which is AI? | Which is most accurate? |
| 1                                | 30           | Yes                  | Yes                  | Yes                  | H1           | H1                      |
| 2                                | 10           | Yes                  | Yes                  | Yes                  | H1           | AI                      |
| 3                                | 30           | Yes                  | Yes                  | Yes                  | H2           | H1                      |

| Wound EMR Information |        |     |            |                |                   |                  |                  |                               |
|-----------------------|--------|-----|------------|----------------|-------------------|------------------|------------------|-------------------------------|
| Sequential Number     | Gender | Age | Wound Type | Wound Location | Wound Length (cm) | Wound Width (cm) | Wound Depth (cm) | Wound Area (cm <sup>2</sup> ) |
| 72                    | M      | 83  | VLU        | RLE lat        | 2.8               | 2.0              | 0.2              | 5.60                          |

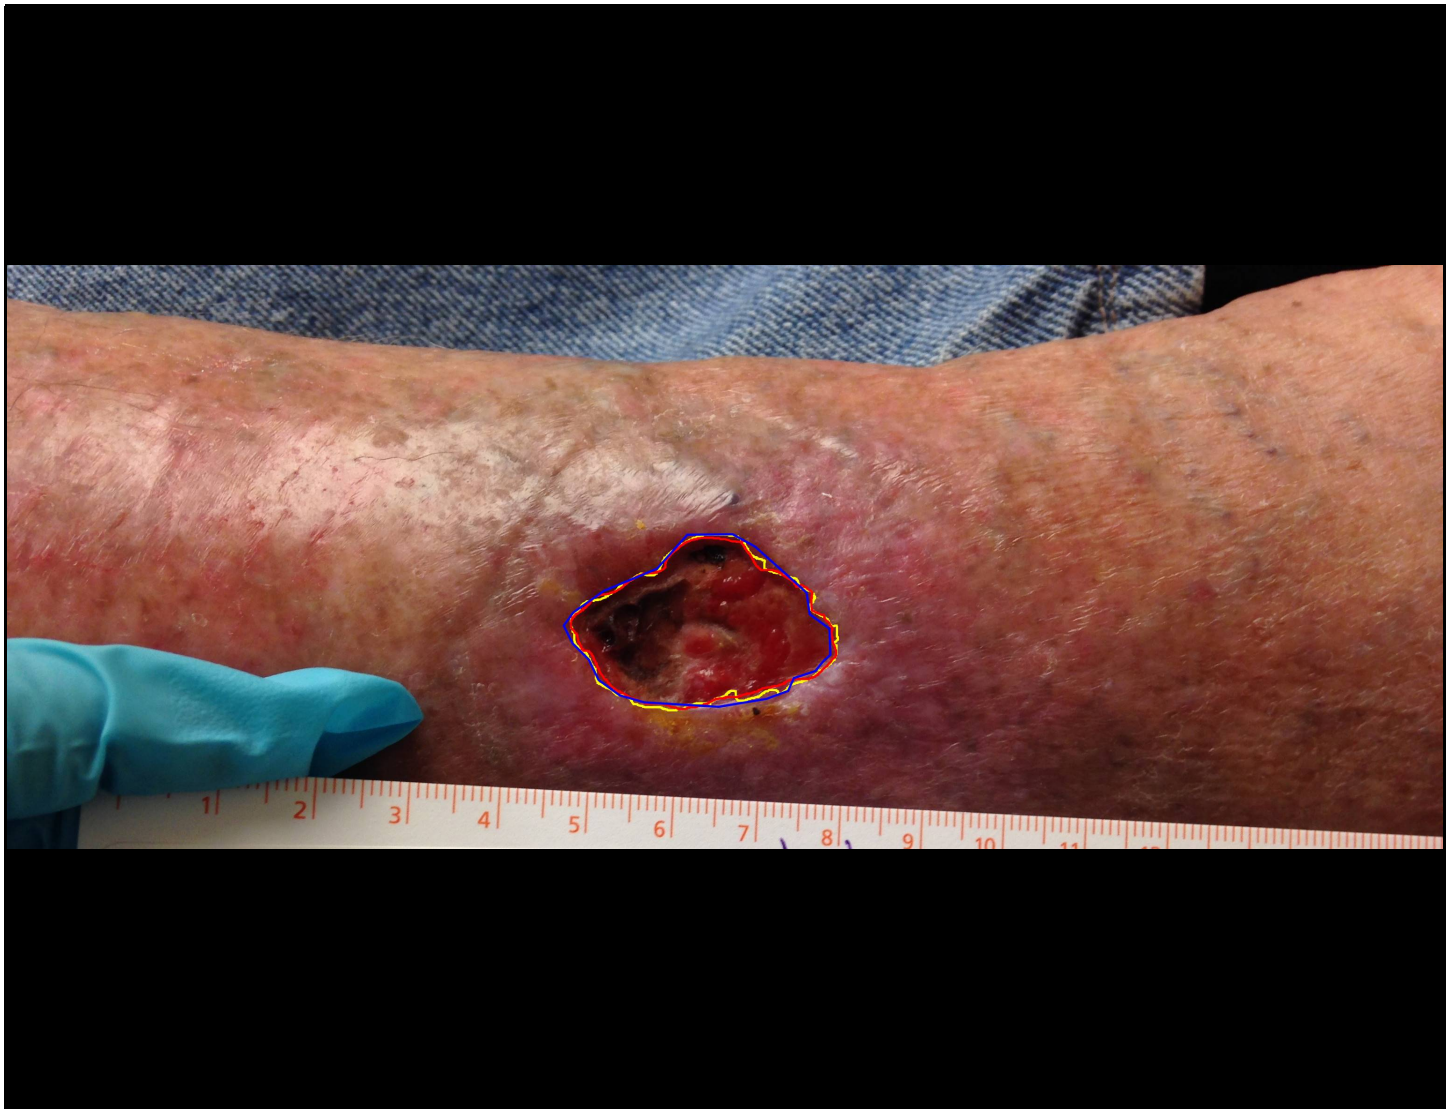

| Tracing Data |                               |                           |                               |
|--------------|-------------------------------|---------------------------|-------------------------------|
| Tracer:      | Wound Area (px <sup>2</sup> ) | Ruler Calibration (px/cm) | Wound Area (cm <sup>2</sup> ) |
| H1           | 161211                        | 196.6                     | 4.17                          |
| H2           | 154565                        | 192.2                     | 4.18                          |
| AI           | 162614                        | 194.5                     | 4.30                          |

| Tracing Comparisons     |                     |                     |                     |                     |
|-------------------------|---------------------|---------------------|---------------------|---------------------|
| Difference Metric:      | Human-Human         |                     | Human-AI            |                     |
|                         | H1(ref)<br>H2(test) | H2(ref)<br>H1(test) | H1(ref)<br>AI(test) | H2(ref)<br>AI(test) |
| False Negative Area (%) | 4.9                 | 0.8                 | 3.3                 | 2.1                 |
| False Positive Area (%) | 0.8                 | 5.1                 | 4.2                 | 7.3                 |
| Relative Error (%)      | 4.1                 | 4.3                 | 0.9                 | 5.2                 |

| Blinded Attending Surgeon Review |              |                      |                      |                      |              |                         |
|----------------------------------|--------------|----------------------|----------------------|----------------------|--------------|-------------------------|
| Reviewer                         | PGT Estimate | H1 meets definition? | H2 meets definition? | AI meets definition? | Which is AI? | Which is most accurate? |
| 1                                | 60           | Yes                  | Yes                  | Yes                  | H1           | H1                      |
| 2                                | 50           | Yes                  | Yes                  | Yes                  | AI           | H2                      |
| 3                                | 60           | Yes                  | Yes                  | Yes                  | AI           | AI                      |

| Wound EMR Information |        |     |            |                |                   |                  |                  |                               |
|-----------------------|--------|-----|------------|----------------|-------------------|------------------|------------------|-------------------------------|
| Sequential Number     | Gender | Age | Wound Type | Wound Location | Wound Length (cm) | Wound Width (cm) | Wound Depth (cm) | Wound Area (cm <sup>2</sup> ) |
| 73                    | F      | 79  | Surgical   | coccyx         | 2.0               | 1.8              | 1.8              | 3.60                          |

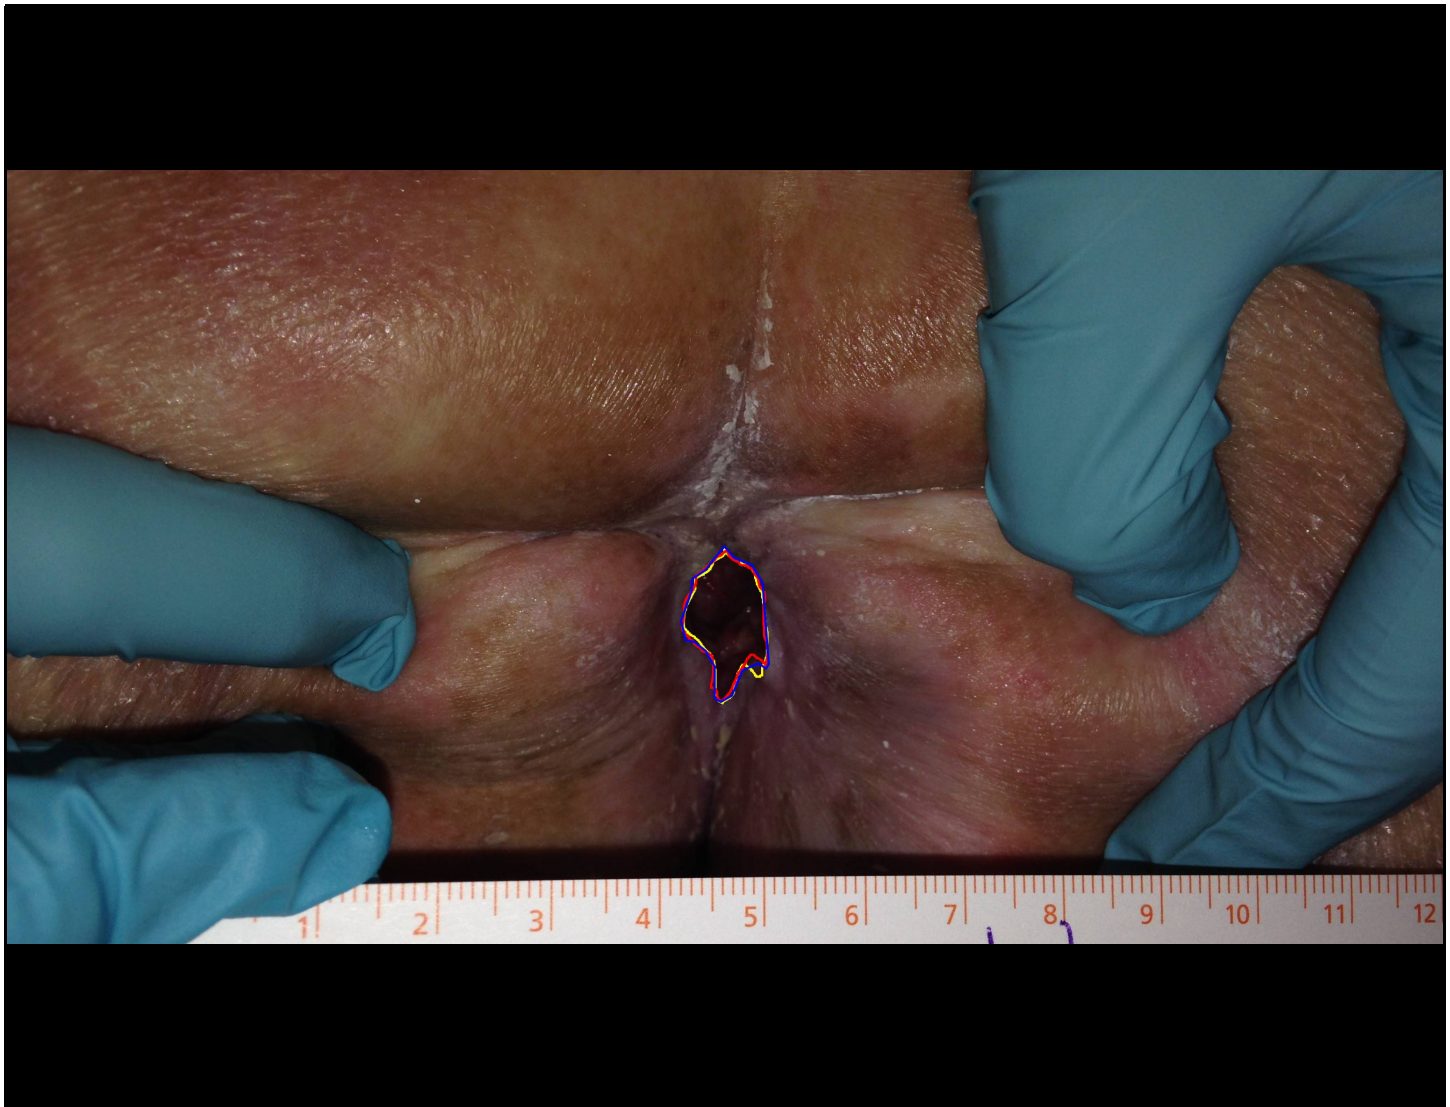

| Tracing Data |                               |                           |                               |
|--------------|-------------------------------|---------------------------|-------------------------------|
| Tracer:      | Wound Area (px <sup>2</sup> ) | Ruler Calibration (px/cm) | Wound Area (cm <sup>2</sup> ) |
| H1           | 39668                         | 236.4                     | 0.71                          |
| H2           | 39806                         | 238.1                     | 0.70                          |
| AI           | 42446                         | 266.0                     | 0.60                          |

| Tracing Comparisons     |                     |                     |                     |                     |
|-------------------------|---------------------|---------------------|---------------------|---------------------|
| Difference Metric:      | Human-Human         |                     | Human-AI            |                     |
|                         | H1(ref)<br>H2(test) | H2(ref)<br>H1(test) | H1(ref)<br>AI(test) | H2(ref)<br>AI(test) |
| False Negative Area (%) | 5.4                 | 5.7                 | 1.7                 | 1.9                 |
| False Positive Area (%) | 5.8                 | 5.4                 | 8.7                 | 8.5                 |
| Relative Error (%)      | 0.3                 | 0.3                 | 7.0                 | 6.6                 |

| Blinded Attending Surgeon Review |              |                      |                      |                      |              |                         |
|----------------------------------|--------------|----------------------|----------------------|----------------------|--------------|-------------------------|
| Reviewer                         | PGT Estimate | H1 meets definition? | H2 meets definition? | AI meets definition? | Which is AI? | Which is most accurate? |
| 1                                |              | Yes                  | Yes                  | Yes                  | AI           | AI                      |
| 2                                |              | No                   | No                   | Yes                  | H1           | H2                      |
| 3                                | 60           | Yes                  | Yes                  | Yes                  | H2           | AI                      |

| Wound EMR Information |        |     |            |                |                   |                  |                  |                               |
|-----------------------|--------|-----|------------|----------------|-------------------|------------------|------------------|-------------------------------|
| Sequential Number     | Gender | Age | Wound Type | Wound Location | Wound Length (cm) | Wound Width (cm) | Wound Depth (cm) | Wound Area (cm <sup>2</sup> ) |
| 74                    | M      | 67  | Surgical   | R 3rd toe      | 0.5               | 0.6              | 0.5              | 0.30                          |

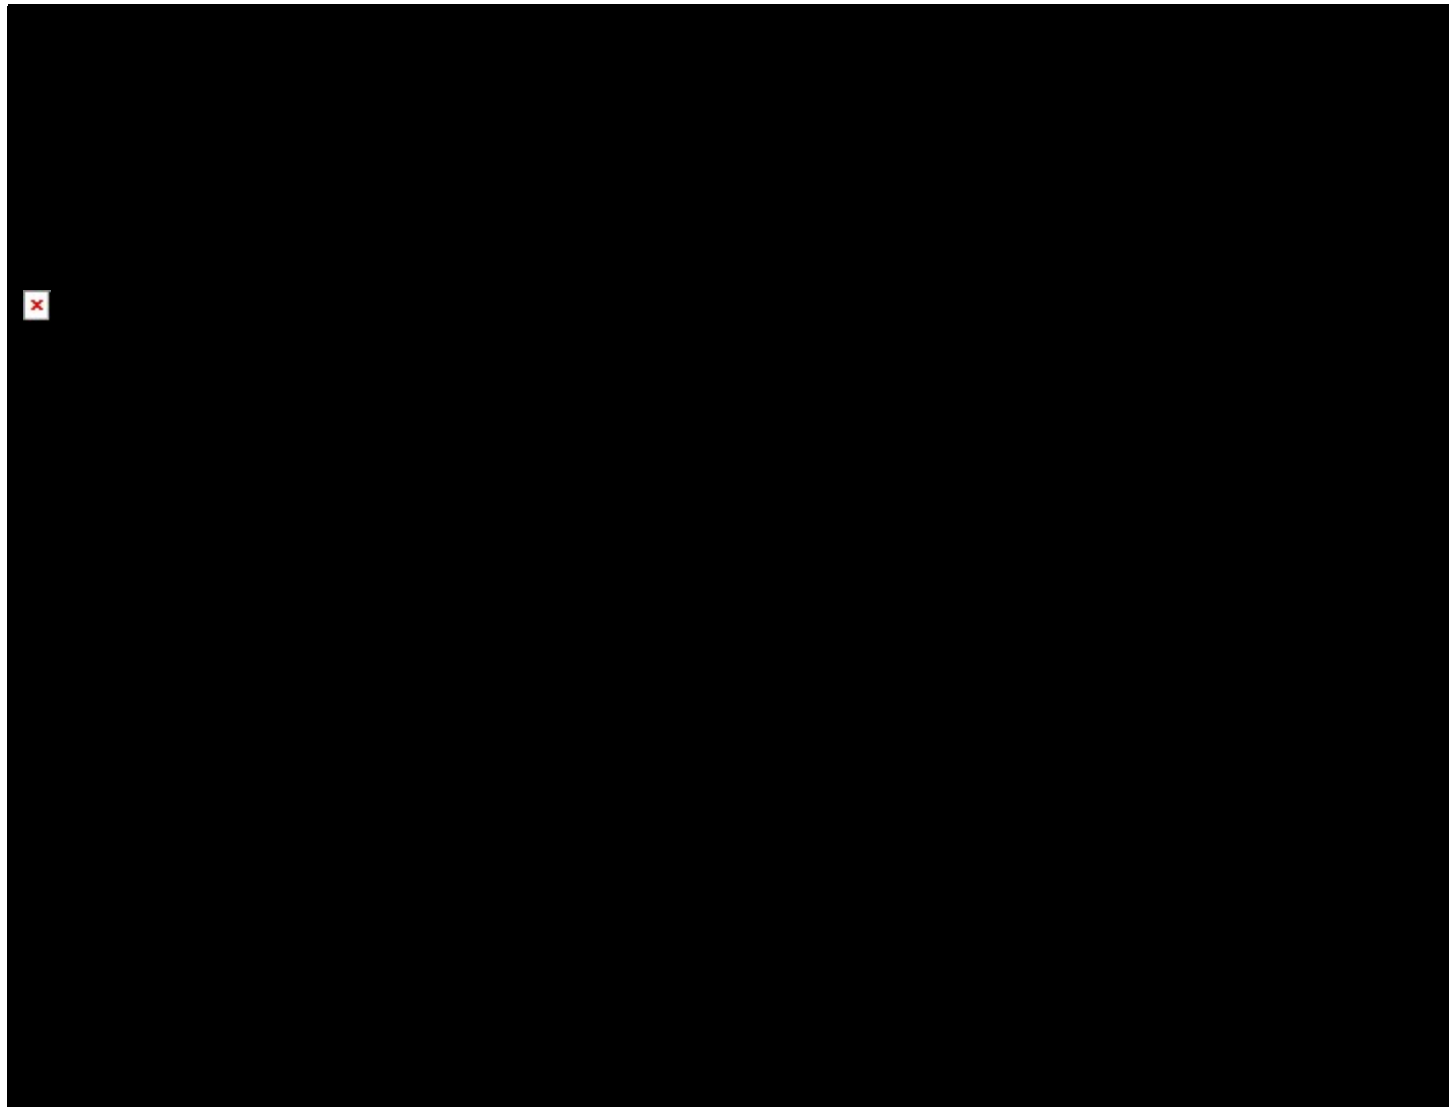

| Tracing Data |                               |                           |                               |
|--------------|-------------------------------|---------------------------|-------------------------------|
| Tracer:      | Wound Area (px <sup>2</sup> ) | Ruler Calibration (px/cm) | Wound Area (cm <sup>2</sup> ) |
| H1           | 12691                         | 169.8                     | 0.44                          |
| H2           | 14515                         | 172.6                     | 0.49                          |
| AI           | 0                             |                           | 0.00                          |

| Tracing Comparisons     |                     |                     |                     |                     |
|-------------------------|---------------------|---------------------|---------------------|---------------------|
| Difference Metric:      | Human-Human         |                     | Human-AI            |                     |
|                         | H1(ref)<br>H2(test) | H2(ref)<br>H1(test) | H1(ref)<br>AI(test) | H2(ref)<br>AI(test) |
| False Negative Area (%) | 32.1                | 40.6                |                     |                     |
| False Positive Area (%) | 46.5                | 28.1                |                     |                     |
| Relative Error (%)      | 14.4                | 12.6                |                     |                     |

| Blinded Attending Surgeon Review |              |                      |                      |                      |              |                         |
|----------------------------------|--------------|----------------------|----------------------|----------------------|--------------|-------------------------|
| Reviewer                         | PGT Estimate | H1 meets definition? | H2 meets definition? | AI meets definition? | Which is AI? | Which is most accurate? |
| 1                                | 0            | Yes                  | Yes                  | Yes                  | 0            | 0                       |
| 2                                | 0            | Yes                  | No                   | No                   | H2           | AI                      |
| 3                                | 0            | Yes                  | No                   | No                   | H1           | AI                      |

| Wound EMR Information |        |     |            |                |                   |                  |                  |                               |
|-----------------------|--------|-----|------------|----------------|-------------------|------------------|------------------|-------------------------------|
| Sequential Number     | Gender | Age | Wound Type | Wound Location | Wound Length (cm) | Wound Width (cm) | Wound Depth (cm) | Wound Area (cm <sup>2</sup> ) |
| 75                    | M      | 74  | VLU        | LLE lat        | 2.5               | 2.2              | 0.1              | 5.50                          |

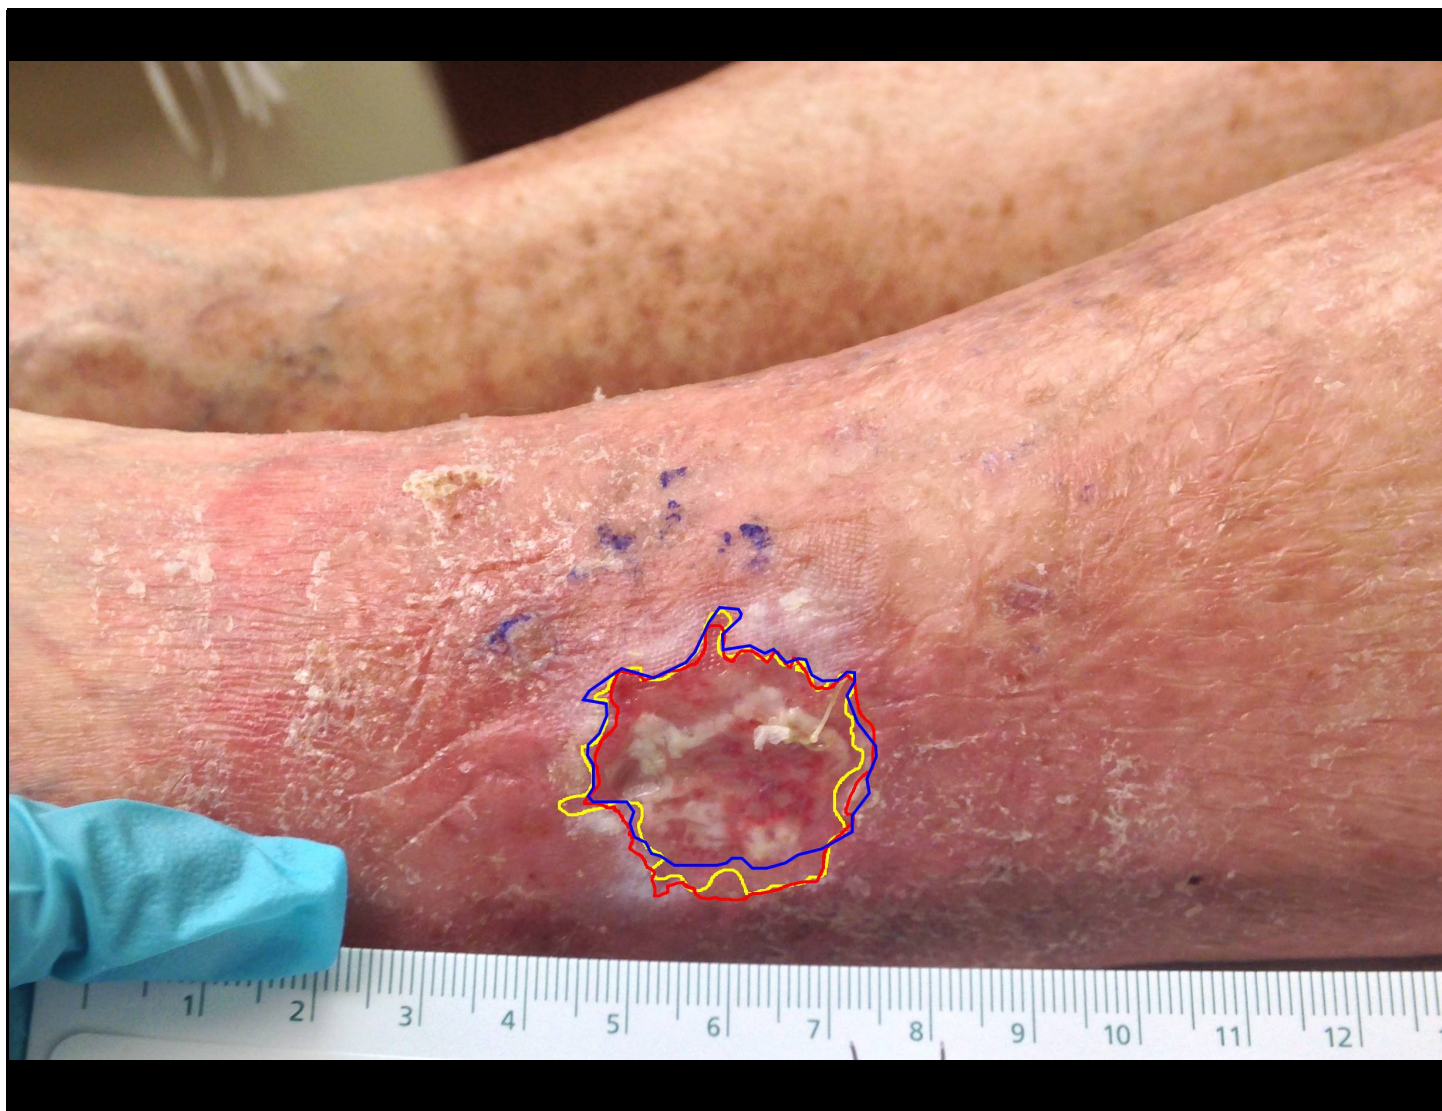

| Tracing Data |                               |                           |                               |
|--------------|-------------------------------|---------------------------|-------------------------------|
| Tracer:      | Wound Area (px <sup>2</sup> ) | Ruler Calibration (px/cm) | Wound Area (cm <sup>2</sup> ) |
| H1           | 145828                        | 172.2                     | 4.92                          |
| H2           | 153079                        | 173.1                     | 5.11                          |
| AI           | 145087                        | 177.6                     | 4.60                          |

| Tracing Comparisons     |                     |                     |                     |                     |
|-------------------------|---------------------|---------------------|---------------------|---------------------|
| Difference Metric:      | Human-Human         |                     | Human-AI            |                     |
|                         | H1(ref)<br>H2(test) | H2(ref)<br>H1(test) | H1(ref)<br>AI(test) | H2(ref)<br>AI(test) |
| False Negative Area (%) | 4.9                 | 9.4                 | 8.7                 | 11.7                |
| False Positive Area (%) | 9.9                 | 4.7                 | 8.2                 | 6.5                 |
| Relative Error (%)      | 5.0                 | 4.7                 | 0.5                 | 5.2                 |

| Blinded Attending Surgeon Review |              |                      |                      |                      |              |                         |
|----------------------------------|--------------|----------------------|----------------------|----------------------|--------------|-------------------------|
| Reviewer                         | PGT Estimate | H1 meets definition? | H2 meets definition? | AI meets definition? | Which is AI? | Which is most accurate? |
| 1                                | 60           | No                   | No                   | Yes                  | H2           | H1                      |
| 2                                | 0            | No                   | No                   | Yes                  | H2           | H1                      |
| 3                                | 70           | No                   | No                   | Yes                  | H1           | H1                      |

| Wound EMR Information |        |     |            |                |                   |                  |                  |                               |
|-----------------------|--------|-----|------------|----------------|-------------------|------------------|------------------|-------------------------------|
| Sequential Number     | Gender | Age | Wound Type | Wound Location | Wound Length (cm) | Wound Width (cm) | Wound Depth (cm) | Wound Area (cm <sup>2</sup> ) |
| 76                    | M      | 63  | DFU        | L plantar      | 3.4               | 2.5              | 0.3              | 8.50                          |

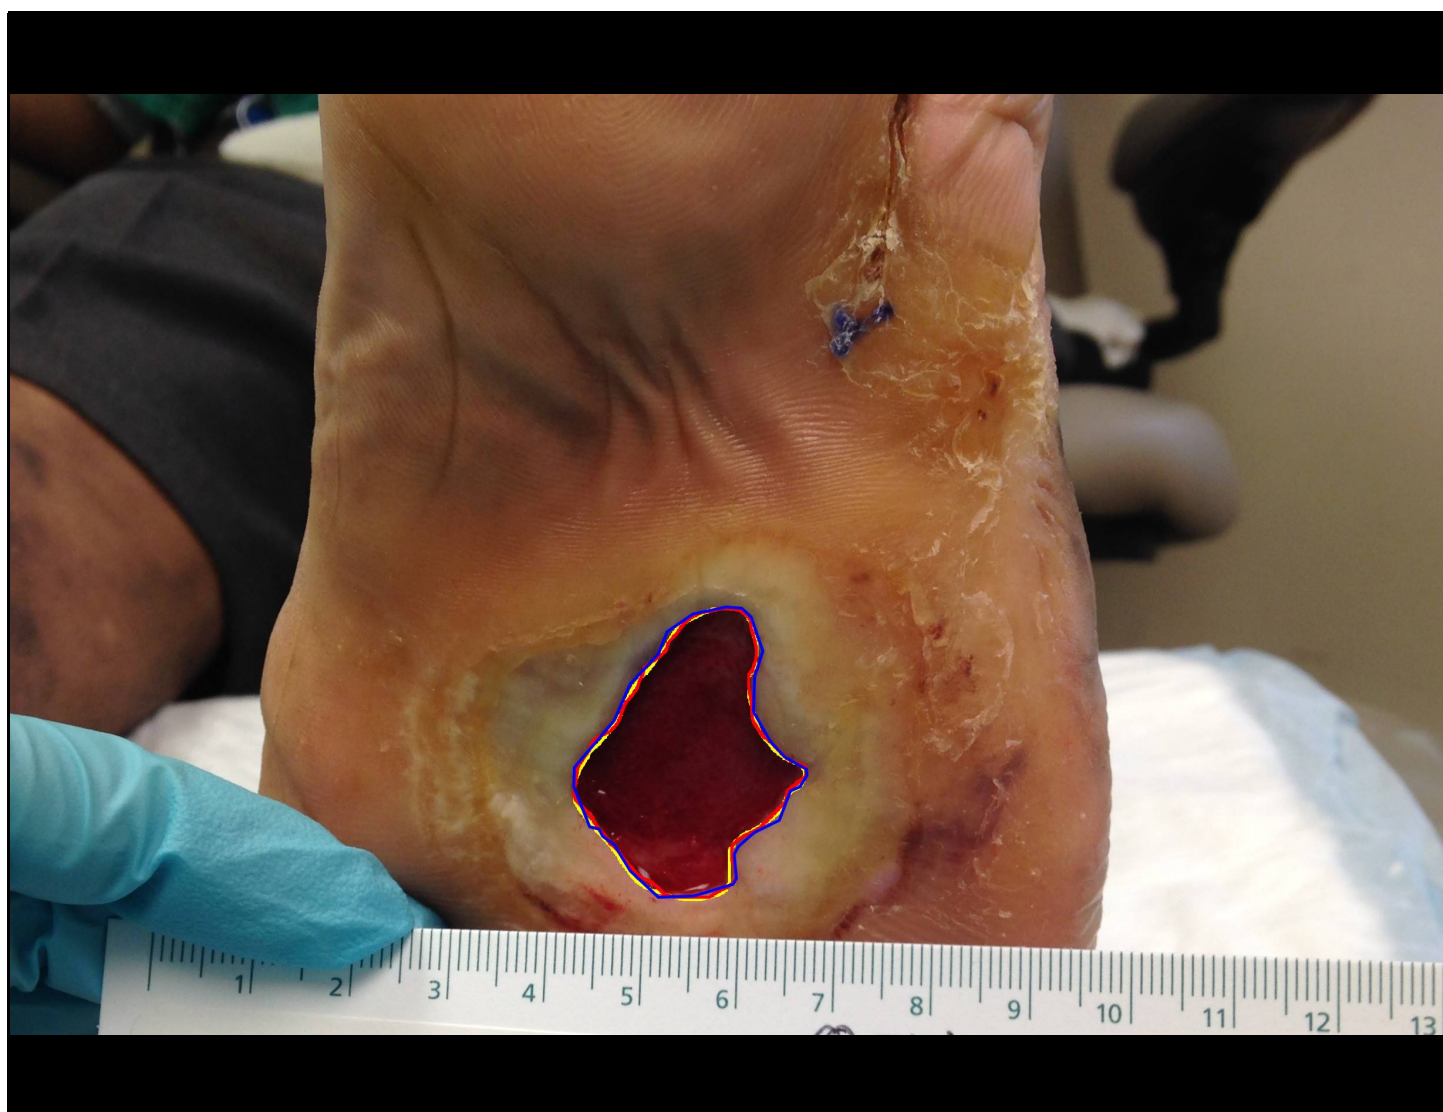

| Tracing Data |                               |                           |                               |
|--------------|-------------------------------|---------------------------|-------------------------------|
| Tracer:      | Wound Area (px <sup>2</sup> ) | Ruler Calibration (px/cm) | Wound Area (cm <sup>2</sup> ) |
| H1           | 113616                        | 162.9                     | 4.28                          |
| H2           | 112351                        | 162.1                     | 4.28                          |
| AI           | 117861                        | 160.1                     | 4.60                          |

| Tracing Comparisons     |                     |                     |                     |                     |
|-------------------------|---------------------|---------------------|---------------------|---------------------|
| Difference Metric:      | Human-Human         |                     | Human-AI            |                     |
|                         | H1(ref)<br>H2(test) | H2(ref)<br>H1(test) | H1(ref)<br>AI(test) | H2(ref)<br>AI(test) |
| False Negative Area (%) | 2.7                 | 1.6                 | 1.4                 | 0.6                 |
| False Positive Area (%) | 1.6                 | 2.7                 | 5.2                 | 5.5                 |
| Relative Error (%)      | 1.1                 | 1.1                 | 3.7                 | 4.9                 |

| Blinded Attending Surgeon Review |              |                      |                      |                      |              |                         |
|----------------------------------|--------------|----------------------|----------------------|----------------------|--------------|-------------------------|
| Reviewer                         | PGT Estimate | H1 meets definition? | H2 meets definition? | AI meets definition? | Which is AI? | Which is most accurate? |
| 1                                | 100          | Yes                  | Yes                  | Yes                  | AI           | AI                      |
| 2                                | 100          | Yes                  | Yes                  | Yes                  | AI           | AI                      |
| 3                                | 50           | Yes                  | Yes                  | Yes                  | H2           | H1                      |

| Wound EMR Information |        |     |            |                |                   |                  |                  |                               |
|-----------------------|--------|-----|------------|----------------|-------------------|------------------|------------------|-------------------------------|
| Sequential Number     | Gender | Age | Wound Type | Wound Location | Wound Length (cm) | Wound Width (cm) | Wound Depth (cm) | Wound Area (cm <sup>2</sup> ) |
| 77                    | M      | 95  | PU         | LLE lat        | 0.7               | 0.6              | 0.2              | 0.42                          |

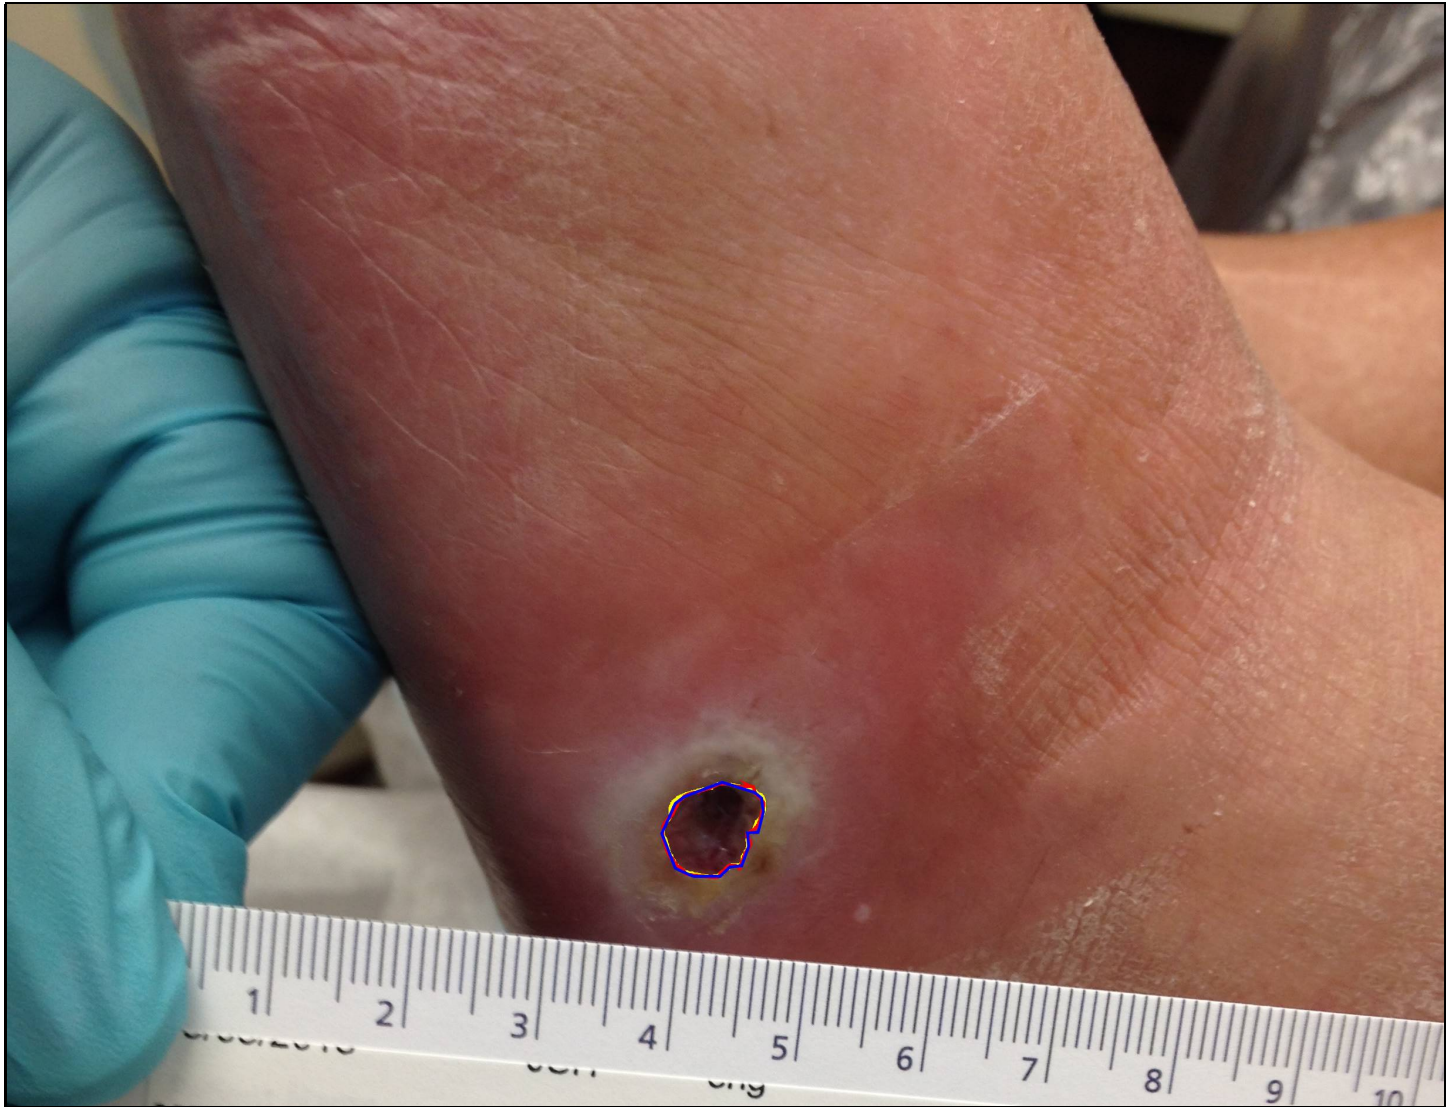

| Tracing Data |                               |                           |                               |
|--------------|-------------------------------|---------------------------|-------------------------------|
| Tracer:      | Wound Area (px <sup>2</sup> ) | Ruler Calibration (px/cm) | Wound Area (cm <sup>2</sup> ) |
| H1           | 19801                         | 219.8                     | 0.41                          |
| H2           | 19794                         | 222.2                     | 0.40                          |
| AI           | 20064                         | 224.0                     | 0.40                          |

| Tracing Comparisons     |                     |                     |                     |                     |
|-------------------------|---------------------|---------------------|---------------------|---------------------|
| Difference Metric:      | Human-Human         |                     | Human-AI            |                     |
|                         | H1(ref)<br>H2(test) | H2(ref)<br>H1(test) | H1(ref)<br>AI(test) | H2(ref)<br>AI(test) |
| False Negative Area (%) | 3.1                 | 3.1                 | 2.4                 | 2.2                 |
| False Positive Area (%) | 3.1                 | 3.1                 | 3.7                 | 3.5                 |
| Relative Error (%)      | 0.0                 | 0.0                 | 1.3                 | 1.4                 |

| Blinded Attending Surgeon Review |              |                      |                      |                      |              |                         |
|----------------------------------|--------------|----------------------|----------------------|----------------------|--------------|-------------------------|
| Reviewer                         | PGT Estimate | H1 meets definition? | H2 meets definition? | AI meets definition? | Which is AI? | Which is most accurate? |
| 1                                | 0            | Yes                  | Yes                  | Yes                  | AI           | H1                      |
| 2                                |              | Yes                  | Yes                  | Yes                  | AI           | H2                      |
| 3                                | 70           | Yes                  | Yes                  | Yes                  | H1           | AI                      |

| Wound EMR Information |        |     |            |                |                   |                  |                  |                               |
|-----------------------|--------|-----|------------|----------------|-------------------|------------------|------------------|-------------------------------|
| Sequential Number     | Gender | Age | Wound Type | Wound Location | Wound Length (cm) | Wound Width (cm) | Wound Depth (cm) | Wound Area (cm <sup>2</sup> ) |
| 78                    | M      | 67  | Arterial   | RLE med        | 2.2               | 1.0              | 0.2              | 2.20                          |

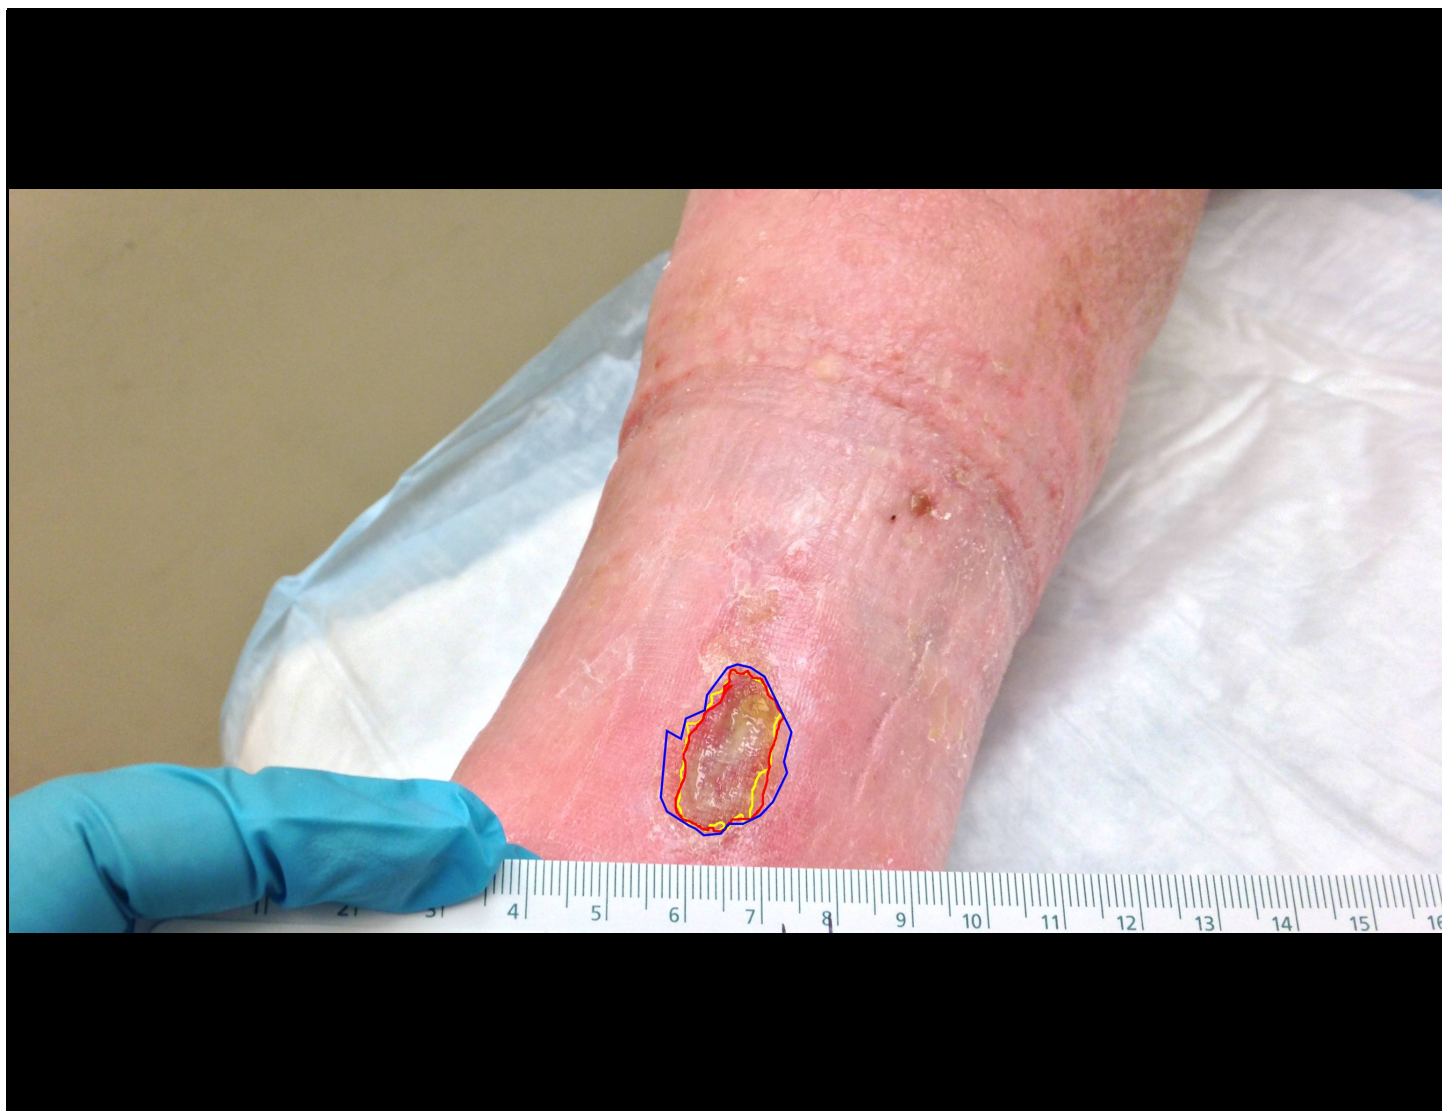

| Tracing Data |                               |                           |                               |
|--------------|-------------------------------|---------------------------|-------------------------------|
| Tracer:      | Wound Area (px <sup>2</sup> ) | Ruler Calibration (px/cm) | Wound Area (cm <sup>2</sup> ) |
| H1           | 55722                         | 175.0                     | 1.82                          |
| H2           | 57100                         | 172.7                     | 1.91                          |
| AI           | 78522                         | 180.9                     | 2.40                          |

| Tracing Comparisons     |                     |                     |                     |                     |
|-------------------------|---------------------|---------------------|---------------------|---------------------|
| Difference Metric:      | Human-Human         |                     | Human-AI            |                     |
|                         | H1(ref)<br>H2(test) | H2(ref)<br>H1(test) | H1(ref)<br>AI(test) | H2(ref)<br>AI(test) |
| False Negative Area (%) | 4.5                 | 6.8                 | 0.1                 | 0.1                 |
| False Positive Area (%) | 6.9                 | 4.4                 | 41.0                | 37.6                |
| Relative Error (%)      | 2.5                 | 2.4                 | 40.9                | 37.5                |

| Blinded Attending Surgeon Review |              |                      |                      |                      |              |                         |
|----------------------------------|--------------|----------------------|----------------------|----------------------|--------------|-------------------------|
| Reviewer                         | PGT Estimate | H1 meets definition? | H2 meets definition? | AI meets definition? | Which is AI? | Which is most accurate? |
| 1                                | 20           | Yes                  | Yes                  | No                   | H2           | AI                      |
| 2                                | <10          | Yes                  | Yes                  | No                   | H2           | H2                      |
| 3                                | 20           | Yes                  | Yes                  | No                   | H1           | H2                      |



| Wound EMR Information |        |     |            |                |                   |                  |                  |                               |
|-----------------------|--------|-----|------------|----------------|-------------------|------------------|------------------|-------------------------------|
| Sequential Number     | Gender | Age | Wound Type | Wound Location | Wound Length (cm) | Wound Width (cm) | Wound Depth (cm) | Wound Area (cm <sup>2</sup> ) |
| 79                    | F      | 85  | Trauma     | LLE lat        | 6.0               | 4.5              | 0.4              | 27.00                         |

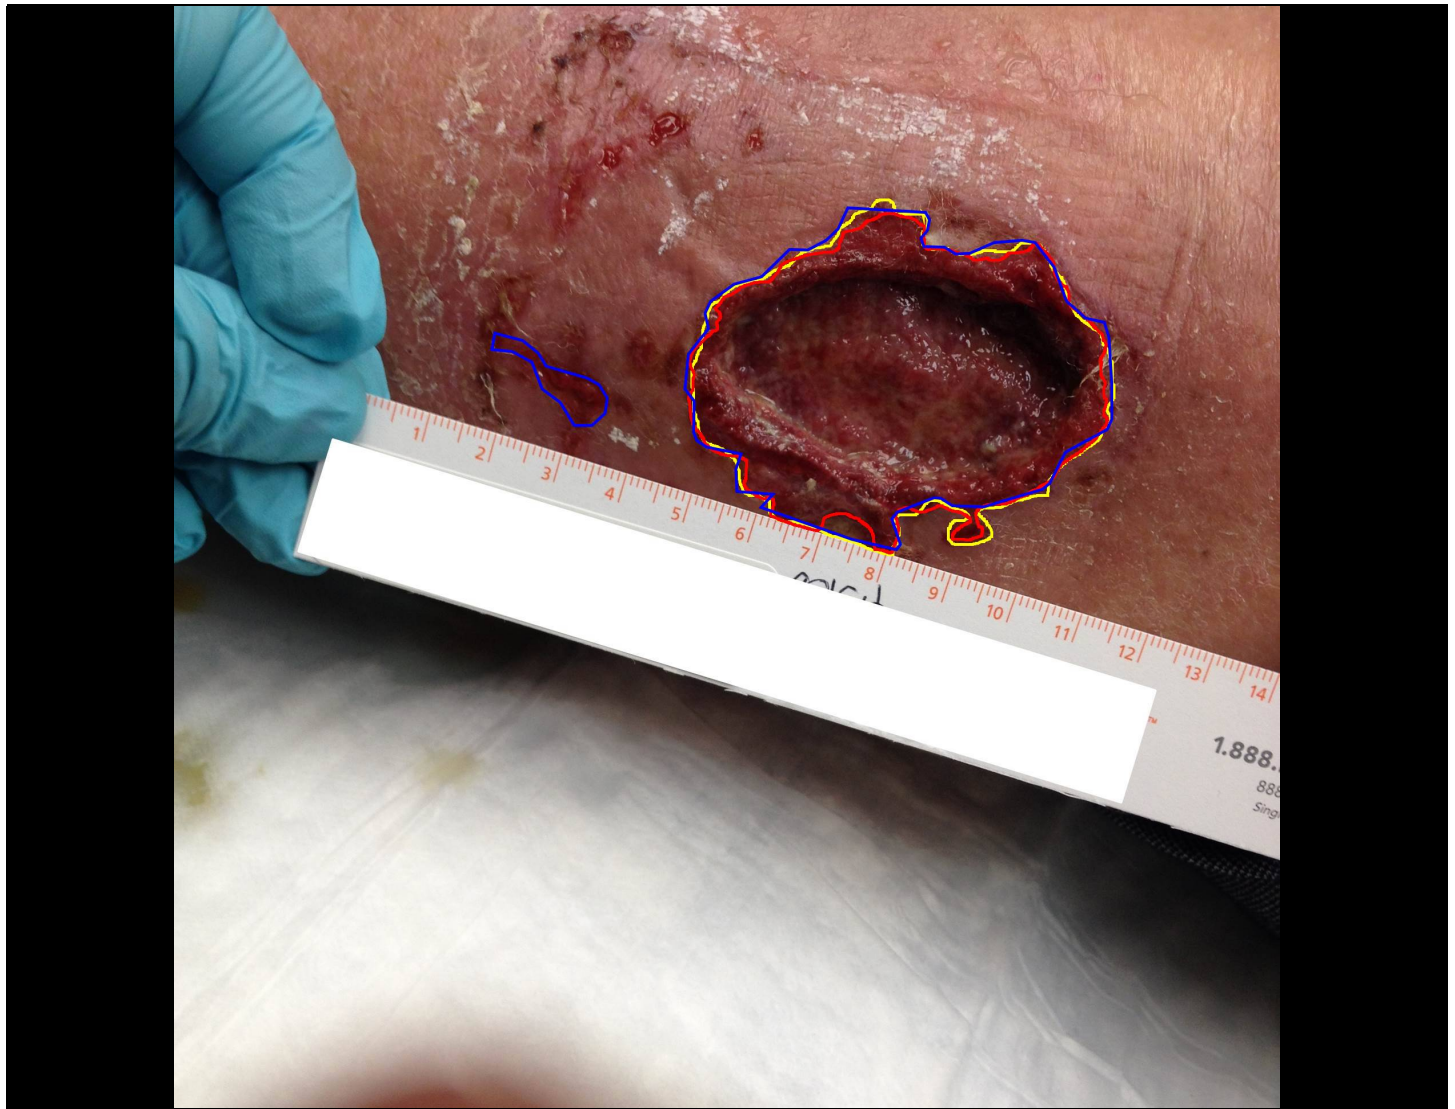

| Tracing Data |                               |                           |                               |
|--------------|-------------------------------|---------------------------|-------------------------------|
| Tracer:      | Wound Area (px <sup>2</sup> ) | Ruler Calibration (px/cm) | Wound Area (cm <sup>2</sup> ) |
| H1           | 309494                        | 123.1                     | 20.41                         |
| H2           | 295831                        | 117.3                     | 21.51                         |
| AI           | 317544                        | 122.4                     | 21.20                         |

| Tracing Comparisons     |                     |                     |                     |                     |
|-------------------------|---------------------|---------------------|---------------------|---------------------|
| Difference Metric:      | Human-Human         |                     | Human-AI            |                     |
|                         | H1(ref)<br>H2(test) | H2(ref)<br>H1(test) | H1(ref)<br>AI(test) | H2(ref)<br>AI(test) |
| False Negative Area (%) | 5.4                 | 1.0                 | 3.1                 | 2.1                 |
| False Positive Area (%) | 1.0                 | 5.6                 | 5.7                 | 9.4                 |
| Relative Error (%)      | 4.4                 | 4.6                 | 2.6                 | 7.3                 |

| Blinded Attending Surgeon Review |              |                      |                      |                      |              |                         |
|----------------------------------|--------------|----------------------|----------------------|----------------------|--------------|-------------------------|
| Reviewer                         | PGT Estimate | H1 meets definition? | H2 meets definition? | AI meets definition? | Which is AI? | Which is most accurate? |
| 1                                |              | Yes                  | No                   | No                   | AI           | H2                      |
| 2                                | 0            | No                   | No                   | No                   | H1           | AI                      |
| 3                                | 100          | Yes                  | No                   | No                   | H1           | H2                      |

| Wound EMR Information |        |     |            |                |                   |                  |                  |                               |
|-----------------------|--------|-----|------------|----------------|-------------------|------------------|------------------|-------------------------------|
| Sequential Number     | Gender | Age | Wound Type | Wound Location | Wound Length (cm) | Wound Width (cm) | Wound Depth (cm) | Wound Area (cm <sup>2</sup> ) |
| 80                    | F      | 78  | PU         | R ankle        | 4.6               | 2.9              | 0.6              | 13.34                         |

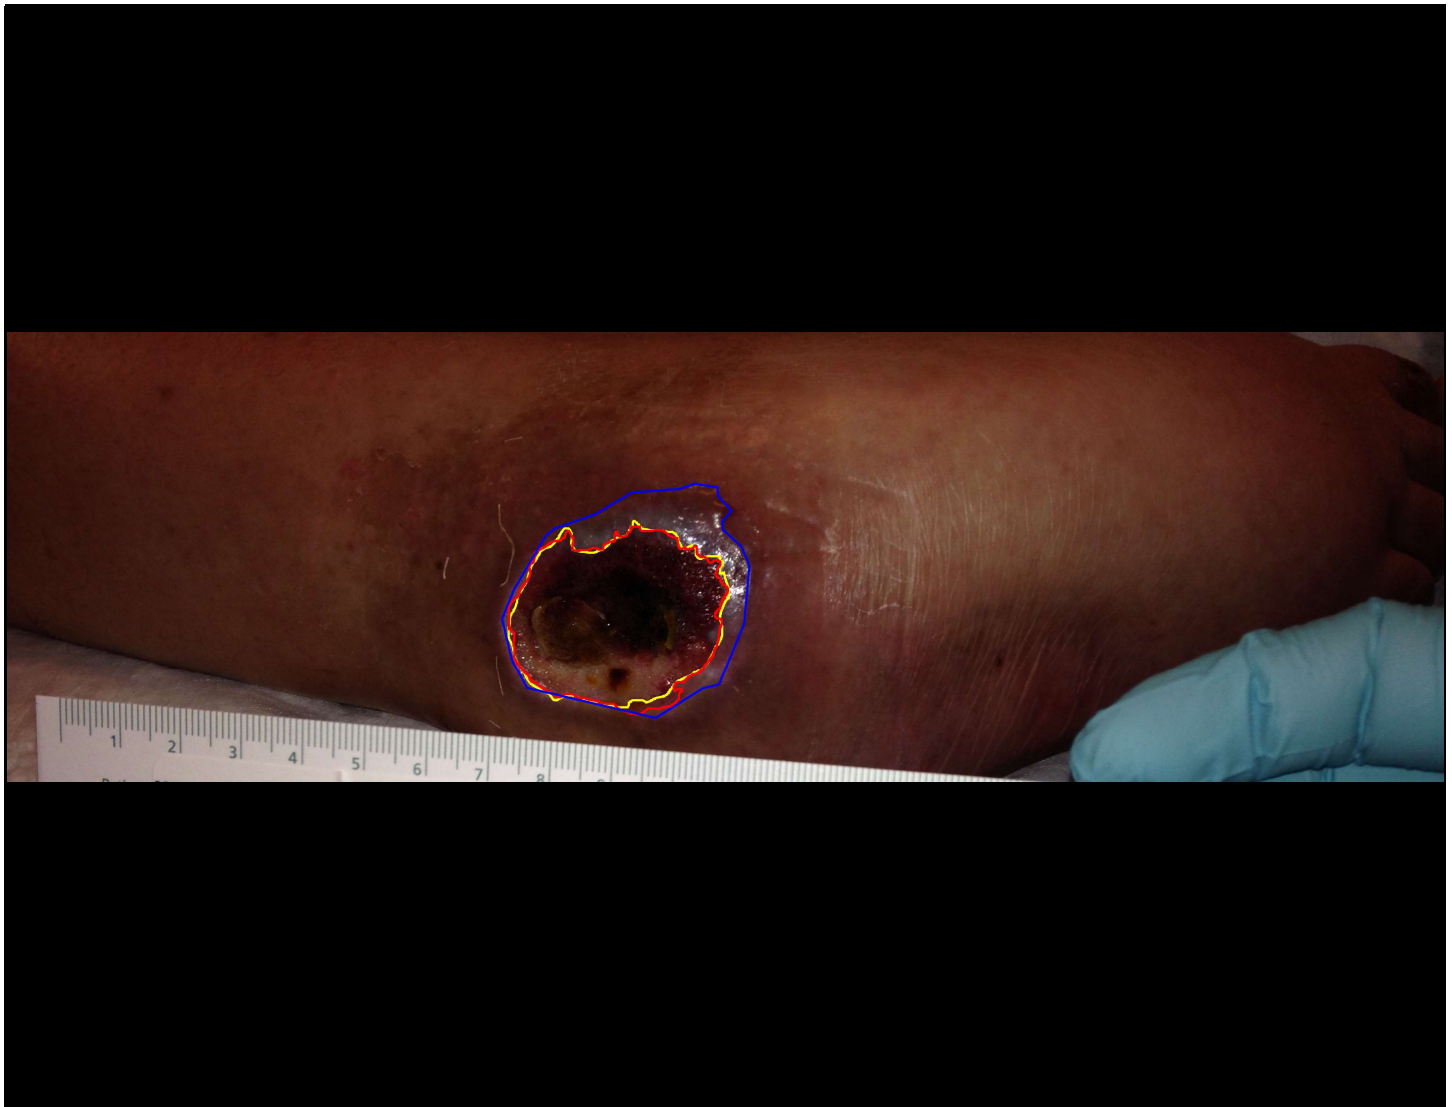

| Tracing Data |                               |                           |                               |
|--------------|-------------------------------|---------------------------|-------------------------------|
| Tracer:      | Wound Area (px <sup>2</sup> ) | Ruler Calibration (px/cm) | Wound Area (cm <sup>2</sup> ) |
| H1           | 154475                        | 139.5                     | 7.94                          |
| H2           | 155633                        | 140.5                     | 7.88                          |
| AI           | 219359                        | 139.9                     | 11.20                         |

| Tracing Comparisons     |                     |                     |                     |                     |
|-------------------------|---------------------|---------------------|---------------------|---------------------|
| Difference Metric:      | Human-Human         |                     | Human-AI            |                     |
|                         | H1(ref)<br>H2(test) | H2(ref)<br>H1(test) | H1(ref)<br>AI(test) | H2(ref)<br>AI(test) |
| False Negative Area (%) | 2.7                 | 3.4                 | 0.2                 | 0.1                 |
| False Positive Area (%) | 3.4                 | 2.7                 | 42.2                | 41.0                |
| Relative Error (%)      | 0.7                 | 0.7                 | 42.0                | 40.9                |

| Blinded Attending Surgeon Review |              |                      |                      |                      |              |                         |
|----------------------------------|--------------|----------------------|----------------------|----------------------|--------------|-------------------------|
| Reviewer                         | PGT Estimate | H1 meets definition? | H2 meets definition? | AI meets definition? | Which is AI? | Which is most accurate? |
| 1                                | 0            | Yes                  | Yes                  | No                   | AI           | AI                      |
| 2                                | 0            | No                   | No                   | Yes                  | H2           | H2                      |
| 3                                | 80           | Yes                  | Yes                  | No                   | H2           | H1                      |

| Wound EMR Information |        |     |            |                |                   |                  |                  |                               |
|-----------------------|--------|-----|------------|----------------|-------------------|------------------|------------------|-------------------------------|
| Sequential Number     | Gender | Age | Wound Type | Wound Location | Wound Length (cm) | Wound Width (cm) | Wound Depth (cm) | Wound Area (cm <sup>2</sup> ) |
| 81                    | F      | 93  | PU         | L buttock      | 1.1               | 1.3              | 0.8              | 1.43                          |

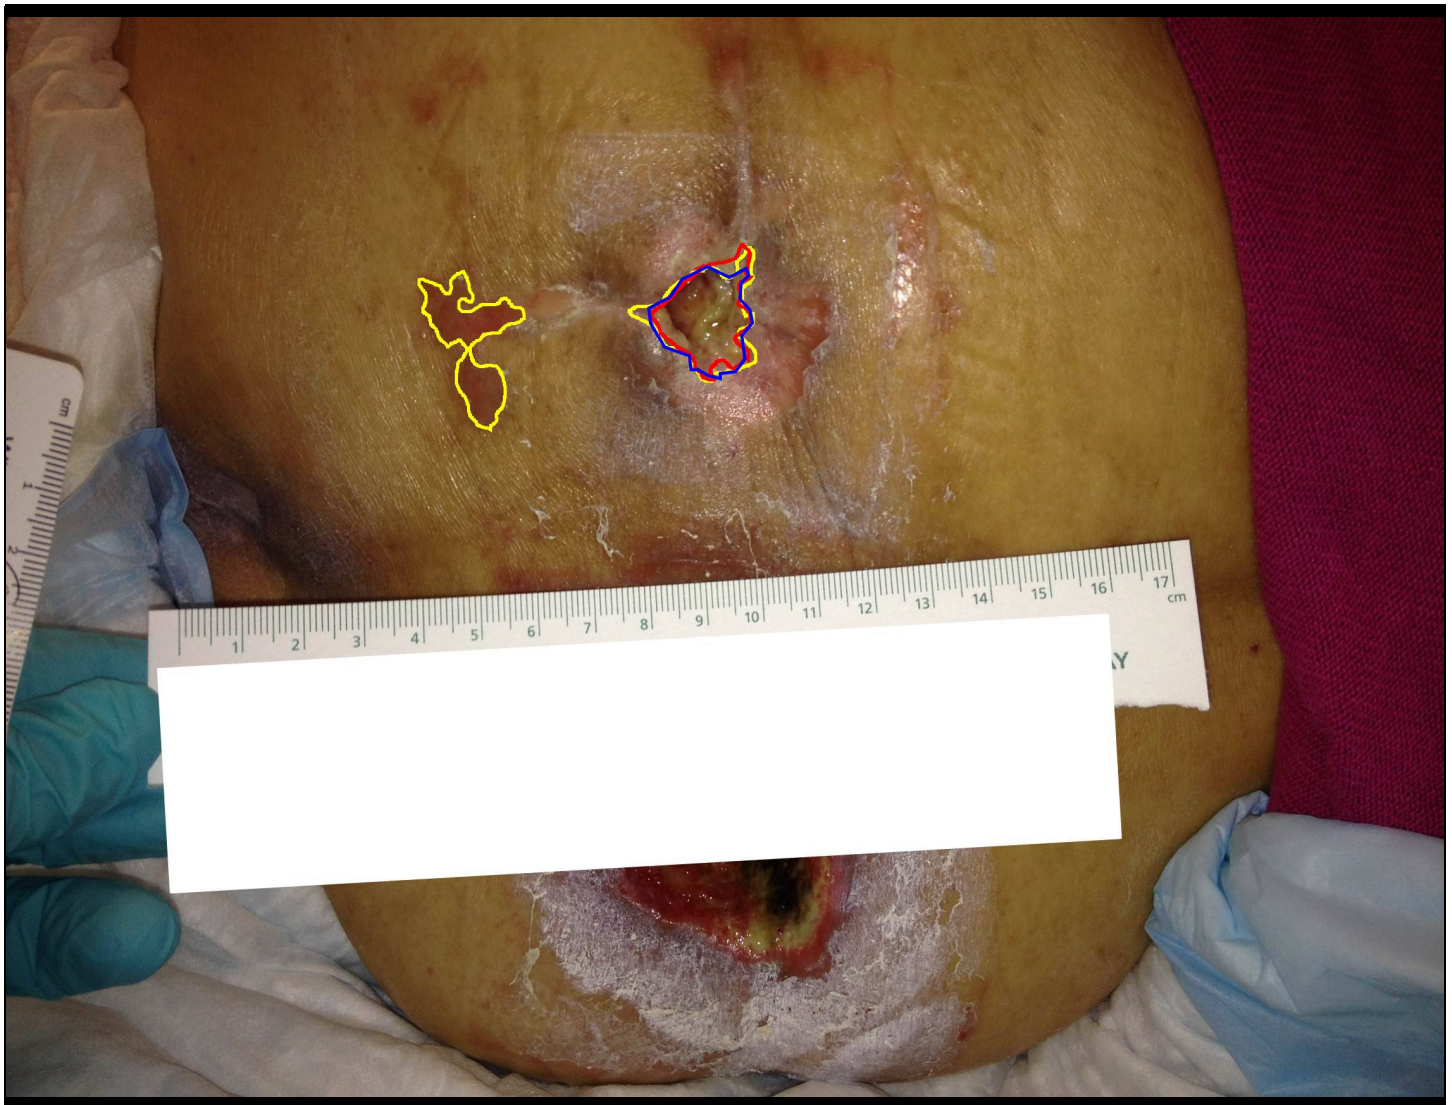

| Tracing Data |                               |                           |                               |
|--------------|-------------------------------|---------------------------|-------------------------------|
| Tracer:      | Wound Area (px <sup>2</sup> ) | Ruler Calibration (px/cm) | Wound Area (cm <sup>2</sup> ) |
| H1           | 36573                         | 88.3                      | 4.69                          |
| H2           | 18343                         | 88.2                      | 2.36                          |
| AI           | 18953                         | 88.9                      | 2.40                          |

| Tracing Comparisons     |                     |                     |                     |                     |
|-------------------------|---------------------|---------------------|---------------------|---------------------|
| Difference Metric:      | Human-Human         |                     | Human-AI            |                     |
|                         | H1(ref)<br>H2(test) | H2(ref)<br>H1(test) | H1(ref)<br>AI(test) | H2(ref)<br>AI(test) |
| False Negative Area (%) | 53.2                | 6.7                 | 50.3                | 9.3                 |
| False Positive Area (%) | 3.4                 | 106.1               | 2.1                 | 12.7                |
| Relative Error (%)      | 49.8                | 99.4                | 48.2                | 3.3                 |

| Blinded Attending Surgeon Review |              |                      |                      |                      |              |                         |
|----------------------------------|--------------|----------------------|----------------------|----------------------|--------------|-------------------------|
| Reviewer                         | PGT Estimate | H1 meets definition? | H2 meets definition? | AI meets definition? | Which is AI? | Which is most accurate? |
| 1                                | 0            | No                   | No                   | No                   | AI           | H2                      |
| 2                                | 0            | No                   | Yes                  | No                   | AI           | H2                      |
| 3                                | 0            | Yes                  | Yes                  | Yes                  | H1           | H2                      |

| Wound EMR Information |        |     |            |                |                   |                  |                  |                               |
|-----------------------|--------|-----|------------|----------------|-------------------|------------------|------------------|-------------------------------|
| Sequential Number     | Gender | Age | Wound Type | Wound Location | Wound Length (cm) | Wound Width (cm) | Wound Depth (cm) | Wound Area (cm <sup>2</sup> ) |
| 82                    | F      | 69  | Surgical   | chest          | 2.0               | 1.5              | 0.1              | 3.00                          |

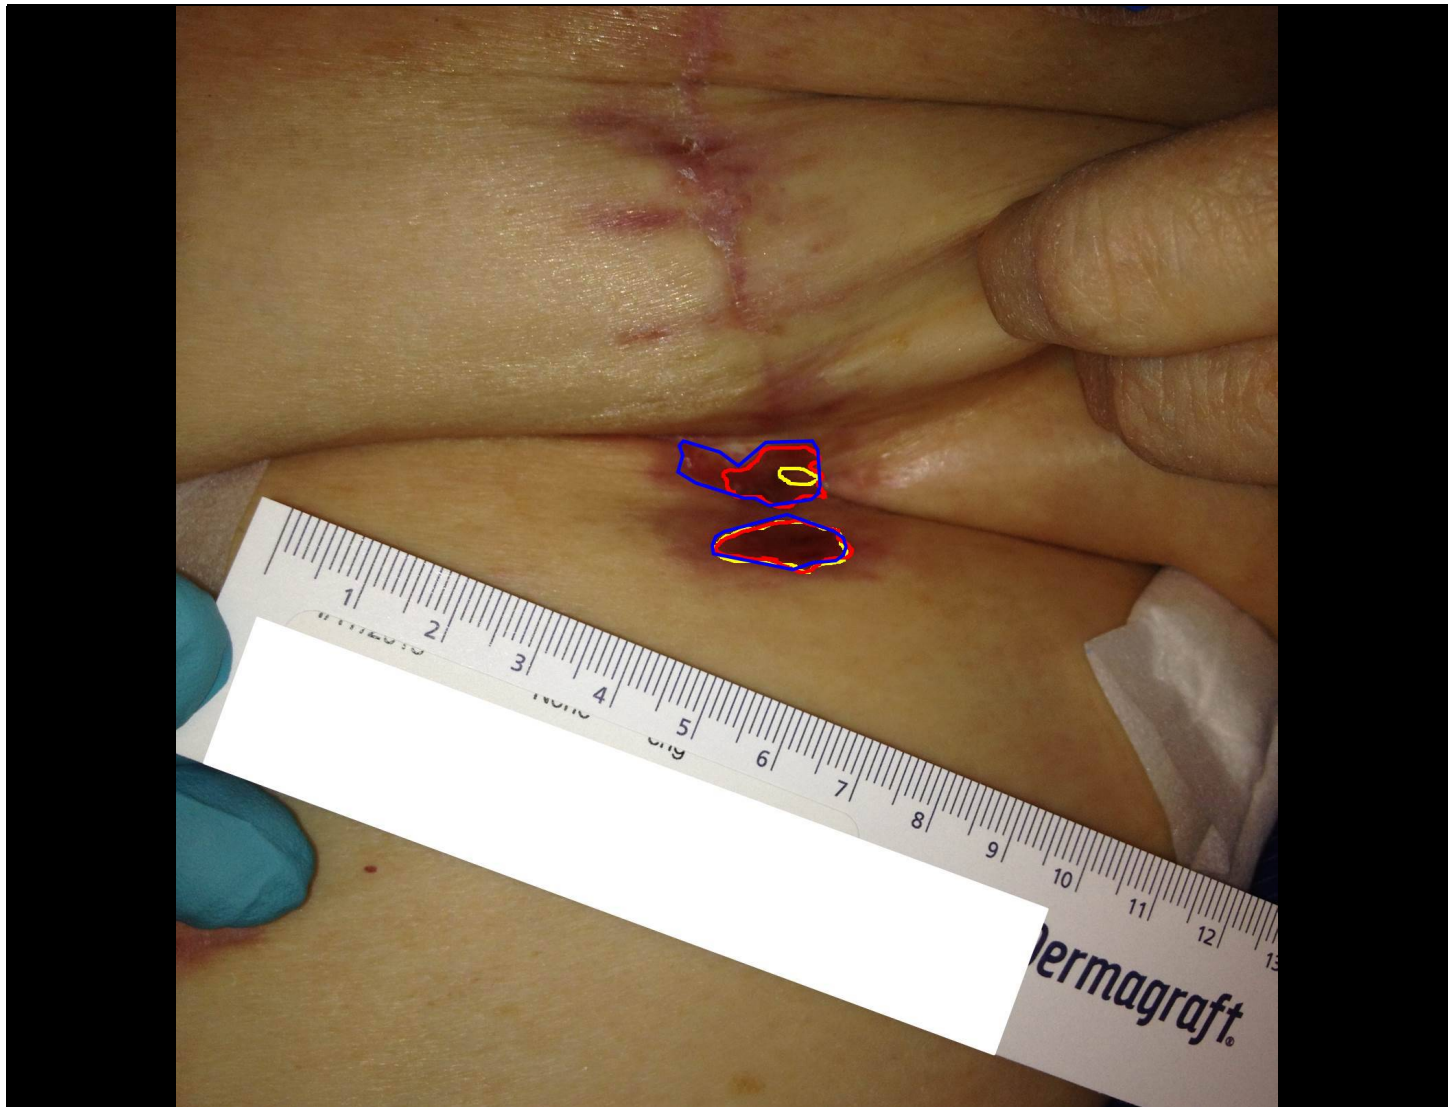

| Tracing Data |                               |                           |                               |
|--------------|-------------------------------|---------------------------|-------------------------------|
| Tracer:      | Wound Area (px <sup>2</sup> ) | Ruler Calibration (px/cm) | Wound Area (cm <sup>2</sup> ) |
| H1           | 10516                         | 128.2                     | 0.64                          |
| H2           | 17586                         | 125.3                     | 1.12                          |
| AI           | 24087                         | 136.1                     | 1.30                          |

| Tracing Comparisons     |                     |                     |                     |                     |
|-------------------------|---------------------|---------------------|---------------------|---------------------|
| Difference Metric:      | Human-Human         |                     | Human-AI            |                     |
|                         | H1(ref)<br>H2(test) | H2(ref)<br>H1(test) | H1(ref)<br>AI(test) | H2(ref)<br>AI(test) |
| False Negative Area (%) | 8.4                 | 45.2                | 5.3                 | 4.0                 |
| False Positive Area (%) | 75.6                | 5.0                 | 134.3               | 41.0                |
| Relative Error (%)      | 67.2                | 40.2                | 129.1               | 37.0                |

| Blinded Attending Surgeon Review |              |                      |                      |                      |              |                         |
|----------------------------------|--------------|----------------------|----------------------|----------------------|--------------|-------------------------|
| Reviewer                         | PGT Estimate | H1 meets definition? | H2 meets definition? | AI meets definition? | Which is AI? | Which is most accurate? |
| 1                                |              | No                   | No                   | No                   | H1           | None                    |
| 2                                | 0            | No                   | No                   | Yes                  | H2           | AI                      |
| 3                                | 30           | No                   | Yes                  | Yes                  | AI           | AI                      |

| Wound EMR Information |        |     |            |                |                   |                  |                  |                               |
|-----------------------|--------|-----|------------|----------------|-------------------|------------------|------------------|-------------------------------|
| Sequential Number     | Gender | Age | Wound Type | Wound Location | Wound Length (cm) | Wound Width (cm) | Wound Depth (cm) | Wound Area (cm <sup>2</sup> ) |
| 83                    | F      | 87  | PU         | R ankle        | 0.6               | 0.5              | 0.1              | 0.30                          |

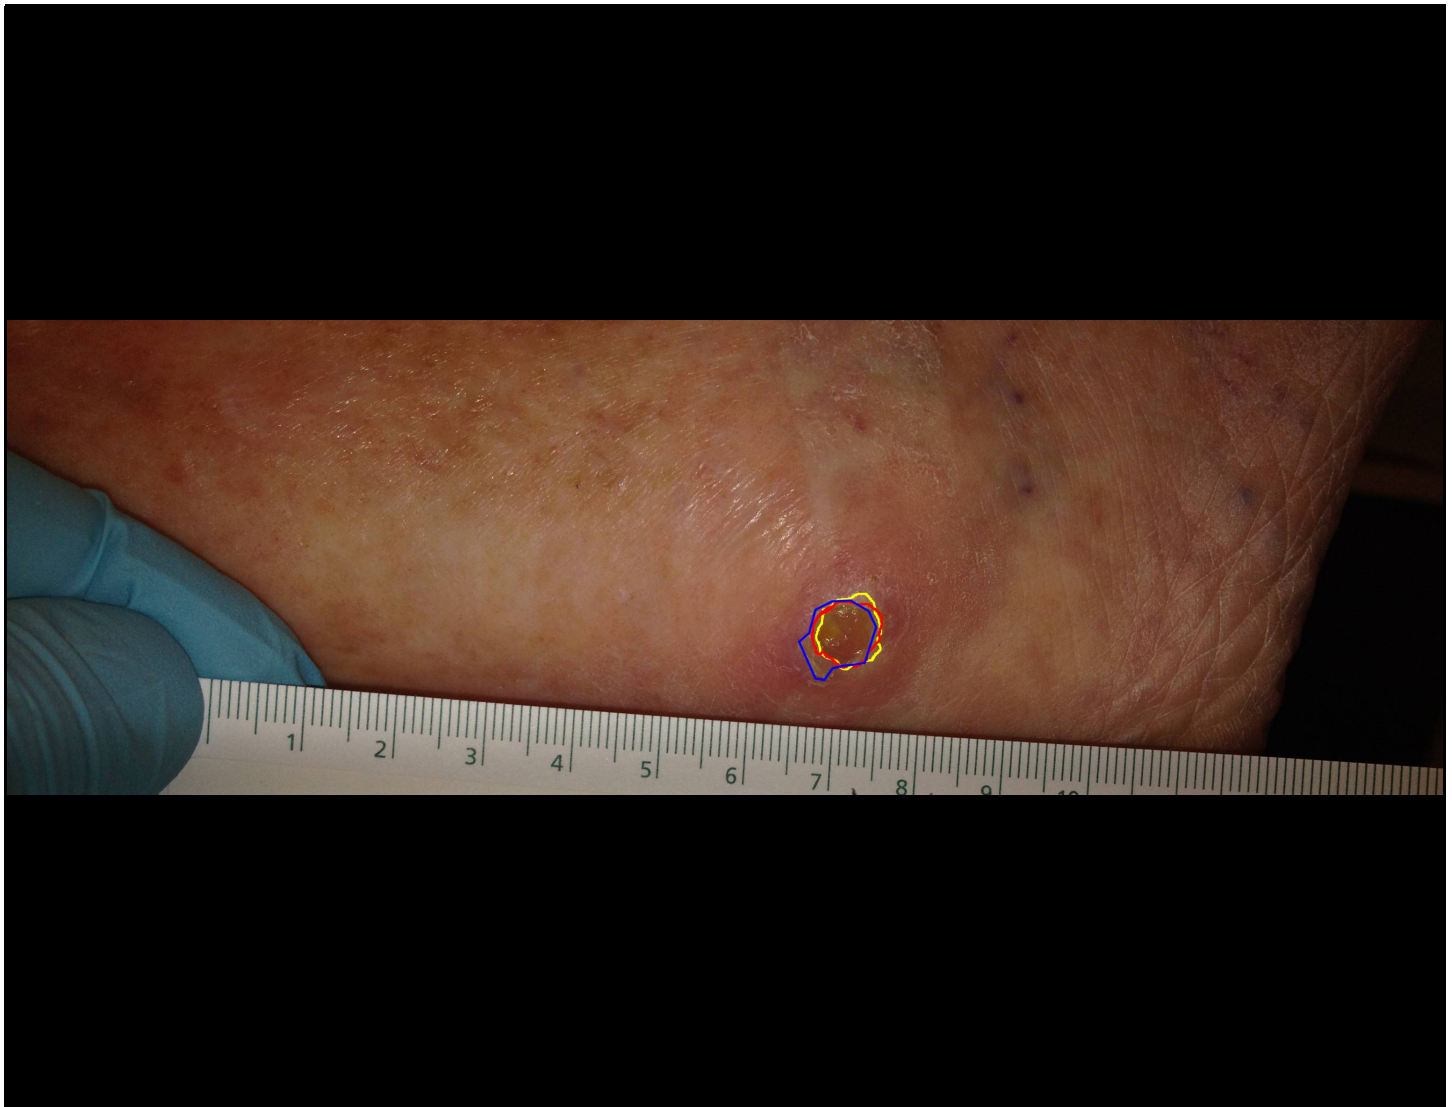

| Tracing Data |                               |                           |                               |
|--------------|-------------------------------|---------------------------|-------------------------------|
| Tracer:      | Wound Area (px <sup>2</sup> ) | Ruler Calibration (px/cm) | Wound Area (cm <sup>2</sup> ) |
| H1           | 18240                         | 194.9                     | 0.48                          |
| H2           | 17511                         | 194.5                     | 0.46                          |
| AI           | 20614                         | 203.0                     | 0.50                          |

| Tracing Comparisons     |                     |                     |                     |                     |
|-------------------------|---------------------|---------------------|---------------------|---------------------|
| Difference Metric:      | Human-Human         |                     | Human-AI            |                     |
|                         | H1(ref)<br>H2(test) | H2(ref)<br>H1(test) | H1(ref)<br>AI(test) | H2(ref)<br>AI(test) |
| False Negative Area (%) | 12.1                | 8.4                 | 18.5                | 10.5                |
| False Positive Area (%) | 8.1                 | 12.6                | 31.6                | 28.2                |
| Relative Error (%)      | 4.0                 | 4.2                 | 13.0                | 17.7                |

| Blinded Attending Surgeon Review |              |                      |                      |                      |              |                         |
|----------------------------------|--------------|----------------------|----------------------|----------------------|--------------|-------------------------|
| Reviewer                         | PGT Estimate | H1 meets definition? | H2 meets definition? | AI meets definition? | Which is AI? | Which is most accurate? |
| 1                                | 0            | No                   | Yes                  | Yes                  | H1           | H1                      |
| 2                                | 0            | No                   | Yes                  | No                   | AI           | H1                      |
| 3                                | 0            | Yes                  | Yes                  | No                   | AI           | H1                      |

| Wound EMR Information |        |     |            |                |                   |                  |                  |                               |
|-----------------------|--------|-----|------------|----------------|-------------------|------------------|------------------|-------------------------------|
| Sequential Number     | Gender | Age | Wound Type | Wound Location | Wound Length (cm) | Wound Width (cm) | Wound Depth (cm) | Wound Area (cm <sup>2</sup> ) |
| 84                    | F      | 87  | Trauma     | LLE ant        | 0.4               | 0.6              | 0.1              | 0.24                          |

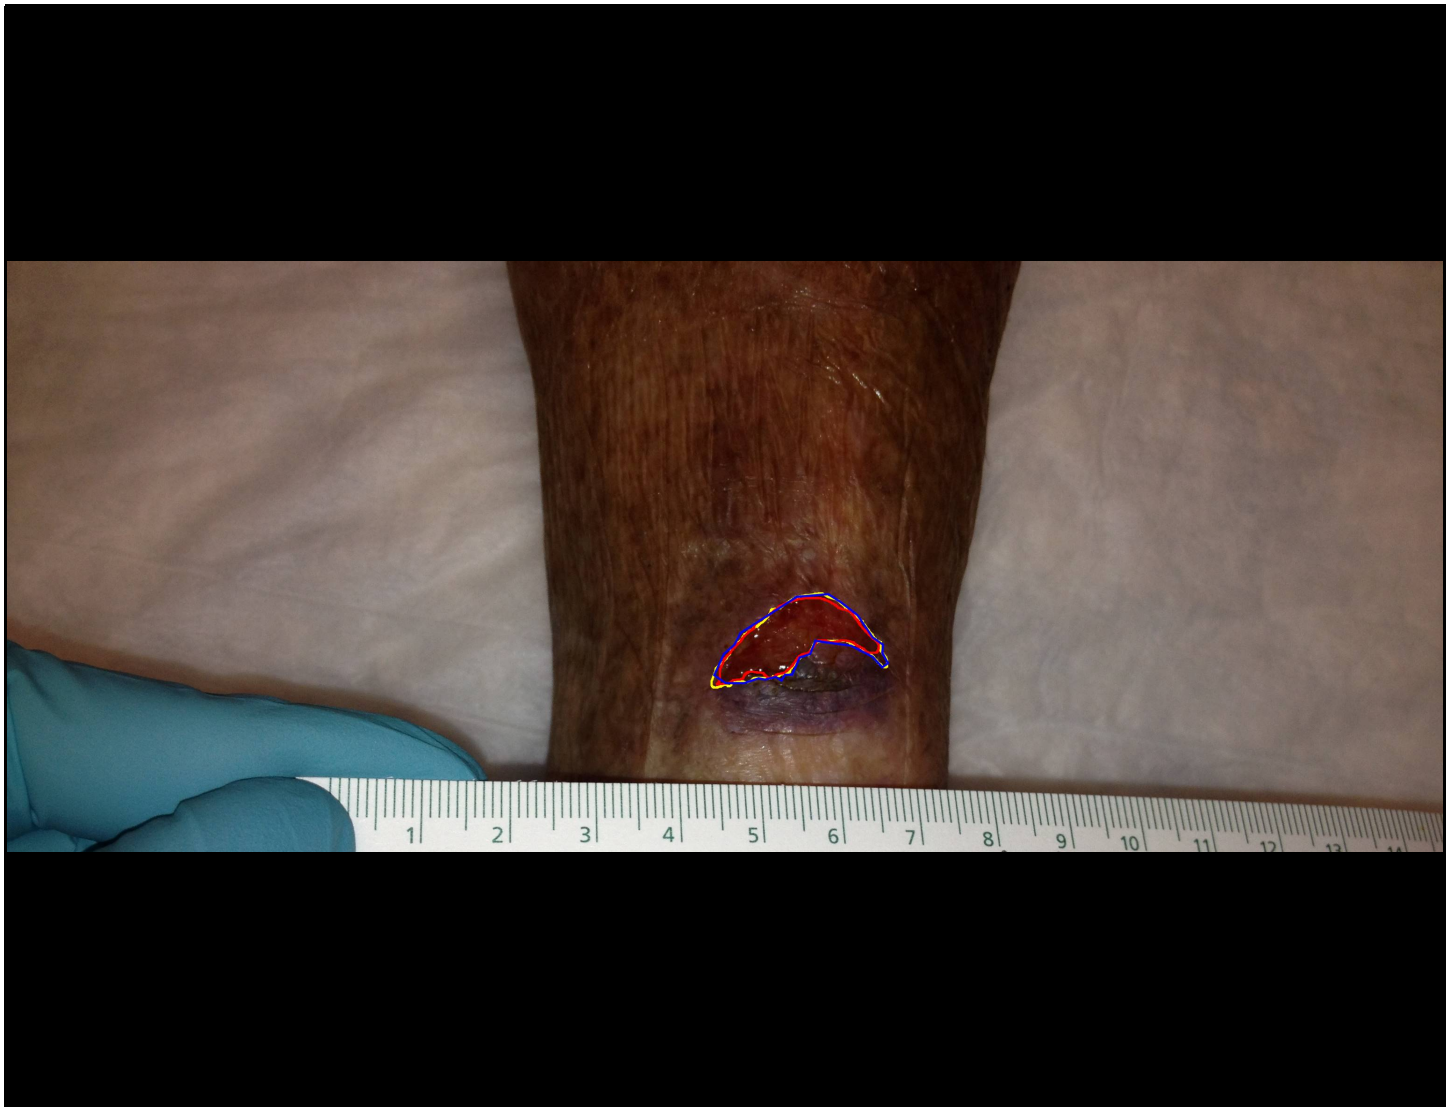

| Tracing Data |                               |                           |                               |
|--------------|-------------------------------|---------------------------|-------------------------------|
| Tracer:      | Wound Area (px <sup>2</sup> ) | Ruler Calibration (px/cm) | Wound Area (cm <sup>2</sup> ) |
| H1           | 38774                         | 181.3                     | 1.18                          |
| H2           | 34279                         | 180.7                     | 1.05                          |
| AI           | 40530                         | 201.3                     | 1.00                          |

| Tracing Comparisons     |                     |                     |                     |                     |
|-------------------------|---------------------|---------------------|---------------------|---------------------|
| Difference Metric:      | Human-Human         |                     | Human-AI            |                     |
|                         | H1(ref)<br>H2(test) | H2(ref)<br>H1(test) | H1(ref)<br>AI(test) | H2(ref)<br>AI(test) |
| False Negative Area (%) | 12.8                | 1.3                 | 2.9                 | 0.7                 |
| False Positive Area (%) | 1.2                 | 14.4                | 7.4                 | 18.9                |
| Relative Error (%)      | 11.6                | 13.1                | 4.5                 | 18.2                |

| Blinded Attending Surgeon Review |              |                      |                      |                      |              |                         |
|----------------------------------|--------------|----------------------|----------------------|----------------------|--------------|-------------------------|
| Reviewer                         | PGT Estimate | H1 meets definition? | H2 meets definition? | AI meets definition? | Which is AI? | Which is most accurate? |
| 1                                | 80           | Yes                  | Yes                  | Yes                  | AI           | H1                      |
| 2                                | 10           | Yes                  | Yes                  | Yes                  | AI           | H2                      |
| 3                                | 50           | Yes                  | Yes                  | Yes                  | H2           | AI                      |

| Wound EMR Information |        |     |            |                |                   |                  |                  |                               |
|-----------------------|--------|-----|------------|----------------|-------------------|------------------|------------------|-------------------------------|
| Sequential Number     | Gender | Age | Wound Type | Wound Location | Wound Length (cm) | Wound Width (cm) | Wound Depth (cm) | Wound Area (cm <sup>2</sup> ) |
| 85                    | M      | 43  | PU         | sacrum         | 2.1               | 0.9              | 1.5              | 1.89                          |

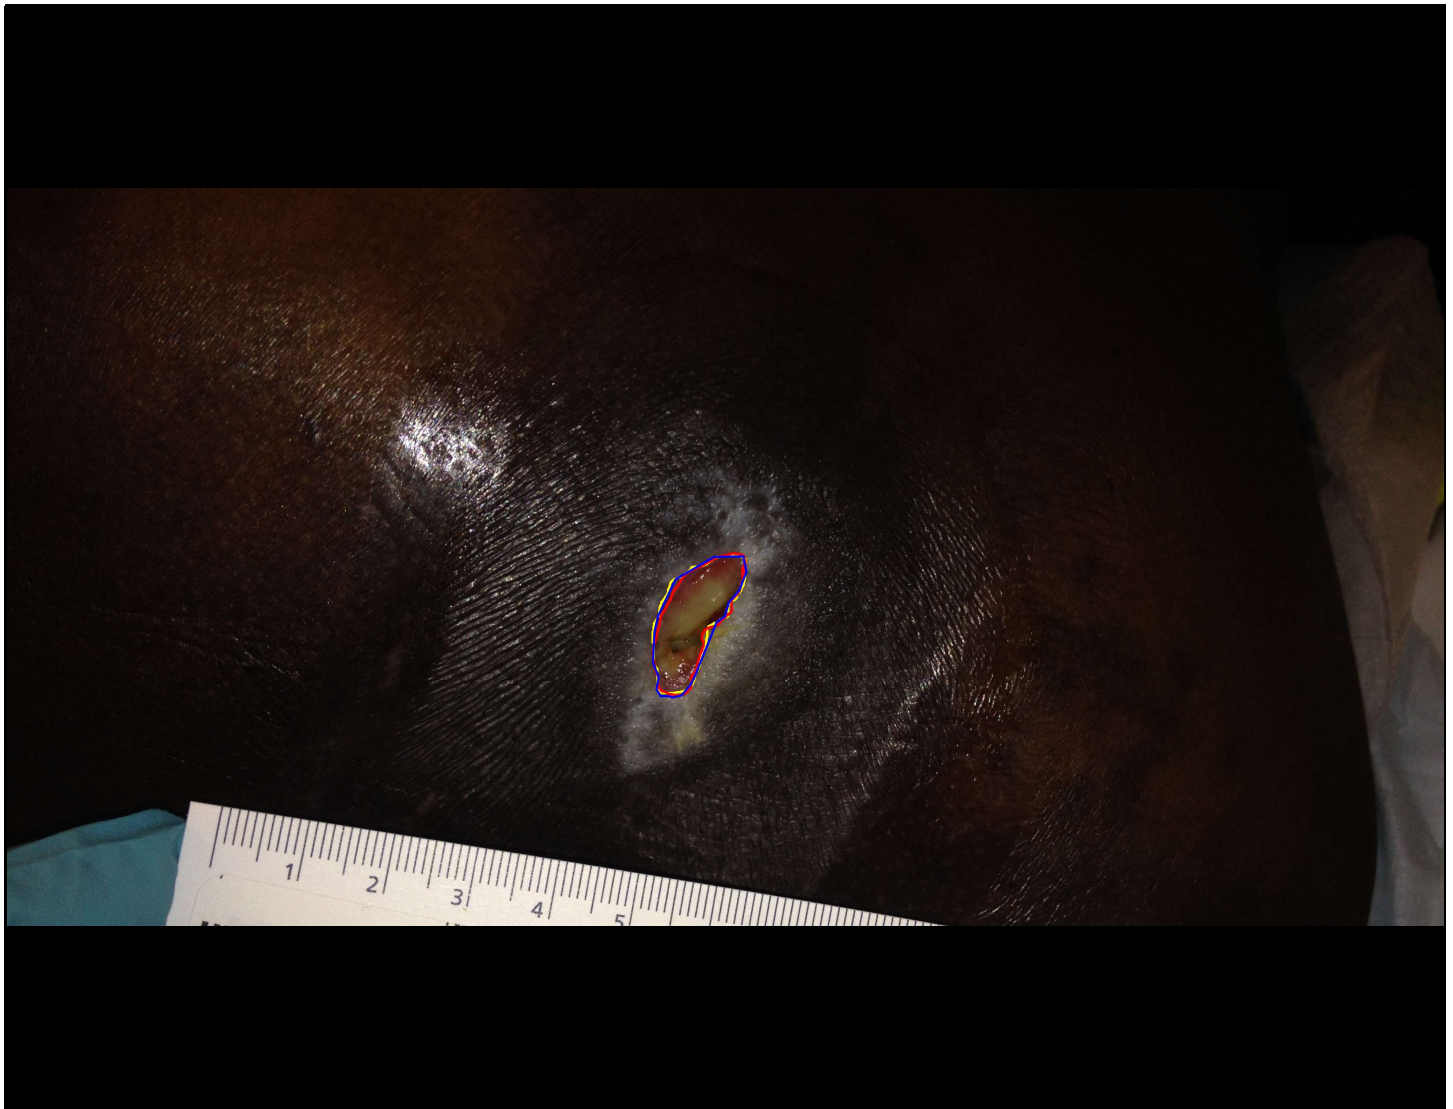

| Tracing Data |                               |                           |                               |
|--------------|-------------------------------|---------------------------|-------------------------------|
| Tracer:      | Wound Area (px <sup>2</sup> ) | Ruler Calibration (px/cm) | Wound Area (cm <sup>2</sup> ) |
| H1           | 37979                         | 193.0                     | 1.02                          |
| H2           | 35586                         | 184.4                     | 1.05                          |
| AI           | 38231                         | 195.5                     | 1.00                          |

| Tracing Comparisons     |                     |                     |                     |                     |
|-------------------------|---------------------|---------------------|---------------------|---------------------|
| Difference Metric:      | Human-Human         |                     | Human-AI            |                     |
|                         | H1(ref)<br>H2(test) | H2(ref)<br>H1(test) | H1(ref)<br>AI(test) | H2(ref)<br>AI(test) |
| False Negative Area (%) | 8.6                 | 2.5                 | 3.7                 | 2.3                 |
| False Positive Area (%) | 2.3                 | 9.2                 | 4.4                 | 9.8                 |
| Relative Error (%)      | 6.3                 | 6.7                 | 0.7                 | 7.4                 |

| Blinded Attending Surgeon Review |              |                      |                      |                      |              |                         |
|----------------------------------|--------------|----------------------|----------------------|----------------------|--------------|-------------------------|
| Reviewer                         | PGT Estimate | H1 meets definition? | H2 meets definition? | AI meets definition? | Which is AI? | Which is most accurate? |
| 1                                | 20           | Yes                  | Yes                  | Yes                  | AI           | H2                      |
| 2                                | <10          | No                   | Yes                  | No                   | AI           | H2                      |
| 3                                | 20           | Yes                  | Yes                  | Yes                  | H1           | H2                      |

| Wound EMR Information |        |     |            |                |                   |                  |                  |                               |
|-----------------------|--------|-----|------------|----------------|-------------------|------------------|------------------|-------------------------------|
| Sequential Number     | Gender | Age | Wound Type | Wound Location | Wound Length (cm) | Wound Width (cm) | Wound Depth (cm) | Wound Area (cm <sup>2</sup> ) |
| 86                    | M      | 63  | VLU        | LLE lat        | 7.8               | 11.4             | 0.2              | 88.92                         |

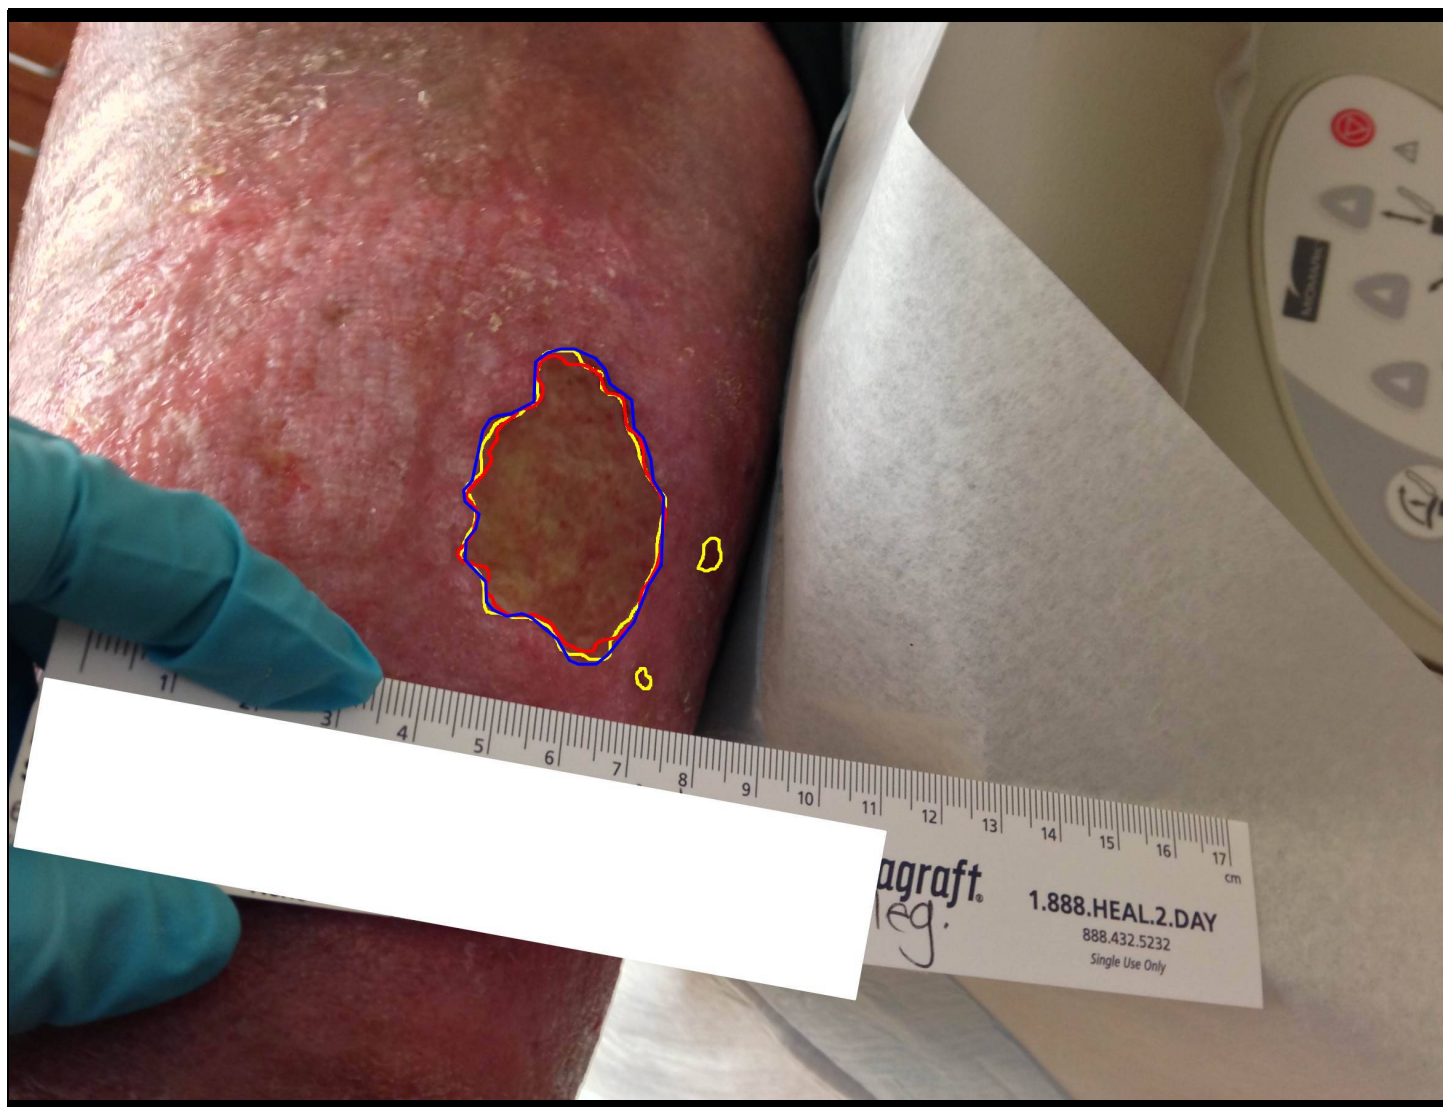

| Tracing Data |                               |                           |                               |
|--------------|-------------------------------|---------------------------|-------------------------------|
| Tracer:      | Wound Area (px <sup>2</sup> ) | Ruler Calibration (px/cm) | Wound Area (cm <sup>2</sup> ) |
| H1           | 110226                        | 116.7                     | 8.09                          |
| H2           | 104329                        | 114.8                     | 7.92                          |
| AI           | 114970                        | 117.0                     | 8.40                          |

| Tracing Comparisons     |                     |                     |                     |                     |
|-------------------------|---------------------|---------------------|---------------------|---------------------|
| Difference Metric:      | Human-Human         |                     | Human-AI            |                     |
|                         | H1(ref)<br>H2(test) | H2(ref)<br>H1(test) | H1(ref)<br>AI(test) | H2(ref)<br>AI(test) |
| False Negative Area (%) | 7.1                 | 1.8                 | 2.6                 | 0.4                 |
| False Positive Area (%) | 1.7                 | 7.5                 | 7.0                 | 10.6                |
| Relative Error (%)      | 5.3                 | 5.7                 | 4.3                 | 10.2                |

| Blinded Attending Surgeon Review |              |                      |                      |                      |              |                         |
|----------------------------------|--------------|----------------------|----------------------|----------------------|--------------|-------------------------|
| Reviewer                         | PGT Estimate | H1 meets definition? | H2 meets definition? | AI meets definition? | Which is AI? | Which is most accurate? |
| 1                                | 0            | No                   | Yes                  | Yes                  | AI           | H2                      |
| 2                                | 0            | Yes                  | No                   | No                   | AI           | AI                      |
| 3                                | 0            | Yes                  | Yes                  | Yes                  | H2           | H1                      |



| Wound EMR Information |        |     |            |                |                   |                  |                  |                               |
|-----------------------|--------|-----|------------|----------------|-------------------|------------------|------------------|-------------------------------|
| Sequential Number     | Gender | Age | Wound Type | Wound Location | Wound Length (cm) | Wound Width (cm) | Wound Depth (cm) | Wound Area (cm <sup>2</sup> ) |
| 87                    | F      | 66  | VLU        | LLE medial     | 2.5               | 1.1              | 0.1              | 2.75                          |

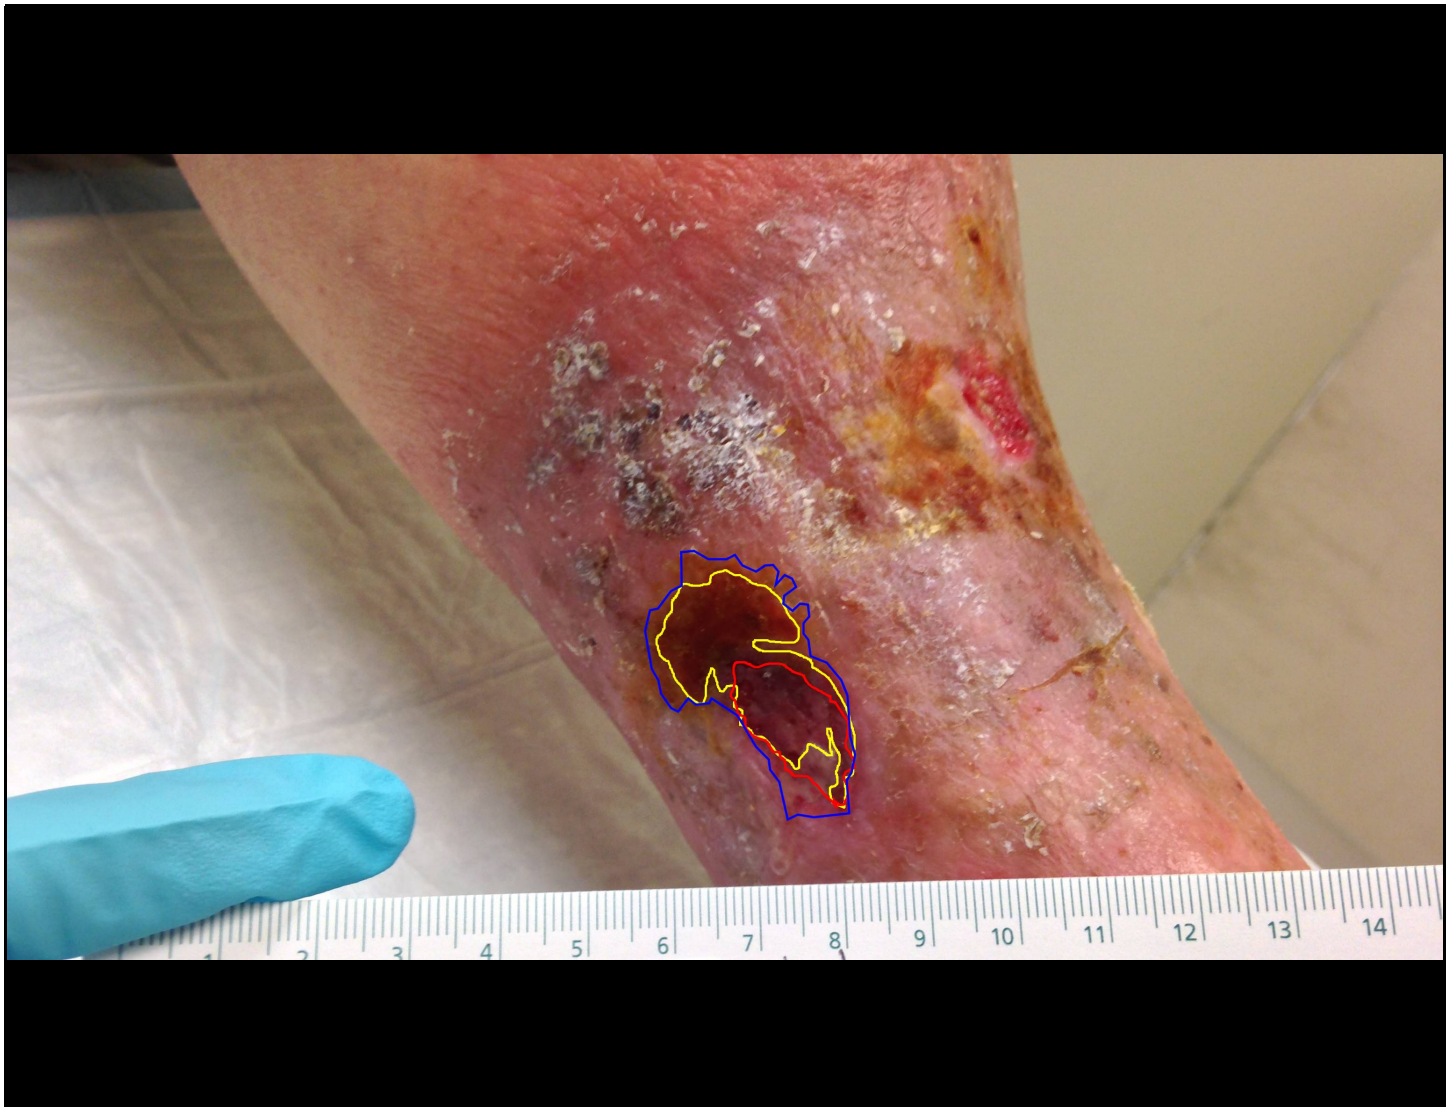

| Tracing Data |                               |                           |                               |
|--------------|-------------------------------|---------------------------|-------------------------------|
| Tracer:      | Wound Area (px <sup>2</sup> ) | Ruler Calibration (px/cm) | Wound Area (cm <sup>2</sup> ) |
| H1           | 107222                        | 194.6                     | 2.83                          |
| H2           | 51012                         | 194.0                     | 1.36                          |
| AI           | 161444                        | 203.5                     | 3.90                          |

| Tracing Comparisons     |                     |                     |                     |                     |
|-------------------------|---------------------|---------------------|---------------------|---------------------|
| Difference Metric:      | Human-Human         |                     | Human-AI            |                     |
|                         | H1(ref)<br>H2(test) | H2(ref)<br>H1(test) | H1(ref)<br>AI(test) | H2(ref)<br>AI(test) |
| False Negative Area (%) | 60.8                | 17.6                | 0.5                 | 0.2                 |
| False Positive Area (%) | 8.4                 | 127.8               | 51.0                | 216.7               |
| Relative Error (%)      | 52.4                | 110.2               | 50.6                | 216.5               |

| Blinded Attending Surgeon Review |              |                      |                      |                      |              |                         |
|----------------------------------|--------------|----------------------|----------------------|----------------------|--------------|-------------------------|
| Reviewer                         | PGT Estimate | H1 meets definition? | H2 meets definition? | AI meets definition? | Which is AI? | Which is most accurate? |
| 1                                | 0            | No                   | Yes                  | No                   | H2           | H2                      |
| 2                                | 0            | No                   | Yes                  | No                   | AI           | H2                      |
| 3                                | 30           | Yes                  | No                   | No                   | AI           | H1                      |

| Wound EMR Information |        |     |            |                |                   |                  |                  |                               |
|-----------------------|--------|-----|------------|----------------|-------------------|------------------|------------------|-------------------------------|
| Sequential Number     | Gender | Age | Wound Type | Wound Location | Wound Length (cm) | Wound Width (cm) | Wound Depth (cm) | Wound Area (cm <sup>2</sup> ) |
| 88                    | M      | 75  | Surgical   | R flank        | 0.3               | 2.5              | 0.4              | 0.75                          |

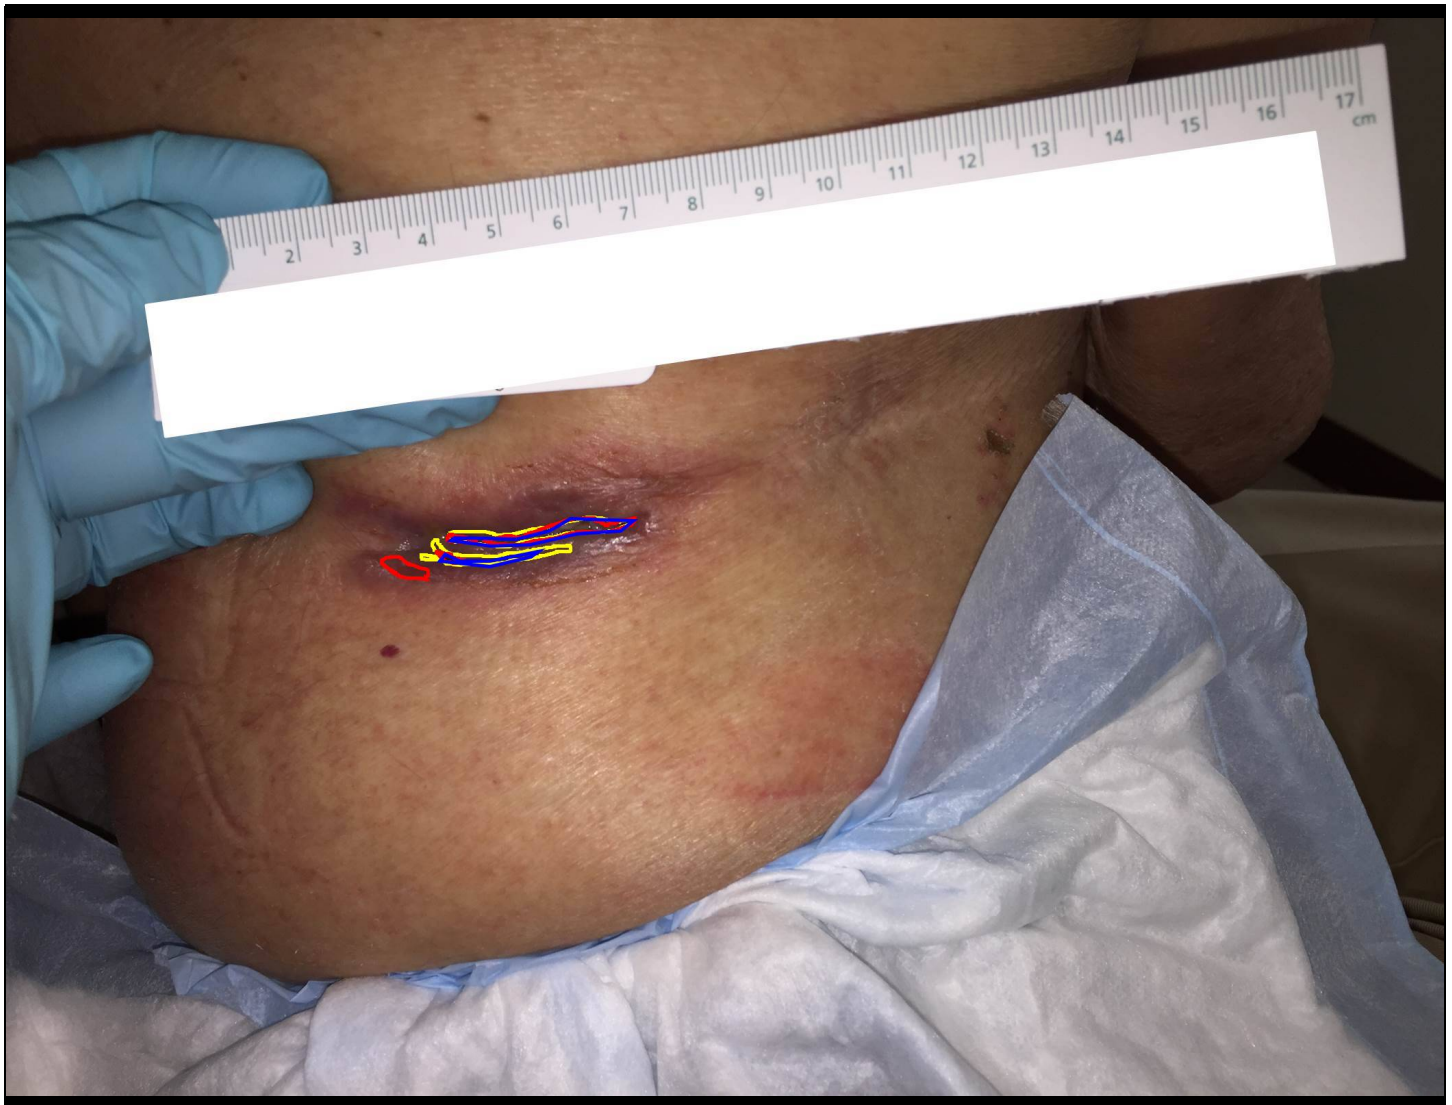

| Tracing Data |                               |                           |                               |
|--------------|-------------------------------|---------------------------|-------------------------------|
| Tracer:      | Wound Area (px <sup>2</sup> ) | Ruler Calibration (px/cm) | Wound Area (cm <sup>2</sup> ) |
| H1           | 6910                          | 99.4                      | 0.70                          |
| H2           | 4814                          | 98.9                      | 0.49                          |
| AI           | 4428                          | 105.2                     | 0.40                          |

| Tracing Comparisons     |                     |                     |                     |                     |
|-------------------------|---------------------|---------------------|---------------------|---------------------|
| Difference Metric:      | Human-Human         |                     | Human-AI            |                     |
|                         | H1(ref)<br>H2(test) | H2(ref)<br>H1(test) | H1(ref)<br>AI(test) | H2(ref)<br>AI(test) |
| False Negative Area (%) | 53.5                | 33.3                | 47.9                | 41.7                |
| False Positive Area (%) | 23.2                | 76.8                | 12.0                | 33.7                |
| Relative Error (%)      | 30.3                | 43.5                | 35.9                | 8.0                 |

| Blinded Attending Surgeon Review |              |                      |                      |                      |              |                         |
|----------------------------------|--------------|----------------------|----------------------|----------------------|--------------|-------------------------|
| Reviewer                         | PGT Estimate | H1 meets definition? | H2 meets definition? | AI meets definition? | Which is AI? | Which is most accurate? |
| 1                                | 0            | Yes                  | Yes                  | Yes                  | H2           | 0                       |
| 2                                | 0            | No                   | Yes                  | No                   | AI           | H2                      |
| 3                                | 0            | Yes                  | No                   | No                   | AI           | H1                      |

| Wound EMR Information |        |     |            |                |                   |                  |                  |                               |
|-----------------------|--------|-----|------------|----------------|-------------------|------------------|------------------|-------------------------------|
| Sequential Number     | Gender | Age | Wound Type | Wound Location | Wound Length (cm) | Wound Width (cm) | Wound Depth (cm) | Wound Area (cm <sup>2</sup> ) |
| 89                    | F      | 33  | VLU        | LLE lat        | 9.0               | 10.0             | 0.2              | 90.00                         |

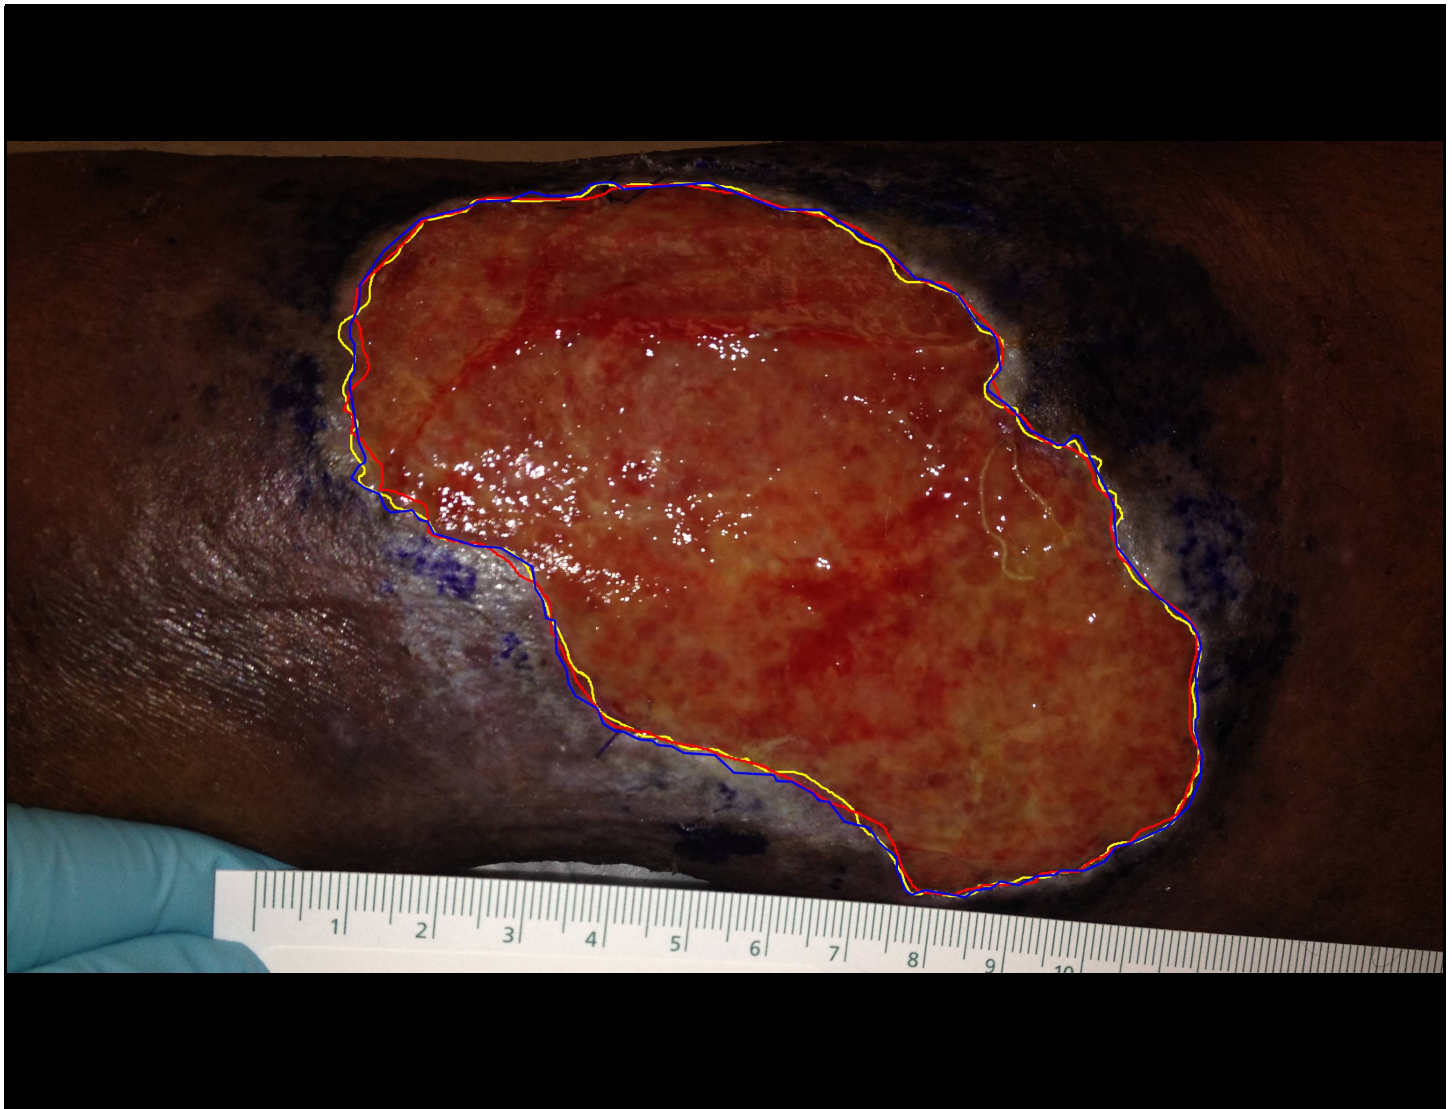

| Tracing Data |                               |                           |                               |
|--------------|-------------------------------|---------------------------|-------------------------------|
| Tracer:      | Wound Area (px <sup>2</sup> ) | Ruler Calibration (px/cm) | Wound Area (cm <sup>2</sup> ) |
| H1           | 1961554                       | 204.2                     | 47.06                         |
| H2           | 1955125                       | 189.4                     | 54.51                         |
| AI           | 1993179                       | 211.4                     | 44.60                         |

| Tracing Comparisons     |                     |                     |                     |                     |
|-------------------------|---------------------|---------------------|---------------------|---------------------|
| Difference Metric:      | Human-Human         |                     | Human-AI            |                     |
|                         | H1(ref)<br>H2(test) | H2(ref)<br>H1(test) | H1(ref)<br>AI(test) | H2(ref)<br>AI(test) |
| False Negative Area (%) | 1.7                 | 1.3                 | 0.5                 | 0.6                 |
| False Positive Area (%) | 1.3                 | 1.7                 | 2.1                 | 2.5                 |
| Relative Error (%)      | 0.3                 | 0.3                 | 1.6                 | 1.9                 |

| Blinded Attending Surgeon Review |              |                      |                      |                      |              |                         |
|----------------------------------|--------------|----------------------|----------------------|----------------------|--------------|-------------------------|
| Reviewer                         | PGT Estimate | H1 meets definition? | H2 meets definition? | AI meets definition? | Which is AI? | Which is most accurate? |
| 1                                | 0            | Yes                  | Yes                  | Yes                  | H1           | H2                      |
| 2                                | <10          | Yes                  | Yes                  | Yes                  | H2           | AI                      |
| 3                                | 100          | Yes                  | Yes                  | Yes                  | AI           | H1                      |

| Wound EMR Information |        |     |            |                |                   |                  |                  |                               |
|-----------------------|--------|-----|------------|----------------|-------------------|------------------|------------------|-------------------------------|
| Sequential Number     | Gender | Age | Wound Type | Wound Location | Wound Length (cm) | Wound Width (cm) | Wound Depth (cm) | Wound Area (cm <sup>2</sup> ) |
| 90                    | F      | 70  | VLU        | R foot dorsal  | 3.5               | 5.0              | 0.2              | 17.50                         |

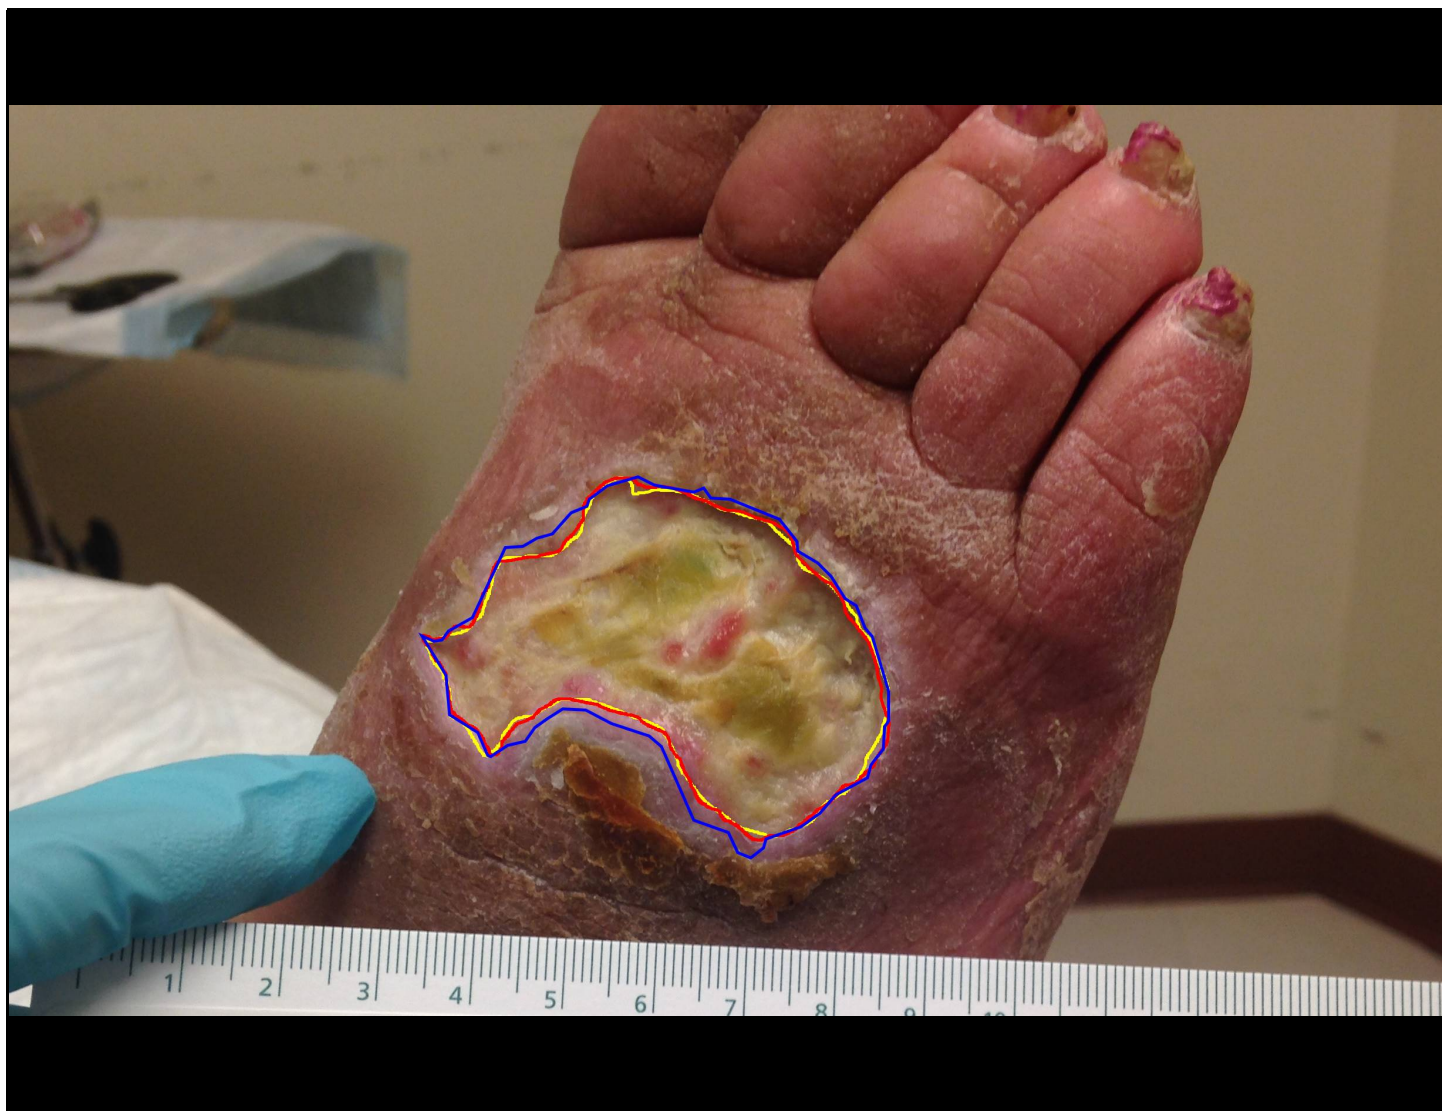

| Tracing Data |                               |                           |                               |
|--------------|-------------------------------|---------------------------|-------------------------------|
| Tracer:      | Wound Area (px <sup>2</sup> ) | Ruler Calibration (px/cm) | Wound Area (cm <sup>2</sup> ) |
| H1           | 272164                        | 155.1                     | 11.31                         |
| H2           | 275202                        | 157.3                     | 11.13                         |
| AI           | 297816                        | 164.5                     | 11.00                         |

| Tracing Comparisons     |                     |                     |                     |                     |
|-------------------------|---------------------|---------------------|---------------------|---------------------|
| Difference Metric:      | Human-Human         |                     | Human-AI            |                     |
|                         | H1(ref)<br>H2(test) | H2(ref)<br>H1(test) | H1(ref)<br>AI(test) | H2(ref)<br>AI(test) |
| False Negative Area (%) | 1.4                 | 2.5                 | 0.5                 | 0.4                 |
| False Positive Area (%) | 2.5                 | 1.4                 | 9.9                 | 8.7                 |
| Relative Error (%)      | 1.1                 | 1.1                 | 9.4                 | 8.2                 |

| Blinded Attending Surgeon Review |              |                      |                      |                      |              |                         |
|----------------------------------|--------------|----------------------|----------------------|----------------------|--------------|-------------------------|
| Reviewer                         | PGT Estimate | H1 meets definition? | H2 meets definition? | AI meets definition? | Which is AI? | Which is most accurate? |
| 1                                | <10          | Yes                  | Yes                  | Yes                  | H1           | H2                      |
| 2                                | <10          | Yes                  | No                   | Yes                  | AI           | H1                      |
| 3                                | 0            | No                   | No                   | No                   | AI           | H1                      |

| Wound EMR Information |        |     |            |                |                   |                  |                  |                               |
|-----------------------|--------|-----|------------|----------------|-------------------|------------------|------------------|-------------------------------|
| Sequential Number     | Gender | Age | Wound Type | Wound Location | Wound Length (cm) | Wound Width (cm) | Wound Depth (cm) | Wound Area (cm <sup>2</sup> ) |
| 91                    | M      | 80  | Trauma     | L forearm      | 2.0               | 2.0              | 0.1              | 4.00                          |

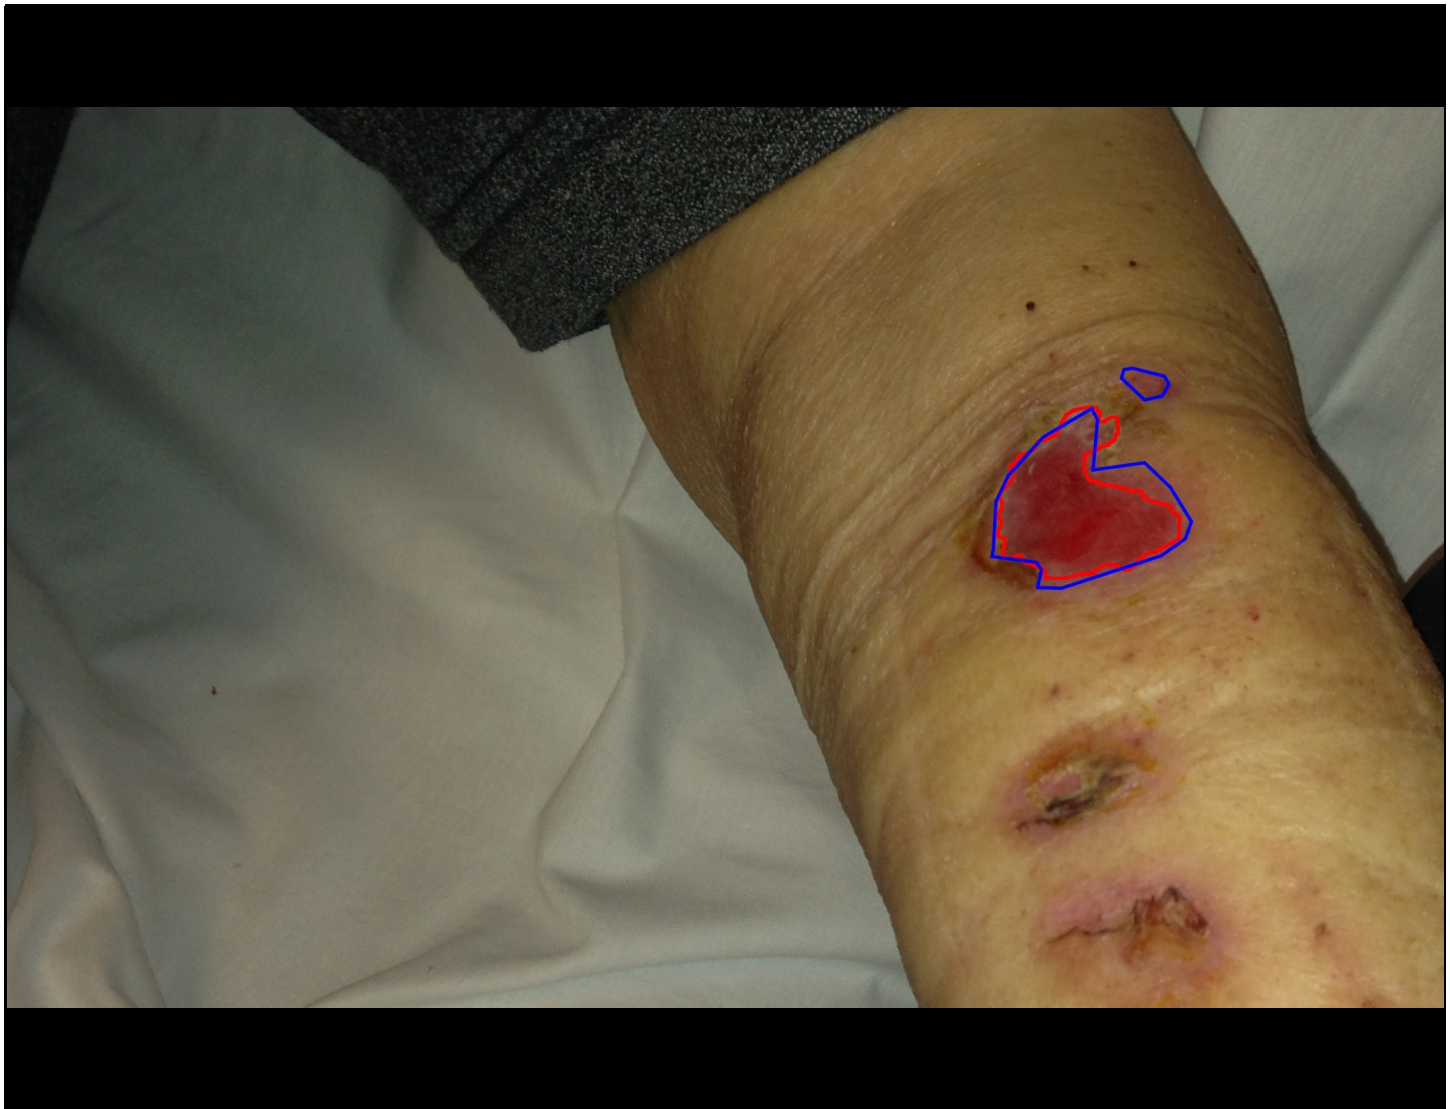

| Tracing Data |                               |                           |                               |
|--------------|-------------------------------|---------------------------|-------------------------------|
| Tracer:      | Wound Area (px <sup>2</sup> ) | Ruler Calibration (px/cm) | Wound Area (cm <sup>2</sup> ) |
| H1           | 23603                         | 163.8                     | 0.88                          |
| H2           | 41347                         | 145.6                     | 1.95                          |
| AI           | 50518                         | 151.5                     | 2.20                          |

| Tracing Comparisons     |                     |                     |                     |                     |
|-------------------------|---------------------|---------------------|---------------------|---------------------|
| Difference Metric:      | Human-Human         |                     | Human-AI            |                     |
|                         | H1(ref)<br>H2(test) | H2(ref)<br>H1(test) | H1(ref)<br>AI(test) | H2(ref)<br>AI(test) |
| False Negative Area (%) | 100.0               | 100.0               | 100.0               | 5.2                 |
| False Positive Area (%) | 175.2               | 57.1                | 214.0               | 27.4                |
| Relative Error (%)      | 75.2                | 42.9                | 114.0               | 22.2                |

| Blinded Attending Surgeon Review |              |                      |                      |                      |              |                         |
|----------------------------------|--------------|----------------------|----------------------|----------------------|--------------|-------------------------|
| Reviewer                         | PGT Estimate | H1 meets definition? | H2 meets definition? | AI meets definition? | Which is AI? | Which is most accurate? |
| 1                                | 0            | No                   | Yes                  | No                   | H1           | H1                      |
| 2                                | 100          | No                   | No                   | Yes                  | AI           | AI                      |
| 3                                | 80           | No                   | No                   | Yes                  | AI           | AI                      |

| Wound EMR Information |        |     |            |                |                   |                  |                  |                               |
|-----------------------|--------|-----|------------|----------------|-------------------|------------------|------------------|-------------------------------|
| Sequential Number     | Gender | Age | Wound Type | Wound Location | Wound Length (cm) | Wound Width (cm) | Wound Depth (cm) | Wound Area (cm <sup>2</sup> ) |
| 92                    | F      | 86  | VLU        | R ankle        | 0.6               | 0.5              | 0.2              | 0.30                          |

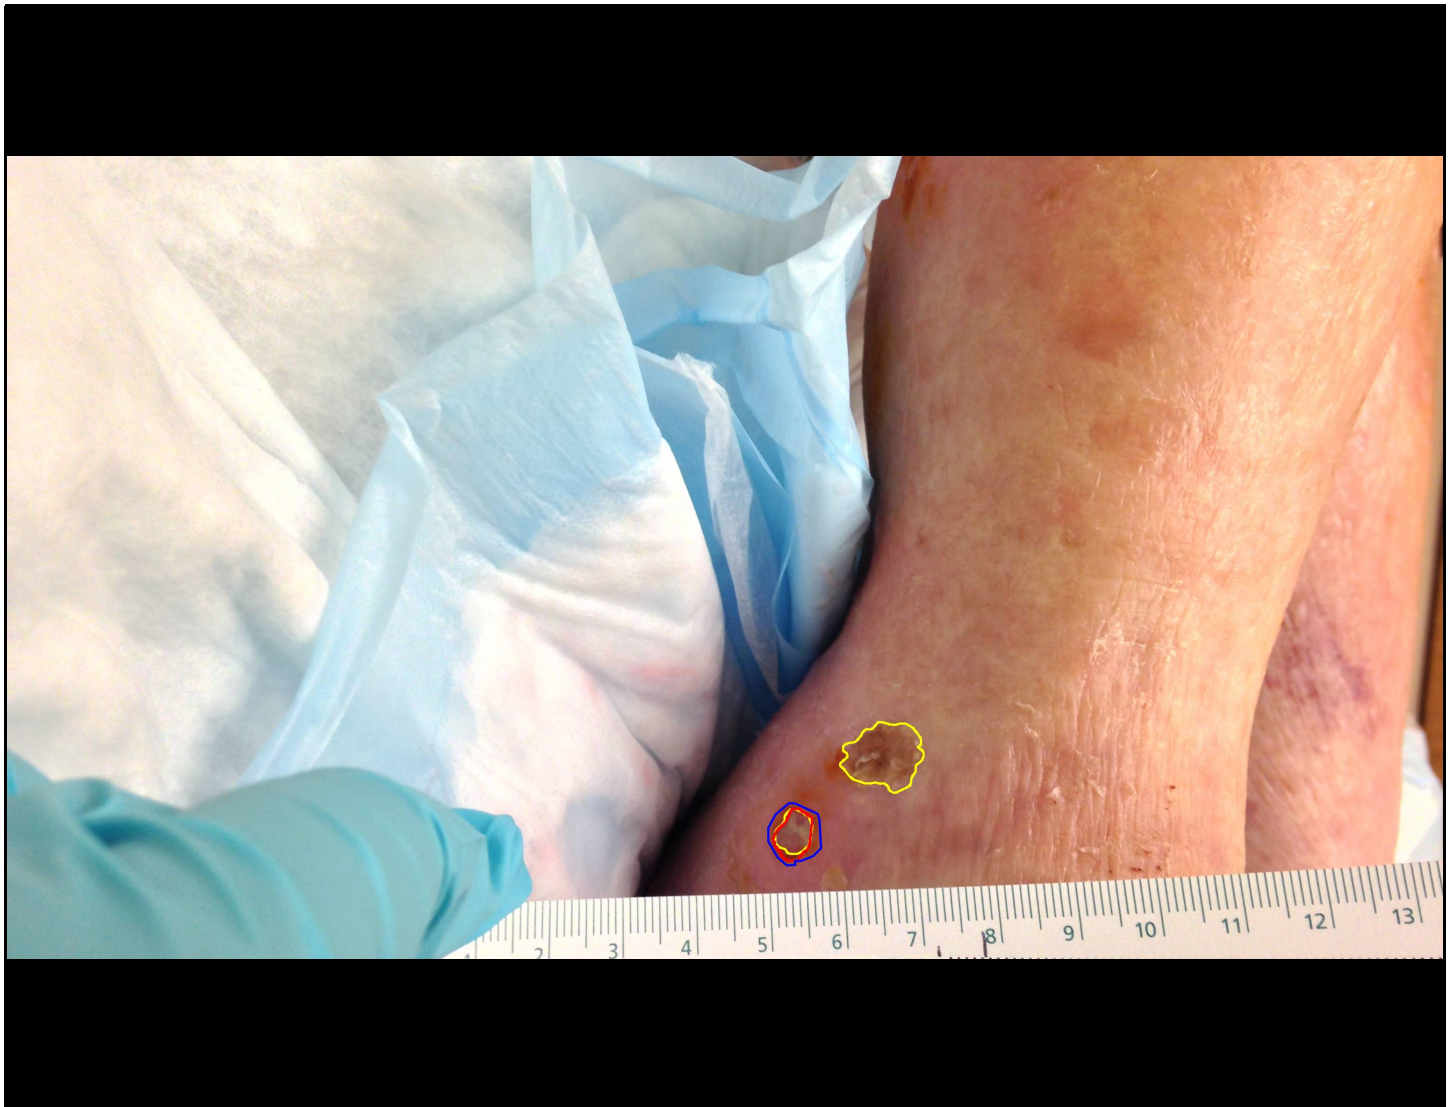

| Tracing Data |                               |                           |                               |
|--------------|-------------------------------|---------------------------|-------------------------------|
| Tracer:      | Wound Area (px <sup>2</sup> ) | Ruler Calibration (px/cm) | Wound Area (cm <sup>2</sup> ) |
| H1           | 27091                         | 169.8                     | 0.94                          |
| H2           | 7108                          | 169.0                     | 0.25                          |
| AI           | 12814                         | 179.0                     | 0.40                          |

| Tracing Comparisons     |                     |                     |                     |                     |
|-------------------------|---------------------|---------------------|---------------------|---------------------|
| Difference Metric:      | Human-Human         |                     | Human-AI            |                     |
|                         | H1(ref)<br>H2(test) | H2(ref)<br>H1(test) | H1(ref)<br>AI(test) | H2(ref)<br>AI(test) |
| False Negative Area (%) | 78.0                | 16.2                | 77.0                | 0.0                 |
| False Positive Area (%) | 4.2                 | 297.3               | 24.3                | 80.3                |
| Relative Error (%)      | 73.8                | 281.1               | 52.7                | 80.3                |

| Blinded Attending Surgeon Review |              |                      |                      |                      |              |                         |
|----------------------------------|--------------|----------------------|----------------------|----------------------|--------------|-------------------------|
| Reviewer                         | PGT Estimate | H1 meets definition? | H2 meets definition? | AI meets definition? | Which is AI? | Which is most accurate? |
| 1                                | 0            | No                   | Yes                  | No                   | H2           | AI                      |
| 2                                | 0            | No                   | Yes                  | No                   | H2           | AI                      |
| 3                                | 10           | Yes                  | No                   | No                   | H1           | H2                      |

| Wound EMR Information |        |     |            |                |                   |                  |                  |                               |
|-----------------------|--------|-----|------------|----------------|-------------------|------------------|------------------|-------------------------------|
| Sequential Number     | Gender | Age | Wound Type | Wound Location | Wound Length (cm) | Wound Width (cm) | Wound Depth (cm) | Wound Area (cm <sup>2</sup> ) |
| 93                    | M      | 54  | Surgical   | RLE lat        | 8.5               | 4.0              | 0.2              | 34.00                         |

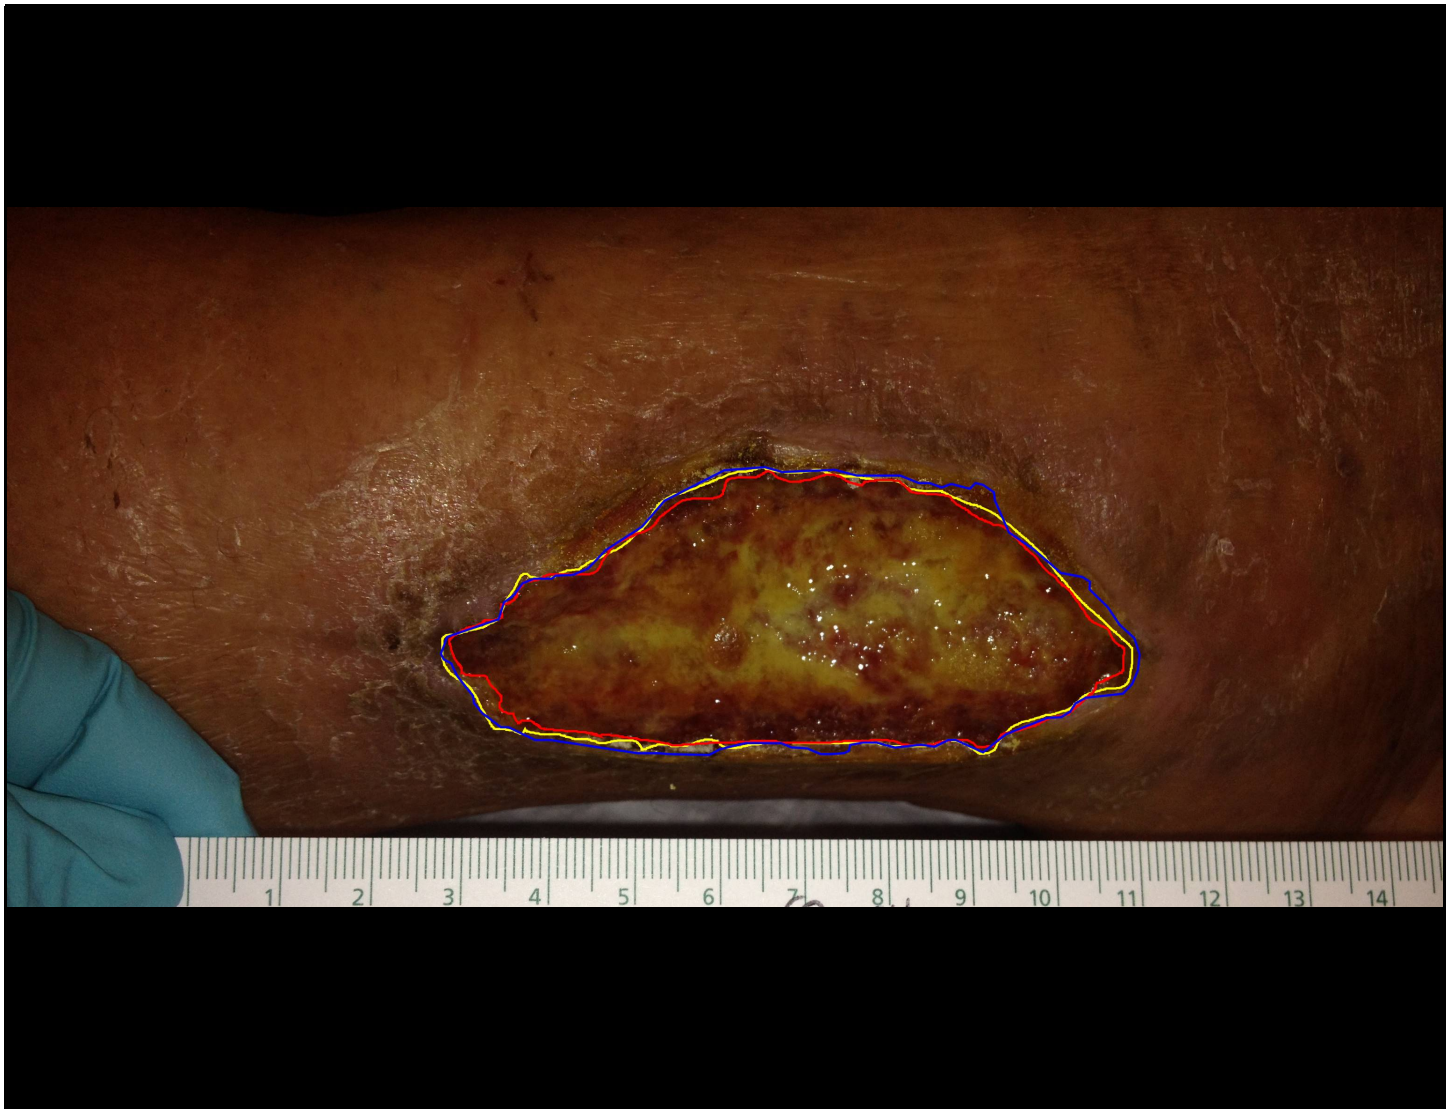

| Tracing Data |                               |                           |                               |
|--------------|-------------------------------|---------------------------|-------------------------------|
| Tracer:      | Wound Area (px <sup>2</sup> ) | Ruler Calibration (px/cm) | Wound Area (cm <sup>2</sup> ) |
| H1           | 707044                        | 196.0                     | 18.40                         |
| H2           | 669969                        | 190.0                     | 18.56                         |
| AI           | 735133                        | 197.7                     | 18.80                         |

| Tracing Comparisons     |                     |                     |                     |                     |
|-------------------------|---------------------|---------------------|---------------------|---------------------|
| Difference Metric:      | Human-Human         |                     | Human-AI            |                     |
|                         | H1(ref)<br>H2(test) | H2(ref)<br>H1(test) | H1(ref)<br>AI(test) | H2(ref)<br>AI(test) |
| False Negative Area (%) | 5.8                 | 0.6                 | 0.7                 | 0.2                 |
| False Positive Area (%) | 0.6                 | 6.2                 | 4.7                 | 10.0                |
| Relative Error (%)      | 5.2                 | 5.5                 | 4.0                 | 9.7                 |

| Blinded Attending Surgeon Review |              |                      |                      |                      |              |                         |
|----------------------------------|--------------|----------------------|----------------------|----------------------|--------------|-------------------------|
| Reviewer                         | PGT Estimate | H1 meets definition? | H2 meets definition? | AI meets definition? | Which is AI? | Which is most accurate? |
| 1                                | 0            | No                   | Yes                  | Yes                  | AI           | AI                      |
| 2                                | 0            | Yes                  | Yes                  | No                   | AI           | H1                      |
| 3                                | 40           | Yes                  | Yes                  | Yes                  | H1           | AI                      |

| Wound EMR Information |        |     |            |                |                   |                  |                  |                               |
|-----------------------|--------|-----|------------|----------------|-------------------|------------------|------------------|-------------------------------|
| Sequential Number     | Gender | Age | Wound Type | Wound Location | Wound Length (cm) | Wound Width (cm) | Wound Depth (cm) | Wound Area (cm <sup>2</sup> ) |
| 94                    | M      | 76  | VLU        | RLE med        | 5.7               | 3.7              | 0.1              | 21.09                         |

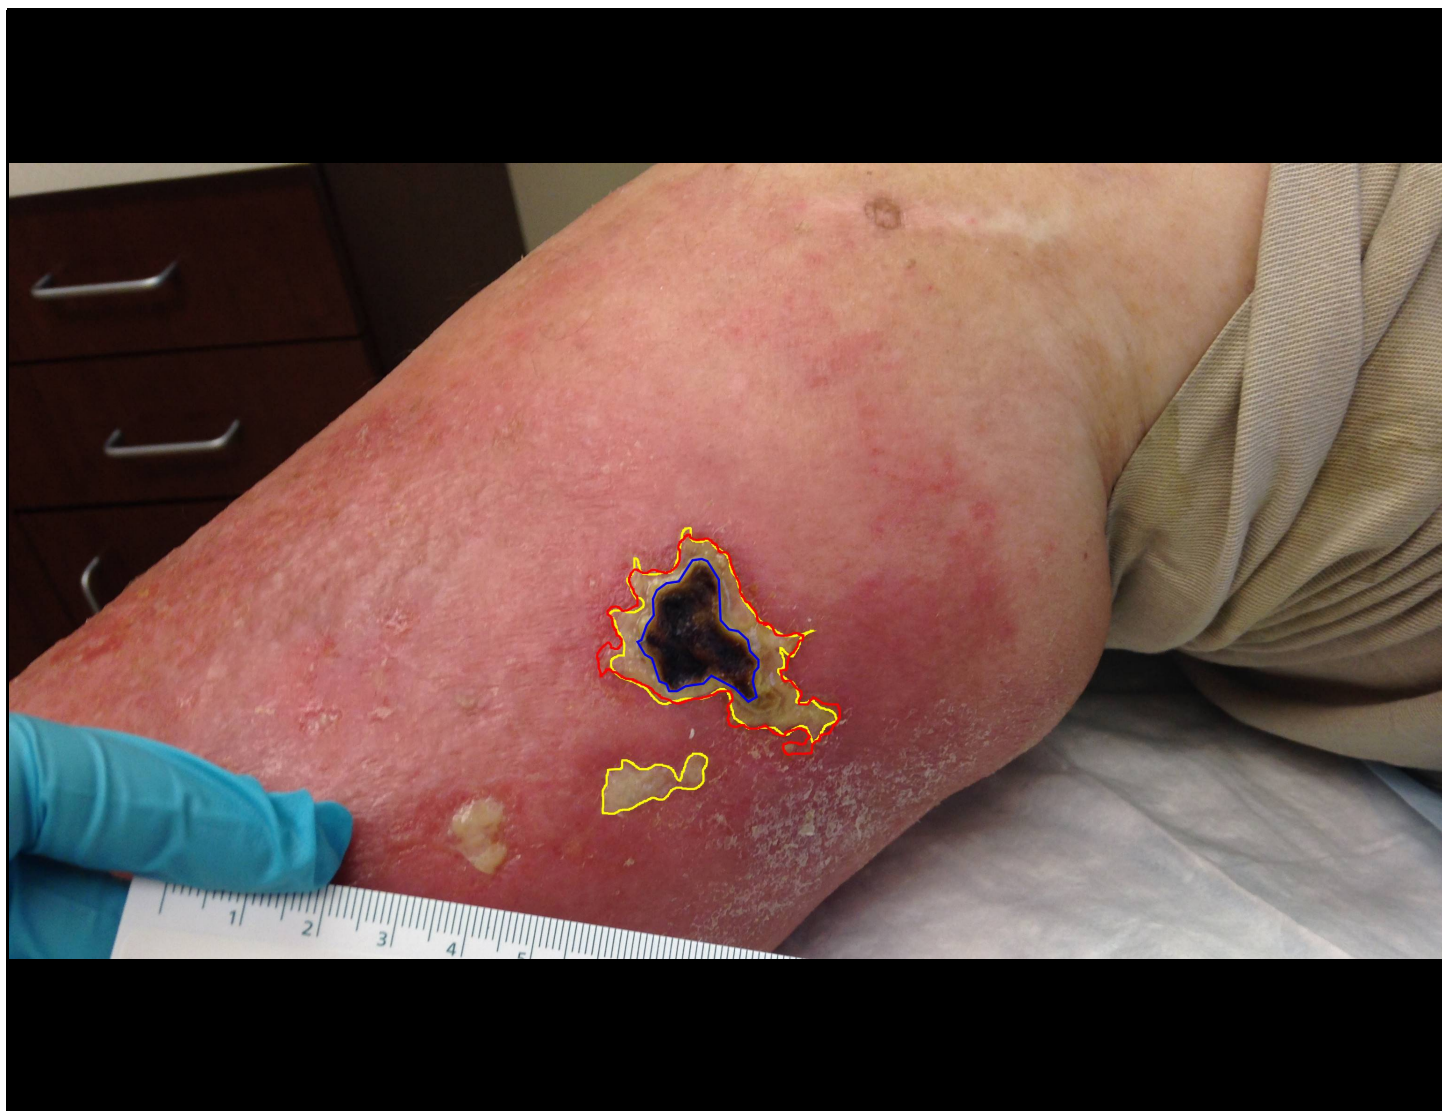

| Tracing Data |                               |                           |                               |
|--------------|-------------------------------|---------------------------|-------------------------------|
| Tracer:      | Wound Area (px <sup>2</sup> ) | Ruler Calibration (px/cm) | Wound Area (cm <sup>2</sup> ) |
| H1           | 133664                        | 160.5                     | 5.19                          |
| H2           | 124146                        | 146.8                     | 5.76                          |
| AI           | 49808                         | 166.3                     | 1.80                          |

| Tracing Comparisons     |                     |                     |                     |                     |
|-------------------------|---------------------|---------------------|---------------------|---------------------|
| Difference Metric:      | Human-Human         |                     | Human-AI            |                     |
|                         | H1(ref)<br>H2(test) | H2(ref)<br>H1(test) | H1(ref)<br>AI(test) | H2(ref)<br>AI(test) |
| False Negative Area (%) | 14.9                | 8.3                 | 62.7                | 59.9                |
| False Positive Area (%) | 7.7                 | 16.0                | 0.0                 | 0.0                 |
| Relative Error (%)      | 7.1                 | 7.7                 | 62.7                | 59.9                |

| Blinded Attending Surgeon Review |              |                      |                      |                      |              |                         |
|----------------------------------|--------------|----------------------|----------------------|----------------------|--------------|-------------------------|
| Reviewer                         | PGT Estimate | H1 meets definition? | H2 meets definition? | AI meets definition? | Which is AI? | Which is most accurate? |
| 1                                | 0            | No                   | No                   | No                   | H1           | H2                      |
| 2                                | 0            | No                   | No                   | No                   | H1           | AI                      |
| 3                                | 0            | No                   | No                   | Yes                  | AI           | AI                      |



| Wound EMR Information |        |     |            |                |                   |                  |                  |                               |
|-----------------------|--------|-----|------------|----------------|-------------------|------------------|------------------|-------------------------------|
| Sequential Number     | Gender | Age | Wound Type | Wound Location | Wound Length (cm) | Wound Width (cm) | Wound Depth (cm) | Wound Area (cm <sup>2</sup> ) |
| 95                    | F      | 87  | VLU        | RLE med        | 2.0               | 1.5              | 0.2              | 3.00                          |

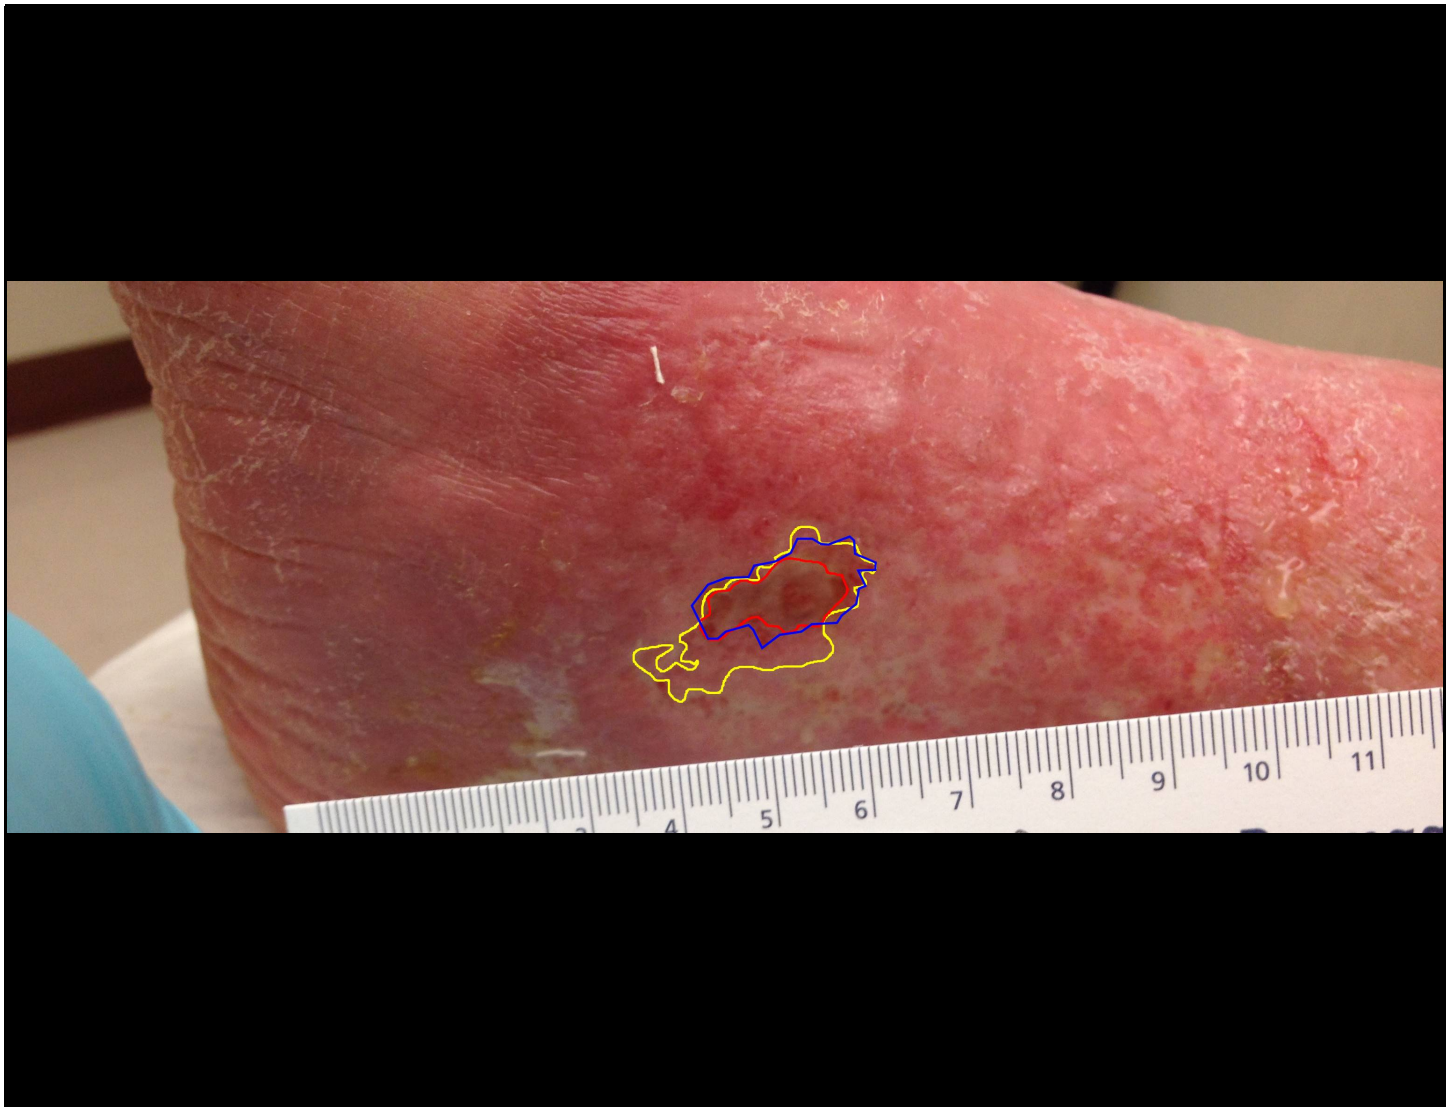

| Tracing Data |                               |                           |                               |
|--------------|-------------------------------|---------------------------|-------------------------------|
| Tracer:      | Wound Area (px <sup>2</sup> ) | Ruler Calibration (px/cm) | Wound Area (cm <sup>2</sup> ) |
| H1           | 94007                         | 219.0                     | 1.96                          |
| H2           | 36257                         | 214.1                     | 0.79                          |
| AI           | 58903                         | 212.9                     | 1.30                          |

| Tracing Comparisons     |                     |                     |                     |                     |
|-------------------------|---------------------|---------------------|---------------------|---------------------|
| Difference Metric:      | Human-Human         |                     | Human-AI            |                     |
|                         | H1(ref)<br>H2(test) | H2(ref)<br>H1(test) | H1(ref)<br>AI(test) | H2(ref)<br>AI(test) |
| False Negative Area (%) | 61.4                | 0.0                 | 42.4                | 1.3                 |
| False Positive Area (%) | 0.0                 | 159.3               | 5.0                 | 63.8                |
| Relative Error (%)      | 61.4                | 159.3               | 37.3                | 62.5                |

| Blinded Attending Surgeon Review |              |                      |                      |                      |              |                         |
|----------------------------------|--------------|----------------------|----------------------|----------------------|--------------|-------------------------|
| Reviewer                         | PGT Estimate | H1 meets definition? | H2 meets definition? | AI meets definition? | Which is AI? | Which is most accurate? |
| 1                                | 0            | No                   | Yes                  | No                   | H1           | H1                      |
| 2                                |              | No                   | No                   | No                   | H2           | H1                      |
| 3                                | 0            | No                   | Yes                  | Yes                  | AI           | H1                      |

| Wound EMR Information |        |     |            |                |                   |                  |                  |                               |
|-----------------------|--------|-----|------------|----------------|-------------------|------------------|------------------|-------------------------------|
| Sequential Number     | Gender | Age | Wound Type | Wound Location | Wound Length (cm) | Wound Width (cm) | Wound Depth (cm) | Wound Area (cm <sup>2</sup> ) |
| 96                    | M      | 53  | PU         | L ischium      | 3.0               | 1.2              | 0.1              | 3.60                          |

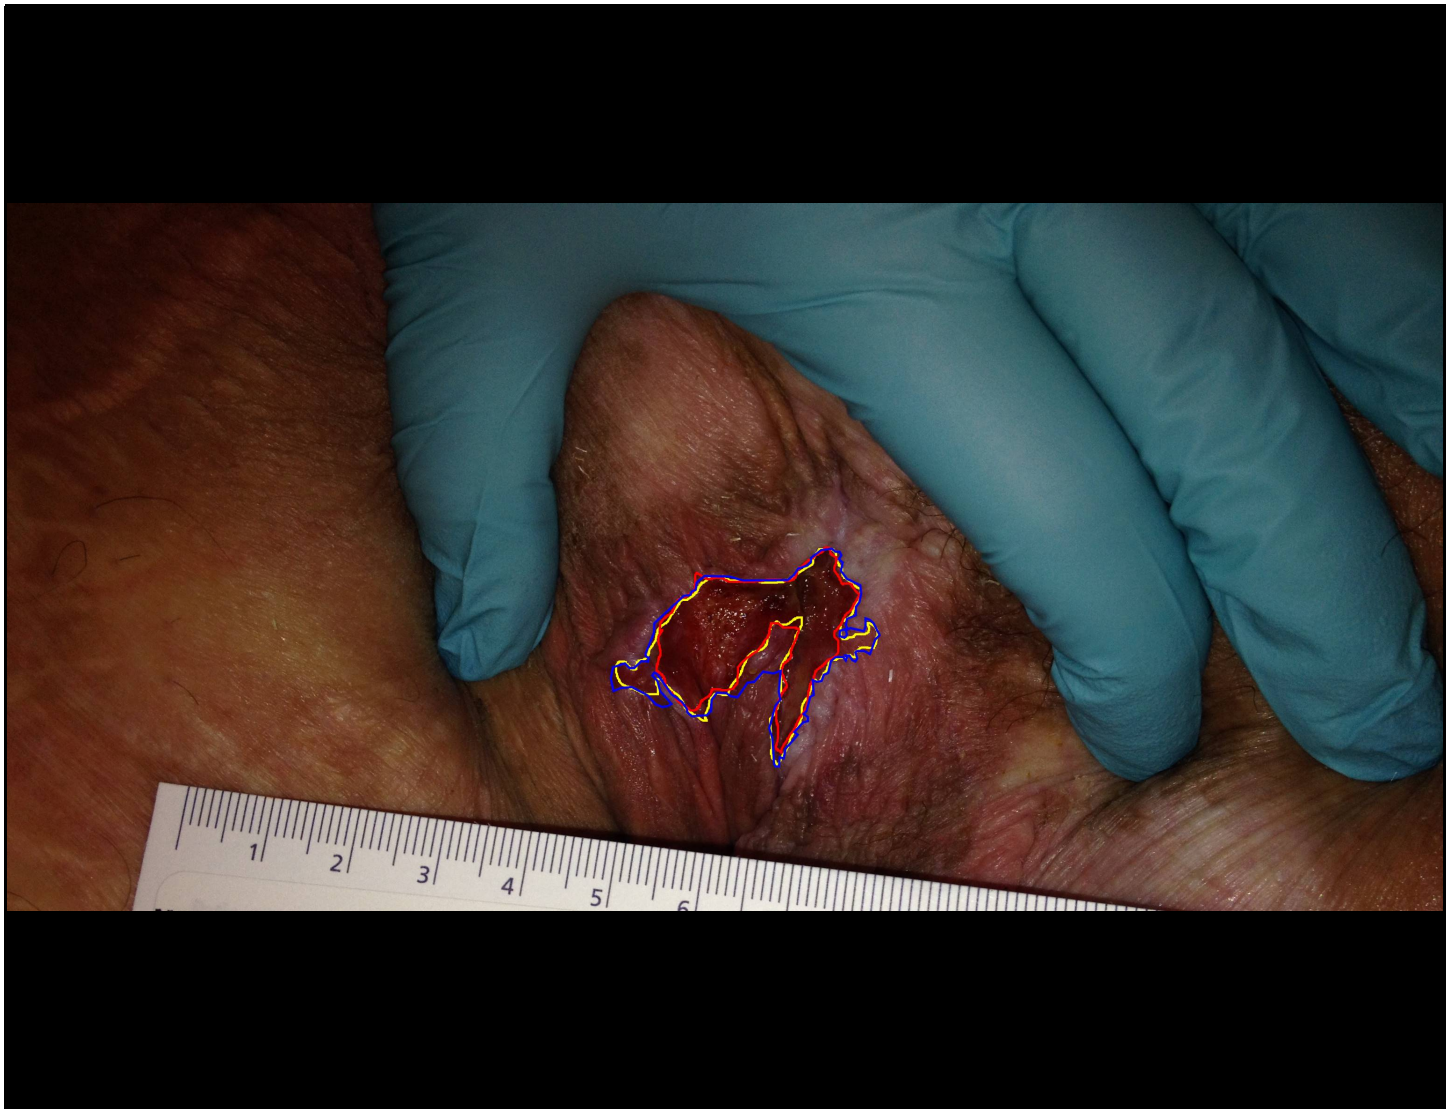

| Tracing Data |                               |                           |                               |
|--------------|-------------------------------|---------------------------|-------------------------------|
| Tracer:      | Wound Area (px <sup>2</sup> ) | Ruler Calibration (px/cm) | Wound Area (cm <sup>2</sup> ) |
| H1           | 111742                        | 196.3                     | 2.90                          |
| H2           | 96309                         | 200.4                     | 2.40                          |
| AI           | 131036                        | 196.3                     | 3.40                          |

| Tracing Comparisons     |                     |                     |                     |                     |
|-------------------------|---------------------|---------------------|---------------------|---------------------|
| Difference Metric:      | Human-Human         |                     | Human-AI            |                     |
|                         | H1(ref)<br>H2(test) | H2(ref)<br>H1(test) | H1(ref)<br>AI(test) | H2(ref)<br>AI(test) |
| False Negative Area (%) | 17.1                | 3.8                 | 1.2                 | 0.7                 |
| False Positive Area (%) | 3.3                 | 19.8                | 18.4                | 36.8                |
| Relative Error (%)      | 13.8                | 16.0                | 17.3                | 36.1                |

| Blinded Attending Surgeon Review |              |                      |                      |                      |              |                         |
|----------------------------------|--------------|----------------------|----------------------|----------------------|--------------|-------------------------|
| Reviewer                         | PGT Estimate | H1 meets definition? | H2 meets definition? | AI meets definition? | Which is AI? | Which is most accurate? |
| 1                                | 50           | No                   | Yes                  | No                   | H2           | AI                      |
| 2                                | <10          | Yes                  | Yes                  | No                   | H1           | H1                      |
| 3                                | 60           | No                   | Yes                  | No                   | H2           | AI                      |

| Wound EMR Information |        |     |            |                |                   |                  |                  |                               |
|-----------------------|--------|-----|------------|----------------|-------------------|------------------|------------------|-------------------------------|
| Sequential Number     | Gender | Age | Wound Type | Wound Location | Wound Length (cm) | Wound Width (cm) | Wound Depth (cm) | Wound Area (cm <sup>2</sup> ) |
| 97                    | M      | 71  | VLU        | RLE lat        | 10.0              | 7.0              | 0.1              | 70.00                         |

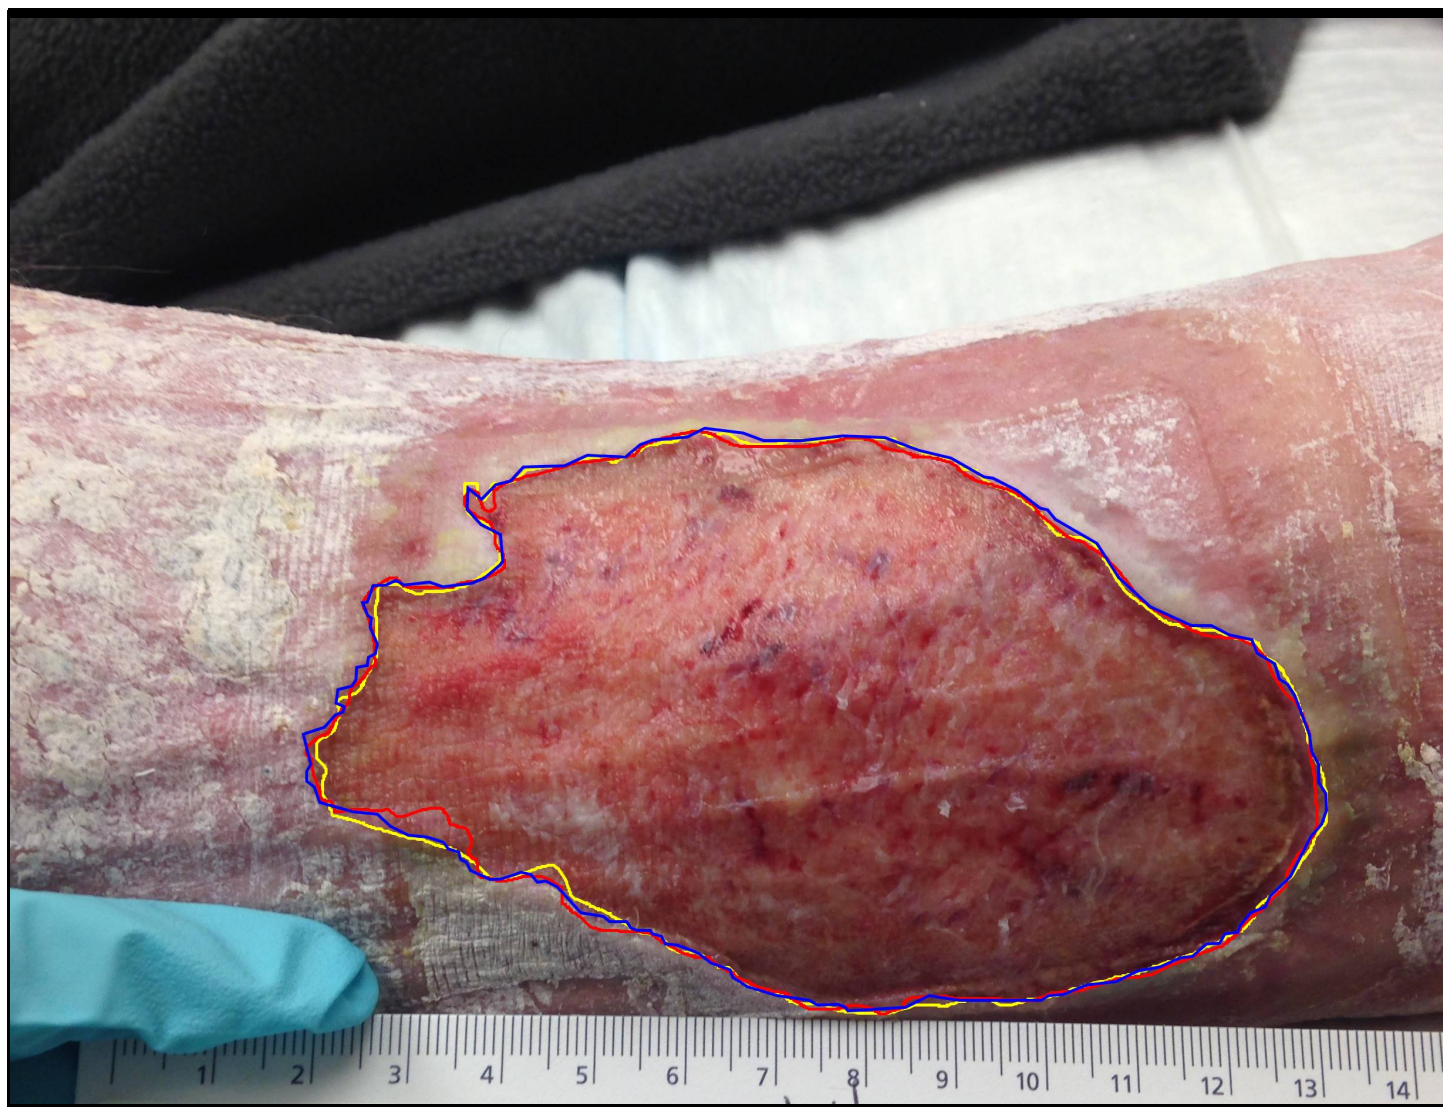

| Tracing Data |                               |                           |                               |
|--------------|-------------------------------|---------------------------|-------------------------------|
| Tracer:      | Wound Area (px <sup>2</sup> ) | Ruler Calibration (px/cm) | Wound Area (cm <sup>2</sup> ) |
| H1           | 1184619                       | 154.0                     | 49.92                         |
| H2           | 1176017                       | 154.1                     | 49.55                         |
| AI           | 1194677                       | 160.5                     | 46.40                         |

| Tracing Comparisons     |                     |                     |                     |                     |
|-------------------------|---------------------|---------------------|---------------------|---------------------|
| Difference Metric:      | Human-Human         |                     | Human-AI            |                     |
|                         | H1(ref)<br>H2(test) | H2(ref)<br>H1(test) | H1(ref)<br>AI(test) | H2(ref)<br>AI(test) |
| False Negative Area (%) | 2.0                 | 1.3                 | 0.7                 | 0.7                 |
| False Positive Area (%) | 1.3                 | 2.0                 | 1.6                 | 2.3                 |
| Relative Error (%)      | 0.7                 | 0.7                 | 0.8                 | 1.6                 |

| Blinded Attending Surgeon Review |              |                      |                      |                      |              |                         |
|----------------------------------|--------------|----------------------|----------------------|----------------------|--------------|-------------------------|
| Reviewer                         | PGT Estimate | H1 meets definition? | H2 meets definition? | AI meets definition? | Which is AI? | Which is most accurate? |
| 1                                | 0            | Yes                  | Yes                  | Yes                  | AI           | H2                      |
| 2                                |              | Yes                  | Yes                  | Yes                  | H1           | H2                      |
| 3                                | 100          | Yes                  | Yes                  | Yes                  | H1           | H1                      |

| Wound EMR Information |        |     |            |                |                   |                  |                  |                               |
|-----------------------|--------|-----|------------|----------------|-------------------|------------------|------------------|-------------------------------|
| Sequential Number     | Gender | Age | Wound Type | Wound Location | Wound Length (cm) | Wound Width (cm) | Wound Depth (cm) | Wound Area (cm <sup>2</sup> ) |
| 98                    | M      | 64  | VLU        | L ankle        | 1.3               | 0.9              | 0.2              | 1.17                          |

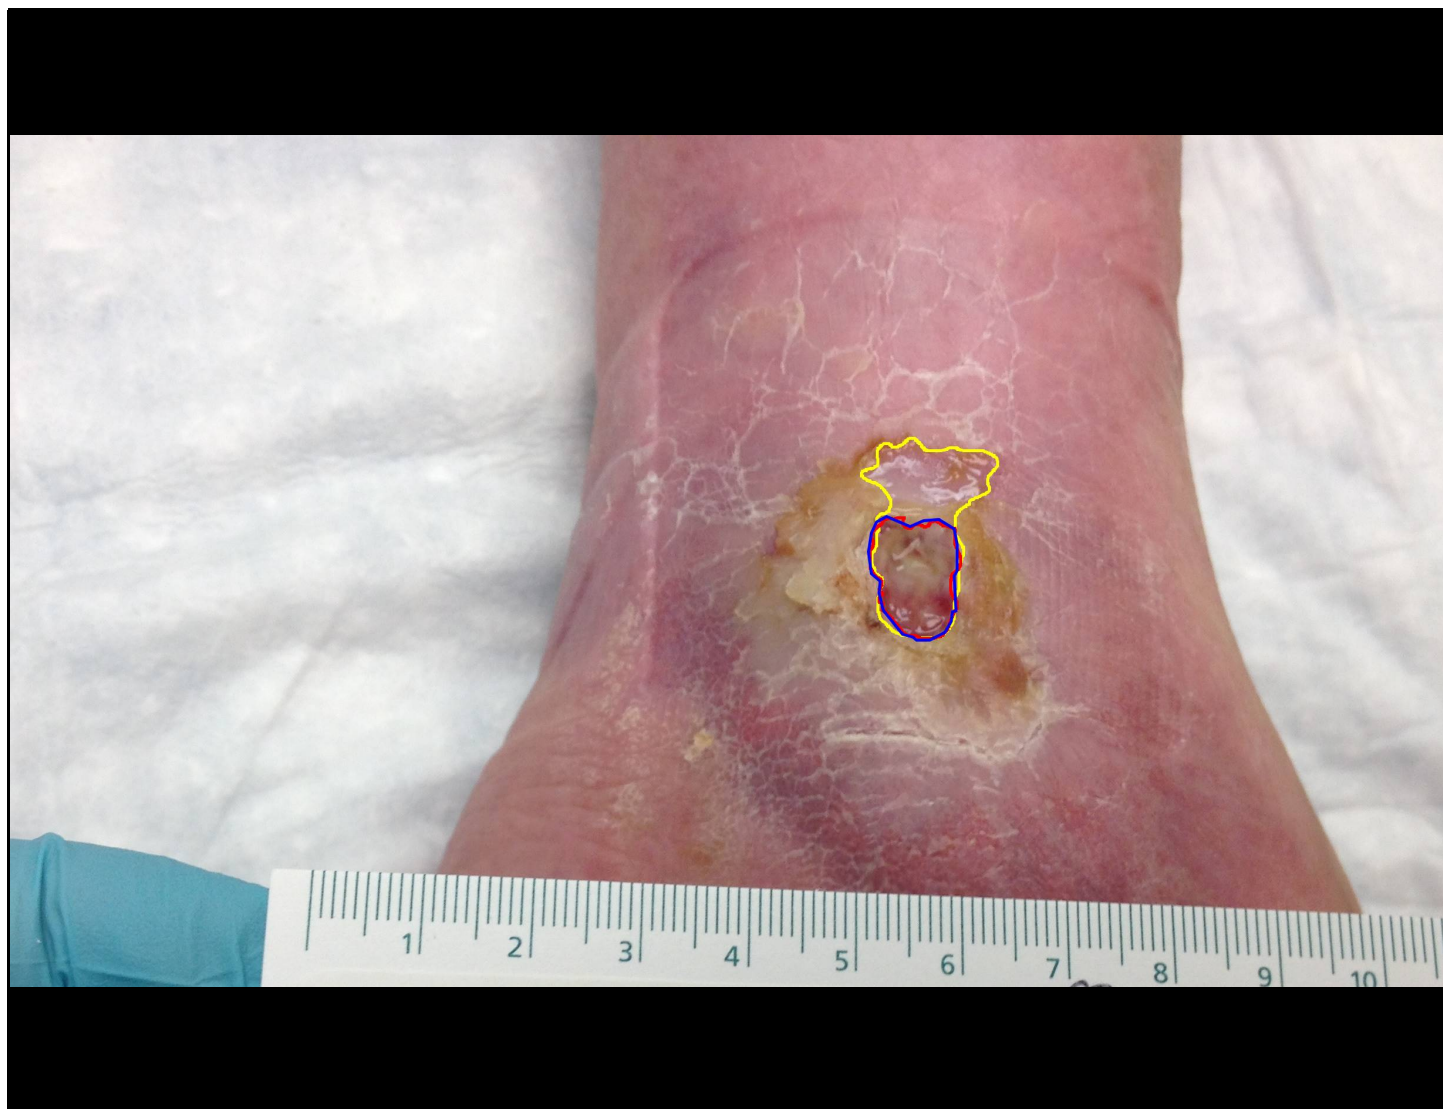

| Tracing Data |                               |                           |                               |
|--------------|-------------------------------|---------------------------|-------------------------------|
| Tracer:      | Wound Area (px <sup>2</sup> ) | Ruler Calibration (px/cm) | Wound Area (cm <sup>2</sup> ) |
| H1           | 47790                         | 180.3                     | 1.47                          |
| H2           | 24160                         | 180.8                     | 0.74                          |
| AI           | 25150                         | 189.5                     | 0.70                          |

| Tracing Comparisons     |                     |                     |                     |                     |
|-------------------------|---------------------|---------------------|---------------------|---------------------|
| Difference Metric:      | Human-Human         |                     | Human-AI            |                     |
|                         | H1(ref)<br>H2(test) | H2(ref)<br>H1(test) | H1(ref)<br>AI(test) | H2(ref)<br>AI(test) |
| False Negative Area (%) | 50.8                | 2.7                 | 49.4                | 1.6                 |
| False Positive Area (%) | 1.3                 | 100.5               | 2.0                 | 5.7                 |
| Relative Error (%)      | 49.4                | 97.8                | 47.4                | 4.1                 |

| Blinded Attending Surgeon Review |              |                      |                      |                      |              |                         |
|----------------------------------|--------------|----------------------|----------------------|----------------------|--------------|-------------------------|
| Reviewer                         | PGT Estimate | H1 meets definition? | H2 meets definition? | AI meets definition? | Which is AI? | Which is most accurate? |
| 1                                | 20           | No                   | Yes                  | Yes                  | H1           | H1                      |
| 2                                | 0            | Yes                  | No                   | No                   | H1           | H2                      |
| 3                                | 10           | No                   | Yes                  | Yes                  | AI           | H1                      |

| Wound EMR Information |        |     |            |                |                   |                  |                  |                               |
|-----------------------|--------|-----|------------|----------------|-------------------|------------------|------------------|-------------------------------|
| Sequential Number     | Gender | Age | Wound Type | Wound Location | Wound Length (cm) | Wound Width (cm) | Wound Depth (cm) | Wound Area (cm <sup>2</sup> ) |
| 99                    | F      | 81  | VLU        | R ankle        | 0.5               | 0.2              | 0.2              | 0.10                          |

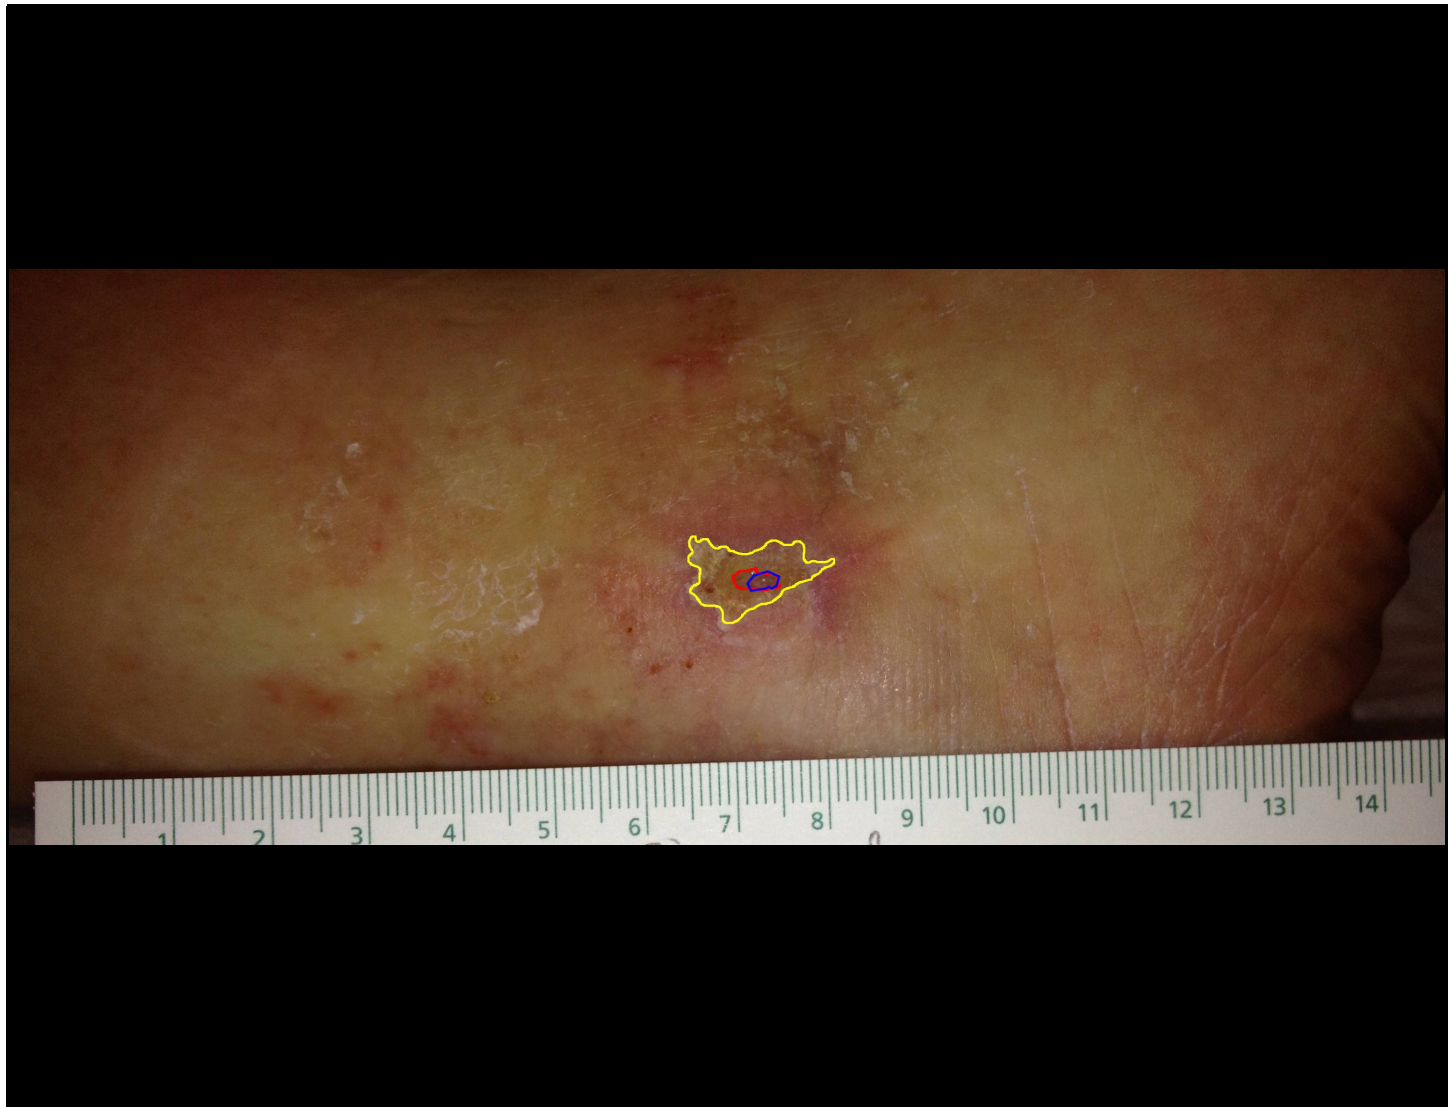

| Tracing Data |                               |                           |                               |
|--------------|-------------------------------|---------------------------|-------------------------------|
| Tracer:      | Wound Area (px <sup>2</sup> ) | Ruler Calibration (px/cm) | Wound Area (cm <sup>2</sup> ) |
| H1           | 34720                         | 208.3                     | 0.80                          |
| H2           | 3708                          | 208.9                     | 0.09                          |
| AI           | 2138                          | 208.9                     | 0.05                          |

| Tracing Comparisons     |                     |                     |                     |                     |
|-------------------------|---------------------|---------------------|---------------------|---------------------|
| Difference Metric:      | Human-Human         |                     | Human-AI            |                     |
|                         | H1(ref)<br>H2(test) | H2(ref)<br>H1(test) | H1(ref)<br>AI(test) | H2(ref)<br>AI(test) |
| False Negative Area (%) | 89.3                | 0.0                 | 93.9                | 46.3                |
| False Positive Area (%) | 0.0                 | 836.3               | 0.0                 | 3.9                 |
| Relative Error (%)      | 89.3                | 836.4               | 93.8                | 42.3                |

| Blinded Attending Surgeon Review |              |                      |                      |                      |              |                         |
|----------------------------------|--------------|----------------------|----------------------|----------------------|--------------|-------------------------|
| Reviewer                         | PGT Estimate | H1 meets definition? | H2 meets definition? | AI meets definition? | Which is AI? | Which is most accurate? |
| 1                                | 0            | No                   | Yes                  | No                   | H1           | H1                      |
| 2                                | 0            | No                   | Yes                  | Yes                  | H2           | AI                      |
| 3                                | 0            | No                   | Yes                  | Yes                  | AI           | H1                      |

| Wound EMR Information |        |     |            |                |                   |                  |                  |                               |
|-----------------------|--------|-----|------------|----------------|-------------------|------------------|------------------|-------------------------------|
| Sequential Number     | Gender | Age | Wound Type | Wound Location | Wound Length (cm) | Wound Width (cm) | Wound Depth (cm) | Wound Area (cm <sup>2</sup> ) |
| 100                   | M      | 81  | VLU        | LLE ant        | 1.1               | 0.4              | 0.1              | 0.44                          |

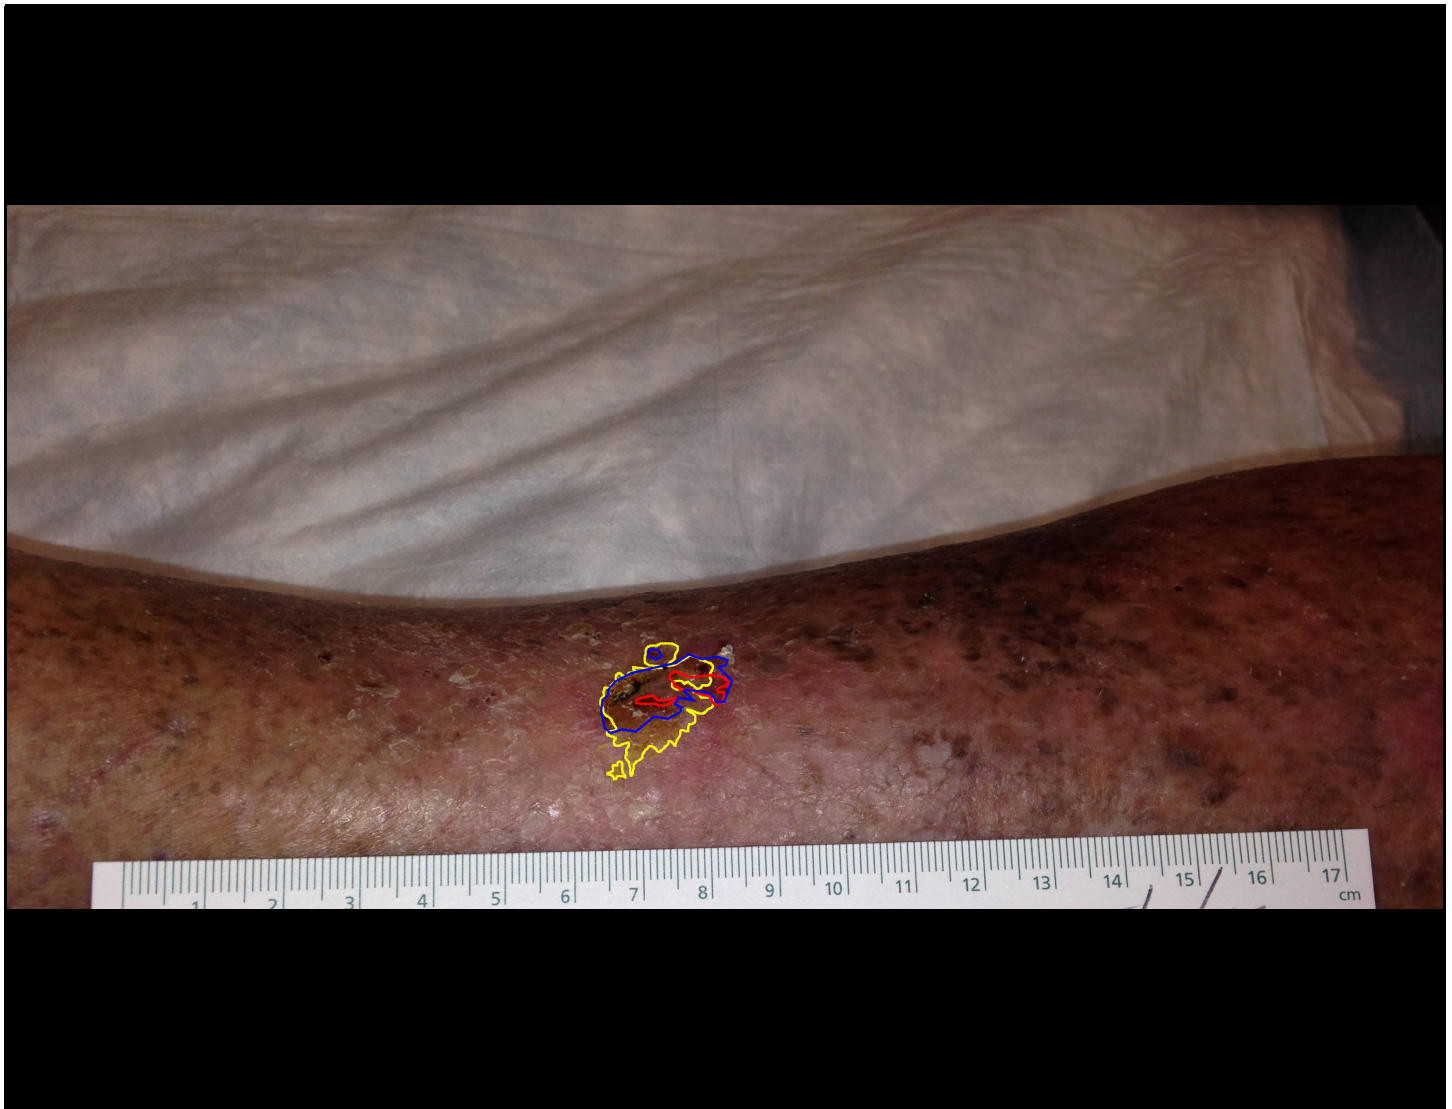

| Tracing Data |                               |                           |                               |
|--------------|-------------------------------|---------------------------|-------------------------------|
| Tracer:      | Wound Area (px <sup>2</sup> ) | Ruler Calibration (px/cm) | Wound Area (cm <sup>2</sup> ) |
| H1           | 41459                         | 157.1                     | 1.68                          |
| H2           | 6138                          | 154.8                     | 0.26                          |
| AI           | 29987                         | 165.1                     | 1.10                          |

| Tracing Comparisons     |                     |                     |                     |                     |
|-------------------------|---------------------|---------------------|---------------------|---------------------|
| Difference Metric:      | Human-Human         |                     | Human-AI            |                     |
|                         | H1(ref)<br>H2(test) | H2(ref)<br>H1(test) | H1(ref)<br>AI(test) | H2(ref)<br>AI(test) |
| False Negative Area (%) | 92.8                | 51.2                | 41.9                | 6.6                 |
| False Positive Area (%) | 7.6                 | 626.6               | 14.2                | 395.2               |
| Relative Error (%)      | 85.2                | 575.4               | 27.7                | 388.5               |

| Blinded Attending Surgeon Review |              |                      |                      |                      |              |                         |
|----------------------------------|--------------|----------------------|----------------------|----------------------|--------------|-------------------------|
| Reviewer                         | PGT Estimate | H1 meets definition? | H2 meets definition? | AI meets definition? | Which is AI? | Which is most accurate? |
| 1                                | 0            | No                   | No                   | No                   | H2           | None                    |
| 2                                | 0            | No                   | No                   | Yes                  | H2           | AI                      |
| 3                                | 0            | No                   | Yes                  | No                   | AI           | H1                      |

| Wound EMR Information |        |     |            |                |                   |                  |                  |                               |
|-----------------------|--------|-----|------------|----------------|-------------------|------------------|------------------|-------------------------------|
| Sequential Number     | Gender | Age | Wound Type | Wound Location | Wound Length (cm) | Wound Width (cm) | Wound Depth (cm) | Wound Area (cm <sup>2</sup> ) |
| 101                   | F      | 94  | Trauma     | RLE ant        | 3.0               | 4.0              | 0.1              | 12.00                         |

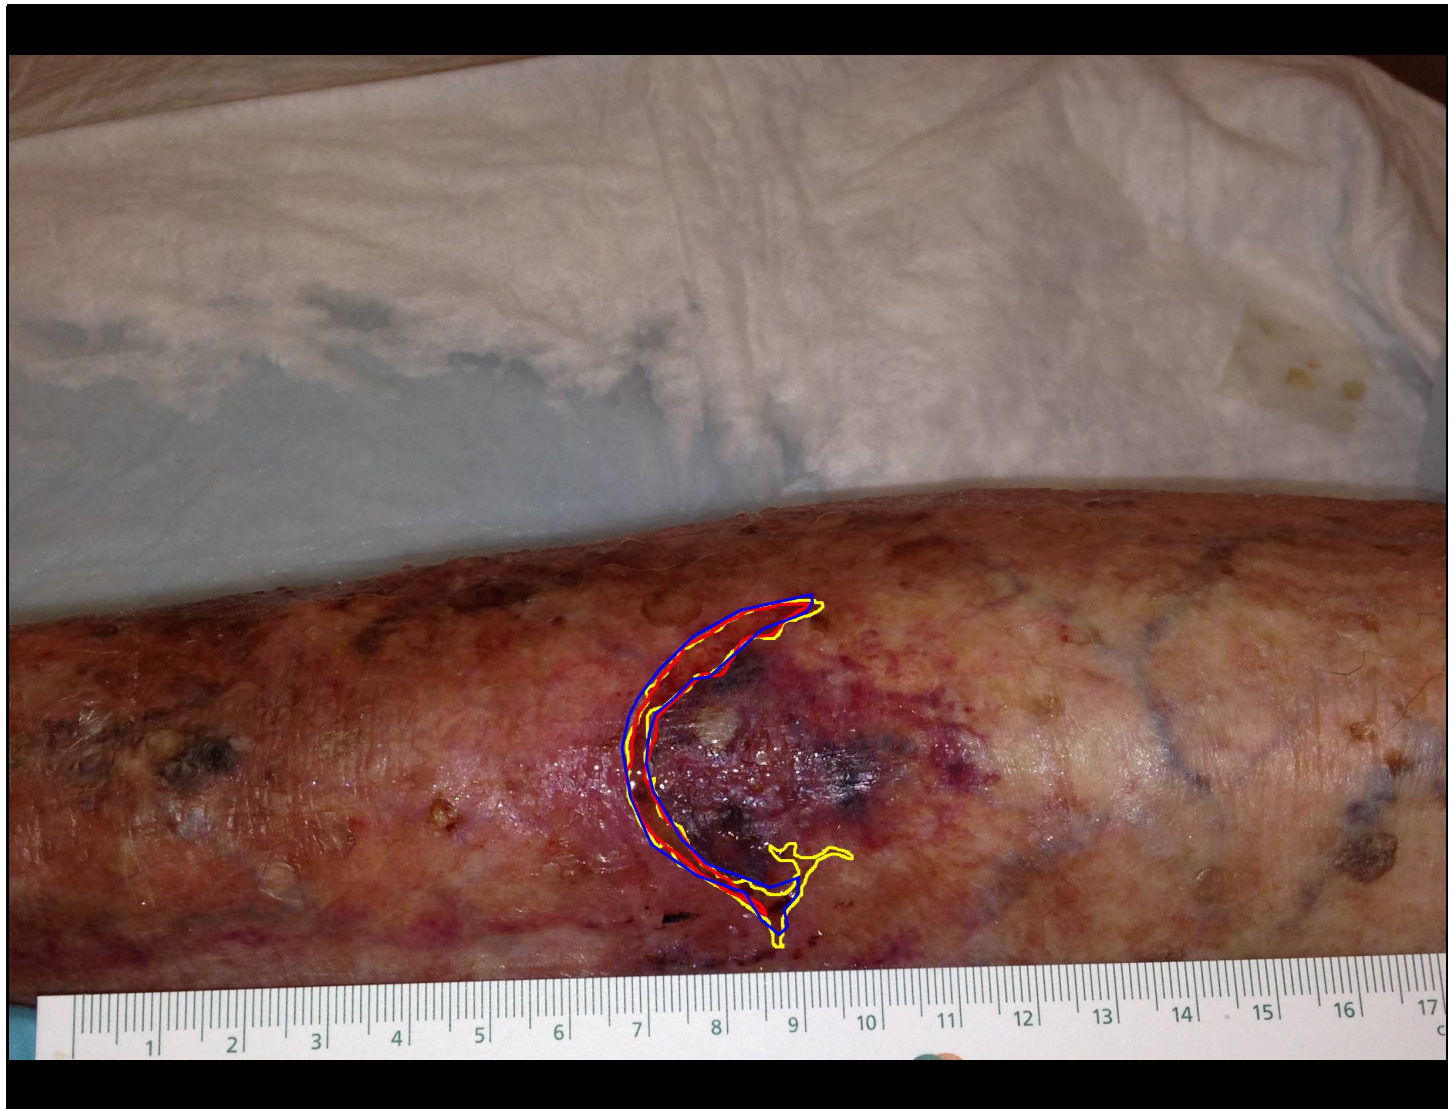

| Tracing Data |                               |                           |                               |
|--------------|-------------------------------|---------------------------|-------------------------------|
| Tracer:      | Wound Area (px <sup>2</sup> ) | Ruler Calibration (px/cm) | Wound Area (cm <sup>2</sup> ) |
| H1           | 34422                         | 132.2                     | 1.97                          |
| H2           | 25337                         | 132.1                     | 1.45                          |
| AI           | 36285                         | 142.0                     | 1.80                          |

| Tracing Comparisons     |                     |                     |                     |                     |
|-------------------------|---------------------|---------------------|---------------------|---------------------|
| Difference Metric:      | Human-Human         |                     | Human-AI            |                     |
|                         | H1(ref)<br>H2(test) | H2(ref)<br>H1(test) | H1(ref)<br>AI(test) | H2(ref)<br>AI(test) |
| False Negative Area (%) | 33.5                | 9.6                 | 17.6                | 8.6                 |
| False Positive Area (%) | 7.1                 | 45.5                | 23.0                | 51.8                |
| Relative Error (%)      | 26.4                | 35.9                | 5.4                 | 43.2                |

| Blinded Attending Surgeon Review |              |                      |                      |                      |              |                         |
|----------------------------------|--------------|----------------------|----------------------|----------------------|--------------|-------------------------|
| Reviewer                         | PGT Estimate | H1 meets definition? | H2 meets definition? | AI meets definition? | Which is AI? | Which is most accurate? |
| 1                                | 20           | No                   | No                   | No                   | H1           | None                    |
| 2                                | 0            | No                   | No                   | No                   | H1           | H1                      |
| 3                                | 10           | No                   | Yes                  | Yes                  | H2           | AI                      |

| Wound EMR Information |        |     |            |                |                   |                  |                  |                               |
|-----------------------|--------|-----|------------|----------------|-------------------|------------------|------------------|-------------------------------|
| Sequential Number     | Gender | Age | Wound Type | Wound Location | Wound Length (cm) | Wound Width (cm) | Wound Depth (cm) | Wound Area (cm <sup>2</sup> ) |
| 102                   | F      | 67  | PU         | R foot         | 5.9               | 2.8              | 1.0              | 16.52                         |

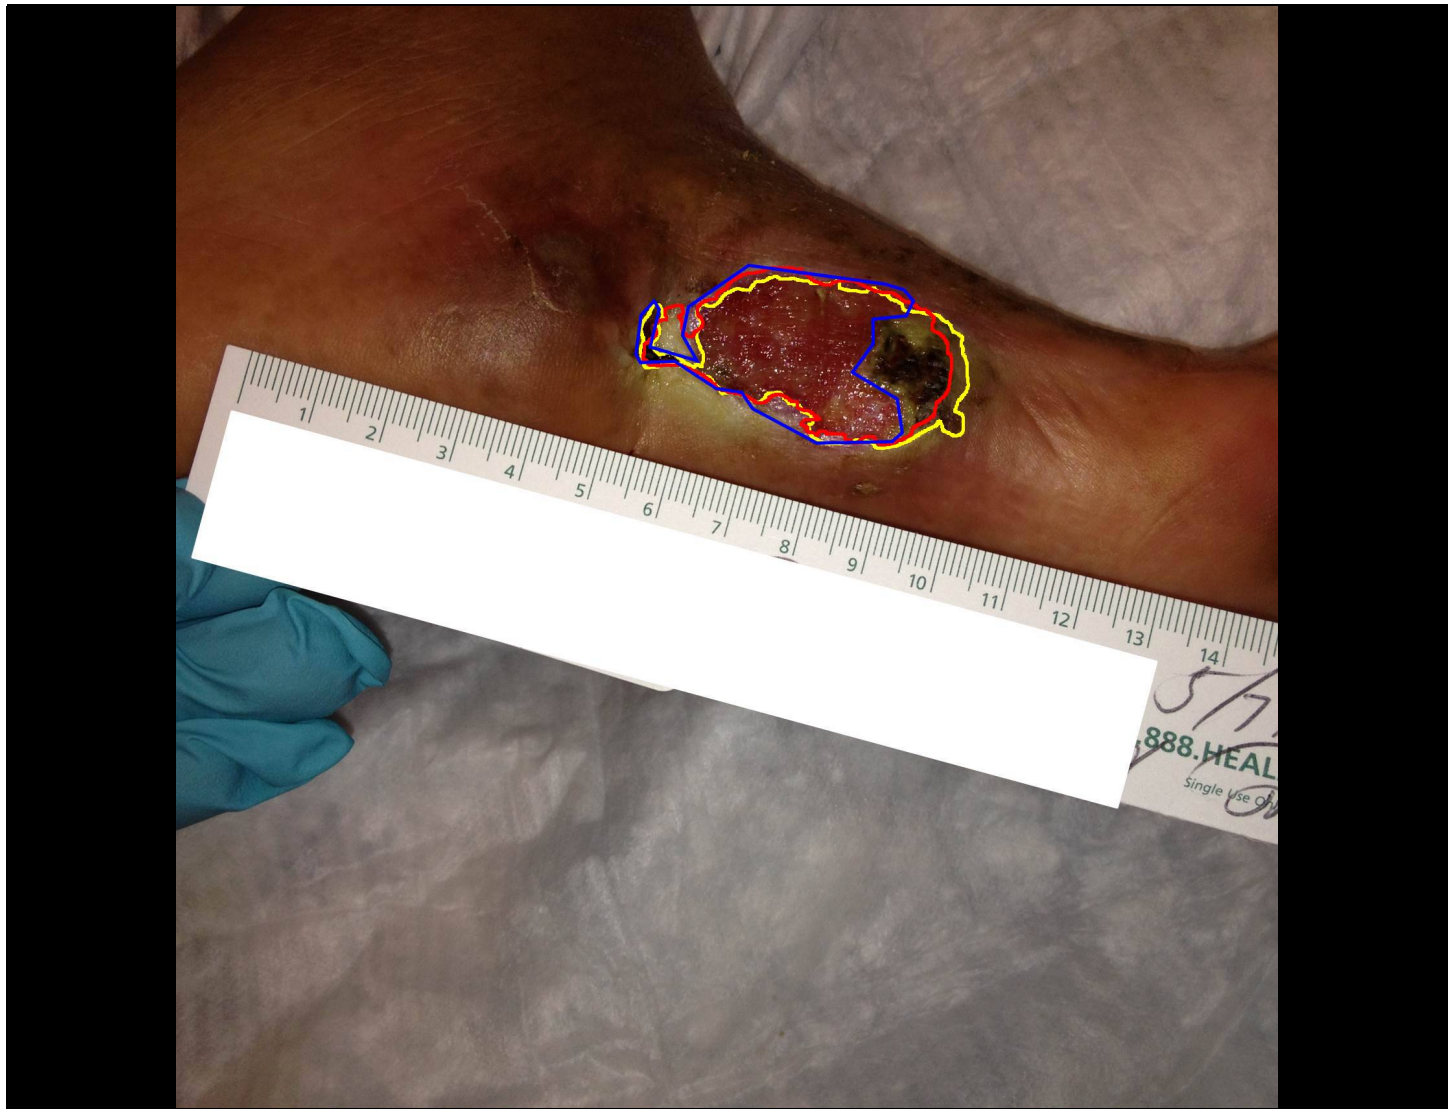

| Tracing Data |                               |                           |                               |
|--------------|-------------------------------|---------------------------|-------------------------------|
| Tracer:      | Wound Area (px <sup>2</sup> ) | Ruler Calibration (px/cm) | Wound Area (cm <sup>2</sup> ) |
| H1           | 81323                         | 110.2                     | 6.70                          |
| H2           | 80857                         | 108.3                     | 6.89                          |
| AI           | 69258                         | 104.0                     | 6.40                          |

| Tracing Comparisons     |                     |                     |                     |                     |
|-------------------------|---------------------|---------------------|---------------------|---------------------|
| Difference Metric:      | Human-Human         |                     | Human-AI            |                     |
|                         | H1(ref)<br>H2(test) | H2(ref)<br>H1(test) | H1(ref)<br>AI(test) | H2(ref)<br>AI(test) |
| False Negative Area (%) | 10.6                | 10.1                | 29.6                | 26.1                |
| False Positive Area (%) | 10.0                | 10.7                | 14.8                | 11.7                |
| Relative Error (%)      | 0.6                 | 0.6                 | 14.8                | 14.3                |

| Blinded Attending Surgeon Review |              |                      |                      |                      |              |                         |
|----------------------------------|--------------|----------------------|----------------------|----------------------|--------------|-------------------------|
| Reviewer                         | PGT Estimate | H1 meets definition? | H2 meets definition? | AI meets definition? | Which is AI? | Which is most accurate? |
| 1                                | 70           | Yes                  | No                   | Yes                  | H2           | H2                      |
| 2                                | 70           | Yes                  | Yes                  | No                   | AI           | H2                      |
| 3                                | 80           | No                   | Yes                  | No                   | AI           | H1                      |



| Wound EMR Information |        |     |            |                |                   |                  |                  |                               |
|-----------------------|--------|-----|------------|----------------|-------------------|------------------|------------------|-------------------------------|
| Sequential Number     | Gender | Age | Wound Type | Wound Location | Wound Length (cm) | Wound Width (cm) | Wound Depth (cm) | Wound Area (cm <sup>2</sup> ) |
| 103                   | F      | 83  | DFU        | L foot dorsal  | 2.9               | 1.0              | 0.2              | 2.90                          |

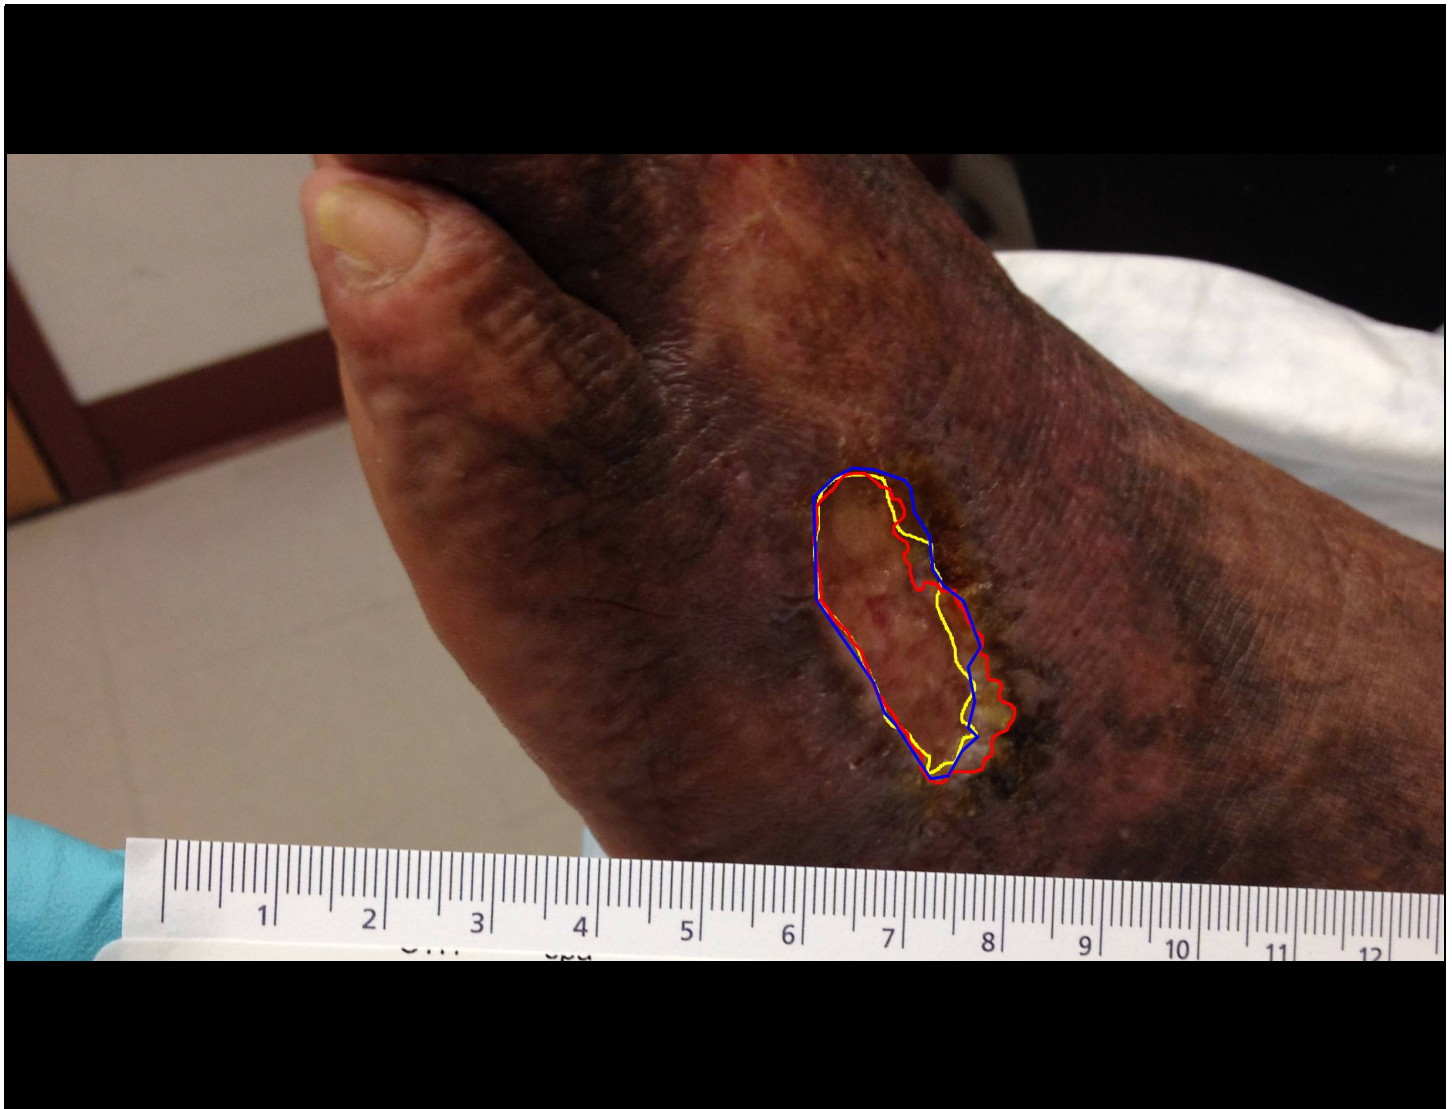

| Tracing Data |                               |                           |                               |
|--------------|-------------------------------|---------------------------|-------------------------------|
| Tracer:      | Wound Area (px <sup>2</sup> ) | Ruler Calibration (px/cm) | Wound Area (cm <sup>2</sup> ) |
| H1           | 74327                         | 171.1                     | 2.54                          |
| H2           | 87083                         | 172.2                     | 2.94                          |
| AI           | 89217                         | 172.4                     | 3.00                          |

| Tracing Comparisons     |                     |                     |                     |                     |
|-------------------------|---------------------|---------------------|---------------------|---------------------|
| Difference Metric:      | Human-Human         |                     | Human-AI            |                     |
|                         | H1(ref)<br>H2(test) | H2(ref)<br>H1(test) | H1(ref)<br>AI(test) | H2(ref)<br>AI(test) |
| False Negative Area (%) | 7.3                 | 20.9                | 0.5                 | 11.3                |
| False Positive Area (%) | 24.5                | 6.2                 | 20.6                | 13.7                |
| Relative Error (%)      | 17.2                | 14.6                | 20.0                | 2.5                 |

| Blinded Attending Surgeon Review |              |                      |                      |                      |              |                         |
|----------------------------------|--------------|----------------------|----------------------|----------------------|--------------|-------------------------|
| Reviewer                         | PGT Estimate | H1 meets definition? | H2 meets definition? | AI meets definition? | Which is AI? | Which is most accurate? |
| 1                                | 0            | No                   | Yes                  | No                   | H1           | AI                      |
| 2                                | 0            | Yes                  | Yes                  | No                   | H1           | H2                      |
| 3                                | 10           | Yes                  | No                   | Yes                  | AI           | H2                      |

| Wound EMR Information |        |     |            |                |                   |                  |                  |                               |
|-----------------------|--------|-----|------------|----------------|-------------------|------------------|------------------|-------------------------------|
| Sequential Number     | Gender | Age | Wound Type | Wound Location | Wound Length (cm) | Wound Width (cm) | Wound Depth (cm) | Wound Area (cm <sup>2</sup> ) |
| 104                   | M      | 77  | VLU        | R ankle        | 2.0               | 2.8              | 0.2              | 5.60                          |

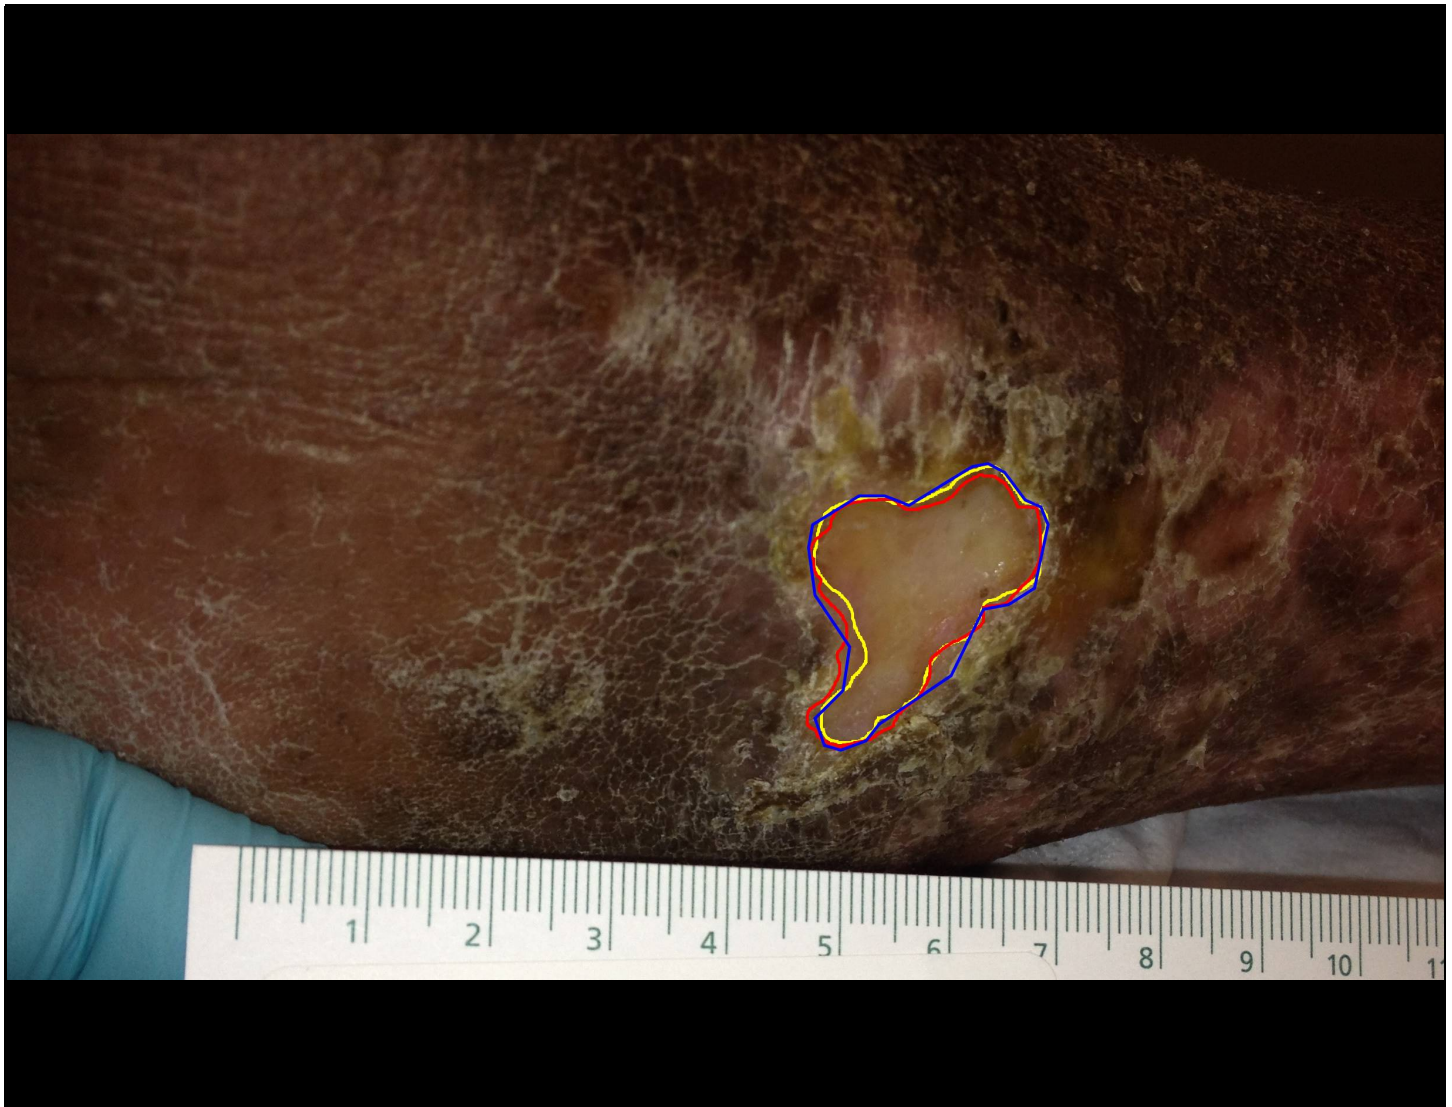

| Tracing Data |                               |                           |                               |
|--------------|-------------------------------|---------------------------|-------------------------------|
| Tracer:      | Wound Area (px <sup>2</sup> ) | Ruler Calibration (px/cm) | Wound Area (cm <sup>2</sup> ) |
| H1           | 101790                        | 193.4                     | 2.72                          |
| H2           | 105822                        | 192.2                     | 2.87                          |
| AI           | 115422                        | 196.1                     | 3.00                          |

| Tracing Comparisons     |                     |                     |                     |                     |
|-------------------------|---------------------|---------------------|---------------------|---------------------|
| Difference Metric:      | Human-Human         |                     | Human-AI            |                     |
|                         | H1(ref)<br>H2(test) | H2(ref)<br>H1(test) | H1(ref)<br>AI(test) | H2(ref)<br>AI(test) |
| False Negative Area (%) | 5.4                 | 9.0                 | 0.5                 | 3.2                 |
| False Positive Area (%) | 9.4                 | 5.2                 | 13.9                | 12.3                |
| Relative Error (%)      | 4.0                 | 3.8                 | 13.4                | 9.1                 |

| Blinded Attending Surgeon Review |              |                      |                      |                      |              |                         |
|----------------------------------|--------------|----------------------|----------------------|----------------------|--------------|-------------------------|
| Reviewer                         | PGT Estimate | H1 meets definition? | H2 meets definition? | AI meets definition? | Which is AI? | Which is most accurate? |
| 1                                | 0            | Yes                  | Yes                  | Yes                  | H1           | H2                      |
| 2                                | 0            | No                   | No                   | No                   | AI           | H1                      |
| 3                                | 0            | Yes                  | Yes                  | No                   | H2           | H1                      |

| Wound EMR Information |        |     |            |                |                   |                  |                  |                               |
|-----------------------|--------|-----|------------|----------------|-------------------|------------------|------------------|-------------------------------|
| Sequential Number     | Gender | Age | Wound Type | Wound Location | Wound Length (cm) | Wound Width (cm) | Wound Depth (cm) | Wound Area (cm <sup>2</sup> ) |
| 105                   | M      | 70  | Arterial   | R heel         | 1.3               | 2.0              | 0.1              | 2.60                          |

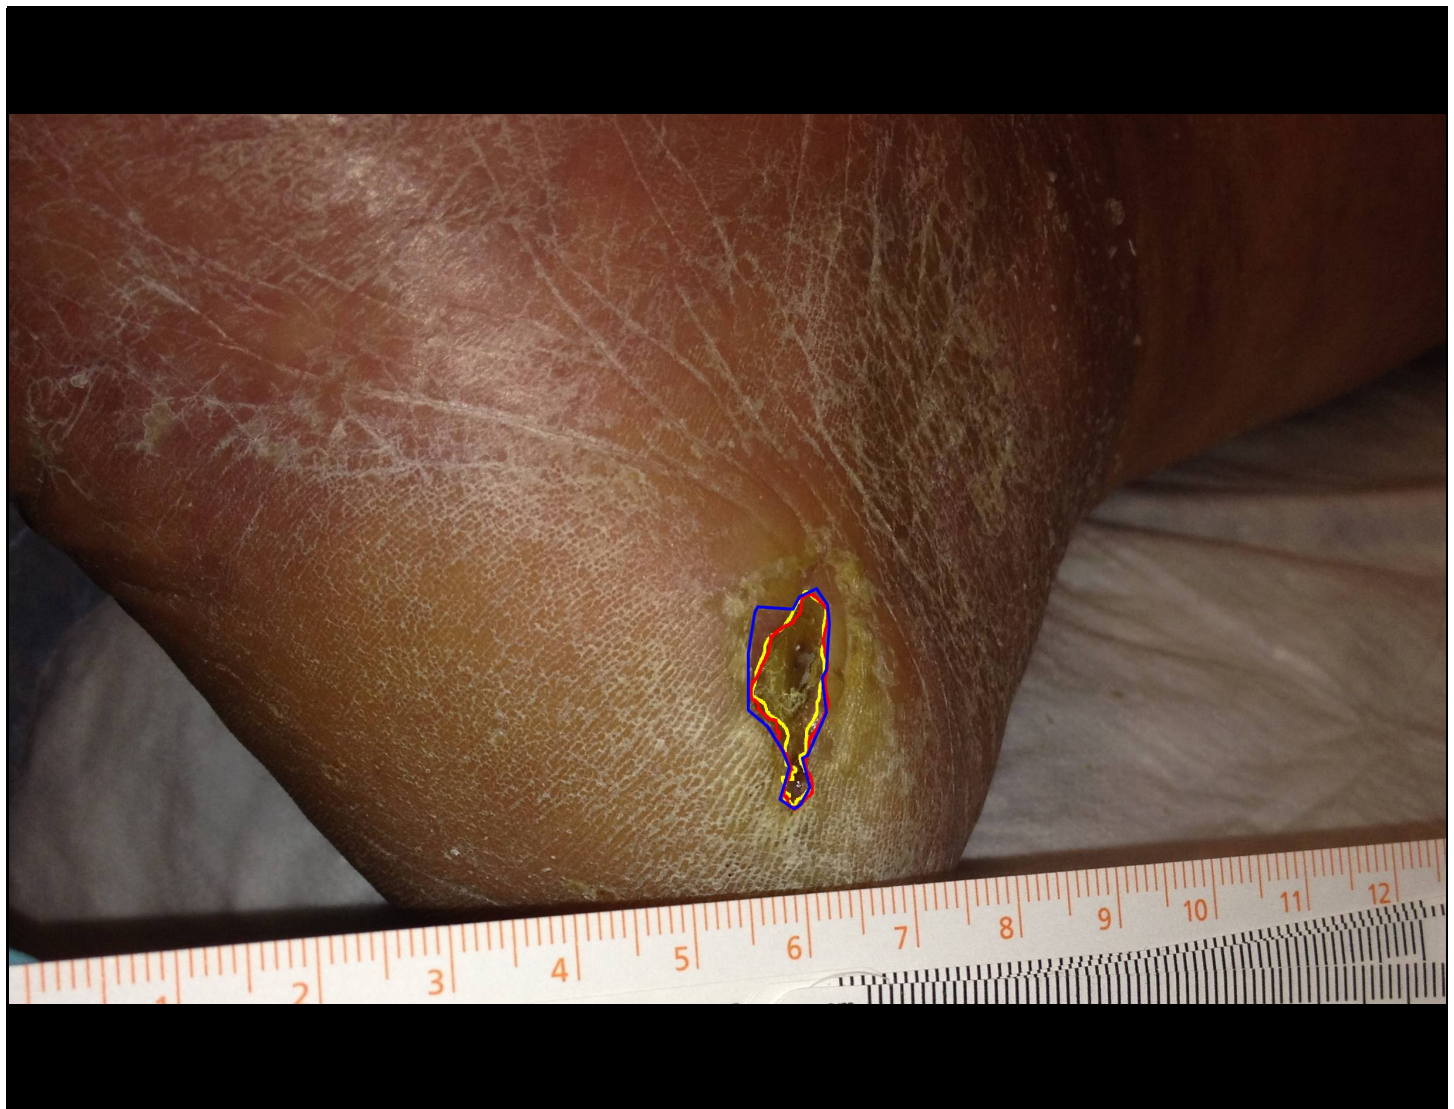

| Tracing Data |                               |                           |                               |
|--------------|-------------------------------|---------------------------|-------------------------------|
| Tracer:      | Wound Area (px <sup>2</sup> ) | Ruler Calibration (px/cm) | Wound Area (cm <sup>2</sup> ) |
| H1           | 23067                         | 184.2                     | 0.68                          |
| H2           | 26046                         | 192.6                     | 0.70                          |
| AI           | 33169                         | 235.1                     | 0.60                          |

| Tracing Comparisons     |                     |                     |                     |                     |
|-------------------------|---------------------|---------------------|---------------------|---------------------|
| Difference Metric:      | Human-Human         |                     | Human-AI            |                     |
|                         | H1(ref)<br>H2(test) | H2(ref)<br>H1(test) | H1(ref)<br>AI(test) | H2(ref)<br>AI(test) |
| False Negative Area (%) | 4.4                 | 15.3                | 0.6                 | 1.8                 |
| False Positive Area (%) | 17.3                | 3.9                 | 44.4                | 29.2                |
| Relative Error (%)      | 12.9                | 11.4                | 43.8                | 27.3                |

| Blinded Attending Surgeon Review |              |                      |                      |                      |              |                         |
|----------------------------------|--------------|----------------------|----------------------|----------------------|--------------|-------------------------|
| Reviewer                         | PGT Estimate | H1 meets definition? | H2 meets definition? | AI meets definition? | Which is AI? | Which is most accurate? |
| 1                                | 0            | Yes                  | No                   | No                   | AI           | AI                      |
| 2                                | 0            | Yes                  | Yes                  | No                   | H1           | AI                      |
| 3                                | 0            | Yes                  | Yes                  | No                   | H2           | AI                      |

| Wound EMR Information |        |     |            |                |                   |                  |                  |                               |
|-----------------------|--------|-----|------------|----------------|-------------------|------------------|------------------|-------------------------------|
| Sequential Number     | Gender | Age | Wound Type | Wound Location | Wound Length (cm) | Wound Width (cm) | Wound Depth (cm) | Wound Area (cm <sup>2</sup> ) |
| 106                   | F      | 40  | Surgical   | R forearm      | 8.5               | 1.2              | 0.3              | 10.20                         |

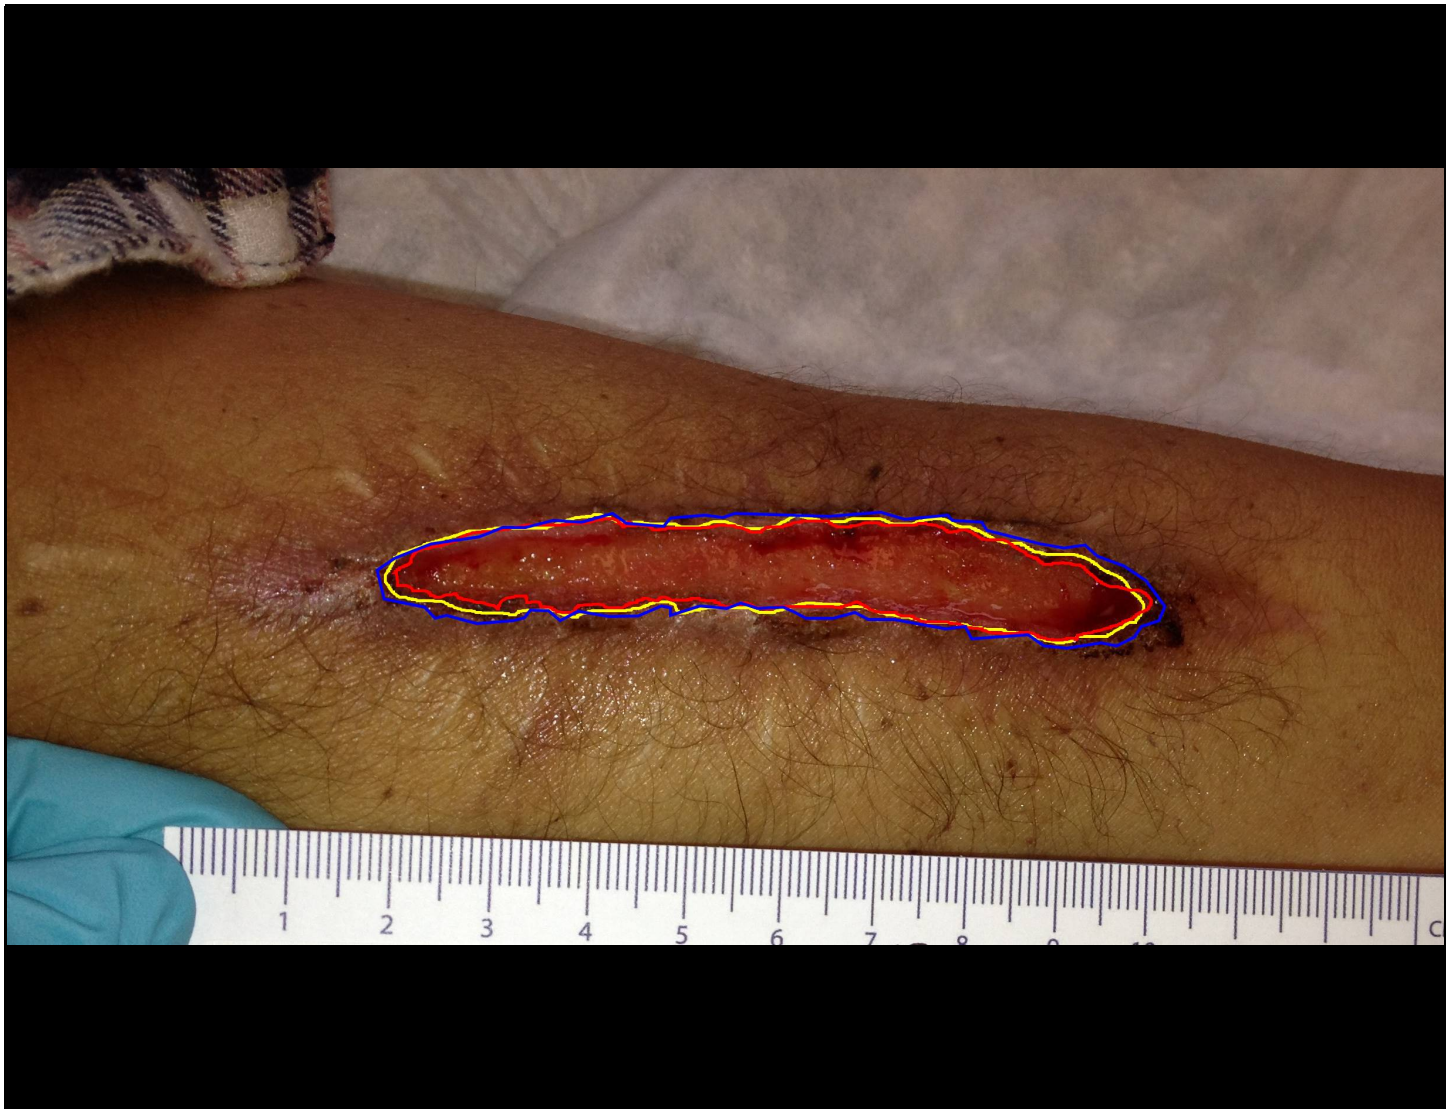

| Tracing Data |                               |                           |                               |
|--------------|-------------------------------|---------------------------|-------------------------------|
| Tracer:      | Wound Area (px <sup>2</sup> ) | Ruler Calibration (px/cm) | Wound Area (cm <sup>2</sup> ) |
| H1           | 180006                        | 166.8                     | 6.47                          |
| H2           | 161932                        | 166.9                     | 5.81                          |
| AI           | 205224                        | 171.2                     | 7.00                          |

| Tracing Comparisons     |                     |                     |                     |                     |
|-------------------------|---------------------|---------------------|---------------------|---------------------|
| Difference Metric:      | Human-Human         |                     | Human-AI            |                     |
|                         | H1(ref)<br>H2(test) | H2(ref)<br>H1(test) | H1(ref)<br>AI(test) | H2(ref)<br>AI(test) |
| False Negative Area (%) | 11.0                | 1.0                 | 1.4                 | 0.3                 |
| False Positive Area (%) | 0.9                 | 12.2                | 15.4                | 27.1                |
| Relative Error (%)      | 10.0                | 11.2                | 14.0                | 26.7                |

| Blinded Attending Surgeon Review |              |                      |                      |                      |              |                         |
|----------------------------------|--------------|----------------------|----------------------|----------------------|--------------|-------------------------|
| Reviewer                         | PGT Estimate | H1 meets definition? | H2 meets definition? | AI meets definition? | Which is AI? | Which is most accurate? |
| 1                                | 90           | Yes                  | Yes                  | Yes                  | H2           | H1                      |
| 2                                | <10          | No                   | Yes                  | No                   | H1           | AI                      |
| 3                                | 100          | Yes                  | Yes                  | Yes                  | H1           | H2                      |

| Wound EMR Information |        |     |            |                |                   |                  |                  |                               |
|-----------------------|--------|-----|------------|----------------|-------------------|------------------|------------------|-------------------------------|
| Sequential Number     | Gender | Age | Wound Type | Wound Location | Wound Length (cm) | Wound Width (cm) | Wound Depth (cm) | Wound Area (cm <sup>2</sup> ) |
| 107                   | F      | 30  | Arterial   | R hallux       | 1.5               | 1.4              | 0.3              | 2.10                          |

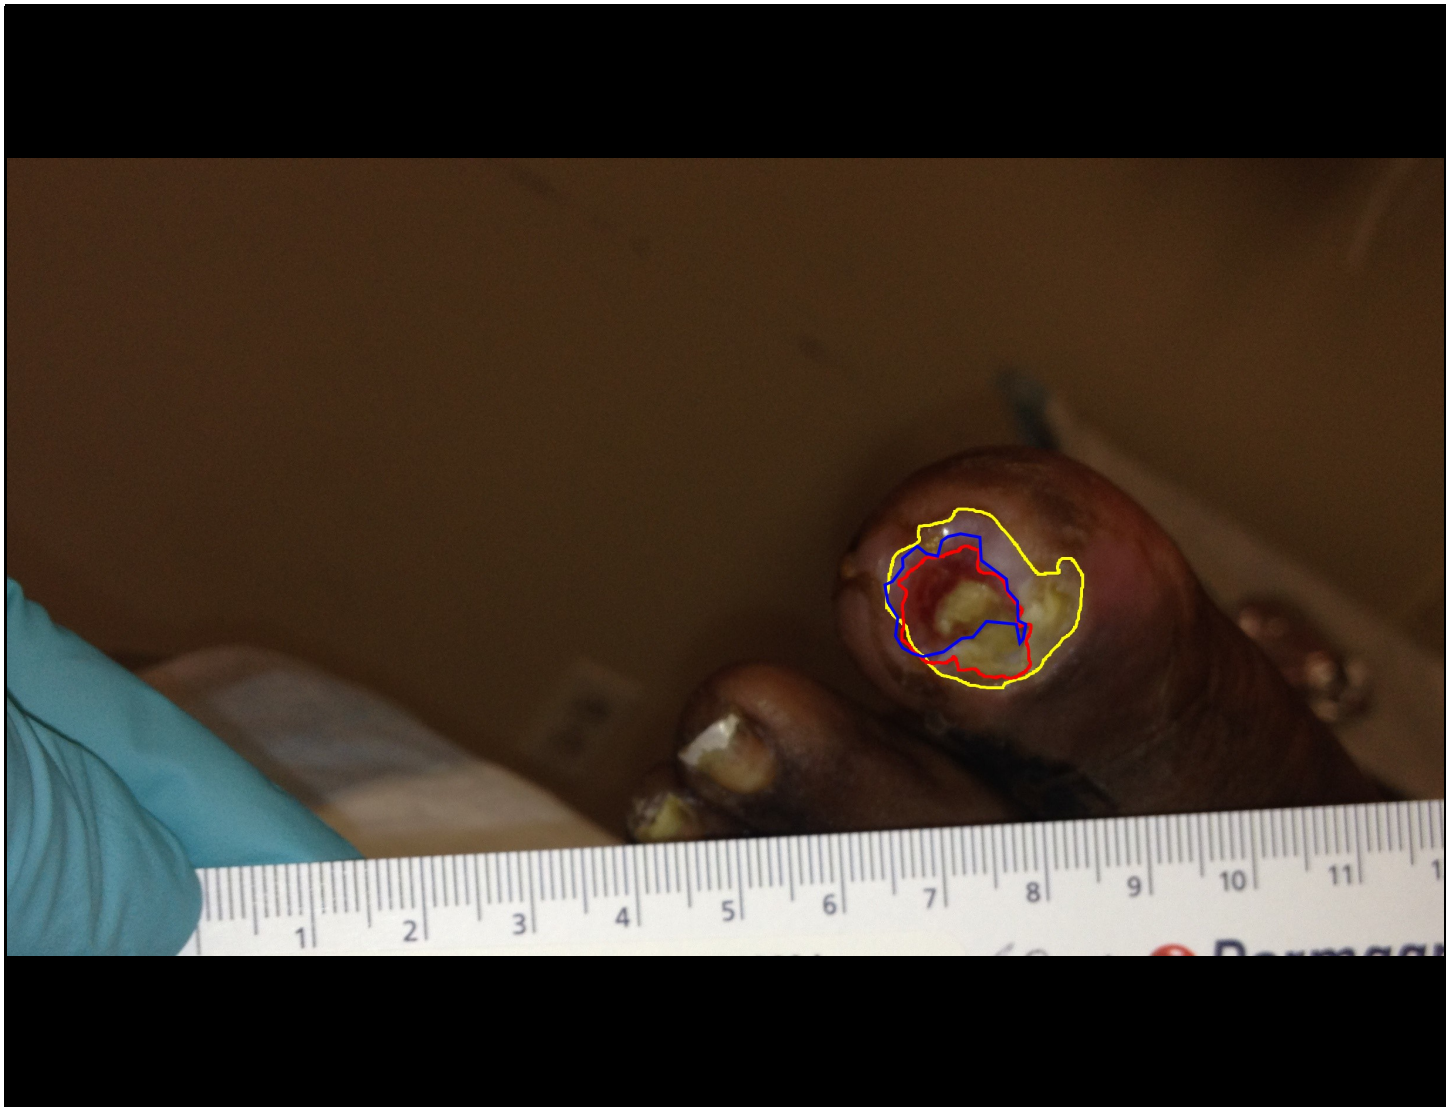

| Tracing Data |                               |                           |                               |
|--------------|-------------------------------|---------------------------|-------------------------------|
| Tracer:      | Wound Area (px <sup>2</sup> ) | Ruler Calibration (px/cm) | Wound Area (cm <sup>2</sup> ) |
| H1           | 68414                         | 176.3                     | 2.20                          |
| H2           | 35039                         | 175.5                     | 1.14                          |
| AI           | 30617                         | 175.0                     | 1.00                          |

| Tracing Comparisons     |                     |                     |                     |                     |
|-------------------------|---------------------|---------------------|---------------------|---------------------|
| Difference Metric:      | Human-Human         |                     | Human-AI            |                     |
|                         | H1(ref)<br>H2(test) | H2(ref)<br>H1(test) | H1(ref)<br>AI(test) | H2(ref)<br>AI(test) |
| False Negative Area (%) | 49.4                | 1.3                 | 56.8                | 29.5                |
| False Positive Area (%) | 0.7                 | 96.5                | 1.6                 | 16.9                |
| Relative Error (%)      | 48.8                | 95.3                | 55.2                | 12.6                |

| Blinded Attending Surgeon Review |              |                      |                      |                      |              |                         |
|----------------------------------|--------------|----------------------|----------------------|----------------------|--------------|-------------------------|
| Reviewer                         | PGT Estimate | H1 meets definition? | H2 meets definition? | AI meets definition? | Which is AI? | Which is most accurate? |
| 1                                | 50           | No                   | Yes                  | No                   | H2           | H2                      |
| 2                                | 20           | No                   | Yes                  | Yes                  | H1           | H1                      |
| 3                                | 30           | Yes                  | No                   | Yes                  | H1           | H1                      |

| Wound EMR Information |        |     |            |                |                   |                  |                  |                               |
|-----------------------|--------|-----|------------|----------------|-------------------|------------------|------------------|-------------------------------|
| Sequential Number     | Gender | Age | Wound Type | Wound Location | Wound Length (cm) | Wound Width (cm) | Wound Depth (cm) | Wound Area (cm <sup>2</sup> ) |
| 108                   | M      | 60  | DFU        | R plantar      | 0.6               | 0.5              | 0.1              | 0.30                          |

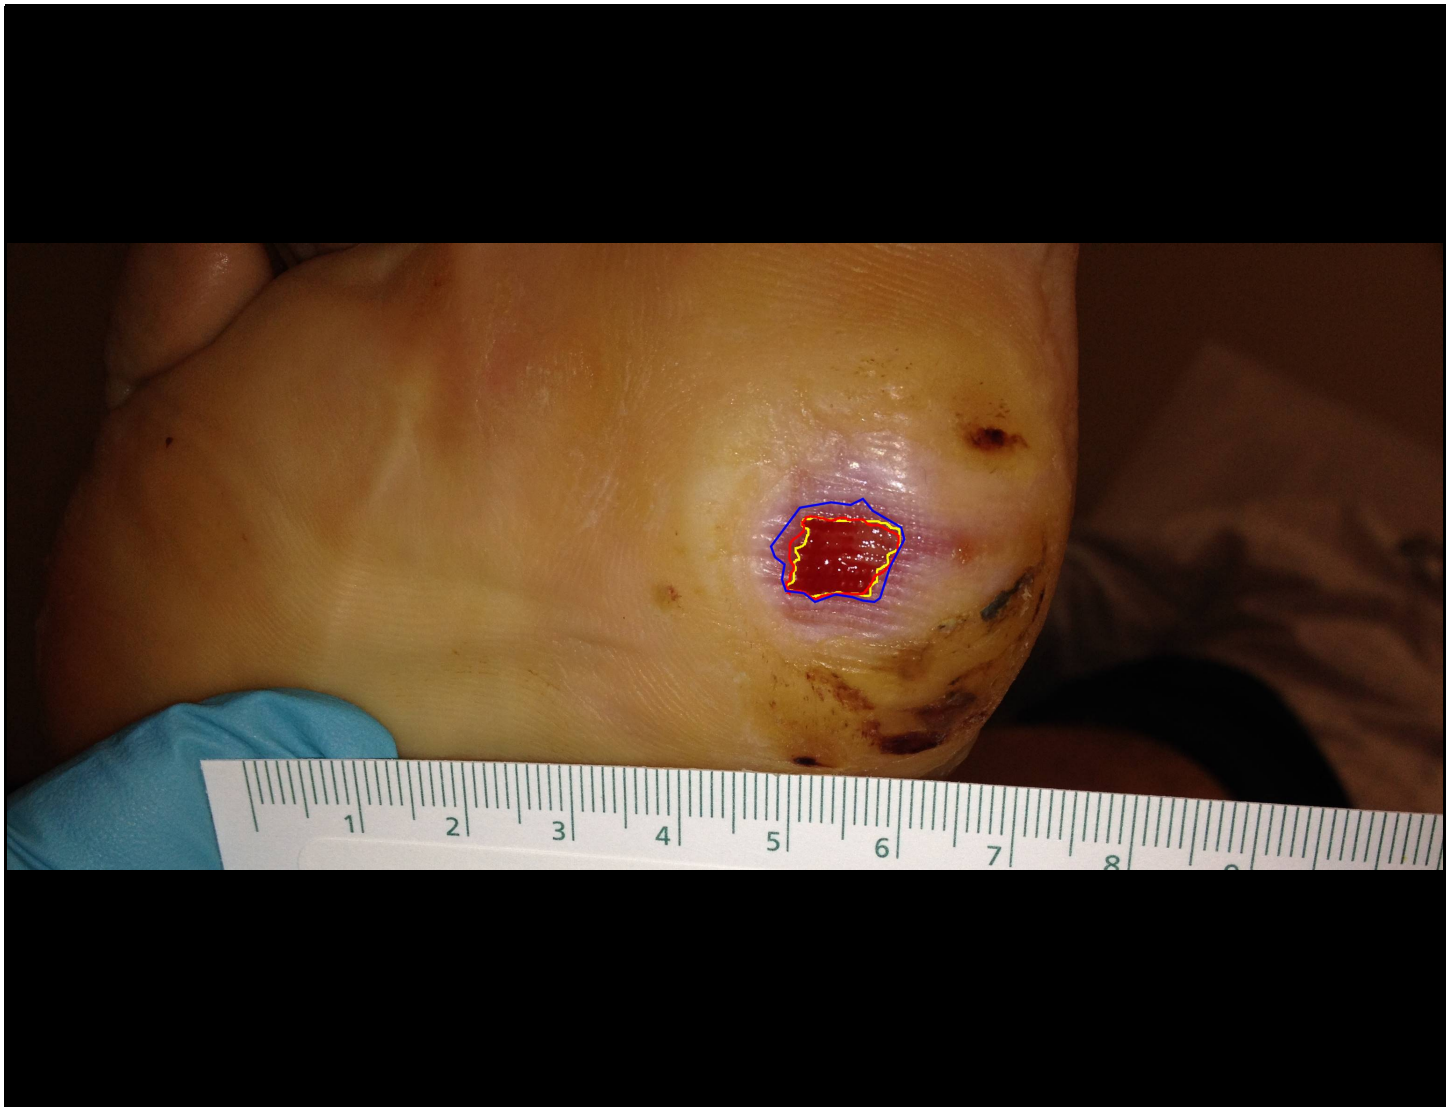

| Tracing Data |                               |                           |                               |
|--------------|-------------------------------|---------------------------|-------------------------------|
| Tracer:      | Wound Area (px <sup>2</sup> ) | Ruler Calibration (px/cm) | Wound Area (cm <sup>2</sup> ) |
| H1           | 33759                         | 252.4                     | 0.53                          |
| H2           | 35397                         | 256.3                     | 0.54                          |
| AI           | 51151                         | 226.2                     | 1.00                          |

| Tracing Comparisons     |                     |                     |                     |                     |
|-------------------------|---------------------|---------------------|---------------------|---------------------|
| Difference Metric:      | Human-Human         |                     | Human-AI            |                     |
|                         | H1(ref)<br>H2(test) | H2(ref)<br>H1(test) | H1(ref)<br>AI(test) | H2(ref)<br>AI(test) |
| False Negative Area (%) | 4.1                 | 8.5                 | 0.0                 | 0.0                 |
| False Positive Area (%) | 9.0                 | 3.9                 | 51.5                | 44.6                |
| Relative Error (%)      | 4.9                 | 4.6                 | 51.5                | 44.5                |

| Blinded Attending Surgeon Review |              |                      |                      |                      |              |                         |
|----------------------------------|--------------|----------------------|----------------------|----------------------|--------------|-------------------------|
| Reviewer                         | PGT Estimate | H1 meets definition? | H2 meets definition? | AI meets definition? | Which is AI? | Which is most accurate? |
| 1                                | 100          | Yes                  | Yes                  | No                   | H2           | H1                      |
| 2                                | 100          | No                   | No                   | No                   | H2           | H1                      |
| 3                                | 40           | Yes                  | Yes                  | No                   | AI           | H2                      |

| Wound EMR Information |        |     |            |                |                   |                  |                  |                               |
|-----------------------|--------|-----|------------|----------------|-------------------|------------------|------------------|-------------------------------|
| Sequential Number     | Gender | Age | Wound Type | Wound Location | Wound Length (cm) | Wound Width (cm) | Wound Depth (cm) | Wound Area (cm <sup>2</sup> ) |
| 109                   | F      | 59  | VLU        | LLE lat        | 1.2               | 0.9              | 0.3              | 1.08                          |

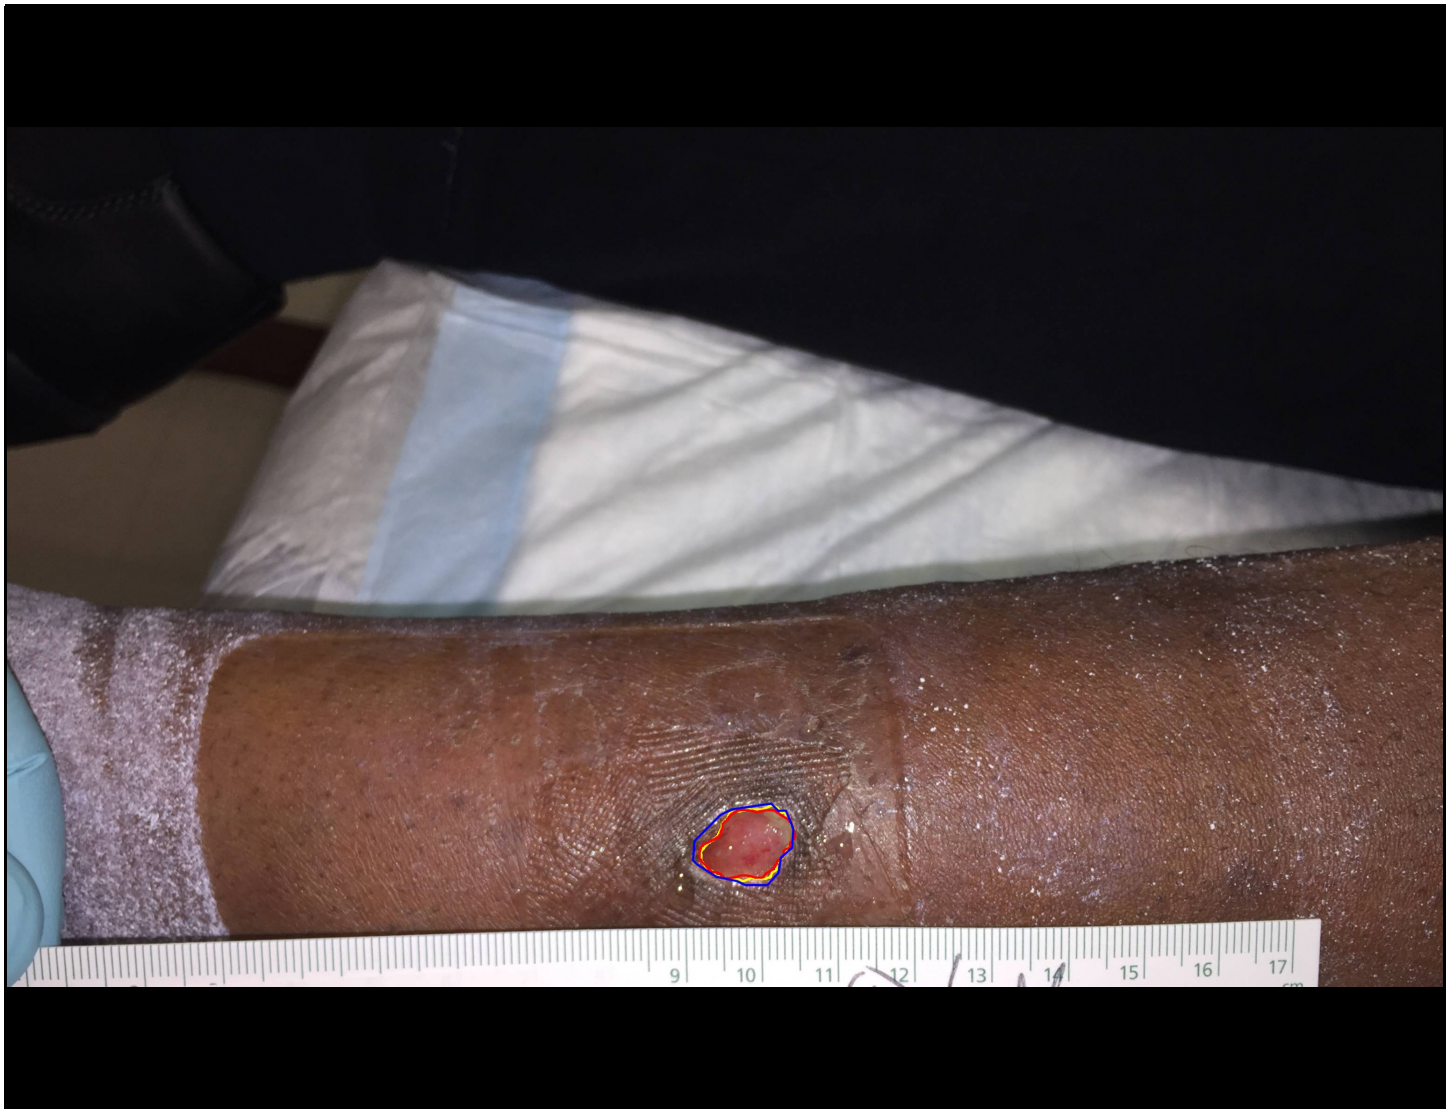

| Tracing Data |                               |                           |                               |
|--------------|-------------------------------|---------------------------|-------------------------------|
| Tracer:      | Wound Area (px <sup>2</sup> ) | Ruler Calibration (px/cm) | Wound Area (cm <sup>2</sup> ) |
| H1           | 25447                         | 173.0                     | 0.85                          |
| H2           | 23934                         | 172.0                     | 0.81                          |
| AI           | 30884                         | 175.7                     | 1.00                          |

| Tracing Comparisons     |                     |                     |                     |                     |
|-------------------------|---------------------|---------------------|---------------------|---------------------|
| Difference Metric:      | Human-Human         |                     | Human-AI            |                     |
|                         | H1(ref)<br>H2(test) | H2(ref)<br>H1(test) | H1(ref)<br>AI(test) | H2(ref)<br>AI(test) |
| False Negative Area (%) | 7.1                 | 1.2                 | 0.4                 | 0.3                 |
| False Positive Area (%) | 1.1                 | 7.5                 | 21.8                | 29.3                |
| Relative Error (%)      | 5.9                 | 6.3                 | 21.4                | 29.0                |

| Blinded Attending Surgeon Review |              |                      |                      |                      |              |                         |
|----------------------------------|--------------|----------------------|----------------------|----------------------|--------------|-------------------------|
| Reviewer                         | PGT Estimate | H1 meets definition? | H2 meets definition? | AI meets definition? | Which is AI? | Which is most accurate? |
| 1                                | 50           | Yes                  | Yes                  | No                   | H2           | H2                      |
| 2                                | 0            | Yes                  | Yes                  | No                   | AI           | AI                      |
| 3                                | 90           | Yes                  | Yes                  | No                   | H1           | AI                      |

| Wound EMR Information |        |     |            |                |                   |                  |                  |                               |
|-----------------------|--------|-----|------------|----------------|-------------------|------------------|------------------|-------------------------------|
| Sequential Number     | Gender | Age | Wound Type | Wound Location | Wound Length (cm) | Wound Width (cm) | Wound Depth (cm) | Wound Area (cm <sup>2</sup> ) |
| 110                   | M      | 65  | DFU        | R dorsal foot  | 1.8               | 2.4              | 0.2              | 4.32                          |

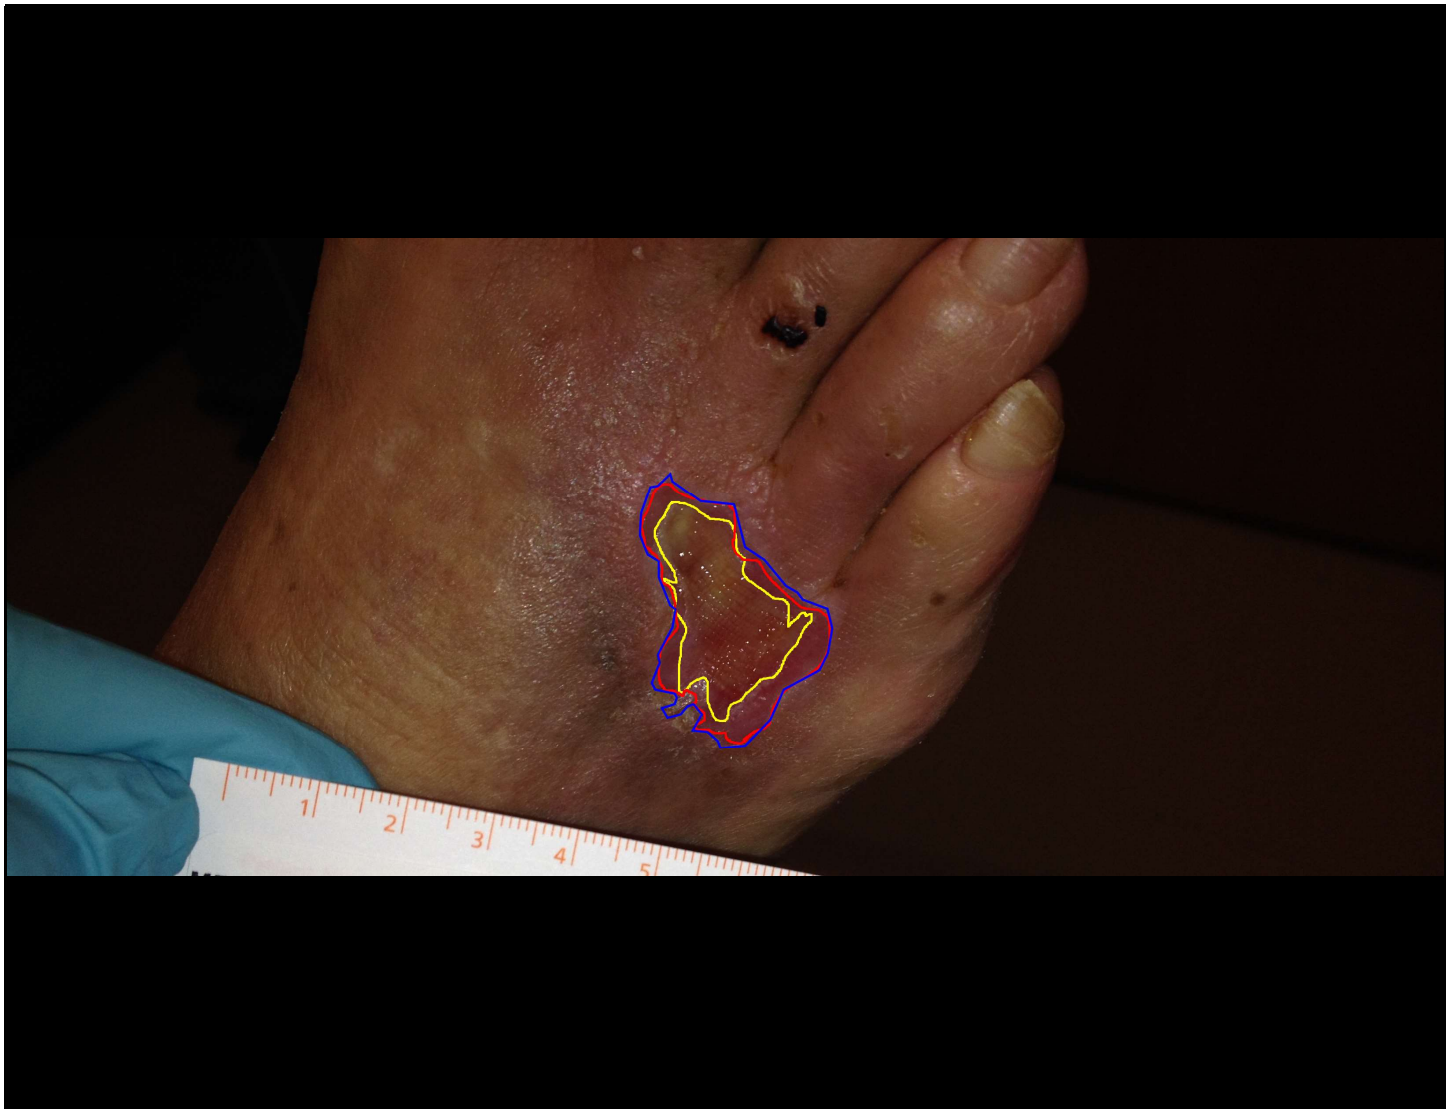

| Tracing Data |                               |                           |                               |
|--------------|-------------------------------|---------------------------|-------------------------------|
| Tracer:      | Wound Area (px <sup>2</sup> ) | Ruler Calibration (px/cm) | Wound Area (cm <sup>2</sup> ) |
| H1           | 88247                         | 196.7                     | 2.28                          |
| H2           | 138280                        | 195.6                     | 3.61                          |
| AI           | 153749                        | 201.1                     | 3.80                          |

| Tracing Comparisons     |                     |                     |                     |                     |
|-------------------------|---------------------|---------------------|---------------------|---------------------|
| Difference Metric:      | Human-Human         |                     | Human-AI            |                     |
|                         | H1(ref)<br>H2(test) | H2(ref)<br>H1(test) | H1(ref)<br>AI(test) | H2(ref)<br>AI(test) |
| False Negative Area (%) | 0.4                 | 36.4                | 0.0                 | 0.2                 |
| False Positive Area (%) | 57.1                | 0.2                 | 74.2                | 11.4                |
| Relative Error (%)      | 56.7                | 36.2                | 74.2                | 11.2                |

| Blinded Attending Surgeon Review |              |                      |                      |                      |              |                         |
|----------------------------------|--------------|----------------------|----------------------|----------------------|--------------|-------------------------|
| Reviewer                         | PGT Estimate | H1 meets definition? | H2 meets definition? | AI meets definition? | Which is AI? | Which is most accurate? |
| 1                                | 30           | No                   | Yes                  | Yes                  | H2           | H2                      |
| 2                                | 0            | Yes                  | No                   | No                   | AI           | H1                      |
| 3                                | 40           | No                   | Yes                  | Yes                  | AI           | AI                      |



## eAppendix 2. Individual Photographs From Site 2

| Wound EMR Information |        |     |            |                |                   |                  |                  |                               |
|-----------------------|--------|-----|------------|----------------|-------------------|------------------|------------------|-------------------------------|
| Sequential Number     | Gender | Age | Wound Type | Wound Location | Wound Length (cm) | Wound Width (cm) | Wound Depth (cm) | Wound Area (cm <sup>2</sup> ) |
| 1                     | F      | 70  | Pressure   | Sacrum         | 3.0               |                  |                  |                               |

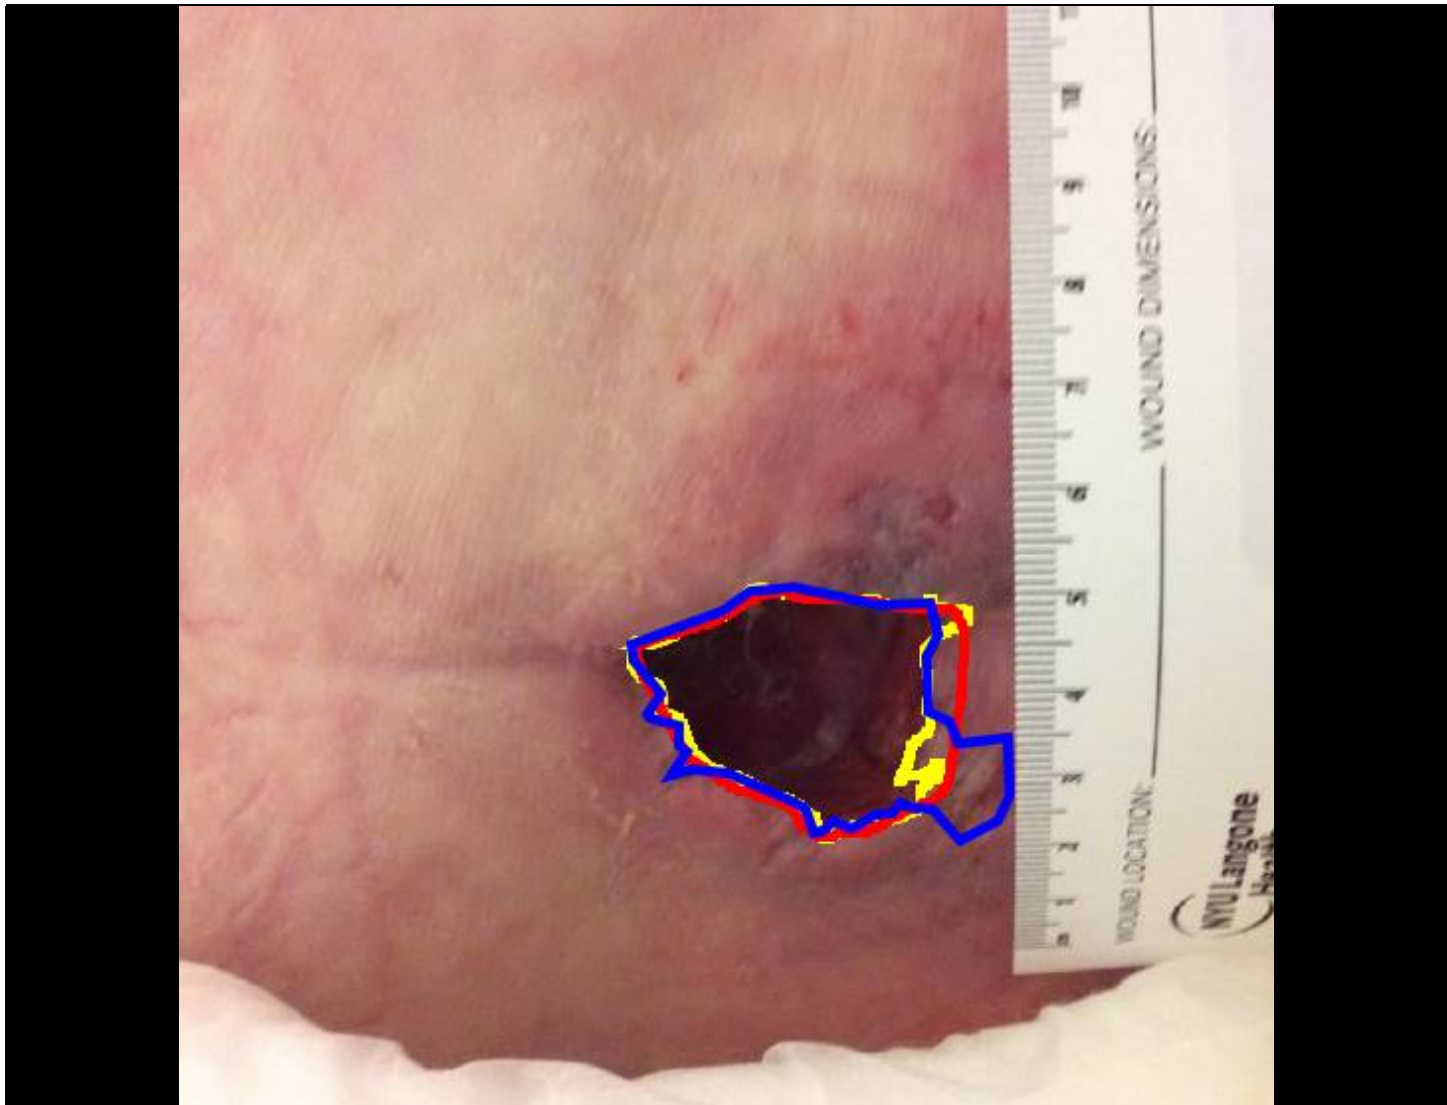

| Tracing Data |                               |                           |                               |
|--------------|-------------------------------|---------------------------|-------------------------------|
| Tracer:      | Wound Area (px <sup>2</sup> ) | Ruler Calibration (px/cm) | Wound Area (cm <sup>2</sup> ) |
| H1           | 13142                         | 42.7                      | 7.22                          |
| H2           | 14813                         | 46.0                      | 7.01                          |
| AI           | 15354                         | 51.9                      | 5.70                          |

| Tracing Comparisons     |                     |                     |                     |                     |
|-------------------------|---------------------|---------------------|---------------------|---------------------|
| Difference Metric:      | Human-Human         |                     | Human-AI            |                     |
|                         | H1(ref)<br>H2(test) | H2(ref)<br>H1(test) | H1(ref)<br>AI(test) | H2(ref)<br>AI(test) |
| False Negative Area (%) | 2.2                 | 13.2                | 3.1                 | 9.2                 |
| False Positive Area (%) | 14.9                | 1.9                 | 20.0                | 12.9                |
| Relative Error (%)      | 12.7                | 11.3                | 16.8                | 3.7                 |

| Blinded Attending Surgeon Review |              |                      |                      |                      |              |                         |
|----------------------------------|--------------|----------------------|----------------------|----------------------|--------------|-------------------------|
| Reviewer                         | PGT Estimate | H1 meets definition? | H2 meets definition? | AI meets definition? | Which is AI? | Which is most accurate? |
| 1                                | 90           | Yes                  | Yes                  | No                   | AI           | H1                      |
| 2                                | 50           | No                   | Yes                  | Yes                  | H2           | H1                      |

|   |    |     |    |    |    |    |
|---|----|-----|----|----|----|----|
| 3 | 80 | Yes | No | No | AI | H2 |
|---|----|-----|----|----|----|----|

| Wound EMR Information |        |     |            |                |                   |                  |                  |                               |
|-----------------------|--------|-----|------------|----------------|-------------------|------------------|------------------|-------------------------------|
| Sequential Number     | Gender | Age | Wound Type | Wound Location | Wound Length (cm) | Wound Width (cm) | Wound Depth (cm) | Wound Area (cm <sup>2</sup> ) |
| 2                     | F      | 22  | Surgical   | Breast-R       |                   |                  |                  |                               |

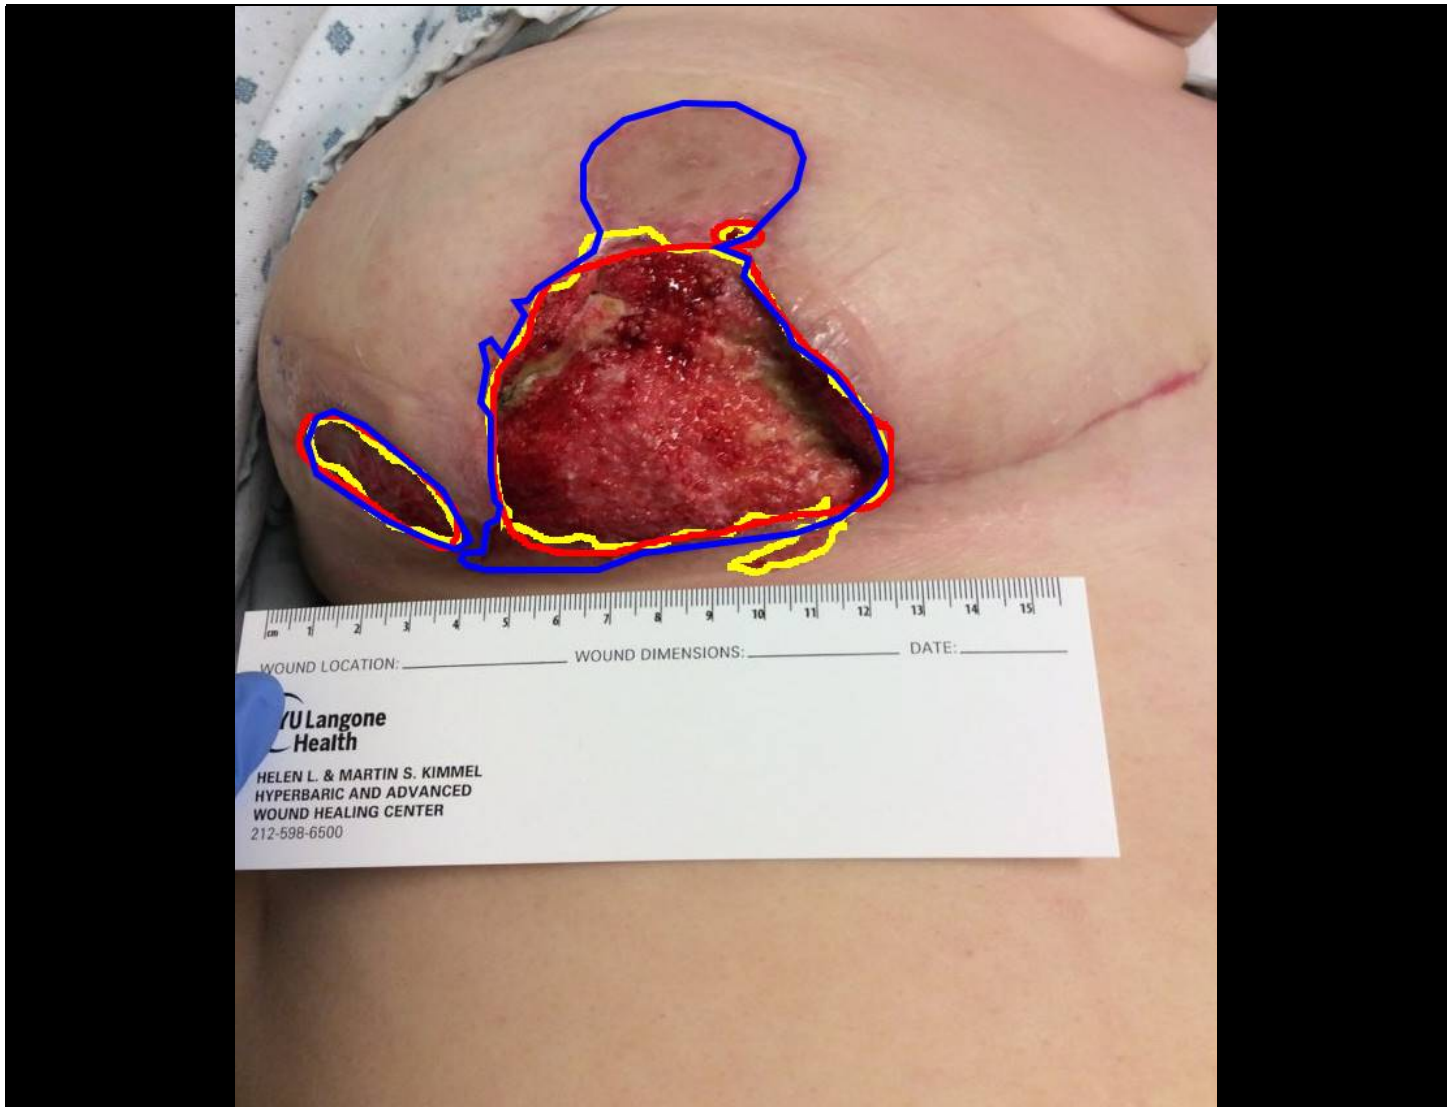

| Tracing Data |                               |                           |                               |
|--------------|-------------------------------|---------------------------|-------------------------------|
| Tracer:      | Wound Area (px <sup>2</sup> ) | Ruler Calibration (px/cm) | Wound Area (cm <sup>2</sup> ) |
| H1           | 58778                         | 39.0                      | 38.70                         |
| H2           | 59486                         | 38.8                      | 39.51                         |
| AI           | 78633                         | 41.4                      | 45.80                         |

| Tracing Comparisons     |                     |                     |                     |                     |
|-------------------------|---------------------|---------------------|---------------------|---------------------|
| Difference Metric:      | Human-Human         |                     | Human-AI            |                     |
|                         | H1(ref)<br>H2(test) | H2(ref)<br>H1(test) | H1(ref)<br>AI(test) | H2(ref)<br>AI(test) |
| False Negative Area (%) | 5.1                 | 6.2                 | 3.0                 | 2.6                 |
| False Positive Area (%) | 6.3                 | 5.0                 | 36.8                | 34.8                |
| Relative Error (%)      | 1.2                 | 1.2                 | 33.8                | 32.2                |

| Blinded Attending Surgeon Review |              |                      |                      |                      |              |                         |
|----------------------------------|--------------|----------------------|----------------------|----------------------|--------------|-------------------------|
| Reviewer                         | PGT Estimate | H1 meets definition? | H2 meets definition? | AI meets definition? | Which is AI? | Which is most accurate? |
| 1                                | 90           | Yes                  | Yes                  | No                   | H1           | AI                      |
| 2                                | 100          | Yes                  | Yes                  | Yes                  | AI           | H2                      |
| 3                                | 70           | Yes                  | No                   | No                   | H1           | H2                      |

| Wound EMR Information |        |     |            |                |                   |                  |                  |                               |
|-----------------------|--------|-----|------------|----------------|-------------------|------------------|------------------|-------------------------------|
| Sequential Number     | Gender | Age | Wound Type | Wound Location | Wound Length (cm) | Wound Width (cm) | Wound Depth (cm) | Wound Area (cm <sup>2</sup> ) |
| 4                     | M      | 59  | Surgical   | Back           | 4.0               |                  |                  |                               |

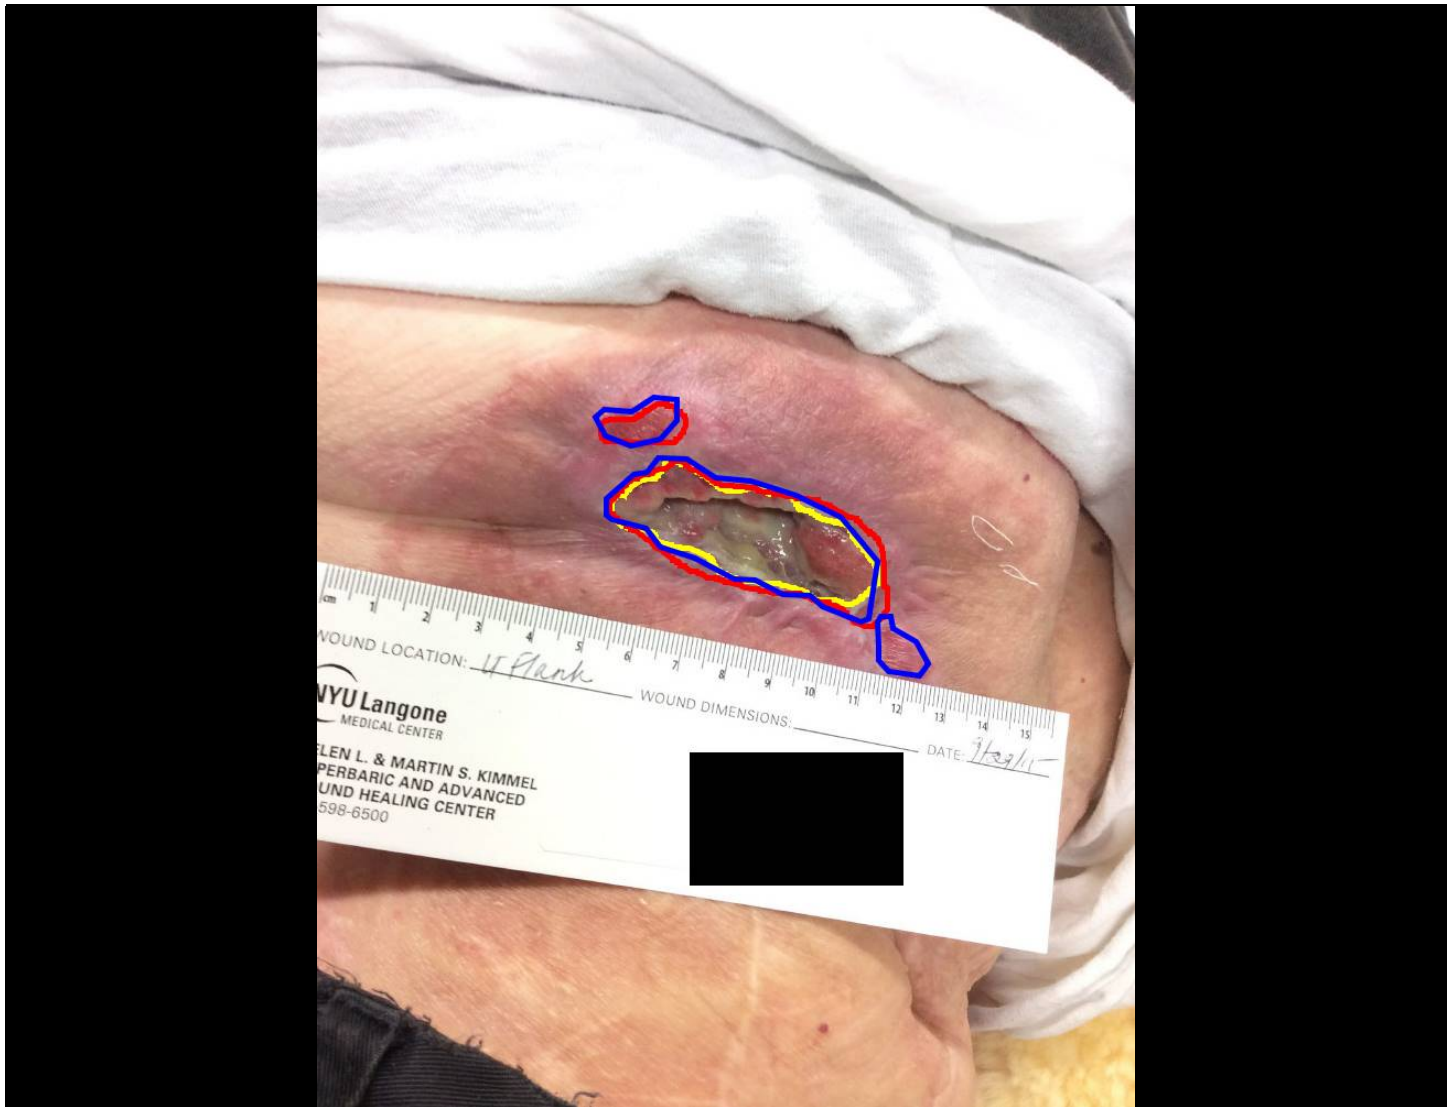

| Tracing Data |                               |                           |                               |
|--------------|-------------------------------|---------------------------|-------------------------------|
| Tracer:      | Wound Area (px <sup>2</sup> ) | Ruler Calibration (px/cm) | Wound Area (cm <sup>2</sup> ) |
| H1           | 16050                         | 42.7                      | 8.80                          |
| H2           | 21964                         | 50.1                      | 8.76                          |
| AI           | 22408                         | 38.3                      | 15.30                         |

| Tracing Comparisons     |                     |                     |                     |                     |
|-------------------------|---------------------|---------------------|---------------------|---------------------|
| Difference Metric:      | Human-Human         |                     | Human-AI            |                     |
|                         | H1(ref)<br>H2(test) | H2(ref)<br>H1(test) | H1(ref)<br>AI(test) | H2(ref)<br>AI(test) |
| False Negative Area (%) | 0.7                 | 27.5                | 0.8                 | 12.2                |
| False Positive Area (%) | 37.6                | 0.5                 | 40.4                | 14.2                |
| Relative Error (%)      | 36.8                | 26.9                | 39.6                | 2.0                 |

| Blinded Attending Surgeon Review |              |                      |                      |                      |              |                         |
|----------------------------------|--------------|----------------------|----------------------|----------------------|--------------|-------------------------|
| Reviewer                         | PGT Estimate | H1 meets definition? | H2 meets definition? | AI meets definition? | Which is AI? | Which is most accurate? |
| 1                                | 10           | No                   | Yes                  | No                   | H2           | H2                      |
| 2                                | 20           | Yes                  | Yes                  | Yes                  | H2           | AI                      |
| 3                                | 20           | Yes                  | No                   | No                   | H1           | H2                      |

| Wound EMR Information |        |     |            |                |                   |                  |                  |                               |
|-----------------------|--------|-----|------------|----------------|-------------------|------------------|------------------|-------------------------------|
| Sequential Number     | Gender | Age | Wound Type | Wound Location | Wound Length (cm) | Wound Width (cm) | Wound Depth (cm) | Wound Area (cm <sup>2</sup> ) |
| 5                     | F      | 93  | Traumatic  | Knee           |                   |                  |                  |                               |

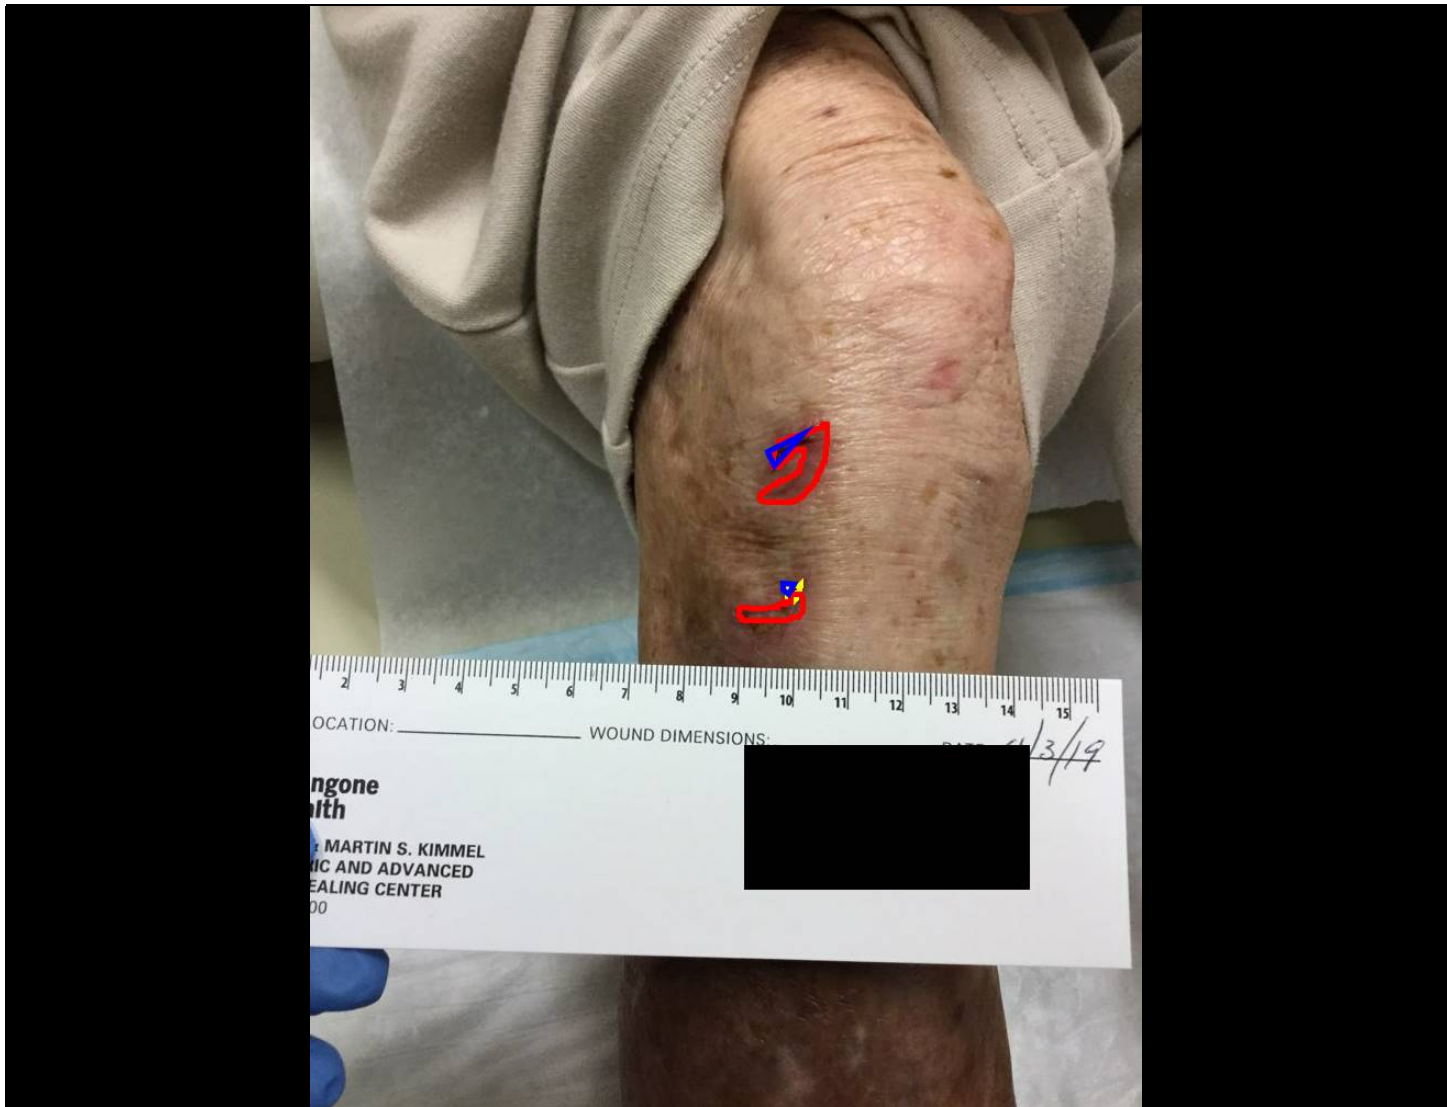

| Tracing Data |                               |                           |                               |
|--------------|-------------------------------|---------------------------|-------------------------------|
| Tracer:      | Wound Area (px <sup>2</sup> ) | Ruler Calibration (px/cm) | Wound Area (cm <sup>2</sup> ) |
| H1           | 121                           | 50.7                      | 0.05                          |
| H2           | 2932                          | 57.1                      | 0.90                          |
| AI           | 308                           | 39.2                      | 0.20                          |

| Tracing Comparisons     |                     |                     |                     |                     |
|-------------------------|---------------------|---------------------|---------------------|---------------------|
| Difference Metric:      | Human-Human         |                     | Human-AI            |                     |
|                         | H1(ref)<br>H2(test) | H2(ref)<br>H1(test) | H1(ref)<br>AI(test) | H2(ref)<br>AI(test) |
| False Negative Area (%) | 76.0                | 99.0                | 81.0                | 92.4                |
| False Positive Area (%) | 2399.2              | 3.1                 | 235.5               | 2.9                 |
| Relative Error (%)      | 2323.1              | 95.9                | 154.5               | 89.5                |

| Blinded Attending Surgeon Review |              |                      |                      |                      |              |                         |
|----------------------------------|--------------|----------------------|----------------------|----------------------|--------------|-------------------------|
| Reviewer                         | PGT Estimate | H1 meets definition? | H2 meets definition? | AI meets definition? | Which is AI? | Which is most accurate? |
| 1                                | 80           | No                   | Yes                  | No                   | H2           | H1                      |
| 2                                | 90           | No                   | Yes                  | No                   | H1           | H1                      |
| 3                                | 100          | No                   | No                   | No                   | H1           | H1                      |

| Wound EMR Information |        |     |            |                |                   |                  |                  |                               |
|-----------------------|--------|-----|------------|----------------|-------------------|------------------|------------------|-------------------------------|
| Sequential Number     | Gender | Age | Wound Type | Wound Location | Wound Length (cm) | Wound Width (cm) | Wound Depth (cm) | Wound Area (cm <sup>2</sup> ) |
| 6                     | F      | 85  | Traumatic  | Leg            | 1.8               | 0.8              | 0.1              | 1.44                          |

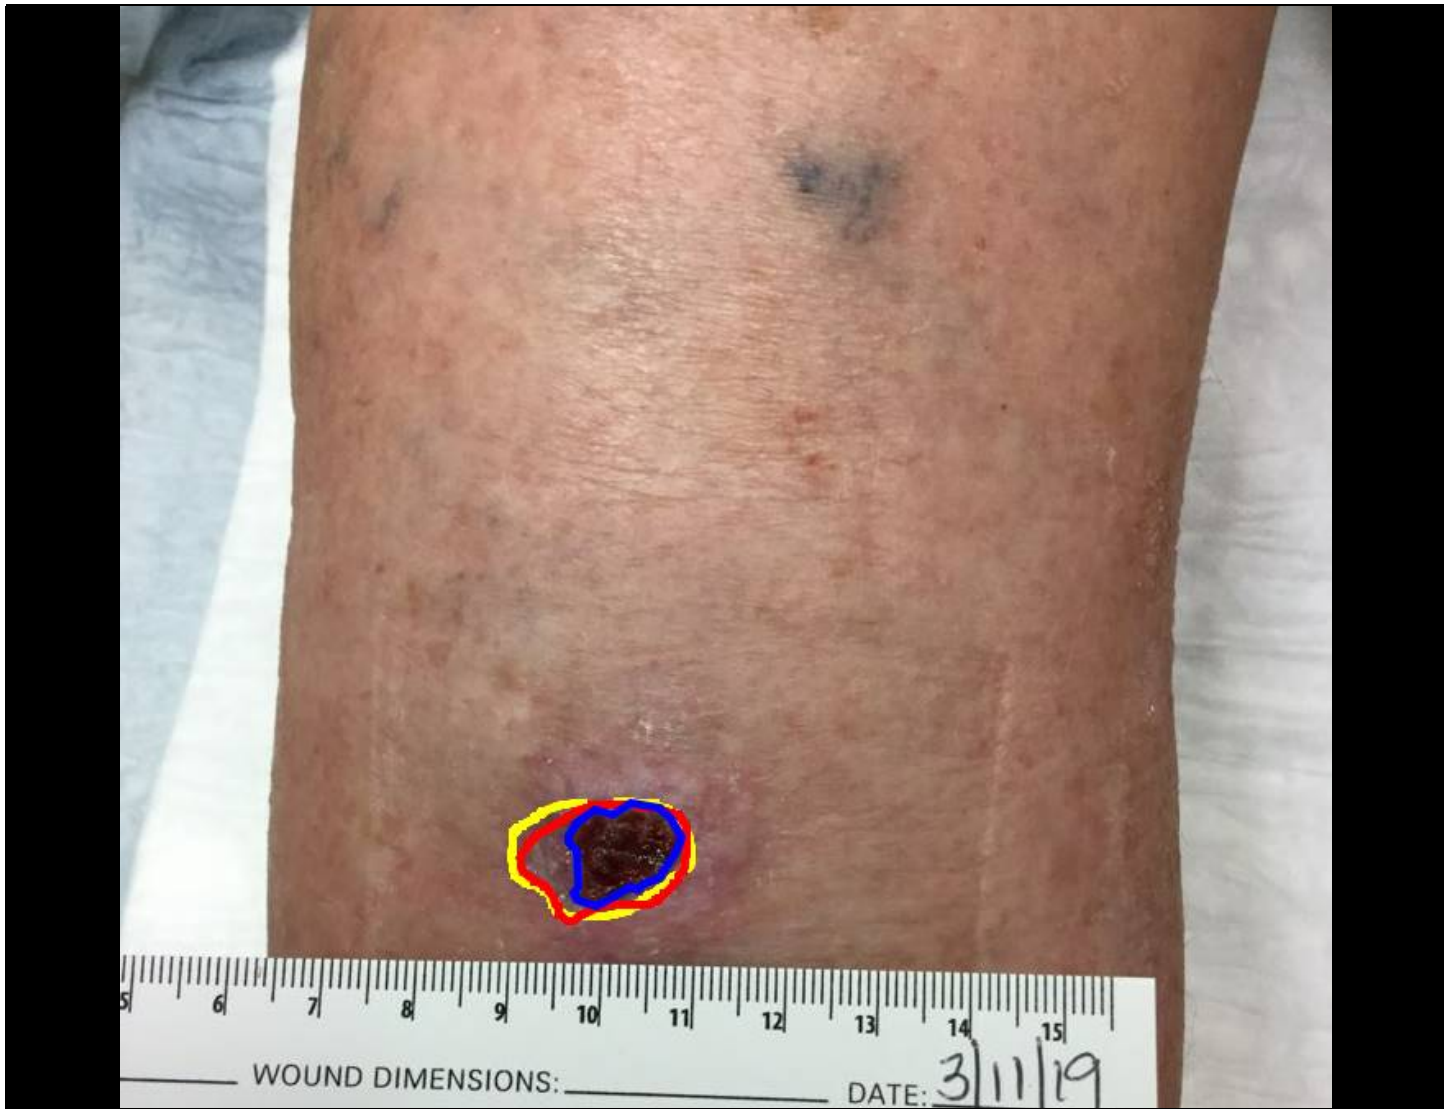

| Tracing Data |                               |                           |                               |
|--------------|-------------------------------|---------------------------|-------------------------------|
| Tracer:      | Wound Area (px <sup>2</sup> ) | Ruler Calibration (px/cm) | Wound Area (cm <sup>2</sup> ) |
| H1           | 5886                          | 56.7                      | 1.83                          |
| H2           | 5153                          | 58.2                      | 1.52                          |
| AI           | 2929                          | 57.0                      | 0.90                          |

| Tracing Comparisons     |                     |                     |                     |                     |
|-------------------------|---------------------|---------------------|---------------------|---------------------|
| Difference Metric:      | Human-Human         |                     | Human-AI            |                     |
|                         | H1(ref)<br>H2(test) | H2(ref)<br>H1(test) | H1(ref)<br>AI(test) | H2(ref)<br>AI(test) |
| False Negative Area (%) | 15.4                | 3.4                 | 50.2                | 43.3                |
| False Positive Area (%) | 3.0                 | 17.6                | 0.0                 | 0.2                 |
| Relative Error (%)      | 12.5                | 14.2                | 50.2                | 43.2                |

| Blinded Attending Surgeon Review |              |                      |                      |                      |              |                         |
|----------------------------------|--------------|----------------------|----------------------|----------------------|--------------|-------------------------|
| Reviewer                         | PGT Estimate | H1 meets definition? | H2 meets definition? | AI meets definition? | Which is AI? | Which is most accurate? |
| 1                                | 60           | Yes                  | Yes                  | No                   | H1           | AI                      |
| 2                                | 100          | Yes                  | Yes                  | No                   | AI           | AI                      |
| 3                                | 30           | No                   | No                   | Yes                  | H2           | AI                      |

| Wound EMR Information |        |     |            |                |                   |                  |                  |                               |
|-----------------------|--------|-----|------------|----------------|-------------------|------------------|------------------|-------------------------------|
| Sequential Number     | Gender | Age | Wound Type | Wound Location | Wound Length (cm) | Wound Width (cm) | Wound Depth (cm) | Wound Area (cm <sup>2</sup> ) |
| 7                     | F      | 64  | Pressure   | Right ischium  |                   |                  |                  |                               |

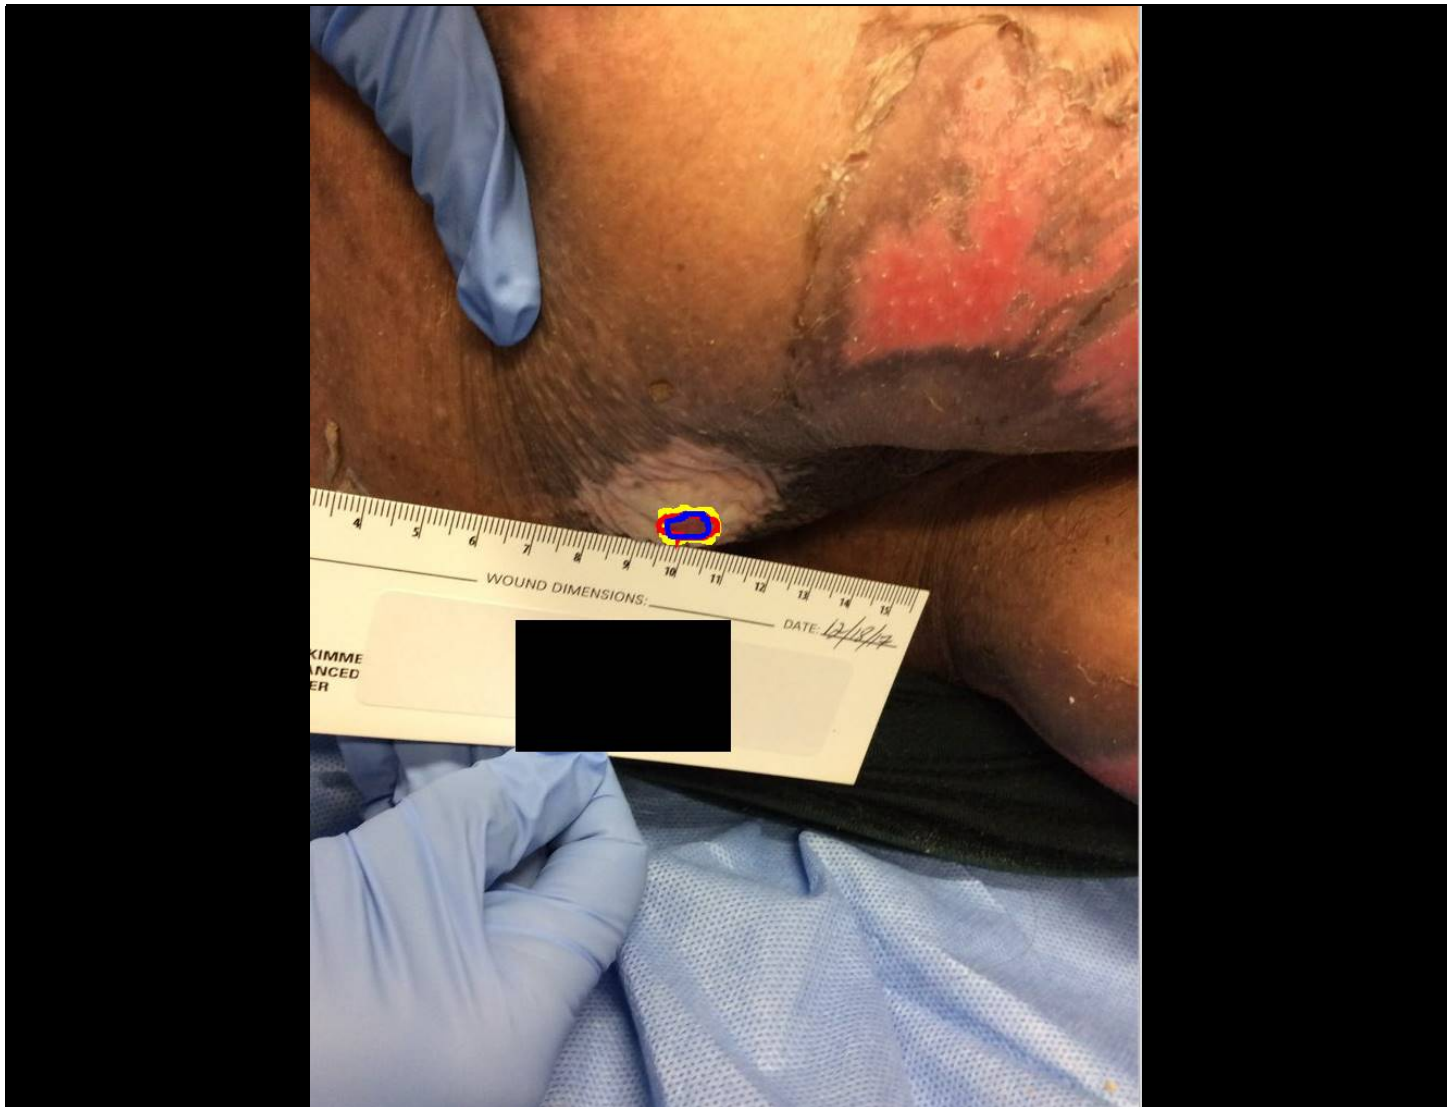

| Tracing Data |                               |                           |                               |
|--------------|-------------------------------|---------------------------|-------------------------------|
| Tracer:      | Wound Area (px <sup>2</sup> ) | Ruler Calibration (px/cm) | Wound Area (cm <sup>2</sup> ) |
| H1           | 1370                          | 44.3                      | 0.70                          |
| H2           | 891                           | 44.5                      | 0.45                          |
| AI           | 668                           | 47.2                      | 0.30                          |

| Tracing Comparisons     |                     |                     |                     |                     |
|-------------------------|---------------------|---------------------|---------------------|---------------------|
| Difference Metric:      | Human-Human         |                     | Human-AI            |                     |
|                         | H1(ref)<br>H2(test) | H2(ref)<br>H1(test) | H1(ref)<br>AI(test) | H2(ref)<br>AI(test) |
| False Negative Area (%) | 36.1                | 1.8                 | 51.4                | 28.7                |
| False Positive Area (%) | 1.2                 | 55.6                | 0.1                 | 3.7                 |
| Relative Error (%)      | 35.0                | 53.8                | 51.2                | 25.0                |

| Blinded Attending Surgeon Review |              |                      |                      |                      |              |                         |
|----------------------------------|--------------|----------------------|----------------------|----------------------|--------------|-------------------------|
| Reviewer                         | PGT Estimate | H1 meets definition? | H2 meets definition? | AI meets definition? | Which is AI? | Which is most accurate? |
| 1                                | 100          | Yes                  | Yes                  | Yes                  | H2           | H1                      |
| 2                                | 100          | Yes                  | Yes                  | Yes                  | AI           | H2                      |
| 3                                | 100          | Yes                  | No                   | No                   | AI           | H2                      |

| Wound EMR Information |        |     |            |                |                   |                  |                  |                               |
|-----------------------|--------|-----|------------|----------------|-------------------|------------------|------------------|-------------------------------|
| Sequential Number     | Gender | Age | Wound Type | Wound Location | Wound Length (cm) | Wound Width (cm) | Wound Depth (cm) | Wound Area (cm <sup>2</sup> ) |
| 8                     | F      | 65  | Traumatic  | leg            | 3.5               | 1.5              | 0.2              | 5.25                          |

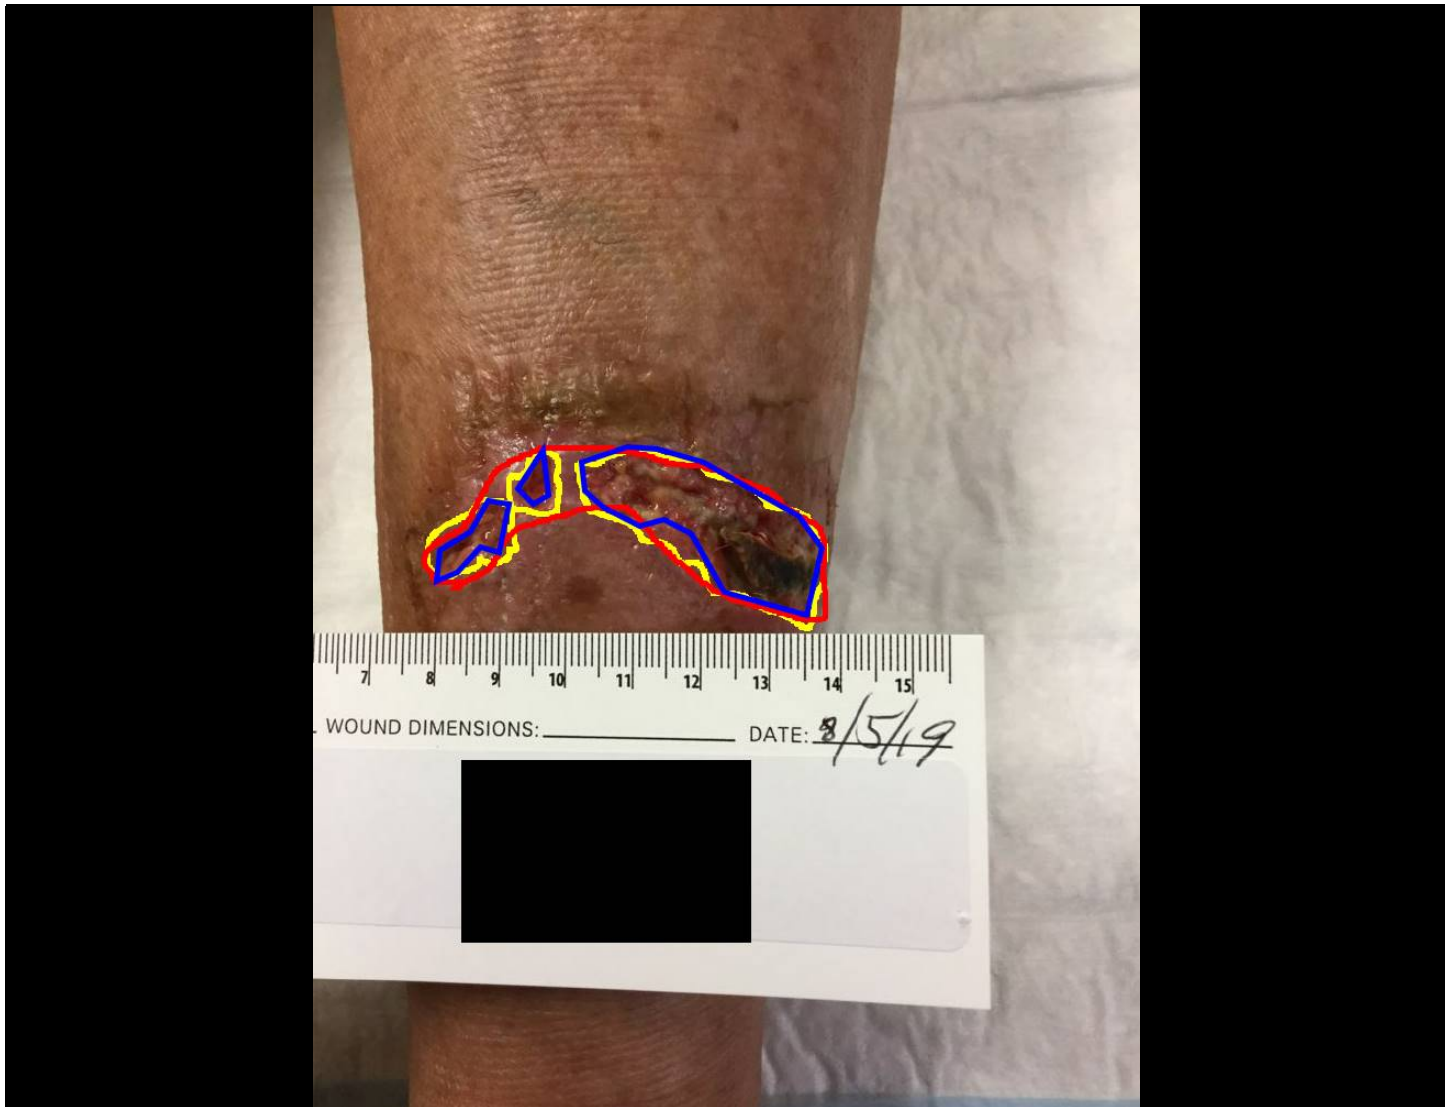

| Tracing Data |                               |                           |                               |
|--------------|-------------------------------|---------------------------|-------------------------------|
| Tracer:      | Wound Area (px <sup>2</sup> ) | Ruler Calibration (px/cm) | Wound Area (cm <sup>2</sup> ) |
| H1           | 24211                         | 60.7                      | 6.56                          |
| H2           | 27251                         | 50.7                      | 10.61                         |
| AI           | 18843                         | 60.2                      | 5.20                          |

| Tracing Comparisons     |                     |                     |                     |                     |
|-------------------------|---------------------|---------------------|---------------------|---------------------|
| Difference Metric:      | Human-Human         |                     | Human-AI            |                     |
|                         | H1(ref)<br>H2(test) | H2(ref)<br>H1(test) | H1(ref)<br>AI(test) | H2(ref)<br>AI(test) |
| False Negative Area (%) | 6.7                 | 17.1                | 24.4                | 33.6                |
| False Positive Area (%) | 19.3                | 6.0                 | 2.3                 | 2.7                 |
| Relative Error (%)      | 12.6                | 11.2                | 22.2                | 30.9                |

| Blinded Attending Surgeon Review |              |                      |                      |                      |              |                         |
|----------------------------------|--------------|----------------------|----------------------|----------------------|--------------|-------------------------|
| Reviewer                         | PGT Estimate | H1 meets definition? | H2 meets definition? | AI meets definition? | Which is AI? | Which is most accurate? |
| 1                                | 70           | Yes                  | No                   | Yes                  | H1           | AI                      |
| 2                                | 60           | Yes                  | Yes                  | Yes                  | AI           | AI                      |
| 3                                | 60           | No                   | No                   | No                   | AI           | H2                      |



| Wound EMR Information |        |     |            |                |                   |                  |                  |                               |
|-----------------------|--------|-----|------------|----------------|-------------------|------------------|------------------|-------------------------------|
| Sequential Number     | Gender | Age | Wound Type | Wound Location | Wound Length (cm) | Wound Width (cm) | Wound Depth (cm) | Wound Area (cm <sup>2</sup> ) |
| 10                    | F      | 62  | Venous     | Ankle          | 4.0               | 5.0              | 3.5              | 20.00                         |

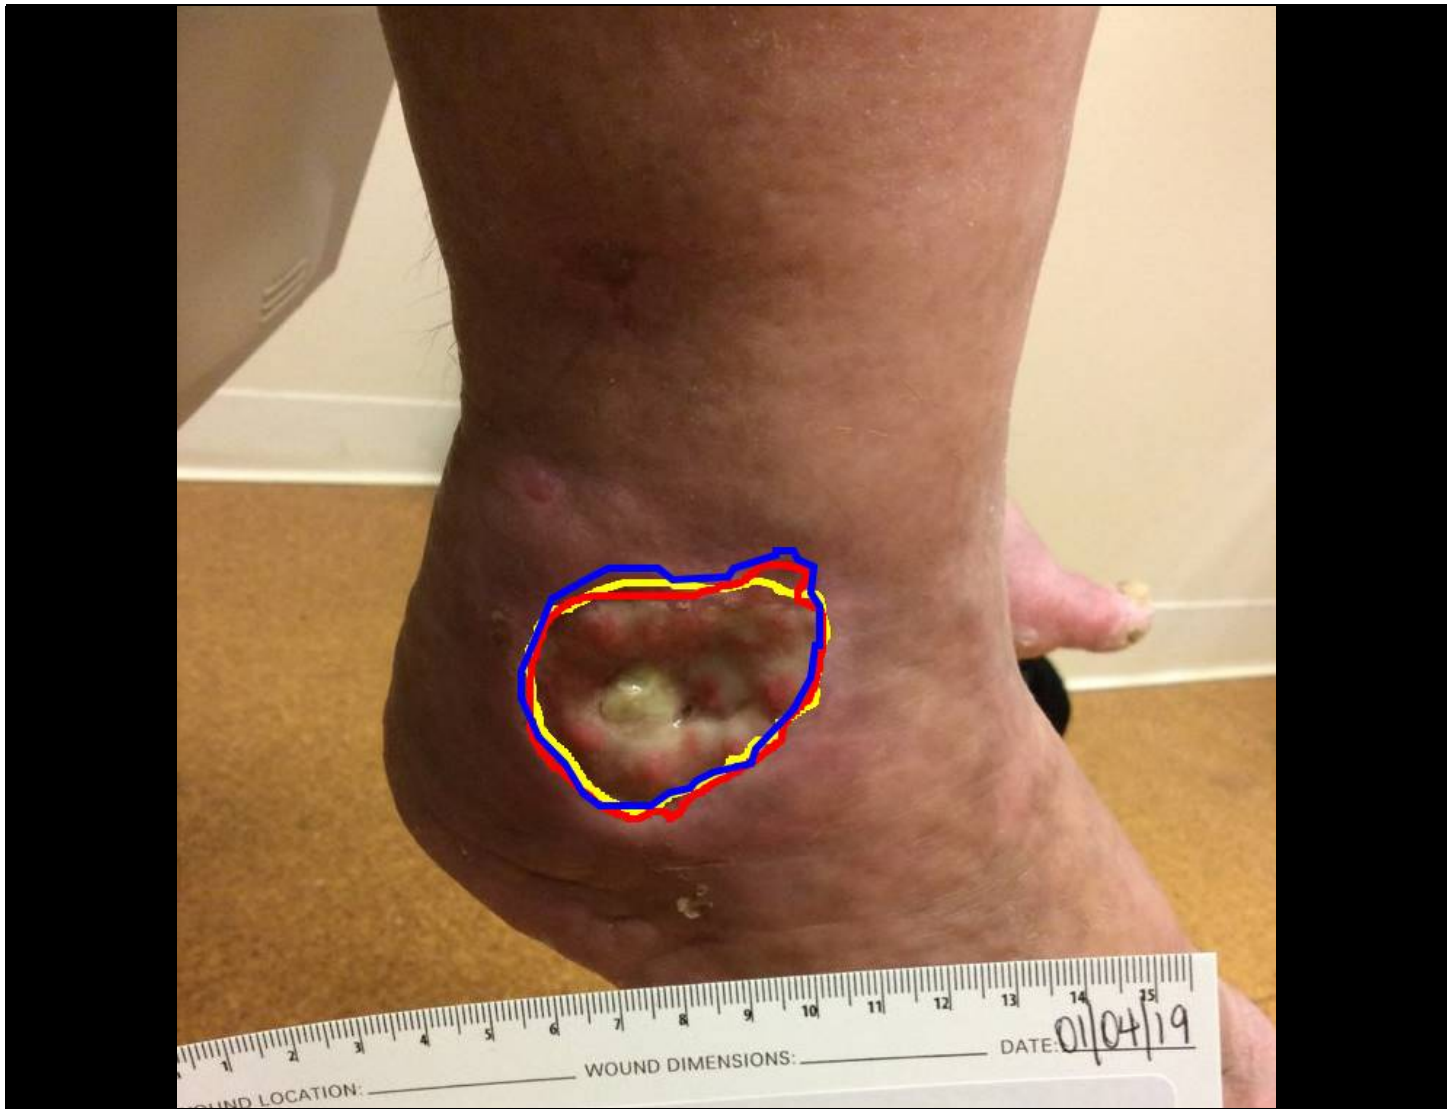

| Tracing Data |                               |                           |                               |
|--------------|-------------------------------|---------------------------|-------------------------------|
| Tracer:      | Wound Area (px <sup>2</sup> ) | Ruler Calibration (px/cm) | Wound Area (cm <sup>2</sup> ) |
| H1           | 23714                         | 45.2                      | 11.62                         |
| H2           | 24879                         | 45.4                      | 12.08                         |
| AI           | 26127                         | 44.8                      | 13.00                         |

| Tracing Comparisons     |                     |                     |                     |                     |
|-------------------------|---------------------|---------------------|---------------------|---------------------|
| Difference Metric:      | Human-Human         |                     | Human-AI            |                     |
|                         | H1(ref)<br>H2(test) | H2(ref)<br>H1(test) | H1(ref)<br>AI(test) | H2(ref)<br>AI(test) |
| False Negative Area (%) | 4.0                 | 8.5                 | 2.2                 | 5.2                 |
| False Positive Area (%) | 8.9                 | 3.8                 | 12.3                | 10.3                |
| Relative Error (%)      | 4.9                 | 4.7                 | 10.2                | 5.0                 |

| Blinded Attending Surgeon Review |              |                      |                      |                      |              |                         |
|----------------------------------|--------------|----------------------|----------------------|----------------------|--------------|-------------------------|
| Reviewer                         | PGT Estimate | H1 meets definition? | H2 meets definition? | AI meets definition? | Which is AI? | Which is most accurate? |
| 1                                | 30           | Yes                  | Yes                  | Yes                  | H1           | H2                      |
| 2                                | 50           | Yes                  | Yes                  | Yes                  | AI           | H2                      |
| 3                                | 50           | No                   | Yes                  | No                   | H2           | H1                      |

| Wound EMR Information |        |     |            |                |                   |                  |                  |                               |
|-----------------------|--------|-----|------------|----------------|-------------------|------------------|------------------|-------------------------------|
| Sequential Number     | Gender | Age | Wound Type | Wound Location | Wound Length (cm) | Wound Width (cm) | Wound Depth (cm) | Wound Area (cm <sup>2</sup> ) |
| 11                    | F      | 33  | Diabetic   | Toe            |                   |                  |                  |                               |

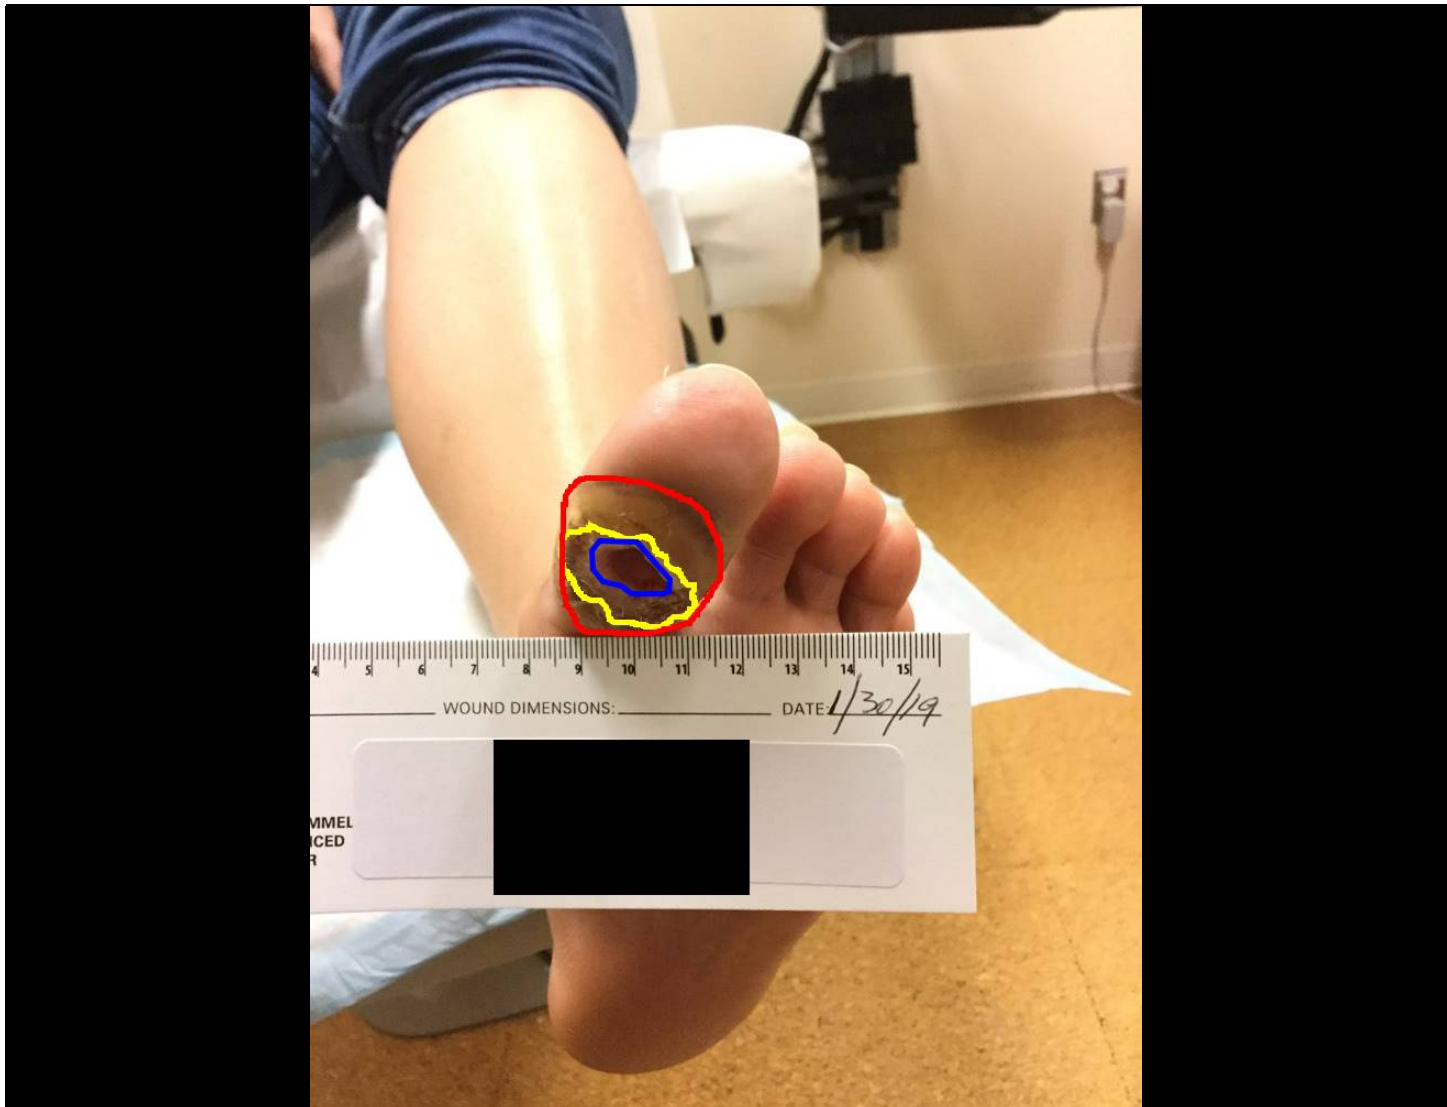

| Tracing Data |                               |                           |                               |
|--------------|-------------------------------|---------------------------|-------------------------------|
| Tracer:      | Wound Area (px <sup>2</sup> ) | Ruler Calibration (px/cm) | Wound Area (cm <sup>2</sup> ) |
| H1           | 7269                          | 48.0                      | 3.15                          |
| H2           | 17152                         | 49.2                      | 7.09                          |
| AI           | 2422                          | 51.9                      | 0.90                          |

| Tracing Comparisons     |                     |                     |                     |                     |
|-------------------------|---------------------|---------------------|---------------------|---------------------|
| Difference Metric:      | Human-Human         |                     | Human-AI            |                     |
|                         | H1(ref)<br>H2(test) | H2(ref)<br>H1(test) | H1(ref)<br>AI(test) | H2(ref)<br>AI(test) |
| False Negative Area (%) | 0.2                 | 57.7                | 66.7                | 85.9                |
| False Positive Area (%) | 136.1               | 0.1                 | 0.0                 | 0.0                 |
| Relative Error (%)      | 136.0               | 57.6                | 66.7                | 85.9                |

| Blinded Attending Surgeon Review |              |                      |                      |                      |              |                         |
|----------------------------------|--------------|----------------------|----------------------|----------------------|--------------|-------------------------|
| Reviewer                         | PGT Estimate | H1 meets definition? | H2 meets definition? | AI meets definition? | Which is AI? | Which is most accurate? |
| 1                                | 90           | No                   | No                   | Yes                  | H1           | H1                      |
| 2                                | 50           | Yes                  | No                   | Yes                  | H2           | H1                      |
| 3                                | 100          | No                   | No                   | Yes                  | H1           | AI                      |

| Wound EMR Information |        |     |            |                |                   |                  |                  |                               |
|-----------------------|--------|-----|------------|----------------|-------------------|------------------|------------------|-------------------------------|
| Sequential Number     | Gender | Age | Wound Type | Wound Location | Wound Length (cm) | Wound Width (cm) | Wound Depth (cm) | Wound Area (cm <sup>2</sup> ) |
| 12                    | M      | 81  | Pressure   | Ankle          |                   |                  |                  |                               |

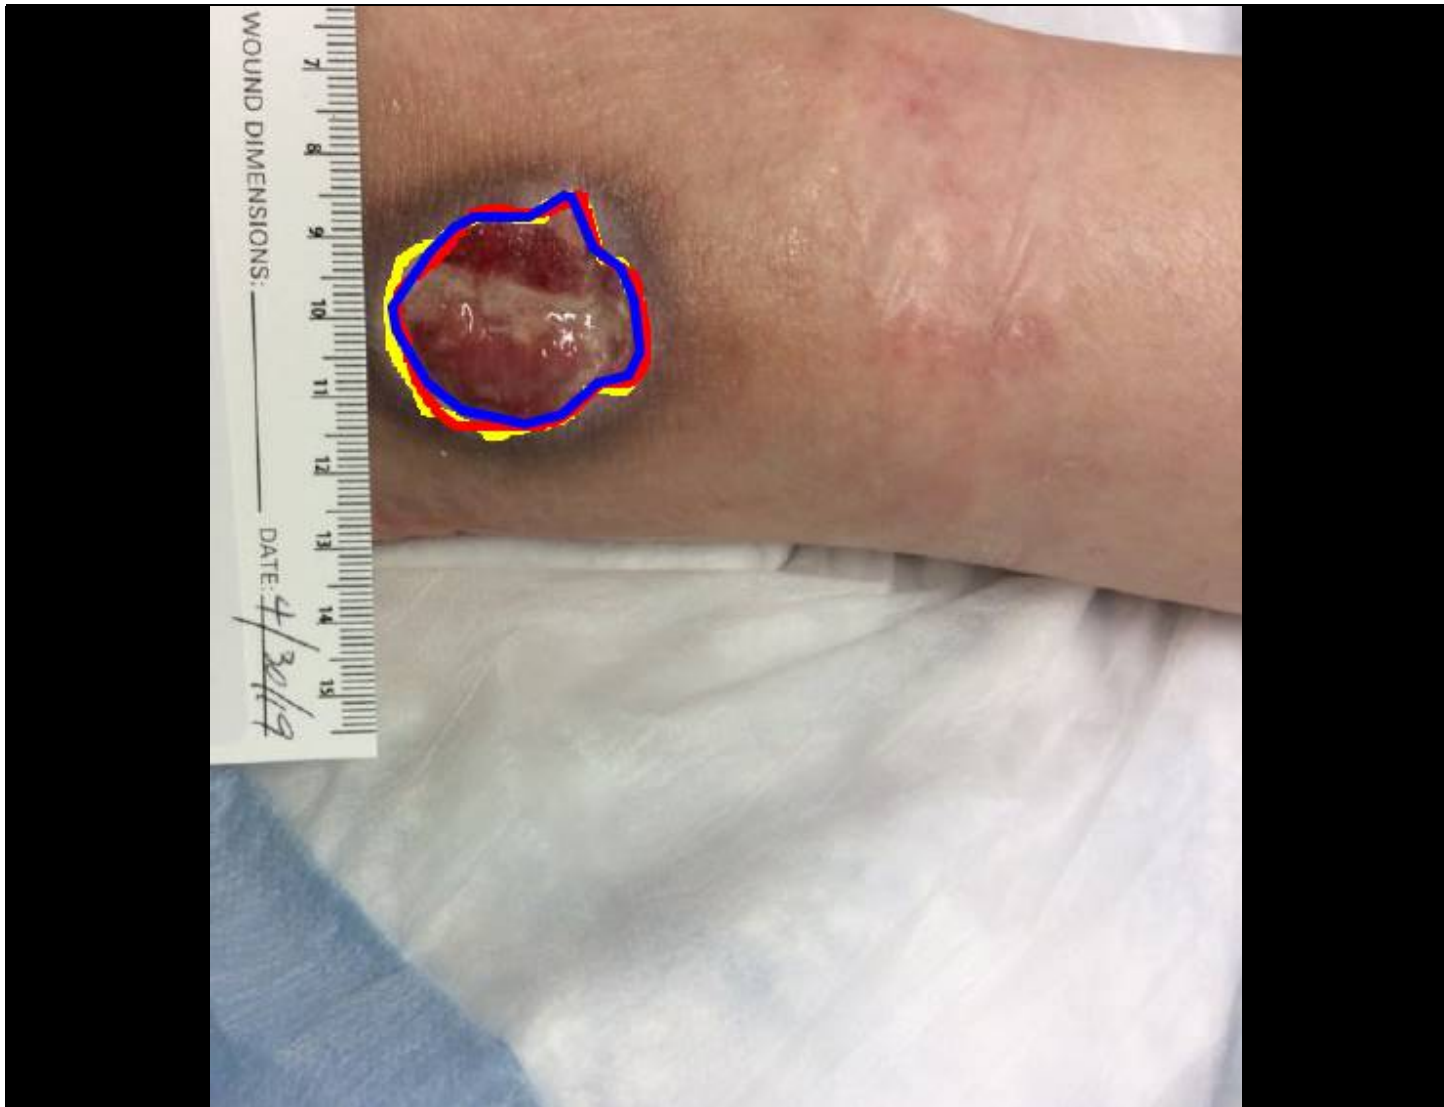

| Tracing Data |                               |                           |                               |
|--------------|-------------------------------|---------------------------|-------------------------------|
| Tracer:      | Wound Area (px <sup>2</sup> ) | Ruler Calibration (px/cm) | Wound Area (cm <sup>2</sup> ) |
| H1           | 11455                         | 41.7                      | 6.59                          |
| H2           | 10924                         | 43.0                      | 5.90                          |
| AI           | 10207                         | 36.9                      | 7.50                          |

| Tracing Comparisons     |                     |                     |                     |                     |
|-------------------------|---------------------|---------------------|---------------------|---------------------|
| Difference Metric:      | Human-Human         |                     | Human-AI            |                     |
|                         | H1(ref)<br>H2(test) | H2(ref)<br>H1(test) | H1(ref)<br>AI(test) | H2(ref)<br>AI(test) |
| False Negative Area (%) | 7.0                 | 2.5                 | 11.2                | 8.2                 |
| False Positive Area (%) | 2.4                 | 7.4                 | 0.3                 | 1.7                 |
| Relative Error (%)      | 4.6                 | 4.9                 | 10.9                | 6.6                 |

| Blinded Attending Surgeon Review |              |                      |                      |                      |              |                         |
|----------------------------------|--------------|----------------------|----------------------|----------------------|--------------|-------------------------|
| Reviewer                         | PGT Estimate | H1 meets definition? | H2 meets definition? | AI meets definition? | Which is AI? | Which is most accurate? |
| 1                                | 100          | Yes                  | Yes                  | Yes                  | H1           | H2                      |
| 2                                | 80           | Yes                  | Yes                  | Yes                  | H2           | AI                      |
| 3                                | 80           | No                   | No                   | Yes                  | H2           | AI                      |

| Wound EMR Information |        |     |            |                |                   |                  |                  |                               |
|-----------------------|--------|-----|------------|----------------|-------------------|------------------|------------------|-------------------------------|
| Sequential Number     | Gender | Age | Wound Type | Wound Location | Wound Length (cm) | Wound Width (cm) | Wound Depth (cm) | Wound Area (cm <sup>2</sup> ) |
| 13                    | F      | 83  | Traumatic  | Left anterior  |                   |                  |                  |                               |

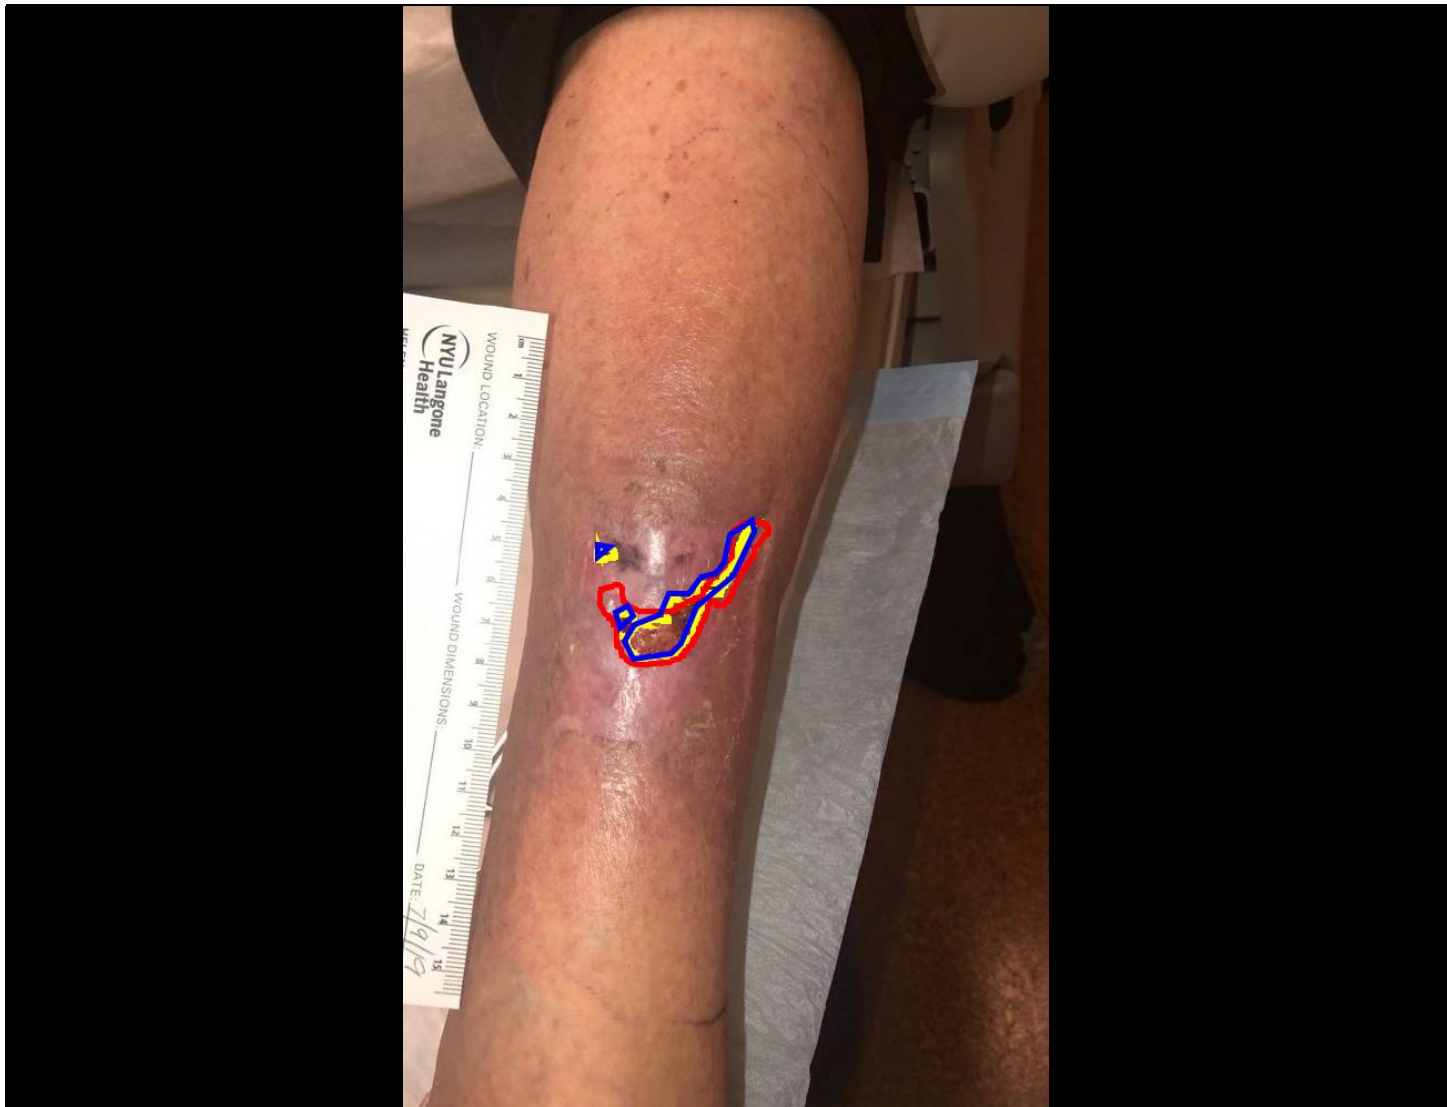

| Tracing Data |                               |                           |                               |
|--------------|-------------------------------|---------------------------|-------------------------------|
| Tracer:      | Wound Area (px <sup>2</sup> ) | Ruler Calibration (px/cm) | Wound Area (cm <sup>2</sup> ) |
| H1           | 3147                          | 37.2                      | 2.28                          |
| H2           | 5711                          | 35.7                      | 4.47                          |
| AI           | 3741                          | 40.3                      | 2.30                          |

| Tracing Comparisons     |                     |                     |                     |                     |
|-------------------------|---------------------|---------------------|---------------------|---------------------|
| Difference Metric:      | Human-Human         |                     | Human-AI            |                     |
|                         | H1(ref)<br>H2(test) | H2(ref)<br>H1(test) | H1(ref)<br>AI(test) | H2(ref)<br>AI(test) |
| False Negative Area (%) | 9.6                 | 50.2                | 19.0                | 45.5                |
| False Positive Area (%) | 91.1                | 5.3                 | 37.8                | 11.0                |
| Relative Error (%)      | 81.5                | 44.9                | 18.9                | 34.5                |

| Blinded Attending Surgeon Review |              |                      |                      |                      |              |                         |
|----------------------------------|--------------|----------------------|----------------------|----------------------|--------------|-------------------------|
| Reviewer                         | PGT Estimate | H1 meets definition? | H2 meets definition? | AI meets definition? | Which is AI? | Which is most accurate? |
| 1                                | 90           | Yes                  | No                   | Yes                  | H1           | H2                      |
| 2                                | 70           | Yes                  | Yes                  | Yes                  | H1           | H1                      |
| 3                                | 20           | No                   | Yes                  | No                   | AI           | H1                      |

| Wound EMR Information |        |     |            |                |                   |                  |                  |                               |
|-----------------------|--------|-----|------------|----------------|-------------------|------------------|------------------|-------------------------------|
| Sequential Number     | Gender | Age | Wound Type | Wound Location | Wound Length (cm) | Wound Width (cm) | Wound Depth (cm) | Wound Area (cm <sup>2</sup> ) |
| 14                    | M      | 78  | Radiation  | Hip            | 3.0               |                  |                  |                               |

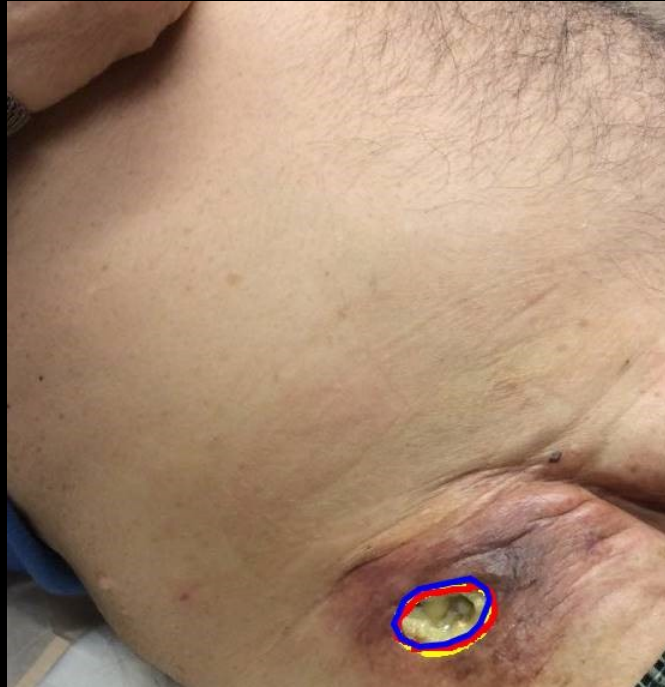

| Tracing Data |                               |                           |                               |
|--------------|-------------------------------|---------------------------|-------------------------------|
| Tracer:      | Wound Area (px <sup>2</sup> ) | Ruler Calibration (px/cm) | Wound Area (cm <sup>2</sup> ) |
| H1           | 3357                          | 29.2                      | 3.94                          |
| H2           | 3133                          | 29.3                      | 3.65                          |
| AI           | 3198                          | 29.0                      | 3.80                          |

| Tracing Comparisons     |                     |                     |                     |                     |
|-------------------------|---------------------|---------------------|---------------------|---------------------|
| Difference Metric:      | Human-Human         |                     | Human-AI            |                     |
|                         | H1(ref)<br>H2(test) | H2(ref)<br>H1(test) | H1(ref)<br>AI(test) | H2(ref)<br>AI(test) |
| False Negative Area (%) | 8.9                 | 2.4                 | 15.0                | 11.3                |
| False Positive Area (%) | 2.2                 | 9.5                 | 10.3                | 13.4                |
| Relative Error (%)      | 6.7                 | 7.1                 | 4.7                 | 2.1                 |

| Blinded Attending Surgeon Review |              |                      |                      |                      |              |                         |
|----------------------------------|--------------|----------------------|----------------------|----------------------|--------------|-------------------------|
| Reviewer                         | PGT Estimate | H1 meets definition? | H2 meets definition? | AI meets definition? | Which is AI? | Which is most accurate? |
| 1                                | 0            | Yes                  | Yes                  | Yes                  | H2           | H1                      |
| 2                                | 10           | Yes                  | Yes                  | Yes                  | AI           | AI                      |
| 3                                | 0            | Yes                  | Yes                  | Yes                  | H2           | AI                      |

| Wound EMR Information |        |     |            |                |                   |                  |                  |                               |
|-----------------------|--------|-----|------------|----------------|-------------------|------------------|------------------|-------------------------------|
| Sequential Number     | Gender | Age | Wound Type | Wound Location | Wound Length (cm) | Wound Width (cm) | Wound Depth (cm) | Wound Area (cm <sup>2</sup> ) |
| 15                    | M      | 56  | Pressure   | Buttock        |                   |                  |                  |                               |

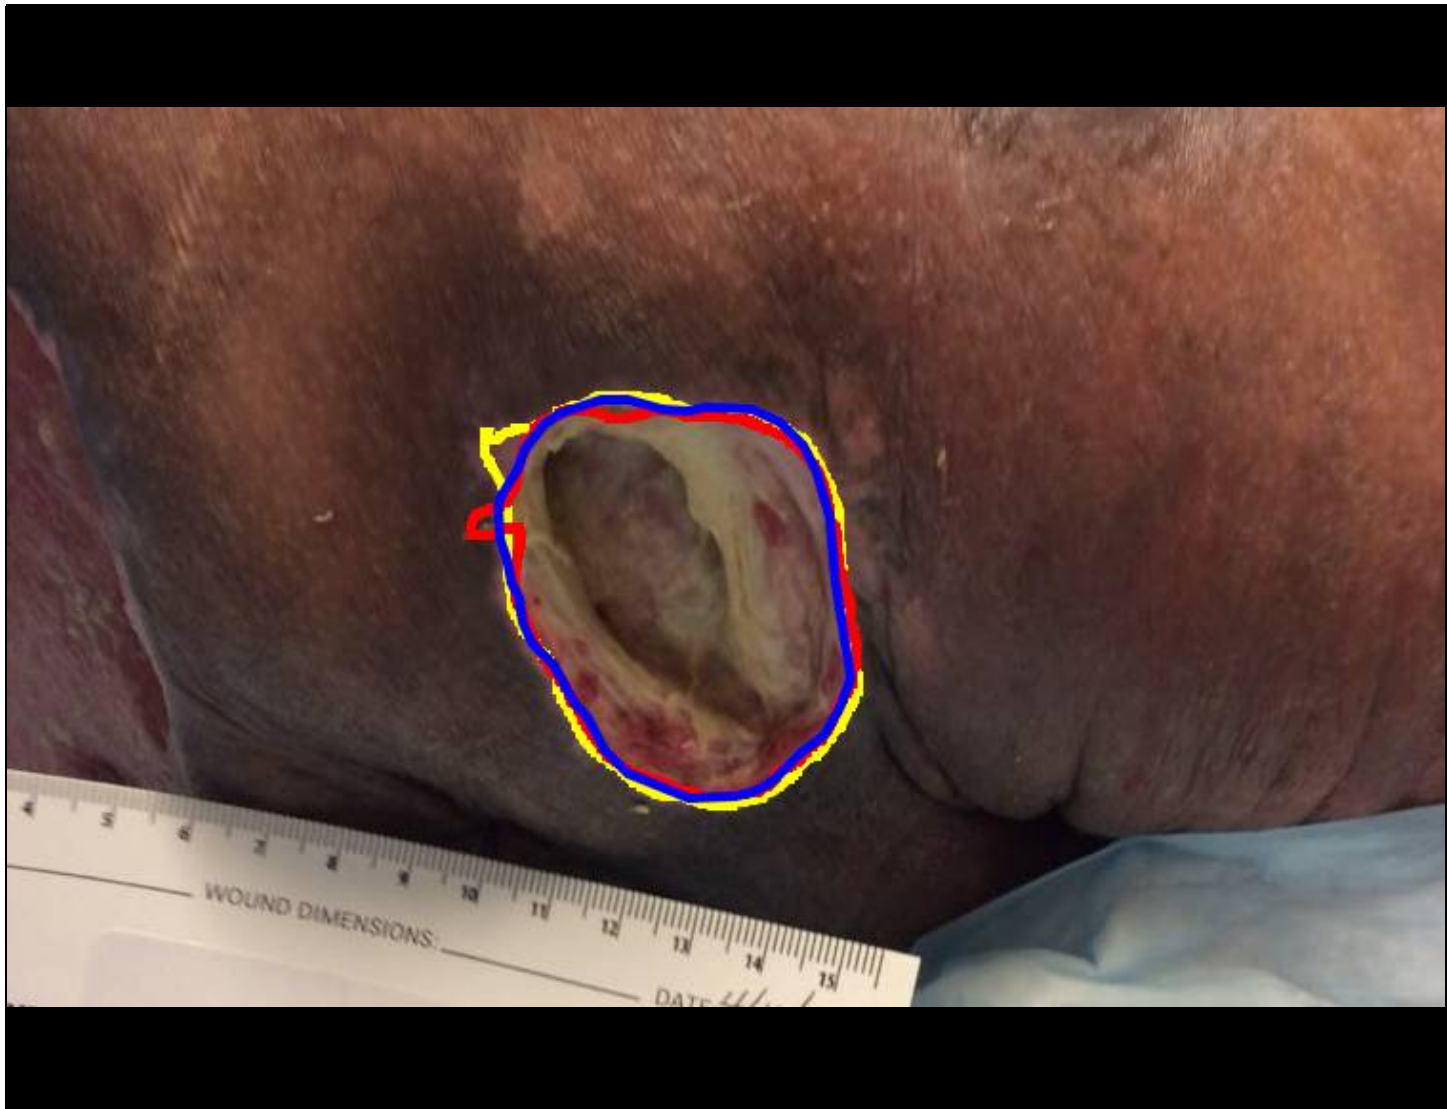

| Tracing Data |                               |                           |                               |
|--------------|-------------------------------|---------------------------|-------------------------------|
| Tracer:      | Wound Area (px <sup>2</sup> ) | Ruler Calibration (px/cm) | Wound Area (cm <sup>2</sup> ) |
| H1           | 31310                         | 38.8                      | 20.83                         |
| H2           | 29154                         | 31.9                      | 28.57                         |
| AI           | 29514                         | 40.3                      | 18.20                         |

| Tracing Comparisons     |                     |                     |                     |                     |
|-------------------------|---------------------|---------------------|---------------------|---------------------|
| Difference Metric:      | Human-Human         |                     | Human-AI            |                     |
|                         | H1(ref)<br>H2(test) | H2(ref)<br>H1(test) | H1(ref)<br>AI(test) | H2(ref)<br>AI(test) |
| False Negative Area (%) | 7.9                 | 1.1                 | 6.6                 | 2.3                 |
| False Positive Area (%) | 1.0                 | 8.5                 | 0.8                 | 3.5                 |
| Relative Error (%)      | 6.9                 | 7.4                 | 5.7                 | 1.2                 |

| Blinded Attending Surgeon Review |              |                      |                      |                      |              |                         |
|----------------------------------|--------------|----------------------|----------------------|----------------------|--------------|-------------------------|
| Reviewer                         | PGT Estimate | H1 meets definition? | H2 meets definition? | AI meets definition? | Which is AI? | Which is most accurate? |
| 1                                | 10           | Yes                  | Yes                  | Yes                  | H1           | H2                      |
| 2                                | 30           | Yes                  | Yes                  | Yes                  | H1           | AI                      |
| 3                                | 10           | Yes                  | No                   | No                   | H2           | H2                      |

| Wound EMR Information |        |     |            |                |                   |                  |                  |                               |
|-----------------------|--------|-----|------------|----------------|-------------------|------------------|------------------|-------------------------------|
| Sequential Number     | Gender | Age | Wound Type | Wound Location | Wound Length (cm) | Wound Width (cm) | Wound Depth (cm) | Wound Area (cm <sup>2</sup> ) |
| 16                    | F      | 43  | Diabetic   | Foot           | 5.0               |                  |                  |                               |

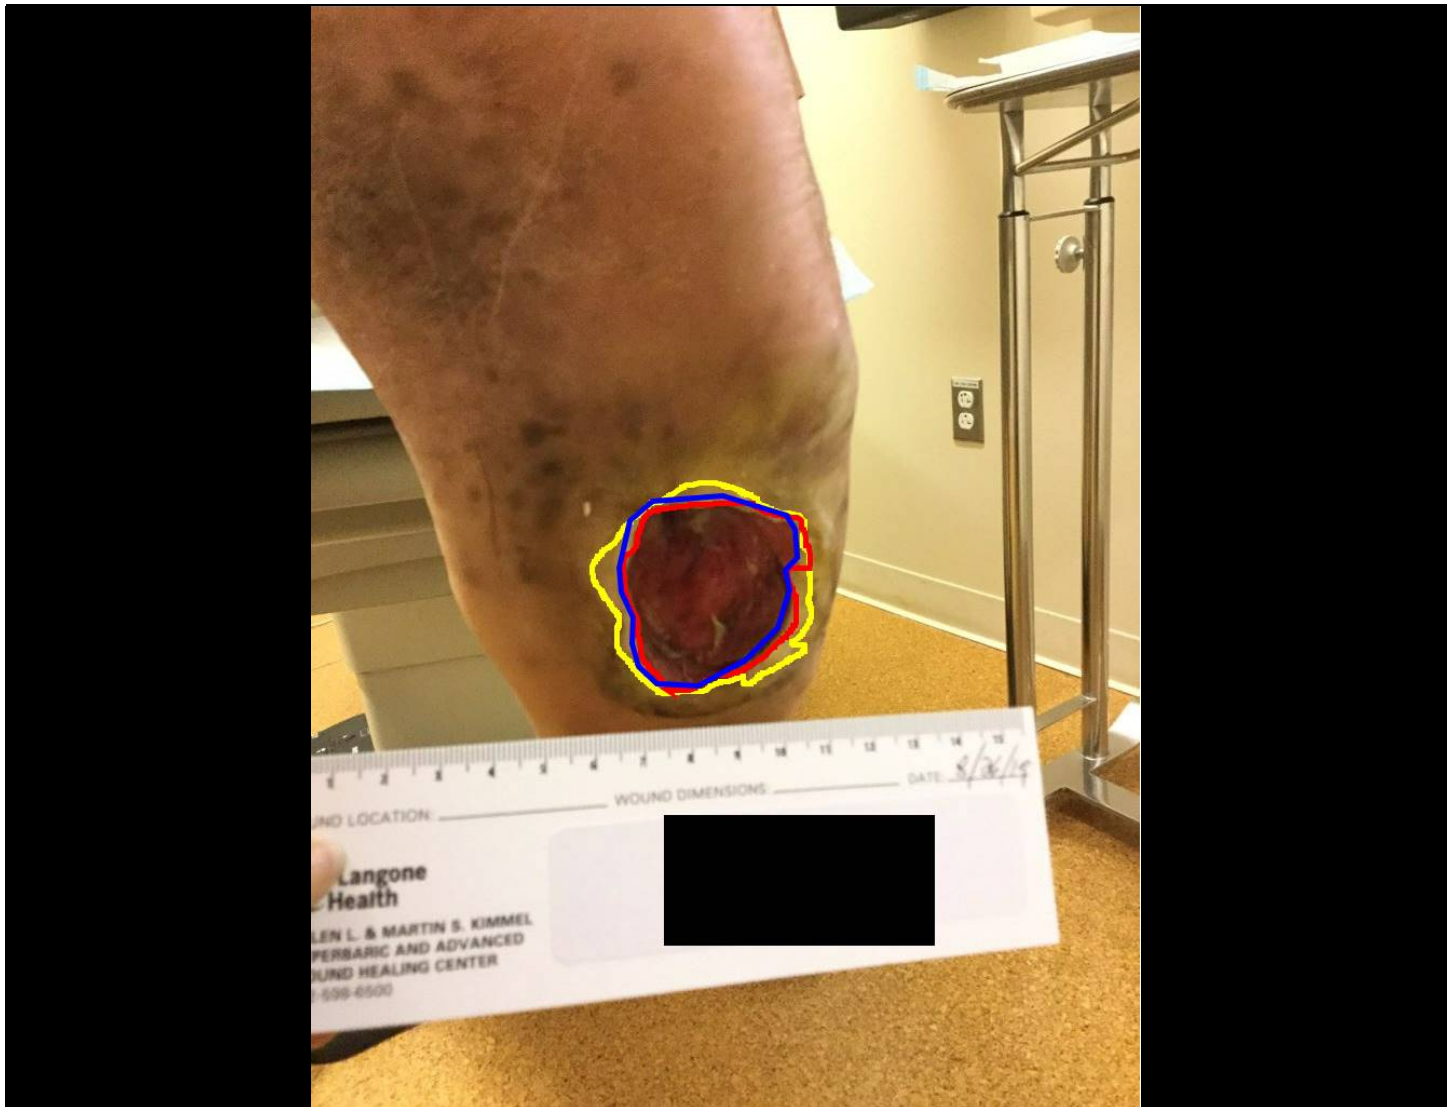

| Tracing Data |                               |                           |                               |
|--------------|-------------------------------|---------------------------|-------------------------------|
| Tracer:      | Wound Area (px <sup>2</sup> ) | Ruler Calibration (px/cm) | Wound Area (cm <sup>2</sup> ) |
| H1           | 29634                         | 45.1                      | 14.57                         |
| H2           | 22659                         | 44.4                      | 11.50                         |
| AI           | 22586                         | 46.6                      | 10.40                         |

| Tracing Comparisons     |                     |                     |                     |                     |
|-------------------------|---------------------|---------------------|---------------------|---------------------|
| Difference Metric:      | Human-Human         |                     | Human-AI            |                     |
|                         | H1(ref)<br>H2(test) | H2(ref)<br>H1(test) | H1(ref)<br>AI(test) | H2(ref)<br>AI(test) |
| False Negative Area (%) | 23.7                | 0.3                 | 23.8                | 7.0                 |
| False Positive Area (%) | 0.2                 | 31.0                | 0.0                 | 6.7                 |
| Relative Error (%)      | 23.5                | 30.8                | 23.8                | 0.3                 |

| Blinded Attending Surgeon Review |              |                      |                      |                      |              |                         |
|----------------------------------|--------------|----------------------|----------------------|----------------------|--------------|-------------------------|
| Reviewer                         | PGT Estimate | H1 meets definition? | H2 meets definition? | AI meets definition? | Which is AI? | Which is most accurate? |
| 1                                | 100          | No                   | Yes                  | Yes                  | H2           | H2                      |
| 2                                | 100          | No                   | Yes                  | Yes                  | H2           | AI                      |
| 3                                | 90           | No                   | Yes                  | Yes                  | H2           | H1                      |

| Wound EMR Information |        |     |            |                |                   |                  |                  |                               |
|-----------------------|--------|-----|------------|----------------|-------------------|------------------|------------------|-------------------------------|
| Sequential Number     | Gender | Age | Wound Type | Wound Location | Wound Length (cm) | Wound Width (cm) | Wound Depth (cm) | Wound Area (cm <sup>2</sup> ) |
| 19                    | M      | 60  | Arterial   | Foot           |                   |                  |                  |                               |

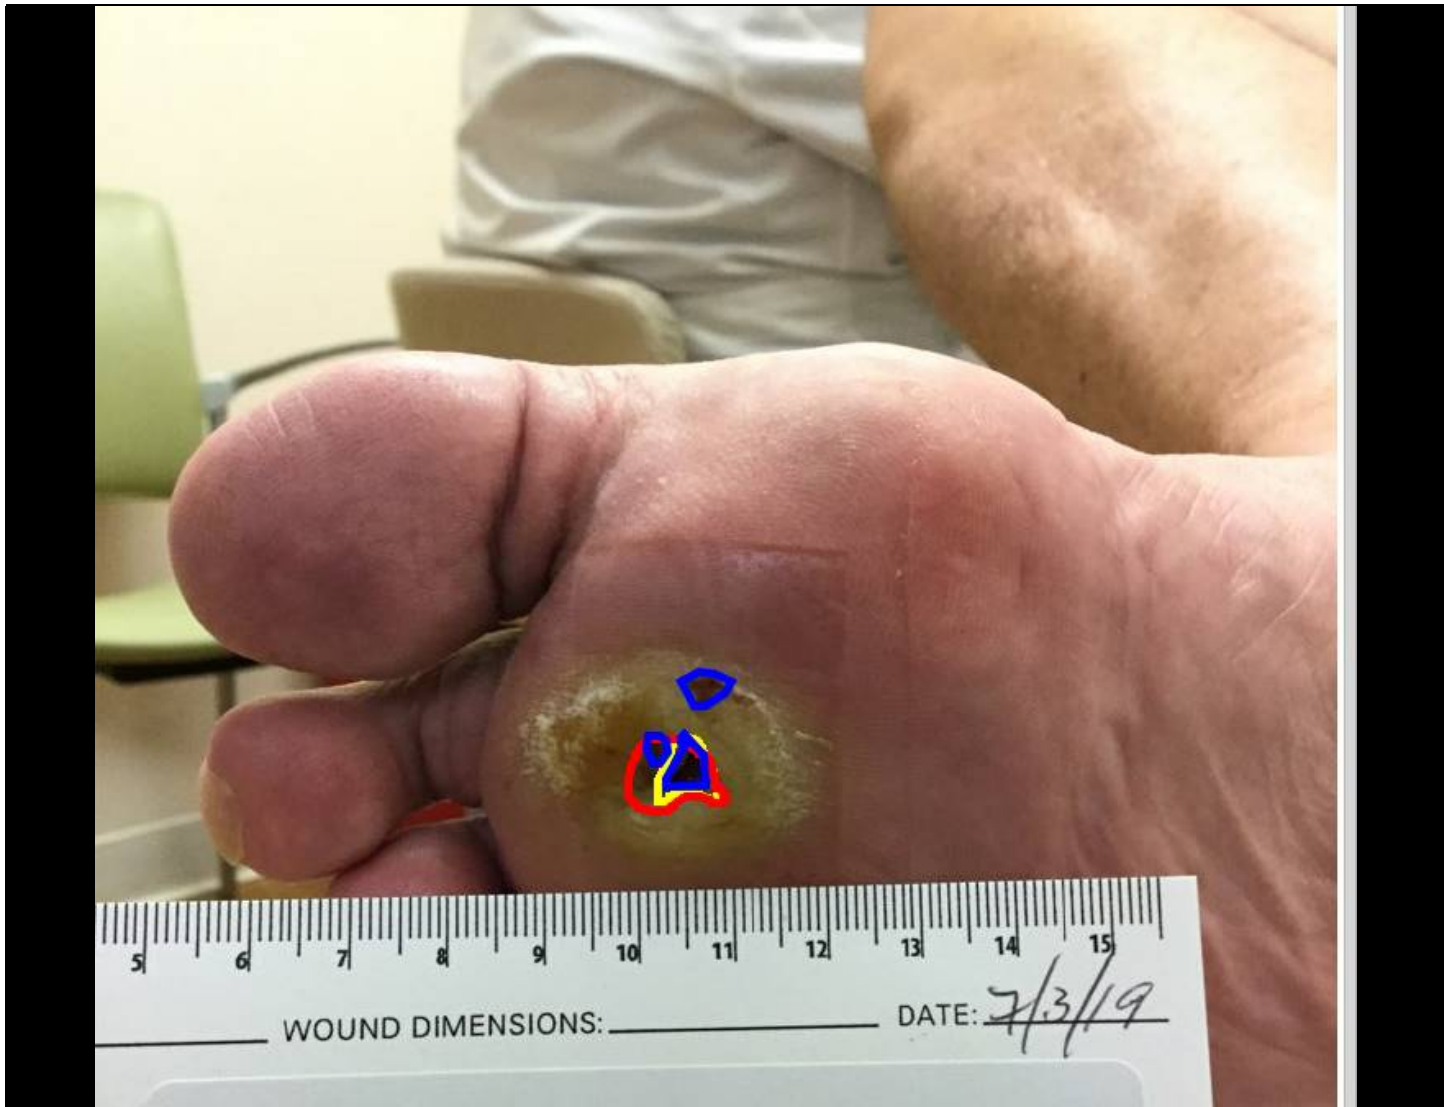

| Tracing Data |                               |                           |                               |
|--------------|-------------------------------|---------------------------|-------------------------------|
| Tracer:      | Wound Area (px <sup>2</sup> ) | Ruler Calibration (px/cm) | Wound Area (cm <sup>2</sup> ) |
| H1           | 962                           | 58.6                      | 0.28                          |
| H2           | 1869                          | 58.8                      | 0.54                          |
| AI           | 1056                          | 59.3                      | 0.30                          |

| Tracing Comparisons     |                     |                     |                     |                     |
|-------------------------|---------------------|---------------------|---------------------|---------------------|
| Difference Metric:      | Human-Human         |                     | Human-AI            |                     |
|                         | H1(ref)<br>H2(test) | H2(ref)<br>H1(test) | H1(ref)<br>AI(test) | H2(ref)<br>AI(test) |
| False Negative Area (%) | 4.3                 | 50.7                | 50.4                | 66.7                |
| False Positive Area (%) | 98.5                | 2.2                 | 60.2                | 23.2                |
| Relative Error (%)      | 94.3                | 48.5                | 9.8                 | 43.5                |

| Blinded Attending Surgeon Review |              |                      |                      |                      |              |                         |
|----------------------------------|--------------|----------------------|----------------------|----------------------|--------------|-------------------------|
| Reviewer                         | PGT Estimate | H1 meets definition? | H2 meets definition? | AI meets definition? | Which is AI? | Which is most accurate? |
| 1                                | 50           | No                   | No                   | Yes                  | H2           | H2                      |
| 2                                | 50           | Yes                  | Yes                  | Yes                  | AI           | AI                      |
| 3                                | 100          | No                   | Yes                  | No                   | H2           | H1                      |



| Wound EMR Information |        |     |            |                |                   |                  |                  |                               |
|-----------------------|--------|-----|------------|----------------|-------------------|------------------|------------------|-------------------------------|
| Sequential Number     | Gender | Age | Wound Type | Wound Location | Wound Length (cm) | Wound Width (cm) | Wound Depth (cm) | Wound Area (cm <sup>2</sup> ) |
| 20                    | M      | 84  | Pressure   | Sacral         |                   |                  |                  |                               |

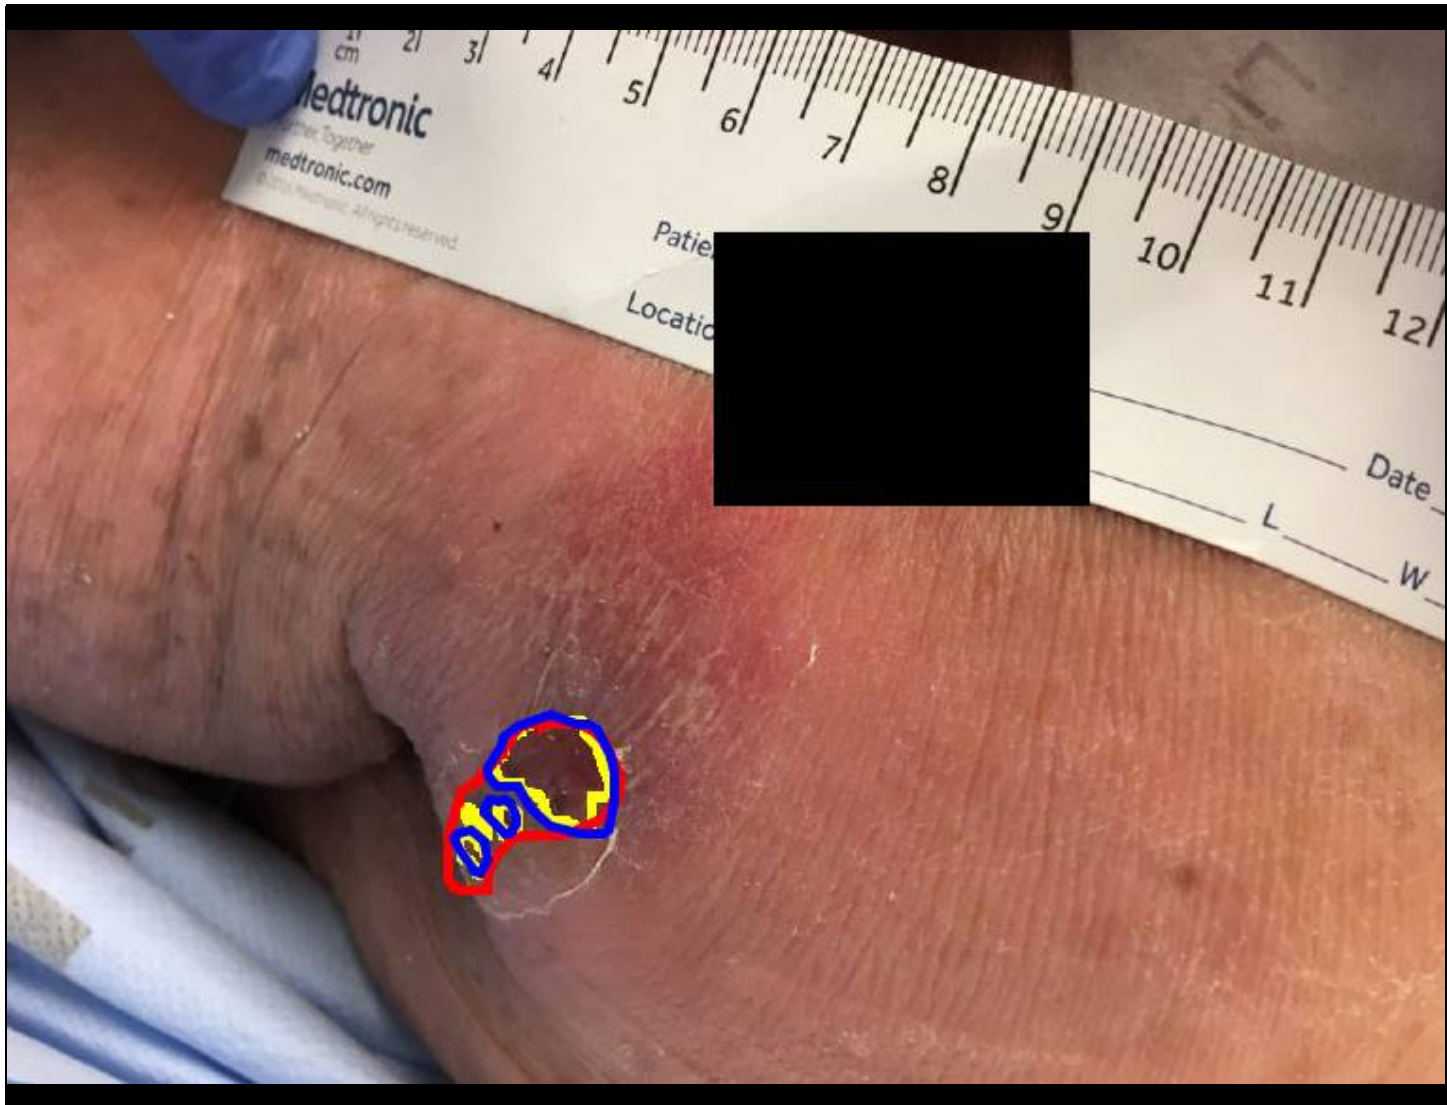

| Tracing Data |                               |                           |                               |
|--------------|-------------------------------|---------------------------|-------------------------------|
| Tracer:      | Wound Area (px <sup>2</sup> ) | Ruler Calibration (px/cm) | Wound Area (cm <sup>2</sup> ) |
| H1           | 2678                          | 65.4                      | 0.63                          |
| H2           | 4675                          | 64.6                      | 1.12                          |
| AI           | 3454                          | 61.9                      | 0.90                          |

| Tracing Comparisons     |                     |                     |                     |                     |
|-------------------------|---------------------|---------------------|---------------------|---------------------|
| Difference Metric:      | Human-Human         |                     | Human-AI            |                     |
|                         | H1(ref)<br>H2(test) | H2(ref)<br>H1(test) | H1(ref)<br>AI(test) | H2(ref)<br>AI(test) |
| False Negative Area (%) | 1.3                 | 43.5                | 5.1                 | 31.0                |
| False Positive Area (%) | 75.9                | 0.8                 | 34.1                | 4.9                 |
| Relative Error (%)      | 74.6                | 42.7                | 29.0                | 26.1                |

| Blinded Attending Surgeon Review |              |                      |                      |                      |              |                         |
|----------------------------------|--------------|----------------------|----------------------|----------------------|--------------|-------------------------|
| Reviewer                         | PGT Estimate | H1 meets definition? | H2 meets definition? | AI meets definition? | Which is AI? | Which is most accurate? |
| 1                                | 100          | Yes                  | No                   | Yes                  | H1           | H1                      |
| 2                                | 100          | Yes                  | Yes                  | Yes                  | H1           | H1                      |
| 3                                | 100          | Yes                  | No                   | Yes                  | H1           | AI                      |

| Wound EMR Information |        |     |            |                |                   |                  |                  |                               |
|-----------------------|--------|-----|------------|----------------|-------------------|------------------|------------------|-------------------------------|
| Sequential Number     | Gender | Age | Wound Type | Wound Location | Wound Length (cm) | Wound Width (cm) | Wound Depth (cm) | Wound Area (cm <sup>2</sup> ) |
| 21                    | F      | 72  | Pressure   | Calf/leg       | 1.5               |                  |                  |                               |

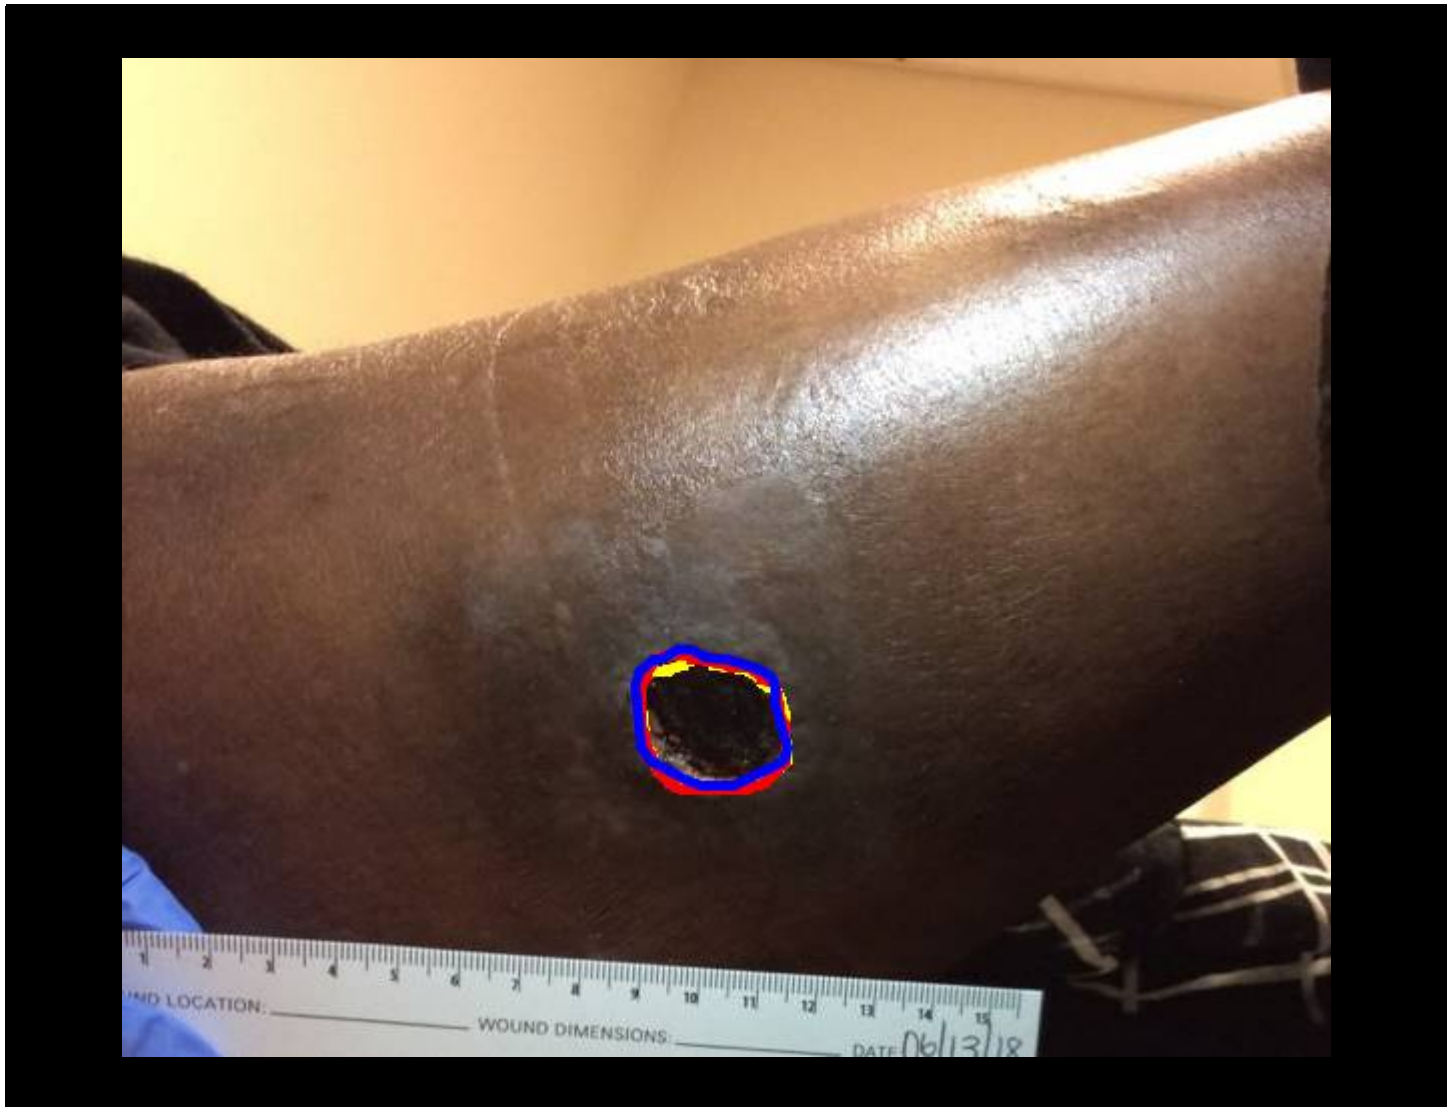

| Tracing Data |                               |                           |                               |
|--------------|-------------------------------|---------------------------|-------------------------------|
| Tracer:      | Wound Area (px <sup>2</sup> ) | Ruler Calibration (px/cm) | Wound Area (cm <sup>2</sup> ) |
| H1           | 3782                          | 30.4                      | 4.09                          |
| H2           | 4042                          | 31.1                      | 4.19                          |
| AI           | 3987                          | 31.6                      | 4.00                          |

| Tracing Comparisons     |                     |                     |                     |                     |
|-------------------------|---------------------|---------------------|---------------------|---------------------|
| Difference Metric:      | Human-Human         |                     | Human-AI            |                     |
|                         | H1(ref)<br>H2(test) | H2(ref)<br>H1(test) | H1(ref)<br>AI(test) | H2(ref)<br>AI(test) |
| False Negative Area (%) | 1.5                 | 7.8                 | 3.4                 | 6.7                 |
| False Positive Area (%) | 8.4                 | 1.4                 | 8.8                 | 5.3                 |
| Relative Error (%)      | 6.9                 | 6.4                 | 5.4                 | 1.4                 |

| Blinded Attending Surgeon Review |              |                      |                      |                      |              |                         |
|----------------------------------|--------------|----------------------|----------------------|----------------------|--------------|-------------------------|
| Reviewer                         | PGT Estimate | H1 meets definition? | H2 meets definition? | AI meets definition? | Which is AI? | Which is most accurate? |
| 1                                | 0            | Yes                  | Yes                  | Yes                  | H1           | H2                      |
| 2                                | 0            | Yes                  | Yes                  | Yes                  | H2           | H2                      |
| 3                                | 100          | Yes                  | Yes                  | Yes                  | H2           | H2                      |

| Wound EMR Information |        |     |            |                |                   |                  |                  |                               |
|-----------------------|--------|-----|------------|----------------|-------------------|------------------|------------------|-------------------------------|
| Sequential Number     | Gender | Age | Wound Type | Wound Location | Wound Length (cm) | Wound Width (cm) | Wound Depth (cm) | Wound Area (cm <sup>2</sup> ) |
| 23                    | F      | 46  | Abscess    | below belly    | 0.5               | 0.3              | 0.2              | 0.15                          |

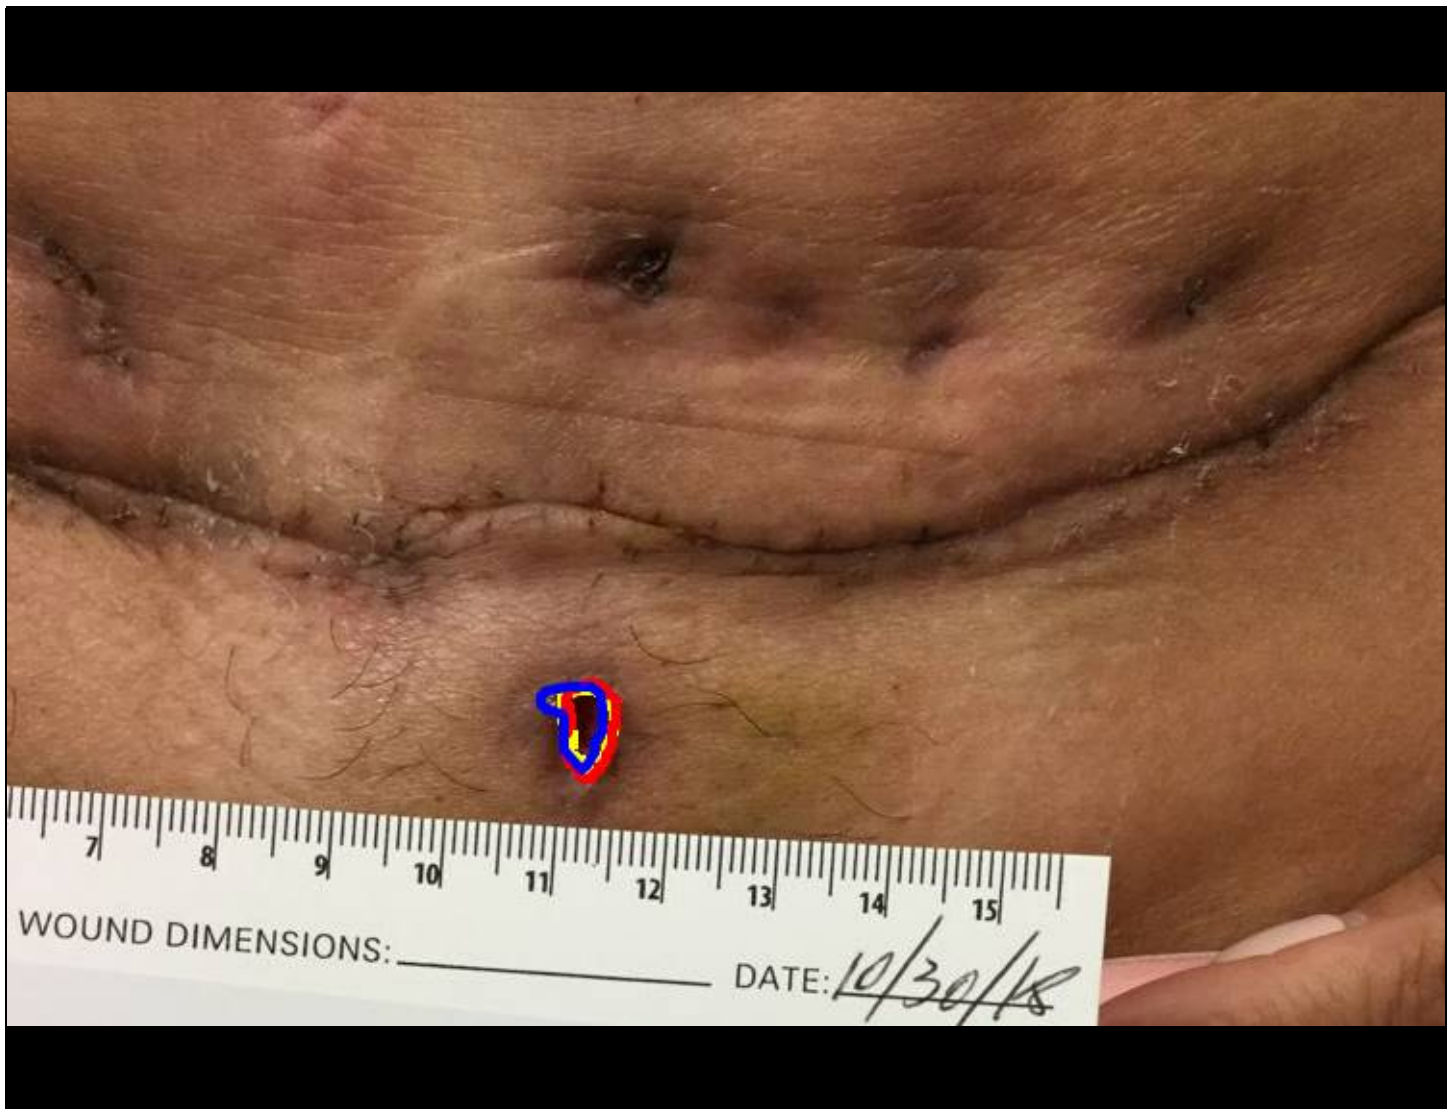

| Tracing Data |                               |                           |                               |
|--------------|-------------------------------|---------------------------|-------------------------------|
| Tracer:      | Wound Area (px <sup>2</sup> ) | Ruler Calibration (px/cm) | Wound Area (cm <sup>2</sup> ) |
| H1           | 862                           | 58.7                      | 0.25                          |
| H2           | 997                           | 57.6                      | 0.30                          |
| AI           | 862                           | 65.7                      | 0.20                          |

| Tracing Comparisons     |                     |                     |                     |                     |
|-------------------------|---------------------|---------------------|---------------------|---------------------|
| Difference Metric:      | Human-Human         |                     | Human-AI            |                     |
|                         | H1(ref)<br>H2(test) | H2(ref)<br>H1(test) | H1(ref)<br>AI(test) | H2(ref)<br>AI(test) |
| False Negative Area (%) | 8.6                 | 21.0                | 24.0                | 33.2                |
| False Positive Area (%) | 24.2                | 7.4                 | 24.0                | 19.7                |
| Relative Error (%)      | 15.7                | 13.5                | 0.0                 | 13.5                |

| Blinded Attending Surgeon Review |              |                      |                      |                      |              |                         |
|----------------------------------|--------------|----------------------|----------------------|----------------------|--------------|-------------------------|
| Reviewer                         | PGT Estimate | H1 meets definition? | H2 meets definition? | AI meets definition? | Which is AI? | Which is most accurate? |
| 1                                | 100          | Yes                  | Yes                  | Yes                  | H2           | H2                      |
| 2                                | 100          | Yes                  | Yes                  | Yes                  | H2           | H2                      |
| 3                                | 100          | Yes                  | Yes                  | No                   | H1           | H2                      |

| Wound EMR Information |        |     |            |                |                   |                  |                  |                               |
|-----------------------|--------|-----|------------|----------------|-------------------|------------------|------------------|-------------------------------|
| Sequential Number     | Gender | Age | Wound Type | Wound Location | Wound Length (cm) | Wound Width (cm) | Wound Depth (cm) | Wound Area (cm <sup>2</sup> ) |
| 24                    | M      | 83  | Surgical   | Chest          | 3.0               |                  |                  |                               |

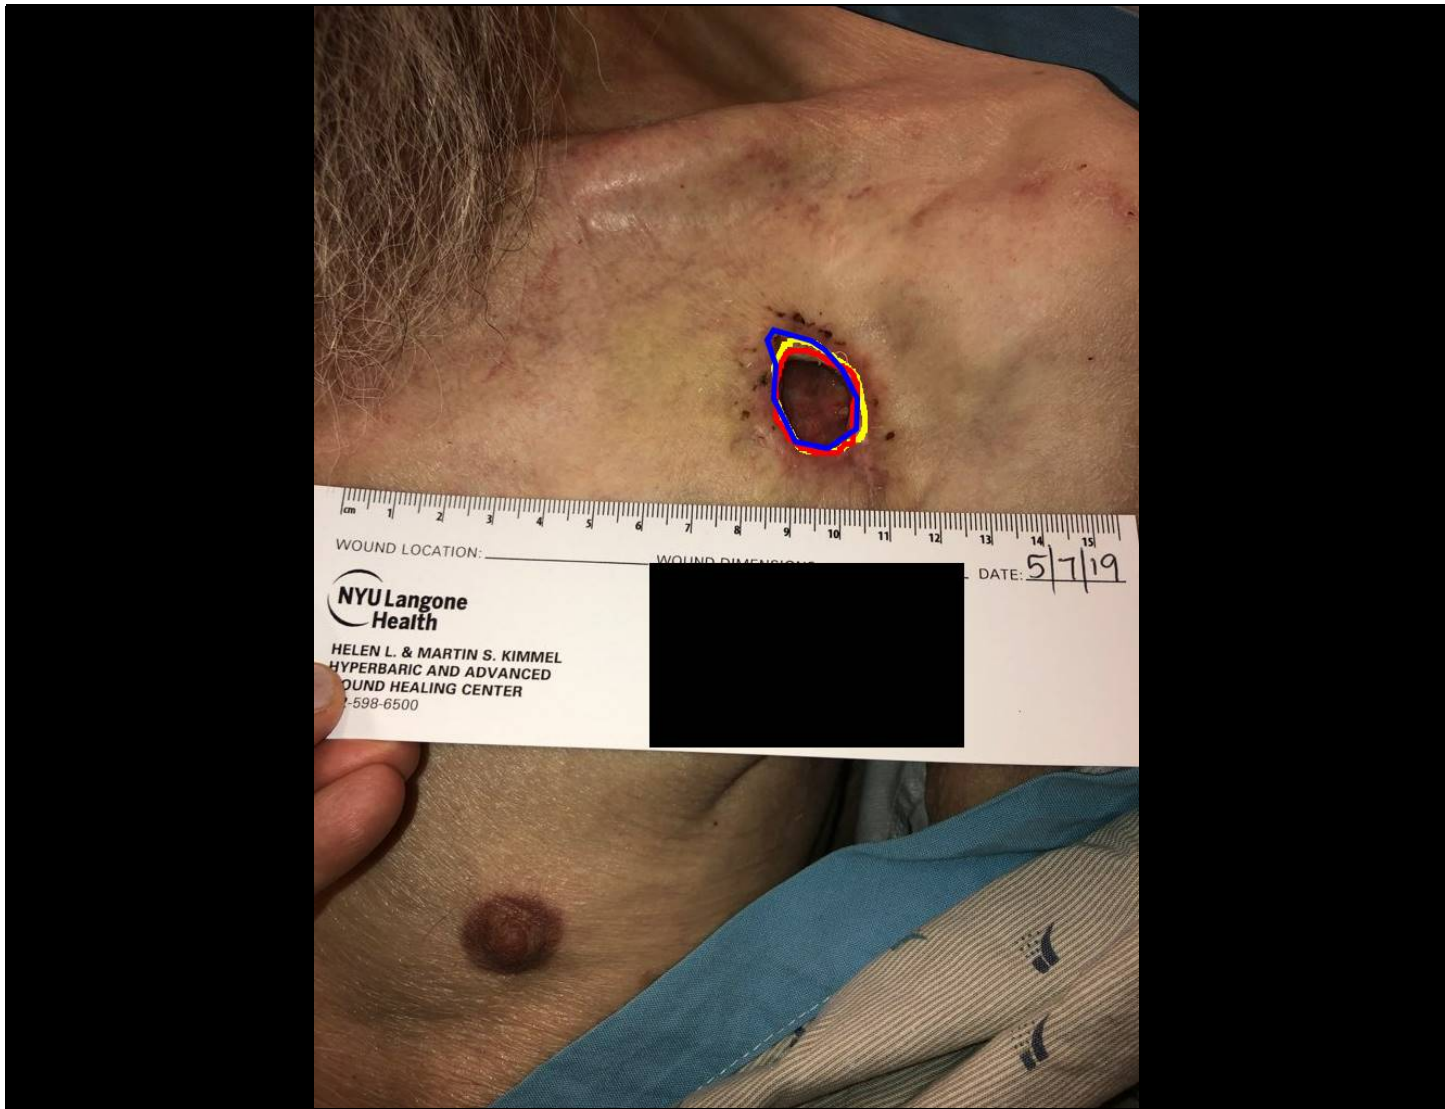

| Tracing Data |                               |                           |                               |
|--------------|-------------------------------|---------------------------|-------------------------------|
| Tracer:      | Wound Area (px <sup>2</sup> ) | Ruler Calibration (px/cm) | Wound Area (cm <sup>2</sup> ) |
| H1           | 6508                          | 45.4                      | 3.16                          |
| H2           | 5689                          | 47.0                      | 2.58                          |
| AI           | 6096                          | 45.8                      | 2.90                          |

| Tracing Comparisons     |                     |                     |                     |                     |
|-------------------------|---------------------|---------------------|---------------------|---------------------|
| Difference Metric:      | Human-Human         |                     | Human-AI            |                     |
|                         | H1(ref)<br>H2(test) | H2(ref)<br>H1(test) | H1(ref)<br>AI(test) | H2(ref)<br>AI(test) |
| False Negative Area (%) | 15.4                | 3.2                 | 12.4                | 10.3                |
| False Positive Area (%) | 2.8                 | 17.6                | 6.1                 | 17.5                |
| Relative Error (%)      | 12.6                | 14.4                | 6.3                 | 7.2                 |

| Blinded Attending Surgeon Review |              |                      |                      |                      |              |                         |
|----------------------------------|--------------|----------------------|----------------------|----------------------|--------------|-------------------------|
| Reviewer                         | PGT Estimate | H1 meets definition? | H2 meets definition? | AI meets definition? | Which is AI? | Which is most accurate? |
| 1                                | 90           | No                   | No                   | No                   | H2           | H1                      |
| 2                                | 80           | Yes                  | Yes                  | Yes                  | AI           | H2                      |
| 3                                | 100          | No                   | Yes                  | No                   | AI           | H1                      |

| Wound EMR Information |        |     |            |                |                   |                  |                  |                               |
|-----------------------|--------|-----|------------|----------------|-------------------|------------------|------------------|-------------------------------|
| Sequential Number     | Gender | Age | Wound Type | Wound Location | Wound Length (cm) | Wound Width (cm) | Wound Depth (cm) | Wound Area (cm <sup>2</sup> ) |
| 25                    | M      | 52  | Surgical   | Foot-Dorsum    |                   |                  |                  |                               |

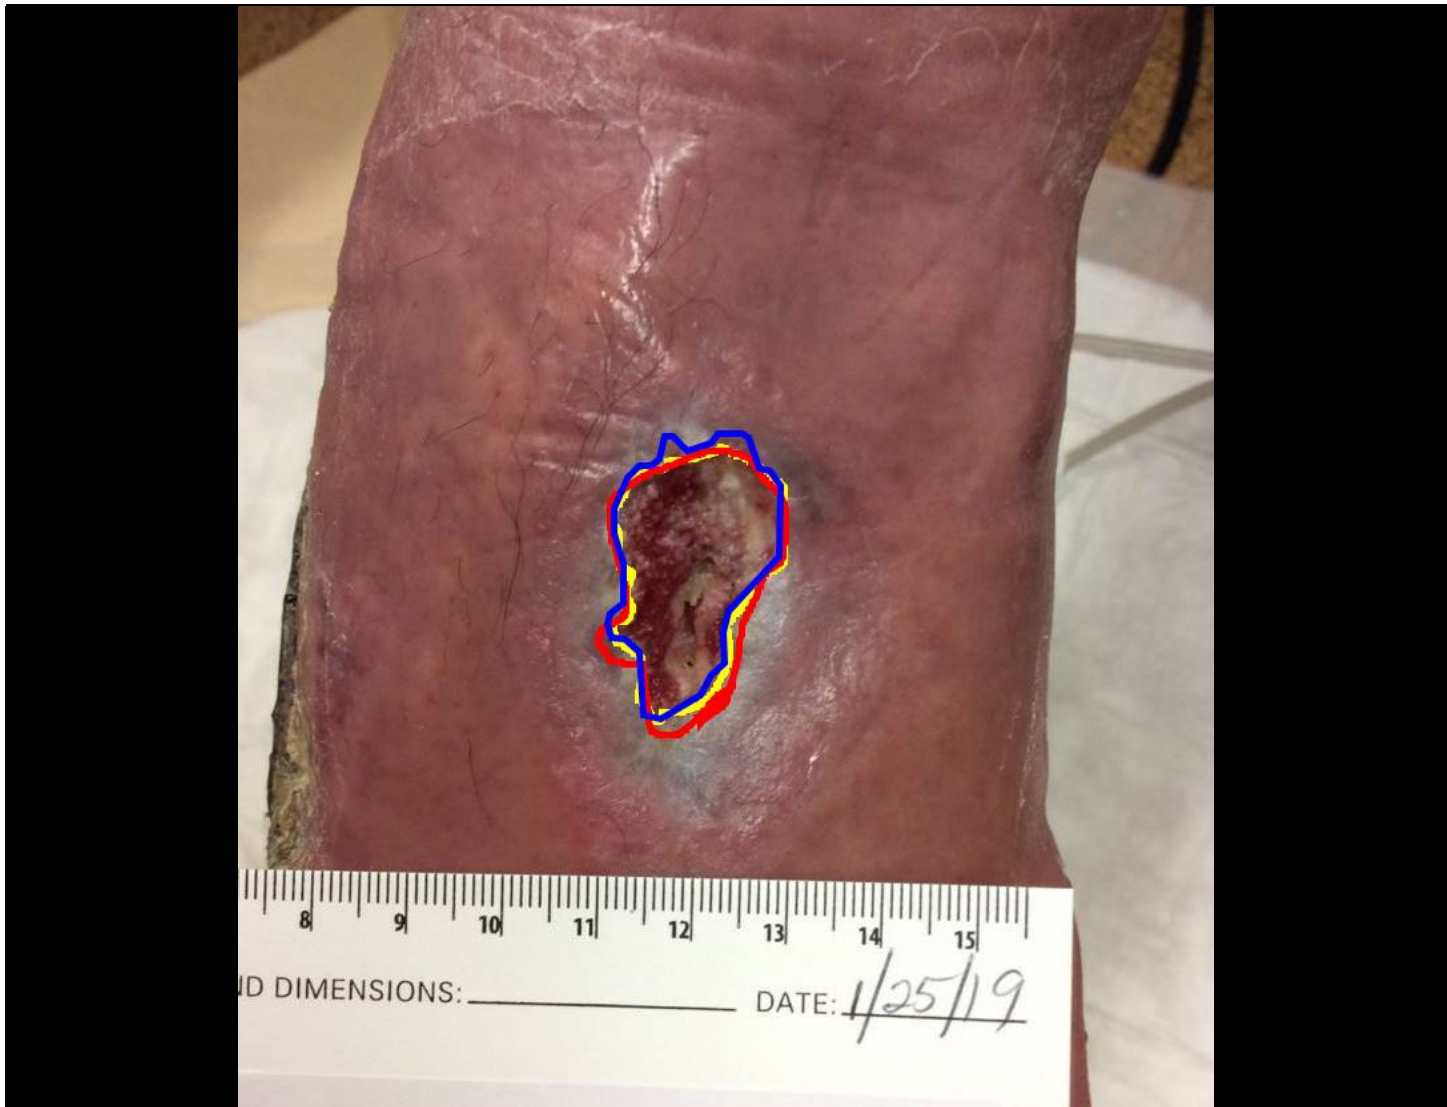

| Tracing Data |                               |                           |                               |
|--------------|-------------------------------|---------------------------|-------------------------------|
| Tracer:      | Wound Area (px <sup>2</sup> ) | Ruler Calibration (px/cm) | Wound Area (cm <sup>2</sup> ) |
| H1           | 17650                         | 71.5                      | 3.45                          |
| H2           | 19558                         | 72.0                      | 3.77                          |
| AI           | 18197                         | 72.1                      | 3.50                          |

| Tracing Comparisons     |                     |                     |                     |                     |
|-------------------------|---------------------|---------------------|---------------------|---------------------|
| Difference Metric:      | Human-Human         |                     | Human-AI            |                     |
|                         | H1(ref)<br>H2(test) | H2(ref)<br>H1(test) | H1(ref)<br>AI(test) | H2(ref)<br>AI(test) |
| False Negative Area (%) | 2.2                 | 11.8                | 5.0                 | 13.9                |
| False Positive Area (%) | 13.1                | 2.0                 | 8.1                 | 6.9                 |
| Relative Error (%)      | 10.8                | 9.8                 | 3.1                 | 7.0                 |

| Blinded Attending Surgeon Review |              |                      |                      |                      |              |                         |
|----------------------------------|--------------|----------------------|----------------------|----------------------|--------------|-------------------------|
| Reviewer                         | PGT Estimate | H1 meets definition? | H2 meets definition? | AI meets definition? | Which is AI? | Which is most accurate? |
| 1                                | 60           | Yes                  | Yes                  | Yes                  | H1           | H1                      |
| 2                                | 80           | Yes                  | Yes                  | Yes                  | H2           | H2                      |
| 3                                | 70           | Yes                  | No                   | Yes                  | H1           | H2                      |

| Wound EMR Information |        |     |            |                |                   |                  |                  |                               |
|-----------------------|--------|-----|------------|----------------|-------------------|------------------|------------------|-------------------------------|
| Sequential Number     | Gender | Age | Wound Type | Wound Location | Wound Length (cm) | Wound Width (cm) | Wound Depth (cm) | Wound Area (cm <sup>2</sup> ) |
| 26                    | M      | 27  | Pressure   | Ischium        | 2.5               | 1.0              | 7.5              | 2.50                          |

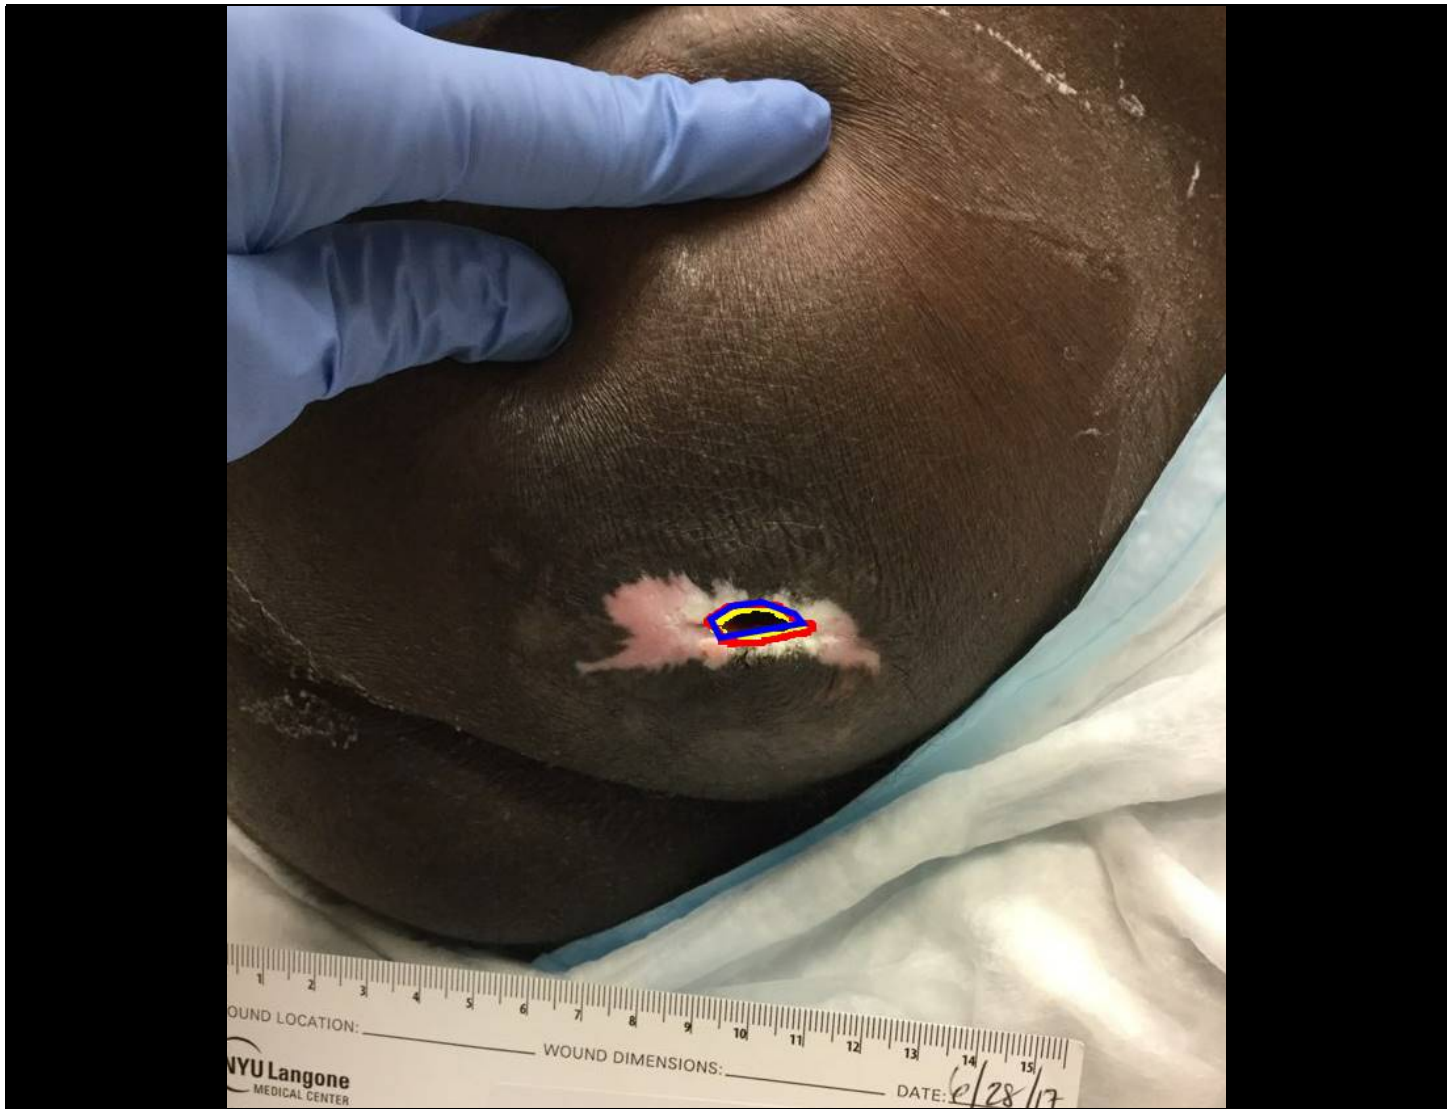

| Tracing Data |                               |                           |                               |
|--------------|-------------------------------|---------------------------|-------------------------------|
| Tracer:      | Wound Area (px <sup>2</sup> ) | Ruler Calibration (px/cm) | Wound Area (cm <sup>2</sup> ) |
| H1           | 1086                          | 42.4                      | 0.60                          |
| H2           | 1641                          | 50.9                      | 0.63                          |
| AI           | 1131                          | 40.2                      | 0.70                          |

| Tracing Comparisons     |                     |                     |                     |                     |
|-------------------------|---------------------|---------------------|---------------------|---------------------|
| Difference Metric:      | Human-Human         |                     | Human-AI            |                     |
|                         | H1(ref)<br>H2(test) | H2(ref)<br>H1(test) | H1(ref)<br>AI(test) | H2(ref)<br>AI(test) |
| False Negative Area (%) | 0.4                 | 34.1                | 19.7                | 33.5                |
| False Positive Area (%) | 51.5                | 0.2                 | 23.8                | 2.4                 |
| Relative Error (%)      | 51.1                | 33.8                | 4.1                 | 31.1                |

| Blinded Attending Surgeon Review |              |                      |                      |                      |              |                         |
|----------------------------------|--------------|----------------------|----------------------|----------------------|--------------|-------------------------|
| Reviewer                         | PGT Estimate | H1 meets definition? | H2 meets definition? | AI meets definition? | Which is AI? | Which is most accurate? |
| 1                                | 100          | Yes                  | Yes                  | Yes                  | H1           | H1                      |
| 2                                | 50           | Yes                  | Yes                  | Yes                  | H2           | H2                      |
| 3                                | 100          | Yes                  | Yes                  | No                   | H2           | H1                      |

| Wound EMR Information |        |     |            |                |                   |                  |                  |                               |
|-----------------------|--------|-----|------------|----------------|-------------------|------------------|------------------|-------------------------------|
| Sequential Number     | Gender | Age | Wound Type | Wound Location | Wound Length (cm) | Wound Width (cm) | Wound Depth (cm) | Wound Area (cm <sup>2</sup> ) |
| 27                    | F      | 33  | Surgical   | Abdomen        | 10.0              | 8.0              | 3.0              | 80.00                         |

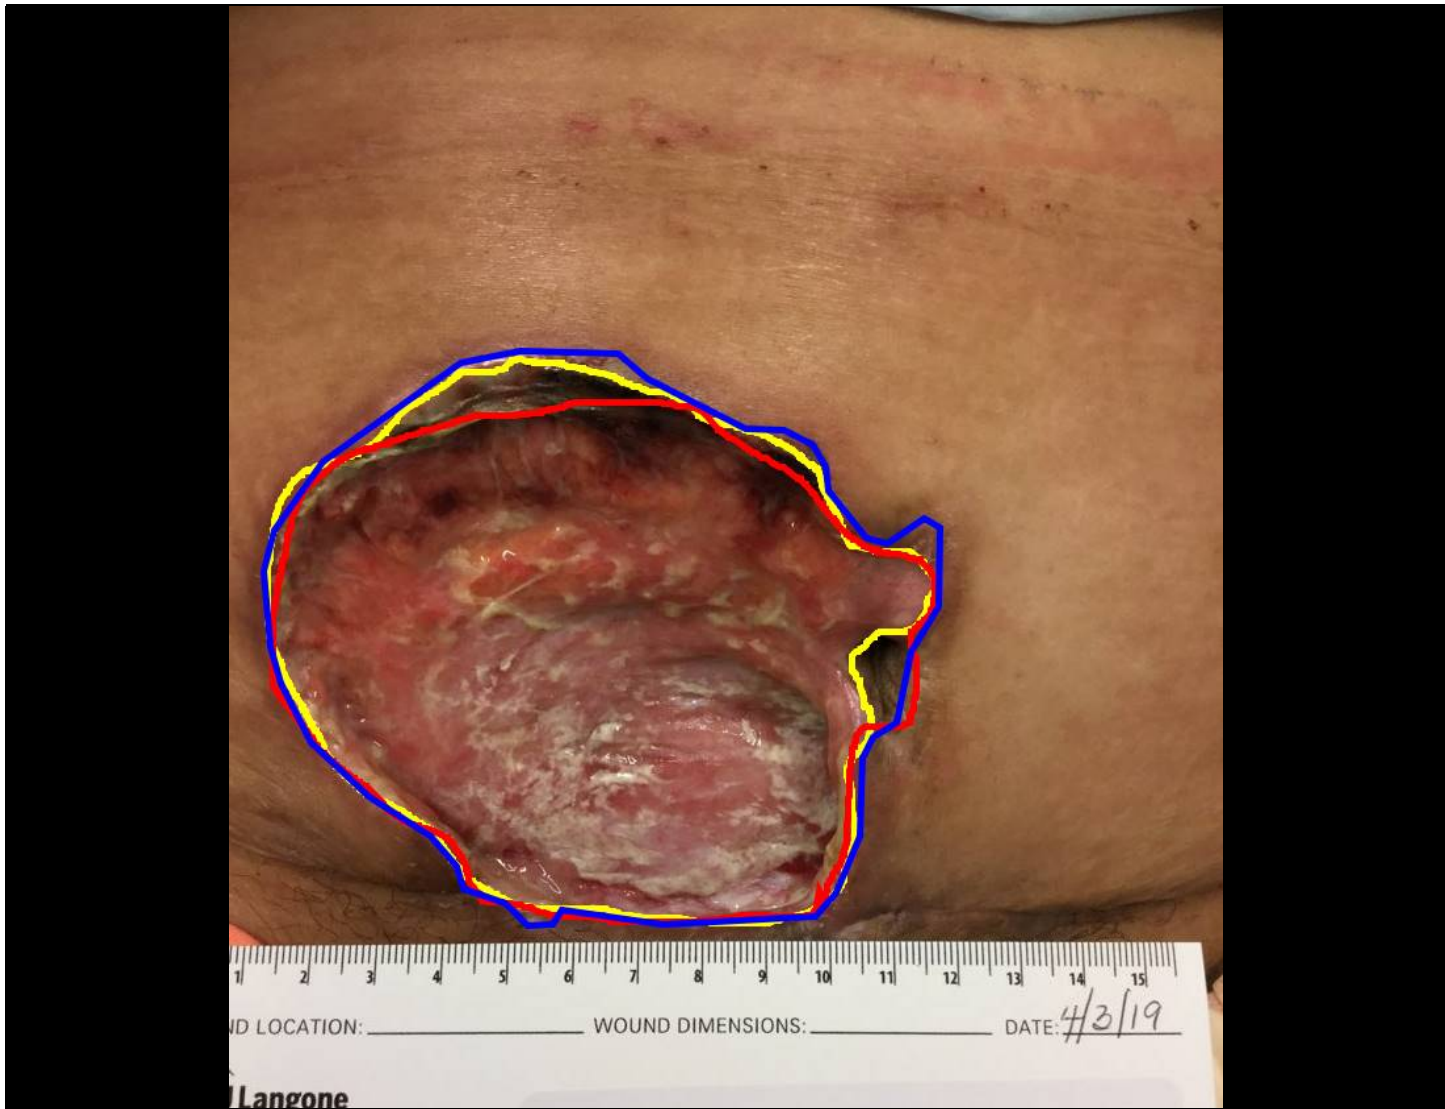

| Tracing Data |                               |                           |                               |
|--------------|-------------------------------|---------------------------|-------------------------------|
| Tracer:      | Wound Area (px <sup>2</sup> ) | Ruler Calibration (px/cm) | Wound Area (cm <sup>2</sup> ) |
| H1           | 154896                        | 49.5                      | 63.26                         |
| H2           | 149623                        | 45.0                      | 73.88                         |
| AI           | 164510                        | 49.0                      | 68.60                         |

| Tracing Comparisons     |                     |                     |                     |                     |
|-------------------------|---------------------|---------------------|---------------------|---------------------|
| Difference Metric:      | Human-Human         |                     | Human-AI            |                     |
|                         | H1(ref)<br>H2(test) | H2(ref)<br>H1(test) | H1(ref)<br>AI(test) | H2(ref)<br>AI(test) |
| False Negative Area (%) | 6.4                 | 3.1                 | 0.4                 | 0.5                 |
| False Positive Area (%) | 3.0                 | 6.6                 | 6.6                 | 10.5                |
| Relative Error (%)      | 3.4                 | 3.5                 | 6.2                 | 9.9                 |

| Blinded Attending Surgeon Review |              |                      |                      |                      |              |                         |
|----------------------------------|--------------|----------------------|----------------------|----------------------|--------------|-------------------------|
| Reviewer                         | PGT Estimate | H1 meets definition? | H2 meets definition? | AI meets definition? | Which is AI? | Which is most accurate? |
| 1                                | 70           | Yes                  | No                   | No                   | H1           | H2                      |
| 2                                | 80           | Yes                  | Yes                  | Yes                  | H2           | H2                      |
| 3                                | 70           | Yes                  | No                   | No                   | H2           | H2                      |





| Wound EMR Information |        |     |            |                   |                   |                  |                  |                               |
|-----------------------|--------|-----|------------|-------------------|-------------------|------------------|------------------|-------------------------------|
| Sequential Number     | Gender | Age | Wound Type | Wound Location    | Wound Length (cm) | Wound Width (cm) | Wound Depth (cm) | Wound Area (cm <sup>2</sup> ) |
| 30                    | F      | 72  | Traumatic  | Leg-R Low Lateral | 5.0               | 4.0              |                  | 20.00                         |

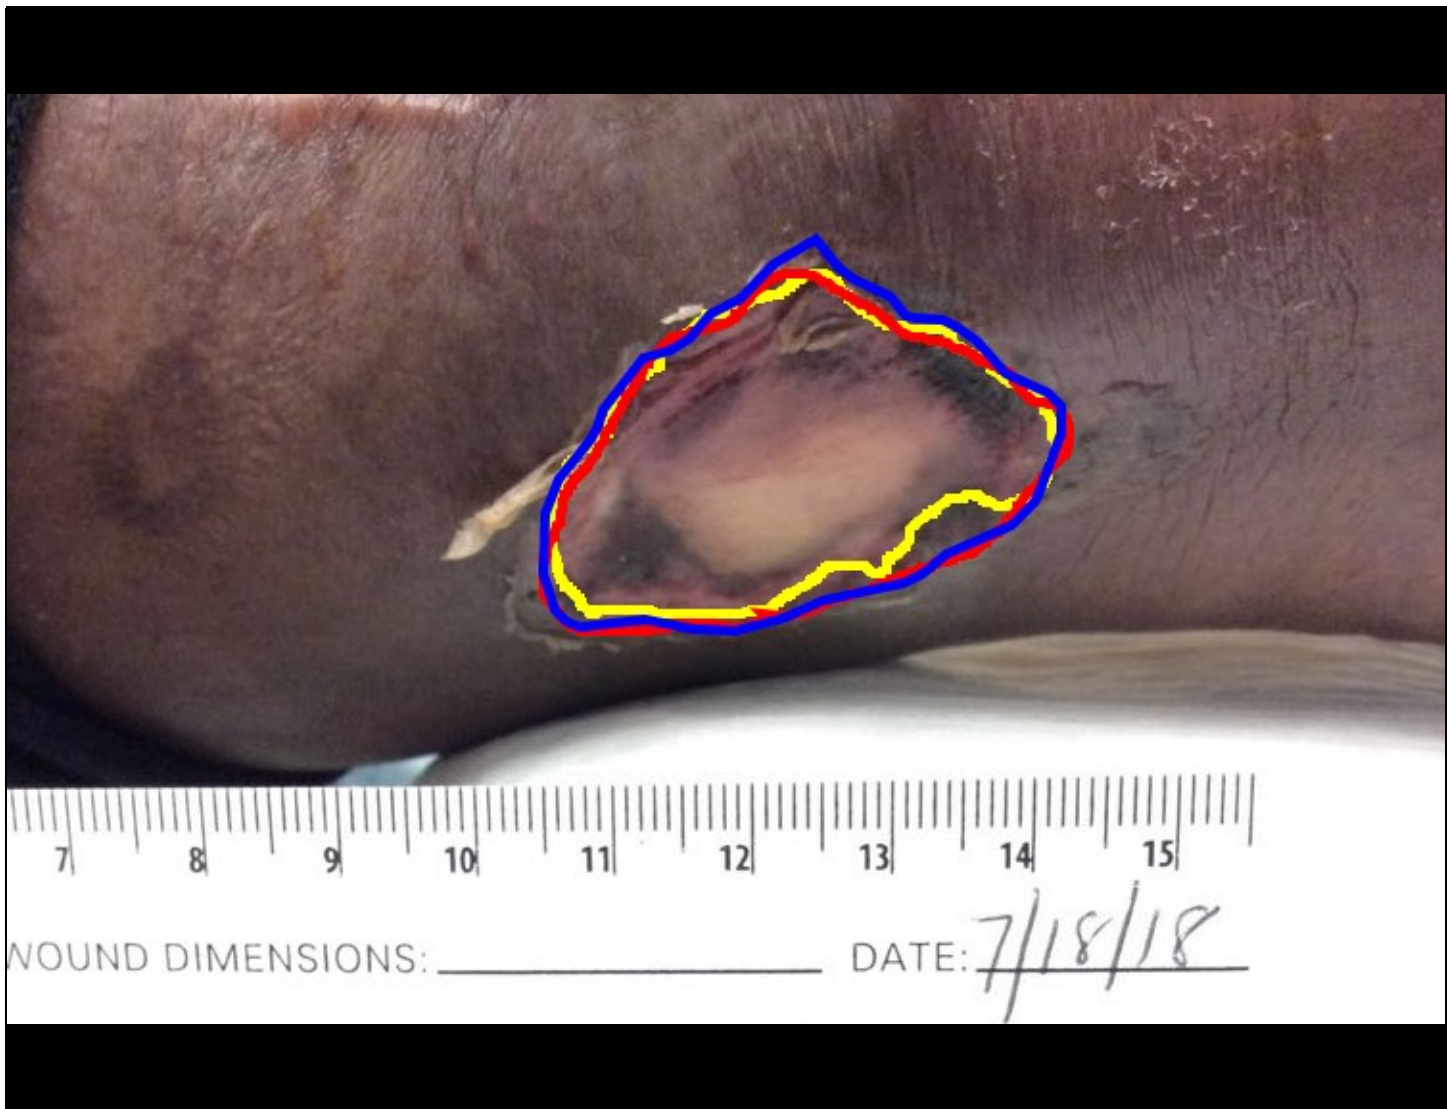

| Tracing Data |                               |                           |                               |
|--------------|-------------------------------|---------------------------|-------------------------------|
| Tracer:      | Wound Area (px <sup>2</sup> ) | Ruler Calibration (px/cm) | Wound Area (cm <sup>2</sup> ) |
| H1           | 29892                         | 72.5                      | 5.69                          |
| H2           | 33144                         | 74.3                      | 6.00                          |
| AI           | 35297                         | 75.5                      | 6.20                          |

| Tracing Comparisons     |                     |                     |                     |                     |
|-------------------------|---------------------|---------------------|---------------------|---------------------|
| Difference Metric:      | Human-Human         |                     | Human-AI            |                     |
|                         | H1(ref)<br>H2(test) | H2(ref)<br>H1(test) | H1(ref)<br>AI(test) | H2(ref)<br>AI(test) |
| False Negative Area (%) | 2.6                 | 12.2                | 0.3                 | 1.5                 |
| False Positive Area (%) | 13.5                | 2.4                 | 18.4                | 8.0                 |
| Relative Error (%)      | 10.9                | 9.8                 | 18.1                | 6.5                 |

| Blinded Attending Surgeon Review |              |                      |                      |                      |              |                         |
|----------------------------------|--------------|----------------------|----------------------|----------------------|--------------|-------------------------|
| Reviewer                         | PGT Estimate | H1 meets definition? | H2 meets definition? | AI meets definition? | Which is AI? | Which is most accurate? |
| 1                                | 100          | No                   | No                   | No                   | H2           | H2                      |
| 2                                | 10           | Yes                  | Yes                  | Yes                  | H2           | H2                      |
| 3                                | 10           | Yes                  | Yes                  | Yes                  | H1           | AI                      |

| Wound EMR Information |        |     |            |                |                   |                  |                  |                               |
|-----------------------|--------|-----|------------|----------------|-------------------|------------------|------------------|-------------------------------|
| Sequential Number     | Gender | Age | Wound Type | Wound Location | Wound Length (cm) | Wound Width (cm) | Wound Depth (cm) | Wound Area (cm <sup>2</sup> ) |
| 31                    | F      | 51  | Surgical   | Back           | 4.0               | 3.5              |                  | 14.00                         |

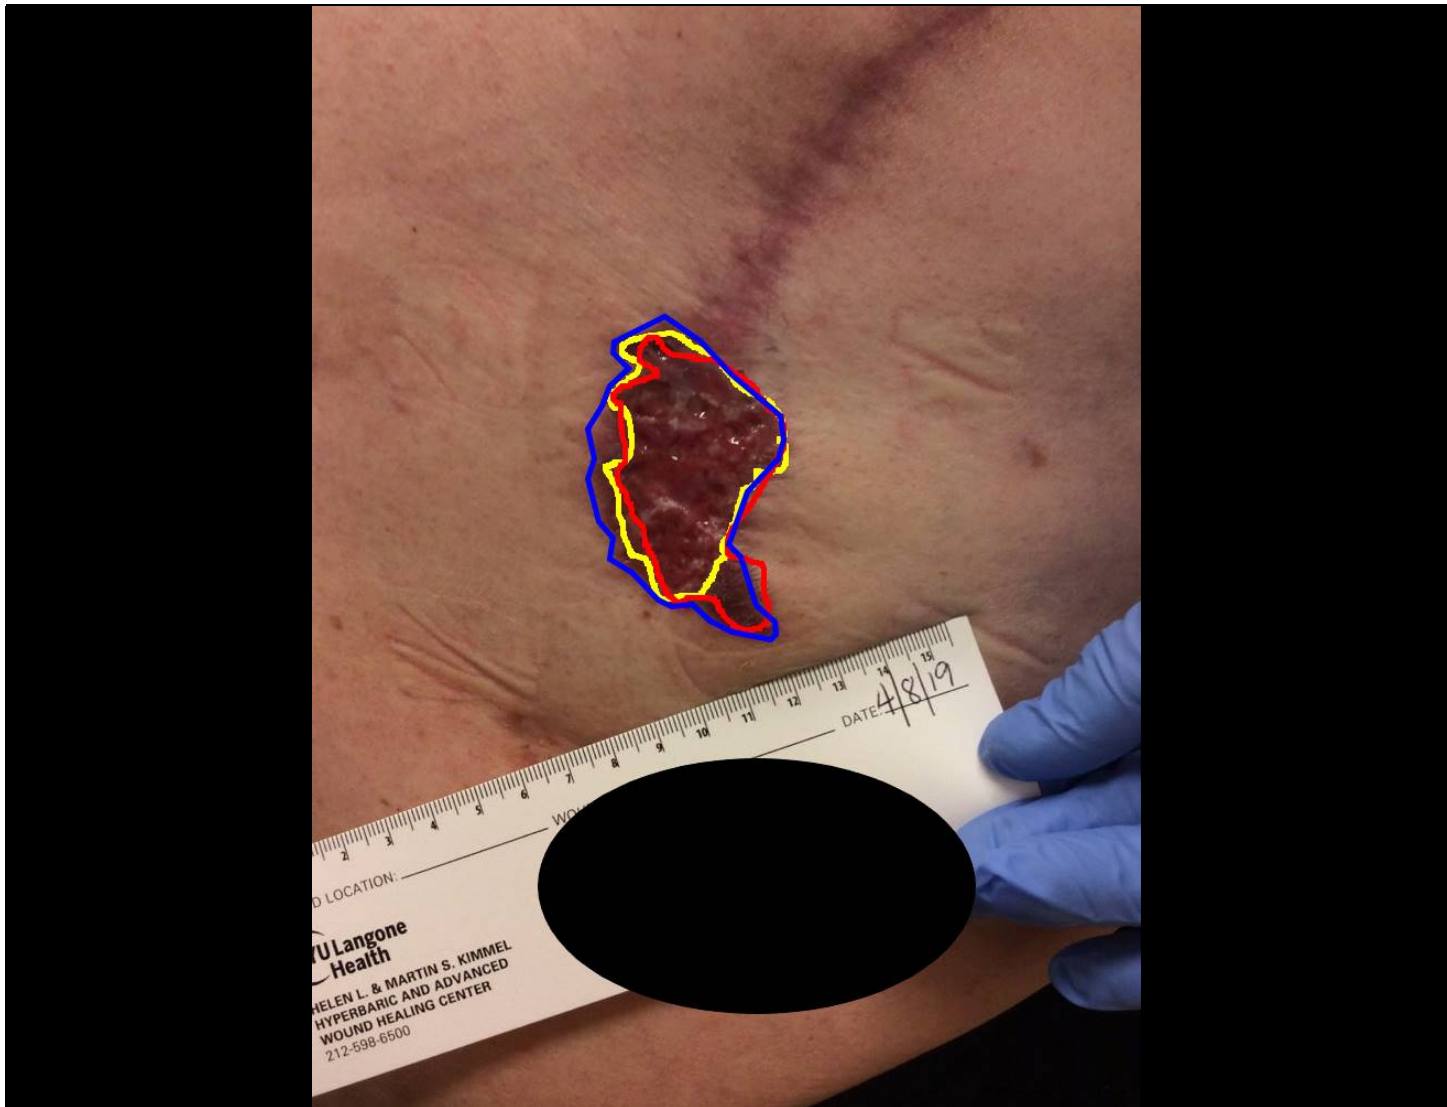

| Tracing Data |                               |                           |                               |
|--------------|-------------------------------|---------------------------|-------------------------------|
| Tracer:      | Wound Area (px <sup>2</sup> ) | Ruler Calibration (px/cm) | Wound Area (cm <sup>2</sup> ) |
| H1           | 24480                         | 43.6                      | 12.85                         |
| H2           | 25626                         | 44.0                      | 13.26                         |
| AI           | 33132                         | 42.7                      | 18.20                         |

| Tracing Comparisons     |                     |                     |                     |                     |
|-------------------------|---------------------|---------------------|---------------------|---------------------|
| Difference Metric:      | Human-Human         |                     | Human-AI            |                     |
|                         | H1(ref)<br>H2(test) | H2(ref)<br>H1(test) | H1(ref)<br>AI(test) | H2(ref)<br>AI(test) |
| False Negative Area (%) | 11.5                | 15.4                | 1.0                 | 4.1                 |
| False Positive Area (%) | 16.2                | 11.0                | 36.3                | 33.3                |
| Relative Error (%)      | 4.7                 | 4.5                 | 35.3                | 29.3                |

| Blinded Attending Surgeon Review |              |                      |                      |                      |              |                         |
|----------------------------------|--------------|----------------------|----------------------|----------------------|--------------|-------------------------|
| Reviewer                         | PGT Estimate | H1 meets definition? | H2 meets definition? | AI meets definition? | Which is AI? | Which is most accurate? |
| 1                                | 100          | Yes                  | Yes                  | Yes                  | H1           | H1                      |
| 2                                | 100          | Yes                  | Yes                  | Yes                  | AI           | H2                      |
| 3                                | 100          | Yes                  | No                   | No                   | H1           | H2                      |

| Wound EMR Information |        |     |            |                |                   |                  |                  |                               |
|-----------------------|--------|-----|------------|----------------|-------------------|------------------|------------------|-------------------------------|
| Sequential Number     | Gender | Age | Wound Type | Wound Location | Wound Length (cm) | Wound Width (cm) | Wound Depth (cm) | Wound Area (cm <sup>2</sup> ) |
| 32                    | F      | 34  | Trauma     | Left lower leg |                   |                  |                  |                               |

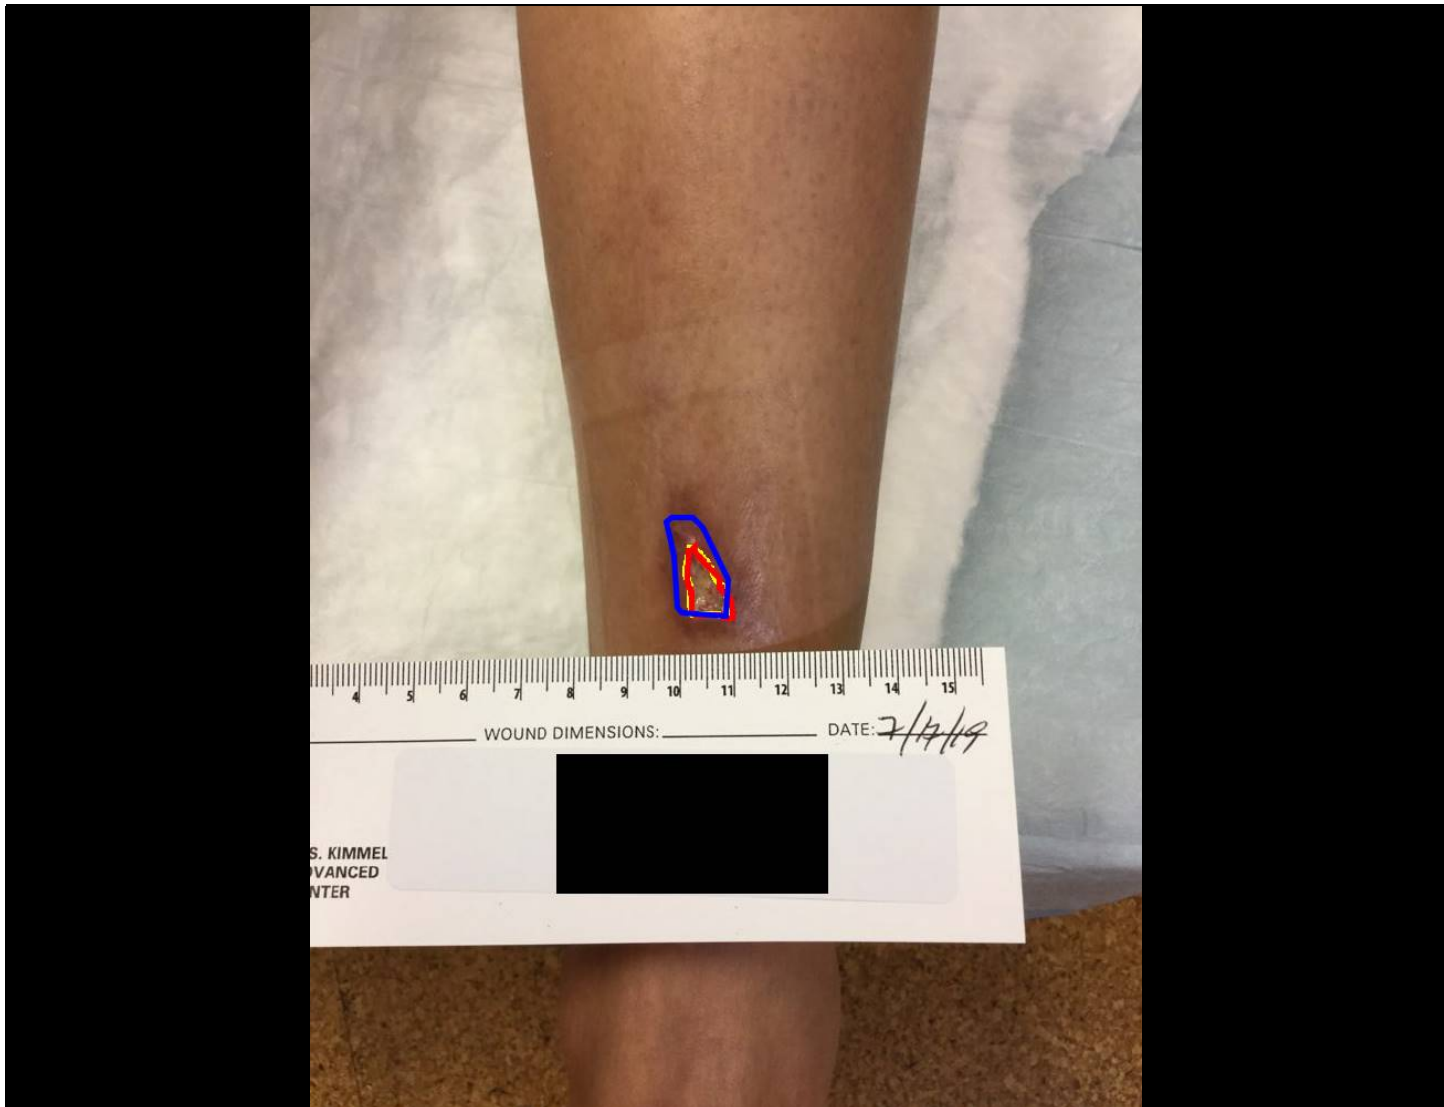

| Tracing Data |                               |                           |                               |
|--------------|-------------------------------|---------------------------|-------------------------------|
| Tracer:      | Wound Area (px <sup>2</sup> ) | Ruler Calibration (px/cm) | Wound Area (cm <sup>2</sup> ) |
| H1           | 1547                          | 48.4                      | 0.66                          |
| H2           | 1524                          | 49.9                      | 0.61                          |
| AI           | 3547                          | 54.4                      | 1.20                          |

| Tracing Comparisons     |                     |                     |                     |                     |
|-------------------------|---------------------|---------------------|---------------------|---------------------|
| Difference Metric:      | Human-Human         |                     | Human-AI            |                     |
|                         | H1(ref)<br>H2(test) | H2(ref)<br>H1(test) | H1(ref)<br>AI(test) | H2(ref)<br>AI(test) |
| False Negative Area (%) | 8.1                 | 6.7                 | 1.7                 | 4.8                 |
| False Positive Area (%) | 6.6                 | 8.2                 | 131.0               | 137.5               |
| Relative Error (%)      | 1.5                 | 1.5                 | 129.3               | 132.7               |

| Blinded Attending Surgeon Review |              |                      |                      |                      |              |                         |
|----------------------------------|--------------|----------------------|----------------------|----------------------|--------------|-------------------------|
| Reviewer                         | PGT Estimate | H1 meets definition? | H2 meets definition? | AI meets definition? | Which is AI? | Which is most accurate? |
| 1                                | 0            | Yes                  | Yes                  | No                   | H2           | H1                      |
| 2                                | 70           | Yes                  | Yes                  | Yes                  | H1           | H1                      |
| 3                                | 10           | Yes                  | Yes                  | No                   | H2           | H2                      |

| Wound EMR Information |        |     |            |                |                   |                  |                  |                               |
|-----------------------|--------|-----|------------|----------------|-------------------|------------------|------------------|-------------------------------|
| Sequential Number     | Gender | Age | Wound Type | Wound Location | Wound Length (cm) | Wound Width (cm) | Wound Depth (cm) | Wound Area (cm <sup>2</sup> ) |
| 33                    | F      | 72  | Pressure   | Heel           | 8.0               | 6.0              | 1.5              | 48.00                         |

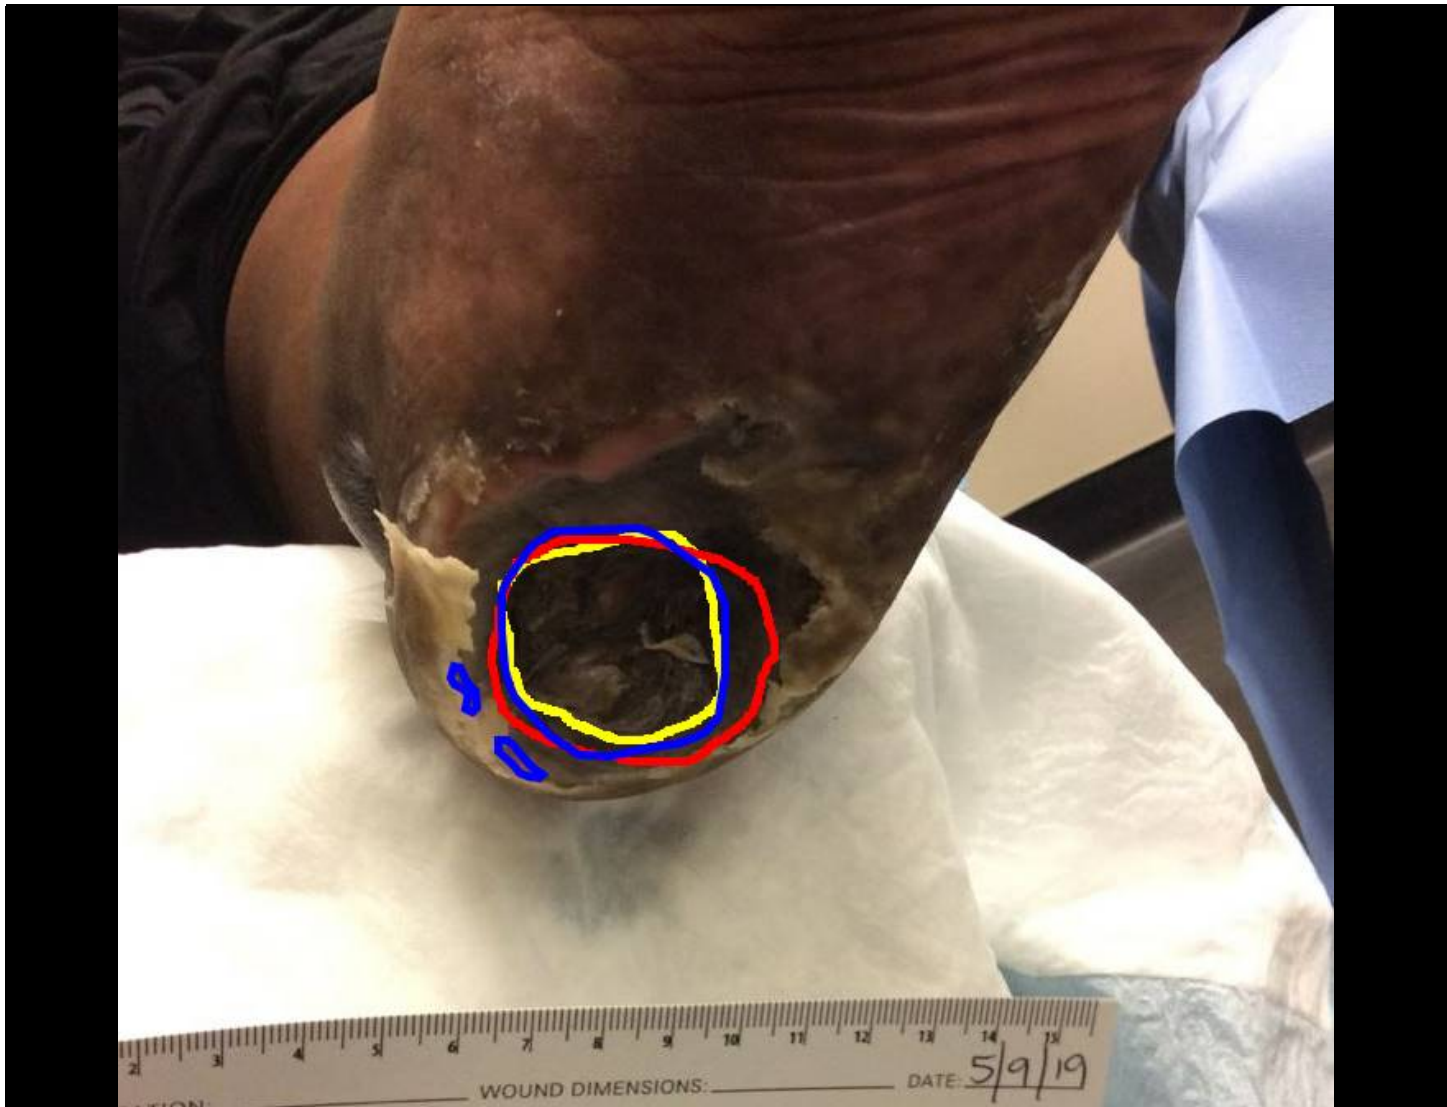

| Tracing Data |                               |                           |                               |
|--------------|-------------------------------|---------------------------|-------------------------------|
| Tracer:      | Wound Area (px <sup>2</sup> ) | Ruler Calibration (px/cm) | Wound Area (cm <sup>2</sup> ) |
| H1           | 13352                         | 42.1                      | 7.52                          |
| H2           | 18956                         | 42.9                      | 10.31                         |
| AI           | 16175                         | 39.4                      | 10.40                         |

| Tracing Comparisons     |                     |                     |                     |                     |
|-------------------------|---------------------|---------------------|---------------------|---------------------|
| Difference Metric:      | Human-Human         |                     | Human-AI            |                     |
|                         | H1(ref)<br>H2(test) | H2(ref)<br>H1(test) | H1(ref)<br>AI(test) | H2(ref)<br>AI(test) |
| False Negative Area (%) | 1.6                 | 30.7                | 1.1                 | 19.6                |
| False Positive Area (%) | 43.6                | 1.1                 | 22.3                | 5.0                 |
| Relative Error (%)      | 42.0                | 29.6                | 21.1                | 14.7                |

| Blinded Attending Surgeon Review |              |                      |                      |                      |              |                         |
|----------------------------------|--------------|----------------------|----------------------|----------------------|--------------|-------------------------|
| Reviewer                         | PGT Estimate | H1 meets definition? | H2 meets definition? | AI meets definition? | Which is AI? | Which is most accurate? |
| 1                                | 0            | No                   | No                   | No                   | H2           | H1                      |
| 2                                | 10           | No                   | Yes                  | No                   | H2           | H2                      |
| 3                                | 0            | Yes                  | No                   | Yes                  | AI           | H2                      |

| Wound EMR Information |        |     |             |                  |                   |                  |                  |                               |
|-----------------------|--------|-----|-------------|------------------|-------------------|------------------|------------------|-------------------------------|
| Sequential Number     | Gender | Age | Wound Type  | Wound Location   | Wound Length (cm) | Wound Width (cm) | Wound Depth (cm) | Wound Area (cm <sup>2</sup> ) |
| 34                    | F      | 52  | Dermatologi | Thigh-Hamstrings |                   |                  |                  |                               |

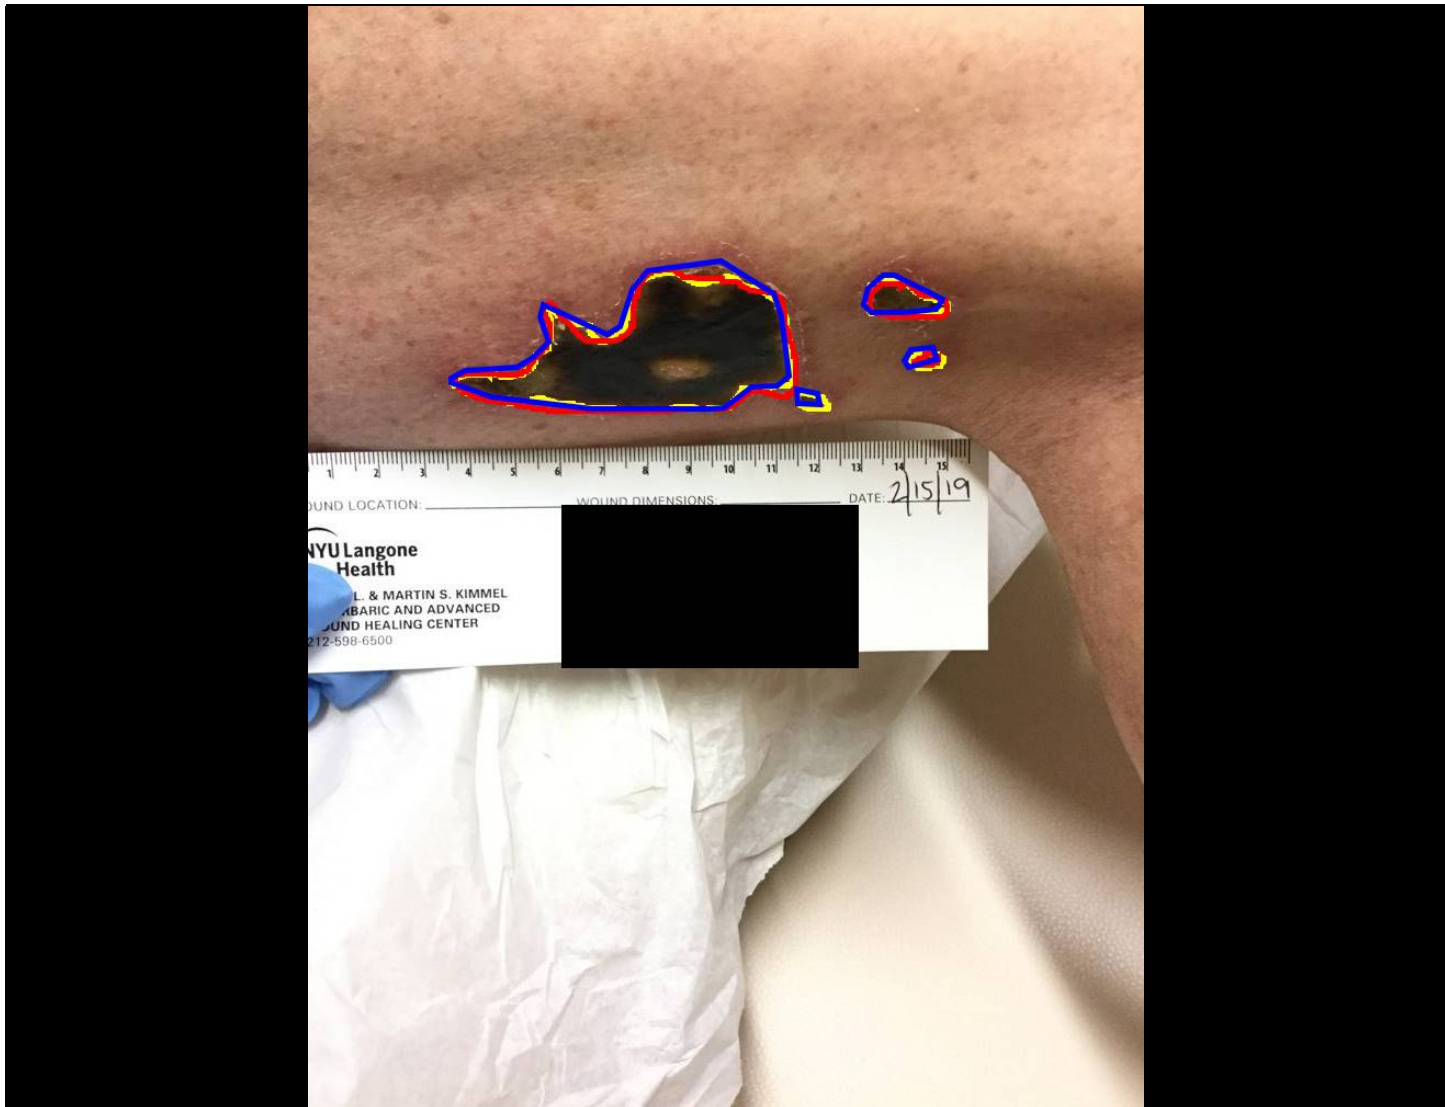

| Tracing Data |                               |                           |                               |
|--------------|-------------------------------|---------------------------|-------------------------------|
| Tracer:      | Wound Area (px <sup>2</sup> ) | Ruler Calibration (px/cm) | Wound Area (cm <sup>2</sup> ) |
| H1           | 25279                         | 39.1                      | 16.53                         |
| H2           | 25802                         | 40.2                      | 15.98                         |
| AI           | 27146                         | 42.8                      | 14.80                         |

| Tracing Comparisons     |                     |                     |                     |                     |
|-------------------------|---------------------|---------------------|---------------------|---------------------|
| Difference Metric:      | Human-Human         |                     | Human-AI            |                     |
|                         | H1(ref)<br>H2(test) | H2(ref)<br>H1(test) | H1(ref)<br>AI(test) | H2(ref)<br>AI(test) |
| False Negative Area (%) | 5.1                 | 7.0                 | 3.9                 | 6.9                 |
| False Positive Area (%) | 7.2                 | 5.0                 | 11.2                | 12.1                |
| Relative Error (%)      | 2.1                 | 2.0                 | 7.4                 | 5.2                 |

| Blinded Attending Surgeon Review |              |                      |                      |                      |              |                         |
|----------------------------------|--------------|----------------------|----------------------|----------------------|--------------|-------------------------|
| Reviewer                         | PGT Estimate | H1 meets definition? | H2 meets definition? | AI meets definition? | Which is AI? | Which is most accurate? |
| 1                                | 0            | Yes                  | Yes                  | Yes                  | H2           | H1                      |
| 2                                | 10           | Yes                  | Yes                  | Yes                  | AI           | AI                      |
| 3                                | 0            | Yes                  | Yes                  | Yes                  | H2           | AI                      |

| Wound EMR Information |        |     |            |                |                   |                  |                  |                               |
|-----------------------|--------|-----|------------|----------------|-------------------|------------------|------------------|-------------------------------|
| Sequential Number     | Gender | Age | Wound Type | Wound Location | Wound Length (cm) | Wound Width (cm) | Wound Depth (cm) | Wound Area (cm <sup>2</sup> ) |
| 35                    | F      | 36  | Abscess    | Right Abdomen  |                   |                  |                  |                               |

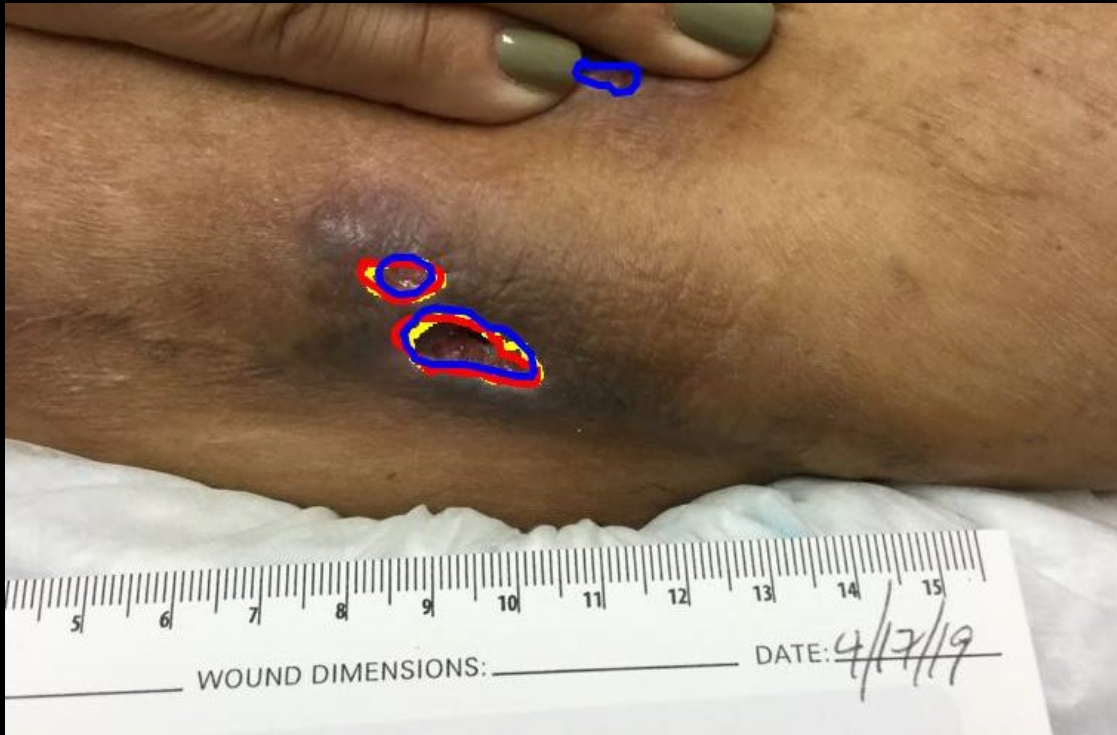

| Tracing Data |                               |                           |                               |
|--------------|-------------------------------|---------------------------|-------------------------------|
| Tracer:      | Wound Area (px <sup>2</sup> ) | Ruler Calibration (px/cm) | Wound Area (cm <sup>2</sup> ) |
| H1           | 3242                          | 56.7                      | 1.01                          |
| H2           | 3440                          | 57.2                      | 1.05                          |
| AI           | 3858                          | 56.7                      | 1.20                          |

| Tracing Comparisons     |                     |                     |                     |                     |
|-------------------------|---------------------|---------------------|---------------------|---------------------|
| Difference Metric:      | Human-Human         |                     | Human-AI            |                     |
|                         | H1(ref)<br>H2(test) | H2(ref)<br>H1(test) | H1(ref)<br>AI(test) | H2(ref)<br>AI(test) |
| False Negative Area (%) | 9.7                 | 14.9                | 15.7                | 23.5                |
| False Positive Area (%) | 15.8                | 9.1                 | 34.7                | 35.6                |
| Relative Error (%)      | 6.1                 | 5.8                 | 19.0                | 12.2                |

| Blinded Attending Surgeon Review |              |                      |                      |                      |              |                         |
|----------------------------------|--------------|----------------------|----------------------|----------------------|--------------|-------------------------|
| Reviewer                         | PGT Estimate | H1 meets definition? | H2 meets definition? | AI meets definition? | Which is AI? | Which is most accurate? |
| 1                                | 80           | Yes                  | Yes                  | Yes                  | H2           | H1                      |
| 2                                | 100          | Yes                  | Yes                  | Yes                  | H2           | H2                      |
| 3                                | 90           | Yes                  | Yes                  | Yes                  | H2           | H2                      |

| Wound EMR Information |        |     |            |                |                   |                  |                  |                               |
|-----------------------|--------|-----|------------|----------------|-------------------|------------------|------------------|-------------------------------|
| Sequential Number     | Gender | Age | Wound Type | Wound Location | Wound Length (cm) | Wound Width (cm) | Wound Depth (cm) | Wound Area (cm <sup>2</sup> ) |
| 36                    | F      | 79  | Tumor/Canc | Breast         | 6.0               | 6.0              |                  | 36.00                         |

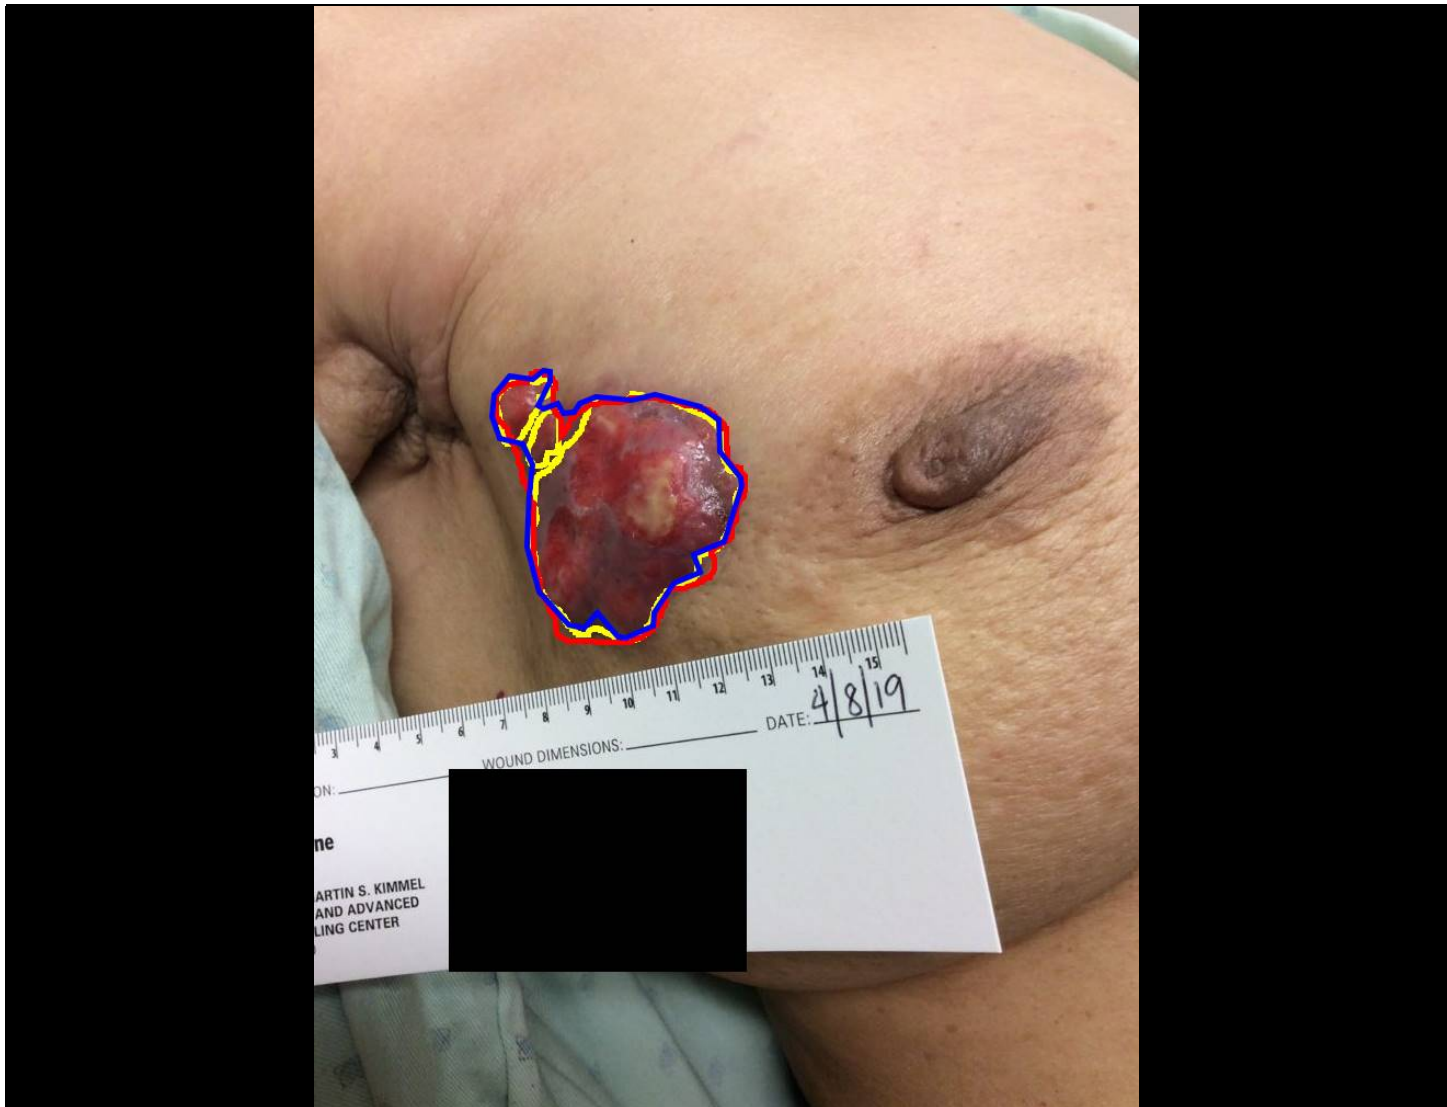

| Tracing Data |                               |                           |                               |
|--------------|-------------------------------|---------------------------|-------------------------------|
| Tracer:      | Wound Area (px <sup>2</sup> ) | Ruler Calibration (px/cm) | Wound Area (cm <sup>2</sup> ) |
| H1           | 33008                         | 41.0                      | 19.65                         |
| H2           | 36635                         | 42.5                      | 20.29                         |
| AI           | 34916                         | 53.3                      | 12.30                         |

| Tracing Comparisons     |                     |                     |                     |                     |
|-------------------------|---------------------|---------------------|---------------------|---------------------|
| Difference Metric:      | Human-Human         |                     | Human-AI            |                     |
|                         | H1(ref)<br>H2(test) | H2(ref)<br>H1(test) | H1(ref)<br>AI(test) | H2(ref)<br>AI(test) |
| False Negative Area (%) | 1.0                 | 10.8                | 2.1                 | 7.9                 |
| False Positive Area (%) | 11.9                | 0.9                 | 7.9                 | 3.2                 |
| Relative Error (%)      | 11.0                | 9.9                 | 5.8                 | 4.7                 |

| Blinded Attending Surgeon Review |              |                      |                      |                      |              |                         |
|----------------------------------|--------------|----------------------|----------------------|----------------------|--------------|-------------------------|
| Reviewer                         | PGT Estimate | H1 meets definition? | H2 meets definition? | AI meets definition? | Which is AI? | Which is most accurate? |
| 1                                | 90           | Yes                  | No                   | No                   | H2           | AI                      |
| 2                                | 90           | Yes                  | Yes                  | Yes                  | AI           | AI                      |
| 3                                | 80           | Yes                  | Yes                  | Yes                  | AI           | H2                      |

| Wound EMR Information |        |     |            |                |                   |                  |                  |                               |
|-----------------------|--------|-----|------------|----------------|-------------------|------------------|------------------|-------------------------------|
| Sequential Number     | Gender | Age | Wound Type | Wound Location | Wound Length (cm) | Wound Width (cm) | Wound Depth (cm) | Wound Area (cm <sup>2</sup> ) |
| 37                    | F      | 67  | Surgical   | Foot-Dorsum    | 0.5               | 0.1              |                  | 0.05                          |

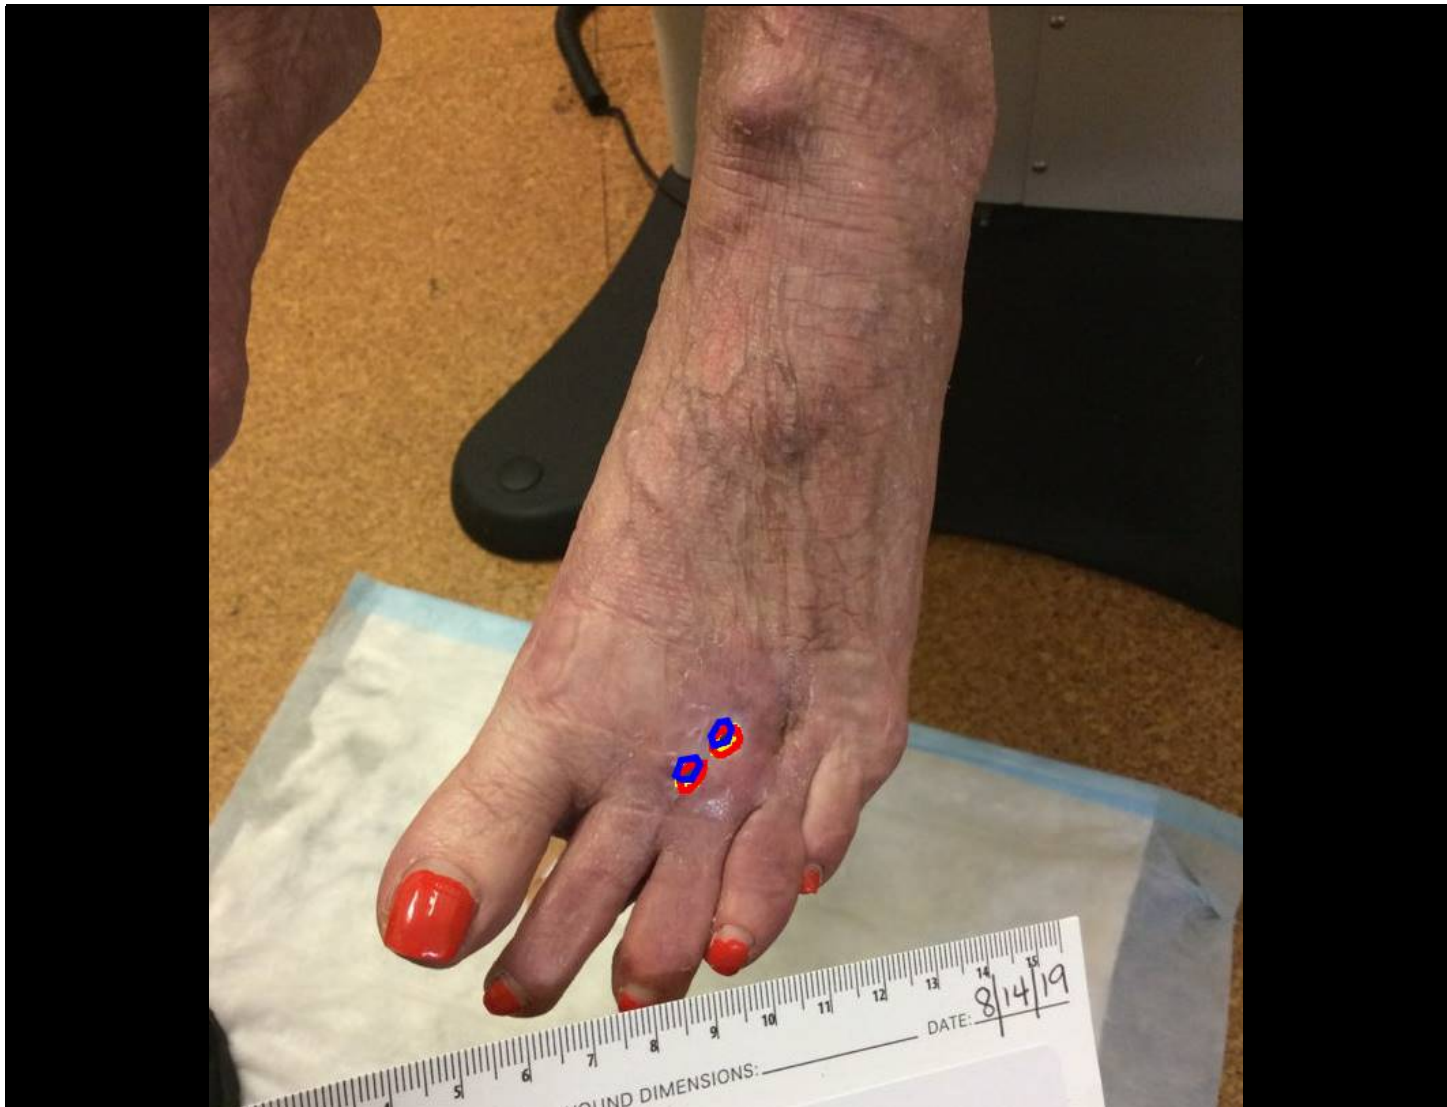

| Tracing Data |                               |                           |                               |
|--------------|-------------------------------|---------------------------|-------------------------------|
| Tracer:      | Wound Area (px <sup>2</sup> ) | Ruler Calibration (px/cm) | Wound Area (cm <sup>2</sup> ) |
| H1           | 485                           | 43.9                      | 0.25                          |
| H2           | 535                           | 48.0                      | 0.23                          |
| AI           | 376                           | 35.4                      | 0.30                          |

| Tracing Comparisons     |                     |                     |                     |                     |
|-------------------------|---------------------|---------------------|---------------------|---------------------|
| Difference Metric:      | Human-Human         |                     | Human-AI            |                     |
|                         | H1(ref)<br>H2(test) | H2(ref)<br>H1(test) | H1(ref)<br>AI(test) | H2(ref)<br>AI(test) |
| False Negative Area (%) | 10.9                | 19.3                | 45.6                | 57.2                |
| False Positive Area (%) | 21.2                | 9.9                 | 23.1                | 27.5                |
| Relative Error (%)      | 10.3                | 9.3                 | 22.5                | 29.7                |

| Blinded Attending Surgeon Review |              |                      |                      |                      |              |                         |
|----------------------------------|--------------|----------------------|----------------------|----------------------|--------------|-------------------------|
| Reviewer                         | PGT Estimate | H1 meets definition? | H2 meets definition? | AI meets definition? | Which is AI? | Which is most accurate? |
| 1                                | 0            | Yes                  | Yes                  | Yes                  | H2           | H1                      |
| 2                                | 50           | Yes                  | Yes                  | Yes                  | H2           | AI                      |
| 3                                | 100          | Yes                  | Yes                  | No                   | H2           | H1                      |



| Wound EMR Information |        |     |            |                |                   |                  |                  |                               |
|-----------------------|--------|-----|------------|----------------|-------------------|------------------|------------------|-------------------------------|
| Sequential Number     | Gender | Age | Wound Type | Wound Location | Wound Length (cm) | Wound Width (cm) | Wound Depth (cm) | Wound Area (cm <sup>2</sup> ) |
| 38                    | M      | 32  | Burn       | Right medial   | 10.2              | 6.5              | 0.3              | 66.30                         |

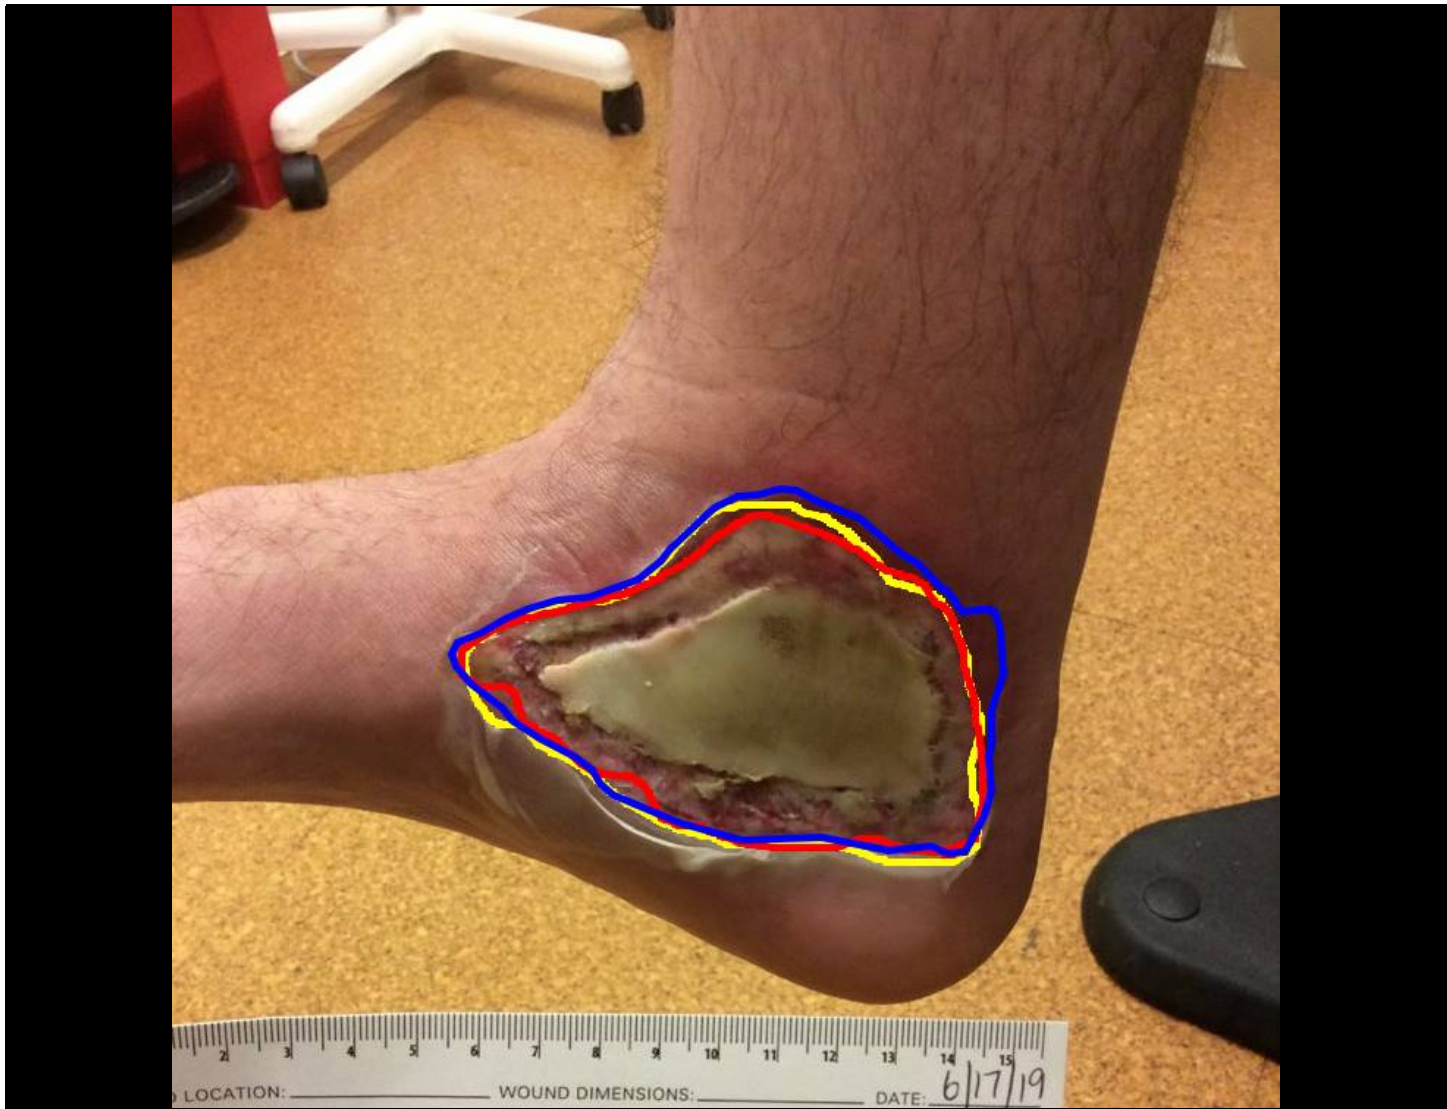

| Tracing Data |                               |                           |                               |
|--------------|-------------------------------|---------------------------|-------------------------------|
| Tracer:      | Wound Area (px <sup>2</sup> ) | Ruler Calibration (px/cm) | Wound Area (cm <sup>2</sup> ) |
| H1           | 57592                         | 40.3                      | 35.54                         |
| H2           | 53704                         | 67.2                      | 11.88                         |
| AI           | 61186                         | 45.0                      | 30.20                         |

| Tracing Comparisons     |                     |                     |                     |                     |
|-------------------------|---------------------|---------------------|---------------------|---------------------|
| Difference Metric:      | Human-Human         |                     | Human-AI            |                     |
|                         | H1(ref)<br>H2(test) | H2(ref)<br>H1(test) | H1(ref)<br>AI(test) | H2(ref)<br>AI(test) |
| False Negative Area (%) | 7.9                 | 1.2                 | 2.6                 | 0.8                 |
| False Positive Area (%) | 1.1                 | 8.4                 | 8.9                 | 14.7                |
| Relative Error (%)      | 6.8                 | 7.2                 | 6.2                 | 13.9                |

| Blinded Attending Surgeon Review |              |                      |                      |                      |              |                         |
|----------------------------------|--------------|----------------------|----------------------|----------------------|--------------|-------------------------|
| Reviewer                         | PGT Estimate | H1 meets definition? | H2 meets definition? | AI meets definition? | Which is AI? | Which is most accurate? |
| 1                                | 10           | Yes                  | Yes                  | No                   | H1           | H2                      |
| 2                                | 30           | Yes                  | Yes                  | Yes                  | H2           | H2                      |
| 3                                | 10           | Yes                  | Yes                  | Yes                  | H2           | H2                      |

| Wound EMR Information |        |     |            |                |                   |                  |                  |                               |
|-----------------------|--------|-----|------------|----------------|-------------------|------------------|------------------|-------------------------------|
| Sequential Number     | Gender | Age | Wound Type | Wound Location | Wound Length (cm) | Wound Width (cm) | Wound Depth (cm) | Wound Area (cm <sup>2</sup> ) |
| 39                    | F      | 53  | Surgical   | Ankle          |                   |                  |                  |                               |

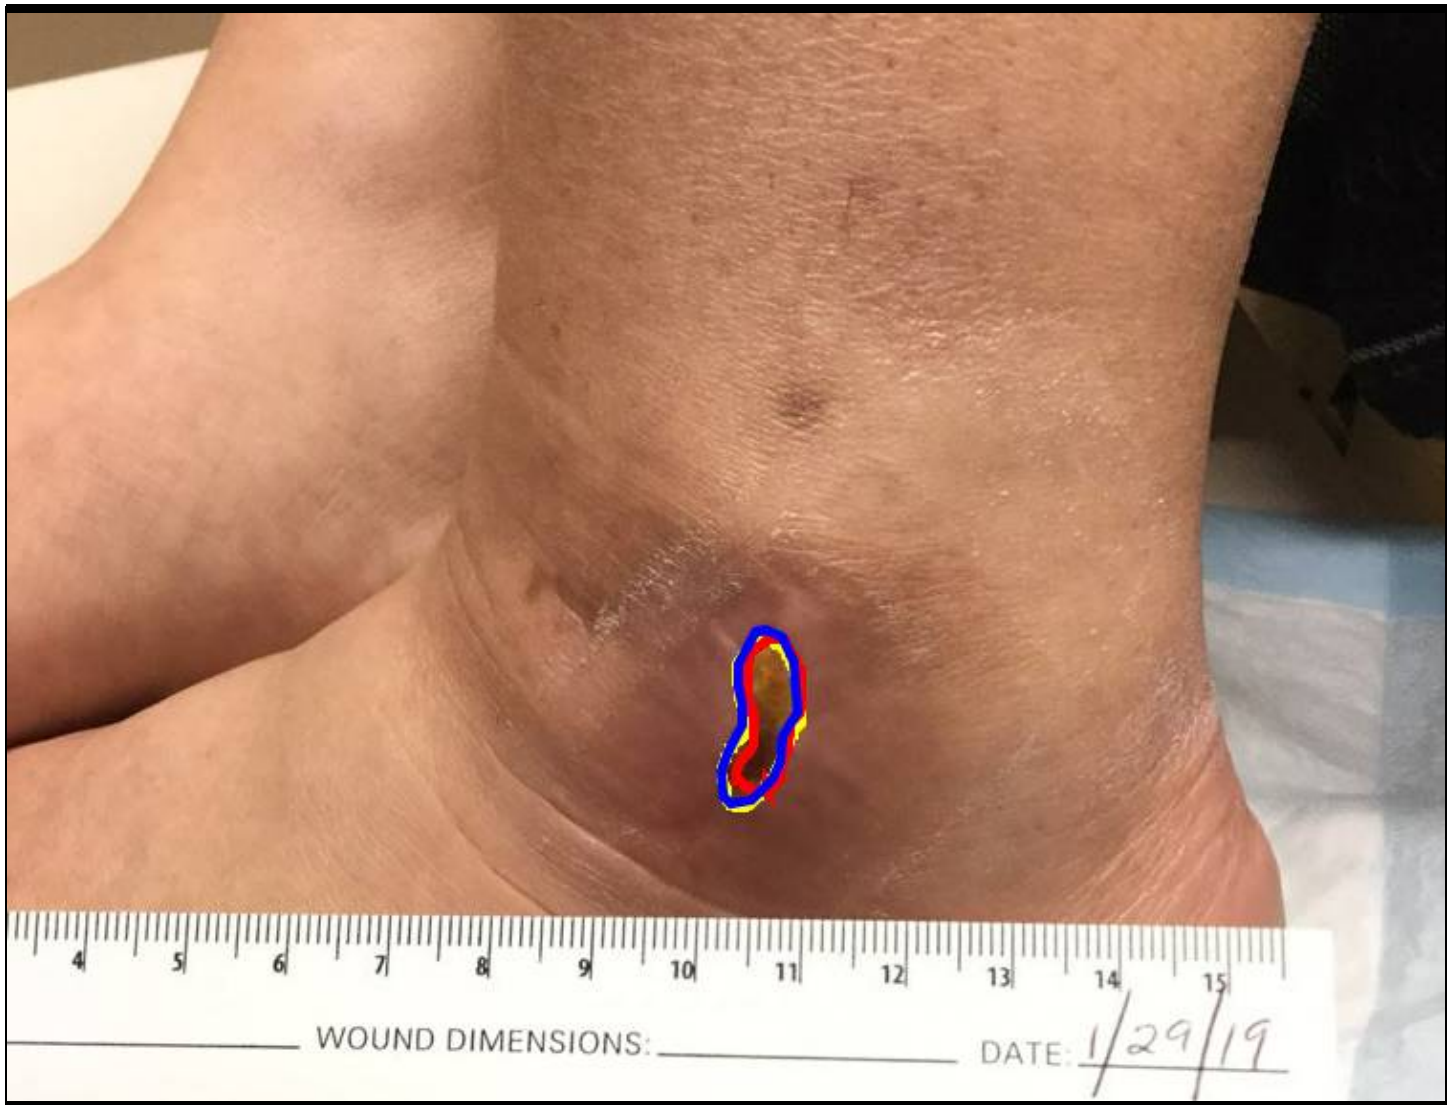

| Tracing Data |                               |                           |                               |
|--------------|-------------------------------|---------------------------|-------------------------------|
| Tracer:      | Wound Area (px <sup>2</sup> ) | Ruler Calibration (px/cm) | Wound Area (cm <sup>2</sup> ) |
| H1           | 2294                          | 55.5                      | 0.75                          |
| H2           | 1751                          | 54.0                      | 0.60                          |
| AI           | 2299                          | 53.6                      | 0.80                          |

| Tracing Comparisons     |                     |                     |                     |                     |
|-------------------------|---------------------|---------------------|---------------------|---------------------|
| Difference Metric:      | Human-Human         |                     | Human-AI            |                     |
|                         | H1(ref)<br>H2(test) | H2(ref)<br>H1(test) | H1(ref)<br>AI(test) | H2(ref)<br>AI(test) |
| False Negative Area (%) | 29.3                | 7.4                 | 7.1                 | 7.3                 |
| False Positive Area (%) | 5.6                 | 38.4                | 7.3                 | 38.6                |
| Relative Error (%)      | 23.7                | 31.0                | 0.2                 | 31.3                |

| Blinded Attending Surgeon Review |              |                      |                      |                      |              |                         |
|----------------------------------|--------------|----------------------|----------------------|----------------------|--------------|-------------------------|
| Reviewer                         | PGT Estimate | H1 meets definition? | H2 meets definition? | AI meets definition? | Which is AI? | Which is most accurate? |
| 1                                | 100          | No                   | No                   | No                   | H2           | AI                      |
| 2                                | 70           | Yes                  | Yes                  | Yes                  | AI           | H1                      |
| 3                                | 10           | Yes                  | Yes                  | Yes                  | H2           | AI                      |

| Wound EMR Information |        |     |            |                |                   |                  |                  |                               |
|-----------------------|--------|-----|------------|----------------|-------------------|------------------|------------------|-------------------------------|
| Sequential Number     | Gender | Age | Wound Type | Wound Location | Wound Length (cm) | Wound Width (cm) | Wound Depth (cm) | Wound Area (cm <sup>2</sup> ) |
| 40                    | F      | 68  | Venous     | Leg-Ankle      |                   |                  |                  |                               |

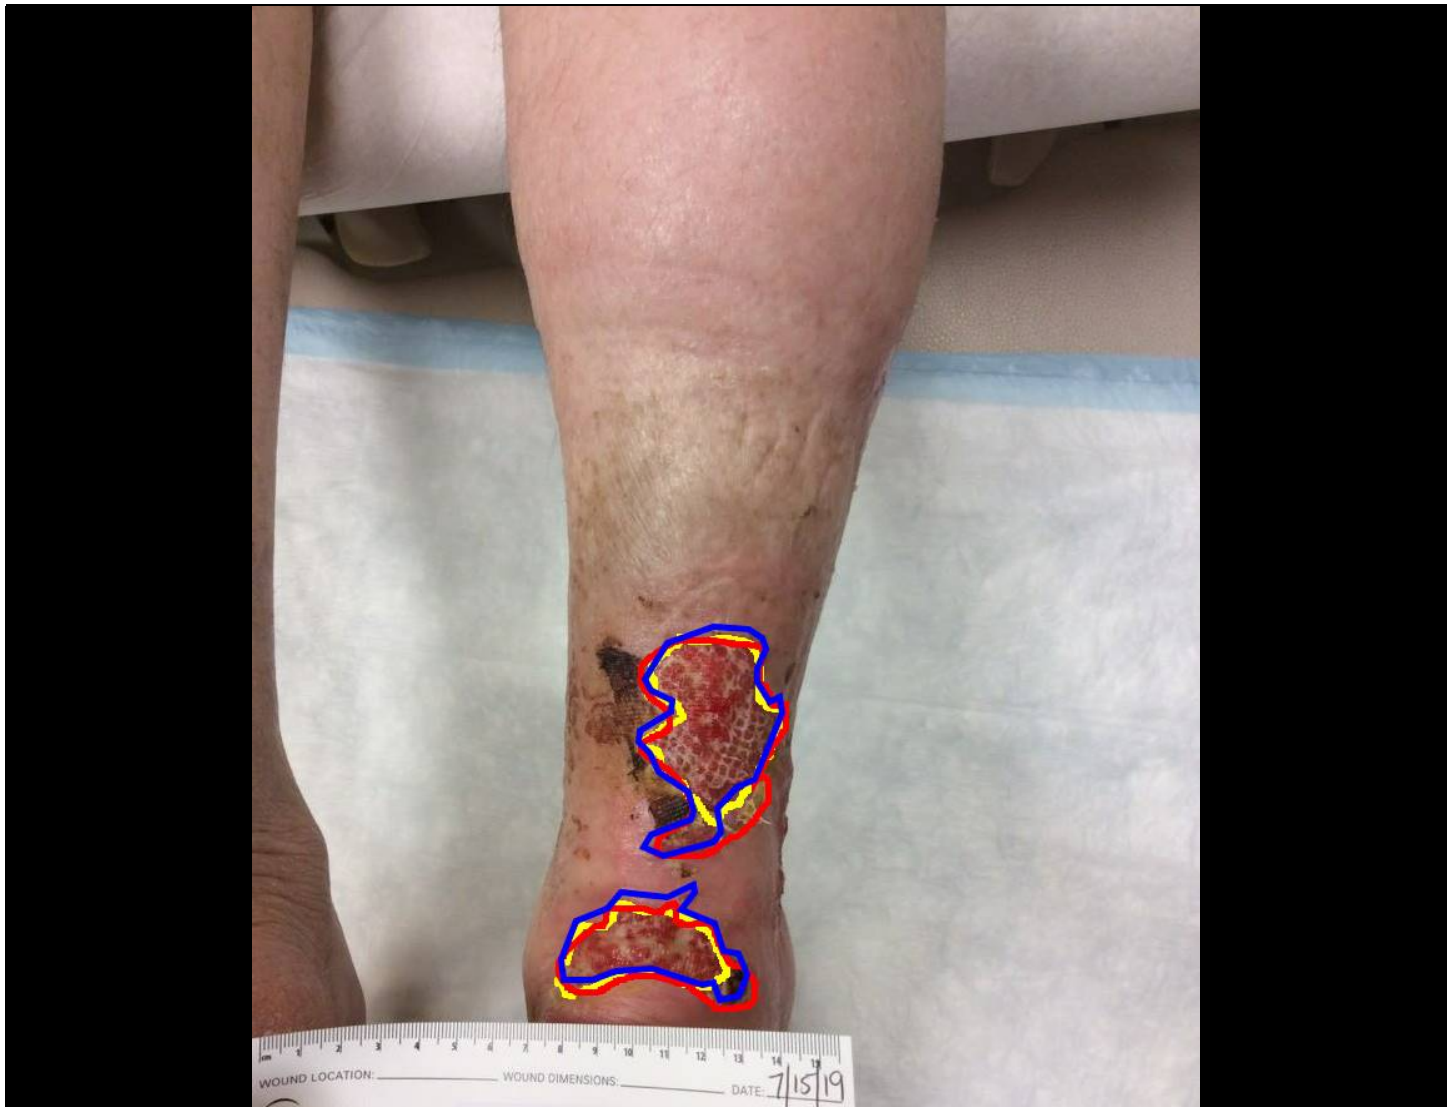

| Tracing Data |                               |                           |                               |
|--------------|-------------------------------|---------------------------|-------------------------------|
| Tracer:      | Wound Area (px <sup>2</sup> ) | Ruler Calibration (px/cm) | Wound Area (cm <sup>2</sup> ) |
| H1           | 16519                         | 28.3                      | 20.60                         |
| H2           | 21055                         | 35.8                      | 16.43                         |
| AI           | 20240                         | 32.0                      | 19.80                         |

| Tracing Comparisons     |                     |                     |                     |                     |
|-------------------------|---------------------|---------------------|---------------------|---------------------|
| Difference Metric:      | Human-Human         |                     | Human-AI            |                     |
|                         | H1(ref)<br>H2(test) | H2(ref)<br>H1(test) | H1(ref)<br>AI(test) | H2(ref)<br>AI(test) |
| False Negative Area (%) | 3.1                 | 24.0                | 6.2                 | 16.6                |
| False Positive Area (%) | 30.5                | 2.4                 | 28.7                | 12.7                |
| Relative Error (%)      | 27.5                | 21.5                | 22.5                | 3.9                 |

| Blinded Attending Surgeon Review |              |                      |                      |                      |              |                         |
|----------------------------------|--------------|----------------------|----------------------|----------------------|--------------|-------------------------|
| Reviewer                         | PGT Estimate | H1 meets definition? | H2 meets definition? | AI meets definition? | Which is AI? | Which is most accurate? |
| 1                                | 100          | Yes                  | Yes                  | Yes                  | H2           | H2                      |
| 2                                | 50           | Yes                  | Yes                  | Yes                  | H2           | H2                      |
| 3                                | 70           | No                   | Yes                  | Yes                  | AI           | AI                      |

| Wound EMR Information |        |     |            |                |                   |                  |                  |                               |
|-----------------------|--------|-----|------------|----------------|-------------------|------------------|------------------|-------------------------------|
| Sequential Number     | Gender | Age | Wound Type | Wound Location | Wound Length (cm) | Wound Width (cm) | Wound Depth (cm) | Wound Area (cm <sup>2</sup> ) |
| 41                    | F      | 31  | Surgical   | Abdomen        |                   |                  |                  |                               |

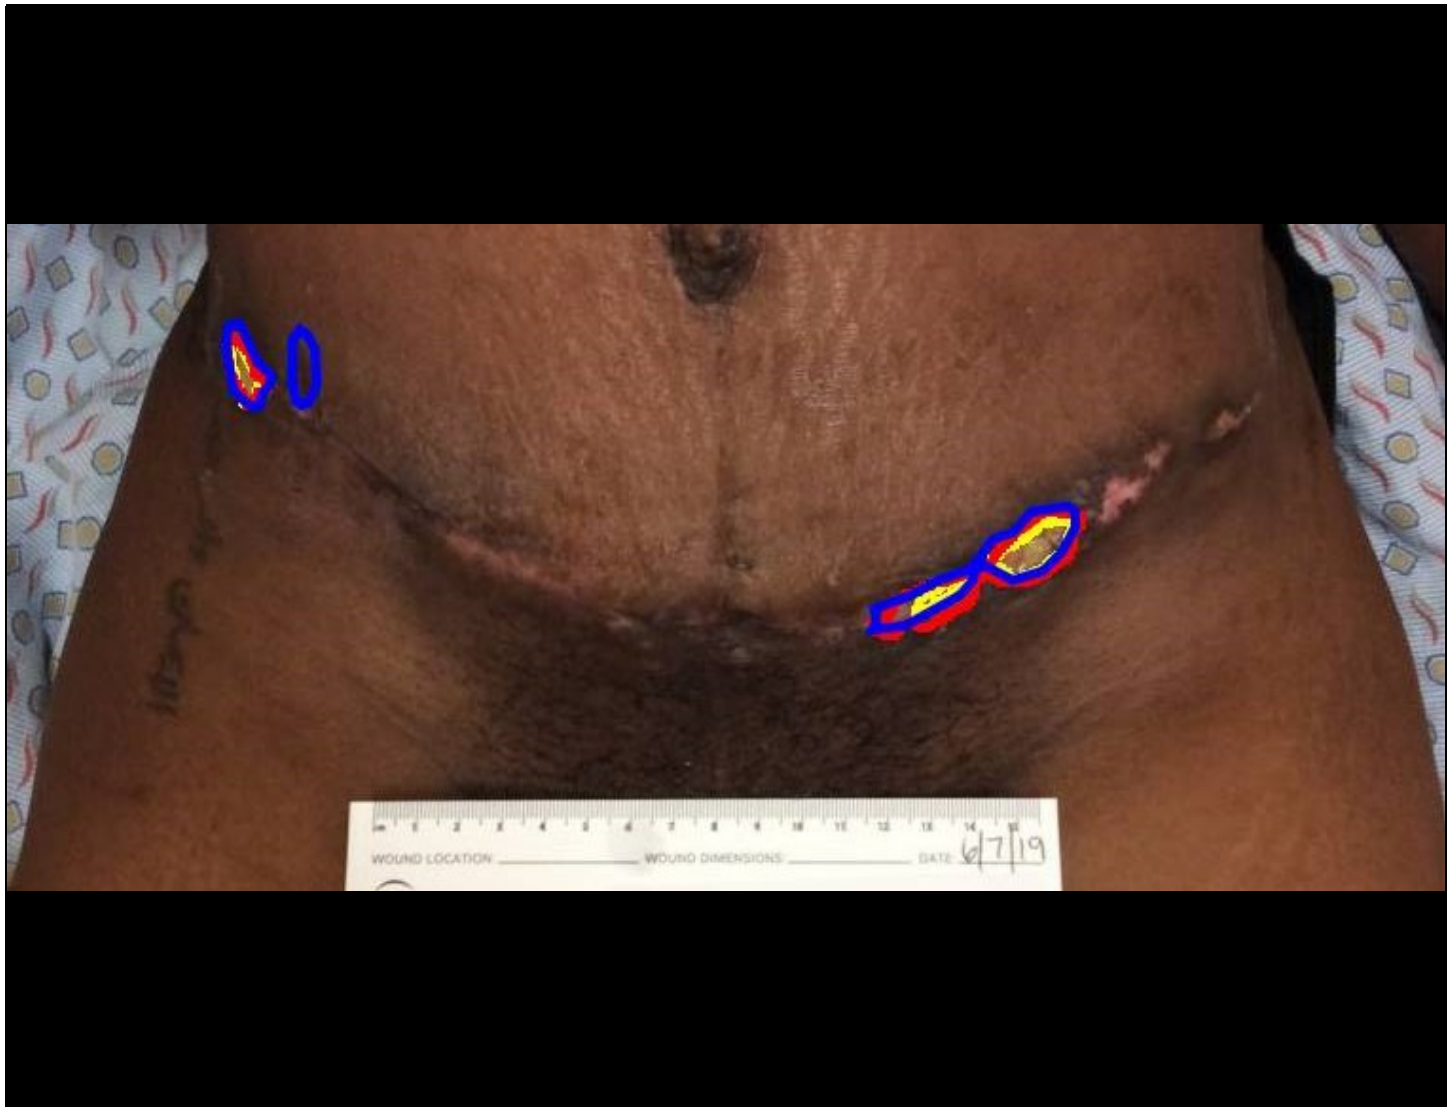

| Tracing Data |                               |                           |                               |
|--------------|-------------------------------|---------------------------|-------------------------------|
| Tracer:      | Wound Area (px <sup>2</sup> ) | Ruler Calibration (px/cm) | Wound Area (cm <sup>2</sup> ) |
| H1           | 1235                          | 22.7                      | 2.39                          |
| H2           | 2393                          | 28.0                      | 3.05                          |
| AI           | 2860                          | 24.7                      | 4.70                          |

| Tracing Comparisons     |                     |                     |                     |                     |
|-------------------------|---------------------|---------------------|---------------------|---------------------|
| Difference Metric:      | Human-Human         |                     | Human-AI            |                     |
|                         | H1(ref)<br>H2(test) | H2(ref)<br>H1(test) | H1(ref)<br>AI(test) | H2(ref)<br>AI(test) |
| False Negative Area (%) | 0.6                 | 48.7                | 0.6                 | 18.1                |
| False Positive Area (%) | 94.3                | 0.3                 | 132.2               | 37.7                |
| Relative Error (%)      | 93.8                | 48.4                | 131.6               | 19.5                |

| Blinded Attending Surgeon Review |              |                      |                      |                      |              |                         |
|----------------------------------|--------------|----------------------|----------------------|----------------------|--------------|-------------------------|
| Reviewer                         | PGT Estimate | H1 meets definition? | H2 meets definition? | AI meets definition? | Which is AI? | Which is most accurate? |
| 1                                | 80           | Yes                  | Yes                  | Yes                  | AI           | H2                      |
| 2                                | 70           | Yes                  | Yes                  | Yes                  | H2           | H2                      |
| 3                                | 20           | Yes                  | No                   | No                   | H1           | H2                      |

| Wound EMR Information |        |     |            |                |                   |                  |                  |                               |
|-----------------------|--------|-----|------------|----------------|-------------------|------------------|------------------|-------------------------------|
| Sequential Number     | Gender | Age | Wound Type | Wound Location | Wound Length (cm) | Wound Width (cm) | Wound Depth (cm) | Wound Area (cm <sup>2</sup> ) |
| 42                    | M      | 56  | Pressure   | Hip-R          |                   |                  |                  |                               |

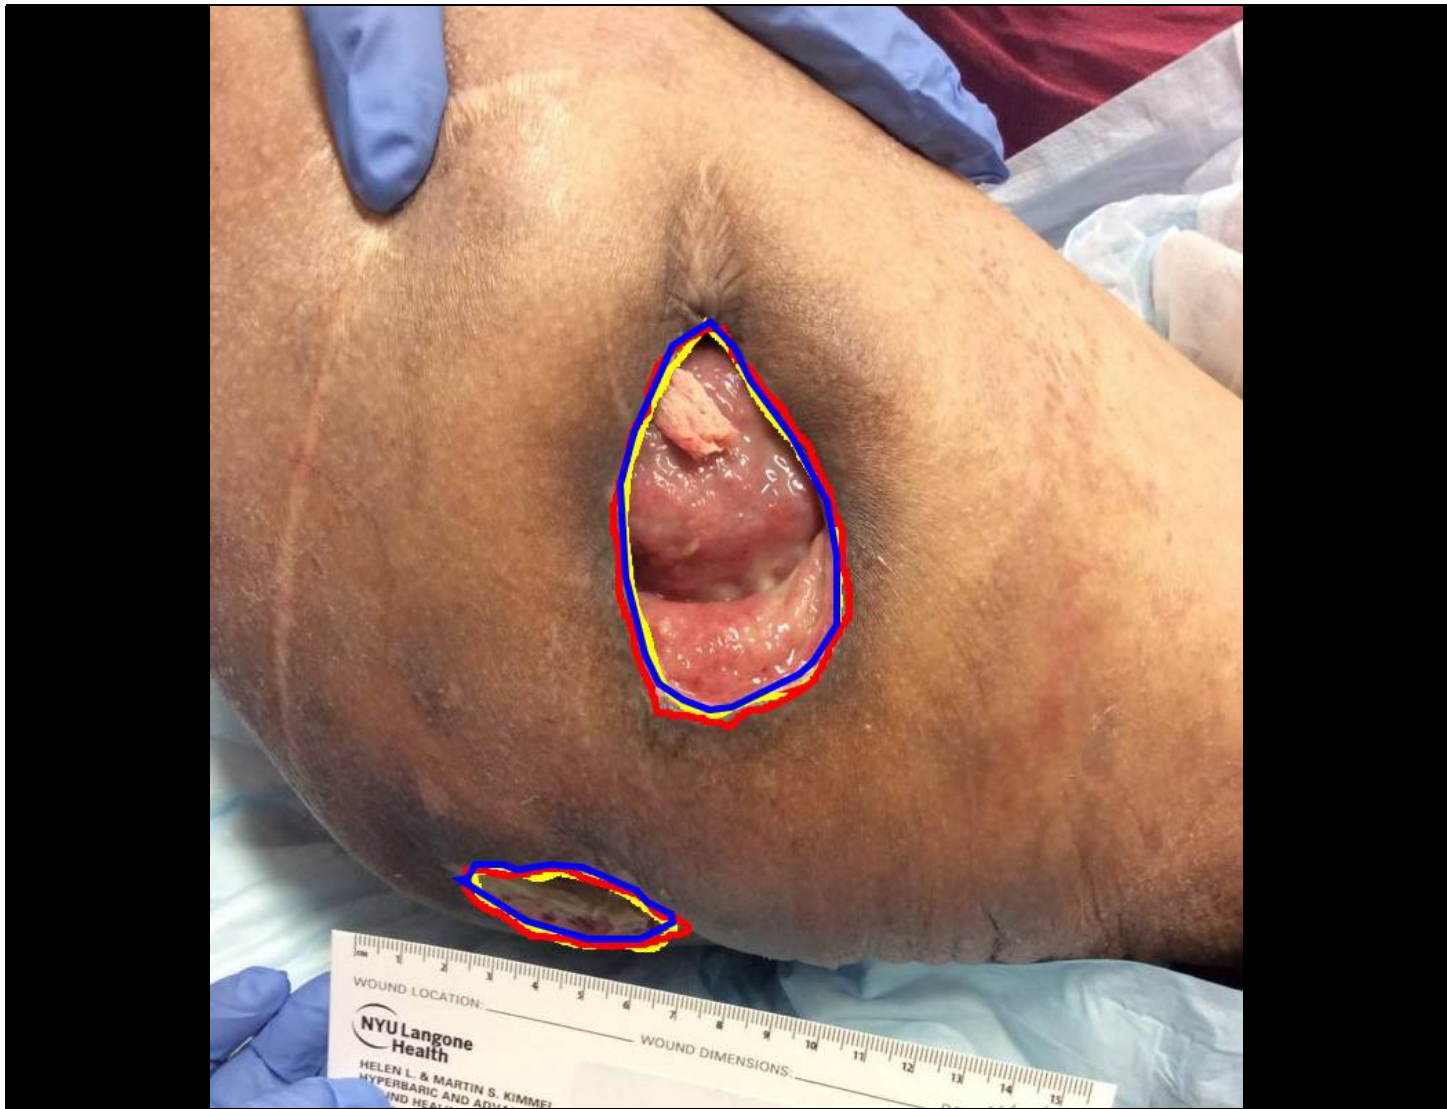

| Tracing Data |                               |                           |                               |
|--------------|-------------------------------|---------------------------|-------------------------------|
| Tracer:      | Wound Area (px <sup>2</sup> ) | Ruler Calibration (px/cm) | Wound Area (cm <sup>2</sup> ) |
| H1           | 36016                         | 34.9                      | 29.59                         |
| H2           | 40714                         | 28.5                      | 50.06                         |
| AI           | 36700                         | 36.1                      | 28.20                         |

| Tracing Comparisons     |                     |                     |                     |                     |
|-------------------------|---------------------|---------------------|---------------------|---------------------|
| Difference Metric:      | Human-Human         |                     | Human-AI            |                     |
|                         | H1(ref)<br>H2(test) | H2(ref)<br>H1(test) | H1(ref)<br>AI(test) | H2(ref)<br>AI(test) |
| False Negative Area (%) | 0.6                 | 12.0                | 3.9                 | 11.5                |
| False Positive Area (%) | 13.6                | 0.5                 | 5.8                 | 1.6                 |
| Relative Error (%)      | 13.0                | 11.5                | 1.9                 | 9.9                 |

| Blinded Attending Surgeon Review |              |                      |                      |                      |              |                         |
|----------------------------------|--------------|----------------------|----------------------|----------------------|--------------|-------------------------|
| Reviewer                         | PGT Estimate | H1 meets definition? | H2 meets definition? | AI meets definition? | Which is AI? | Which is most accurate? |
| 1                                | 90           | Yes                  | Yes                  | Yes                  | H2           | H1                      |
| 2                                | 100          | Yes                  | Yes                  | Yes                  | AI           | AI                      |
| 3                                | 90           | Yes                  | Yes                  | Yes                  | H2           | AI                      |

| Wound EMR Information |        |     |            |                |                   |                  |                  |                               |
|-----------------------|--------|-----|------------|----------------|-------------------|------------------|------------------|-------------------------------|
| Sequential Number     | Gender | Age | Wound Type | Wound Location | Wound Length (cm) | Wound Width (cm) | Wound Depth (cm) | Wound Area (cm <sup>2</sup> ) |
| 43                    | M      | 56  | Pressure   | Sacrum         |                   |                  |                  |                               |

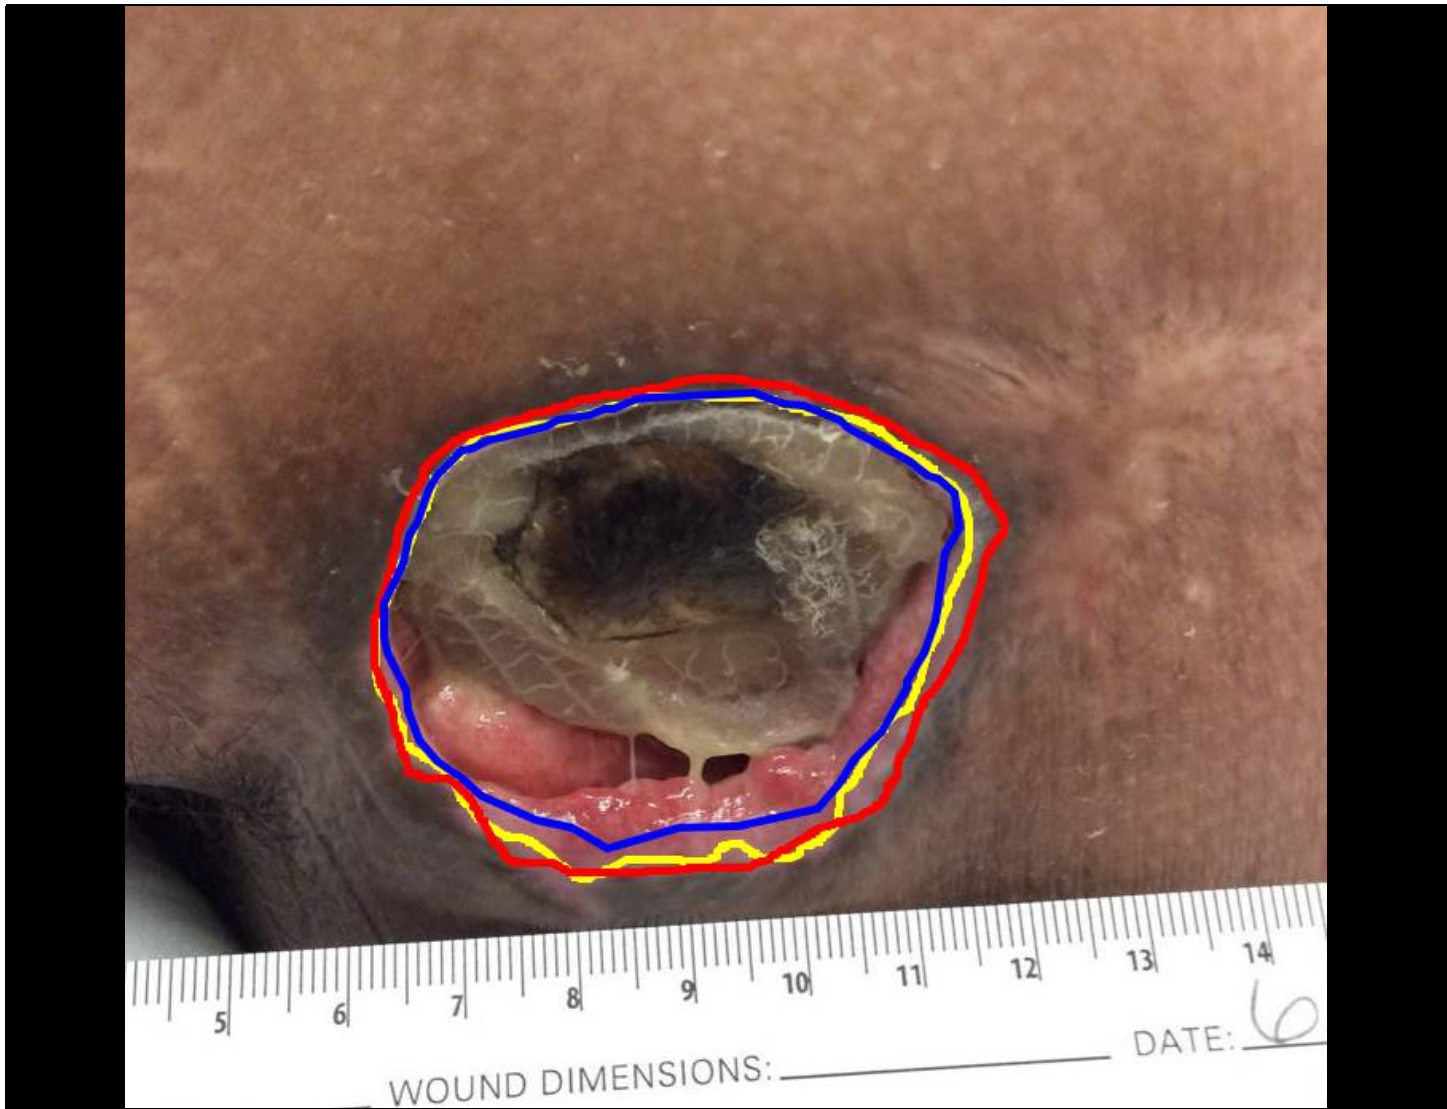

| Tracing Data |                               |                           |                               |
|--------------|-------------------------------|---------------------------|-------------------------------|
| Tracer:      | Wound Area (px <sup>2</sup> ) | Ruler Calibration (px/cm) | Wound Area (cm <sup>2</sup> ) |
| H1           | 85057                         | 70.9                      | 16.94                         |
| H2           | 93852                         | 71.7                      | 18.23                         |
| AI           | 78094                         | 73.4                      | 14.50                         |

| Tracing Comparisons     |                     |                     |                     |                     |
|-------------------------|---------------------|---------------------|---------------------|---------------------|
| Difference Metric:      | Human-Human         |                     | Human-AI            |                     |
|                         | H1(ref)<br>H2(test) | H2(ref)<br>H1(test) | H1(ref)<br>AI(test) | H2(ref)<br>AI(test) |
| False Negative Area (%) | 0.4                 | 9.8                 | 8.4                 | 16.8                |
| False Positive Area (%) | 10.8                | 0.4                 | 0.2                 | 0.0                 |
| Relative Error (%)      | 10.3                | 9.4                 | 8.2                 | 16.8                |

| Blinded Attending Surgeon Review |              |                      |                      |                      |              |                         |
|----------------------------------|--------------|----------------------|----------------------|----------------------|--------------|-------------------------|
| Reviewer                         | PGT Estimate | H1 meets definition? | H2 meets definition? | AI meets definition? | Which is AI? | Which is most accurate? |
| 1                                | 10           | Yes                  | Yes                  | Yes                  | H1           | H1                      |
| 2                                | 100          | Yes                  | Yes                  | Yes                  | H2           | AI                      |
| 3                                | 20           | Yes                  | Yes                  | Yes                  | H1           | AI                      |

| Wound EMR Information |        |     |            |                |                   |                  |                  |                               |
|-----------------------|--------|-----|------------|----------------|-------------------|------------------|------------------|-------------------------------|
| Sequential Number     | Gender | Age | Wound Type | Wound Location | Wound Length (cm) | Wound Width (cm) | Wound Depth (cm) | Wound Area (cm <sup>2</sup> ) |
| 44                    | M      | 60  | Abscess    | Back           |                   |                  |                  |                               |

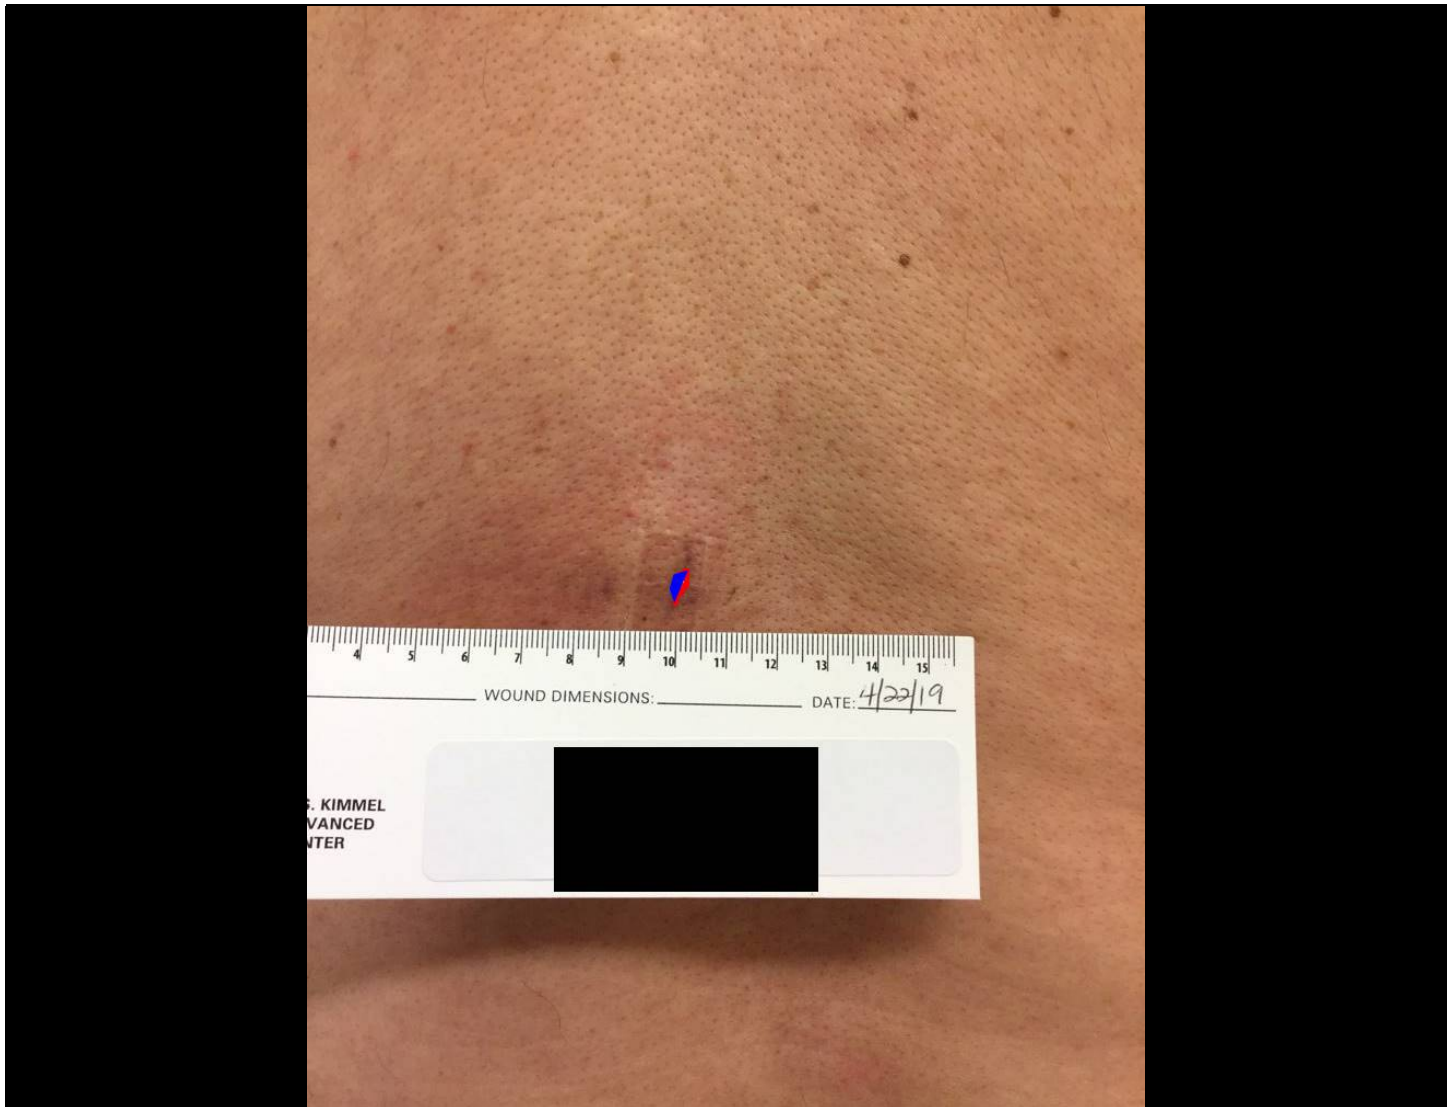

| Tracing Data |                               |                           |                               |
|--------------|-------------------------------|---------------------------|-------------------------------|
| Tracer:      | Wound Area (px <sup>2</sup> ) | Ruler Calibration (px/cm) | Wound Area (cm <sup>2</sup> ) |
| H1           | 31                            | 47.1                      | 0.01                          |
| H2           | 124                           | 50.3                      | 0.05                          |
| AI           | 70                            | 49.6                      | 0.00                          |

| Tracing Comparisons     |                     |                     |                     |                     |
|-------------------------|---------------------|---------------------|---------------------|---------------------|
| Difference Metric:      | Human-Human         |                     | Human-AI            |                     |
|                         | H1(ref)<br>H2(test) | H2(ref)<br>H1(test) | H1(ref)<br>AI(test) | H2(ref)<br>AI(test) |
| False Negative Area (%) | 0.0                 | 75.0                | 93.5                | 80.6                |
| False Positive Area (%) | 300.0               | 0.0                 | 219.4               | 37.1                |
| Relative Error (%)      | 300.0               | 75.0                | 125.8               | 43.5                |

| Blinded Attending Surgeon Review |              |                      |                      |                      |              |                         |
|----------------------------------|--------------|----------------------|----------------------|----------------------|--------------|-------------------------|
| Reviewer                         | PGT Estimate | H1 meets definition? | H2 meets definition? | AI meets definition? | Which is AI? | Which is most accurate? |
| 1                                | 100          | No                   | No                   | No                   | H2           | H1                      |
| 2                                | 0            |                      |                      |                      |              |                         |
| 3                                | 0            | No                   | No                   | No                   | H1           | H2                      |

| Wound EMR Information |        |     |            |                |                   |                  |                  |                               |
|-----------------------|--------|-----|------------|----------------|-------------------|------------------|------------------|-------------------------------|
| Sequential Number     | Gender | Age | Wound Type | Wound Location | Wound Length (cm) | Wound Width (cm) | Wound Depth (cm) | Wound Area (cm <sup>2</sup> ) |
| 45                    | M      | 34  | Kaposi/HIV | Thigh -Medial  | 5.0               |                  |                  |                               |

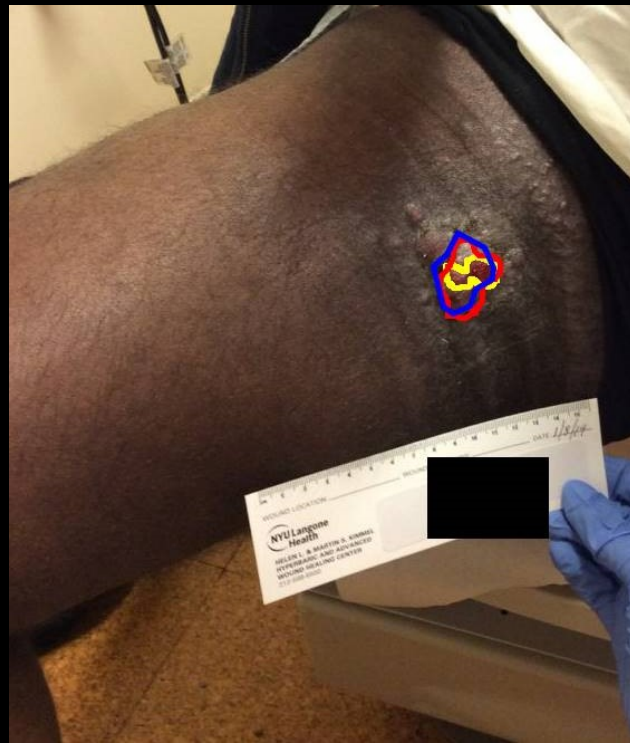

| Tracing Data |                               |                           |                               |
|--------------|-------------------------------|---------------------------|-------------------------------|
| Tracer:      | Wound Area (px <sup>2</sup> ) | Ruler Calibration (px/cm) | Wound Area (cm <sup>2</sup> ) |
| H1           | 893                           | 19.2                      | 2.41                          |
| H2           | 2299                          | 21.2                      | 5.10                          |
| AI           | 2353                          | 22.6                      | 4.60                          |

| Tracing Comparisons     |                     |                     |                     |                     |
|-------------------------|---------------------|---------------------|---------------------|---------------------|
| Difference Metric:      | Human-Human         |                     | Human-AI            |                     |
|                         | H1(ref)<br>H2(test) | H2(ref)<br>H1(test) | H1(ref)<br>AI(test) | H2(ref)<br>AI(test) |
| False Negative Area (%) | 5.8                 | 63.4                | 8.3                 | 16.6                |
| False Positive Area (%) | 163.3               | 2.3                 | 171.8               | 19.0                |
| Relative Error (%)      | 157.4               | 61.2                | 163.5               | 2.3                 |

| Blinded Attending Surgeon Review |              |                      |                      |                      |              |                         |
|----------------------------------|--------------|----------------------|----------------------|----------------------|--------------|-------------------------|
| Reviewer                         | PGT Estimate | H1 meets definition? | H2 meets definition? | AI meets definition? | Which is AI? | Which is most accurate? |
| 1                                | 100          | Yes                  | No                   | No                   | H1           | H2                      |
| 2                                | 100          | Yes                  | No                   | No                   | H1           | H2                      |
| 3                                | 100          | Yes                  | No                   | No                   | AI           | H1                      |



| Wound EMR Information |        |     |            |                |                   |                  |                  |                               |
|-----------------------|--------|-----|------------|----------------|-------------------|------------------|------------------|-------------------------------|
| Sequential Number     | Gender | Age | Wound Type | Wound Location | Wound Length (cm) | Wound Width (cm) | Wound Depth (cm) | Wound Area (cm <sup>2</sup> ) |
| 46                    | F      | 68  | Surgical   | Ankle          | 4.0               |                  |                  |                               |

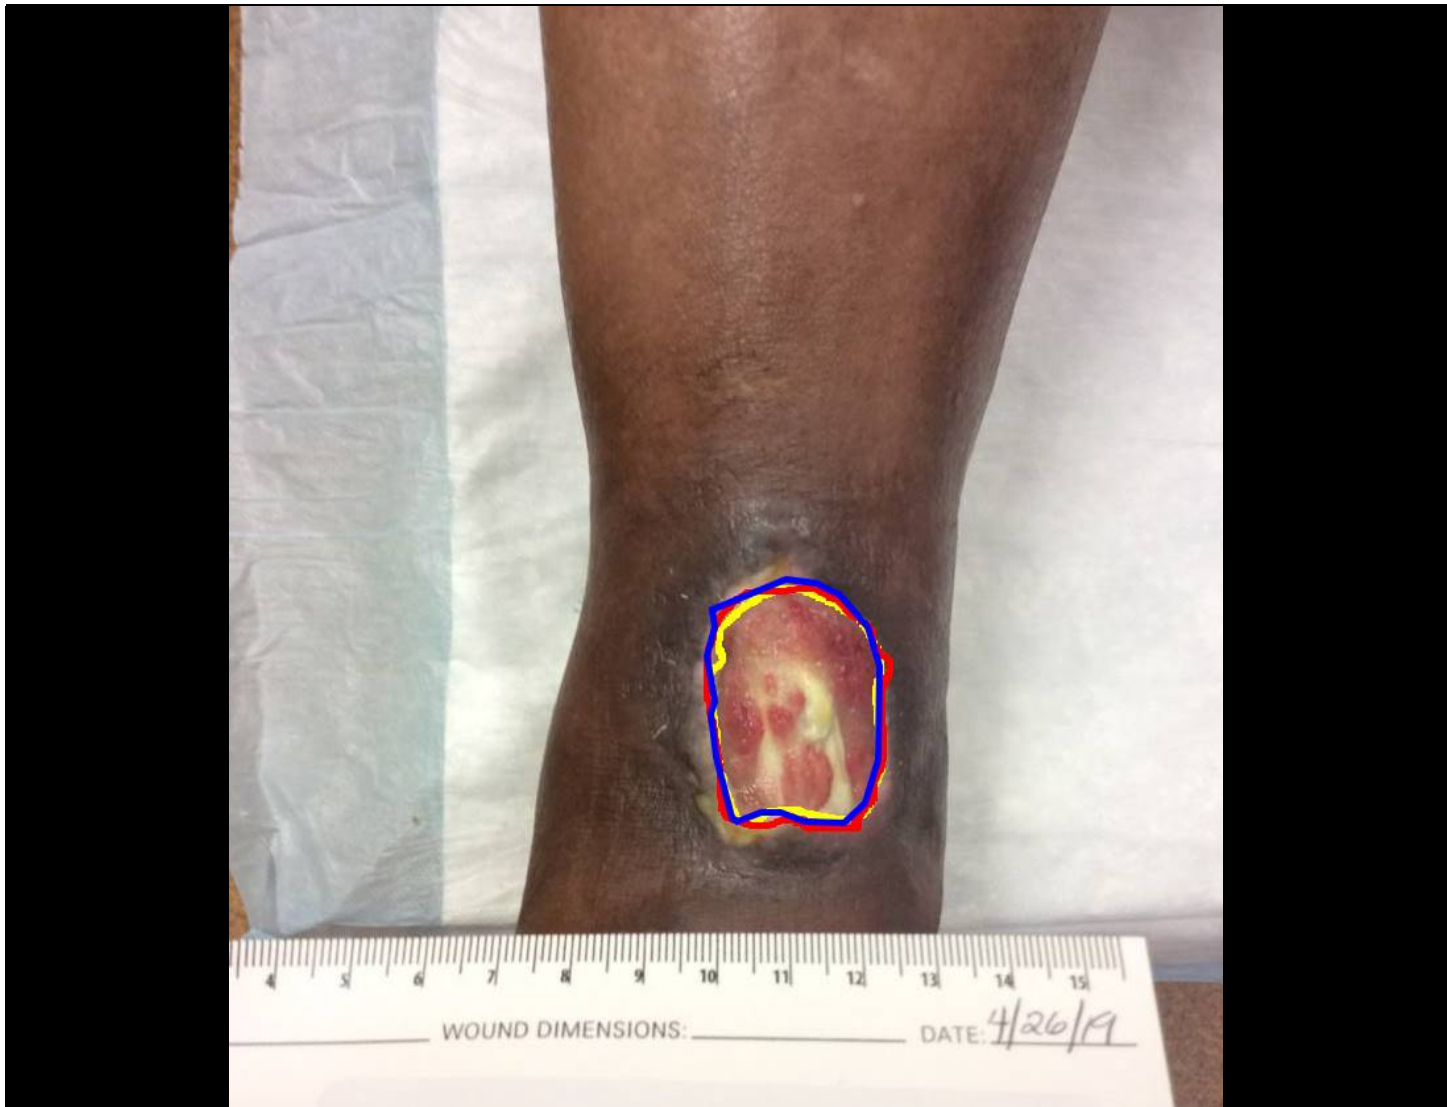

| Tracing Data |                               |                           |                               |
|--------------|-------------------------------|---------------------------|-------------------------------|
| Tracer:      | Wound Area (px <sup>2</sup> ) | Ruler Calibration (px/cm) | Wound Area (cm <sup>2</sup> ) |
| H1           | 19184                         | 55.0                      | 6.34                          |
| H2           | 21177                         | 66.4                      | 4.80                          |
| AI           | 20394                         | 58.3                      | 6.00                          |

| Tracing Comparisons     |                     |                     |                     |                     |
|-------------------------|---------------------|---------------------|---------------------|---------------------|
| Difference Metric:      | Human-Human         |                     | Human-AI            |                     |
|                         | H1(ref)<br>H2(test) | H2(ref)<br>H1(test) | H1(ref)<br>AI(test) | H2(ref)<br>AI(test) |
| False Negative Area (%) | 0.3                 | 9.7                 | 1.6                 | 5.9                 |
| False Positive Area (%) | 10.7                | 0.3                 | 7.9                 | 2.2                 |
| Relative Error (%)      | 10.4                | 9.4                 | 6.3                 | 3.7                 |

| Blinded Attending Surgeon Review |              |                      |                      |                      |              |                         |
|----------------------------------|--------------|----------------------|----------------------|----------------------|--------------|-------------------------|
| Reviewer                         | PGT Estimate | H1 meets definition? | H2 meets definition? | AI meets definition? | Which is AI? | Which is most accurate? |
| 1                                | 80           | Yes                  | Yes                  | Yes                  | H1           | H1                      |
| 2                                | 70           | Yes                  | Yes                  | Yes                  | H2           | H1                      |
| 3                                | 75           | Yes                  | Yes                  | Yes                  | H1           | H2                      |

| Wound EMR Information |        |     |            |                |                   |                  |                  |                               |
|-----------------------|--------|-----|------------|----------------|-------------------|------------------|------------------|-------------------------------|
| Sequential Number     | Gender | Age | Wound Type | Wound Location | Wound Length (cm) | Wound Width (cm) | Wound Depth (cm) | Wound Area (cm <sup>2</sup> ) |
| 47                    | M      | 44  | Trauma     | Leg-Knee       |                   |                  |                  |                               |

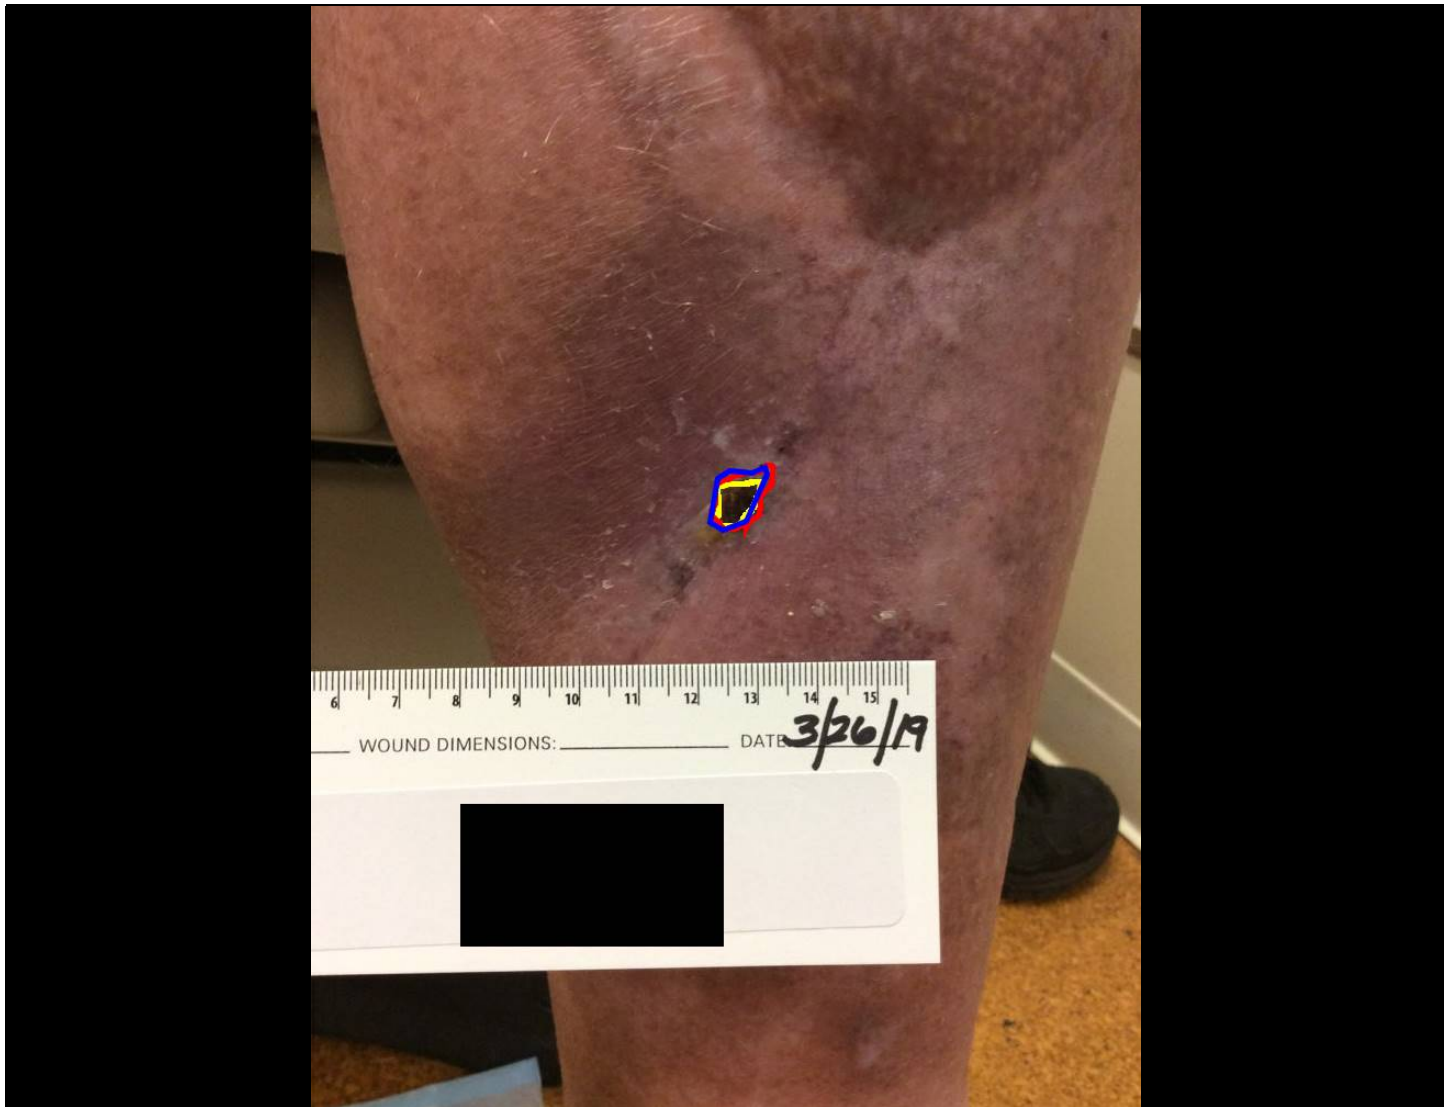

| Tracing Data |                               |                           |                               |
|--------------|-------------------------------|---------------------------|-------------------------------|
| Tracer:      | Wound Area (px <sup>2</sup> ) | Ruler Calibration (px/cm) | Wound Area (cm <sup>2</sup> ) |
| H1           | 1189                          | 53.9                      | 0.41                          |
| H2           | 2060                          | 59.2                      | 0.59                          |
| AI           | 1876                          | 55.9                      | 0.60                          |

| Tracing Comparisons     |                     |                     |                     |                     |
|-------------------------|---------------------|---------------------|---------------------|---------------------|
| Difference Metric:      | Human-Human         |                     | Human-AI            |                     |
|                         | H1(ref)<br>H2(test) | H2(ref)<br>H1(test) | H1(ref)<br>AI(test) | H2(ref)<br>AI(test) |
| False Negative Area (%) | 0.3                 | 42.5                | 0.0                 | 17.0                |
| False Positive Area (%) | 73.6                | 0.2                 | 57.8                | 8.1                 |
| Relative Error (%)      | 73.3                | 42.3                | 57.8                | 8.9                 |

| Blinded Attending Surgeon Review |              |                      |                      |                      |              |                         |
|----------------------------------|--------------|----------------------|----------------------|----------------------|--------------|-------------------------|
| Reviewer                         | PGT Estimate | H1 meets definition? | H2 meets definition? | AI meets definition? | Which is AI? | Which is most accurate? |
| 1                                | 100          | Yes                  | Yes                  | Yes                  | H2           | H2                      |
| 2                                | 0            |                      |                      |                      |              |                         |
| 3                                | 0            | No                   | Yes                  | Yes                  | AI           | AI                      |

| Wound EMR Information |        |     |            |                |                   |                  |                  |                               |
|-----------------------|--------|-----|------------|----------------|-------------------|------------------|------------------|-------------------------------|
| Sequential Number     | Gender | Age | Wound Type | Wound Location | Wound Length (cm) | Wound Width (cm) | Wound Depth (cm) | Wound Area (cm <sup>2</sup> ) |
| 49                    | M      | 59  | Radiation  | Back           | 1.0               |                  |                  |                               |

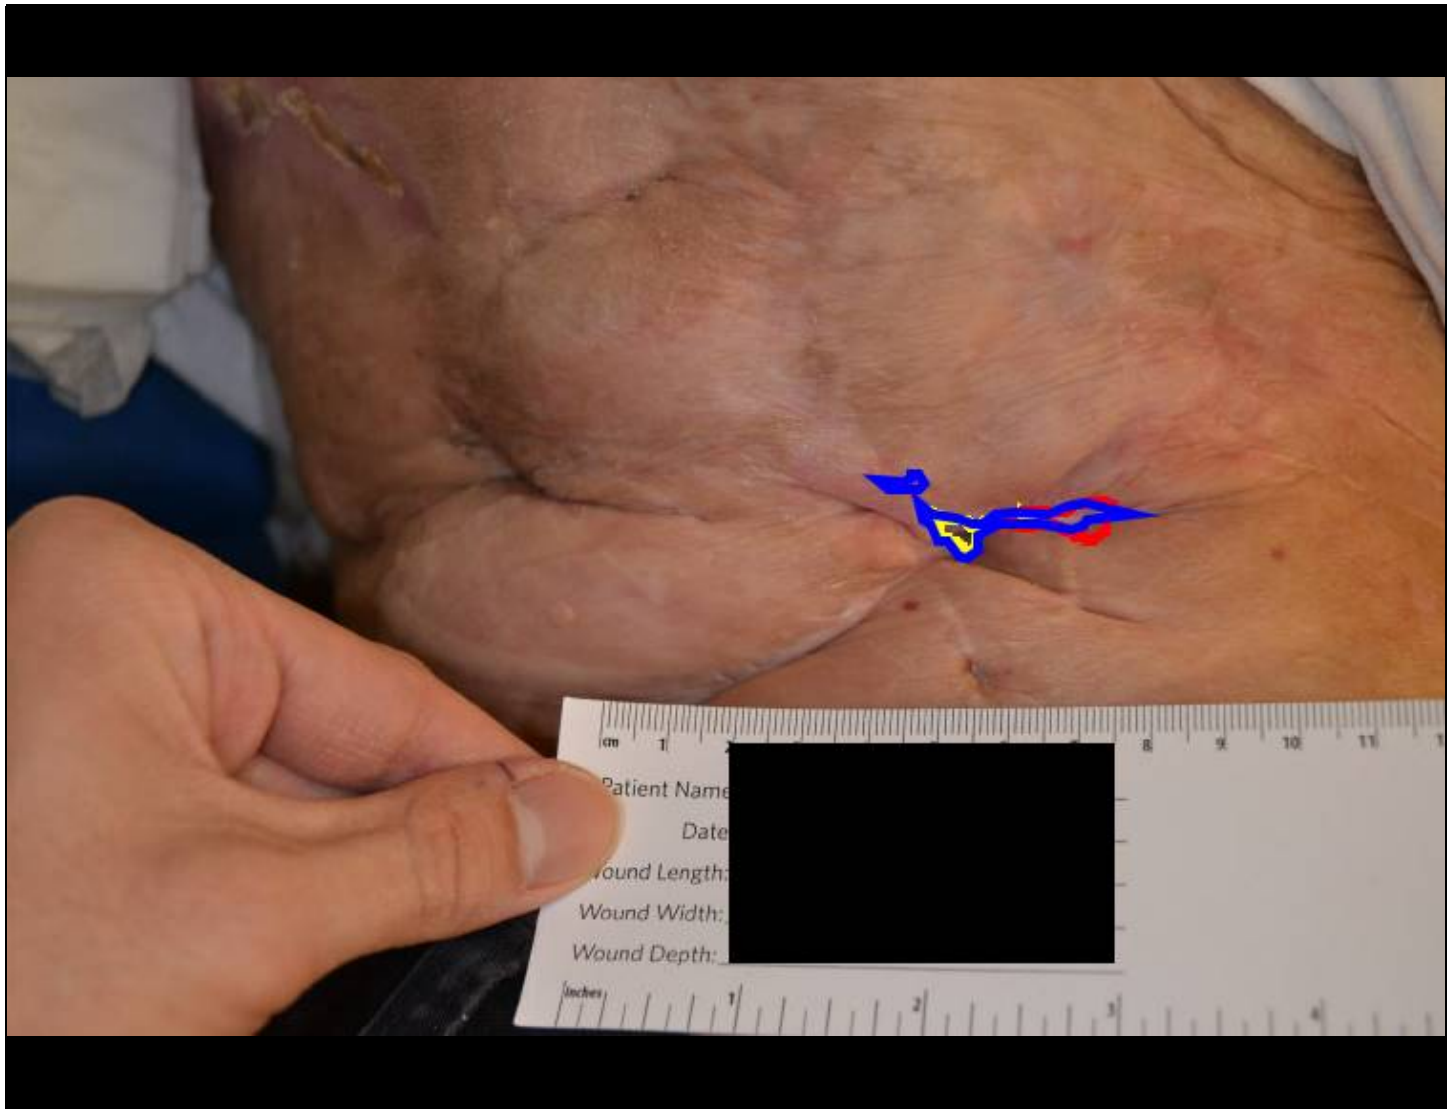

| Tracing Data |                               |                           |                               |
|--------------|-------------------------------|---------------------------|-------------------------------|
| Tracer:      | Wound Area (px <sup>2</sup> ) | Ruler Calibration (px/cm) | Wound Area (cm <sup>2</sup> ) |
| H1           | 332                           | 34.9                      | 0.27                          |
| H2           | 626                           | 23.6                      | 1.13                          |
| AI           | 1034                          | 38.4                      | 0.70                          |

| Tracing Comparisons     |                     |                     |                     |                     |
|-------------------------|---------------------|---------------------|---------------------|---------------------|
| Difference Metric:      | Human-Human         |                     | Human-AI            |                     |
|                         | H1(ref)<br>H2(test) | H2(ref)<br>H1(test) | H1(ref)<br>AI(test) | H2(ref)<br>AI(test) |
| False Negative Area (%) | 87.0                | 93.1                | 1.2                 | 36.6                |
| False Positive Area (%) | 175.6               | 46.2                | 212.7               | 101.8               |
| Relative Error (%)      | 88.6                | 47.0                | 211.4               | 65.2                |

| Blinded Attending Surgeon Review |              |                      |                      |                      |              |                         |
|----------------------------------|--------------|----------------------|----------------------|----------------------|--------------|-------------------------|
| Reviewer                         | PGT Estimate | H1 meets definition? | H2 meets definition? | AI meets definition? | Which is AI? | Which is most accurate? |
| 1                                | 100          | No                   | No                   | Yes                  | H1           | H1                      |
| 2                                | 100          | No                   | Yes                  | Yes                  | H1           | H2                      |
| 3                                | 100          | Yes                  | No                   | No                   | AI           | H2                      |

| Wound EMR Information |        |     |            |                |                   |                  |                  |                               |
|-----------------------|--------|-----|------------|----------------|-------------------|------------------|------------------|-------------------------------|
| Sequential Number     | Gender | Age | Wound Type | Wound Location | Wound Length (cm) | Wound Width (cm) | Wound Depth (cm) | Wound Area (cm <sup>2</sup> ) |
| 51                    | F      | 65  | Venous     | Right anterior |                   |                  |                  |                               |

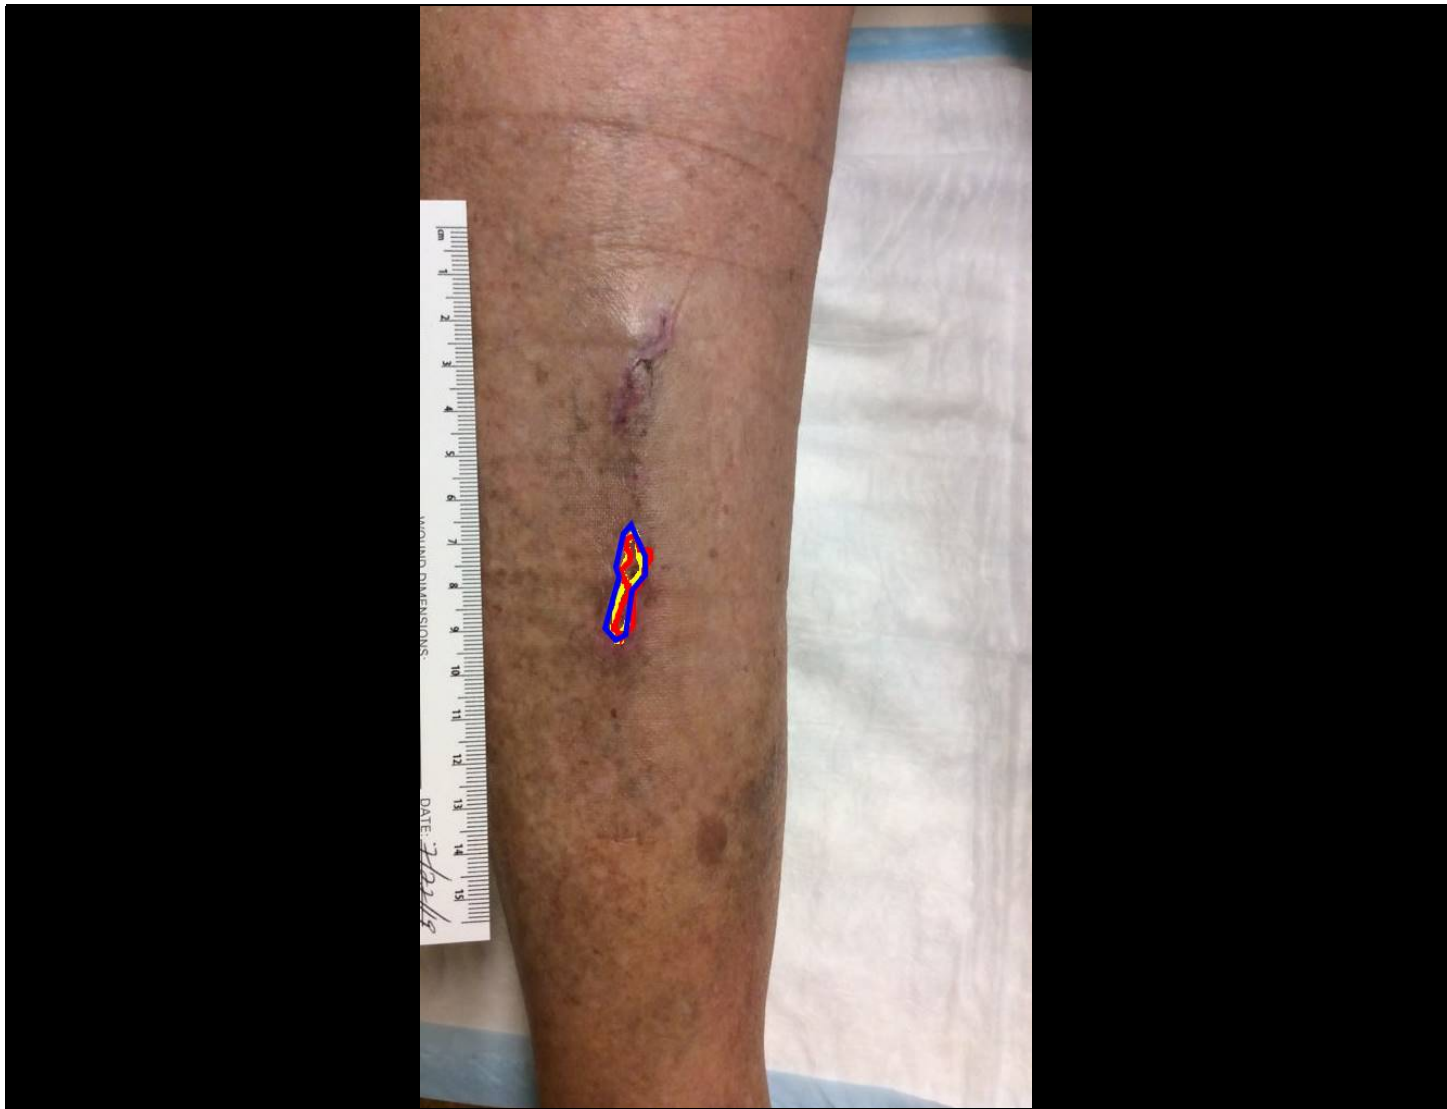

| Tracing Data |                               |                           |                               |
|--------------|-------------------------------|---------------------------|-------------------------------|
| Tracer:      | Wound Area (px <sup>2</sup> ) | Ruler Calibration (px/cm) | Wound Area (cm <sup>2</sup> ) |
| H1           | 1075                          | 40.2                      | 0.66                          |
| H2           | 1204                          | 39.5                      | 0.77                          |
| AI           | 1876                          | 41.3                      | 1.10                          |

| Tracing Comparisons     |                     |                     |                     |                     |
|-------------------------|---------------------|---------------------|---------------------|---------------------|
| Difference Metric:      | Human-Human         |                     | Human-AI            |                     |
|                         | H1(ref)<br>H2(test) | H2(ref)<br>H1(test) | H1(ref)<br>AI(test) | H2(ref)<br>AI(test) |
| False Negative Area (%) | 24.0                | 32.1                | 0.8                 | 15.0                |
| False Positive Area (%) | 36.0                | 21.4                | 75.3                | 70.8                |
| Relative Error (%)      | 12.0                | 10.7                | 74.5                | 55.8                |

| Blinded Attending Surgeon Review |              |                      |                      |                      |              |                         |
|----------------------------------|--------------|----------------------|----------------------|----------------------|--------------|-------------------------|
| Reviewer                         | PGT Estimate | H1 meets definition? | H2 meets definition? | AI meets definition? | Which is AI? | Which is most accurate? |
| 1                                | 90           | Yes                  | Yes                  | Yes                  | H2           | H1                      |
| 2                                | 100          | Yes                  | Yes                  | Yes                  | AI           | AI                      |
| 3                                | 30           | Yes                  | No                   | Yes                  | AI           | AI                      |

| Wound EMR Information |        |     |            |                |                   |                  |                  |                               |
|-----------------------|--------|-----|------------|----------------|-------------------|------------------|------------------|-------------------------------|
| Sequential Number     | Gender | Age | Wound Type | Wound Location | Wound Length (cm) | Wound Width (cm) | Wound Depth (cm) | Wound Area (cm <sup>2</sup> ) |
| 52                    | F      | 38  | Venous     | Ankle          |                   |                  |                  |                               |

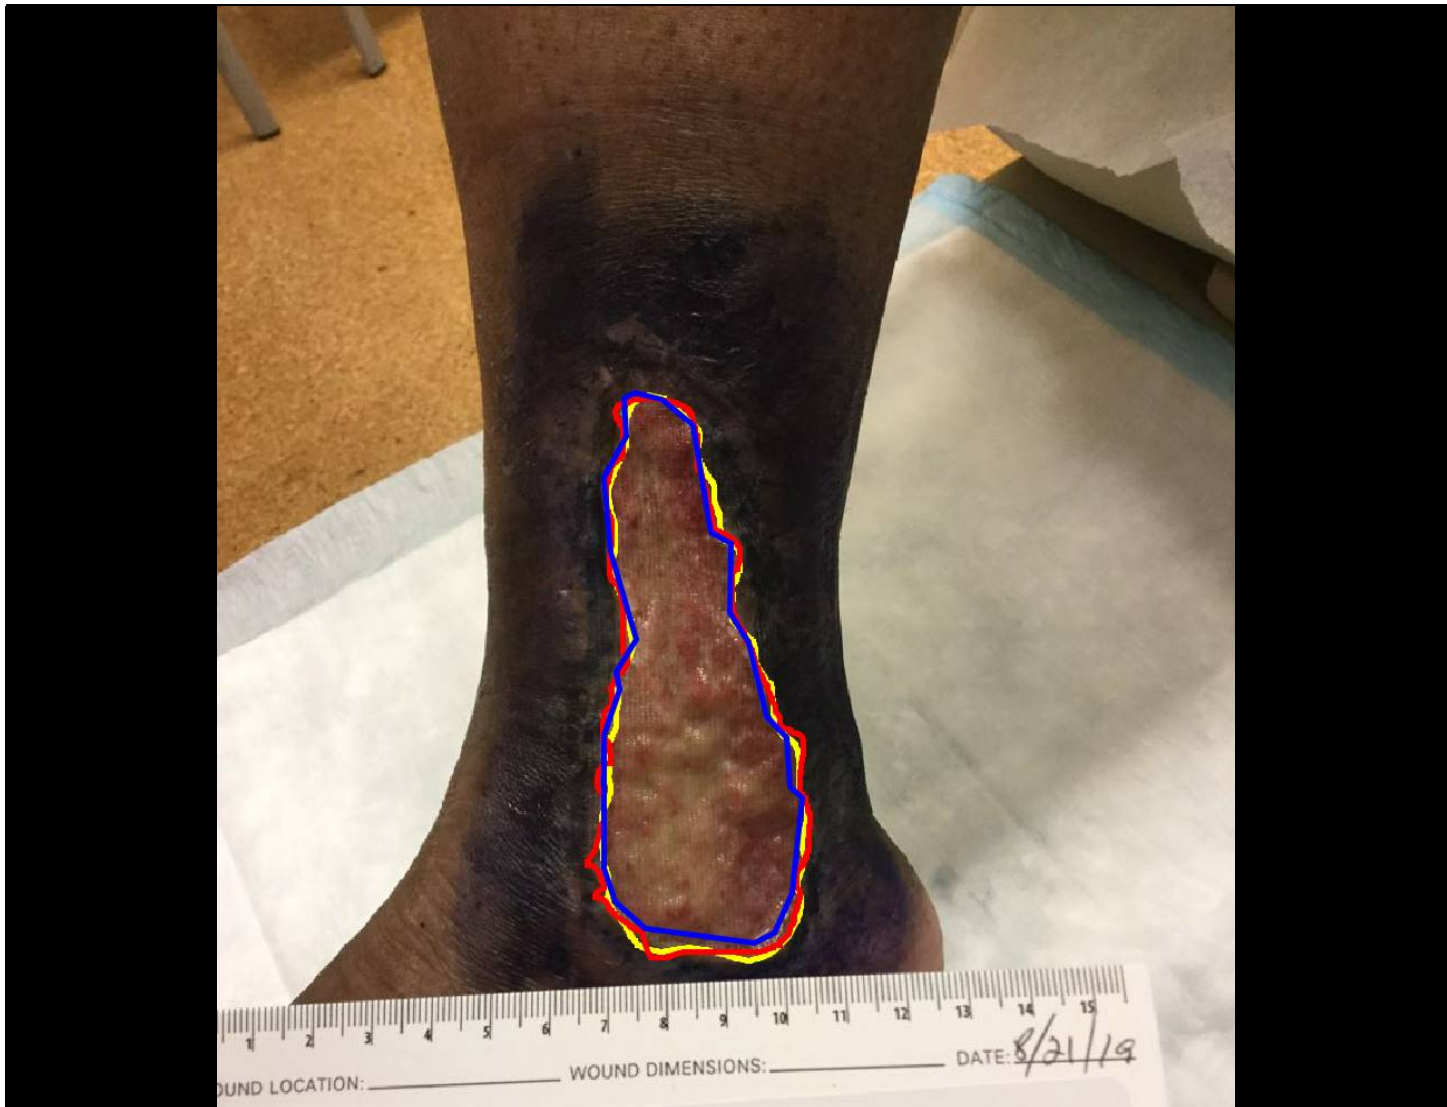

| Tracing Data |                               |                           |                               |
|--------------|-------------------------------|---------------------------|-------------------------------|
| Tracer:      | Wound Area (px <sup>2</sup> ) | Ruler Calibration (px/cm) | Wound Area (cm <sup>2</sup> ) |
| H1           | 63066                         | 53.2                      | 22.25                         |
| H2           | 64858                         | 54.1                      | 22.19                         |
| AI           | 58935                         | 54.4                      | 19.90                         |

| Tracing Comparisons     |                     |                     |                     |                     |
|-------------------------|---------------------|---------------------|---------------------|---------------------|
| Difference Metric:      | Human-Human         |                     | Human-AI            |                     |
|                         | H1(ref)<br>H2(test) | H2(ref)<br>H1(test) | H1(ref)<br>AI(test) | H2(ref)<br>AI(test) |
| False Negative Area (%) | 2.1                 | 4.8                 | 8.3                 | 9.9                 |
| False Positive Area (%) | 5.0                 | 2.1                 | 1.8                 | 0.7                 |
| Relative Error (%)      | 2.8                 | 2.8                 | 6.6                 | 9.1                 |

| Blinded Attending Surgeon Review |              |                      |                      |                      |              |                         |
|----------------------------------|--------------|----------------------|----------------------|----------------------|--------------|-------------------------|
| Reviewer                         | PGT Estimate | H1 meets definition? | H2 meets definition? | AI meets definition? | Which is AI? | Which is most accurate? |
| 1                                | 40           | Yes                  | Yes                  | Yes                  | H2           | AI                      |
| 2                                | 100          | Yes                  | Yes                  | Yes                  | AI           | H2                      |
| 3                                | 50           | Yes                  | Yes                  | Yes                  | H1           | H2                      |

**Wound EMR Information**

| Sequential Number | Gender | Age | Wound Type | Wound Location | Wound Length (cm) | Wound Width (cm) | Wound Depth (cm) | Wound Area (cm <sup>2</sup> ) |
|-------------------|--------|-----|------------|----------------|-------------------|------------------|------------------|-------------------------------|
| 53                | F      | 51  | Surgical   | Breast         | 5.0               | 0.3              |                  | 1.50                          |

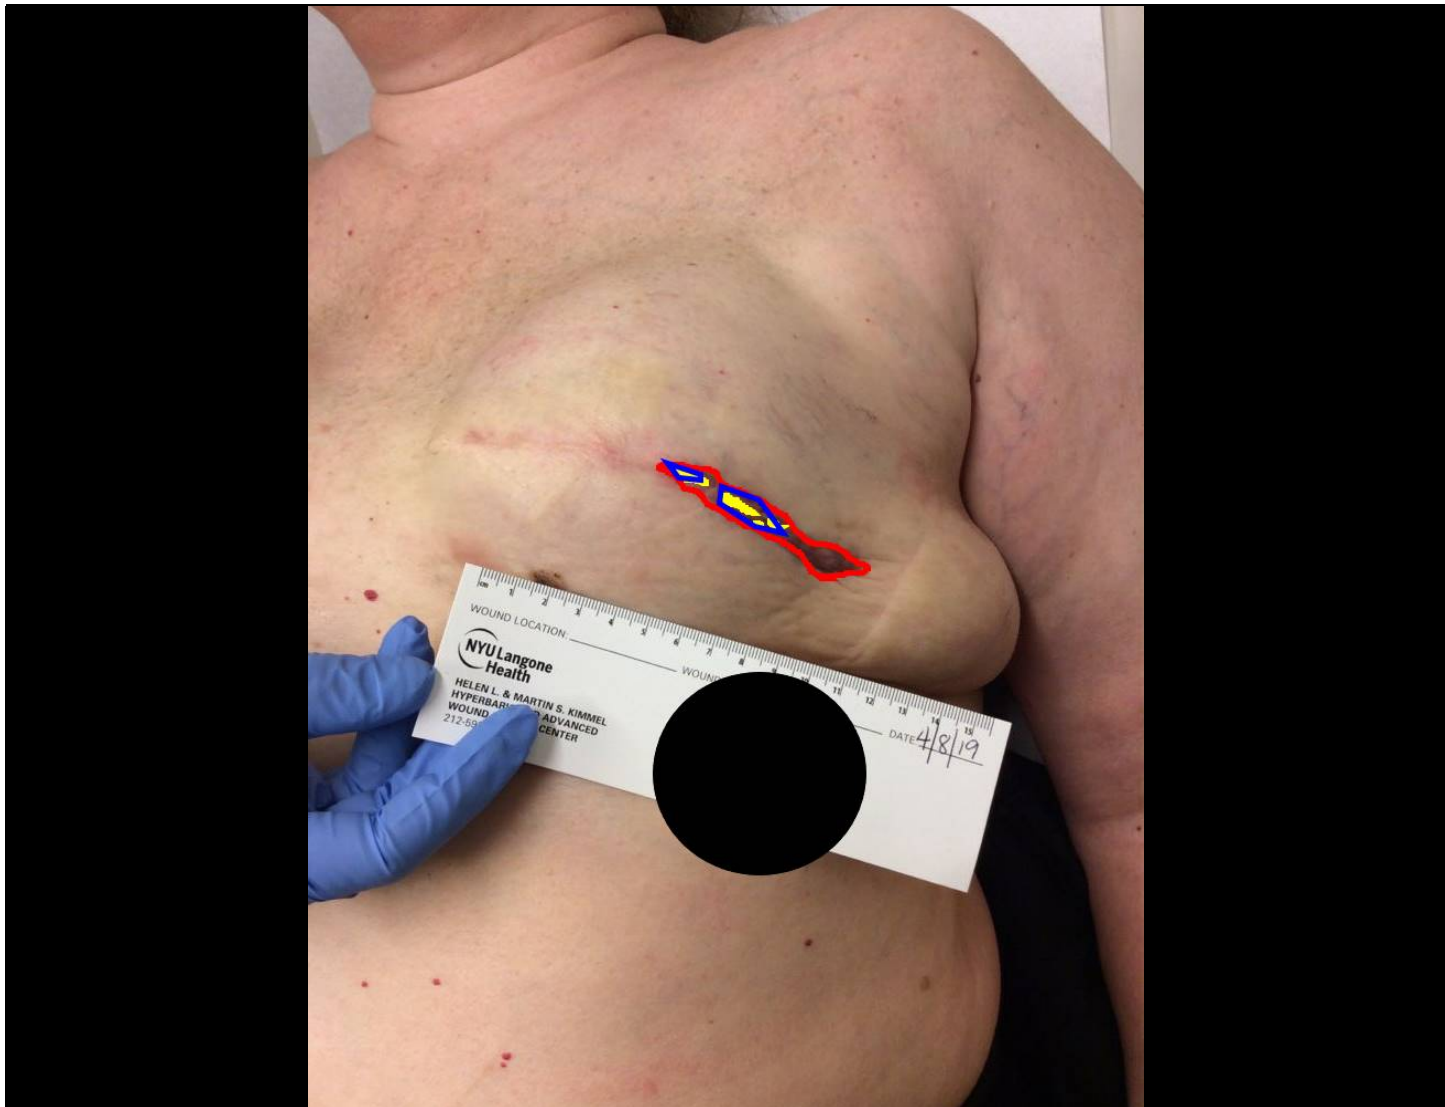

| Tracing Data |                               |                           |                               |
|--------------|-------------------------------|---------------------------|-------------------------------|
| Tracer:      | Wound Area (px <sup>2</sup> ) | Ruler Calibration (px/cm) | Wound Area (cm <sup>2</sup> ) |
| H1           | 233                           | 30.9                      | 0.24                          |
| H2           | 4160                          | 31.2                      | 4.26                          |
| AI           | 1185                          | 30.2                      | 1.30                          |

| Tracing Comparisons     |                     |                     |                     |                     |
|-------------------------|---------------------|---------------------|---------------------|---------------------|
| Difference Metric:      | Human-Human         |                     | Human-AI            |                     |
|                         | H1(ref)<br>H2(test) | H2(ref)<br>H1(test) | H1(ref)<br>AI(test) | H2(ref)<br>AI(test) |
| False Negative Area (%) | 0.0                 | 94.4                | 10.3                | 71.5                |
| False Positive Area (%) | 1685.4              | 0.0                 | 418.9               | 0.0                 |
| Relative Error (%)      | 1685.4              | 94.4                | 408.6               | 71.5                |

| Blinded Attending Surgeon Review |              |                      |                      |                      |              |                         |
|----------------------------------|--------------|----------------------|----------------------|----------------------|--------------|-------------------------|
| Reviewer                         | PGT Estimate | H1 meets definition? | H2 meets definition? | AI meets definition? | Which is AI? | Which is most accurate? |
| 1                                | 100          | No                   | Yes                  | No                   | H2           | H1                      |
| 2                                | 100          | No                   | Yes                  | No                   | H2           | H1                      |
| 3                                | 100          | Yes                  | No                   | No                   | H2           | H2                      |

**Wound EMR Information**

| Sequential Number | Gender | Age | Wound Type | Wound Location | Wound Length (cm) | Wound Width (cm) | Wound Depth (cm) | Wound Area (cm <sup>2</sup> ) |
|-------------------|--------|-----|------------|----------------|-------------------|------------------|------------------|-------------------------------|
| 54                | F      | 43  | Abscess    | Breast         | 3.0               |                  |                  | 0.00                          |

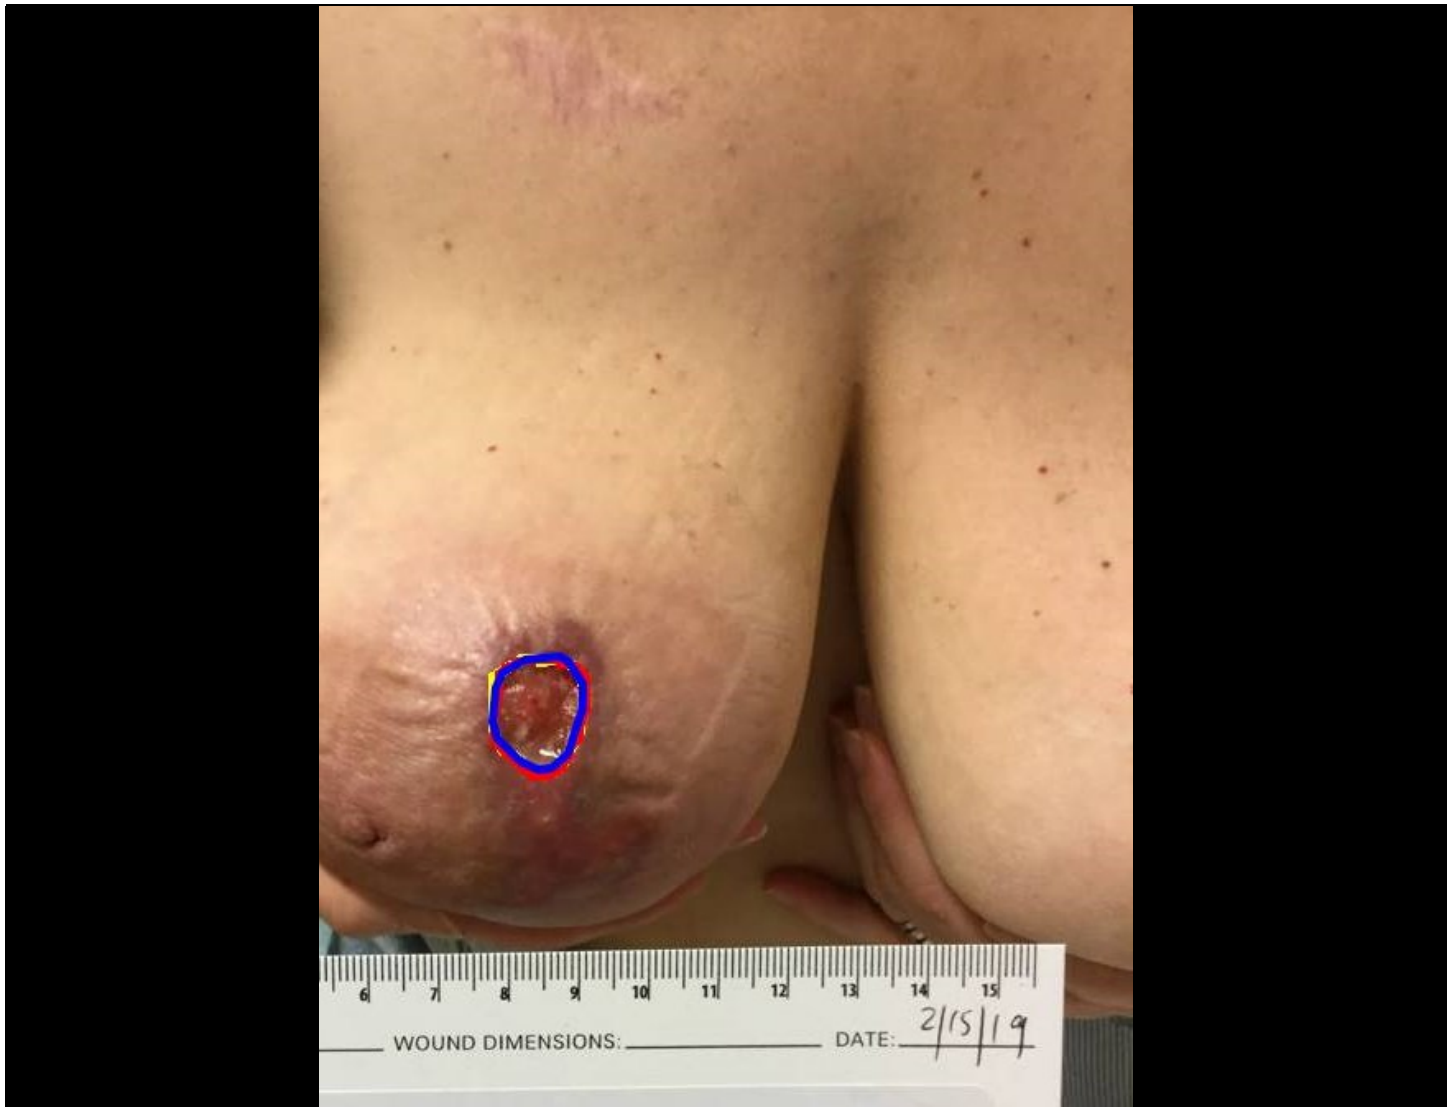

| Tracing Data |                               |                           |                               |
|--------------|-------------------------------|---------------------------|-------------------------------|
| Tracer:      | Wound Area (px <sup>2</sup> ) | Ruler Calibration (px/cm) | Wound Area (cm <sup>2</sup> ) |
| H1           | 3116                          | 42.7                      | 1.71                          |
| H2           | 3174                          | 44.7                      | 1.59                          |
| AI           | 2926                          | 42.8                      | 1.60                          |

| Tracing Comparisons     |                     |                     |                     |                     |
|-------------------------|---------------------|---------------------|---------------------|---------------------|
| Difference Metric:      | Human-Human         |                     | Human-AI            |                     |
|                         | H1(ref)<br>H2(test) | H2(ref)<br>H1(test) | H1(ref)<br>AI(test) | H2(ref)<br>AI(test) |
| False Negative Area (%) | 3.5                 | 5.2                 | 7.3                 | 9.6                 |
| False Positive Area (%) | 5.3                 | 3.4                 | 1.2                 | 1.8                 |
| Relative Error (%)      | 1.9                 | 1.8                 | 6.1                 | 7.8                 |

| Blinded Attending Surgeon Review |              |                      |                      |                      |              |                         |
|----------------------------------|--------------|----------------------|----------------------|----------------------|--------------|-------------------------|
| Reviewer                         | PGT Estimate | H1 meets definition? | H2 meets definition? | AI meets definition? | Which is AI? | Which is most accurate? |
| 1                                | 80           | No                   | No                   | No                   | H1           | H1                      |
| 2                                | 100          | Yes                  | Yes                  | Yes                  | H2           | AI                      |
| 3                                | 80           | Yes                  | Yes                  | Yes                  | AI           | H1                      |

| Wound EMR Information |        |     |            |                |                   |                  |                  |                               |
|-----------------------|--------|-----|------------|----------------|-------------------|------------------|------------------|-------------------------------|
| Sequential Number     | Gender | Age | Wound Type | Wound Location | Wound Length (cm) | Wound Width (cm) | Wound Depth (cm) | Wound Area (cm <sup>2</sup> ) |
| 55                    | F      | 85  | Trauma     | Ankle          |                   |                  |                  | 0.00                          |

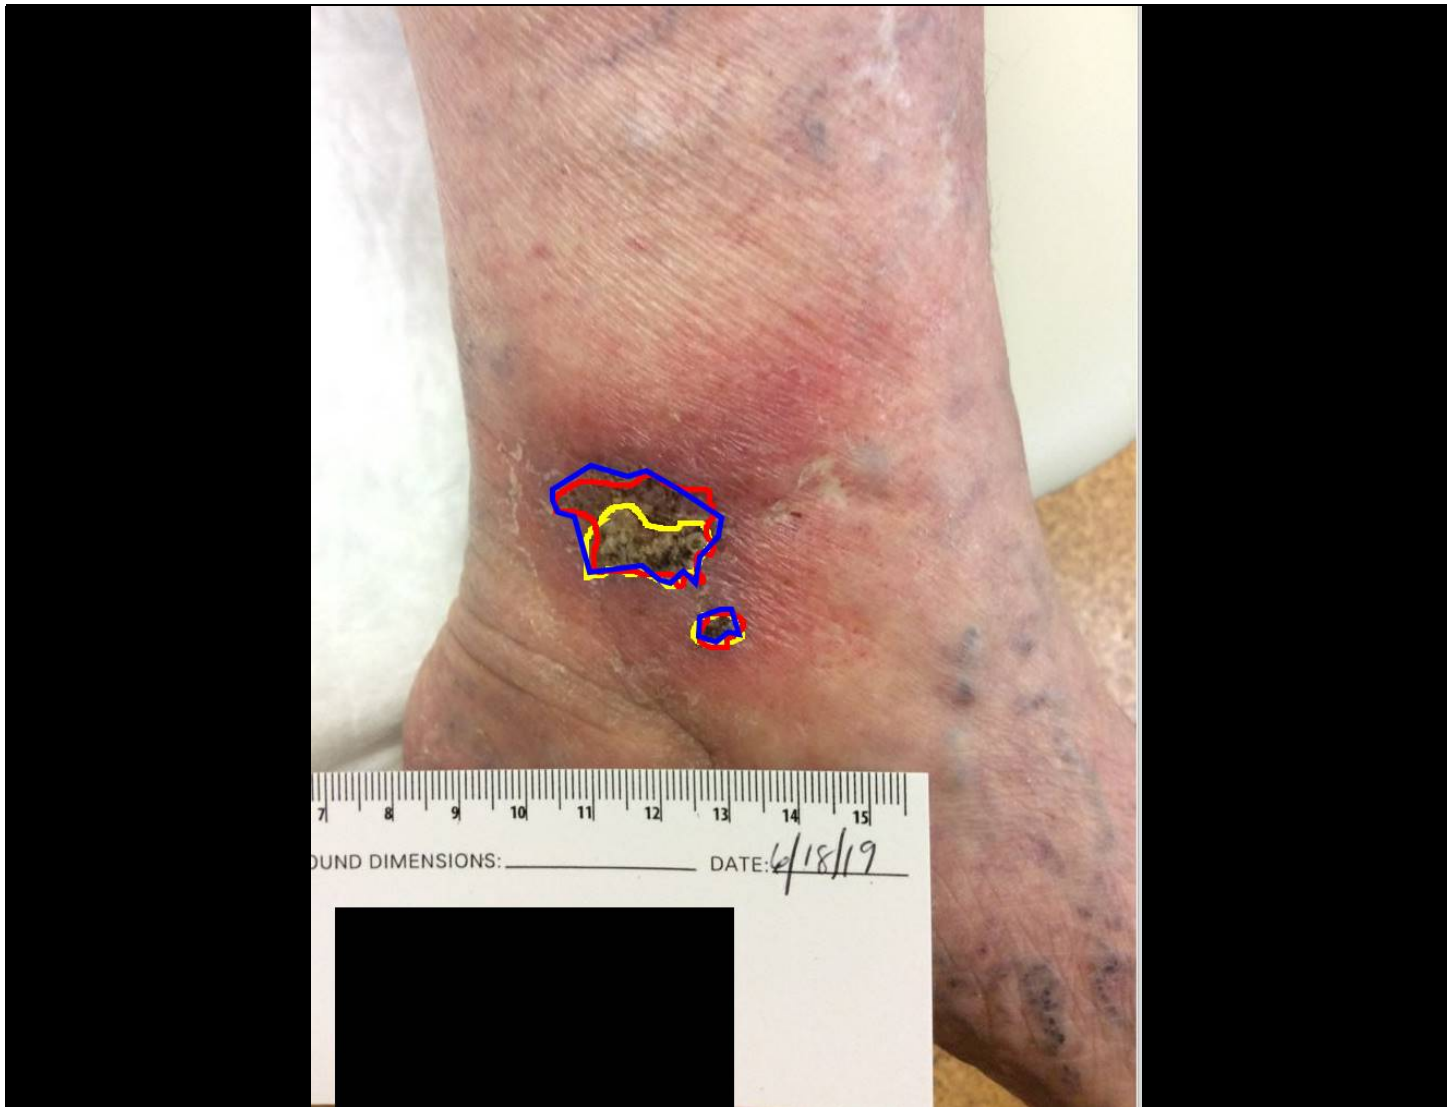

| Tracing Data |                               |                           |                               |
|--------------|-------------------------------|---------------------------|-------------------------------|
| Tracer:      | Wound Area (px <sup>2</sup> ) | Ruler Calibration (px/cm) | Wound Area (cm <sup>2</sup> ) |
| H1           | 6447                          | 62.7                      | 1.64                          |
| H2           | 10379                         | 62.0                      | 2.70                          |
| AI           | 11566                         | 63.2                      | 2.90                          |

| Tracing Comparisons     |                     |                     |                     |                     |
|-------------------------|---------------------|---------------------|---------------------|---------------------|
| Difference Metric:      | Human-Human         |                     | Human-AI            |                     |
|                         | H1(ref)<br>H2(test) | H2(ref)<br>H1(test) | H1(ref)<br>AI(test) | H2(ref)<br>AI(test) |
| False Negative Area (%) | 12.9                | 45.9                | 8.9                 | 8.2                 |
| False Positive Area (%) | 73.9                | 8.0                 | 88.3                | 19.7                |
| Relative Error (%)      | 61.0                | 37.9                | 79.4                | 11.4                |

| Blinded Attending Surgeon Review |              |                      |                      |                      |              |                         |
|----------------------------------|--------------|----------------------|----------------------|----------------------|--------------|-------------------------|
| Reviewer                         | PGT Estimate | H1 meets definition? | H2 meets definition? | AI meets definition? | Which is AI? | Which is most accurate? |
| 1                                | 0            | Yes                  | Yes                  | Yes                  | H2           | AI                      |
| 2                                | 0            |                      |                      |                      |              |                         |
| 3                                | 0            | No                   | Yes                  | Yes                  | H2           | H1                      |



| Wound EMR Information |        |     |            |                   |                   |                  |                  |                               |
|-----------------------|--------|-----|------------|-------------------|-------------------|------------------|------------------|-------------------------------|
| Sequential Number     | Gender | Age | Wound Type | Wound Location    | Wound Length (cm) | Wound Width (cm) | Wound Depth (cm) | Wound Area (cm <sup>2</sup> ) |
| 56                    | F      | 73  | Diabetic   | Left lateral foot | 6.0               | 4.0              |                  | 24.00                         |

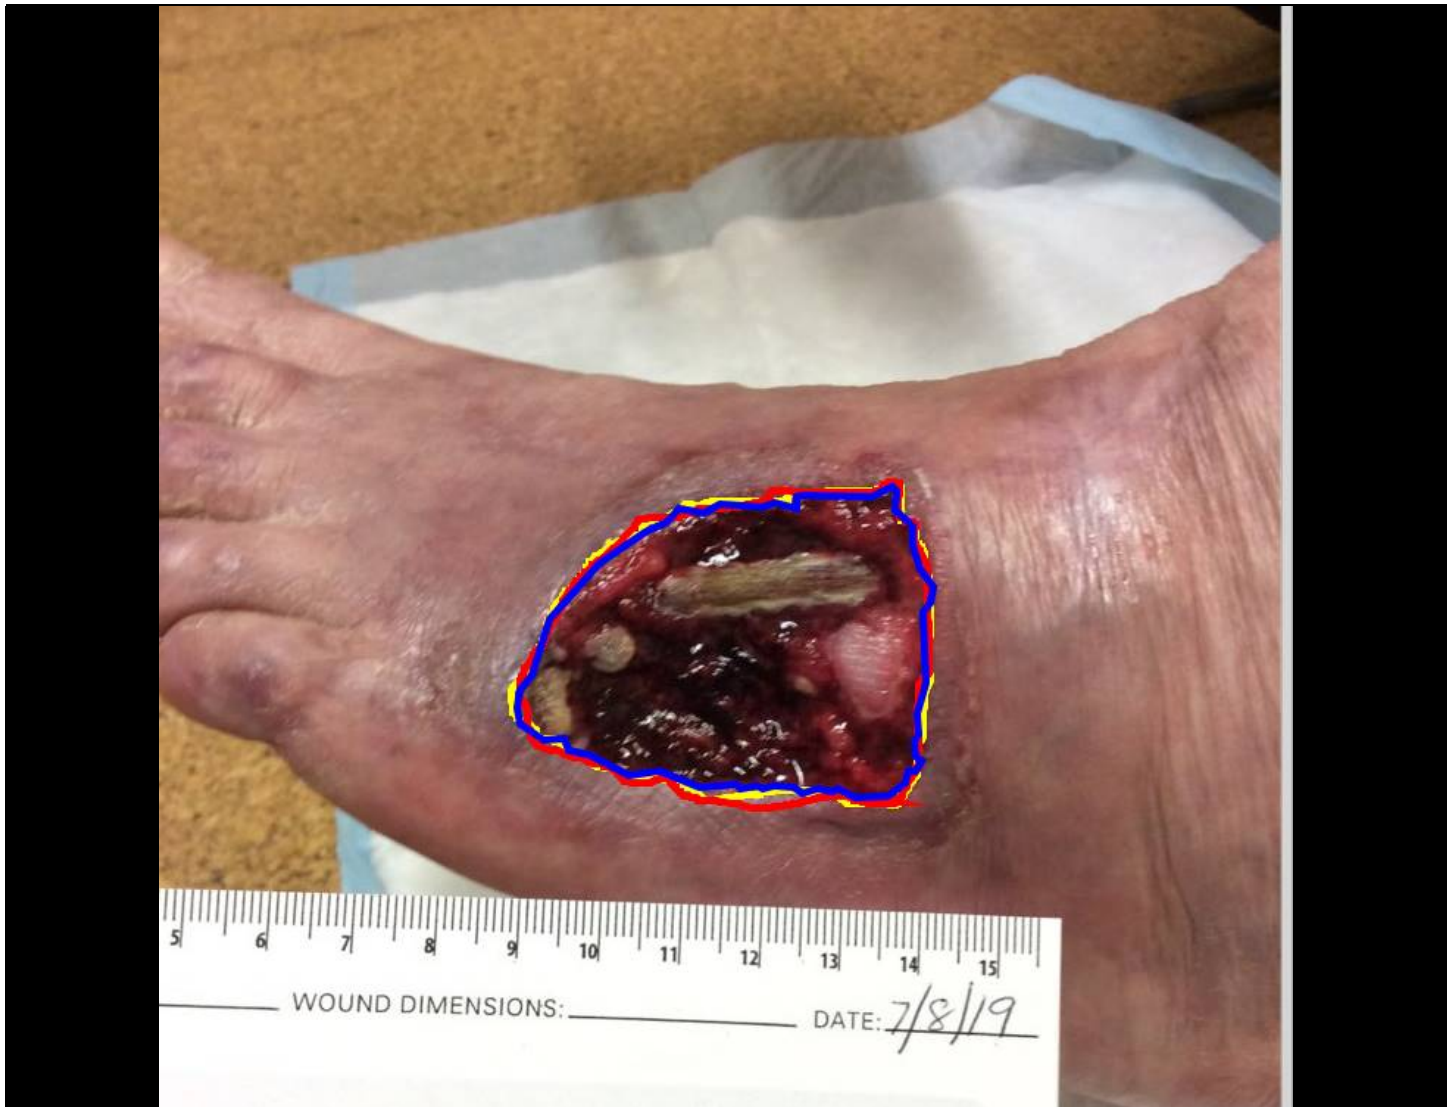

| Tracing Data |                               |                           |                               |
|--------------|-------------------------------|---------------------------|-------------------------------|
| Tracer:      | Wound Area (px <sup>2</sup> ) | Ruler Calibration (px/cm) | Wound Area (cm <sup>2</sup> ) |
| H1           | 47481                         | 54.7                      | 15.86                         |
| H2           | 47738                         | 54.6                      | 16.02                         |
| AI           | 45052                         | 54.8                      | 15.00                         |

| Tracing Comparisons     |                     |                     |                     |                     |
|-------------------------|---------------------|---------------------|---------------------|---------------------|
| Difference Metric:      | Human-Human         |                     | Human-AI            |                     |
|                         | H1(ref)<br>H2(test) | H2(ref)<br>H1(test) | H1(ref)<br>AI(test) | H2(ref)<br>AI(test) |
| False Negative Area (%) | 2.2                 | 2.7                 | 5.3                 | 6.3                 |
| False Positive Area (%) | 2.7                 | 2.2                 | 0.2                 | 0.7                 |
| Relative Error (%)      | 0.5                 | 0.5                 | 5.1                 | 5.6                 |

| Blinded Attending Surgeon Review |              |                      |                      |                      |              |                         |
|----------------------------------|--------------|----------------------|----------------------|----------------------|--------------|-------------------------|
| Reviewer                         | PGT Estimate | H1 meets definition? | H2 meets definition? | AI meets definition? | Which is AI? | Which is most accurate? |
| 1                                | 10           | Yes                  | Yes                  | Yes                  | H2           | AI                      |
| 2                                | 50           | Yes                  | Yes                  | Yes                  | H1           | AI                      |
| 3                                | 20           | Yes                  | Yes                  | Yes                  | AI           | H2                      |

| Wound EMR Information |        |     |            |                |                   |                  |                  |                               |
|-----------------------|--------|-----|------------|----------------|-------------------|------------------|------------------|-------------------------------|
| Sequential Number     | Gender | Age | Wound Type | Wound Location | Wound Length (cm) | Wound Width (cm) | Wound Depth (cm) | Wound Area (cm <sup>2</sup> ) |
| 57                    | F      | 50  | Venous     | Right medial   |                   |                  |                  |                               |

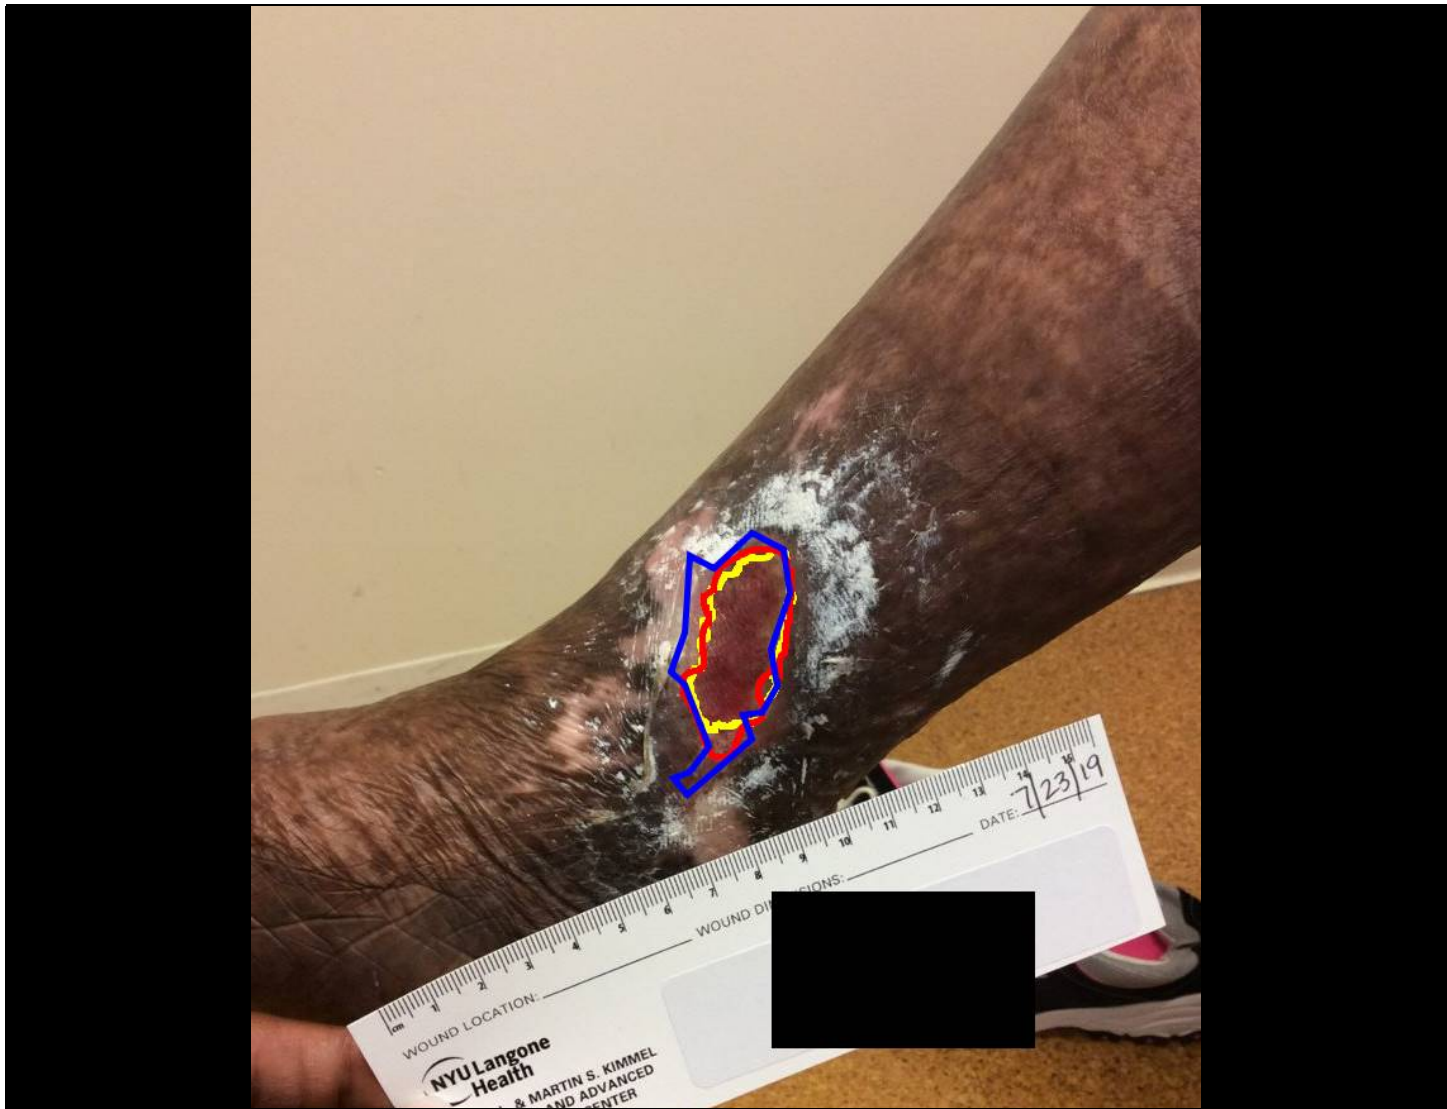

| Tracing Data |                               |                           |                               |
|--------------|-------------------------------|---------------------------|-------------------------------|
| Tracer:      | Wound Area (px <sup>2</sup> ) | Ruler Calibration (px/cm) | Wound Area (cm <sup>2</sup> ) |
| H1           | 7643                          | 38.3                      | 5.20                          |
| H2           | 8775                          | 44.9                      | 4.34                          |
| AI           | 11274                         | 37.5                      | 8.00                          |

| Tracing Comparisons     |                     |                     |                     |                     |
|-------------------------|---------------------|---------------------|---------------------|---------------------|
| Difference Metric:      | Human-Human         |                     | Human-AI            |                     |
|                         | H1(ref)<br>H2(test) | H2(ref)<br>H1(test) | H1(ref)<br>AI(test) | H2(ref)<br>AI(test) |
| False Negative Area (%) | 4.3                 | 16.6                | 3.5                 | 6.1                 |
| False Positive Area (%) | 19.1                | 3.7                 | 51.0                | 34.5                |
| Relative Error (%)      | 14.8                | 12.9                | 47.5                | 28.5                |

| Blinded Attending Surgeon Review |              |                      |                      |                      |              |                         |
|----------------------------------|--------------|----------------------|----------------------|----------------------|--------------|-------------------------|
| Reviewer                         | PGT Estimate | H1 meets definition? | H2 meets definition? | AI meets definition? | Which is AI? | Which is most accurate? |
| 1                                | 90           | Yes                  | Yes                  | Yes                  | H2           | AI                      |
| 2                                | 100          | Yes                  | Yes                  | Yes                  | H1           | H2                      |
| 3                                | 100          | Yes                  | Yes                  | No                   | AI           | H2                      |

| Wound EMR Information |        |     |            |                   |                   |                  |                  |                               |
|-----------------------|--------|-----|------------|-------------------|-------------------|------------------|------------------|-------------------------------|
| Sequential Number     | Gender | Age | Wound Type | Wound Location    | Wound Length (cm) | Wound Width (cm) | Wound Depth (cm) | Wound Area (cm <sup>2</sup> ) |
| 59                    | F      | 68  | Venous     | Right lateral leg | 8.0               | 1.0              |                  | 8.00                          |

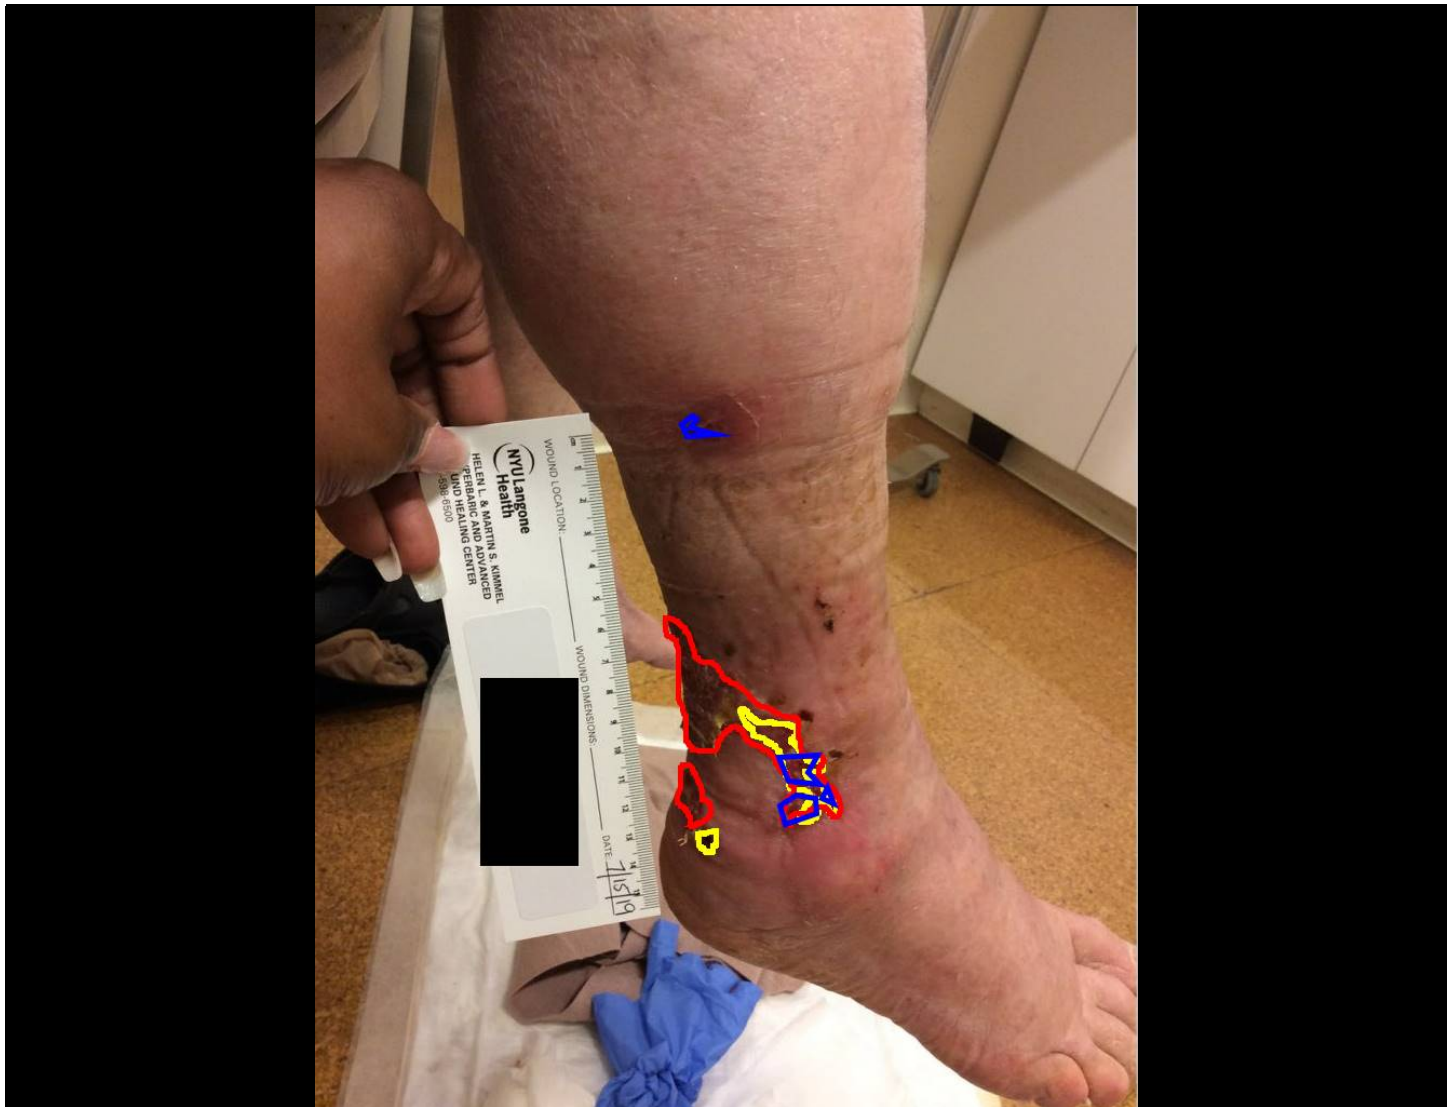

| Tracing Data |                               |                           |                               |
|--------------|-------------------------------|---------------------------|-------------------------------|
| Tracer:      | Wound Area (px <sup>2</sup> ) | Ruler Calibration (px/cm) | Wound Area (cm <sup>2</sup> ) |
| H1           | 2616                          | 27.1                      | 3.56                          |
| H2           | 9621                          | 36.1                      | 7.37                          |
| AI           | 1574                          | 26.2                      | 2.30                          |

| Tracing Comparisons     |                     |                     |                     |                     |
|-------------------------|---------------------|---------------------|---------------------|---------------------|
| Difference Metric:      | Human-Human         |                     | Human-AI            |                     |
|                         | H1(ref)<br>H2(test) | H2(ref)<br>H1(test) | H1(ref)<br>AI(test) | H2(ref)<br>AI(test) |
| False Negative Area (%) | 17.0                | 77.4                | 69.3                | 87.8                |
| False Positive Area (%) | 284.7               | 4.6                 | 29.4                | 4.1                 |
| Relative Error (%)      | 267.8               | 72.8                | 39.8                | 83.6                |

| Blinded Attending Surgeon Review |              |                      |                      |                      |              |                         |
|----------------------------------|--------------|----------------------|----------------------|----------------------|--------------|-------------------------|
| Reviewer                         | PGT Estimate | H1 meets definition? | H2 meets definition? | AI meets definition? | Which is AI? | Which is most accurate? |
| 1                                | 90           | No                   | Yes                  | No                   | H1           | H2                      |
| 2                                | 70           | Yes                  | Yes                  | No                   | H1           | AI                      |
| 3                                | 100          | No                   | Yes                  | No                   | H2           | H1                      |

| Wound EMR Information |        |     |            |                |                   |                  |                  |                               |
|-----------------------|--------|-----|------------|----------------|-------------------|------------------|------------------|-------------------------------|
| Sequential Number     | Gender | Age | Wound Type | Wound Location | Wound Length (cm) | Wound Width (cm) | Wound Depth (cm) | Wound Area (cm <sup>2</sup> ) |
| 60                    | F      | 37  | Surgical   | Left breast    | 1.0               | 1.0              |                  | 1.00                          |

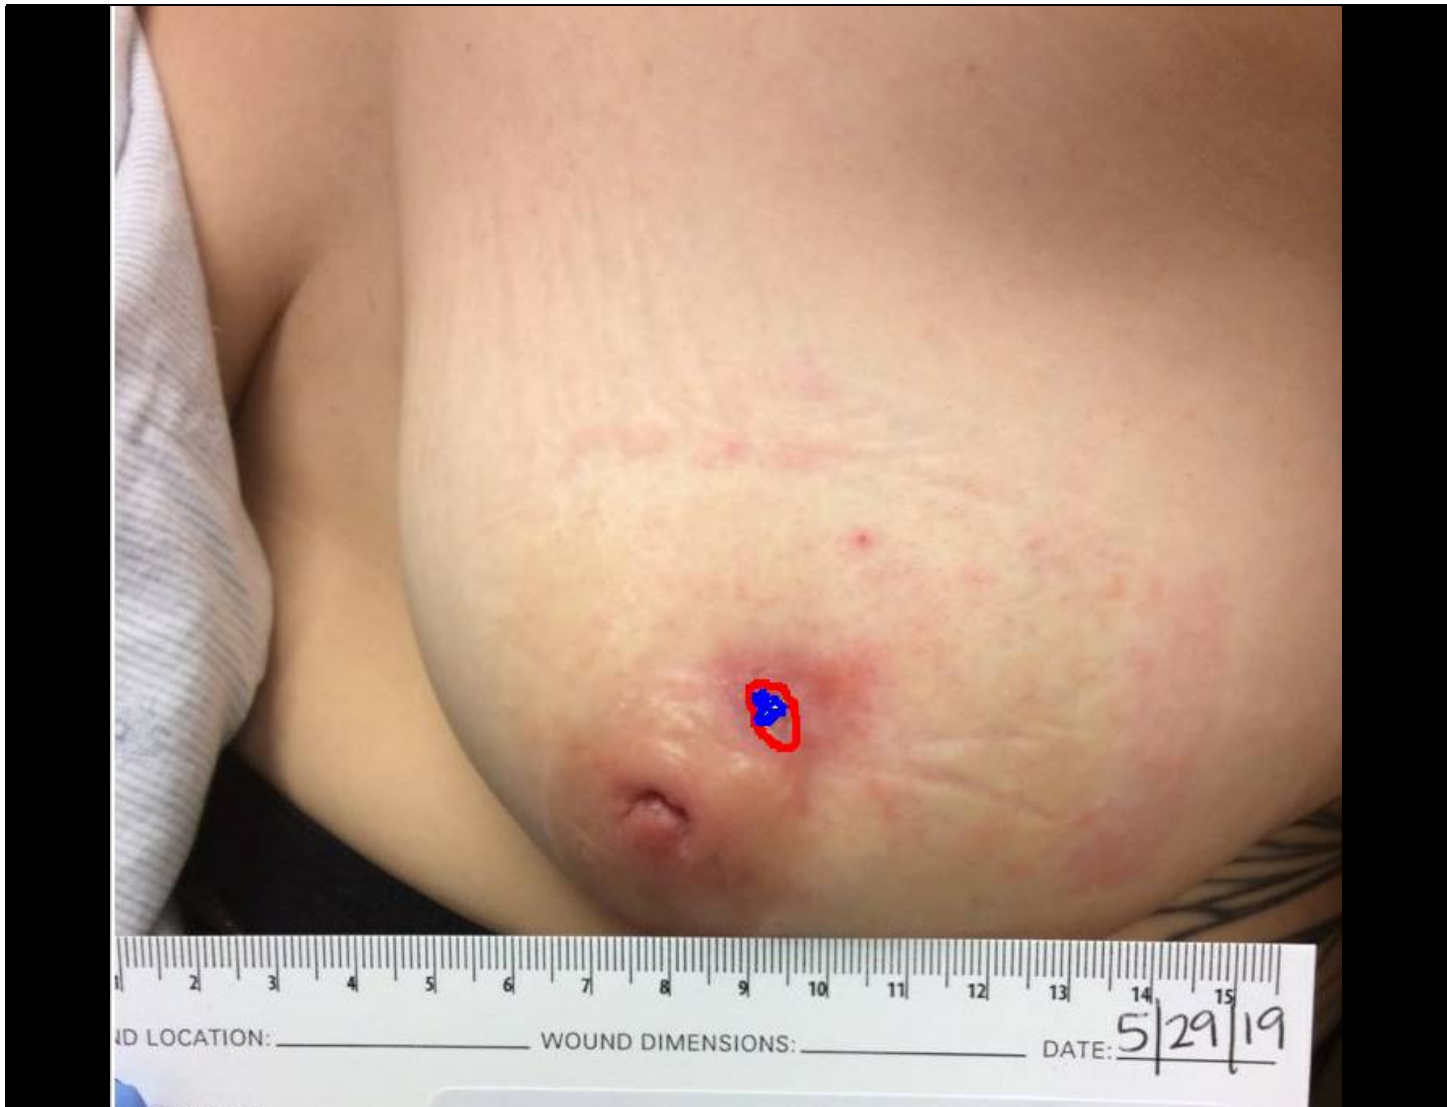

| Tracing Data |                               |                           |                               |
|--------------|-------------------------------|---------------------------|-------------------------------|
| Tracer:      | Wound Area (px <sup>2</sup> ) | Ruler Calibration (px/cm) | Wound Area (cm <sup>2</sup> ) |
| H1           | 96                            | 49.0                      | 0.04                          |
| H2           | 849                           | 50.0                      | 0.34                          |
| AI           | 142                           | 37.7                      | 0.10                          |

| Tracing Comparisons     |                     |                     |                     |                     |
|-------------------------|---------------------|---------------------|---------------------|---------------------|
| Difference Metric:      | Human-Human         |                     | Human-AI            |                     |
|                         | H1(ref)<br>H2(test) | H2(ref)<br>H1(test) | H1(ref)<br>AI(test) | H2(ref)<br>AI(test) |
| False Negative Area (%) | 0.0                 | 88.7                | 28.1                | 83.3                |
| False Positive Area (%) | 784.4               | 0.0                 | 76.0                | 0.0                 |
| Relative Error (%)      | 784.4               | 88.7                | 47.9                | 83.3                |

| Blinded Attending Surgeon Review |              |                      |                      |                      |              |                         |
|----------------------------------|--------------|----------------------|----------------------|----------------------|--------------|-------------------------|
| Reviewer                         | PGT Estimate | H1 meets definition? | H2 meets definition? | AI meets definition? | Which is AI? | Which is most accurate? |
| 1                                | 90           | Yes                  | Yes                  | Yes                  | AI           | H1                      |
| 2                                | 100          | Yes                  | Yes                  | Yes                  | AI           | H1                      |
| 3                                | 100          | Yes                  | No                   | Yes                  | H1           | AI                      |

| Wound EMR Information |        |     |            |                 |                   |                  |                  |                               |
|-----------------------|--------|-----|------------|-----------------|-------------------|------------------|------------------|-------------------------------|
| Sequential Number     | Gender | Age | Wound Type | Wound Location  | Wound Length (cm) | Wound Width (cm) | Wound Depth (cm) | Wound Area (cm <sup>2</sup> ) |
| 61                    | F      | 33  | Diabetic   | Right first toe |                   |                  |                  |                               |

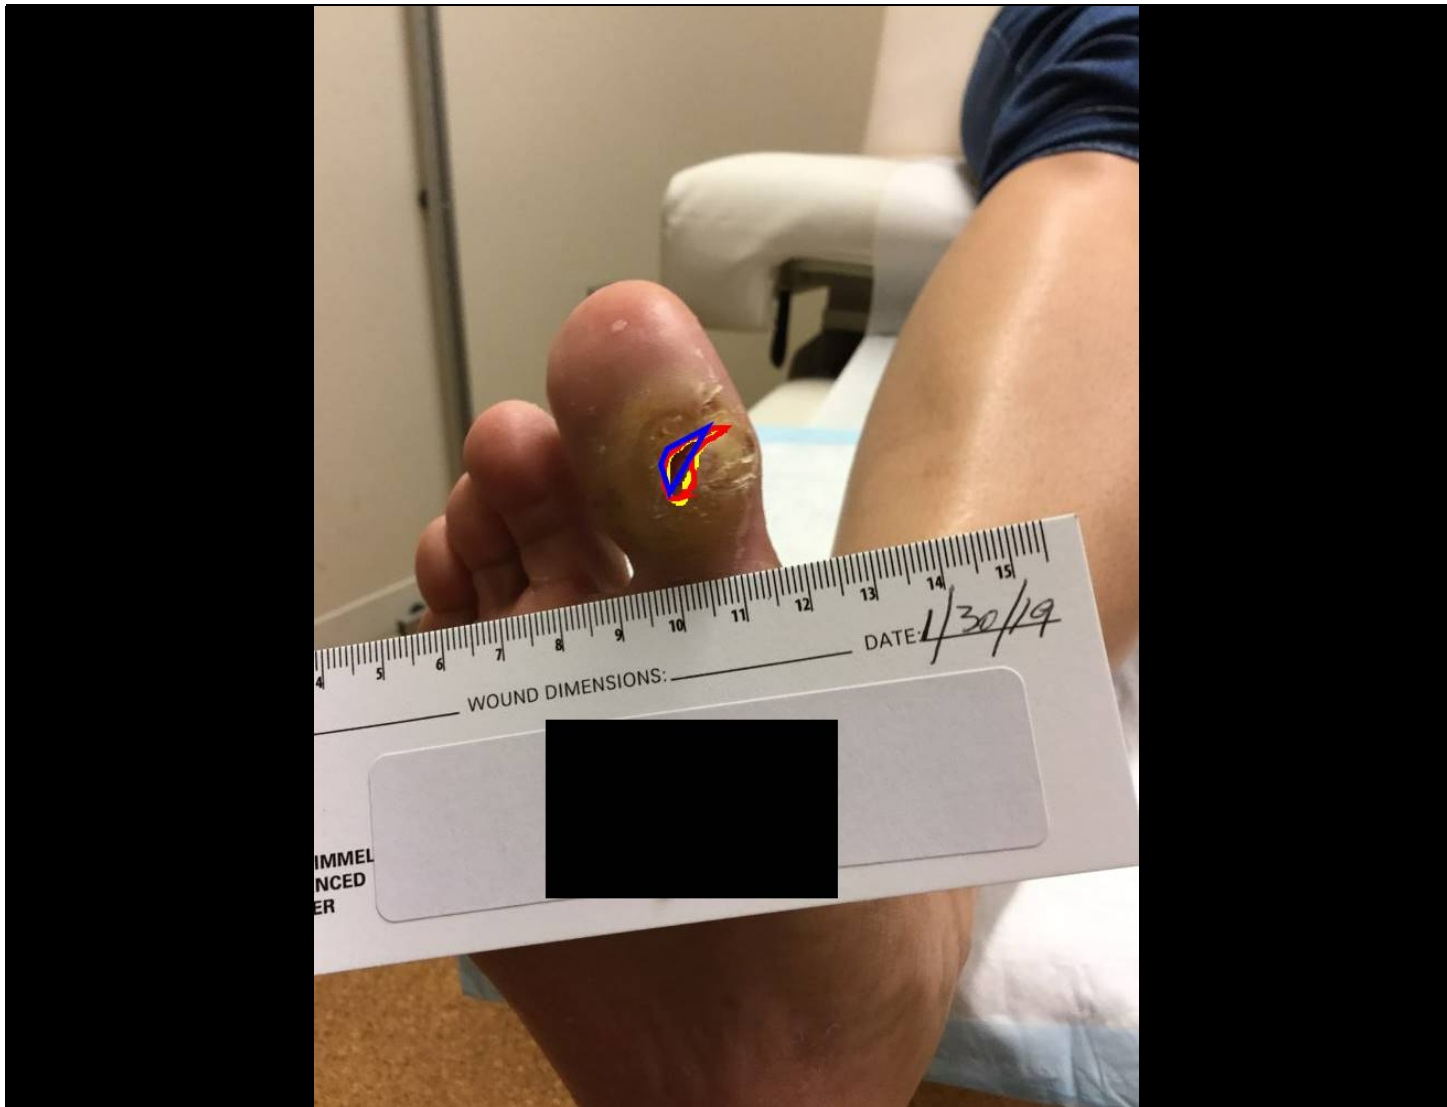

| Tracing Data |                               |                           |                               |
|--------------|-------------------------------|---------------------------|-------------------------------|
| Tracer:      | Wound Area (px <sup>2</sup> ) | Ruler Calibration (px/cm) | Wound Area (cm <sup>2</sup> ) |
| H1           | 1234                          | 57.2                      | 0.38                          |
| H2           | 1347                          | 59.0                      | 0.39                          |
| AI           | 881                           | 54.2                      | 0.30                          |

| Tracing Comparisons     |                     |                     |                     |                     |
|-------------------------|---------------------|---------------------|---------------------|---------------------|
| Difference Metric:      | Human-Human         |                     | Human-AI            |                     |
|                         | H1(ref)<br>H2(test) | H2(ref)<br>H1(test) | H1(ref)<br>AI(test) | H2(ref)<br>AI(test) |
| False Negative Area (%) | 9.5                 | 17.1                | 45.5                | 44.8                |
| False Positive Area (%) | 18.6                | 8.7                 | 16.9                | 10.2                |
| Relative Error (%)      | 9.2                 | 8.4                 | 28.6                | 34.6                |

| Blinded Attending Surgeon Review |              |                      |                      |                      |              |                         |
|----------------------------------|--------------|----------------------|----------------------|----------------------|--------------|-------------------------|
| Reviewer                         | PGT Estimate | H1 meets definition? | H2 meets definition? | AI meets definition? | Which is AI? | Which is most accurate? |
| 1                                | 90           | Yes                  | Yes                  | Yes                  | H2           | H1                      |
| 2                                | 30           | Yes                  | Yes                  | Yes                  | H2           | H1                      |
| 3                                | 100          | Yes                  | Yes                  | No                   | AI           | H2                      |

| Wound EMR Information |        |     |            |                    |                   |                  |                  |                               |
|-----------------------|--------|-----|------------|--------------------|-------------------|------------------|------------------|-------------------------------|
| Sequential Number     | Gender | Age | Wound Type | Wound Location     | Wound Length (cm) | Wound Width (cm) | Wound Depth (cm) | Wound Area (cm <sup>2</sup> ) |
| 63                    | M      | 49  | Trauma     | Right anterior leg |                   |                  |                  |                               |

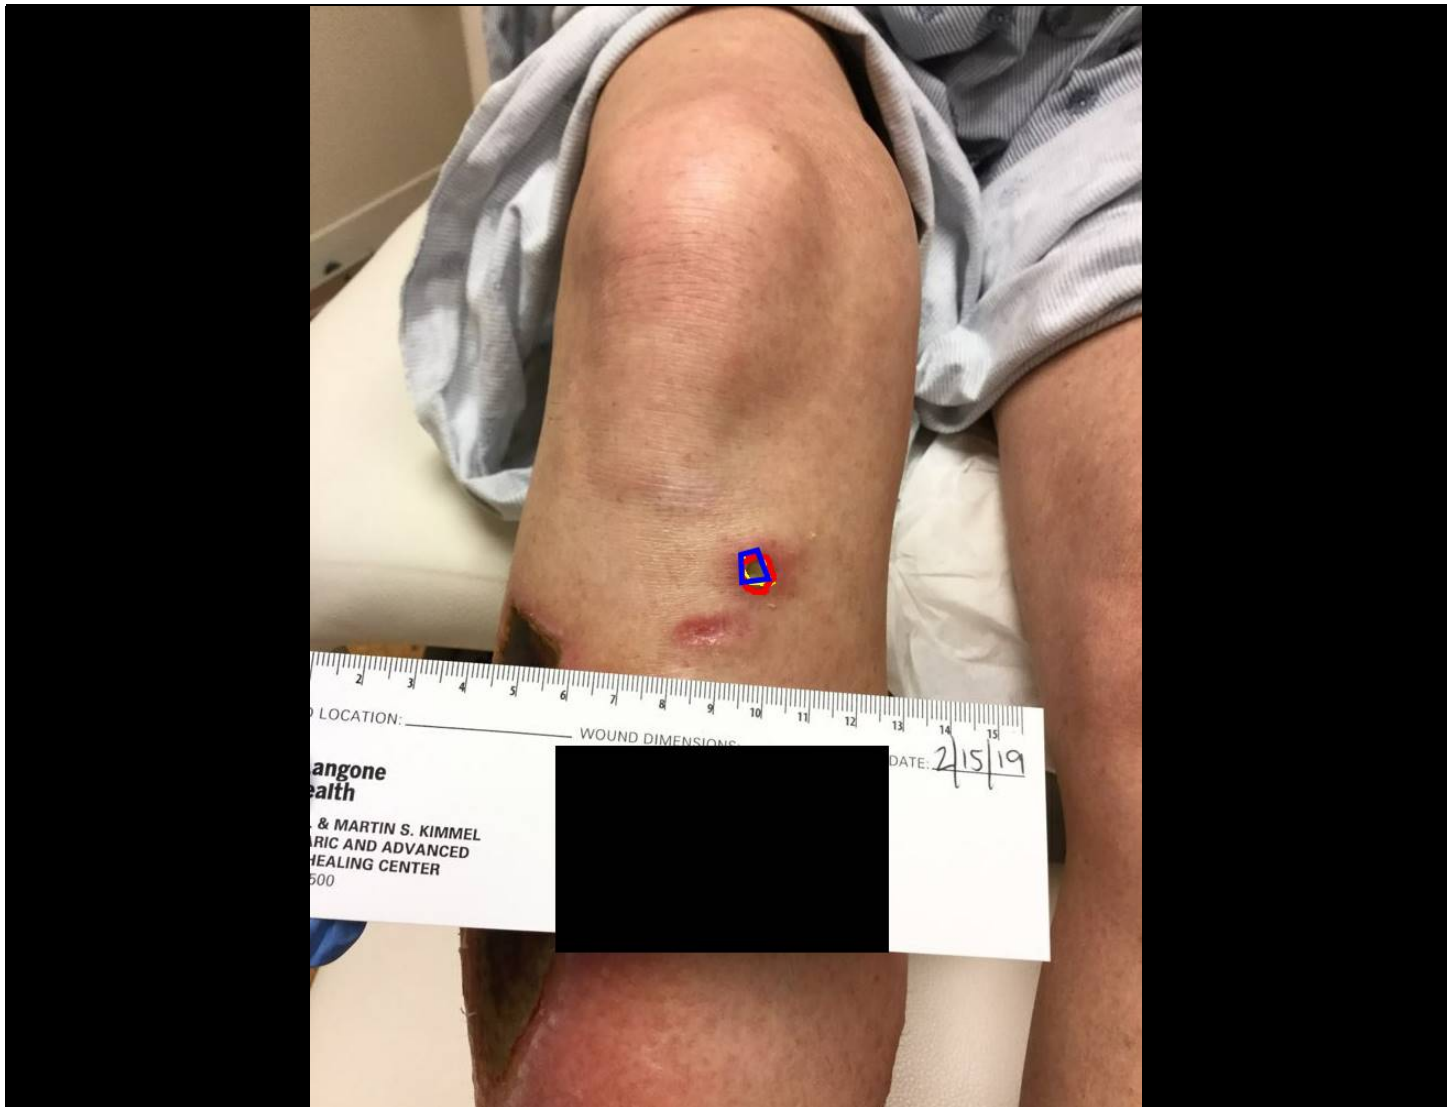

| Tracing Data |                               |                           |                               |
|--------------|-------------------------------|---------------------------|-------------------------------|
| Tracer:      | Wound Area (px <sup>2</sup> ) | Ruler Calibration (px/cm) | Wound Area (cm <sup>2</sup> ) |
| H1           | 7627                          | 47.0                      | 3.45                          |
| H2           | 8081                          | 40.7                      | 4.88                          |
| AI           | 6520                          | 43.8                      | 3.40                          |

| Tracing Comparisons     |                     |                     |                     |                     |
|-------------------------|---------------------|---------------------|---------------------|---------------------|
| Difference Metric:      | Human-Human         |                     | Human-AI            |                     |
|                         | H1(ref)<br>H2(test) | H2(ref)<br>H1(test) | H1(ref)<br>AI(test) | H2(ref)<br>AI(test) |
| False Negative Area (%) | 4.4                 | 9.8                 | 18.8                | 21.9                |
| False Positive Area (%) | 10.3                | 4.1                 | 4.3                 | 2.6                 |
| Relative Error (%)      | 6.0                 | 5.6                 | 14.5                | 19.3                |

| Blinded Attending Surgeon Review |              |                      |                      |                      |              |                         |
|----------------------------------|--------------|----------------------|----------------------|----------------------|--------------|-------------------------|
| Reviewer                         | PGT Estimate | H1 meets definition? | H2 meets definition? | AI meets definition? | Which is AI? | Which is most accurate? |
| 1                                | 100          | Yes                  | Yes                  | No                   | H2           | H2                      |
| 2                                | 100          | Yes                  | Yes                  | Yes                  | AI           | H1                      |
| 3                                | 100          | Yes                  | Yes                  | No                   | H2           | H1                      |

| Wound EMR Information |        |     |            |                 |                   |                  |                  |                               |
|-----------------------|--------|-----|------------|-----------------|-------------------|------------------|------------------|-------------------------------|
| Sequential Number     | Gender | Age | Wound Type | Wound Location  | Wound Length (cm) | Wound Width (cm) | Wound Depth (cm) | Wound Area (cm <sup>2</sup> ) |
| 63                    | F      | 52  | Unknown    | Right lower leg |                   |                  |                  |                               |



| Tracing Data |                               |                           |                               |
|--------------|-------------------------------|---------------------------|-------------------------------|
| Tracer:      | Wound Area (px <sup>2</sup> ) | Ruler Calibration (px/cm) | Wound Area (cm <sup>2</sup> ) |
| H1           | 532                           | 43.3                      | 0.28                          |
| H2           | 723                           | 45.1                      | 0.36                          |
| AI           | 533                           | 36.5                      | 0.40                          |

| Tracing Comparisons     |                     |                     |                     |                     |
|-------------------------|---------------------|---------------------|---------------------|---------------------|
| Difference Metric:      | Human-Human         |                     | Human-AI            |                     |
|                         | H1(ref)<br>H2(test) | H2(ref)<br>H1(test) | H1(ref)<br>AI(test) | H2(ref)<br>AI(test) |
| False Negative Area (%) | 6.6                 | 31.3                | 17.5                | 40.2                |
| False Positive Area (%) | 42.5                | 4.8                 | 17.7                | 14.0                |
| Relative Error (%)      | 35.9                | 26.4                | 0.2                 | 26.3                |

| Blinded Attending Surgeon Review |              |                      |                      |                      |              |                         |
|----------------------------------|--------------|----------------------|----------------------|----------------------|--------------|-------------------------|
| Reviewer                         | PGT Estimate | H1 meets definition? | H2 meets definition? | AI meets definition? | Which is AI? | Which is most accurate? |
| 1                                | 0            | No                   | No                   | No                   | H2           | AI                      |
| 2                                | 0            | Yes                  | Yes                  | Yes                  | H2           | H1                      |
| 3                                | 0            | Yes                  | Yes                  | No                   | AI           | H1                      |

| Wound EMR Information |        |     |            |                 |                   |                  |                  |                               |
|-----------------------|--------|-----|------------|-----------------|-------------------|------------------|------------------|-------------------------------|
| Sequential Number     | Gender | Age | Wound Type | Wound Location  | Wound Length (cm) | Wound Width (cm) | Wound Depth (cm) | Wound Area (cm <sup>2</sup> ) |
| 64                    | M      | 41  | Pressure   | Right posterior |                   |                  |                  |                               |

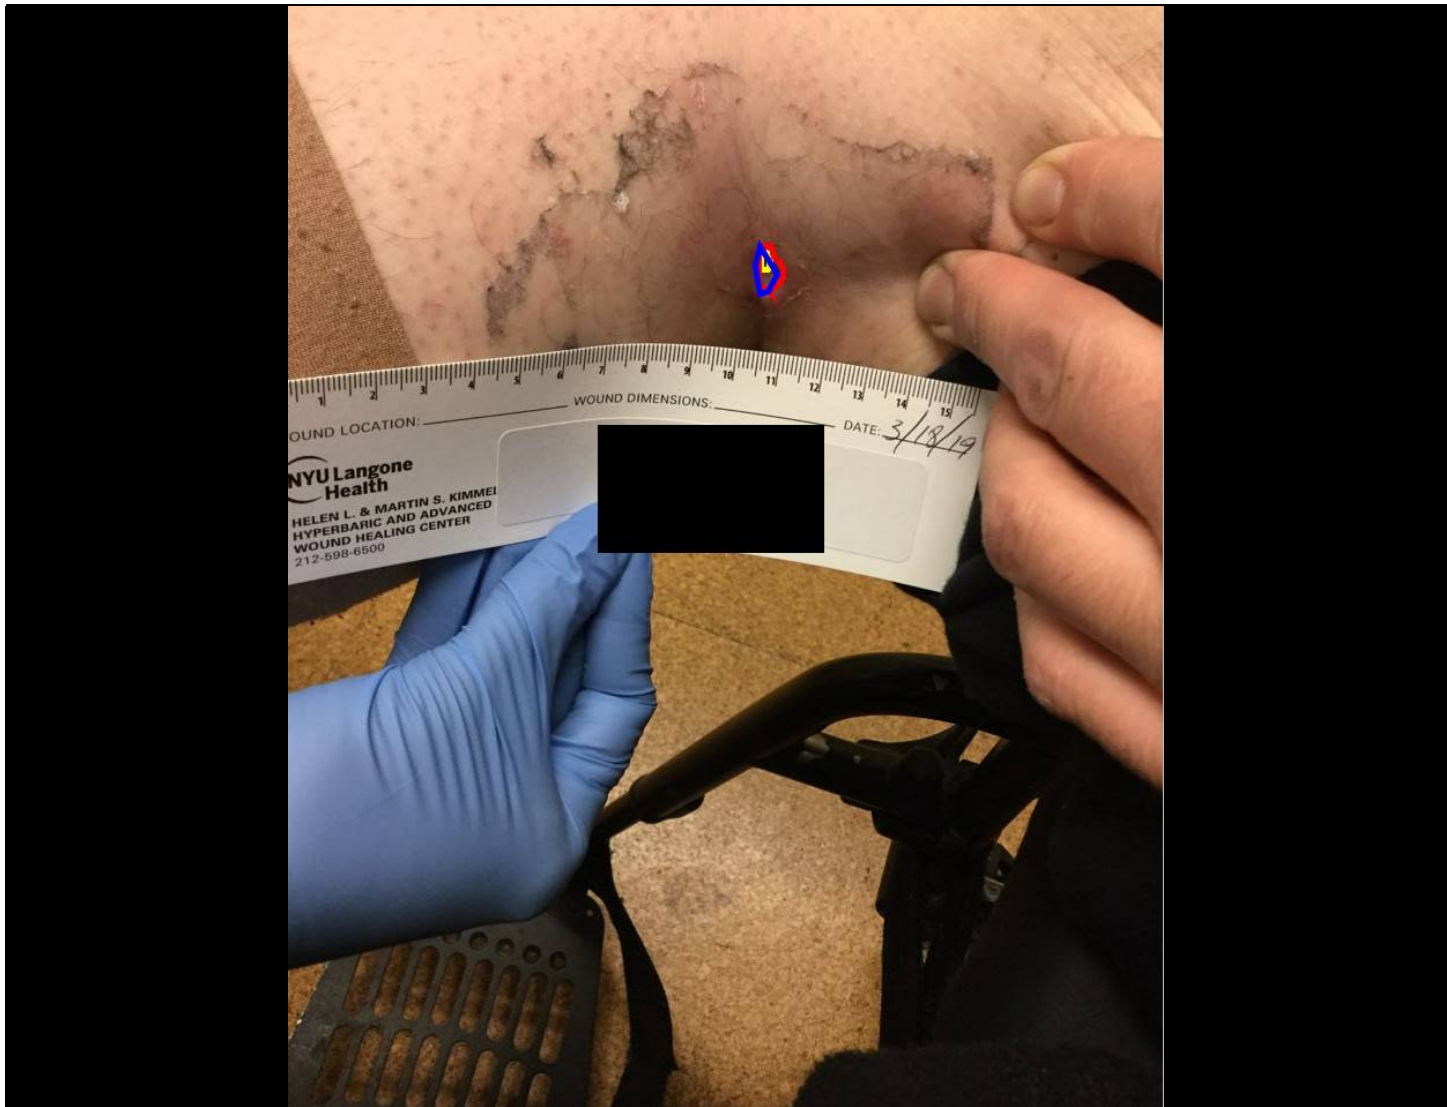

| Tracing Data |                               |                           |                               |
|--------------|-------------------------------|---------------------------|-------------------------------|
| Tracer:      | Wound Area (px <sup>2</sup> ) | Ruler Calibration (px/cm) | Wound Area (cm <sup>2</sup> ) |
| H1           | 111                           | 39.0                      | 0.07                          |
| H2           | 595                           | 39.1                      | 0.39                          |
| AI           | 448                           | 33.5                      | 0.40                          |

| Tracing Comparisons     |                     |                     |                     |                     |
|-------------------------|---------------------|---------------------|---------------------|---------------------|
| Difference Metric:      | Human-Human         |                     | Human-AI            |                     |
|                         | H1(ref)<br>H2(test) | H2(ref)<br>H1(test) | H1(ref)<br>AI(test) | H2(ref)<br>AI(test) |
| False Negative Area (%) | 0.0                 | 81.3                | 26.1                | 40.0                |
| False Positive Area (%) | 436.0               | 0.0                 | 329.7               | 15.3                |
| Relative Error (%)      | 436.0               | 81.3                | 303.6               | 24.7                |

| Blinded Attending Surgeon Review |              |                      |                      |                      |              |                         |
|----------------------------------|--------------|----------------------|----------------------|----------------------|--------------|-------------------------|
| Reviewer                         | PGT Estimate | H1 meets definition? | H2 meets definition? | AI meets definition? | Which is AI? | Which is most accurate? |
| 1                                | 20           | No                   | Yes                  | Yes                  | H1           | H1                      |
| 2                                | 50           | Yes                  | Yes                  | Yes                  | H1           | H2                      |
| 3                                | 0            | No                   | Yes                  | Yes                  | H1           | AI                      |



| Wound EMR Information |        |     |            |                |                   |                  |                  |                               |
|-----------------------|--------|-----|------------|----------------|-------------------|------------------|------------------|-------------------------------|
| Sequential Number     | Gender | Age | Wound Type | Wound Location | Wound Length (cm) | Wound Width (cm) | Wound Depth (cm) | Wound Area (cm <sup>2</sup> ) |
| 65                    | F      | 22  | Surgical   | Left breast    |                   |                  |                  |                               |

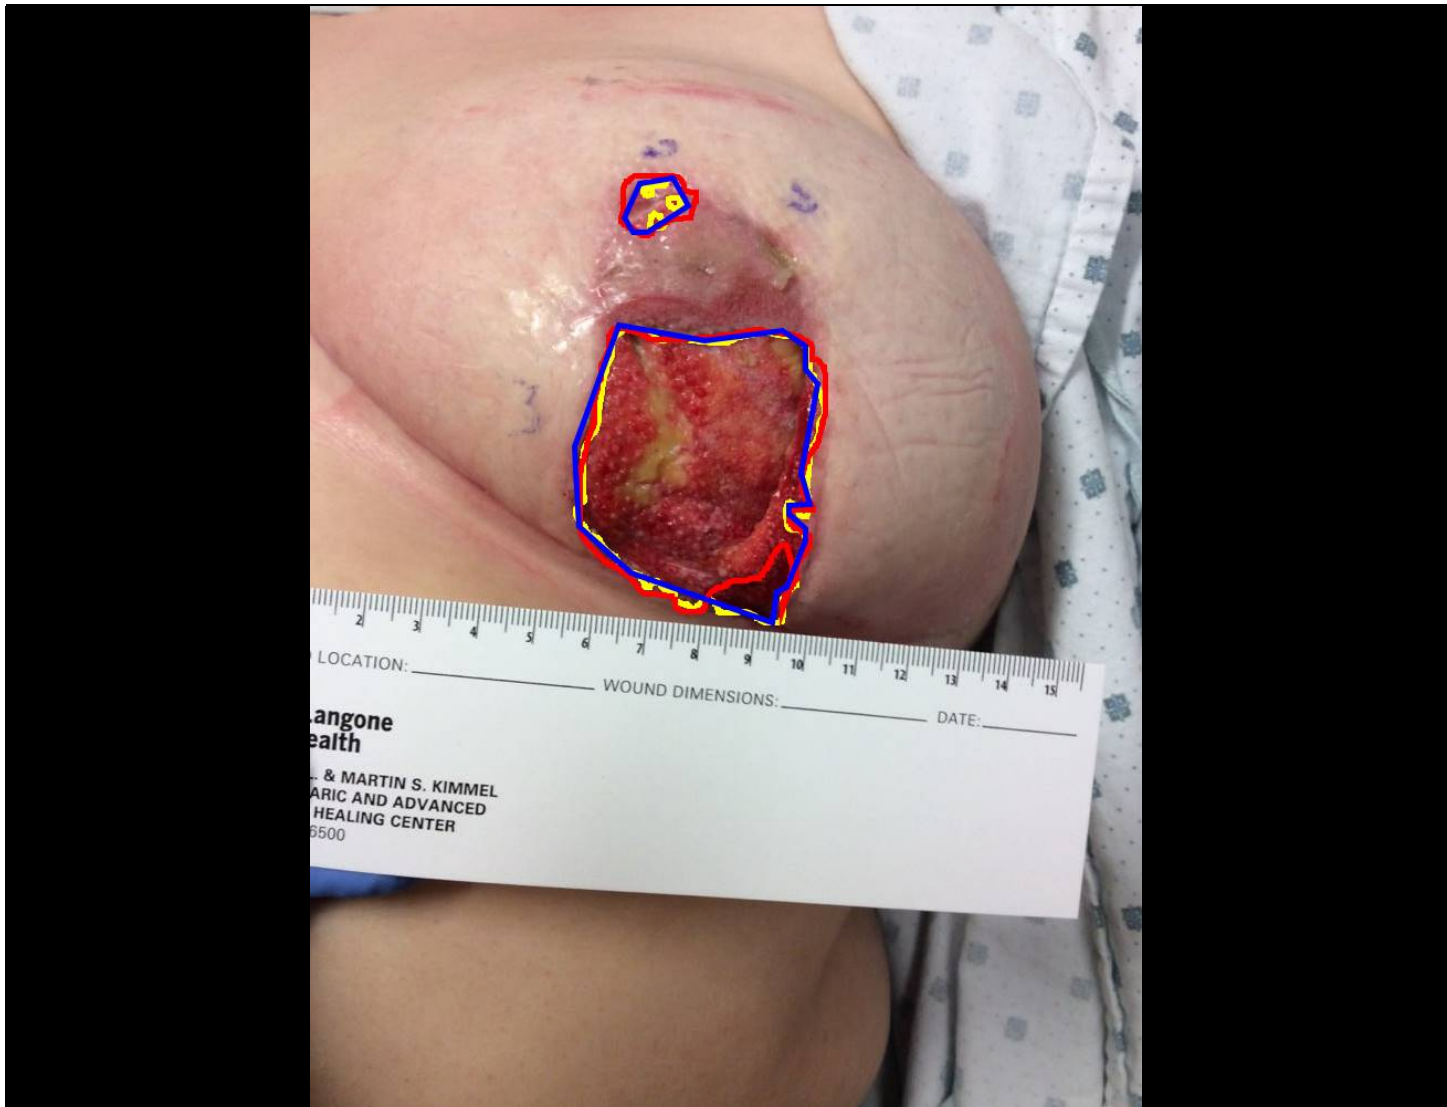

| Tracing Data |                               |                           |                               |
|--------------|-------------------------------|---------------------------|-------------------------------|
| Tracer:      | Wound Area (px <sup>2</sup> ) | Ruler Calibration (px/cm) | Wound Area (cm <sup>2</sup> ) |
| H1           | 45414                         | 48.7                      | 19.12                         |
| H2           | 47165                         | 48.8                      | 19.82                         |
| AI           | 46845                         | 48.4                      | 20.00                         |

| Tracing Comparisons     |                     |                     |                     |                     |
|-------------------------|---------------------|---------------------|---------------------|---------------------|
| Difference Metric:      | Human-Human         |                     | Human-AI            |                     |
|                         | H1(ref)<br>H2(test) | H2(ref)<br>H1(test) | H1(ref)<br>AI(test) | H2(ref)<br>AI(test) |
| False Negative Area (%) | 6.7                 | 10.1                | 3.6                 | 7.8                 |
| False Positive Area (%) | 10.5                | 6.4                 | 6.8                 | 7.1                 |
| Relative Error (%)      | 3.9                 | 3.7                 | 3.2                 | 0.7                 |

| Blinded Attending Surgeon Review |              |                      |                      |                      |              |                         |
|----------------------------------|--------------|----------------------|----------------------|----------------------|--------------|-------------------------|
| Reviewer                         | PGT Estimate | H1 meets definition? | H2 meets definition? | AI meets definition? | Which is AI? | Which is most accurate? |
| 1                                | 80           | Yes                  | Yes                  | Yes                  | H2           | H1                      |
| 2                                | 90           | Yes                  | Yes                  | Yes                  | H2           | AI                      |
| 3                                | 80           | No                   | Yes                  | Yes                  | H2           | AI                      |

| Wound EMR Information |        |     |            |                    |                   |                  |                  |                               |
|-----------------------|--------|-----|------------|--------------------|-------------------|------------------|------------------|-------------------------------|
| Sequential Number     | Gender | Age | Wound Type | Wound Location     | Wound Length (cm) | Wound Width (cm) | Wound Depth (cm) | Wound Area (cm <sup>2</sup> ) |
| 67                    | F      | 69  | Trauma     | Right anterior leg |                   |                  |                  |                               |

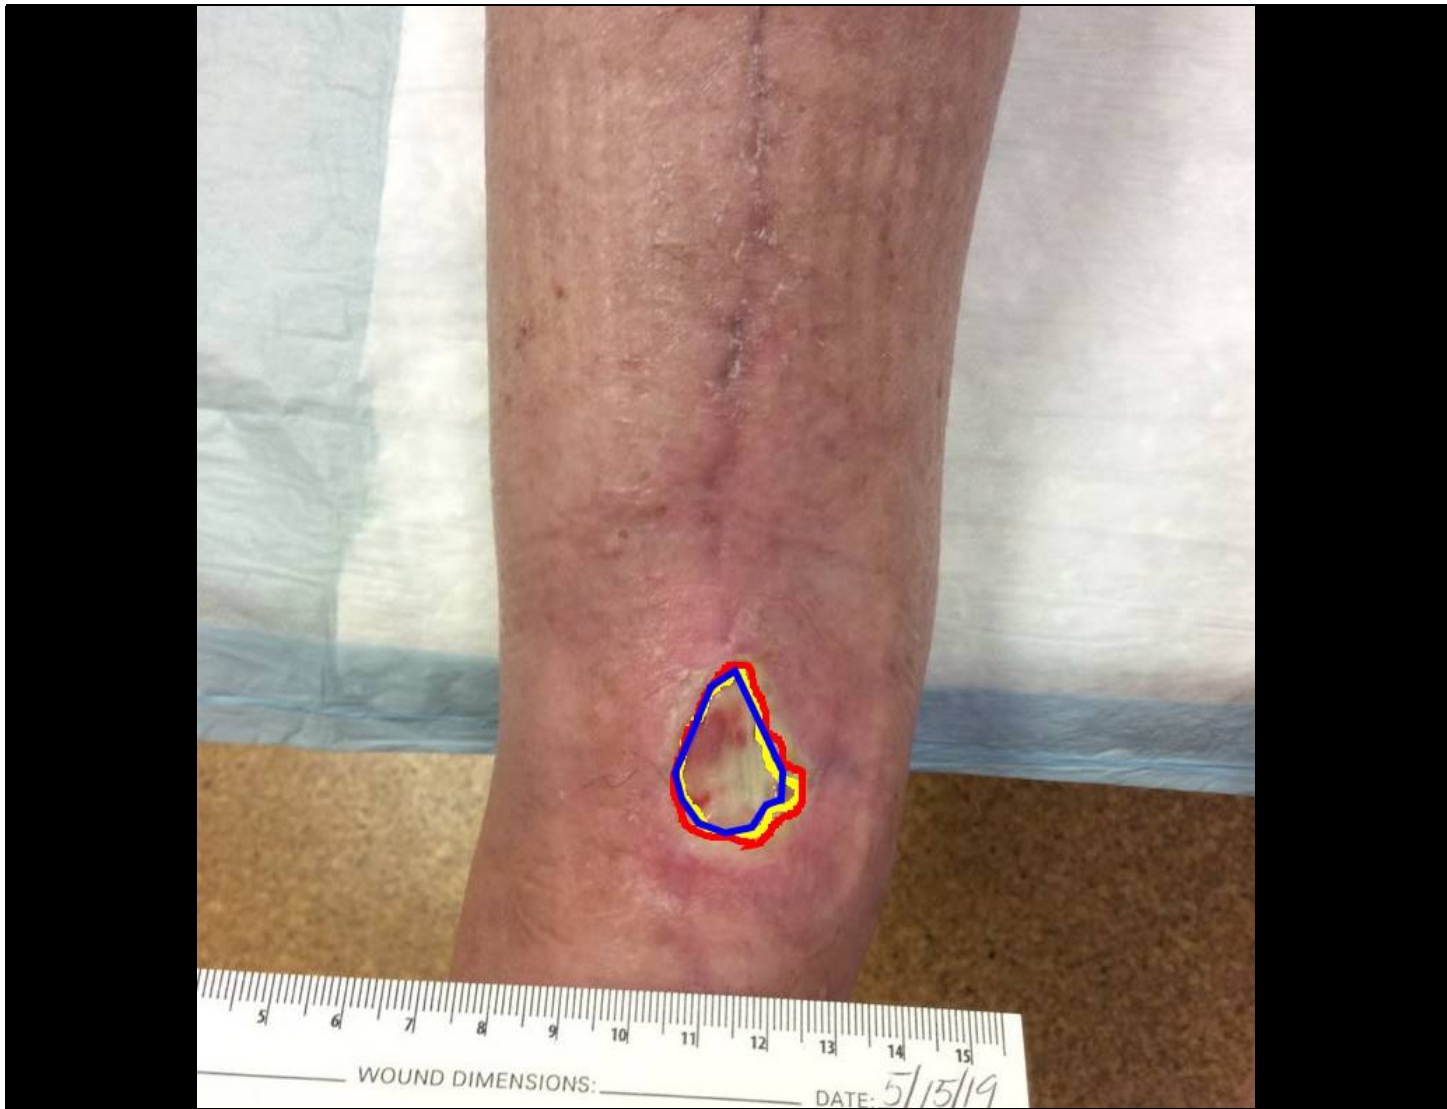

| Tracing Data |                               |                           |                               |
|--------------|-------------------------------|---------------------------|-------------------------------|
| Tracer:      | Wound Area (px <sup>2</sup> ) | Ruler Calibration (px/cm) | Wound Area (cm <sup>2</sup> ) |
| H1           | 5985                          | 49.4                      | 2.45                          |
| H2           | 7633                          | 39.7                      | 4.85                          |
| AI           | 5708                          | 48.8                      | 2.40                          |

| Tracing Comparisons     |                     |                     |                     |                     |
|-------------------------|---------------------|---------------------|---------------------|---------------------|
| Difference Metric:      | Human-Human         |                     | Human-AI            |                     |
|                         | H1(ref)<br>H2(test) | H2(ref)<br>H1(test) | H1(ref)<br>AI(test) | H2(ref)<br>AI(test) |
| False Negative Area (%) | 0.1                 | 21.7                | 10.4                | 25.2                |
| False Positive Area (%) | 27.7                | 0.1                 | 5.8                 | 0.0                 |
| Relative Error (%)      | 27.5                | 21.6                | 4.6                 | 25.2                |

| Blinded Attending Surgeon Review |              |                      |                      |                      |              |                         |
|----------------------------------|--------------|----------------------|----------------------|----------------------|--------------|-------------------------|
| Reviewer                         | PGT Estimate | H1 meets definition? | H2 meets definition? | AI meets definition? | Which is AI? | Which is most accurate? |
| 1                                | 10           | Yes                  | Yes                  | Yes                  | H2           | H2                      |
| 2                                | 50           | Yes                  | Yes                  | Yes                  | AI           | H2                      |
| 3                                | 40           | Yes                  | Yes                  | Yes                  | H1           | H1                      |

| Wound EMR Information |        |     |            |                |                   |                  |                  |                               |
|-----------------------|--------|-----|------------|----------------|-------------------|------------------|------------------|-------------------------------|
| Sequential Number     | Gender | Age | Wound Type | Wound Location | Wound Length (cm) | Wound Width (cm) | Wound Depth (cm) | Wound Area (cm <sup>2</sup> ) |
| 70                    | F      | 73  |            | Right elbow    |                   |                  |                  |                               |

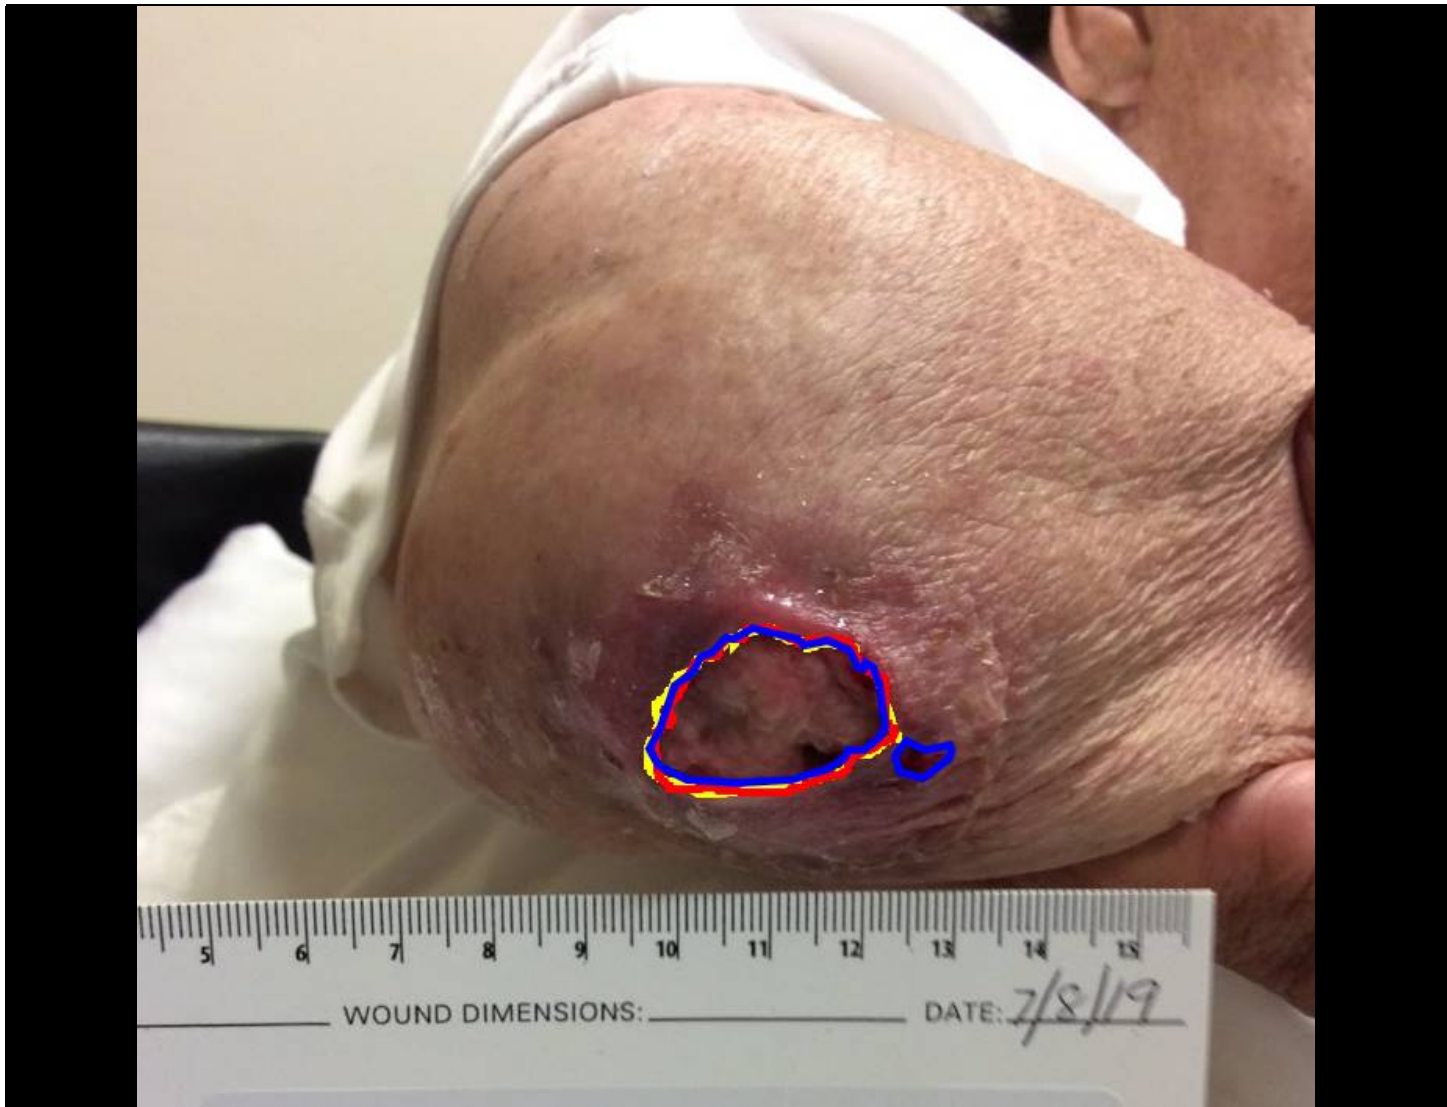

| Tracing Data |                               |                           |                               |
|--------------|-------------------------------|---------------------------|-------------------------------|
| Tracer:      | Wound Area (px <sup>2</sup> ) | Ruler Calibration (px/cm) | Wound Area (cm <sup>2</sup> ) |
| H1           | 11976                         | 59.2                      | 3.42                          |
| H2           | 11892                         | 52.3                      | 4.34                          |
| AI           | 11493                         | 57.3                      | 3.50                          |

| Tracing Comparisons     |                     |                     |                     |                     |
|-------------------------|---------------------|---------------------|---------------------|---------------------|
| Difference Metric:      | Human-Human         |                     | Human-AI            |                     |
|                         | H1(ref)<br>H2(test) | H2(ref)<br>H1(test) | H1(ref)<br>AI(test) | H2(ref)<br>AI(test) |
| False Negative Area (%) | 4.6                 | 3.9                 | 9.2                 | 9.5                 |
| False Positive Area (%) | 3.9                 | 4.6                 | 5.2                 | 6.1                 |
| Relative Error (%)      | 0.7                 | 0.7                 | 4.0                 | 3.4                 |

| Blinded Attending Surgeon Review |              |                      |                      |                      |              |                         |
|----------------------------------|--------------|----------------------|----------------------|----------------------|--------------|-------------------------|
| Reviewer                         | PGT Estimate | H1 meets definition? | H2 meets definition? | AI meets definition? | Which is AI? | Which is most accurate? |
| 1                                | 20           | No                   | No                   | Yes                  | H1           | H1                      |
| 2                                | 80           | Yes                  | Yes                  | Yes                  | H2           | H1                      |
| 3                                | 20           | Yes                  | Yes                  | Yes                  | H1           | AI                      |

| Wound EMR Information |        |     |            |                   |                   |                  |                  |                               |
|-----------------------|--------|-----|------------|-------------------|-------------------|------------------|------------------|-------------------------------|
| Sequential Number     | Gender | Age | Wound Type | Wound Location    | Wound Length (cm) | Wound Width (cm) | Wound Depth (cm) | Wound Area (cm <sup>2</sup> ) |
| 71                    | F      | 78  | Trauma     | Left anterior leg |                   |                  |                  |                               |

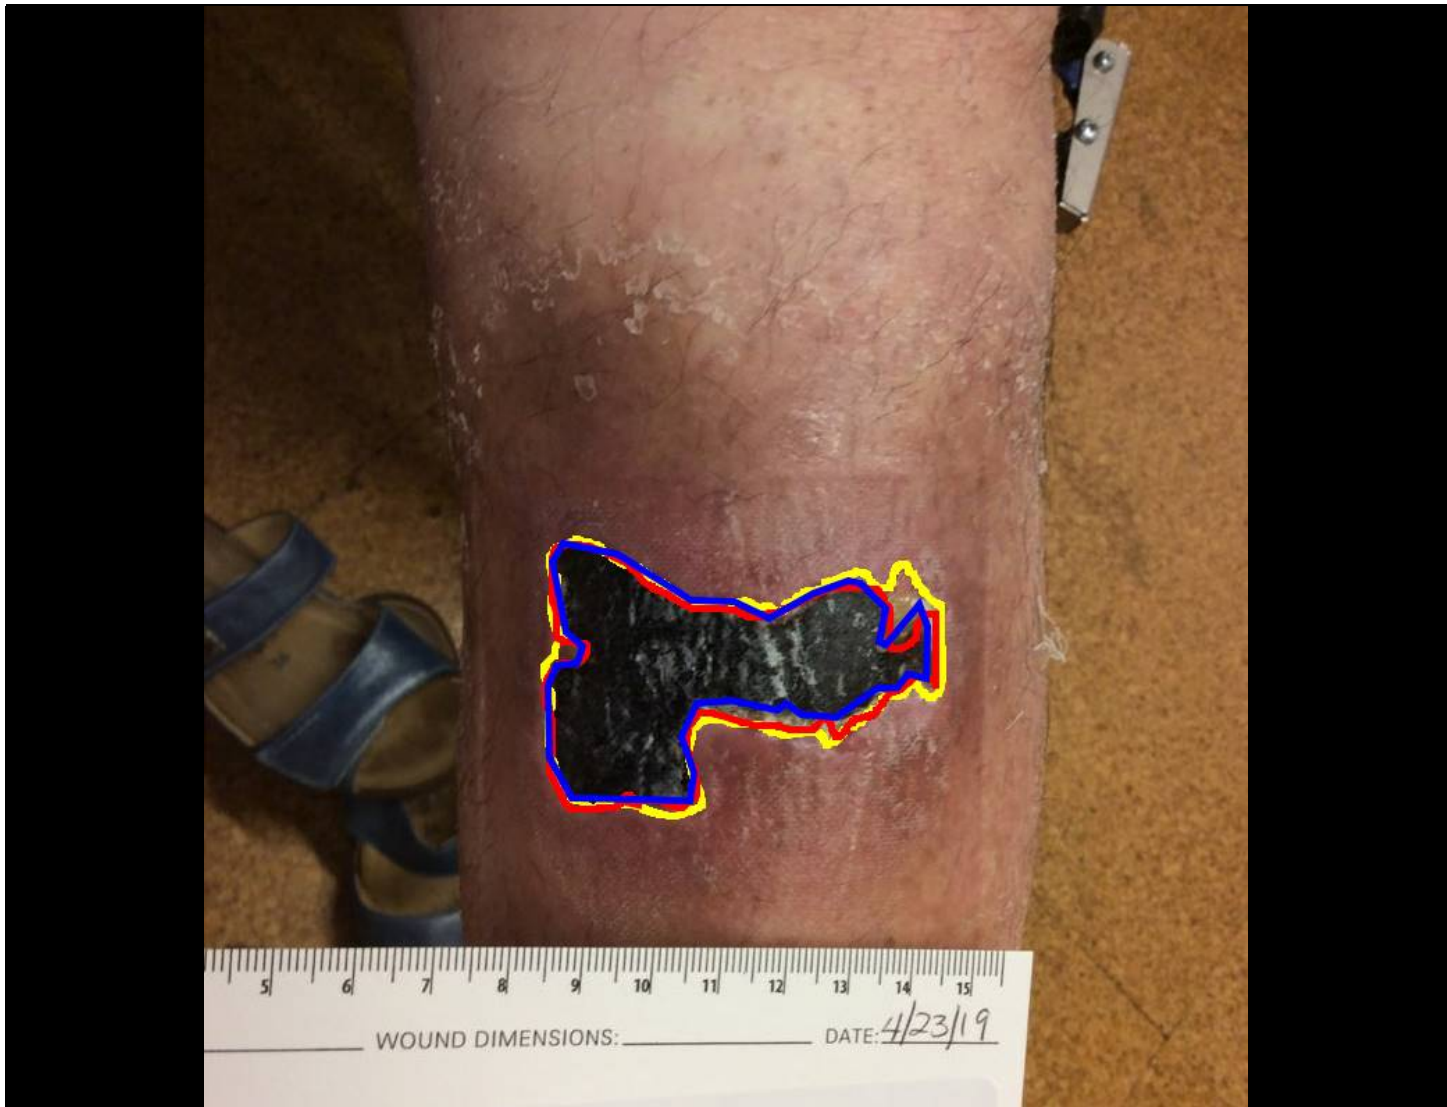

| Tracing Data |                               |                           |                               |
|--------------|-------------------------------|---------------------------|-------------------------------|
| Tracer:      | Wound Area (px <sup>2</sup> ) | Ruler Calibration (px/cm) | Wound Area (cm <sup>2</sup> ) |
| H1           | 33908                         | 48.0                      | 14.72                         |
| H2           | 30001                         | 48.0                      | 13.02                         |
| AI           | 27949                         | 50.9                      | 10.80                         |

| Tracing Comparisons     |                     |                     |                     |                     |
|-------------------------|---------------------|---------------------|---------------------|---------------------|
| Difference Metric:      | Human-Human         |                     | Human-AI            |                     |
|                         | H1(ref)<br>H2(test) | H2(ref)<br>H1(test) | H1(ref)<br>AI(test) | H2(ref)<br>AI(test) |
| False Negative Area (%) | 12.9                | 1.5                 | 18.2                | 10.5                |
| False Positive Area (%) | 1.4                 | 14.6                | 0.7                 | 3.7                 |
| Relative Error (%)      | 11.5                | 13.0                | 17.6                | 6.8                 |

| Blinded Attending Surgeon Review |              |                      |                      |                      |              |                         |
|----------------------------------|--------------|----------------------|----------------------|----------------------|--------------|-------------------------|
| Reviewer                         | PGT Estimate | H1 meets definition? | H2 meets definition? | AI meets definition? | Which is AI? | Which is most accurate? |
| 1                                | 0            | Yes                  | No                   | No                   | H2           | H1                      |
| 2                                | 0            | Yes                  | Yes                  | Yes                  | AI           | AI                      |
| 3                                | 0            | No                   | Yes                  | Yes                  | H2           | H1                      |

| Wound EMR Information |        |     |            |                |                   |                  |                  |                               |
|-----------------------|--------|-----|------------|----------------|-------------------|------------------|------------------|-------------------------------|
| Sequential Number     | Gender | Age | Wound Type | Wound Location | Wound Length (cm) | Wound Width (cm) | Wound Depth (cm) | Wound Area (cm <sup>2</sup> ) |
| 72                    | F      | 51  | Surgical   | Right breast   | 16.0              | 3.0              |                  | 48.00                         |

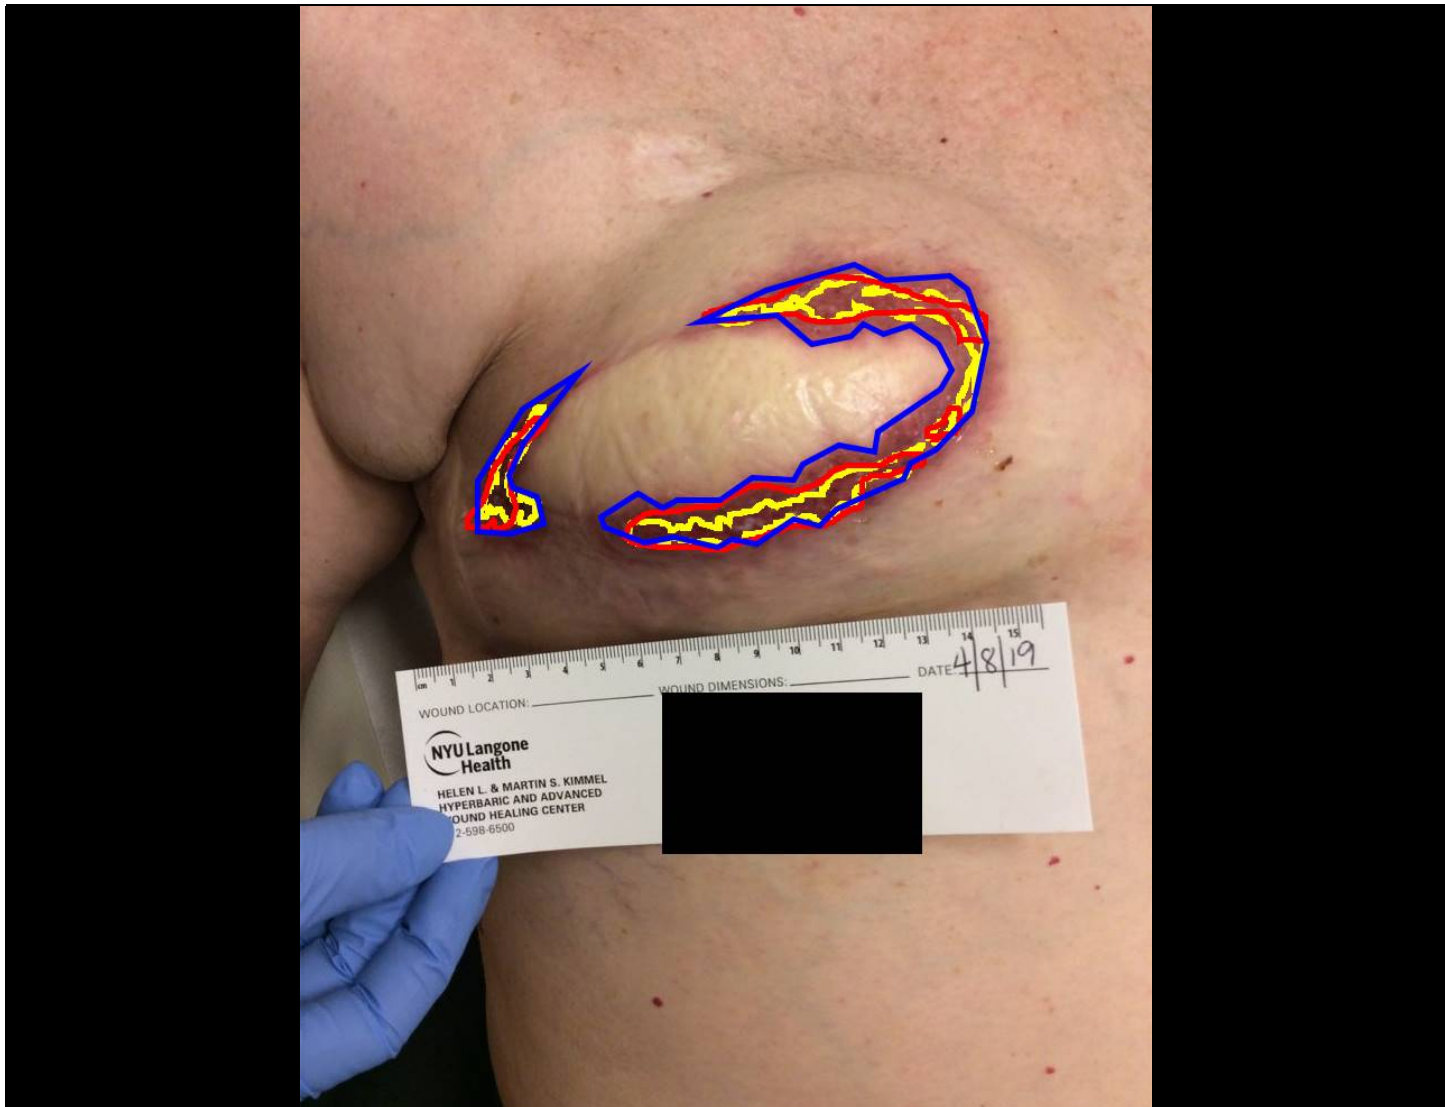

| Tracing Data |                               |                           |                               |
|--------------|-------------------------------|---------------------------|-------------------------------|
| Tracer:      | Wound Area (px <sup>2</sup> ) | Ruler Calibration (px/cm) | Wound Area (cm <sup>2</sup> ) |
| H1           | 11407                         | 46.0                      | 5.39                          |
| H2           | 16376                         | 35.8                      | 12.81                         |
| AI           | 29784                         | 33.7                      | 26.20                         |

| Tracing Comparisons     |                     |                     |                     |                     |
|-------------------------|---------------------|---------------------|---------------------|---------------------|
| Difference Metric:      | Human-Human         |                     | Human-AI            |                     |
|                         | H1(ref)<br>H2(test) | H2(ref)<br>H1(test) | H1(ref)<br>AI(test) | H2(ref)<br>AI(test) |
| False Negative Area (%) | 14.3                | 40.3                | 2.6                 | 7.7                 |
| False Positive Area (%) | 57.9                | 10.0                | 163.8               | 89.6                |
| Relative Error (%)      | 43.6                | 30.3                | 161.1               | 81.9                |

| Blinded Attending Surgeon Review |              |                      |                      |                      |              |                         |
|----------------------------------|--------------|----------------------|----------------------|----------------------|--------------|-------------------------|
| Reviewer                         | PGT Estimate | H1 meets definition? | H2 meets definition? | AI meets definition? | Which is AI? | Which is most accurate? |
| 1                                | 60           | Yes                  | Yes                  | Yes                  | H1           | H1                      |
| 2                                | 100          | Yes                  | Yes                  | Yes                  | H2           | H2                      |
| 3                                | 100          | No                   | No                   | Yes                  | H2           | AI                      |

| Wound EMR Information |        |     |            |                   |                   |                  |                  |                               |
|-----------------------|--------|-----|------------|-------------------|-------------------|------------------|------------------|-------------------------------|
| Sequential Number     | Gender | Age | Wound Type | Wound Location    | Wound Length (cm) | Wound Width (cm) | Wound Depth (cm) | Wound Area (cm <sup>2</sup> ) |
| 73                    | F      | 38  | Venous     | Left medial ankle |                   |                  |                  |                               |

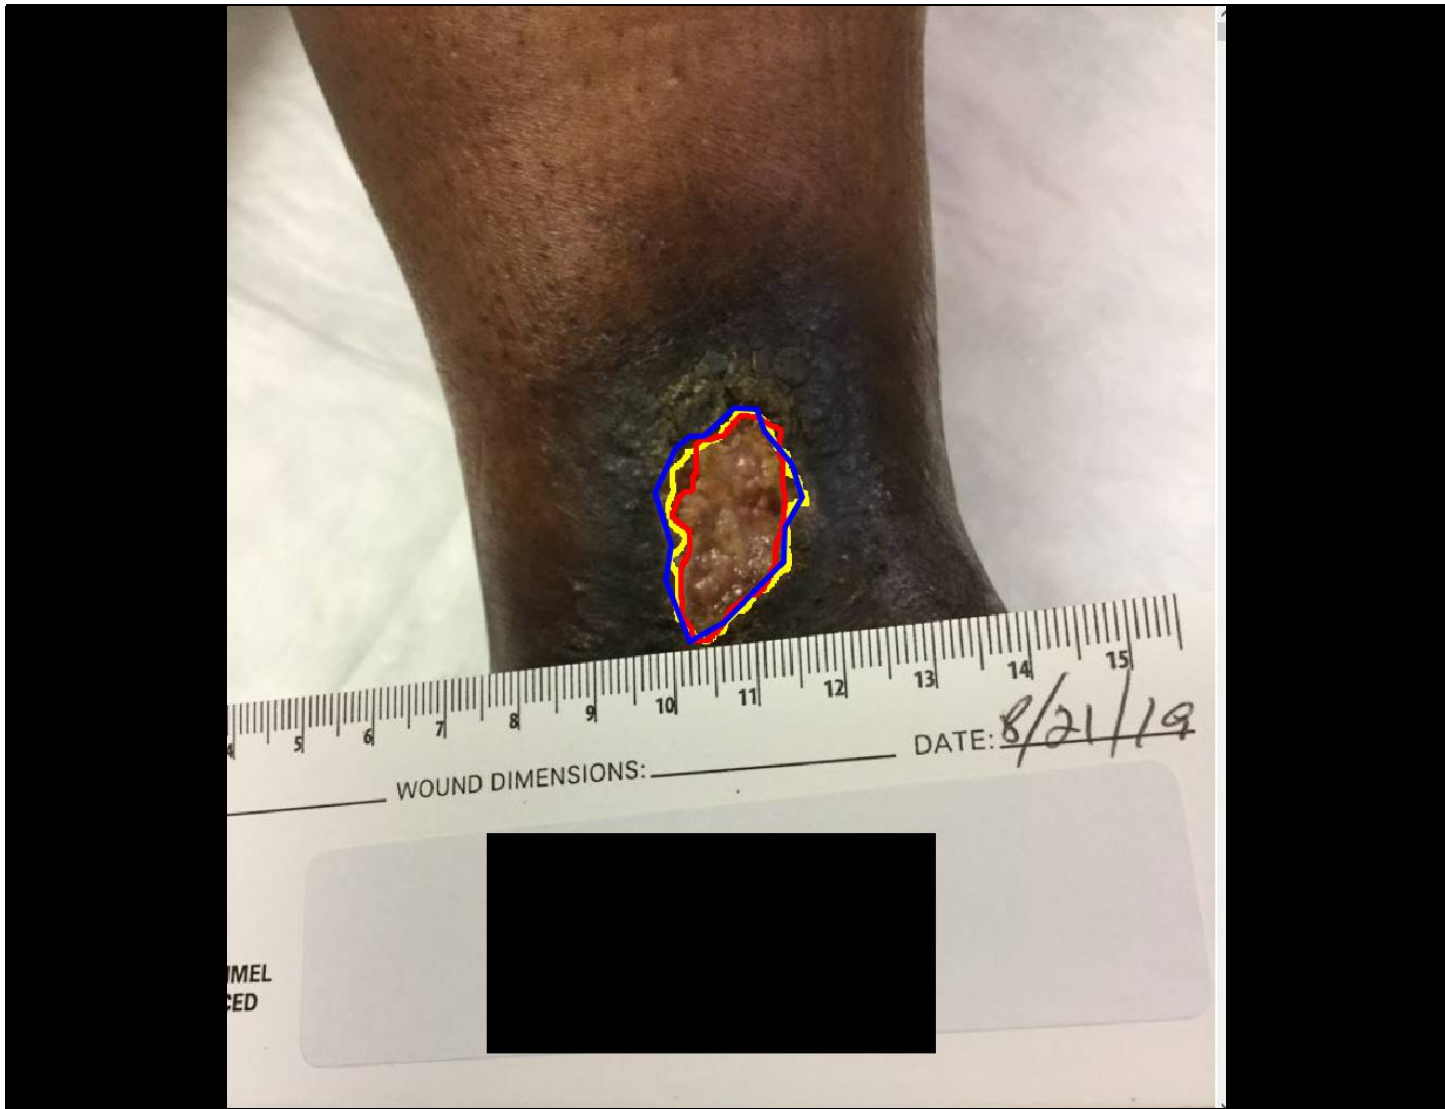

| Tracing Data |                               |                           |                               |
|--------------|-------------------------------|---------------------------|-------------------------------|
| Tracer:      | Wound Area (px <sup>2</sup> ) | Ruler Calibration (px/cm) | Wound Area (cm <sup>2</sup> ) |
| H1           | 17200                         | 76.7                      | 2.92                          |
| H2           | 14570                         | 79.1                      | 2.33                          |
| AI           | 18592                         | 80.1                      | 2.90                          |

| Tracing Comparisons     |                     |                     |                     |                     |
|-------------------------|---------------------|---------------------|---------------------|---------------------|
| Difference Metric:      | Human-Human         |                     | Human-AI            |                     |
|                         | H1(ref)<br>H2(test) | H2(ref)<br>H1(test) | H1(ref)<br>AI(test) | H2(ref)<br>AI(test) |
| False Negative Area (%) | 16.7                | 1.6                 | 4.1                 | 2.6                 |
| False Positive Area (%) | 1.4                 | 19.7                | 12.2                | 30.2                |
| Relative Error (%)      | 15.3                | 18.1                | 8.1                 | 27.6                |

| Blinded Attending Surgeon Review |              |                      |                      |                      |              |                         |
|----------------------------------|--------------|----------------------|----------------------|----------------------|--------------|-------------------------|
| Reviewer                         | PGT Estimate | H1 meets definition? | H2 meets definition? | AI meets definition? | Which is AI? | Which is most accurate? |
| 1                                | 10           | Yes                  | Yes                  | Yes                  | H1           | H1                      |
| 2                                | 30           | Yes                  | Yes                  | Yes                  | AI           | H1                      |
| 3                                | 0            | Yes                  | No                   | No                   | H1           | H2                      |

| Wound EMR Information |        |     |            |                   |                   |                  |                  |                               |
|-----------------------|--------|-----|------------|-------------------|-------------------|------------------|------------------|-------------------------------|
| Sequential Number     | Gender | Age | Wound Type | Wound Location    | Wound Length (cm) | Wound Width (cm) | Wound Depth (cm) | Wound Area (cm <sup>2</sup> ) |
| 74                    | F      | 78  | Trauma     | Left medial ankle |                   |                  |                  |                               |

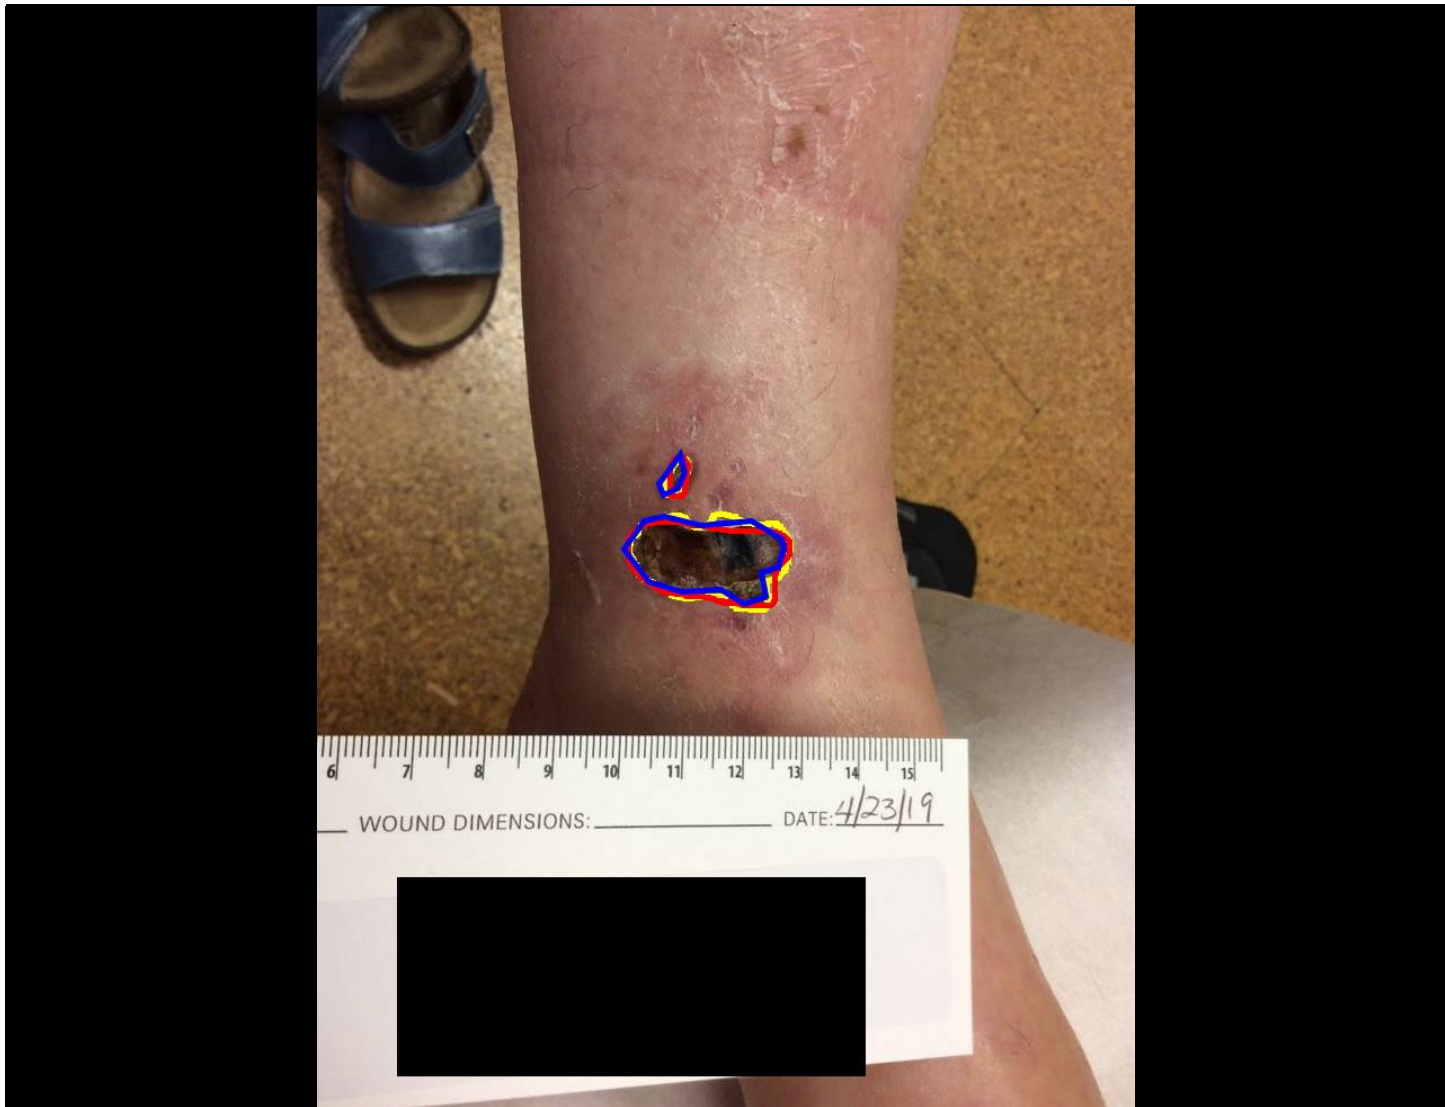

| Tracing Data |                               |                           |                               |
|--------------|-------------------------------|---------------------------|-------------------------------|
| Tracer:      | Wound Area (px <sup>2</sup> ) | Ruler Calibration (px/cm) | Wound Area (cm <sup>2</sup> ) |
| H1           | 9240                          | 53.9                      | 3.18                          |
| H2           | 8590                          | 44.0                      | 4.43                          |
| AI           | 7998                          | 52.5                      | 2.90                          |

| Tracing Comparisons     |                     |                     |                     |                     |
|-------------------------|---------------------|---------------------|---------------------|---------------------|
| Difference Metric:      | Human-Human         |                     | Human-AI            |                     |
|                         | H1(ref)<br>H2(test) | H2(ref)<br>H1(test) | H1(ref)<br>AI(test) | H2(ref)<br>AI(test) |
| False Negative Area (%) | 11.6                | 4.9                 | 15.5                | 13.7                |
| False Positive Area (%) | 4.5                 | 12.4                | 2.1                 | 6.8                 |
| Relative Error (%)      | 7.0                 | 7.6                 | 13.4                | 6.9                 |

| Blinded Attending Surgeon Review |              |                      |                      |                      |              |                         |
|----------------------------------|--------------|----------------------|----------------------|----------------------|--------------|-------------------------|
| Reviewer                         | PGT Estimate | H1 meets definition? | H2 meets definition? | AI meets definition? | Which is AI? | Which is most accurate? |
| 1                                | 0            | Yes                  | Yes                  | Yes                  | H2           | H1                      |
| 2                                | 0            | Yes                  | Yes                  | Yes                  | AI           | AI                      |
| 3                                | 0            | Yes                  | Yes                  | Yes                  | H1           | H2                      |

**Wound EMR Information**

| Sequential Number | Gender | Age | Wound Type | Wound Location | Wound Length (cm) | Wound Width (cm) | Wound Depth (cm) | Wound Area (cm <sup>2</sup> ) |
|-------------------|--------|-----|------------|----------------|-------------------|------------------|------------------|-------------------------------|
| 75                | F      | 42  | Surgical   | Left knee      |                   |                  |                  |                               |

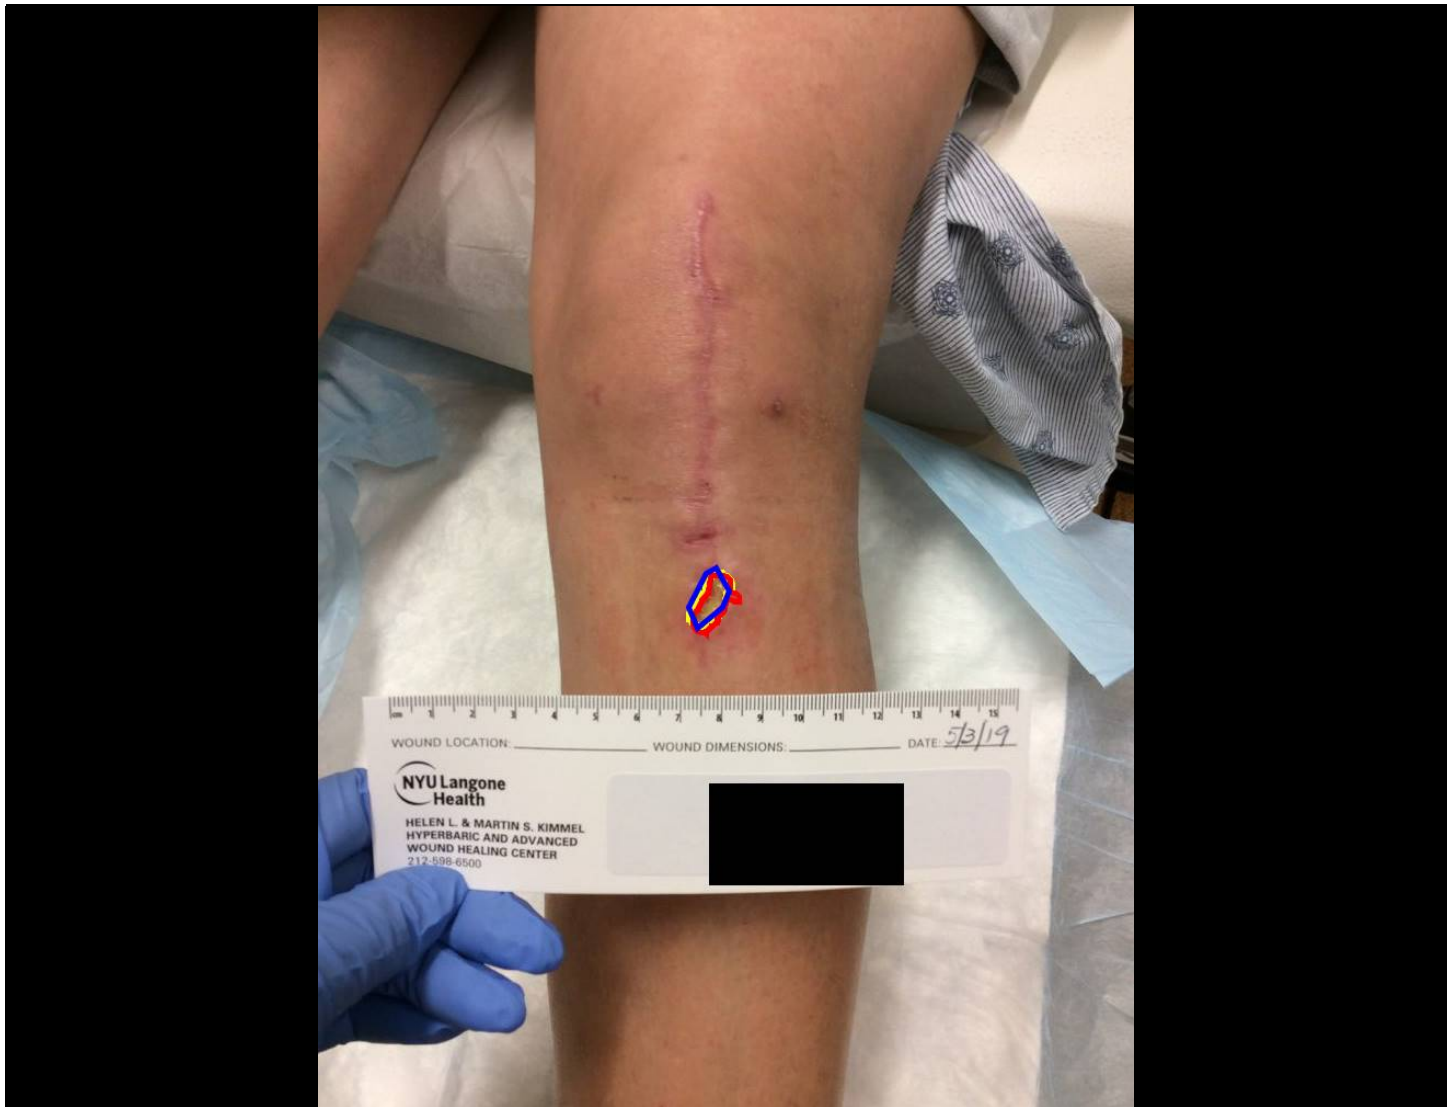

| Tracing Data |                               |                           |                               |
|--------------|-------------------------------|---------------------------|-------------------------------|
| Tracer:      | Wound Area (px <sup>2</sup> ) | Ruler Calibration (px/cm) | Wound Area (cm <sup>2</sup> ) |
| H1           | 1164                          | 37.7                      | 0.82                          |
| H2           | 1100                          | 29.5                      | 1.26                          |
| AI           | 1140                          | 35.6                      | 0.90                          |

| Tracing Comparisons     |                     |                     |                     |                     |
|-------------------------|---------------------|---------------------|---------------------|---------------------|
| Difference Metric:      | Human-Human         |                     | Human-AI            |                     |
|                         | H1(ref)<br>H2(test) | H2(ref)<br>H1(test) | H1(ref)<br>AI(test) | H2(ref)<br>AI(test) |
| False Negative Area (%) | 19.0                | 14.3                | 19.4                | 28.1                |
| False Positive Area (%) | 13.5                | 20.1                | 17.4                | 31.7                |
| Relative Error (%)      | 5.5                 | 5.8                 | 2.1                 | 3.6                 |

| Blinded Attending Surgeon Review |              |                      |                      |                      |              |                         |
|----------------------------------|--------------|----------------------|----------------------|----------------------|--------------|-------------------------|
| Reviewer                         | PGT Estimate | H1 meets definition? | H2 meets definition? | AI meets definition? | Which is AI? | Which is most accurate? |
| 1                                | 10           | No                   | No                   | Yes                  | H2           | H1                      |
| 2                                | 10           | Yes                  | Yes                  | Yes                  | H1           | H2                      |
| 3                                | 10           | No                   | No                   | Yes                  | H1           | AI                      |



| Wound EMR Information |        |     |            |                |                   |                  |                  |                               |
|-----------------------|--------|-----|------------|----------------|-------------------|------------------|------------------|-------------------------------|
| Sequential Number     | Gender | Age | Wound Type | Wound Location | Wound Length (cm) | Wound Width (cm) | Wound Depth (cm) | Wound Area (cm <sup>2</sup> ) |
| 76                    | M      | 58  | Pressure   | Sacral         | 8.0               | 11.0             |                  | 88.00                         |

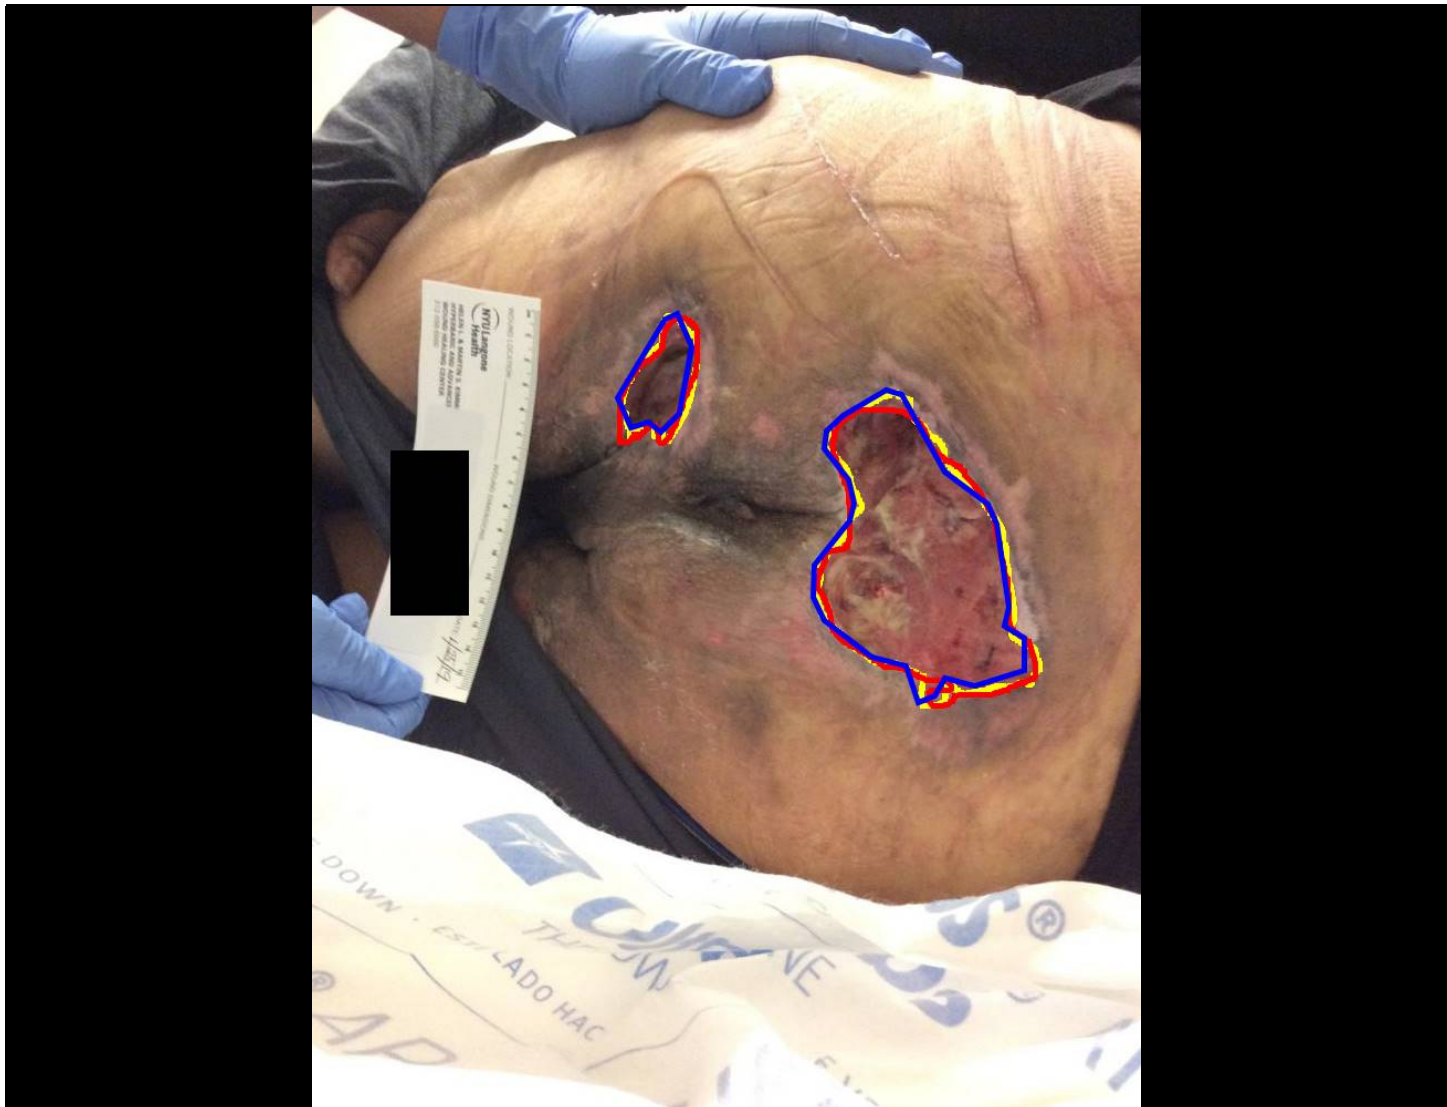

| Tracing Data |                               |                           |                               |
|--------------|-------------------------------|---------------------------|-------------------------------|
| Tracer:      | Wound Area (px <sup>2</sup> ) | Ruler Calibration (px/cm) | Wound Area (cm <sup>2</sup> ) |
| H1           | 38502                         | 22.0                      | 79.32                         |
| H2           | 37745                         | 22.2                      | 76.46                         |
| AI           | 36917                         | 23.5                      | 66.90                         |

| Tracing Comparisons     |                     |                     |                     |                     |
|-------------------------|---------------------|---------------------|---------------------|---------------------|
| Difference Metric:      | Human-Human         |                     | Human-AI            |                     |
|                         | H1(ref)<br>H2(test) | H2(ref)<br>H1(test) | H1(ref)<br>AI(test) | H2(ref)<br>AI(test) |
| False Negative Area (%) | 6.2                 | 4.3                 | 7.3                 | 8.5                 |
| False Positive Area (%) | 4.3                 | 6.3                 | 3.2                 | 6.3                 |
| Relative Error (%)      | 2.0                 | 2.0                 | 4.1                 | 2.2                 |

| Blinded Attending Surgeon Review |              |                      |                      |                      |              |                         |
|----------------------------------|--------------|----------------------|----------------------|----------------------|--------------|-------------------------|
| Reviewer                         | PGT Estimate | H1 meets definition? | H2 meets definition? | AI meets definition? | Which is AI? | Which is most accurate? |
| 1                                | 50           | Yes                  | Yes                  | Yes                  | H1           | H2                      |
| 2                                | 90           | Yes                  | Yes                  | Yes                  | H1           | H1                      |
| 3                                | 70           | Yes                  | Yes                  | Yes                  | H2           | H2                      |

| Wound EMR Information |        |     |            |                |                   |                  |                  |                               |
|-----------------------|--------|-----|------------|----------------|-------------------|------------------|------------------|-------------------------------|
| Sequential Number     | Gender | Age | Wound Type | Wound Location | Wound Length (cm) | Wound Width (cm) | Wound Depth (cm) | Wound Area (cm <sup>2</sup> ) |
| 77                    | F      | 17  | Pressure   | Left ischium   | 3.0               | 2.0              | 7.0              | 6.00                          |

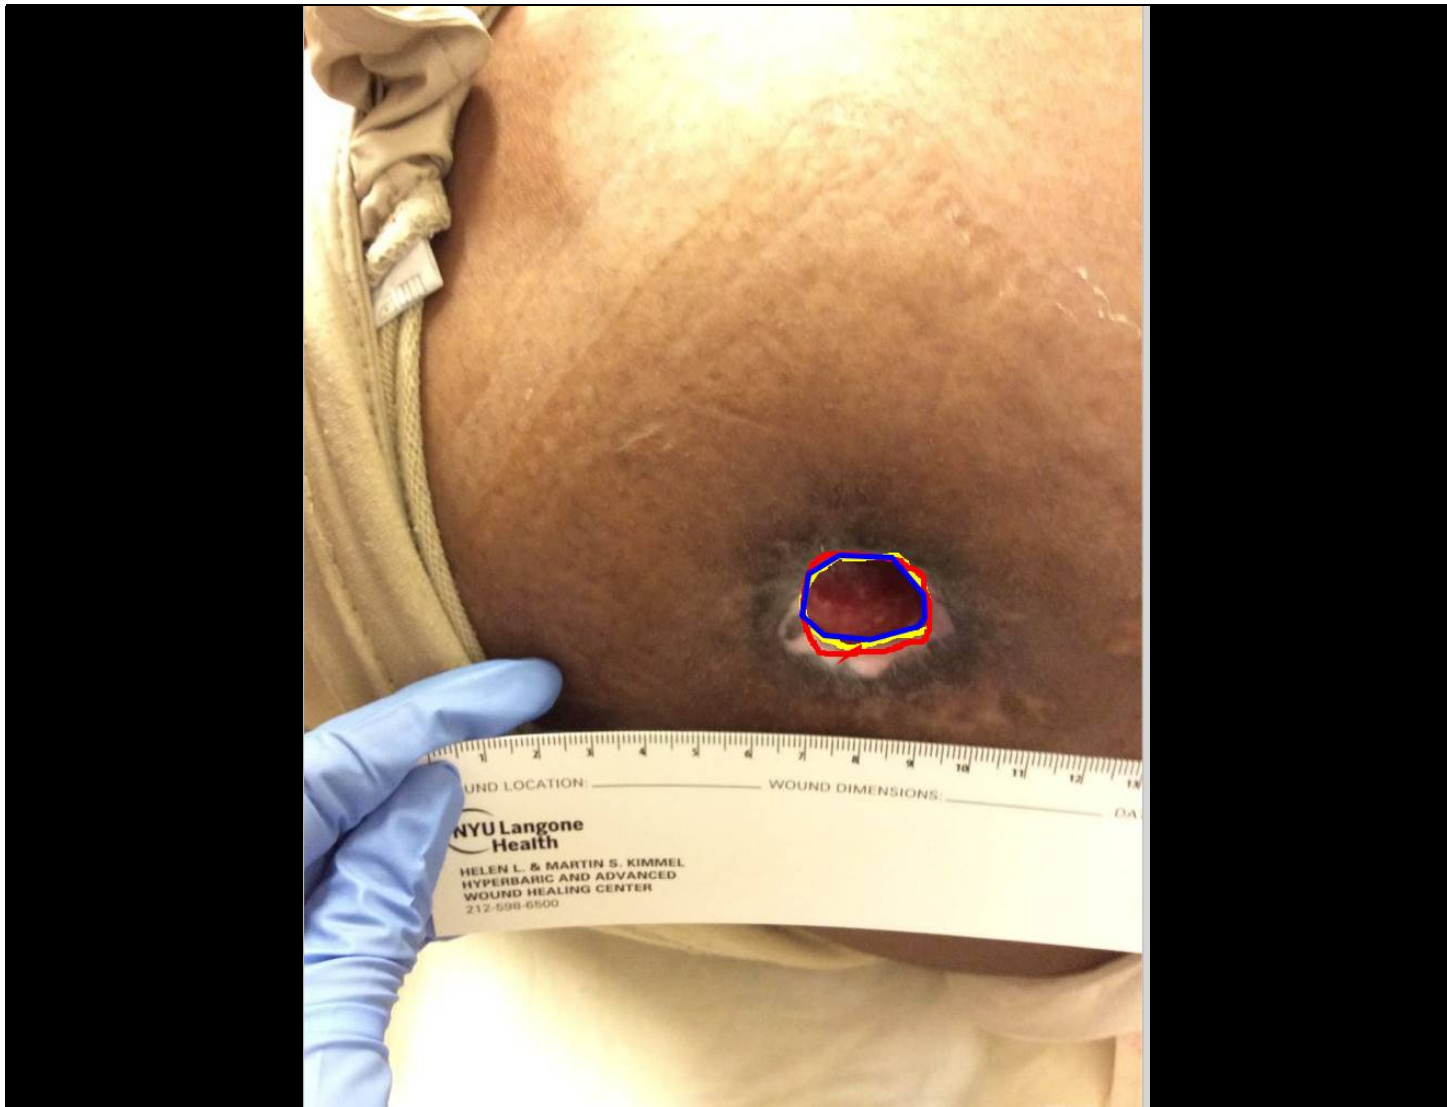

| Tracing Data |                               |                           |                               |
|--------------|-------------------------------|---------------------------|-------------------------------|
| Tracer:      | Wound Area (px <sup>2</sup> ) | Ruler Calibration (px/cm) | Wound Area (cm <sup>2</sup> ) |
| H1           | 7598                          | 48.9                      | 3.18                          |
| H2           | 8966                          | 49.6                      | 3.65                          |
| AI           | 6821                          | 47.7                      | 3.00                          |

| Tracing Comparisons     |                     |                     |                     |                     |
|-------------------------|---------------------|---------------------|---------------------|---------------------|
| Difference Metric:      | Human-Human         |                     | Human-AI            |                     |
|                         | H1(ref)<br>H2(test) | H2(ref)<br>H1(test) | H1(ref)<br>AI(test) | H2(ref)<br>AI(test) |
| False Negative Area (%) | 0.8                 | 15.9                | 11.4                | 24.0                |
| False Positive Area (%) | 18.8                | 0.7                 | 1.1                 | 0.0                 |
| Relative Error (%)      | 18.0                | 15.3                | 10.2                | 23.9                |

| Blinded Attending Surgeon Review |              |                      |                      |                      |              |                         |
|----------------------------------|--------------|----------------------|----------------------|----------------------|--------------|-------------------------|
| Reviewer                         | PGT Estimate | H1 meets definition? | H2 meets definition? | AI meets definition? | Which is AI? | Which is most accurate? |
| 1                                | 100          | Yes                  | Yes                  | Yes                  | H2           | AI                      |
| 2                                | 100          | Yes                  | Yes                  | Yes                  | H2           | AI                      |
| 3                                | 100          | No                   | No                   | Yes                  | AI           | AI                      |

| Wound EMR Information |        |     |            |                  |                   |                  |                  |                               |
|-----------------------|--------|-----|------------|------------------|-------------------|------------------|------------------|-------------------------------|
| Sequential Number     | Gender | Age | Wound Type | Wound Location   | Wound Length (cm) | Wound Width (cm) | Wound Depth (cm) | Wound Area (cm <sup>2</sup> ) |
| 78                    | F      | 52  | Unknown    | Right medial leg | 4.5               | 2.5              |                  | 11.25                         |

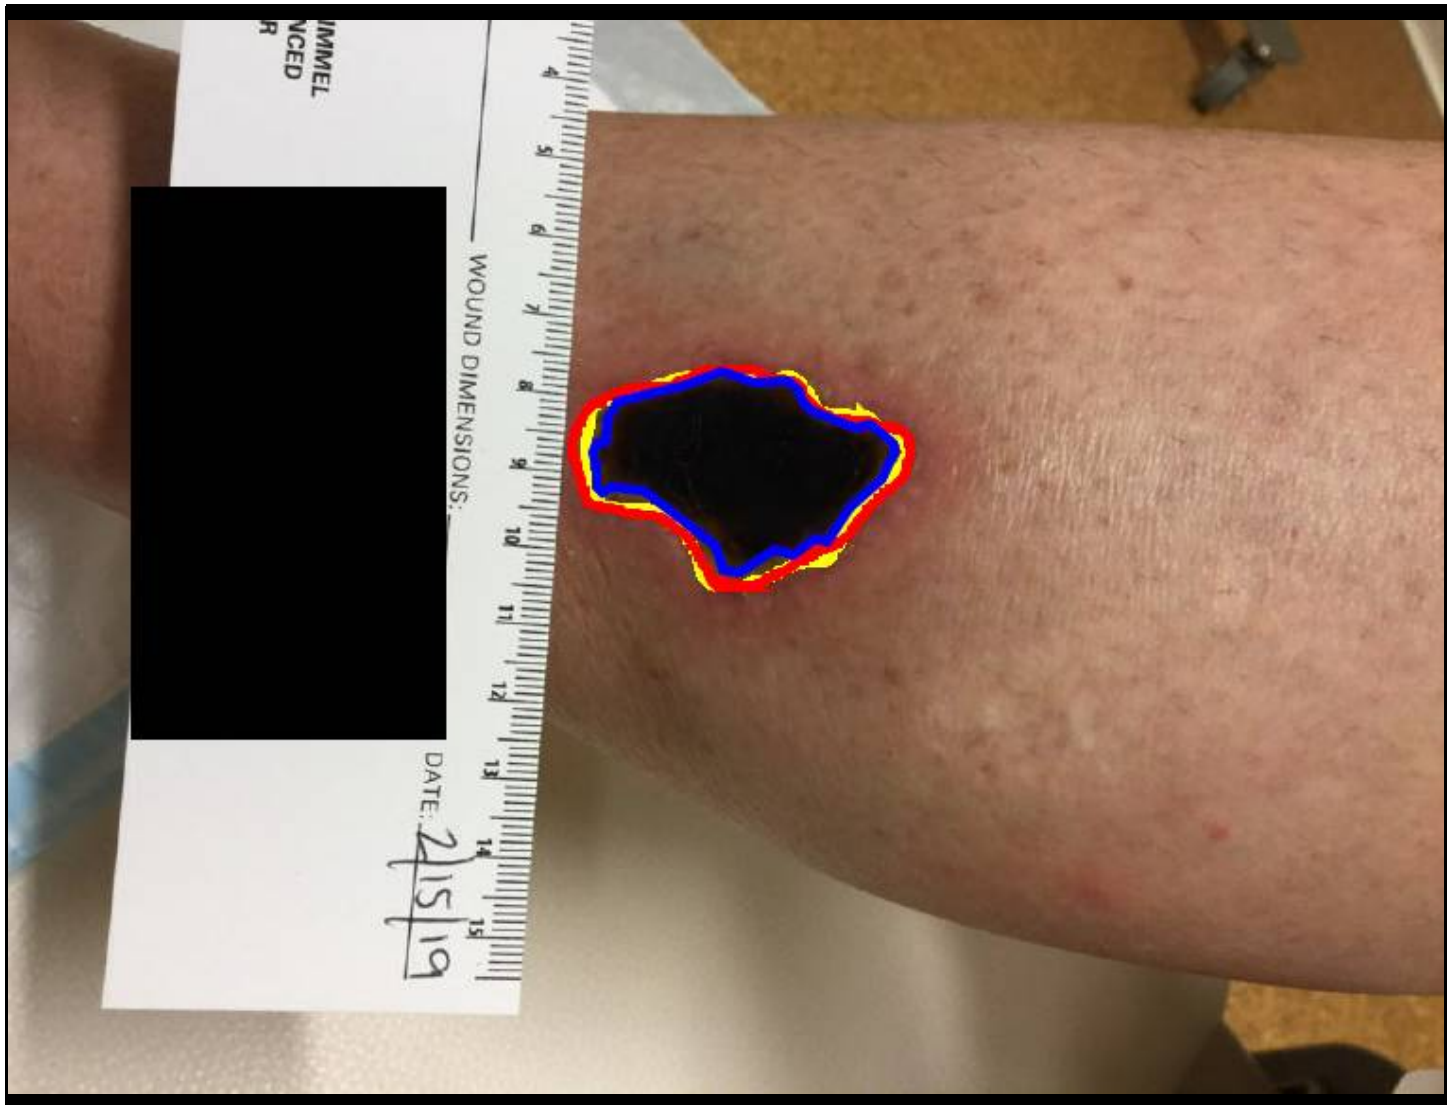

| Tracing Data |                               |                           |                               |
|--------------|-------------------------------|---------------------------|-------------------------------|
| Tracer:      | Wound Area (px <sup>2</sup> ) | Ruler Calibration (px/cm) | Wound Area (cm <sup>2</sup> ) |
| H1           | 12689                         | 40.7                      | 7.67                          |
| H2           | 13195                         | 41.8                      | 7.57                          |
| AI           | 10272                         | 40.7                      | 6.20                          |

| Tracing Comparisons     |                     |                     |                     |                     |
|-------------------------|---------------------|---------------------|---------------------|---------------------|
| Difference Metric:      | Human-Human         |                     | Human-AI            |                     |
|                         | H1(ref)<br>H2(test) | H2(ref)<br>H1(test) | H1(ref)<br>AI(test) | H2(ref)<br>AI(test) |
| False Negative Area (%) | 2.3                 | 6.0                 | 19.0                | 22.2                |
| False Positive Area (%) | 6.2                 | 2.2                 | 0.0                 | 0.0                 |
| Relative Error (%)      | 4.0                 | 3.8                 | 19.0                | 22.2                |

| Blinded Attending Surgeon Review |              |                      |                      |                      |              |                         |
|----------------------------------|--------------|----------------------|----------------------|----------------------|--------------|-------------------------|
| Reviewer                         | PGT Estimate | H1 meets definition? | H2 meets definition? | AI meets definition? | Which is AI? | Which is most accurate? |
| 1                                | 0            | Yes                  | Yes                  | Yes                  | H2           | AI                      |
| 2                                | 100          | Yes                  | Yes                  | Yes                  | AI           | H2                      |
| 3                                | 0            | Yes                  | Yes                  | No                   | H2           | H2                      |

| Wound EMR Information |        |     |            |                |                   |                  |                  |                               |
|-----------------------|--------|-----|------------|----------------|-------------------|------------------|------------------|-------------------------------|
| Sequential Number     | Gender | Age | Wound Type | Wound Location | Wound Length (cm) | Wound Width (cm) | Wound Depth (cm) | Wound Area (cm <sup>2</sup> ) |
| 79                    | F      | 84  | Pressure   | Sacrum         |                   |                  |                  |                               |

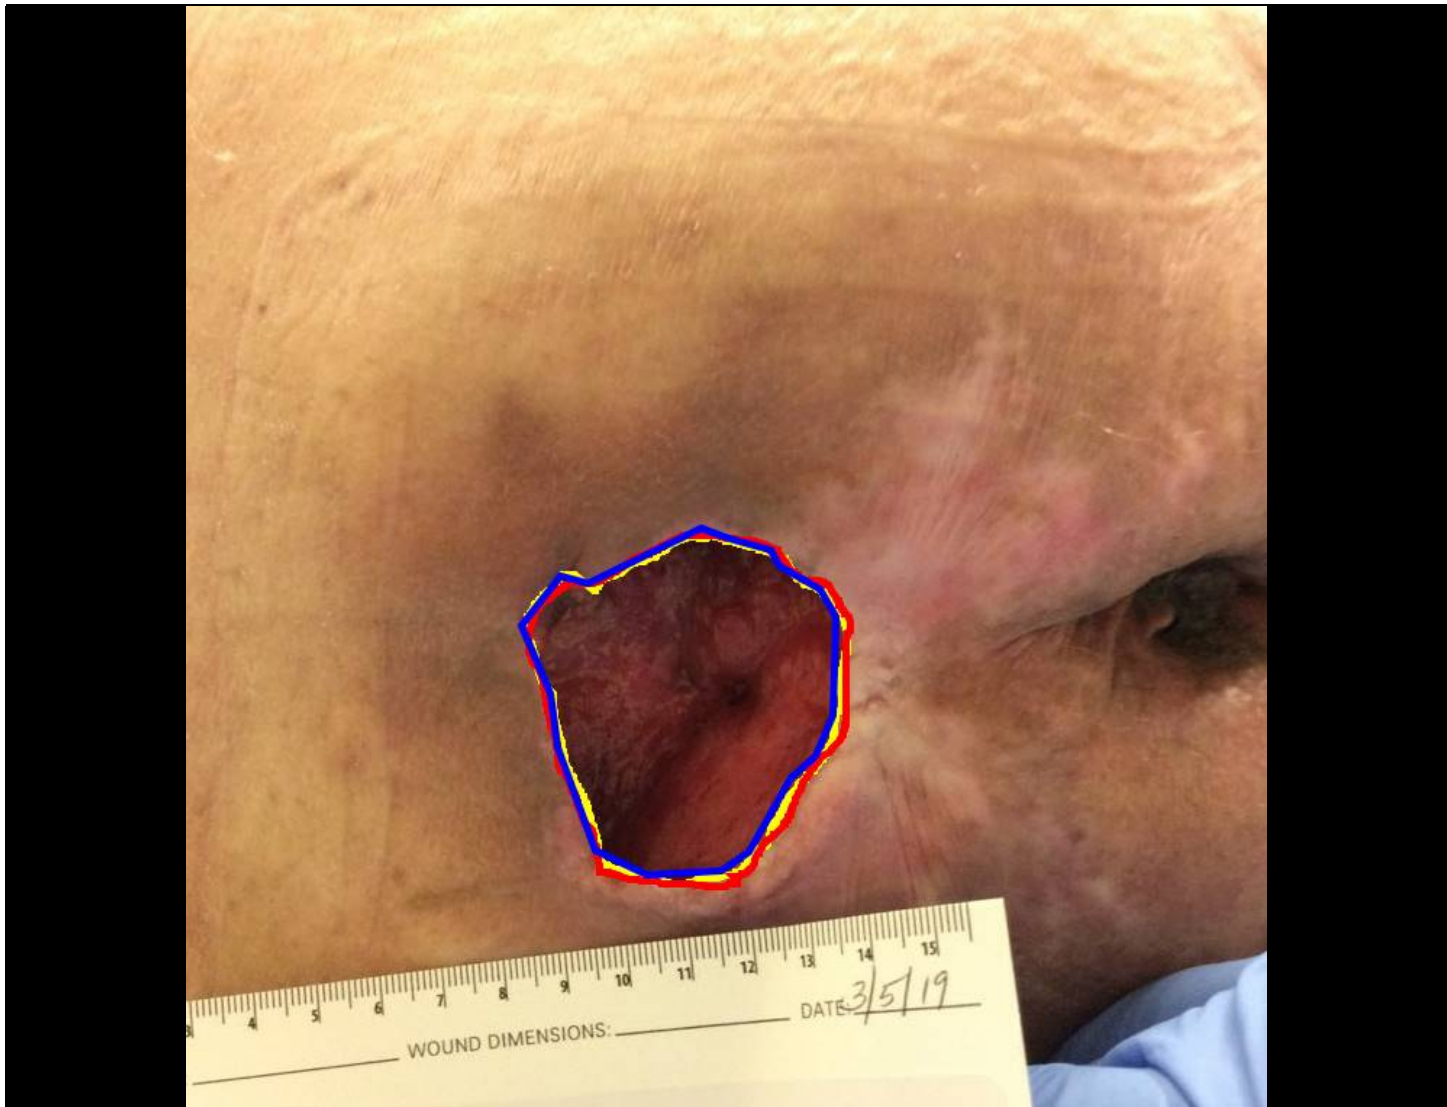

| Tracing Data |                               |                           |                               |
|--------------|-------------------------------|---------------------------|-------------------------------|
| Tracer:      | Wound Area (px <sup>2</sup> ) | Ruler Calibration (px/cm) | Wound Area (cm <sup>2</sup> ) |
| H1           | 38128                         | 42.8                      | 20.79                         |
| H2           | 39791                         | 42.4                      | 22.14                         |
| AI           | 36943                         | 43.0                      | 20.00                         |

| Tracing Comparisons     |                     |                     |                     |                     |
|-------------------------|---------------------|---------------------|---------------------|---------------------|
| Difference Metric:      | Human-Human         |                     | Human-AI            |                     |
|                         | H1(ref)<br>H2(test) | H2(ref)<br>H1(test) | H1(ref)<br>AI(test) | H2(ref)<br>AI(test) |
| False Negative Area (%) | 0.7                 | 4.9                 | 4.6                 | 7.8                 |
| False Positive Area (%) | 5.1                 | 0.7                 | 1.5                 | 0.7                 |
| Relative Error (%)      | 4.4                 | 4.2                 | 3.1                 | 7.2                 |

| Blinded Attending Surgeon Review |              |                      |                      |                      |              |                         |
|----------------------------------|--------------|----------------------|----------------------|----------------------|--------------|-------------------------|
| Reviewer                         | PGT Estimate | H1 meets definition? | H2 meets definition? | AI meets definition? | Which is AI? | Which is most accurate? |
| 1                                | 90           | Yes                  | Yes                  | Yes                  | H2           | H2                      |
| 2                                | 100          | Yes                  | Yes                  | Yes                  | H1           | H1                      |
| 3                                | 100          | Yes                  | Yes                  | Yes                  | H2           | H2                      |

| Wound EMR Information |        |     |            |                |                   |                  |                  |                               |
|-----------------------|--------|-----|------------|----------------|-------------------|------------------|------------------|-------------------------------|
| Sequential Number     | Gender | Age | Wound Type | Wound Location | Wound Length (cm) | Wound Width (cm) | Wound Depth (cm) | Wound Area (cm <sup>2</sup> ) |
| 80                    | M      | 19  | Pressure   | Sacrum         | 6.0               | 2.5              | 1.5              | 15.00                         |

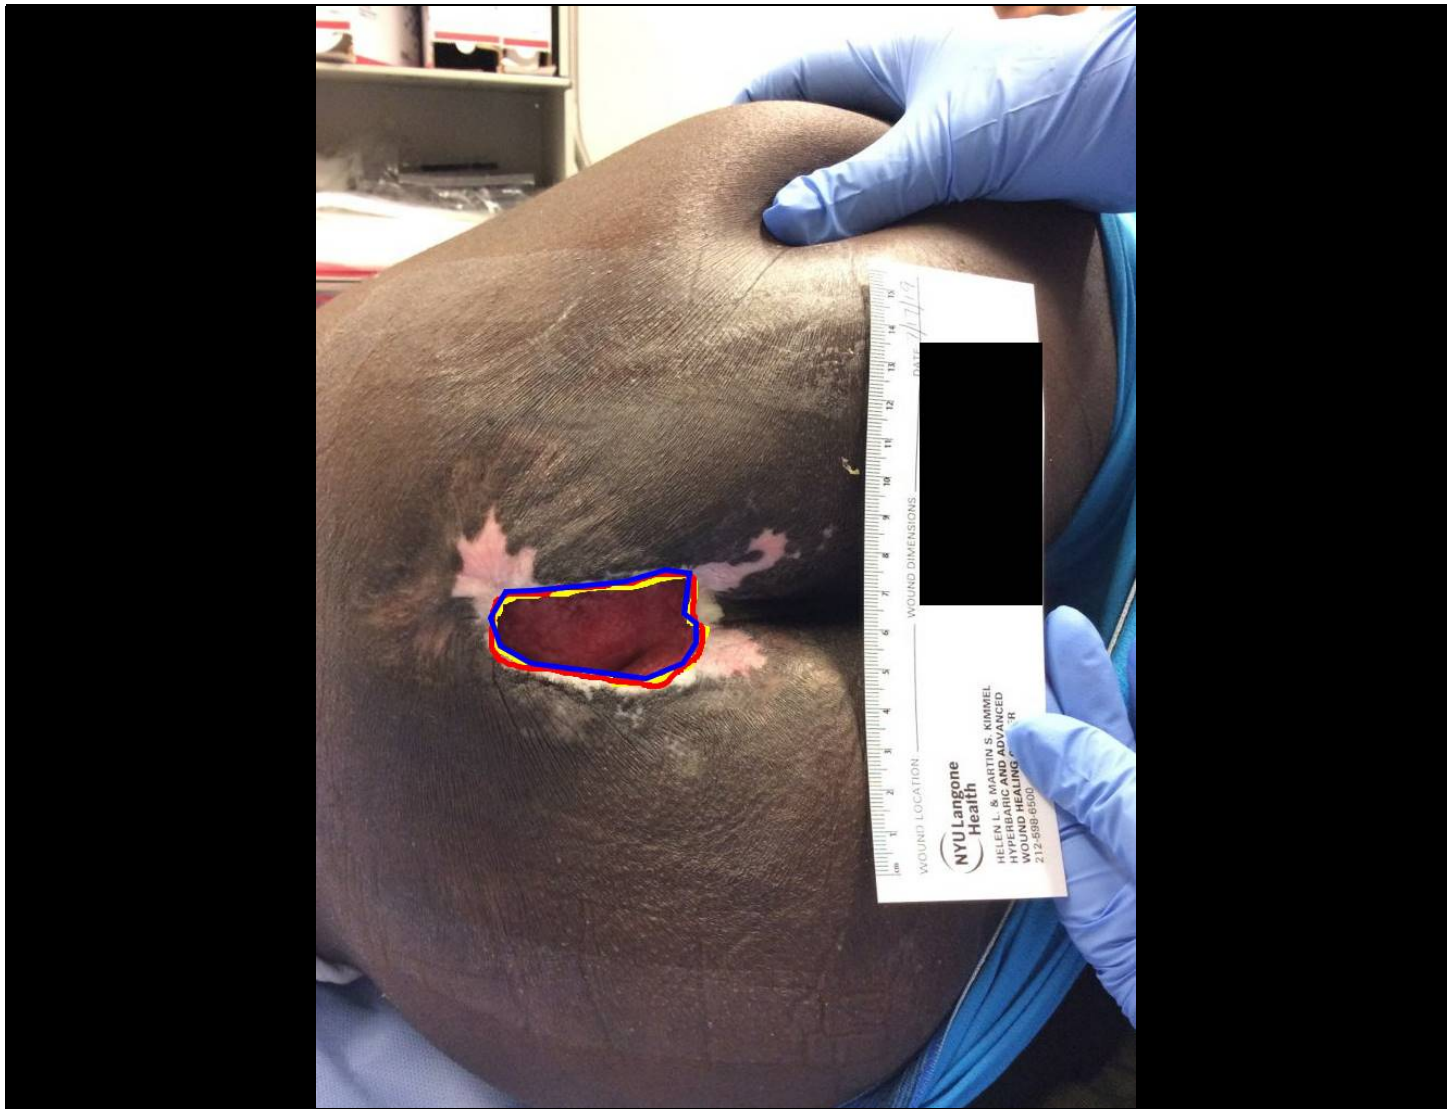

| Tracing Data |                               |                           |                               |
|--------------|-------------------------------|---------------------------|-------------------------------|
| Tracer:      | Wound Area (px <sup>2</sup> ) | Ruler Calibration (px/cm) | Wound Area (cm <sup>2</sup> ) |
| H1           | 14111                         | 35.5                      | 11.20                         |
| H2           | 15242                         | 36.5                      | 11.44                         |
| AI           | 13800                         | 36.3                      | 10.50                         |

| Tracing Comparisons     |                     |                     |                     |                     |
|-------------------------|---------------------|---------------------|---------------------|---------------------|
| Difference Metric:      | Human-Human         |                     | Human-AI            |                     |
|                         | H1(ref)<br>H2(test) | H2(ref)<br>H1(test) | H1(ref)<br>AI(test) | H2(ref)<br>AI(test) |
| False Negative Area (%) | 0.8                 | 8.2                 | 8.4                 | 11.3                |
| False Positive Area (%) | 8.8                 | 0.7                 | 6.2                 | 1.8                 |
| Relative Error (%)      | 8.0                 | 7.4                 | 2.2                 | 9.5                 |

| Blinded Attending Surgeon Review |              |                      |                      |                      |              |                         |
|----------------------------------|--------------|----------------------|----------------------|----------------------|--------------|-------------------------|
| Reviewer                         | PGT Estimate | H1 meets definition? | H2 meets definition? | AI meets definition? | Which is AI? | Which is most accurate? |
| 1                                | 100          | Yes                  | Yes                  | Yes                  | H1           | H1                      |
| 2                                | 100          | Yes                  | Yes                  | Yes                  | AI           | H2                      |
| 3                                | 100          | Yes                  | Yes                  | No                   | H1           | H2                      |

| Wound EMR Information |        |     |            |                    |                   |                  |                  |                               |
|-----------------------|--------|-----|------------|--------------------|-------------------|------------------|------------------|-------------------------------|
| Sequential Number     | Gender | Age | Wound Type | Wound Location     | Wound Length (cm) | Wound Width (cm) | Wound Depth (cm) | Wound Area (cm <sup>2</sup> ) |
| 81                    | F      | 69  | Surgical   | Left lateral ankle |                   |                  |                  |                               |

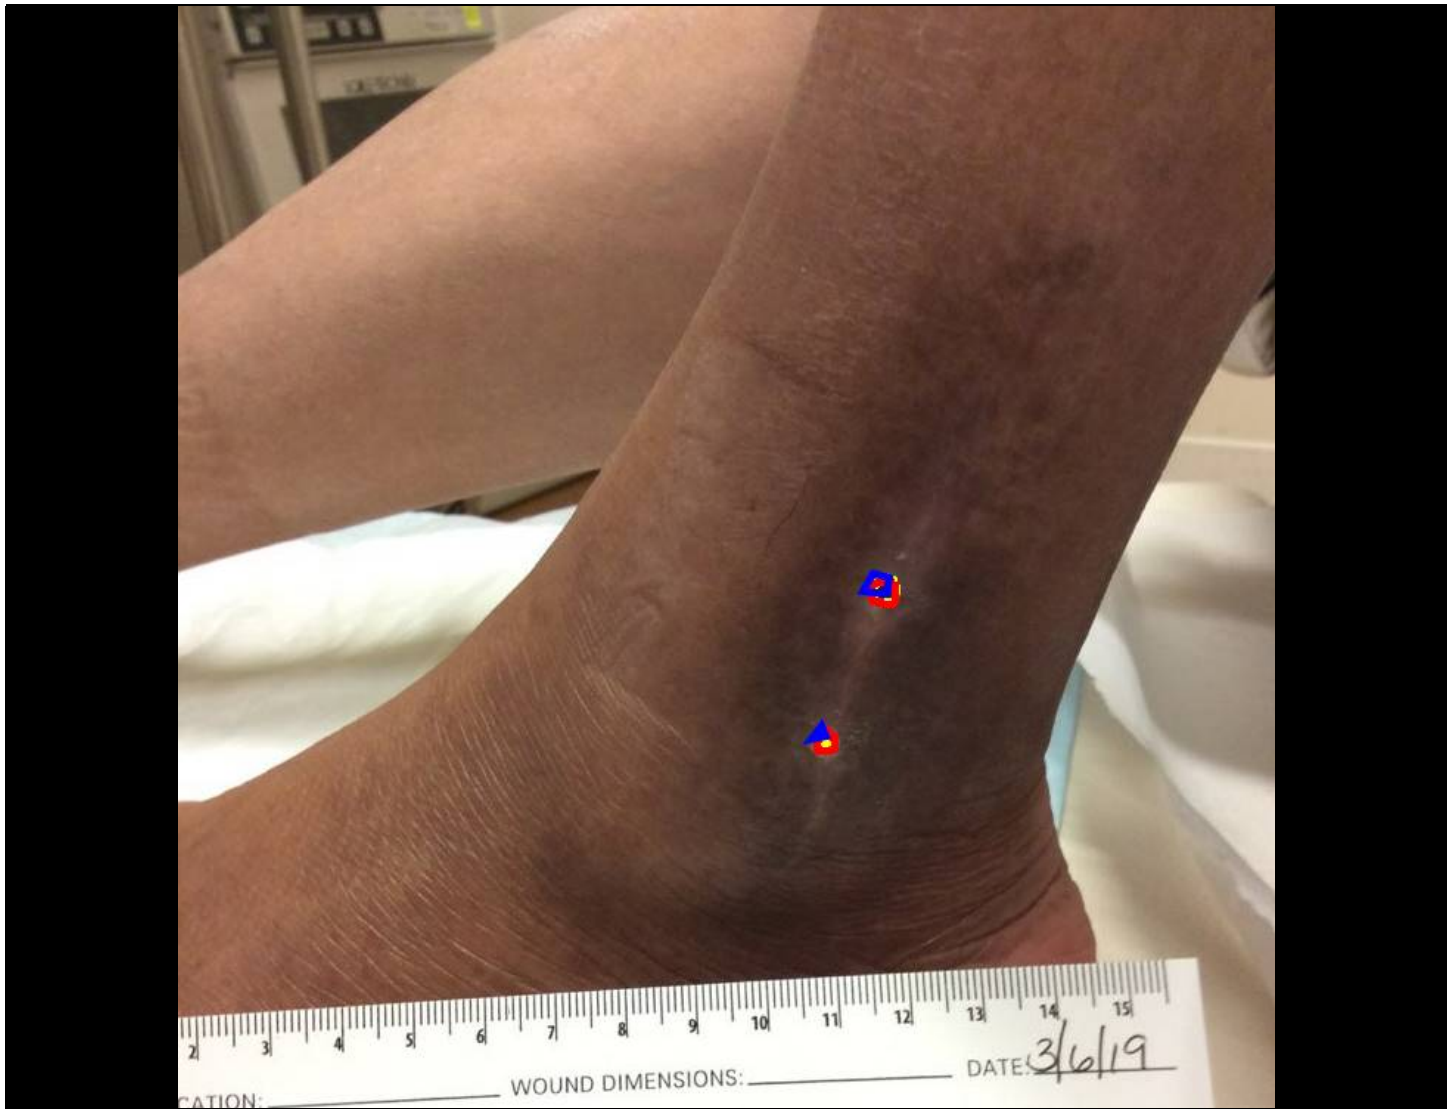

| Tracing Data |                               |                           |                               |
|--------------|-------------------------------|---------------------------|-------------------------------|
| Tracer:      | Wound Area (px <sup>2</sup> ) | Ruler Calibration (px/cm) | Wound Area (cm <sup>2</sup> ) |
| H1           | 276                           | 48.4                      | 0.12                          |
| H2           | 352                           | 52.0                      | 0.13                          |
| AI           | 194                           | 44.0                      | 0.10                          |

| Tracing Comparisons     |                     |                     |                     |                     |
|-------------------------|---------------------|---------------------|---------------------|---------------------|
| Difference Metric:      | Human-Human         |                     | Human-AI            |                     |
|                         | H1(ref)<br>H2(test) | H2(ref)<br>H1(test) | H1(ref)<br>AI(test) | H2(ref)<br>AI(test) |
| False Negative Area (%) | 11.2                | 30.4                | 62.3                | 72.4                |
| False Positive Area (%) | 38.8                | 8.8                 | 32.6                | 27.6                |
| Relative Error (%)      | 27.5                | 21.6                | 29.7                | 44.9                |

| Blinded Attending Surgeon Review |              |                      |                      |                      |              |                         |
|----------------------------------|--------------|----------------------|----------------------|----------------------|--------------|-------------------------|
| Reviewer                         | PGT Estimate | H1 meets definition? | H2 meets definition? | AI meets definition? | Which is AI? | Which is most accurate? |
| 1                                | 0            | Yes                  | Yes                  | Yes                  | H1           | AI                      |
| 2                                | 100          | Yes                  | Yes                  | Yes                  | H2           | H2                      |
| 3                                | 100          | Yes                  | Yes                  | No                   | H1           | H2                      |

| Wound EMR Information |        |     |            |                |                   |                  |                  |                               |
|-----------------------|--------|-----|------------|----------------|-------------------|------------------|------------------|-------------------------------|
| Sequential Number     | Gender | Age | Wound Type | Wound Location | Wound Length (cm) | Wound Width (cm) | Wound Depth (cm) | Wound Area (cm <sup>2</sup> ) |
| 82                    | M      | 35  | Surgical   | Abdomen        | 0.5               | 0.3              |                  | 0.15                          |

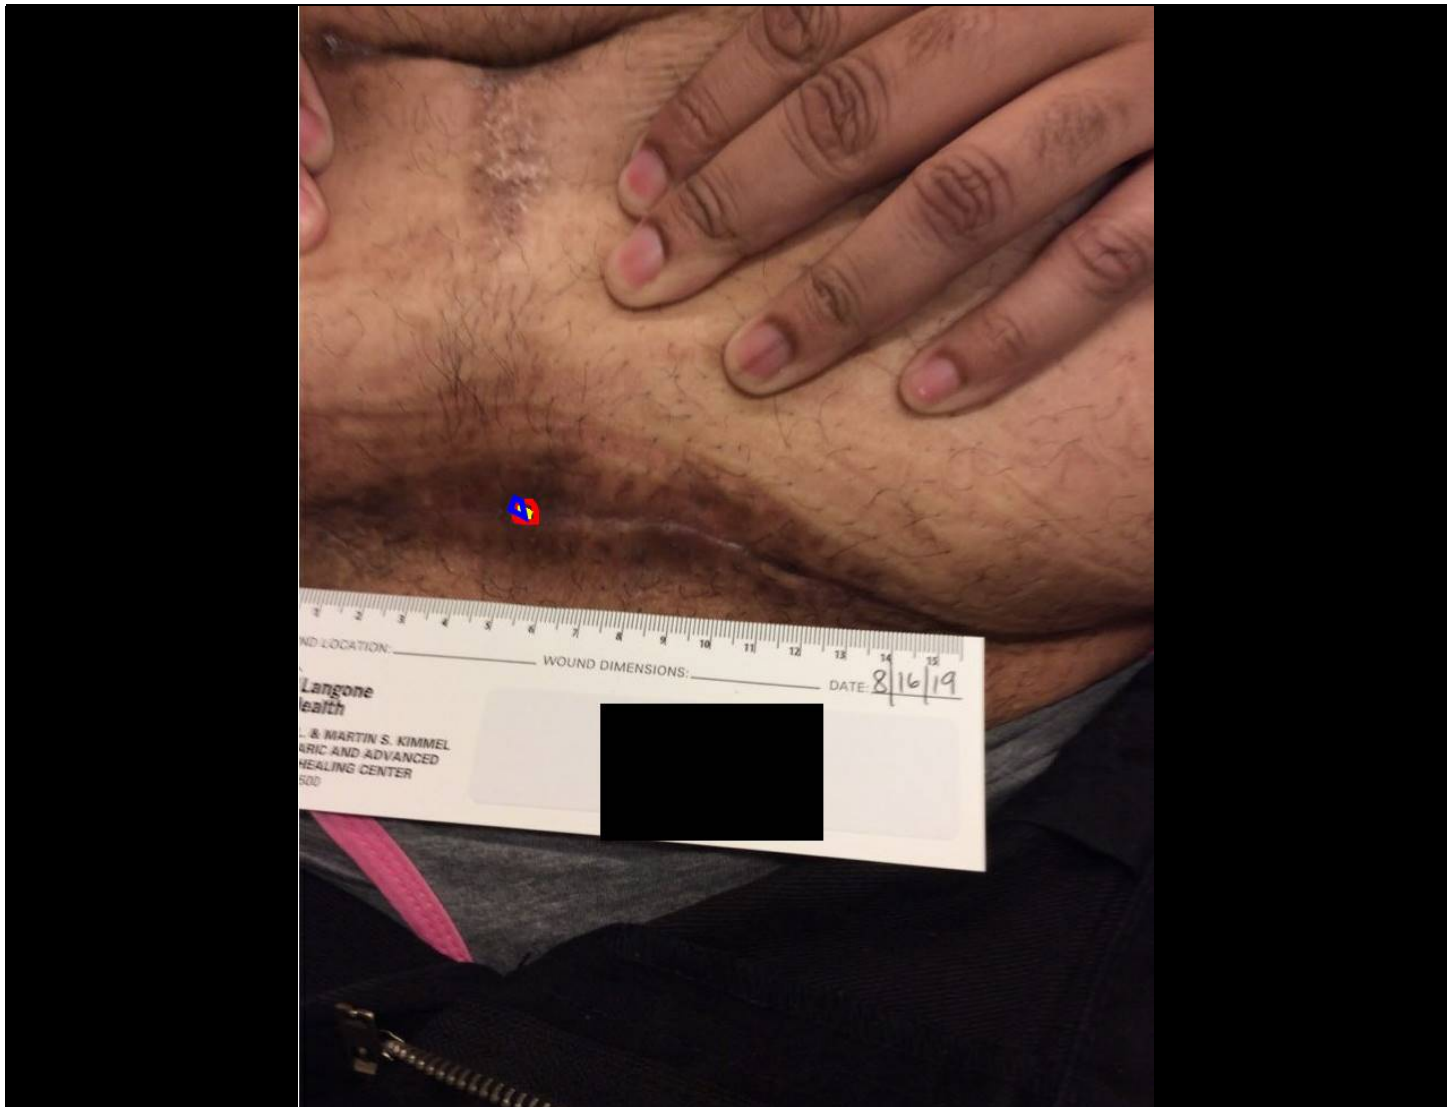

| Tracing Data |                               |                           |                               |
|--------------|-------------------------------|---------------------------|-------------------------------|
| Tracer:      | Wound Area (px <sup>2</sup> ) | Ruler Calibration (px/cm) | Wound Area (cm <sup>2</sup> ) |
| H1           | 70                            | 38.2                      | 0.05                          |
| H2           | 302                           | 39.3                      | 0.20                          |
| AI           | 122                           | 34.9                      | 0.10                          |

| Tracing Comparisons     |                     |                     |                     |                     |
|-------------------------|---------------------|---------------------|---------------------|---------------------|
| Difference Metric:      | Human-Human         |                     | Human-AI            |                     |
|                         | H1(ref)<br>H2(test) | H2(ref)<br>H1(test) | H1(ref)<br>AI(test) | H2(ref)<br>AI(test) |
| False Negative Area (%) | 0.0                 | 76.8                | 40.0                | 71.9                |
| False Positive Area (%) | 331.4               | 0.0                 | 114.3               | 12.3                |
| Relative Error (%)      | 331.4               | 76.8                | 74.3                | 59.6                |

| Blinded Attending Surgeon Review |              |                      |                      |                      |              |                         |
|----------------------------------|--------------|----------------------|----------------------|----------------------|--------------|-------------------------|
| Reviewer                         | PGT Estimate | H1 meets definition? | H2 meets definition? | AI meets definition? | Which is AI? | Which is most accurate? |
| 1                                | 100          | Yes                  | Yes                  | Yes                  | H1           | H2                      |
| 2                                | 100          | Yes                  | Yes                  | Yes                  | H2           | AI                      |
| 3                                | 100          | Yes                  | No                   | No                   | AI           | H2                      |

| Wound EMR Information |        |     |            |                |                   |                  |                  |                               |
|-----------------------|--------|-----|------------|----------------|-------------------|------------------|------------------|-------------------------------|
| Sequential Number     | Gender | Age | Wound Type | Wound Location | Wound Length (cm) | Wound Width (cm) | Wound Depth (cm) | Wound Area (cm <sup>2</sup> ) |
| 83                    | M      | 56  | Pressure   | Right ischium  | 3.0               |                  | 8.0              |                               |

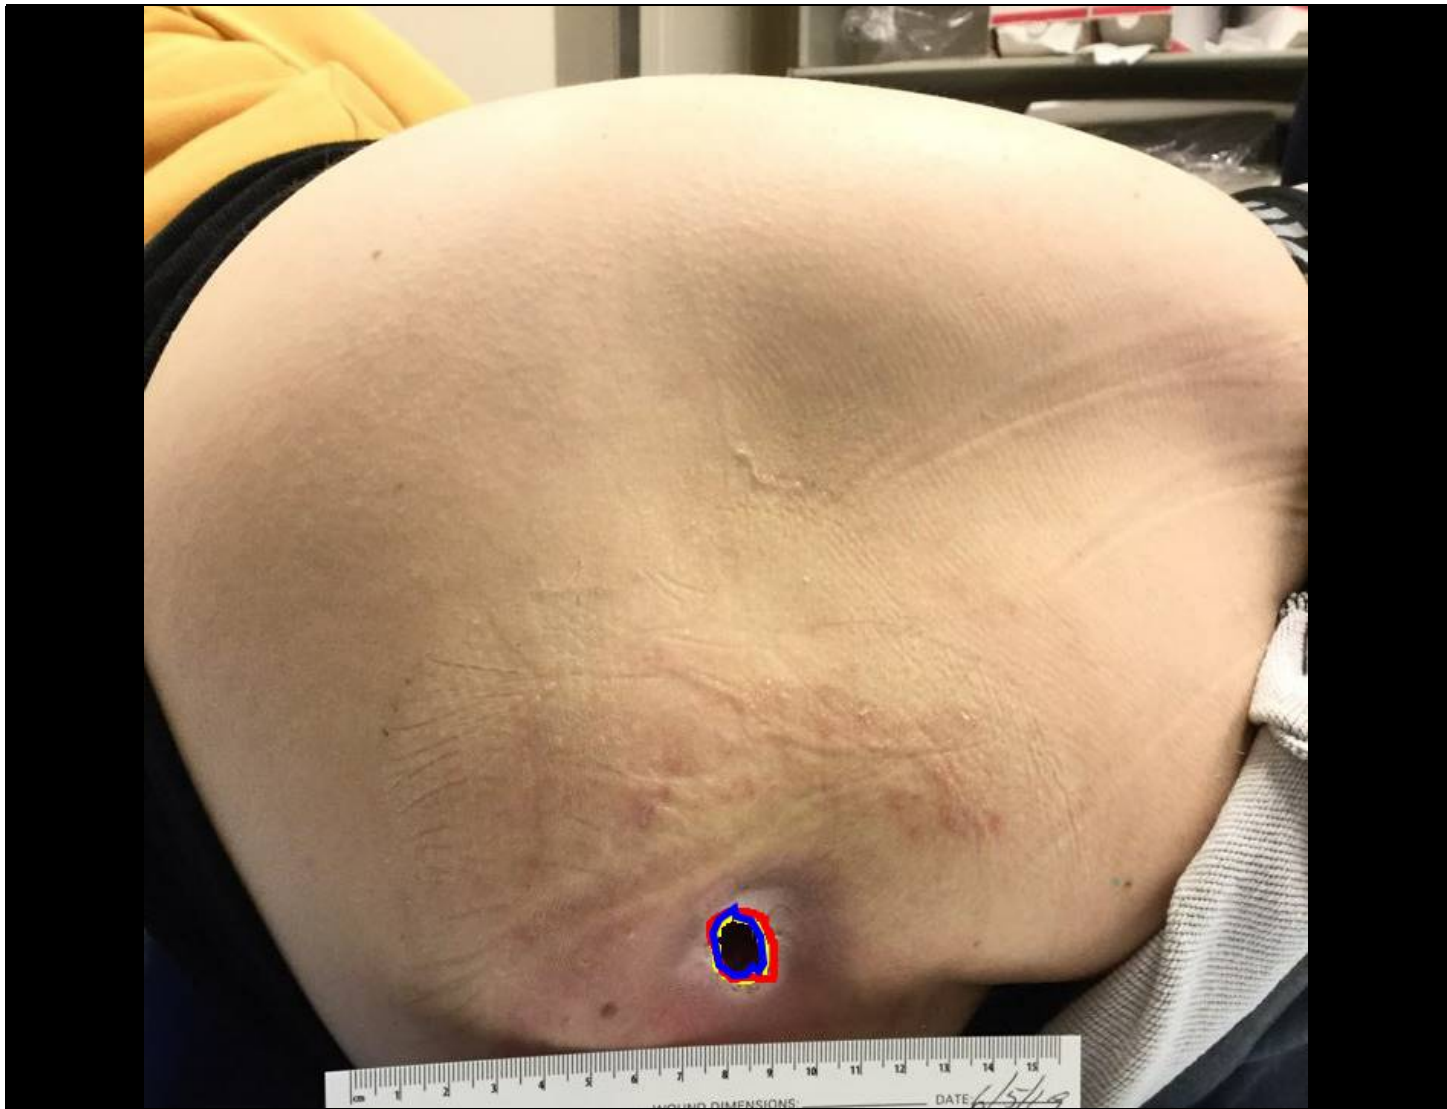

| Tracing Data |                               |                           |                               |
|--------------|-------------------------------|---------------------------|-------------------------------|
| Tracer:      | Wound Area (px <sup>2</sup> ) | Ruler Calibration (px/cm) | Wound Area (cm <sup>2</sup> ) |
| H1           | 1128                          | 29.6                      | 1.29                          |
| H2           | 1511                          | 29.0                      | 1.80                          |
| AI           | 1036                          | 29.4                      | 1.20                          |

| Tracing Comparisons     |                     |                     |                     |                     |
|-------------------------|---------------------|---------------------|---------------------|---------------------|
| Difference Metric:      | Human-Human         |                     | Human-AI            |                     |
|                         | H1(ref)<br>H2(test) | H2(ref)<br>H1(test) | H1(ref)<br>AI(test) | H2(ref)<br>AI(test) |
| False Negative Area (%) | 2.7                 | 27.4                | 12.1                | 31.7                |
| False Positive Area (%) | 36.7                | 2.1                 | 3.9                 | 0.3                 |
| Relative Error (%)      | 34.0                | 25.3                | 8.2                 | 31.4                |

| Blinded Attending Surgeon Review |              |                      |                      |                      |              |                         |
|----------------------------------|--------------|----------------------|----------------------|----------------------|--------------|-------------------------|
| Reviewer                         | PGT Estimate | H1 meets definition? | H2 meets definition? | AI meets definition? | Which is AI? | Which is most accurate? |
| 1                                | 0            | Yes                  | Yes                  | Yes                  | H1           | H2                      |
| 2                                | 50           | Yes                  | Yes                  | Yes                  | H2           | AI                      |
| 3                                | 100          | Yes                  | No                   | Yes                  | H2           | AI                      |



| Wound EMR Information |        |     |            |                |                   |                  |                  |                               |
|-----------------------|--------|-----|------------|----------------|-------------------|------------------|------------------|-------------------------------|
| Sequential Number     | Gender | Age | Wound Type | Wound Location | Wound Length (cm) | Wound Width (cm) | Wound Depth (cm) | Wound Area (cm <sup>2</sup> ) |
| 84                    | F      | 50  | Surgical   | Lower abdomen  | 4.0               | 6.0              |                  | 24.00                         |

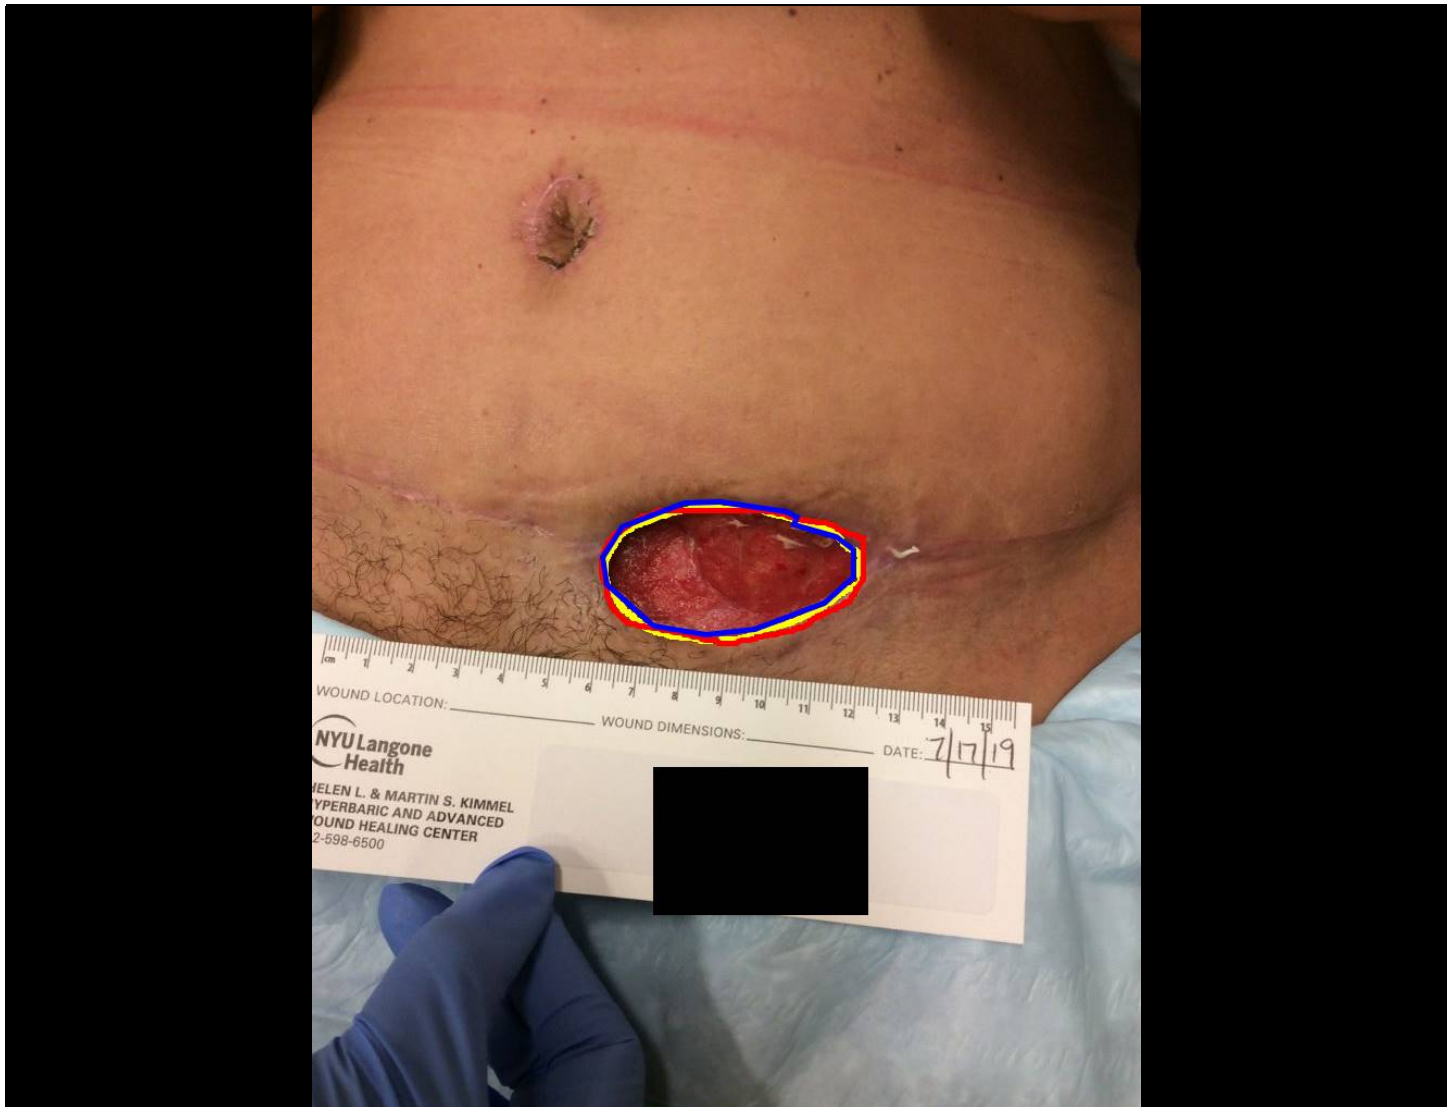

| Tracing Data |                               |                           |                               |
|--------------|-------------------------------|---------------------------|-------------------------------|
| Tracer:      | Wound Area (px <sup>2</sup> ) | Ruler Calibration (px/cm) | Wound Area (cm <sup>2</sup> ) |
| H1           | 21793                         | 40.3                      | 13.40                         |
| H2           | 23594                         | 40.6                      | 14.34                         |
| AI           | 20863                         | 41.2                      | 12.30                         |

| Tracing Comparisons     |                     |                     |                     |                     |
|-------------------------|---------------------|---------------------|---------------------|---------------------|
| Difference Metric:      | Human-Human         |                     | Human-AI            |                     |
|                         | H1(ref)<br>H2(test) | H2(ref)<br>H1(test) | H1(ref)<br>AI(test) | H2(ref)<br>AI(test) |
| False Negative Area (%) | 1.7                 | 9.2                 | 7.2                 | 13.8                |
| False Positive Area (%) | 9.9                 | 1.5                 | 3.0                 | 2.3                 |
| Relative Error (%)      | 8.3                 | 7.6                 | 4.3                 | 11.6                |

| Blinded Attending Surgeon Review |              |                      |                      |                      |              |                         |
|----------------------------------|--------------|----------------------|----------------------|----------------------|--------------|-------------------------|
| Reviewer                         | PGT Estimate | H1 meets definition? | H2 meets definition? | AI meets definition? | Which is AI? | Which is most accurate? |
| 1                                | 100          | Yes                  | Yes                  | Yes                  | H2           | H2                      |
| 2                                | 100          | Yes                  | Yes                  | Yes                  | H2           | H1                      |
| 3                                | 100          | Yes                  | Yes                  | Yes                  | H1           | H2                      |

| Wound EMR Information |        |     |            |                 |                   |                  |                  |                               |
|-----------------------|--------|-----|------------|-----------------|-------------------|------------------|------------------|-------------------------------|
| Sequential Number     | Gender | Age | Wound Type | Wound Location  | Wound Length (cm) | Wound Width (cm) | Wound Depth (cm) | Wound Area (cm <sup>2</sup> ) |
| 86                    | F      | 36  | Surgical   | Left lower back |                   |                  |                  |                               |

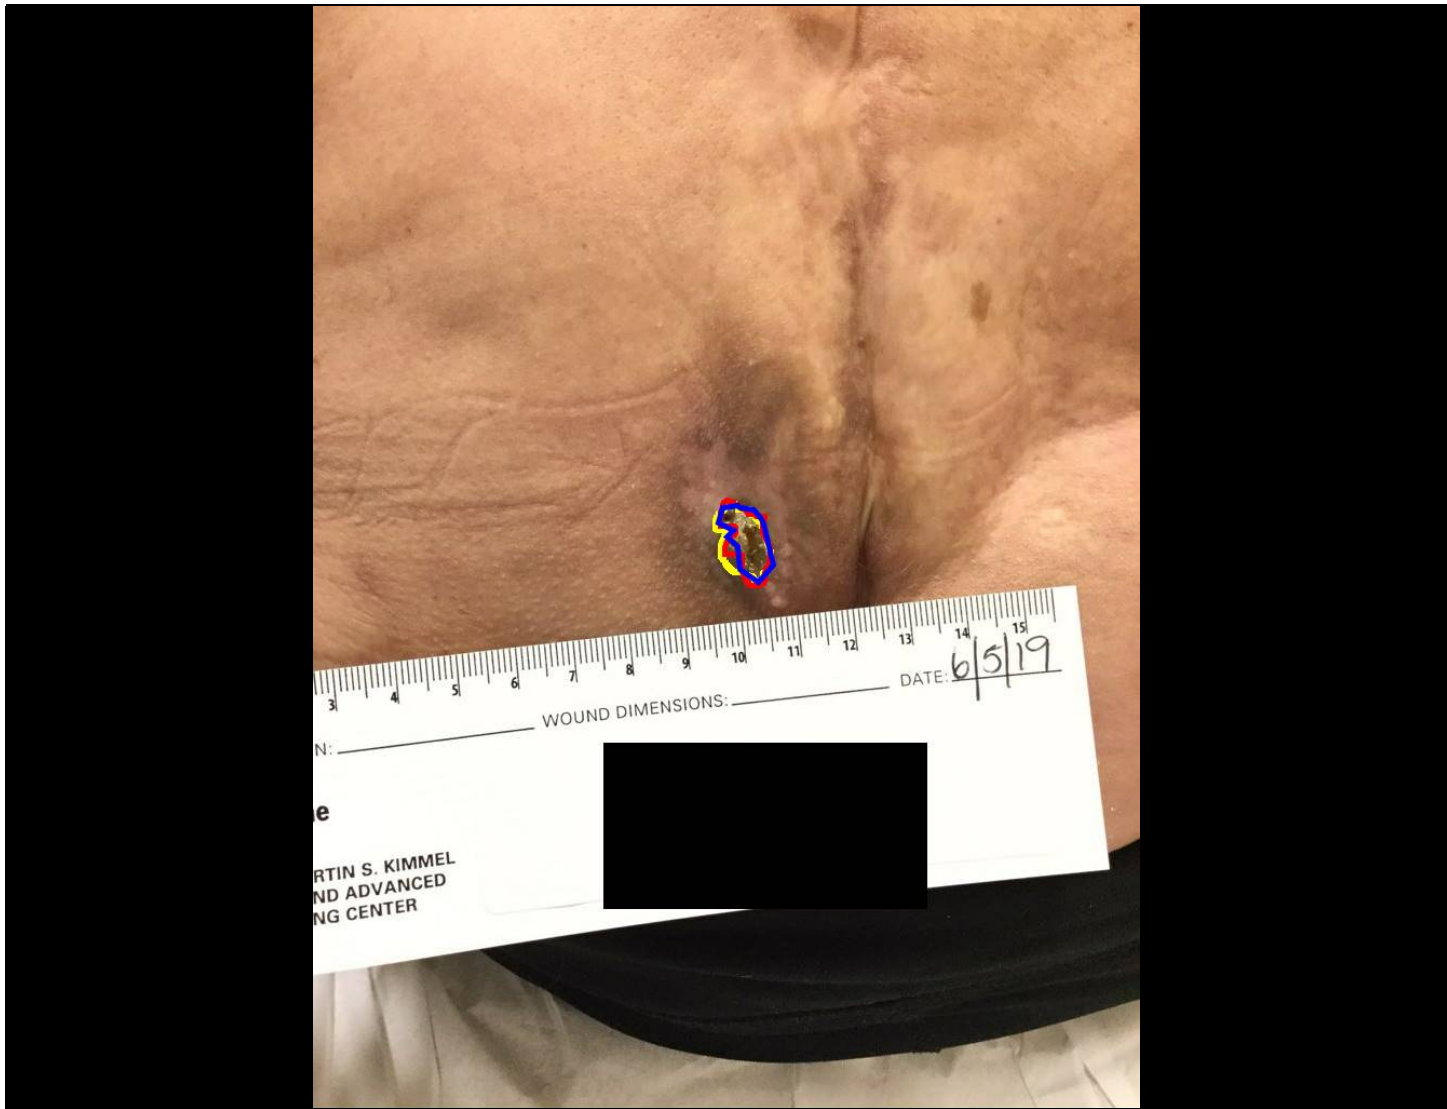

| Tracing Data |                               |                           |                               |
|--------------|-------------------------------|---------------------------|-------------------------------|
| Tracer:      | Wound Area (px <sup>2</sup> ) | Ruler Calibration (px/cm) | Wound Area (cm <sup>2</sup> ) |
| H1           | 2445                          | 52.2                      | 0.90                          |
| H2           | 2134                          | 35.0                      | 1.74                          |
| AI           | 2061                          | 54.3                      | 0.70                          |

| Tracing Comparisons     |                     |                     |                     |                     |
|-------------------------|---------------------|---------------------|---------------------|---------------------|
| Difference Metric:      | Human-Human         |                     | Human-AI            |                     |
|                         | H1(ref)<br>H2(test) | H2(ref)<br>H1(test) | H1(ref)<br>AI(test) | H2(ref)<br>AI(test) |
| False Negative Area (%) | 20.9                | 9.3                 | 22.8                | 14.9                |
| False Positive Area (%) | 8.1                 | 23.9                | 7.1                 | 11.4                |
| Relative Error (%)      | 12.7                | 14.6                | 15.7                | 3.4                 |

| Blinded Attending Surgeon Review |              |                      |                      |                      |              |                         |
|----------------------------------|--------------|----------------------|----------------------|----------------------|--------------|-------------------------|
| Reviewer                         | PGT Estimate | H1 meets definition? | H2 meets definition? | AI meets definition? | Which is AI? | Which is most accurate? |
| 1                                | 0            | Yes                  | Yes                  | Yes                  | H1           | H1                      |
| 2                                | 0            |                      |                      |                      |              |                         |
| 3                                | 0            | No                   | Yes                  | Yes                  | H2           | AI                      |

| Wound EMR Information |        |     |            |                |                   |                  |                  |                               |
|-----------------------|--------|-----|------------|----------------|-------------------|------------------|------------------|-------------------------------|
| Sequential Number     | Gender | Age | Wound Type | Wound Location | Wound Length (cm) | Wound Width (cm) | Wound Depth (cm) | Wound Area (cm <sup>2</sup> ) |
| 87                    | F      | 93  | Arterial   | Left knee      |                   |                  |                  |                               |

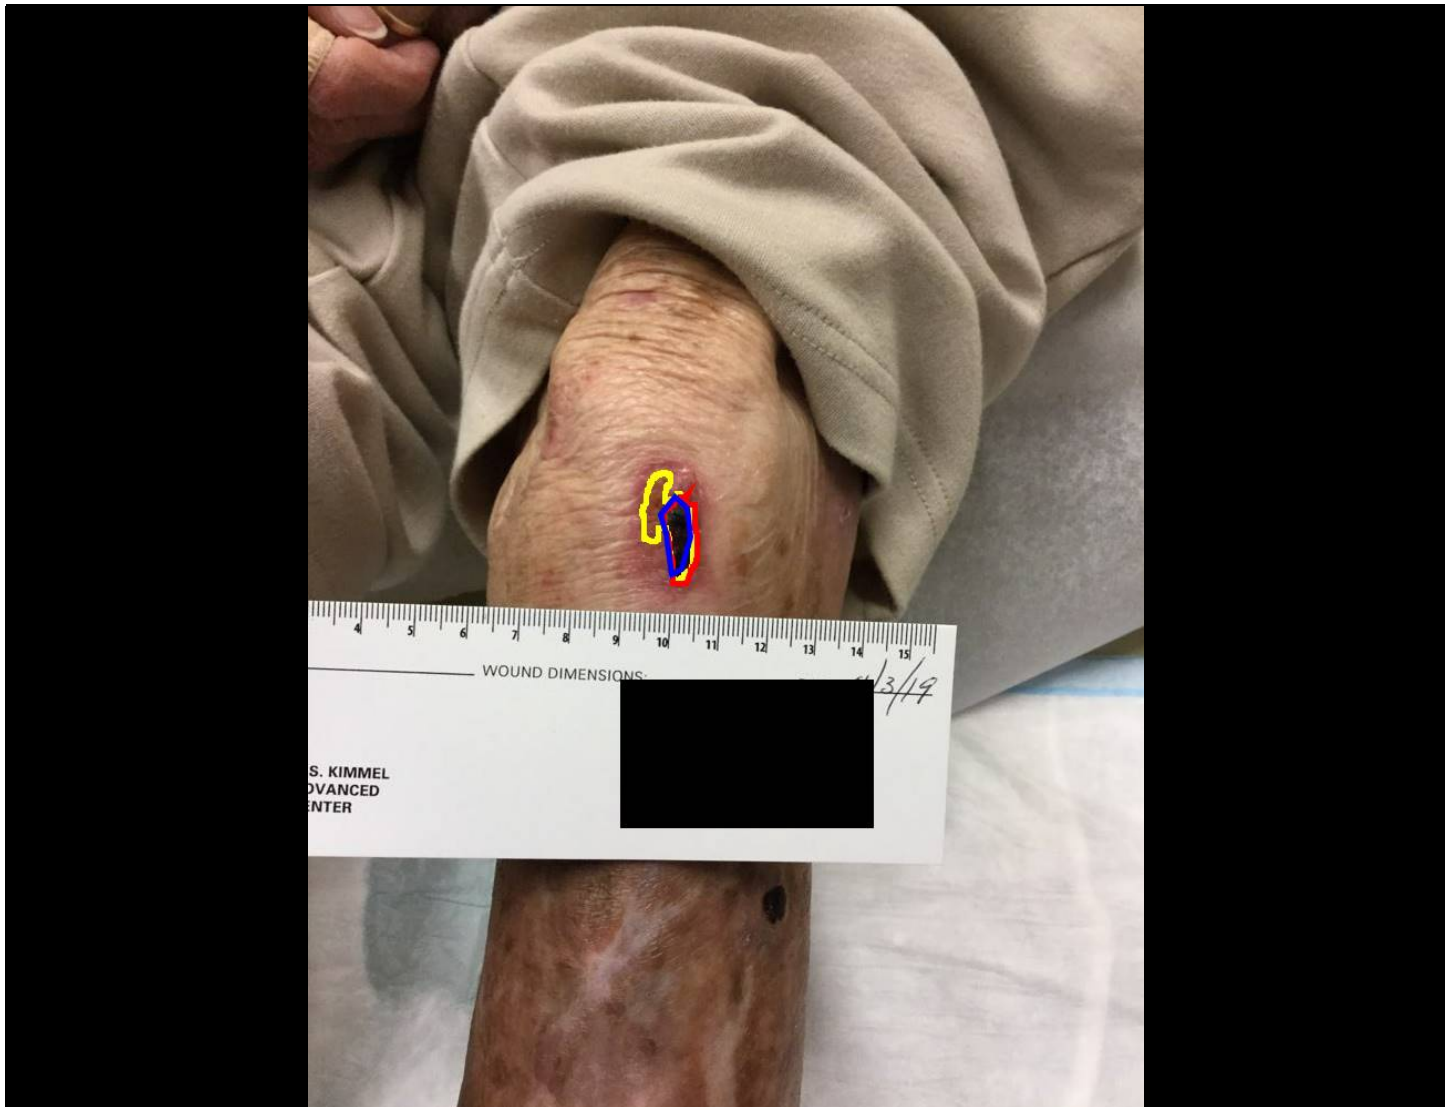

| Tracing Data |                               |                           |                               |
|--------------|-------------------------------|---------------------------|-------------------------------|
| Tracer:      | Wound Area (px <sup>2</sup> ) | Ruler Calibration (px/cm) | Wound Area (cm <sup>2</sup> ) |
| H1           | 2483                          | 44.5                      | 1.25                          |
| H2           | 1705                          | 46.1                      | 0.80                          |
| AI           | 1150                          | 43.8                      | 0.60                          |

| Tracing Comparisons     |                     |                     |                     |                     |
|-------------------------|---------------------|---------------------|---------------------|---------------------|
| Difference Metric:      | Human-Human         |                     | Human-AI            |                     |
|                         | H1(ref)<br>H2(test) | H2(ref)<br>H1(test) | H1(ref)<br>AI(test) | H2(ref)<br>AI(test) |
| False Negative Area (%) | 43.2                | 17.3                | 55.7                | 37.5                |
| False Positive Area (%) | 11.9                | 62.9                | 2.1                 | 4.9                 |
| Relative Error (%)      | 31.3                | 45.6                | 53.7                | 32.6                |

| Blinded Attending Surgeon Review |              |                      |                      |                      |              |                         |
|----------------------------------|--------------|----------------------|----------------------|----------------------|--------------|-------------------------|
| Reviewer                         | PGT Estimate | H1 meets definition? | H2 meets definition? | AI meets definition? | Which is AI? | Which is most accurate? |
| 1                                | 0            | Yes                  | No                   | No                   | H2           | H1                      |
| 2                                | 30           | Yes                  | No                   | No                   | H2           | H1                      |
| 3                                | 0            | No                   | Yes                  | No                   | H2           | H1                      |

| Wound EMR Information |        |     |            |                   |                   |                  |                  |                               |
|-----------------------|--------|-----|------------|-------------------|-------------------|------------------|------------------|-------------------------------|
| Sequential Number     | Gender | Age | Wound Type | Wound Location    | Wound Length (cm) | Wound Width (cm) | Wound Depth (cm) | Wound Area (cm <sup>2</sup> ) |
| 88                    | F      | 50  | Burn       | Left medial lower | 4.0               | 6.0              |                  | 24.00                         |

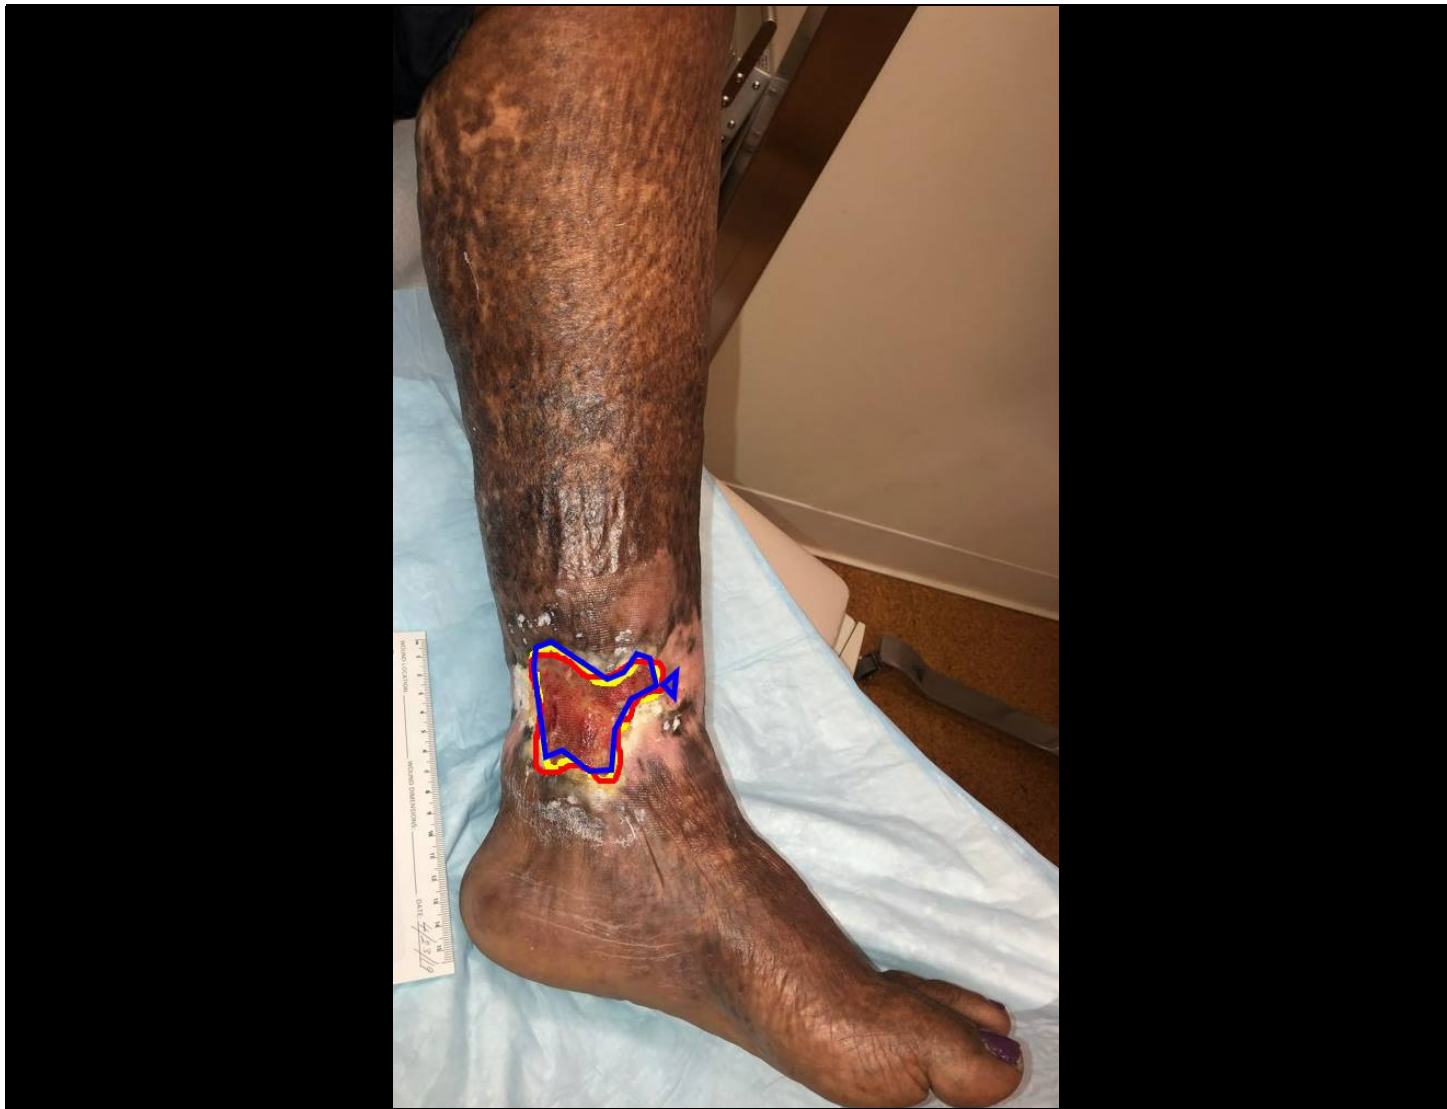

| Tracing Data |                               |                           |                               |
|--------------|-------------------------------|---------------------------|-------------------------------|
| Tracer:      | Wound Area (px <sup>2</sup> ) | Ruler Calibration (px/cm) | Wound Area (cm <sup>2</sup> ) |
| H1           | 8095                          | 14.9                      | 36.67                         |
| H2           | 8650                          | 15.6                      | 35.53                         |
| AI           | 7804                          | 20.1                      | 19.30                         |

| Tracing Comparisons     |                     |                     |                     |                     |
|-------------------------|---------------------|---------------------|---------------------|---------------------|
| Difference Metric:      | Human-Human         |                     | Human-AI            |                     |
|                         | H1(ref)<br>H2(test) | H2(ref)<br>H1(test) | H1(ref)<br>AI(test) | H2(ref)<br>AI(test) |
| False Negative Area (%) | 5.1                 | 11.2                | 11.3                | 17.9                |
| False Positive Area (%) | 12.0                | 4.8                 | 7.7                 | 8.1                 |
| Relative Error (%)      | 6.9                 | 6.4                 | 3.6                 | 9.8                 |

| Blinded Attending Surgeon Review |              |                      |                      |                      |              |                         |
|----------------------------------|--------------|----------------------|----------------------|----------------------|--------------|-------------------------|
| Reviewer                         | PGT Estimate | H1 meets definition? | H2 meets definition? | AI meets definition? | Which is AI? | Which is most accurate? |
| 1                                | 90           | Yes                  | Yes                  | Yes                  | H1           | H1                      |
| 2                                | 100          | Yes                  | Yes                  | Yes                  | AI           | H1                      |
| 3                                | 100          | Yes                  | No                   | No                   | H1           | H2                      |

| Wound EMR Information |        |     |            |                |                   |                  |                  |                               |
|-----------------------|--------|-----|------------|----------------|-------------------|------------------|------------------|-------------------------------|
| Sequential Number     | Gender | Age | Wound Type | Wound Location | Wound Length (cm) | Wound Width (cm) | Wound Depth (cm) | Wound Area (cm <sup>2</sup> ) |
| 89                    | M      | 77  | Radiation  | Lower back     |                   |                  |                  |                               |

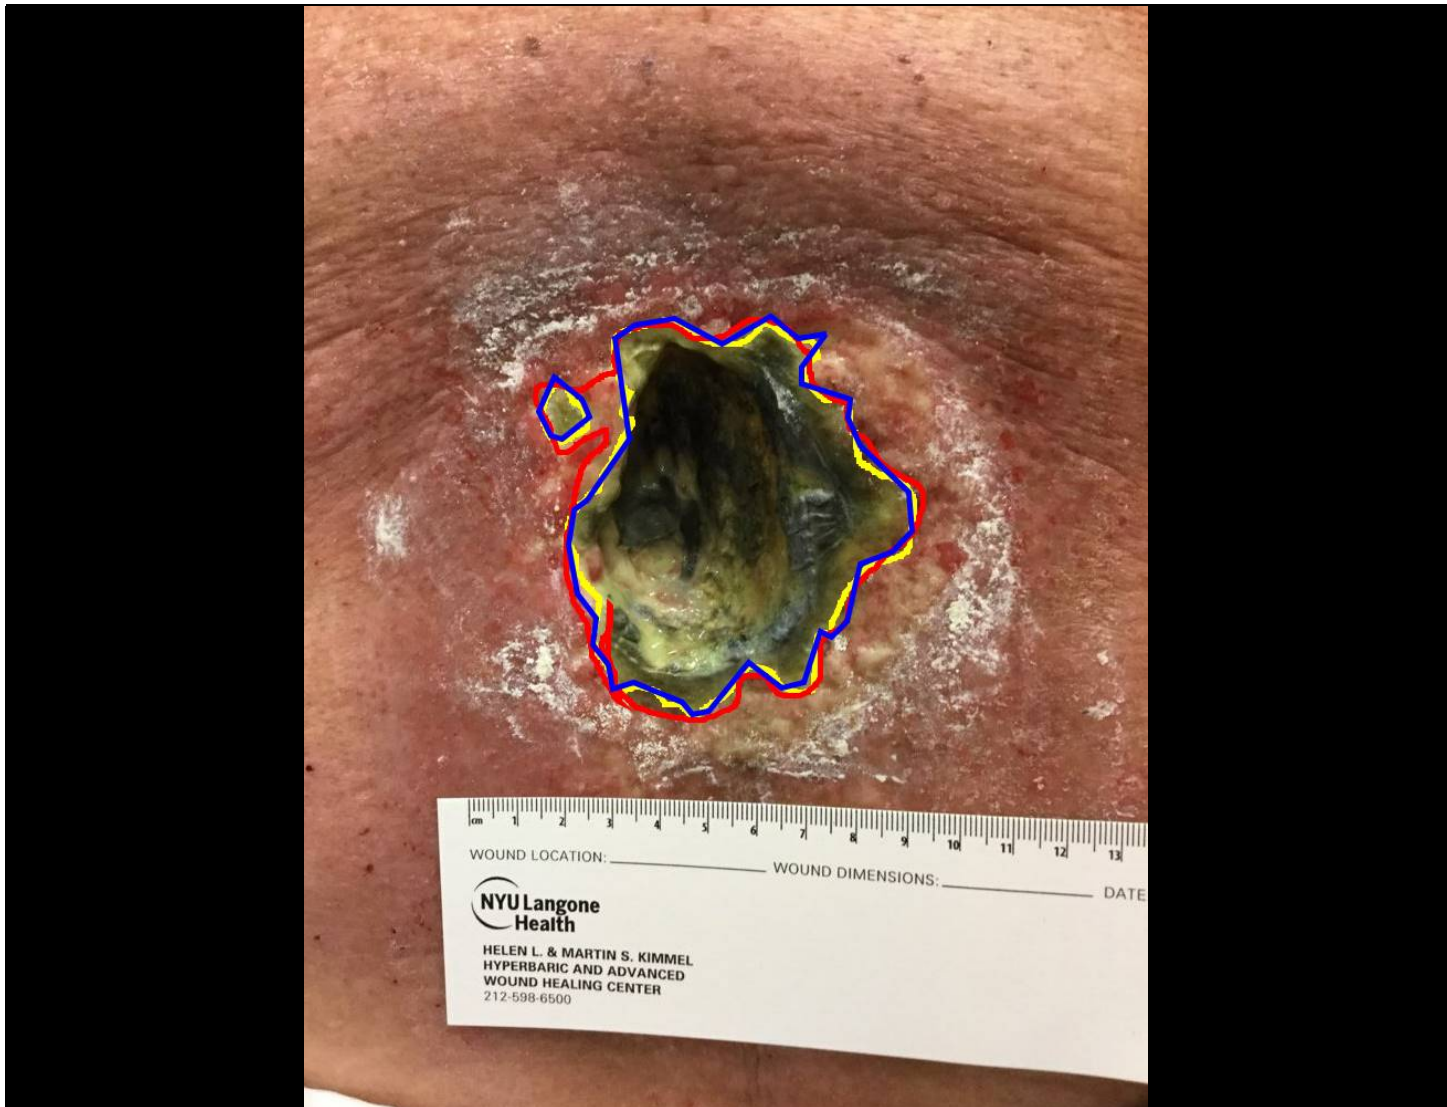

| Tracing Data |                               |                           |                               |
|--------------|-------------------------------|---------------------------|-------------------------------|
| Tracer:      | Wound Area (px <sup>2</sup> ) | Ruler Calibration (px/cm) | Wound Area (cm <sup>2</sup> ) |
| H1           | 74898                         | 43.5                      | 39.52                         |
| H2           | 83376                         | 43.7                      | 43.64                         |
| AI           | 75739                         | 42.4                      | 42.20                         |

| Tracing Comparisons     |                     |                     |                     |                     |
|-------------------------|---------------------|---------------------|---------------------|---------------------|
| Difference Metric:      | Human-Human         |                     | Human-AI            |                     |
|                         | H1(ref)<br>H2(test) | H2(ref)<br>H1(test) | H1(ref)<br>AI(test) | H2(ref)<br>AI(test) |
| False Negative Area (%) | 1.2                 | 11.2                | 2.3                 | 10.4                |
| False Positive Area (%) | 12.5                | 1.1                 | 3.4                 | 1.2                 |
| Relative Error (%)      | 11.3                | 10.2                | 1.1                 | 9.2                 |

| Blinded Attending Surgeon Review |              |                      |                      |                      |              |                         |
|----------------------------------|--------------|----------------------|----------------------|----------------------|--------------|-------------------------|
| Reviewer                         | PGT Estimate | H1 meets definition? | H2 meets definition? | AI meets definition? | Which is AI? | Which is most accurate? |
| 1                                | 0            | Yes                  | Yes                  | Yes                  | H1           | AI                      |
| 2                                | 0            | Yes                  | Yes                  | Yes                  | H1           | AI                      |
| 3                                | 10           | Yes                  | Yes                  | Yes                  | AI           | H1                      |

| Wound EMR Information |        |     |            |                |                   |                  |                  |                               |
|-----------------------|--------|-----|------------|----------------|-------------------|------------------|------------------|-------------------------------|
| Sequential Number     | Gender | Age | Wound Type | Wound Location | Wound Length (cm) | Wound Width (cm) | Wound Depth (cm) | Wound Area (cm <sup>2</sup> ) |
| 90                    | F      | 26  | Pressure   | Right ischium  | 3.0               | 5.0              |                  | 15.00                         |

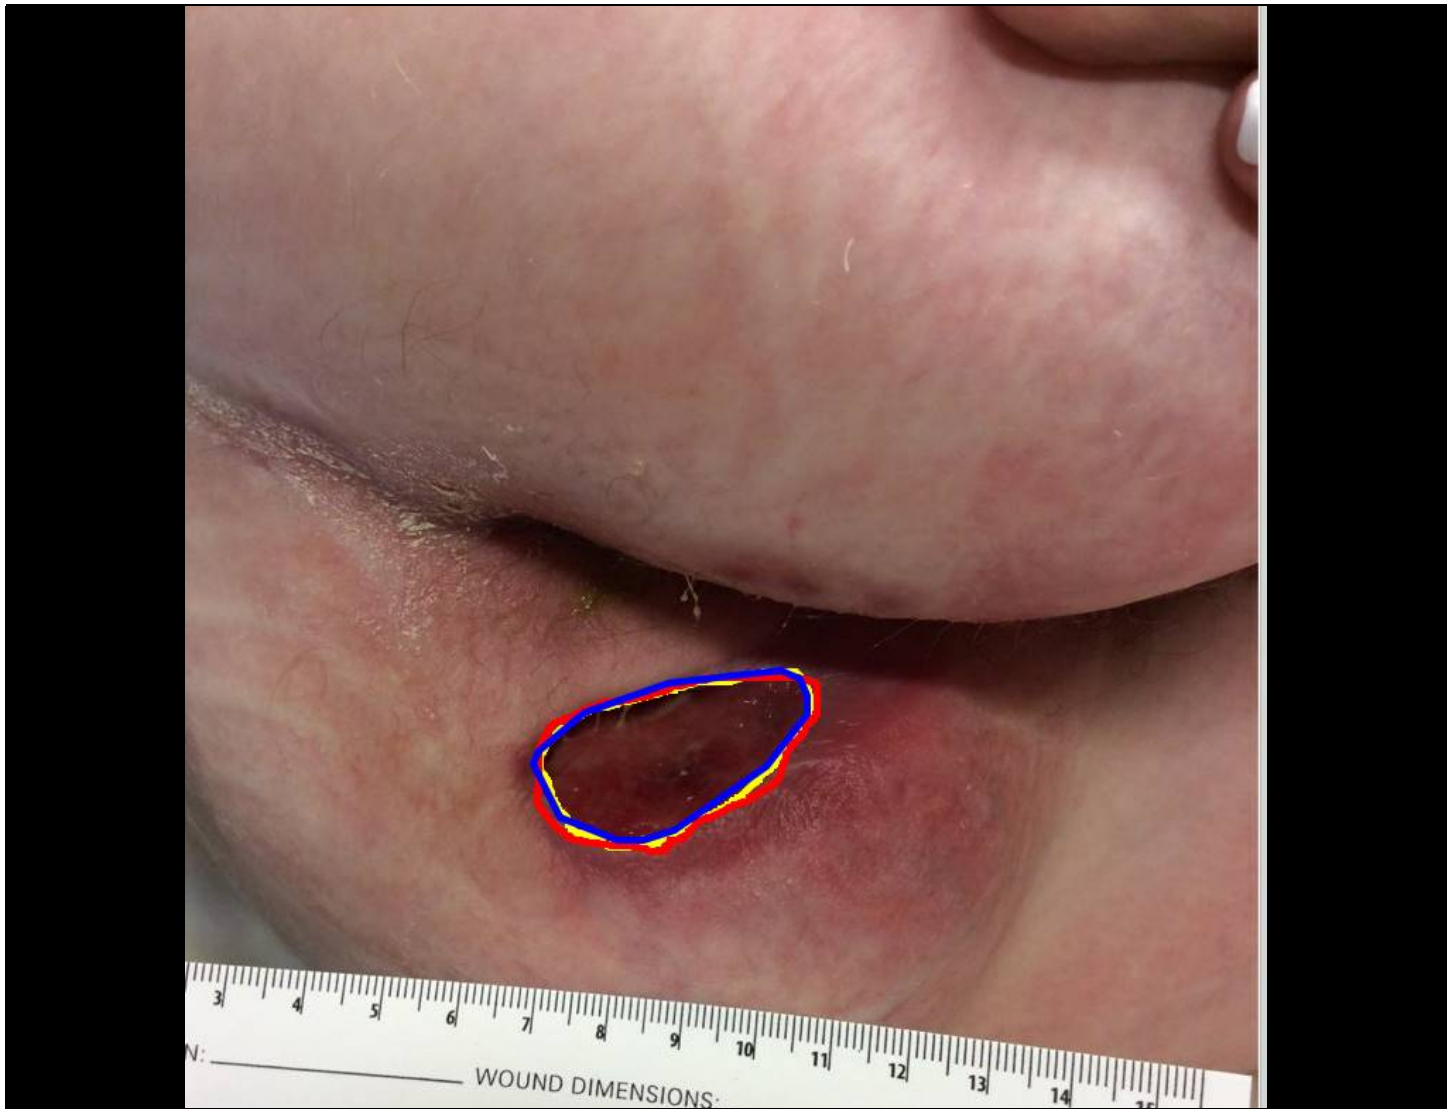

| Tracing Data |                               |                           |                               |
|--------------|-------------------------------|---------------------------|-------------------------------|
| Tracer:      | Wound Area (px <sup>2</sup> ) | Ruler Calibration (px/cm) | Wound Area (cm <sup>2</sup> ) |
| H1           | 15591                         | 52.8                      | 5.60                          |
| H2           | 17098                         | 53.3                      | 6.02                          |
| AI           | 14993                         | 52.7                      | 5.40                          |

| Tracing Comparisons     |                     |                     |                     |                     |
|-------------------------|---------------------|---------------------|---------------------|---------------------|
| Difference Metric:      | Human-Human         |                     | Human-AI            |                     |
|                         | H1(ref)<br>H2(test) | H2(ref)<br>H1(test) | H1(ref)<br>AI(test) | H2(ref)<br>AI(test) |
| False Negative Area (%) | 0.9                 | 9.7                 | 6.2                 | 13.8                |
| False Positive Area (%) | 10.6                | 0.8                 | 2.4                 | 1.5                 |
| Relative Error (%)      | 9.7                 | 8.8                 | 3.8                 | 12.3                |

| Blinded Attending Surgeon Review |              |                      |                      |                      |              |                         |
|----------------------------------|--------------|----------------------|----------------------|----------------------|--------------|-------------------------|
| Reviewer                         | PGT Estimate | H1 meets definition? | H2 meets definition? | AI meets definition? | Which is AI? | Which is most accurate? |
| 1                                | 100          | Yes                  | Yes                  | Yes                  | H2           | AI                      |
| 2                                | 100          | Yes                  | Yes                  | Yes                  | H1           | H1                      |
| 3                                | 100          | Yes                  | Yes                  | Yes                  | H1           | AI                      |

| Wound EMR Information |        |     |            |                  |                   |                  |                  |                               |
|-----------------------|--------|-----|------------|------------------|-------------------|------------------|------------------|-------------------------------|
| Sequential Number     | Gender | Age | Wound Type | Wound Location   | Wound Length (cm) | Wound Width (cm) | Wound Depth (cm) | Wound Area (cm <sup>2</sup> ) |
| 93                    | F      | 72  | Pressure   | Left lateral leg | 21.0              | 6.5              | 31.0             | 136.50                        |

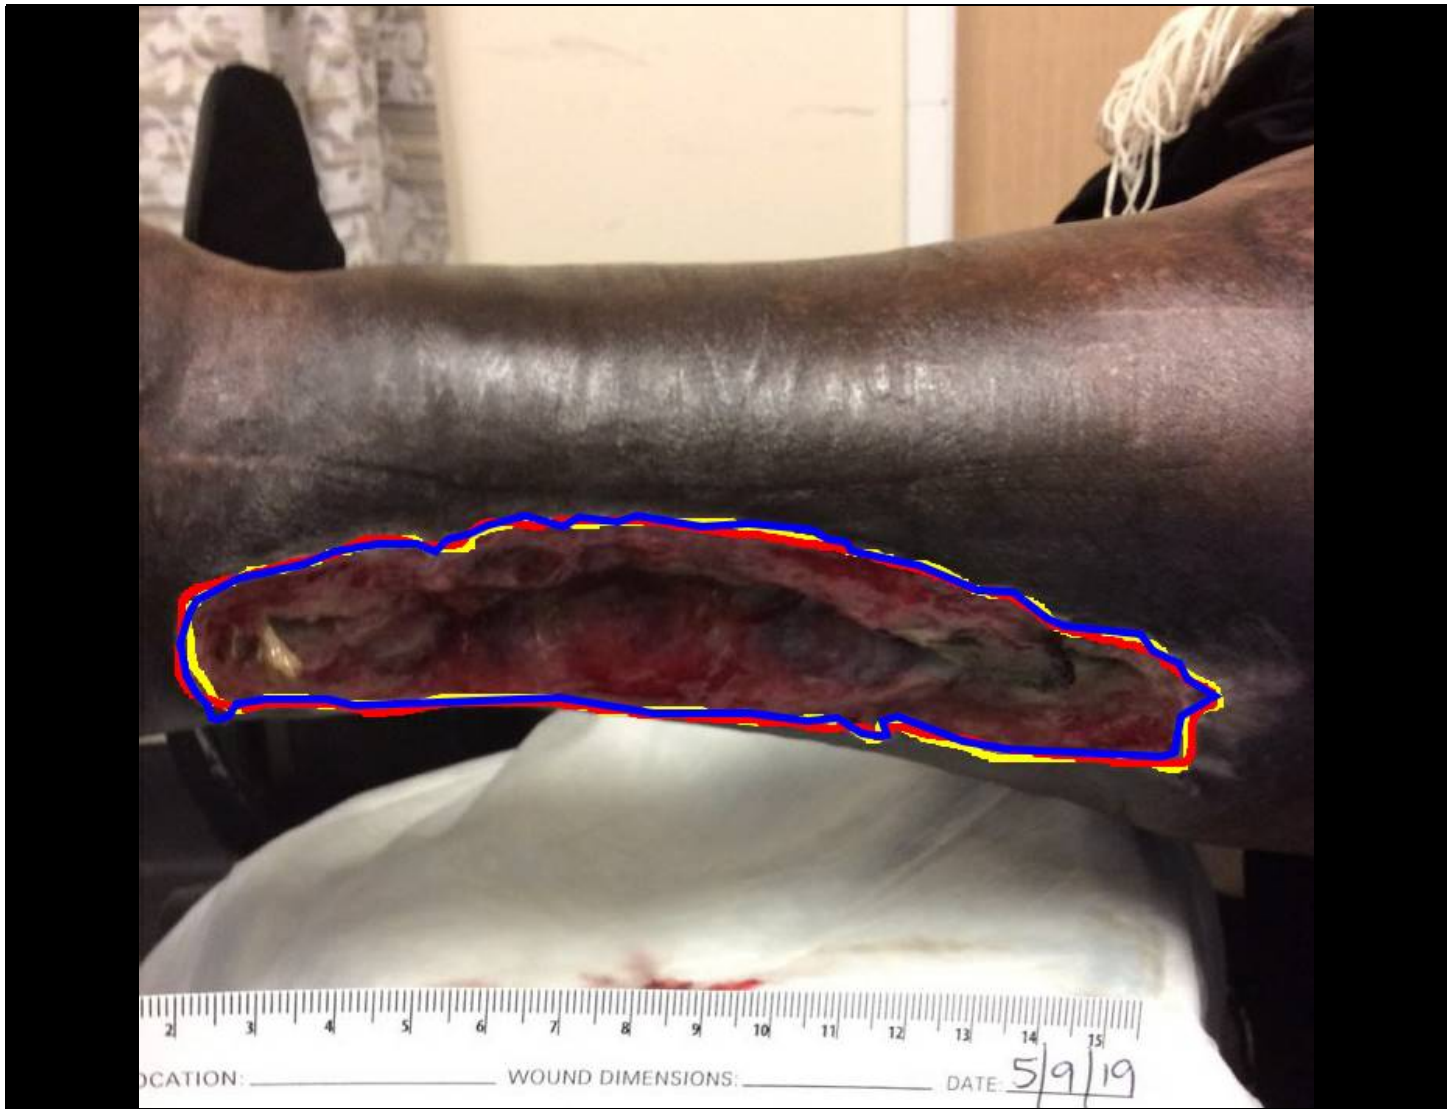

| Tracing Data |                               |                           |                               |
|--------------|-------------------------------|---------------------------|-------------------------------|
| Tracer:      | Wound Area (px <sup>2</sup> ) | Ruler Calibration (px/cm) | Wound Area (cm <sup>2</sup> ) |
| H1           | 65917                         | 45.8                      | 31.38                         |
| H2           | 66390                         | 41.5                      | 38.61                         |
| AI           | 65366                         | 47.6                      | 28.90                         |

| Tracing Comparisons     |                     |                     |                     |                     |
|-------------------------|---------------------|---------------------|---------------------|---------------------|
| Difference Metric:      | Human-Human         |                     | Human-AI            |                     |
|                         | H1(ref)<br>H2(test) | H2(ref)<br>H1(test) | H1(ref)<br>AI(test) | H2(ref)<br>AI(test) |
| False Negative Area (%) | 2.6                 | 3.3                 | 3.3                 | 3.8                 |
| False Positive Area (%) | 3.3                 | 2.6                 | 2.4                 | 2.3                 |
| Relative Error (%)      | 0.7                 | 0.7                 | 0.8                 | 1.5                 |

| Blinded Attending Surgeon Review |              |                      |                      |                      |              |                         |
|----------------------------------|--------------|----------------------|----------------------|----------------------|--------------|-------------------------|
| Reviewer                         | PGT Estimate | H1 meets definition? | H2 meets definition? | AI meets definition? | Which is AI? | Which is most accurate? |
| 1                                | 80           | Yes                  | Yes                  | Yes                  | H2           | H1                      |
| 2                                | 100          | Yes                  | Yes                  | Yes                  | H2           | AI                      |
| 3                                | 50           | Yes                  | Yes                  | Yes                  | H2           | H1                      |

| Wound EMR Information |        |     |            |                |                   |                  |                  |                               |
|-----------------------|--------|-----|------------|----------------|-------------------|------------------|------------------|-------------------------------|
| Sequential Number     | Gender | Age | Wound Type | Wound Location | Wound Length (cm) | Wound Width (cm) | Wound Depth (cm) | Wound Area (cm <sup>2</sup> ) |
| 94                    | F      | 72  | IV         | Right forearm  |                   |                  |                  |                               |

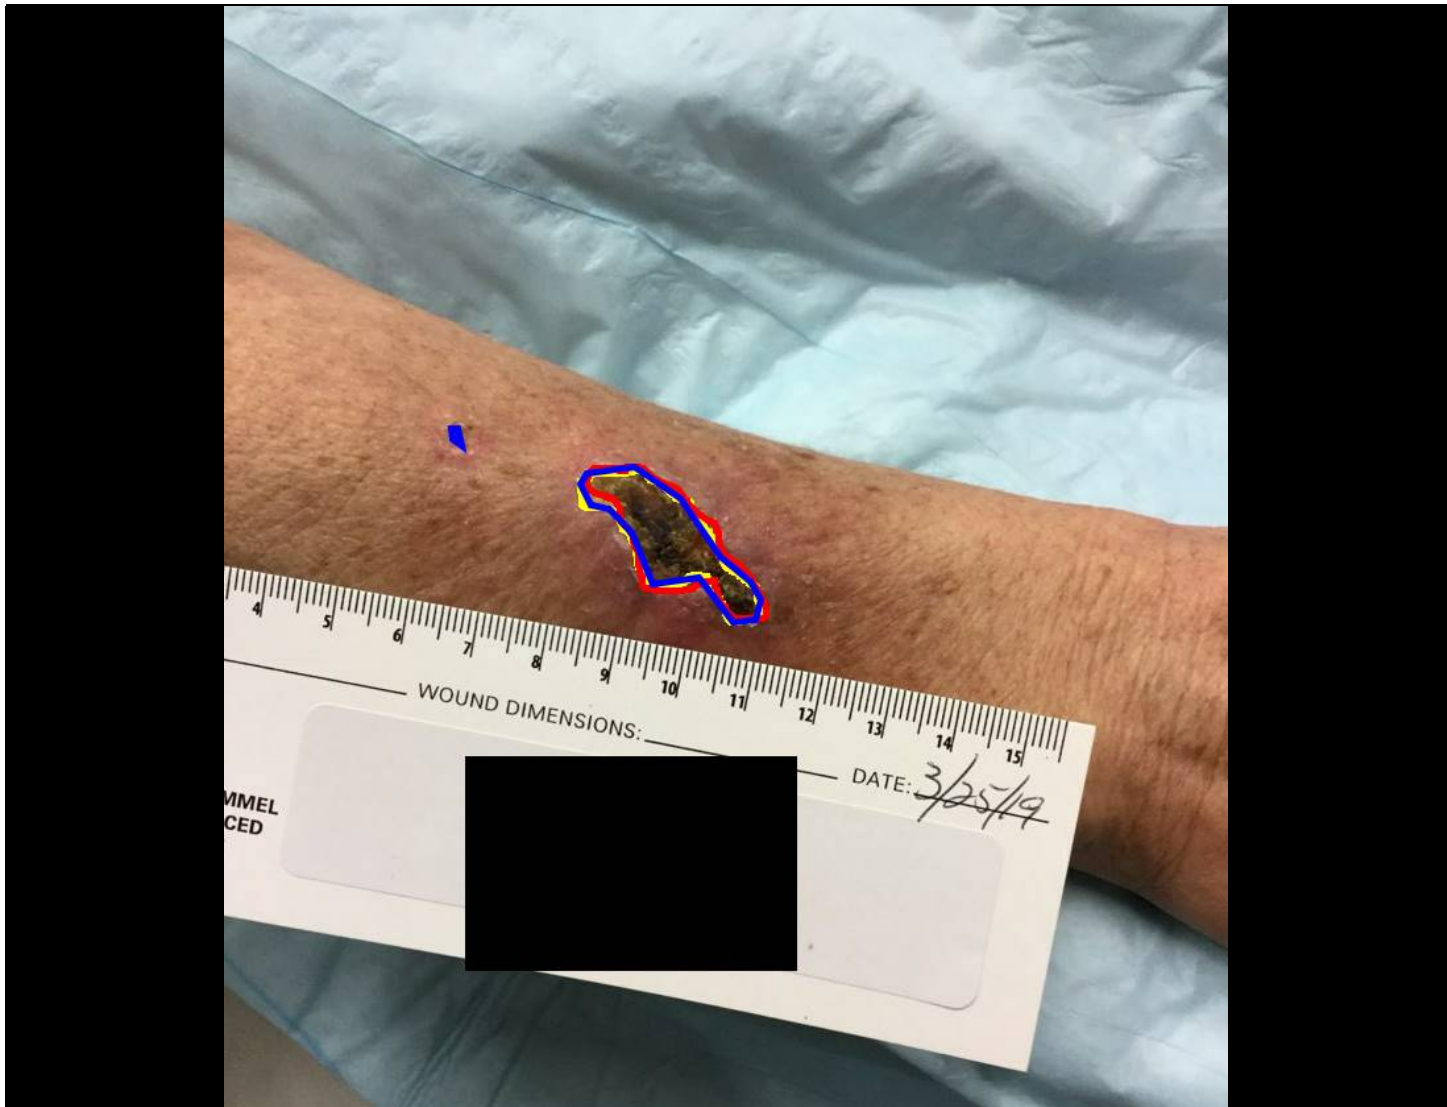

| Tracing Data |                               |                           |                               |
|--------------|-------------------------------|---------------------------|-------------------------------|
| Tracer:      | Wound Area (px <sup>2</sup> ) | Ruler Calibration (px/cm) | Wound Area (cm <sup>2</sup> ) |
| H1           | 6197                          | 53.0                      | 2.20                          |
| H2           | 6642                          | 53.9                      | 2.29                          |
| AI           | 6065                          | 51.4                      | 2.30                          |

| Tracing Comparisons     |                     |                     |                     |                     |
|-------------------------|---------------------|---------------------|---------------------|---------------------|
| Difference Metric:      | Human-Human         |                     | Human-AI            |                     |
|                         | H1(ref)<br>H2(test) | H2(ref)<br>H1(test) | H1(ref)<br>AI(test) | H2(ref)<br>AI(test) |
| False Negative Area (%) | 7.5                 | 13.7                | 7.9                 | 16.1                |
| False Positive Area (%) | 14.7                | 7.0                 | 5.7                 | 7.4                 |
| Relative Error (%)      | 7.2                 | 6.7                 | 2.1                 | 8.7                 |

| Blinded Attending Surgeon Review |              |                      |                      |                      |              |                         |
|----------------------------------|--------------|----------------------|----------------------|----------------------|--------------|-------------------------|
| Reviewer                         | PGT Estimate | H1 meets definition? | H2 meets definition? | AI meets definition? | Which is AI? | Which is most accurate? |
| 1                                | 10           | No                   | No                   | Yes                  | H2           | H1                      |
| 2                                | 0            | Yes                  | Yes                  | Yes                  | H1           | AI                      |
| 3                                | 0            | Yes                  | Yes                  | No                   | H2           | H1                      |



| Wound EMR Information |        |     |            |                  |                   |                  |                  |                               |
|-----------------------|--------|-----|------------|------------------|-------------------|------------------|------------------|-------------------------------|
| Sequential Number     | Gender | Age | Wound Type | Wound Location   | Wound Length (cm) | Wound Width (cm) | Wound Depth (cm) | Wound Area (cm <sup>2</sup> ) |
| 95                    | M      | 63  | Pressure   | Left medial foot |                   |                  |                  |                               |

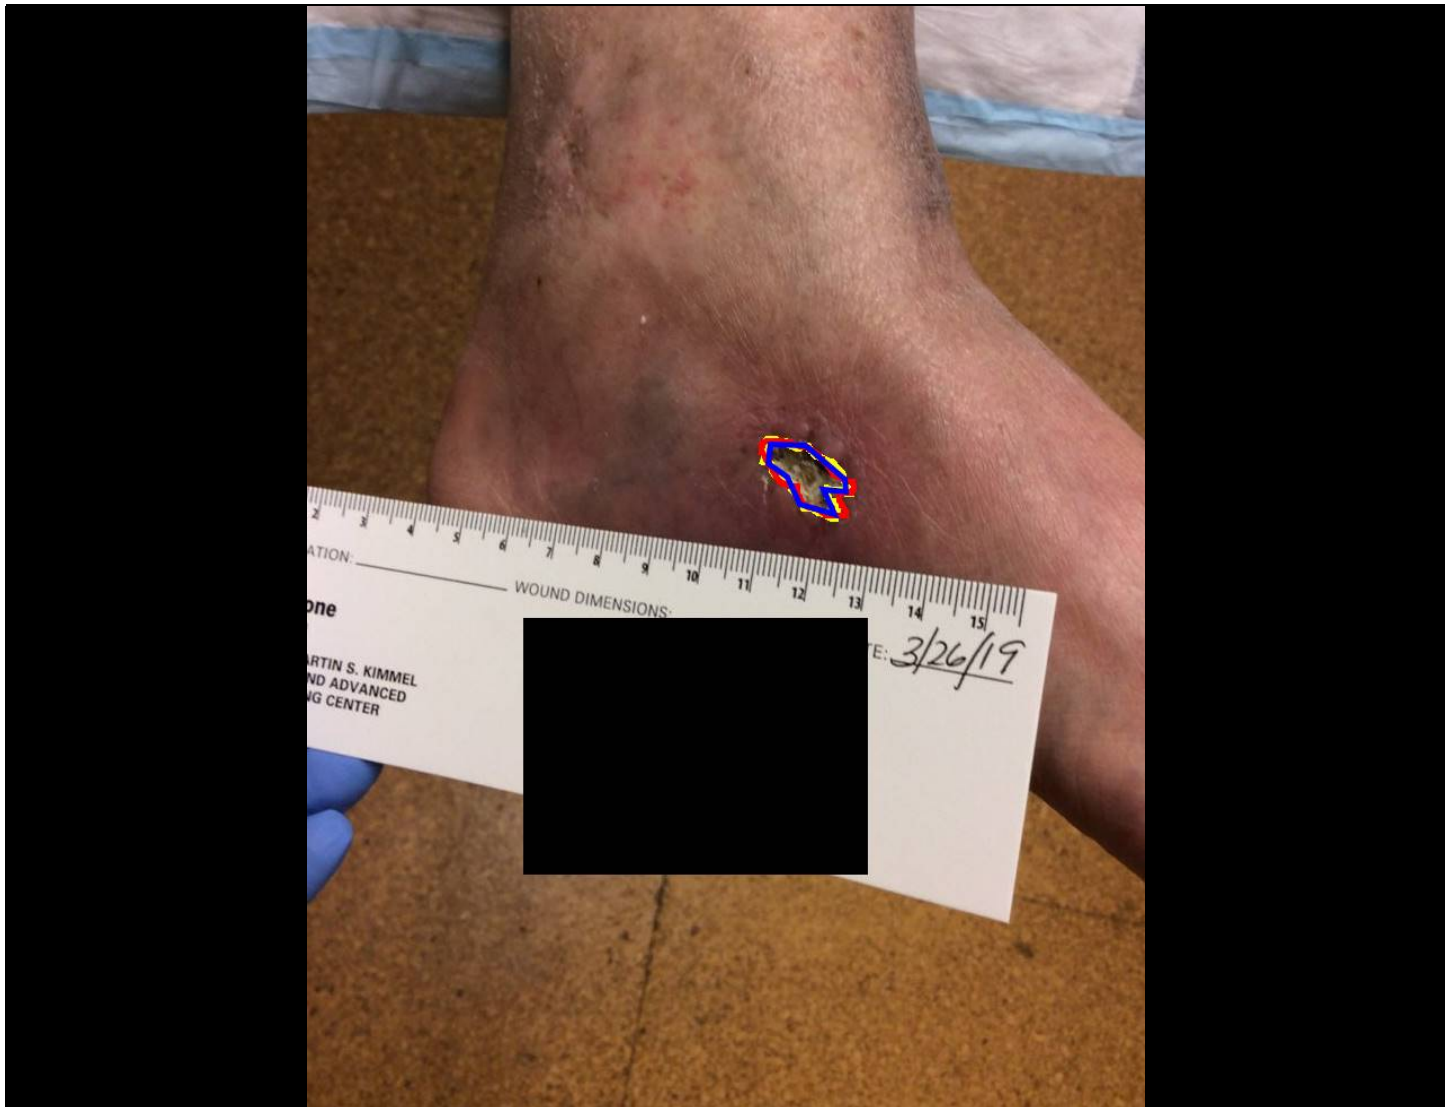

| Tracing Data |                               |                           |                               |
|--------------|-------------------------------|---------------------------|-------------------------------|
| Tracer:      | Wound Area (px <sup>2</sup> ) | Ruler Calibration (px/cm) | Wound Area (cm <sup>2</sup> ) |
| H1           | 2708                          | 51.3                      | 1.03                          |
| H2           | 2836                          | 50.5                      | 1.11                          |
| AI           | 2300                          | 48.0                      | 1.00                          |

| Tracing Comparisons     |                     |                     |                     |                     |
|-------------------------|---------------------|---------------------|---------------------|---------------------|
| Difference Metric:      | Human-Human         |                     | Human-AI            |                     |
|                         | H1(ref)<br>H2(test) | H2(ref)<br>H1(test) | H1(ref)<br>AI(test) | H2(ref)<br>AI(test) |
| False Negative Area (%) | 8.6                 | 12.7                | 17.4                | 22.2                |
| False Positive Area (%) | 13.3                | 8.2                 | 2.4                 | 3.3                 |
| Relative Error (%)      | 4.7                 | 4.5                 | 15.1                | 18.9                |

| Blinded Attending Surgeon Review |              |                      |                      |                      |              |                         |
|----------------------------------|--------------|----------------------|----------------------|----------------------|--------------|-------------------------|
| Reviewer                         | PGT Estimate | H1 meets definition? | H2 meets definition? | AI meets definition? | Which is AI? | Which is most accurate? |
| 1                                | 10           | Yes                  | Yes                  | Yes                  | H2           | H2                      |
| 2                                | 20           | Yes                  | Yes                  | Yes                  | H1           | H2                      |
| 3                                | 0            | Yes                  | Yes                  | Yes                  | H2           | H2                      |

| Wound EMR Information |        |     |            |                |                   |                  |                  |                               |
|-----------------------|--------|-----|------------|----------------|-------------------|------------------|------------------|-------------------------------|
| Sequential Number     | Gender | Age | Wound Type | Wound Location | Wound Length (cm) | Wound Width (cm) | Wound Depth (cm) | Wound Area (cm <sup>2</sup> ) |
| 96                    | F      | 72  | Pressure   | Left ischium   |                   |                  |                  |                               |

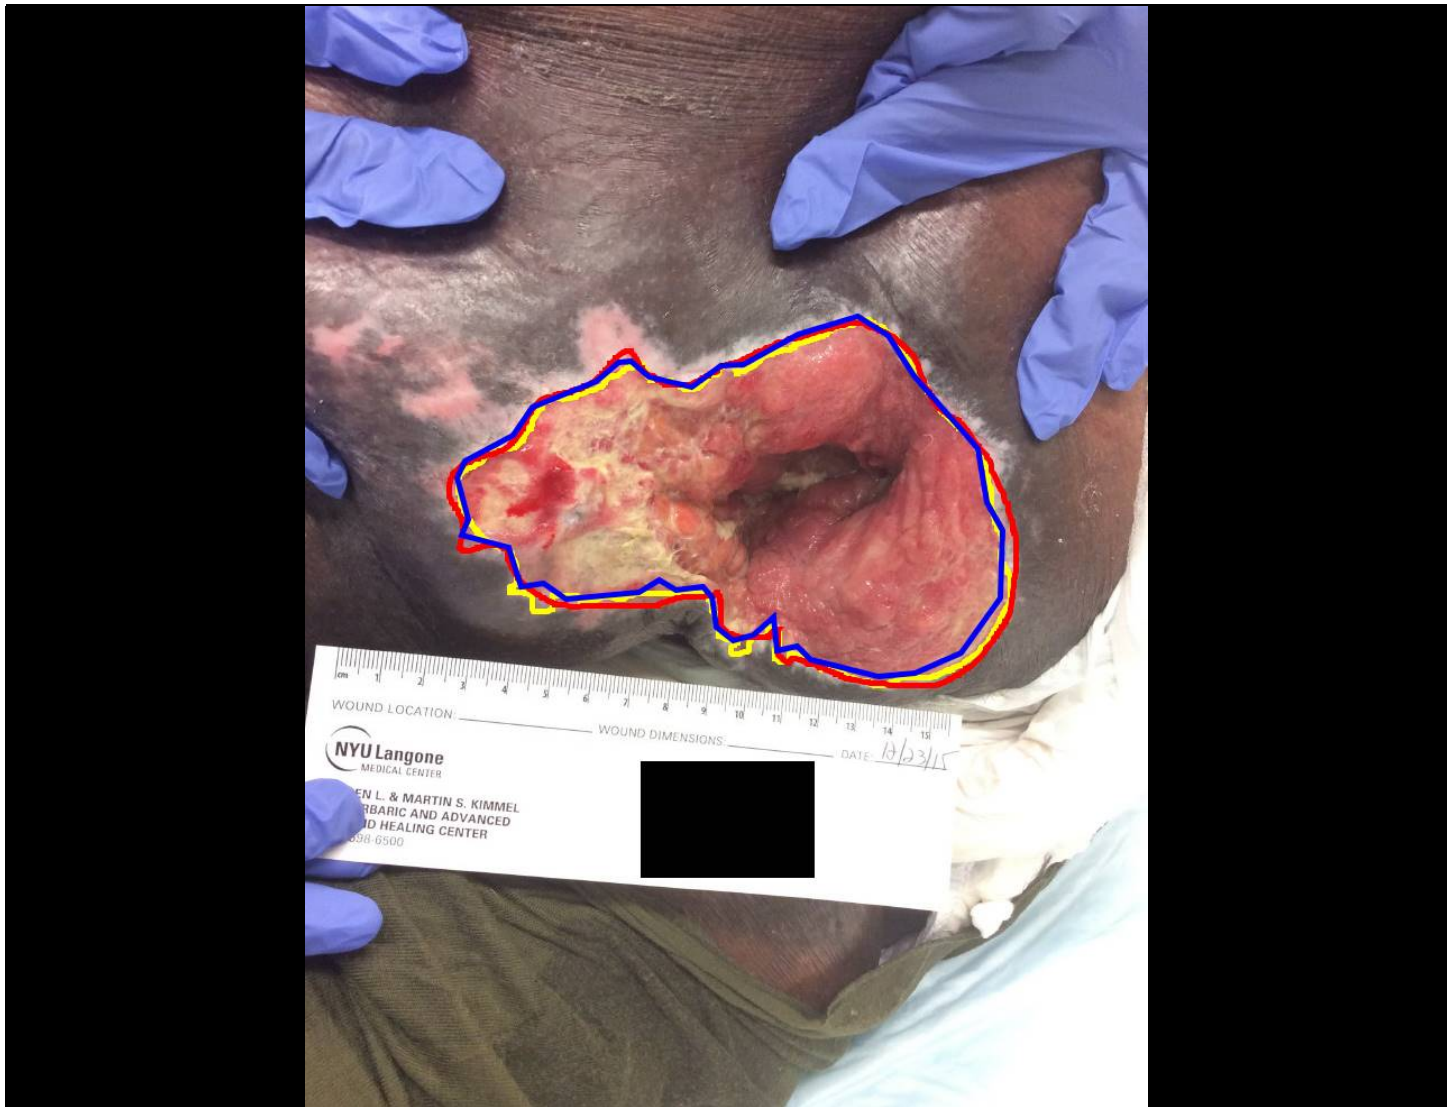

| Tracing Data |                               |                           |                               |
|--------------|-------------------------------|---------------------------|-------------------------------|
| Tracer:      | Wound Area (px <sup>2</sup> ) | Ruler Calibration (px/cm) | Wound Area (cm <sup>2</sup> ) |
| H1           | 102584                        | 35.8                      | 80.09                         |
| H2           | 107509                        | 36.1                      | 82.49                         |
| AI           | 100653                        | 35.6                      | 79.20                         |

| Tracing Comparisons     |                     |                     |                     |                     |
|-------------------------|---------------------|---------------------|---------------------|---------------------|
| Difference Metric:      | Human-Human         |                     | Human-AI            |                     |
|                         | H1(ref)<br>H2(test) | H2(ref)<br>H1(test) | H1(ref)<br>AI(test) | H2(ref)<br>AI(test) |
| False Negative Area (%) | 1.1                 | 5.6                 | 4.0                 | 7.2                 |
| False Positive Area (%) | 5.9                 | 1.0                 | 2.1                 | 0.8                 |
| Relative Error (%)      | 4.8                 | 4.6                 | 1.9                 | 6.4                 |

| Blinded Attending Surgeon Review |              |                      |                      |                      |              |                         |
|----------------------------------|--------------|----------------------|----------------------|----------------------|--------------|-------------------------|
| Reviewer                         | PGT Estimate | H1 meets definition? | H2 meets definition? | AI meets definition? | Which is AI? | Which is most accurate? |
| 1                                | 70           | Yes                  | Yes                  | Yes                  | H2           | H2                      |
| 2                                | 90           | Yes                  | Yes                  | Yes                  | AI           | AI                      |
| 3                                | 60           | No                   | No                   | No                   | H2           | H2                      |

| Wound EMR Information |        |     |             |                   |                   |                  |                  |                               |
|-----------------------|--------|-----|-------------|-------------------|-------------------|------------------|------------------|-------------------------------|
| Sequential Number     | Gender | Age | Wound Type  | Wound Location    | Wound Length (cm) | Wound Width (cm) | Wound Depth (cm) | Wound Area (cm <sup>2</sup> ) |
| 97                    | F      | 72  | Insect bite | Right lateral leg |                   |                  |                  |                               |

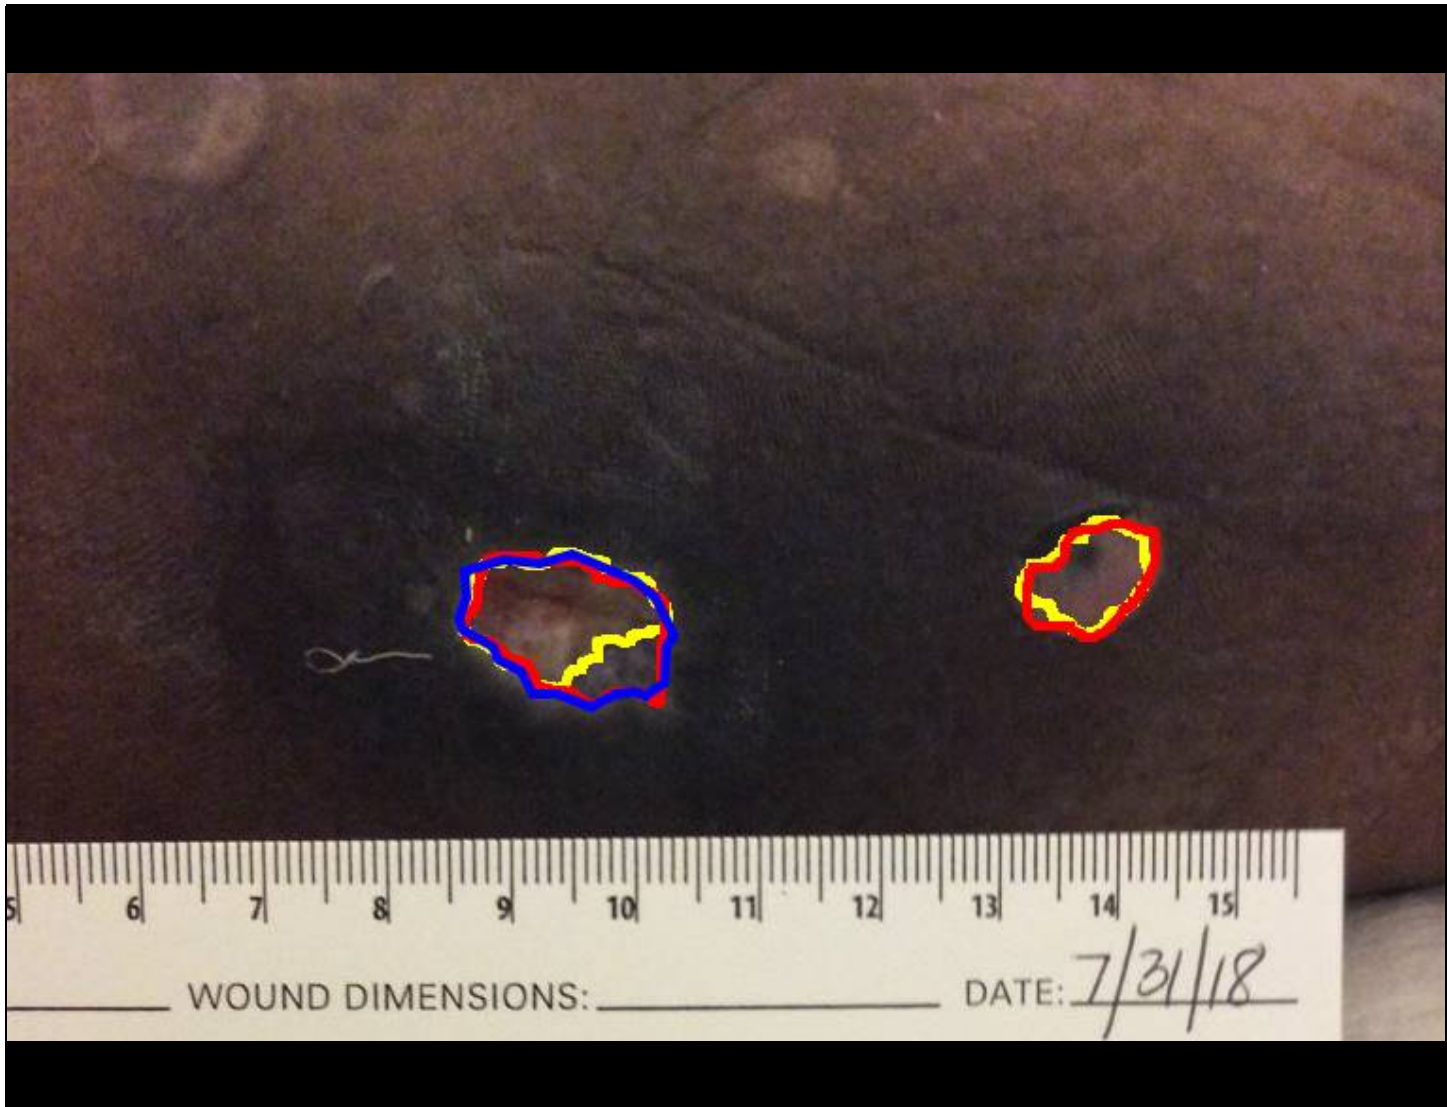

| Tracing Data |                               |                           |                               |
|--------------|-------------------------------|---------------------------|-------------------------------|
| Tracer:      | Wound Area (px <sup>2</sup> ) | Ruler Calibration (px/cm) | Wound Area (cm <sup>2</sup> ) |
| H1           | 7400                          | 65.8                      | 1.71                          |
| H2           | 8730                          | 68.0                      | 1.89                          |
| AI           | 6442                          | 65.5                      | 1.50                          |

| Tracing Comparisons     |                     |                     |                     |                     |
|-------------------------|---------------------|---------------------|---------------------|---------------------|
| Difference Metric:      | Human-Human         |                     | Human-AI            |                     |
|                         | H1(ref)<br>H2(test) | H2(ref)<br>H1(test) | H1(ref)<br>AI(test) | H2(ref)<br>AI(test) |
| False Negative Area (%) | 8.0                 | 22.0                | 36.3                | 34.2                |
| False Positive Area (%) | 26.0                | 6.8                 | 23.4                | 7.9                 |
| Relative Error (%)      | 18.0                | 15.2                | 12.9                | 26.2                |

| Blinded Attending Surgeon Review |              |                      |                      |                      |              |                         |
|----------------------------------|--------------|----------------------|----------------------|----------------------|--------------|-------------------------|
| Reviewer                         | PGT Estimate | H1 meets definition? | H2 meets definition? | AI meets definition? | Which is AI? | Which is most accurate? |
| 1                                | 100          | No                   | No                   | Yes                  | H1           | AI                      |
| 2                                | 50           | Yes                  | Yes                  | Yes                  | H1           | H1                      |
| 3                                | 100          | No                   | No                   | No                   | AI           | AI                      |

| Wound EMR Information |        |     |            |                |                   |                  |                  |                               |
|-----------------------|--------|-----|------------|----------------|-------------------|------------------|------------------|-------------------------------|
| Sequential Number     | Gender | Age | Wound Type | Wound Location | Wound Length (cm) | Wound Width (cm) | Wound Depth (cm) | Wound Area (cm <sup>2</sup> ) |
| 98                    | F      | 73  | Surgical   | Left elbow     |                   |                  |                  |                               |

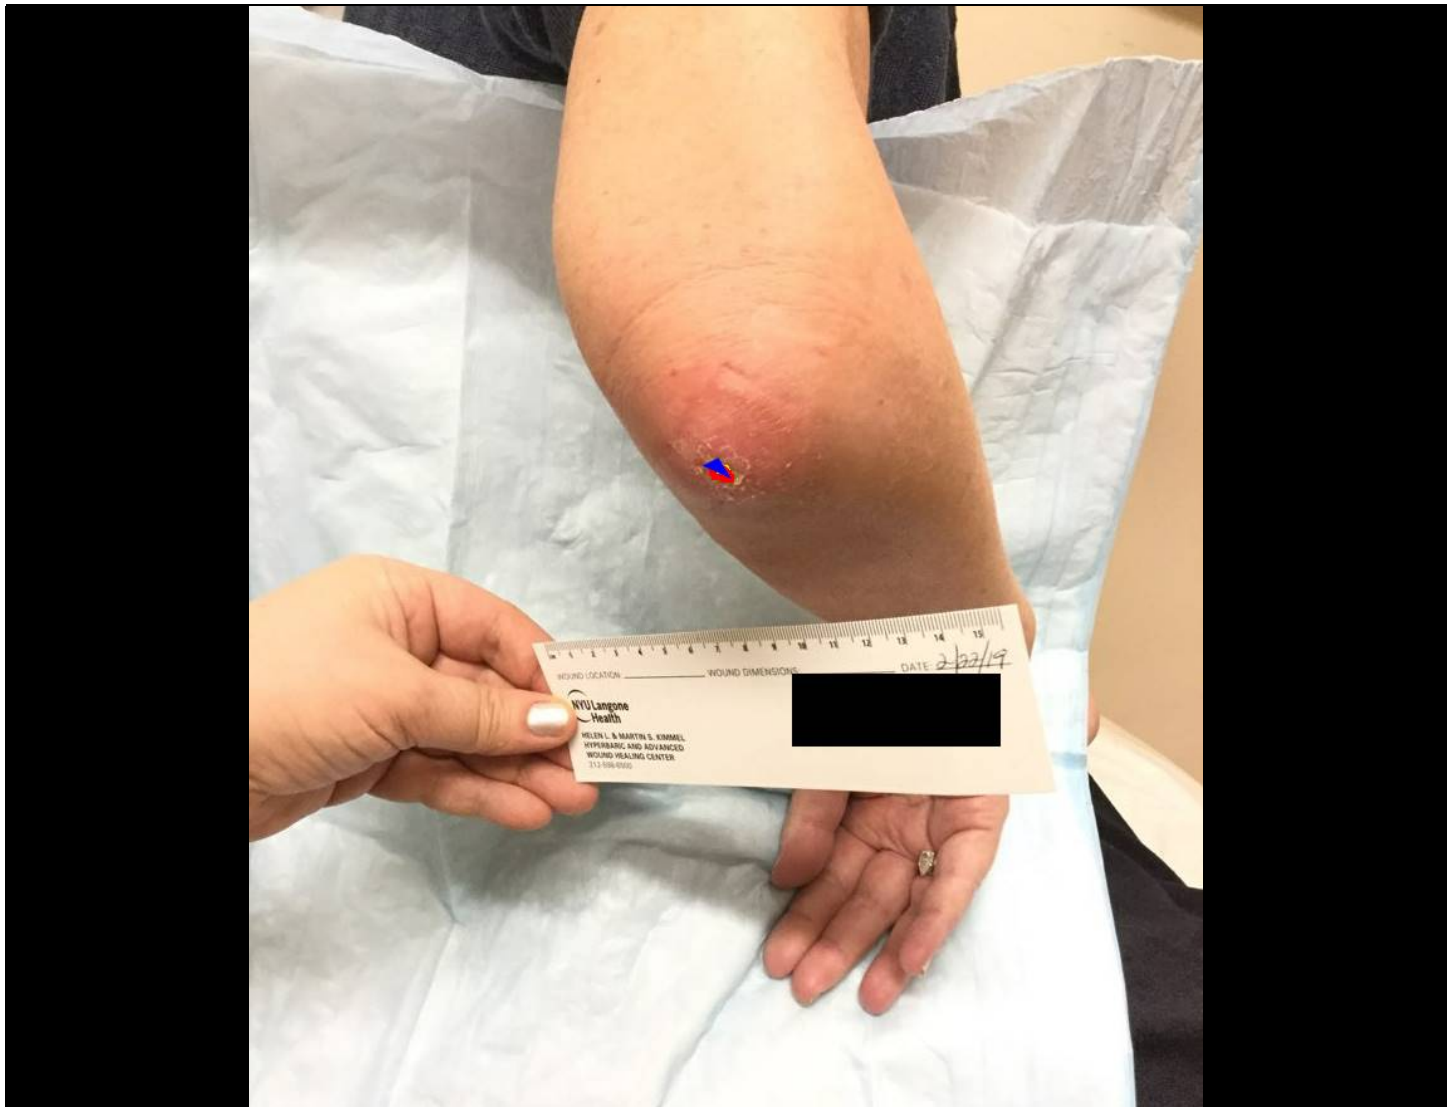

| Tracing Data |                               |                           |                               |
|--------------|-------------------------------|---------------------------|-------------------------------|
| Tracer:      | Wound Area (px <sup>2</sup> ) | Ruler Calibration (px/cm) | Wound Area (cm <sup>2</sup> ) |
| H1           | 45                            | 22.6                      | 0.09                          |
| H2           | 94                            | 23.3                      | 0.17                          |
| AI           | 28                            | 16.7                      | 0.10                          |

| Tracing Comparisons     |                     |                     |                     |                     |
|-------------------------|---------------------|---------------------|---------------------|---------------------|
| Difference Metric:      | Human-Human         |                     | Human-AI            |                     |
|                         | H1(ref)<br>H2(test) | H2(ref)<br>H1(test) | H1(ref)<br>AI(test) | H2(ref)<br>AI(test) |
| False Negative Area (%) | 6.7                 | 55.3                | 80.0                | 86.2                |
| False Positive Area (%) | 115.6               | 3.2                 | 42.2                | 16.0                |
| Relative Error (%)      | 108.9               | 52.1                | 37.8                | 70.2                |

| Blinded Attending Surgeon Review |              |                      |                      |                      |              |                         |
|----------------------------------|--------------|----------------------|----------------------|----------------------|--------------|-------------------------|
| Reviewer                         | PGT Estimate | H1 meets definition? | H2 meets definition? | AI meets definition? | Which is AI? | Which is most accurate? |
| 1                                | 0            | Yes                  | Yes                  | Yes                  | H2           | H2                      |
| 2                                | 50           | Yes                  | Yes                  | Yes                  | AI           | H1                      |
| 3                                | 0            | Yes                  | Yes                  | Yes                  | H2           | H2                      |

| Wound EMR Information |        |     |            |                |                   |                  |                  |                               |
|-----------------------|--------|-----|------------|----------------|-------------------|------------------|------------------|-------------------------------|
| Sequential Number     | Gender | Age | Wound Type | Wound Location | Wound Length (cm) | Wound Width (cm) | Wound Depth (cm) | Wound Area (cm <sup>2</sup> ) |
| 99                    | M      | 54  | Traumatic  | Left lower leg | 10.0              | 15.0             |                  | 150.00                        |

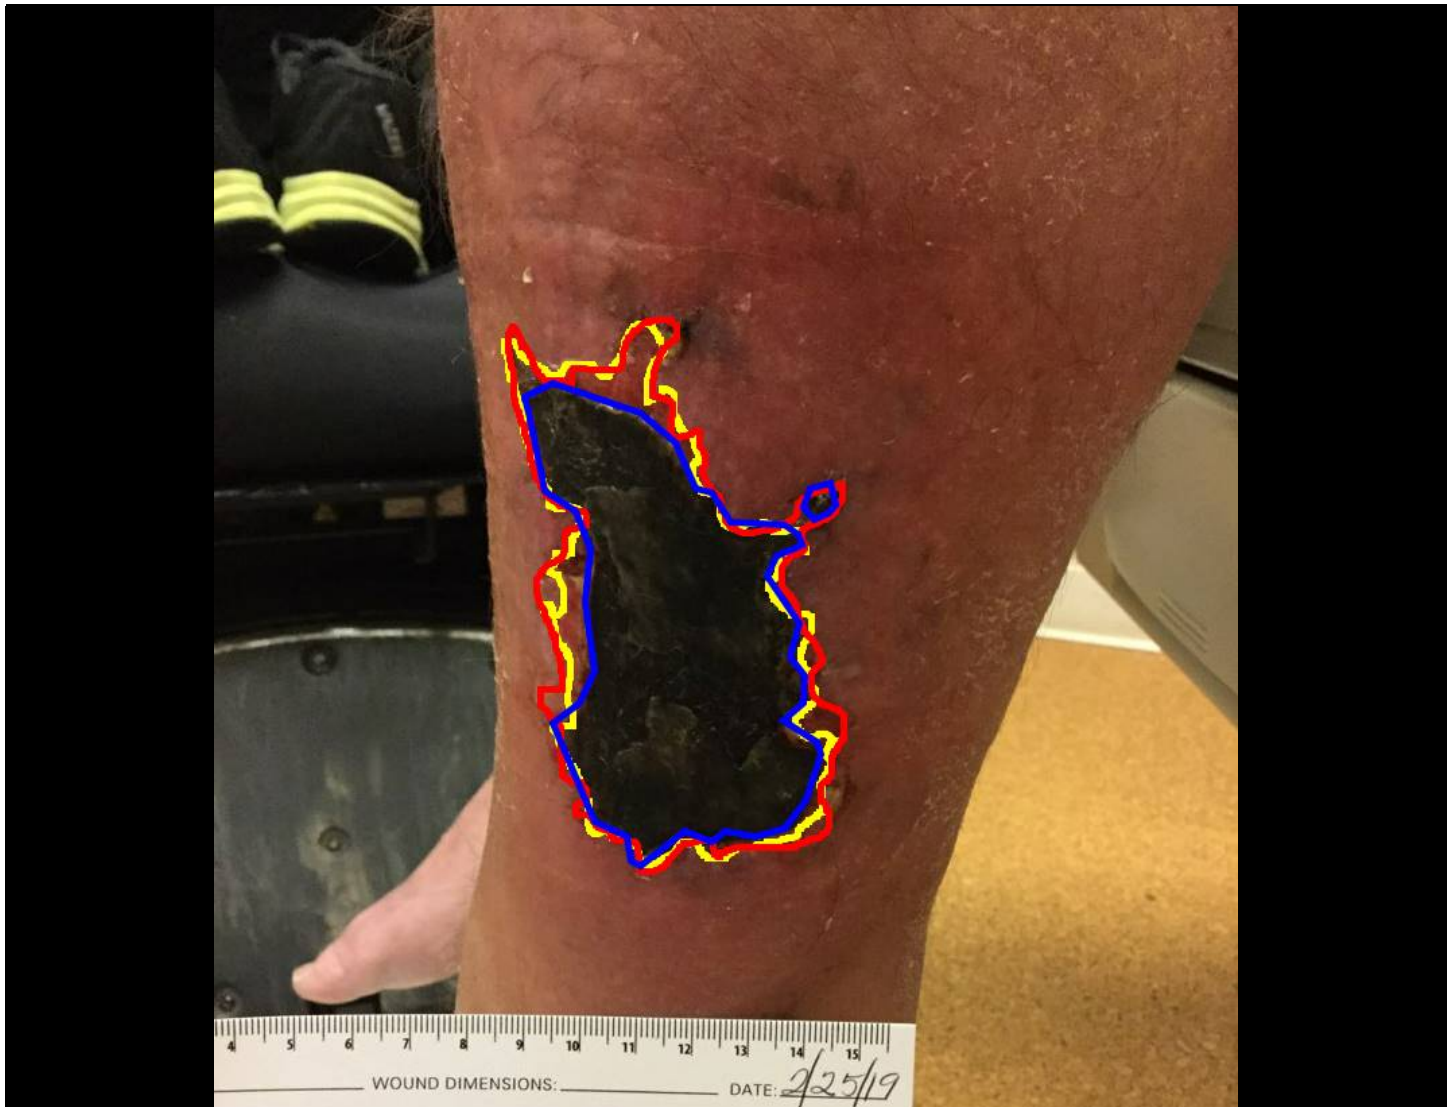

| Tracing Data |                               |                           |                               |
|--------------|-------------------------------|---------------------------|-------------------------------|
| Tracer:      | Wound Area (px <sup>2</sup> ) | Ruler Calibration (px/cm) | Wound Area (cm <sup>2</sup> ) |
| H1           | 55915                         | 41.8                      | 31.94                         |
| H2           | 60276                         | 42.3                      | 33.63                         |
| AI           | 47221                         | 41.1                      | 28.00                         |

| Tracing Comparisons     |                     |                     |                     |                     |
|-------------------------|---------------------|---------------------|---------------------|---------------------|
| Difference Metric:      | Human-Human         |                     | Human-AI            |                     |
|                         | H1(ref)<br>H2(test) | H2(ref)<br>H1(test) | H1(ref)<br>AI(test) | H2(ref)<br>AI(test) |
| False Negative Area (%) | 2.3                 | 9.4                 | 17.3                | 22.5                |
| False Positive Area (%) | 10.1                | 2.1                 | 1.8                 | 0.8                 |
| Relative Error (%)      | 7.8                 | 7.2                 | 15.5                | 21.7                |

| Blinded Attending Surgeon Review |              |                      |                      |                      |              |                         |
|----------------------------------|--------------|----------------------|----------------------|----------------------|--------------|-------------------------|
| Reviewer                         | PGT Estimate | H1 meets definition? | H2 meets definition? | AI meets definition? | Which is AI? | Which is most accurate? |
| 1                                | 10           | Yes                  | Yes                  | No                   | H1           | H1                      |
| 2                                | 0            | Yes                  | Yes                  | Yes                  | H2           | AI                      |
| 3                                | 10           | No                   | Yes                  | No                   | H1           | H1                      |

| Wound EMR Information |        |     |            |                  |                   |                  |                  |                               |
|-----------------------|--------|-----|------------|------------------|-------------------|------------------|------------------|-------------------------------|
| Sequential Number     | Gender | Age | Wound Type | Wound Location   | Wound Length (cm) | Wound Width (cm) | Wound Depth (cm) | Wound Area (cm <sup>2</sup> ) |
| 100                   | F      | 62  | Diabetic   | Left 4th/5th Toe |                   |                  |                  |                               |

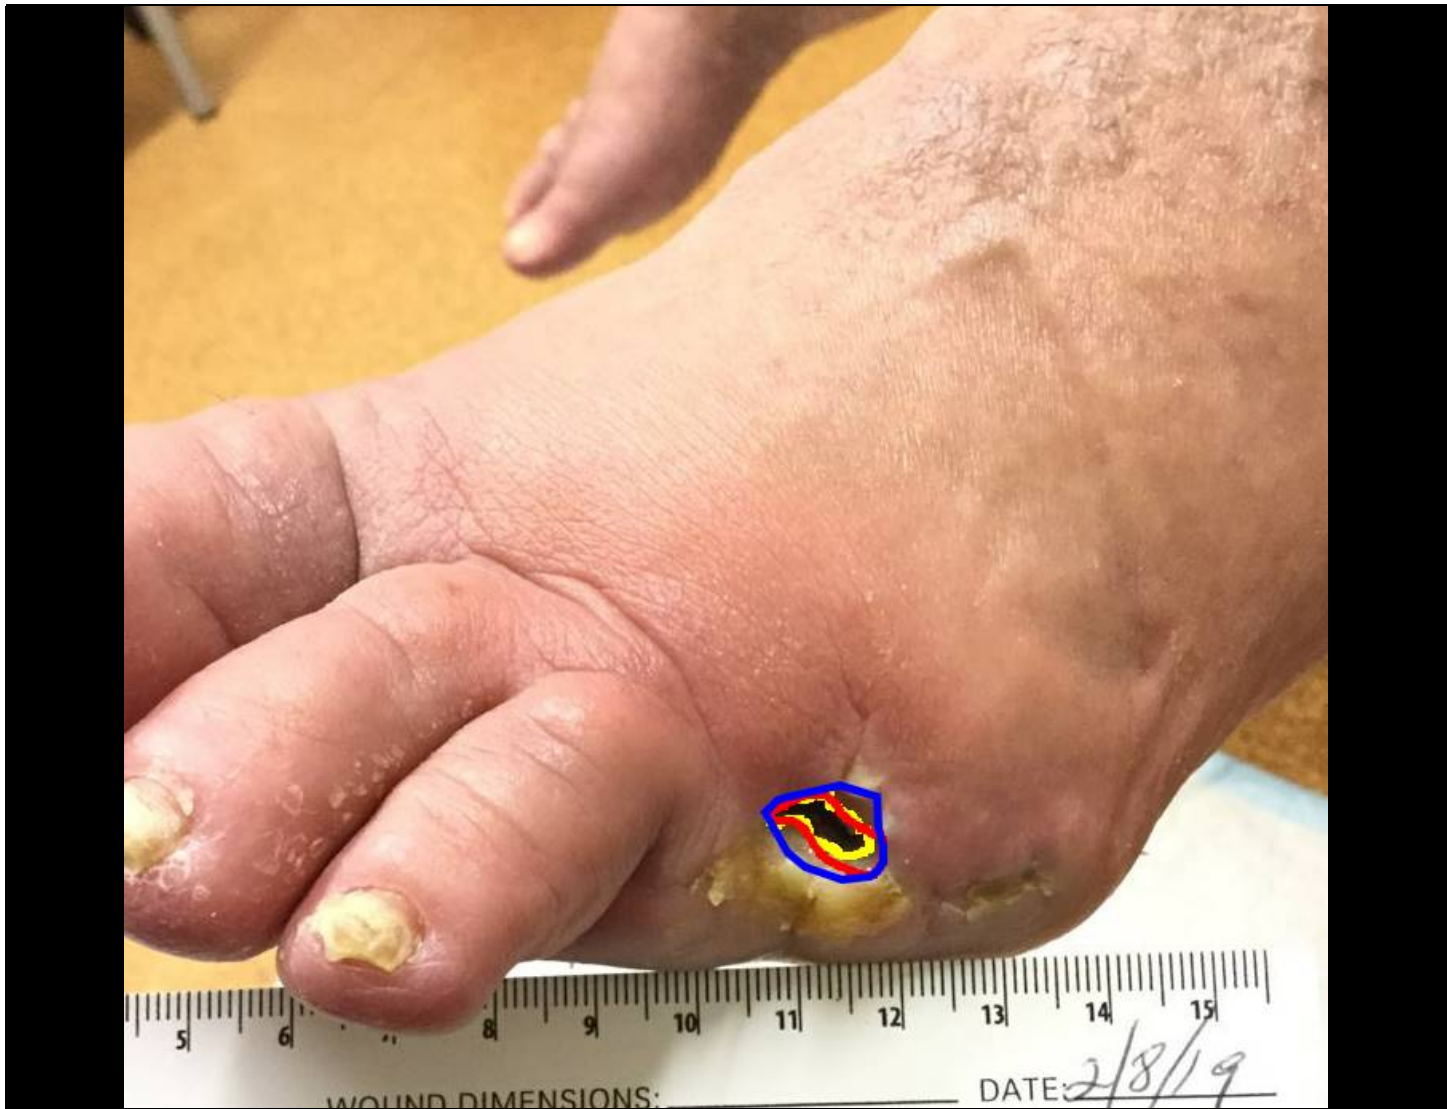

| Tracing Data |                               |                           |                               |
|--------------|-------------------------------|---------------------------|-------------------------------|
| Tracer:      | Wound Area (px <sup>2</sup> ) | Ruler Calibration (px/cm) | Wound Area (cm <sup>2</sup> ) |
| H1           | 1221                          | 64.4                      | 0.29                          |
| H2           | 1754                          | 64.0                      | 0.43                          |
| AI           | 3197                          | 63.2                      | 0.80                          |

| Tracing Comparisons     |                     |                     |                     |                     |
|-------------------------|---------------------|---------------------|---------------------|---------------------|
| Difference Metric:      | Human-Human         |                     | Human-AI            |                     |
|                         | H1(ref)<br>H2(test) | H2(ref)<br>H1(test) | H1(ref)<br>AI(test) | H2(ref)<br>AI(test) |
| False Negative Area (%) | 5.9                 | 34.5                | 0.0                 | 0.0                 |
| False Positive Area (%) | 49.5                | 4.1                 | 161.8               | 82.3                |
| Relative Error (%)      | 43.7                | 30.4                | 161.8               | 82.3                |

| Blinded Attending Surgeon Review |              |                      |                      |                      |              |                         |
|----------------------------------|--------------|----------------------|----------------------|----------------------|--------------|-------------------------|
| Reviewer                         | PGT Estimate | H1 meets definition? | H2 meets definition? | AI meets definition? | Which is AI? | Which is most accurate? |
| 1                                | 0            | Yes                  | Yes                  | No                   | H2           | H1                      |
| 2                                | 50           | Yes                  | Yes                  | Yes                  | AI           | H1                      |
| 3                                | 100          | Yes                  | No                   | No                   | H1           | H2                      |

| Wound EMR Information |        |     |            |                |                   |                  |                  |                               |
|-----------------------|--------|-----|------------|----------------|-------------------|------------------|------------------|-------------------------------|
| Sequential Number     | Gender | Age | Wound Type | Wound Location | Wound Length (cm) | Wound Width (cm) | Wound Depth (cm) | Wound Area (cm <sup>2</sup> ) |
| 101                   | F      | 17  | Pressure   | Left ischium   | 3.0               | 2.0              |                  | 6.00                          |

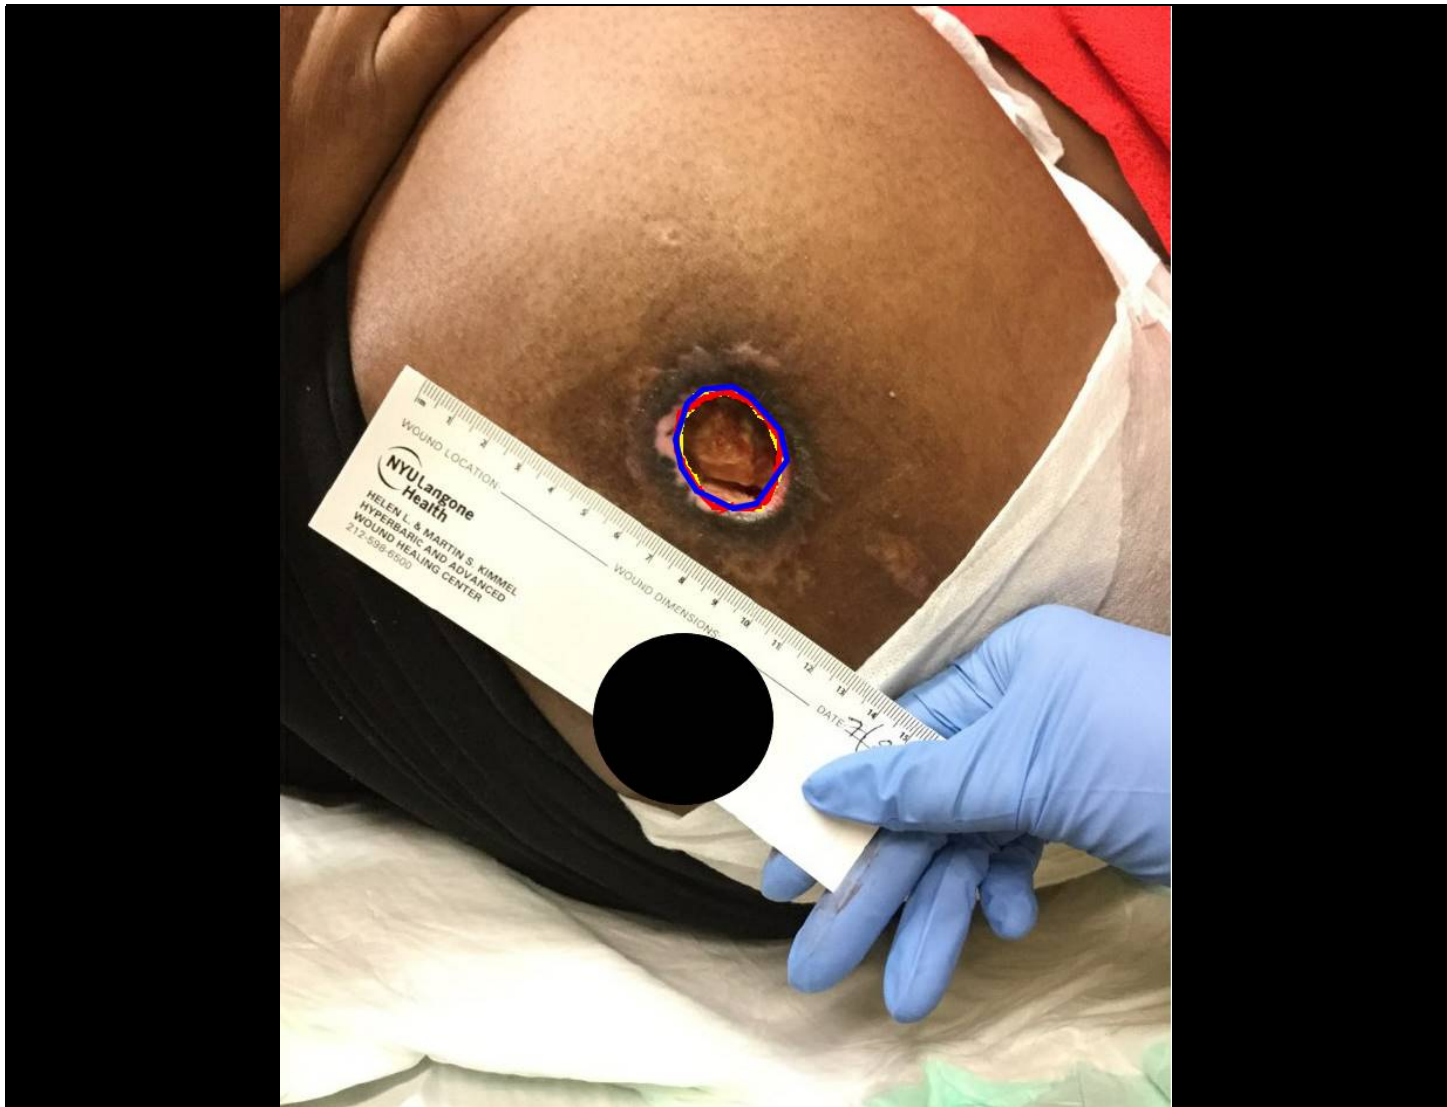

| Tracing Data |                               |                           |                               |
|--------------|-------------------------------|---------------------------|-------------------------------|
| Tracer:      | Wound Area (px <sup>2</sup> ) | Ruler Calibration (px/cm) | Wound Area (cm <sup>2</sup> ) |
| H1           | 6607                          | 33.8                      | 5.79                          |
| H2           | 6751                          | 34.9                      | 5.53                          |
| AI           | 7096                          | 34.7                      | 5.90                          |

| Tracing Comparisons     |                     |                     |                     |                     |
|-------------------------|---------------------|---------------------|---------------------|---------------------|
| Difference Metric:      | Human-Human         |                     | Human-AI            |                     |
|                         | H1(ref)<br>H2(test) | H2(ref)<br>H1(test) | H1(ref)<br>AI(test) | H2(ref)<br>AI(test) |
| False Negative Area (%) | 2.1                 | 4.2                 | 2.1                 | 3.7                 |
| False Positive Area (%) | 4.3                 | 2.1                 | 9.5                 | 8.8                 |
| Relative Error (%)      | 2.2                 | 2.1                 | 7.4                 | 5.1                 |

| Blinded Attending Surgeon Review |              |                      |                      |                      |              |                         |
|----------------------------------|--------------|----------------------|----------------------|----------------------|--------------|-------------------------|
| Reviewer                         | PGT Estimate | H1 meets definition? | H2 meets definition? | AI meets definition? | Which is AI? | Which is most accurate? |
| 1                                | 20           | Yes                  | Yes                  | Yes                  | H2           | AI                      |
| 2                                | 90           | Yes                  | Yes                  | Yes                  | H2           | AI                      |
| 3                                | 50           | Yes                  | Yes                  | Yes                  | AI           | H2                      |

| Wound EMR Information |        |     |            |                |                   |                  |                  |                               |
|-----------------------|--------|-----|------------|----------------|-------------------|------------------|------------------|-------------------------------|
| Sequential Number     | Gender | Age | Wound Type | Wound Location | Wound Length (cm) | Wound Width (cm) | Wound Depth (cm) | Wound Area (cm <sup>2</sup> ) |
| 102                   | M      | 55  | Surgical   | Left knee      |                   |                  |                  |                               |

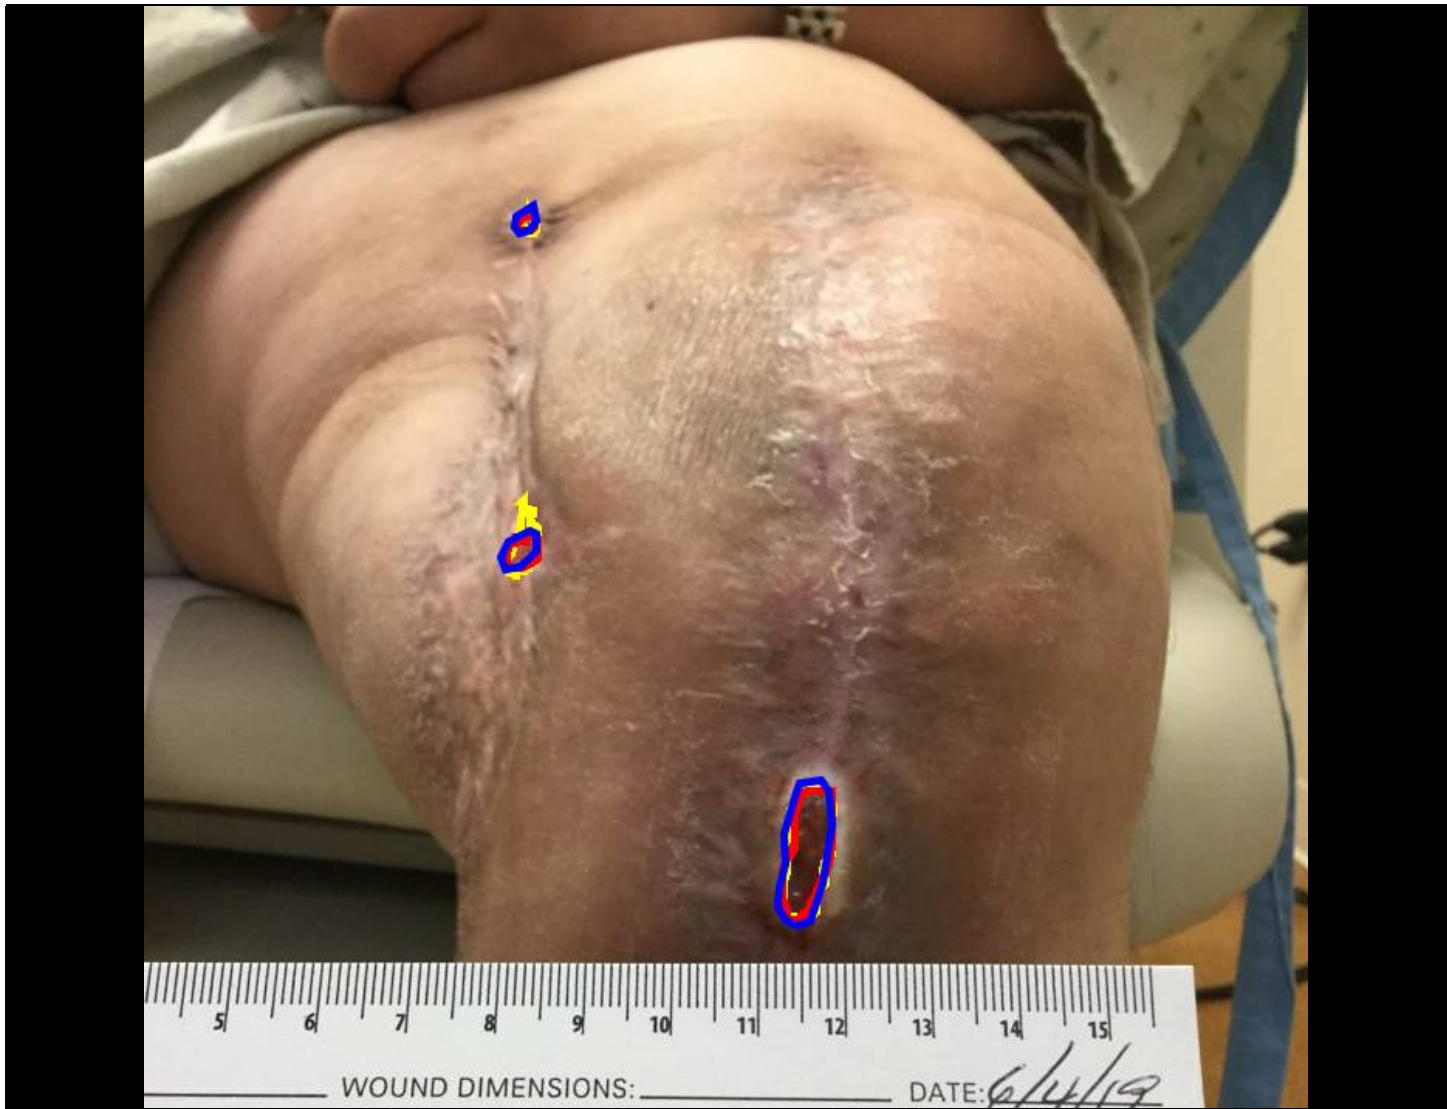

| Tracing Data |                               |                           |                               |
|--------------|-------------------------------|---------------------------|-------------------------------|
| Tracer:      | Wound Area (px <sup>2</sup> ) | Ruler Calibration (px/cm) | Wound Area (cm <sup>2</sup> ) |
| H1           | 2554                          | 56.0                      | 0.81                          |
| H2           | 2285                          | 55.0                      | 0.76                          |
| AI           | 2801                          | 55.8                      | 0.90                          |

| Tracing Comparisons     |                     |                     |                     |                     |
|-------------------------|---------------------|---------------------|---------------------|---------------------|
| Difference Metric:      | Human-Human         |                     | Human-AI            |                     |
|                         | H1(ref)<br>H2(test) | H2(ref)<br>H1(test) | H1(ref)<br>AI(test) | H2(ref)<br>AI(test) |
| False Negative Area (%) | 17.0                | 7.2                 | 9.1                 | 4.4                 |
| False Positive Area (%) | 6.5                 | 19.0                | 18.8                | 27.0                |
| Relative Error (%)      | 10.5                | 11.8                | 9.7                 | 22.6                |

| Blinded Attending Surgeon Review |              |                      |                      |                      |              |                         |
|----------------------------------|--------------|----------------------|----------------------|----------------------|--------------|-------------------------|
| Reviewer                         | PGT Estimate | H1 meets definition? | H2 meets definition? | AI meets definition? | Which is AI? | Which is most accurate? |
| 1                                | 90           | Yes                  | Yes                  | Yes                  | H1           | H2                      |
| 2                                | 100          | Yes                  | Yes                  | Yes                  | H1           | H2                      |
| 3                                | 90           | Yes                  | No                   | No                   | H2           | H2                      |



| Wound EMR Information |        |     |            |                  |                   |                  |                  |                               |
|-----------------------|--------|-----|------------|------------------|-------------------|------------------|------------------|-------------------------------|
| Sequential Number     | Gender | Age | Wound Type | Wound Location   | Wound Length (cm) | Wound Width (cm) | Wound Depth (cm) | Wound Area (cm <sup>2</sup> ) |
| 103                   | F      | 68  | Unknown    | Lateral to labia |                   |                  |                  |                               |

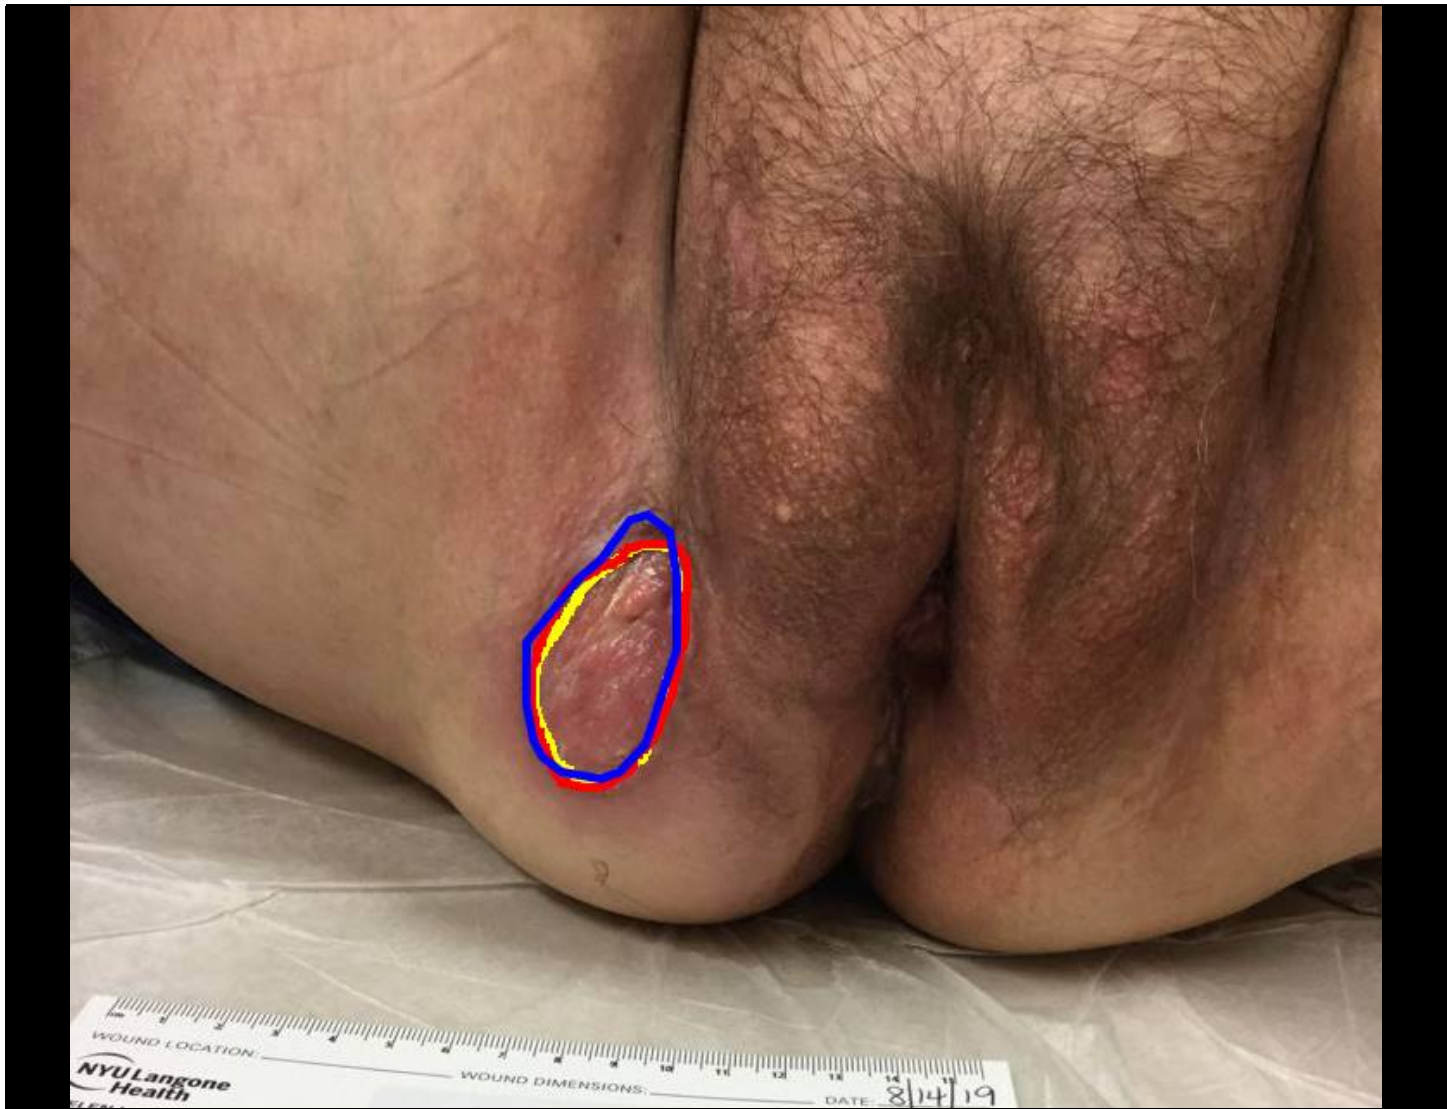

| Tracing Data |                               |                           |                               |
|--------------|-------------------------------|---------------------------|-------------------------------|
| Tracer:      | Wound Area (px <sup>2</sup> ) | Ruler Calibration (px/cm) | Wound Area (cm <sup>2</sup> ) |
| H1           | 8174                          | 32.0                      | 7.99                          |
| H2           | 9294                          | 32.4                      | 8.83                          |
| AI           | 9455                          | 31.5                      | 9.50                          |

| Tracing Comparisons     |                     |                     |                     |                     |
|-------------------------|---------------------|---------------------|---------------------|---------------------|
| Difference Metric:      | Human-Human         |                     | Human-AI            |                     |
|                         | H1(ref)<br>H2(test) | H2(ref)<br>H1(test) | H1(ref)<br>AI(test) | H2(ref)<br>AI(test) |
| False Negative Area (%) | 0.4                 | 12.4                | 1.5                 | 7.4                 |
| False Positive Area (%) | 14.1                | 0.3                 | 17.2                | 9.1                 |
| Relative Error (%)      | 13.7                | 12.1                | 15.7                | 1.7                 |

| Blinded Attending Surgeon Review |              |                      |                      |                      |              |                         |
|----------------------------------|--------------|----------------------|----------------------|----------------------|--------------|-------------------------|
| Reviewer                         | PGT Estimate | H1 meets definition? | H2 meets definition? | AI meets definition? | Which is AI? | Which is most accurate? |
| 1                                | 90           | No                   | No                   | Yes                  | H2           | H1                      |
| 2                                | 100          | Yes                  | Yes                  | Yes                  | H1           | AI                      |
| 3                                | 90           | Yes                  | Yes                  | No                   | AI           | H2                      |

| Wound EMR Information |        |     |            |                |                   |                  |                  |                               |
|-----------------------|--------|-----|------------|----------------|-------------------|------------------|------------------|-------------------------------|
| Sequential Number     | Gender | Age | Wound Type | Wound Location | Wound Length (cm) | Wound Width (cm) | Wound Depth (cm) | Wound Area (cm <sup>2</sup> ) |
| 104                   | F      | 54  | Surgical   | Abdomen        | 4.5               | 3.0              | 4.5              | 13.50                         |

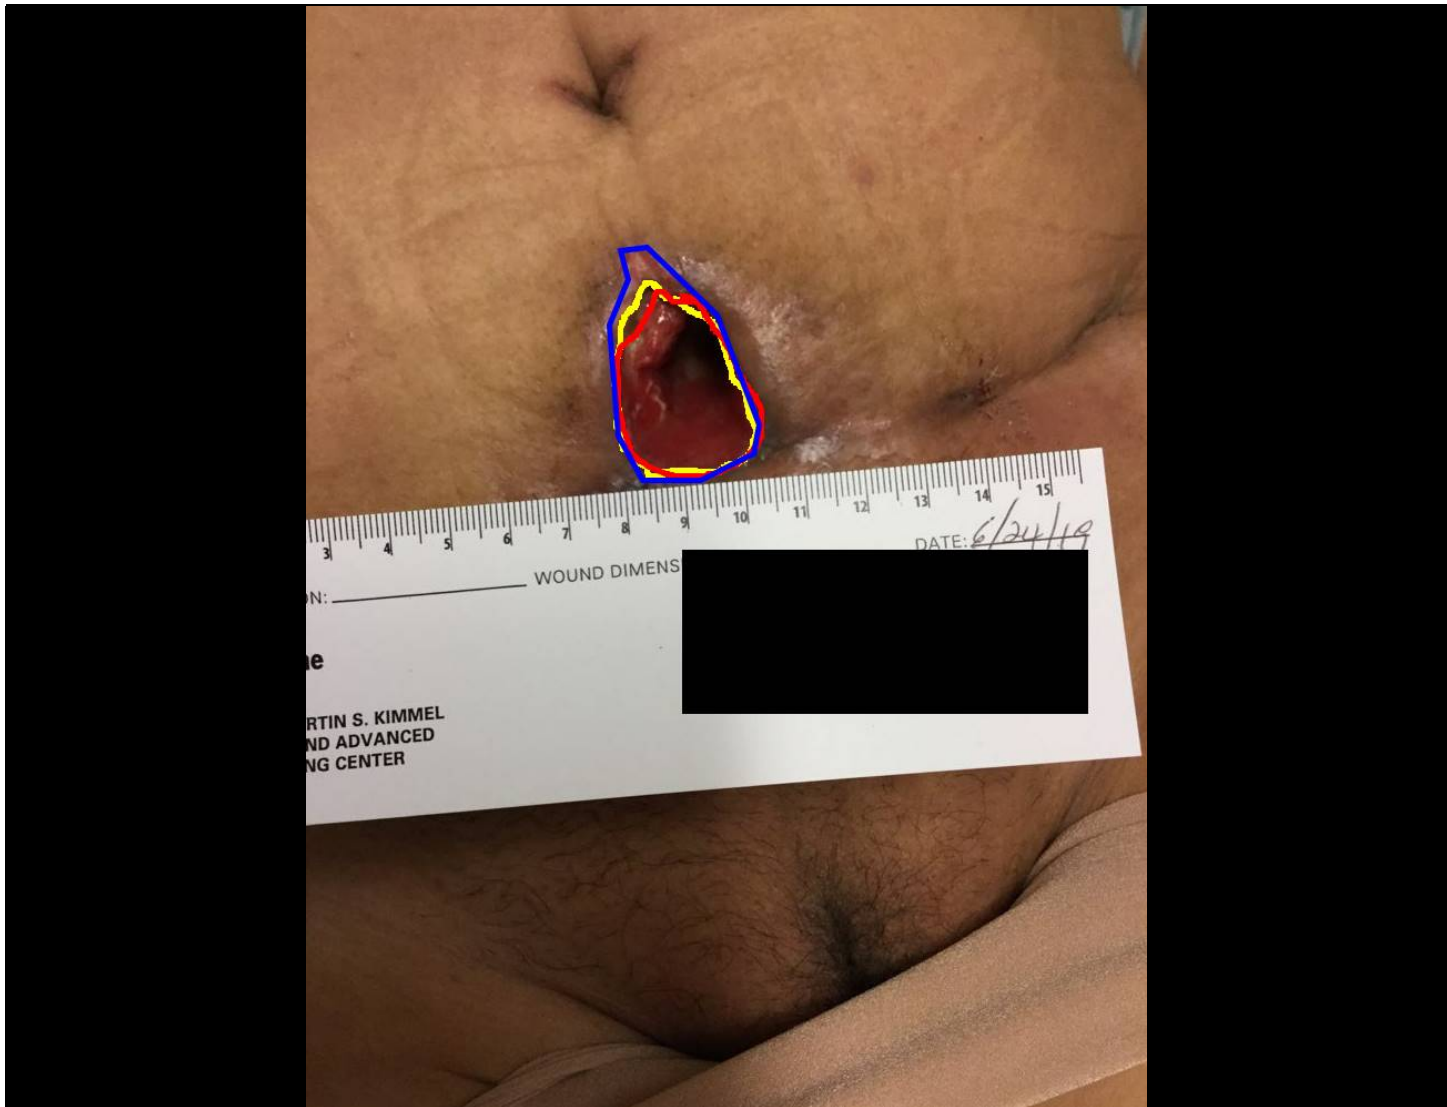

| Tracing Data |                               |                           |                               |
|--------------|-------------------------------|---------------------------|-------------------------------|
| Tracer:      | Wound Area (px <sup>2</sup> ) | Ruler Calibration (px/cm) | Wound Area (cm <sup>2</sup> ) |
| H1           | 15619                         | 53.7                      | 5.41                          |
| H2           | 15495                         | 55.4                      | 5.04                          |
| AI           | 19538                         | 56.1                      | 6.20                          |

| Tracing Comparisons     |                     |                     |                     |                     |
|-------------------------|---------------------|---------------------|---------------------|---------------------|
| Difference Metric:      | Human-Human         |                     | Human-AI            |                     |
|                         | H1(ref)<br>H2(test) | H2(ref)<br>H1(test) | H1(ref)<br>AI(test) | H2(ref)<br>AI(test) |
| False Negative Area (%) | 7.6                 | 6.9                 | 0.1                 | 1.5                 |
| False Positive Area (%) | 6.8                 | 7.7                 | 25.2                | 27.6                |
| Relative Error (%)      | 0.8                 | 0.8                 | 25.1                | 26.1                |

| Blinded Attending Surgeon Review |              |                      |                      |                      |              |                         |
|----------------------------------|--------------|----------------------|----------------------|----------------------|--------------|-------------------------|
| Reviewer                         | PGT Estimate | H1 meets definition? | H2 meets definition? | AI meets definition? | Which is AI? | Which is most accurate? |
| 1                                | 60           | No                   | No                   | Yes                  | H2           | H1                      |
| 2                                | 100          | Yes                  | Yes                  | Yes                  | H2           | AI                      |
| 3                                | 90           | Yes                  | No                   | No                   | H1           | H2                      |

## **eAppendix 3. Supplementary Discussion**

### **Analysis of tracing discrepancy subgroups**

Visual inspection of the traces revealed that different types of discrepancies can be observed which can be classified into several subgroups:

#### *Wounds annotated with slightly different borders:*

In these cases, the human annotators and algorithm have closely overlapping wound boundaries with relatively small error measure values across annotators. Some examples include Site 1 wounds 9, 20, 21, 24, and 27. The bulk of wound photos qualitatively appear to be of this category.

#### *Wounds annotated with highly different borders or with different included regions/satellite areas:*

In these cases, there is a distinct region or there are multiple regions of the wound where there is disagreement between human annotators and/or the algorithm whether the region met the definition of wound area (i.e. discrepancies are due to disagreeing whether a patch of a certain color is epithelialized or which contour constitutes the wound boundary rather than being due to hasty/sloppy tracings). Some examples include Site 1, photo numbers 8, 10, 11, 13, and 29. In some cases, satellite wound areas are recognized differently across annotators (for example Site 1 photo numbers 38 and 91). The standard definition of wound area for this study used a distance cutoff for inclusion satellite wounds, but this may be difficult to assess consistently for satellite areas near the cutoff point. For wounds with several open areas of similar size, it may be difficult for annotators to determine the main wound for tracing.

#### *Disagreements regarding complete healing or presence of a wound:*

In these cases, there is a lack of consensus on the presence of an open wound (a subset of annotators made a tracing). This appears to happen for example in cases where annotators disagree whether a visibly contrasted region is epithelialized or not, or whether there is adequate contrast in a region to indicate presence of an open wound or wound edge (for example Site 1 photo numbers 17, 28, 34, 43, 47, and 74).
